# Supplementary material for: A Tail Does Not Always Make a Difference: Assembly of cds Nets from Co(NCS)2 and 1,4-bis(n-Alkyloxy)-2,5-bis(3,2′:6′,3″-terpyridin-4′-yl)benzene Ligands
Source: MDPI journal article supplement (doi:10.3390/molecules27154995), 2022-08-05
Supplement: s1 [file s1]

## A Tail Does Not Always Make a Difference: Assembly of *cds* Nets from Co(NCS)<sub>2</sub> and 1,4-bis(*n*- Alkyloxy)-2,5-bis(3,2':6',3''-terpyridin-4'-yl)benzene Ligands

Simona S. Capomolla, Giacomo Manfroni, Alessandro Prescimone, Edwin C. Constable  
and Catherine E. Housecroft \*

Department of Chemistry, University of Basel, BPR 1096, Mattenstrasse 24a,  
CH-4058 Basel, Switzerland

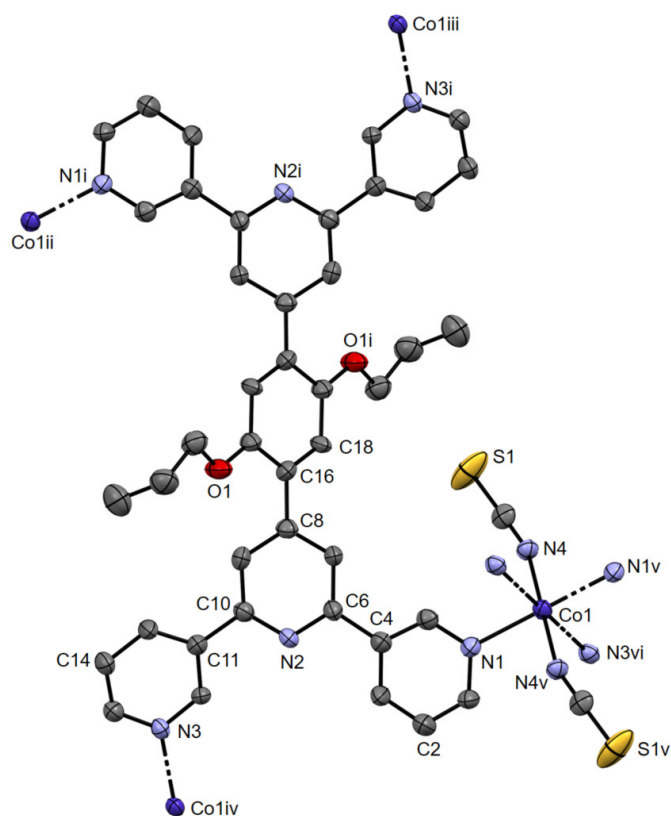

**Figure S1.** The structure of the asymmetric unit in [Co(NCS)<sub>2</sub>(3)]<sub>n</sub>·3.5n C<sub>6</sub>H<sub>4</sub>Cl<sub>2</sub>, with symmetry generated atoms. Hydrogen atoms are omitted for clarity; ellipsoids are plotted at 50% probability level. Symmetry codes: i = -1-x, -1-y, -1-z; ii = 1+x, y, 1+z; iii = -1-x, 1/2+y, -3/2-z; iv = -2-x, -1/2+y, -3/2-z; v = -2-x, -1-y, -2-z; vi = -2-x, 1/2+y, -3/2-z.

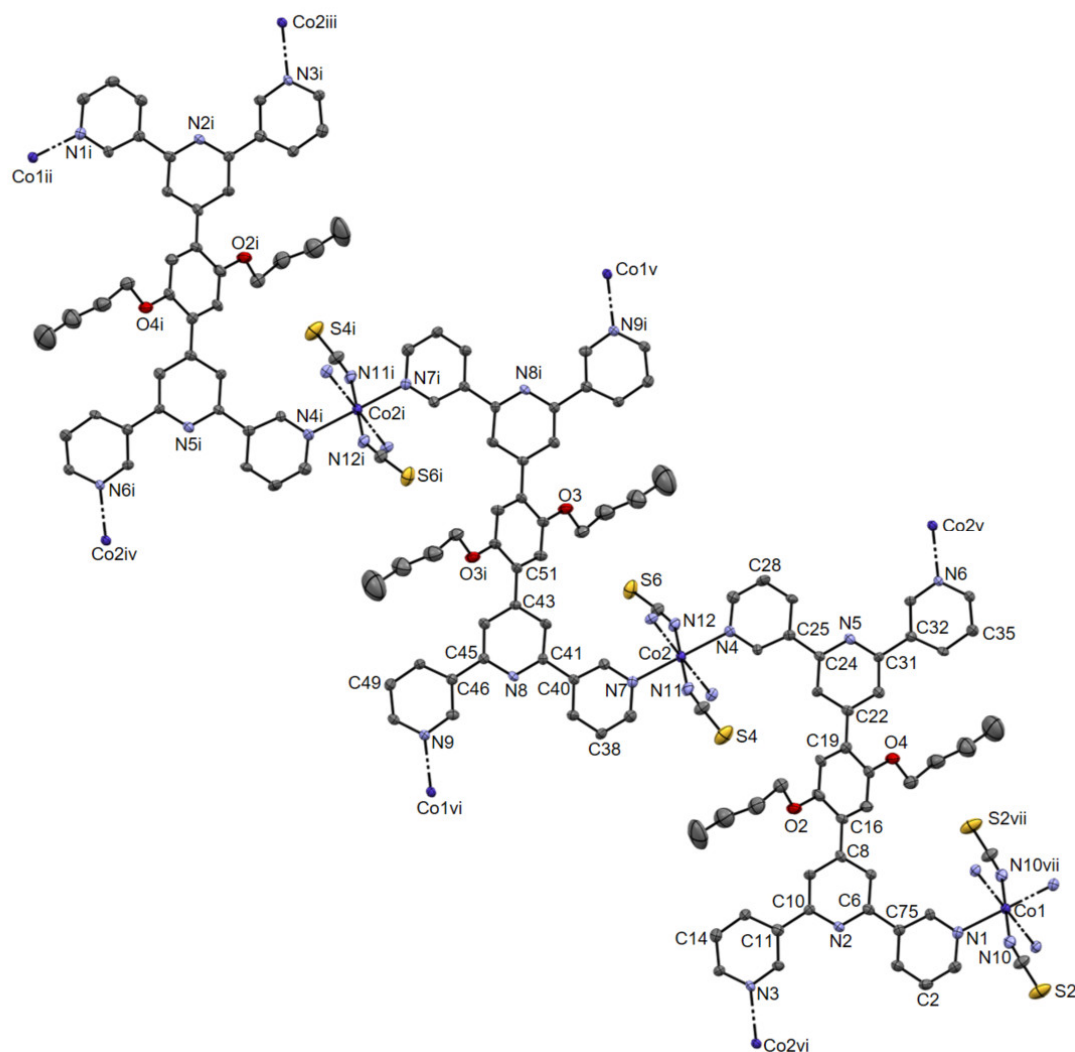

**Figure S2.** The structure of the asymmetric unit in  $[\text{Co}(\text{NCS})_2(\mathbf{4})]_n \cdot 5.5n\text{C}_6\text{H}_4\text{Cl}_2$ , with symmetry generated atoms. Hydrogen atoms and solvent molecules are omitted for clarity; ellipsoids are plotted at 50% probability level. Symmetry codes: i =  $1-x, 1-y, 2-z$ ; ii =  $-1+x, y, 1+z$ ; iii =  $-1+x, 1/2-y, 1/2+z$ ; iv =  $x, 1/2-y, 1/2+z$ ; v =  $1-x, -1/2+y, 3/2-z$ ; vi =  $2-x, 1/2+y, 3/2-z$ ; vii =  $2-x, 1-y, 1-z$ . The sulfur atoms S2, S4 and S6 of the  $[\text{NCS}]^-$  units are disordered and have been modelled over sites of 50:30:20%, 60:20:20% and 70:30% occupancies, respectively, and only the major occupancy site is shown. The terminal unit in the  $-\text{OButyl}$  chain on O3 is disordered and has been modelled over sites of 75% and 25% occupancies and only the major occupancy site is shown.

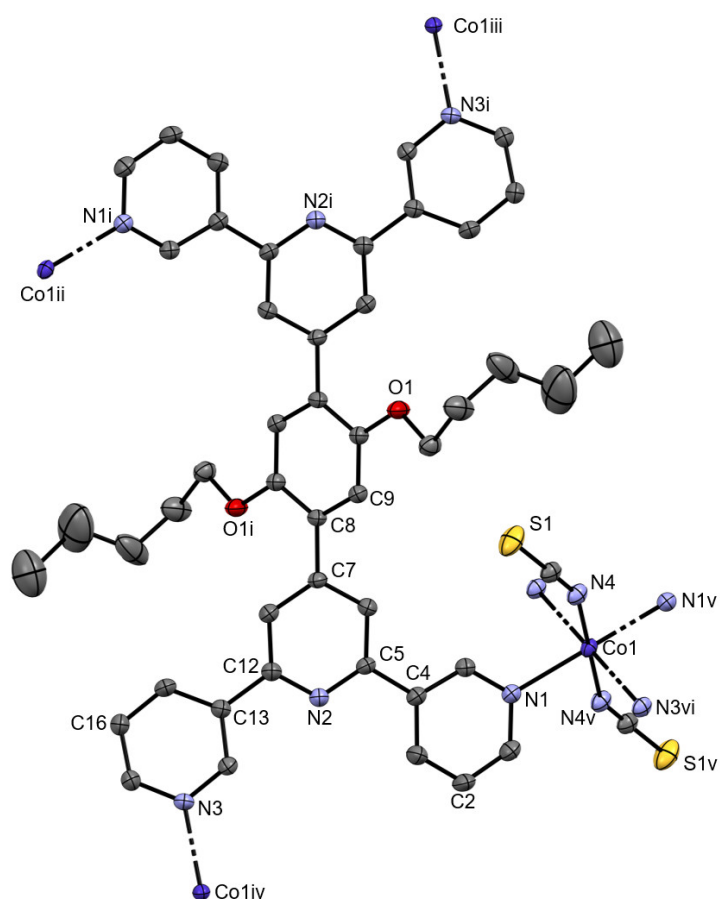

**Figure S3.** The structure of the asymmetric unit in  $[\text{Co}(\text{NCS})_2(\mathbf{5})]_n \cdot 4n\text{C}_6\text{H}_4\text{Cl}_2$ , with symmetry generated atoms. Hydrogen atoms and solvent molecules are omitted for clarity; ellipsoids are plotted at 50% probability level. Symmetry codes: i =  $1-x, 1-y, 1-z$ ; ii =  $x, y, 1+z$ ; iii =  $1/2-x, 1/2+y, 1/2-z$ ; iv =  $3/2-x, -1/2+y, 1/2-z$ ; v =  $1-x, 1-y, -z$ ; vi =  $3/2-x, 1/2+y, 1/2-z$ .

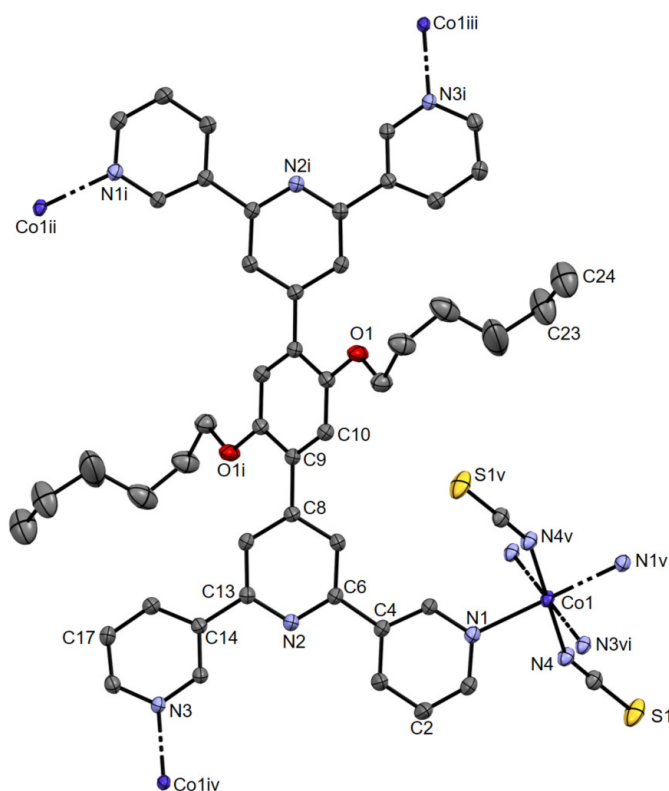

**Figure S4.** The structure of the asymmetric unit in  $[\text{Co}(\text{NCS})_2(\mathbf{6})] \cdot 3.8n\text{C}_6\text{H}_4\text{Cl}_2$ , with symmetry generated atoms. Hydrogen atoms and solvent molecules are omitted for clarity; ellipsoids are plotted at 50% probability level. Symmetry codes: i =  $1-x, 1-y, 2-z$ ; ii =  $x, y, 1+z$ ; iii =  $1/2-x, 1/2+y, 3/2-z$ ; iv =  $3/2-x, -1/2+y, 3/2-z$ ; v =  $1-x, 1-y, 1-z$ ; vi =  $3/2-x, 1/2+y, 3/2-z$ . The terminal units with C23 and C24 in the –OHexyl chain are disordered and have been modelled over sites of 60% and 40% occupancies and only the major one is shown.

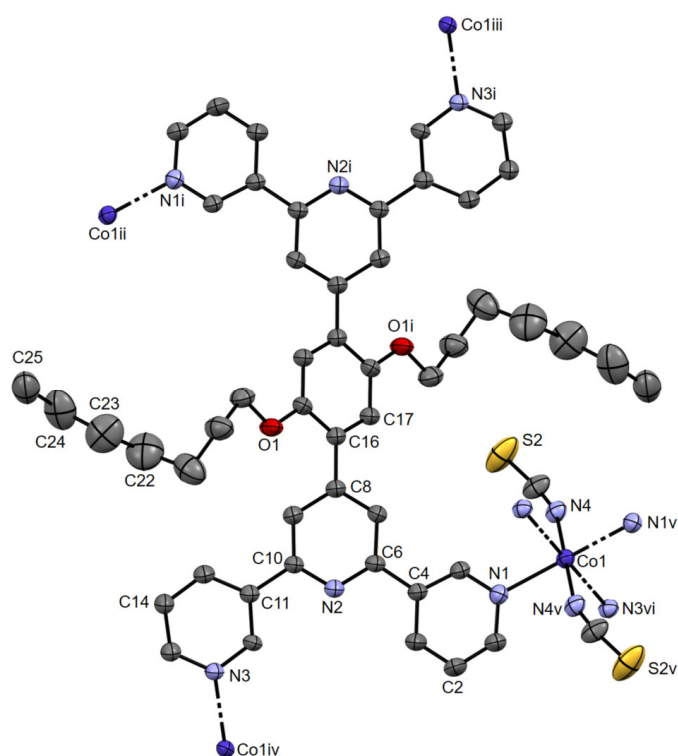

**Figure S5.** The structure of the asymmetric unit in  $[\text{Co}(\text{NCS})_2(\mathbf{7})]_n \cdot 3.1n\text{C}_6\text{H}_4\text{Cl}_2$ , with symmetry generated atoms. Hydrogen atoms and solvent molecules are omitted for clarity; ellipsoids are plotted at 50% probability level. Symmetry codes: i =  $1-x, 1-y, 1-z$ ; ii =  $x, y, -1+z$ ; iii =  $3/2-x, -1/2+y, 3/2-z$ ; iv =  $1/2-x, 1/2+y, 3/2-z$ ; v =  $1-x, 1-y, 2-z$ ; vi =  $1/2-x, -1/2+y, 3/2-z$ . The terminal units with C22, C23, C24 and C25 in the –OHeptyl chain are disordered and have been modelled over sites of 50% and 50% occupancies and only one of the equal occupancy sites is shown. The sulfur S2 of the  $[\text{NCS}]^-$  unit is disordered and has been modelled over sites of 80% and 20% occupancies and only the major occupancy site is shown.

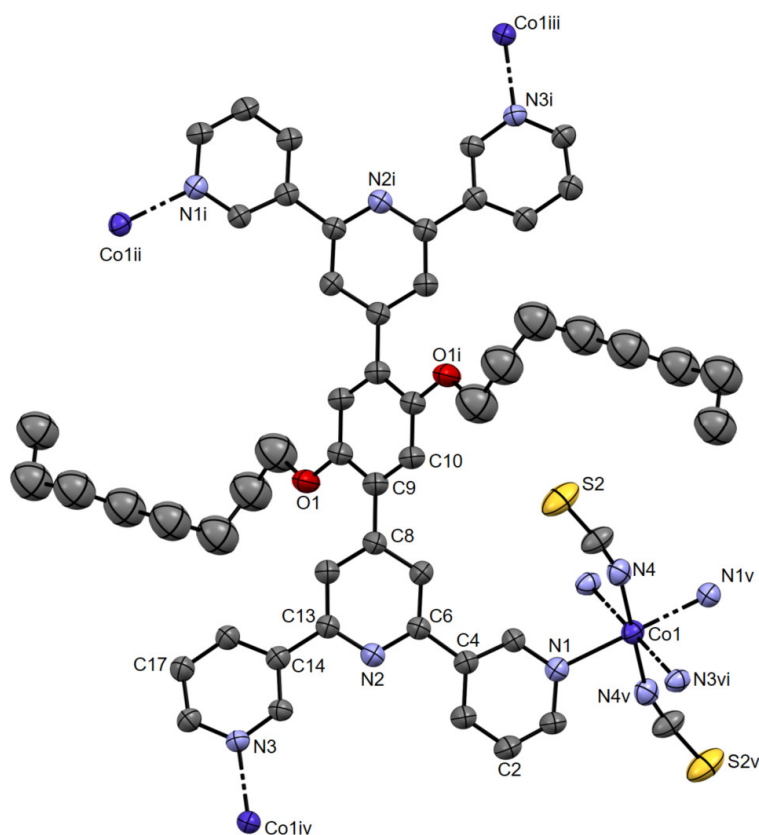

**Figure S6.** The structure of the asymmetric unit in  $[\text{Co}(\text{NCS})_2(\mathbf{8})]_n \cdot 1.6n\text{C}_6\text{H}_4\text{Cl}_2 \cdot 2n\text{MeOH}$ , with symmetry generated atoms. Hydrogen atoms and solvent molecules are omitted for clarity; ellipsoids are plotted at 50% probability level. Symmetry codes: i =  $-x, 1-y, 1-z$ ; ii =  $x, y, 1+z$ ; iii =  $-1/2-x, 1/2+y, 1/2-z$ ; iv =  $1/2-x, -1/2+y, 1/2-z$ ; v =  $-x, 1-y, -z$ ; vi =  $1/2-x, 1/2+y, 1/2-z$ . The sulfur atom S2 of the  $[\text{NCS}]^-$  unit is disordered and has been modelled over sites of 80% and 20% occupancies and only the major occupancy site is shown.

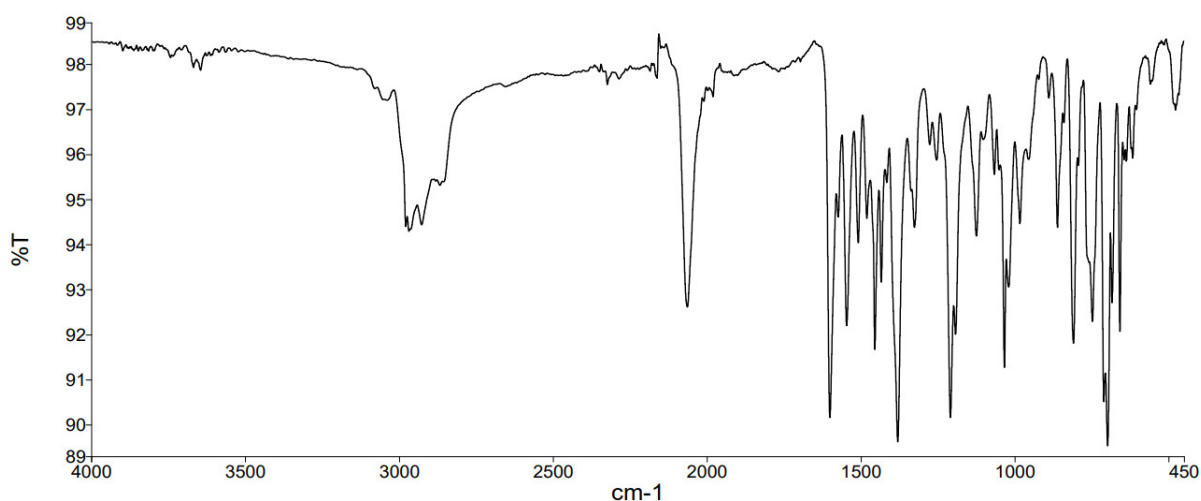

**Figure S7.** The solid-state FT-IR spectrum of  $[\text{Co}(\text{NCS})_2(\mathbf{3})]_n \cdot 3.5n\text{C}_6\text{H}_4\text{Cl}_2$ .

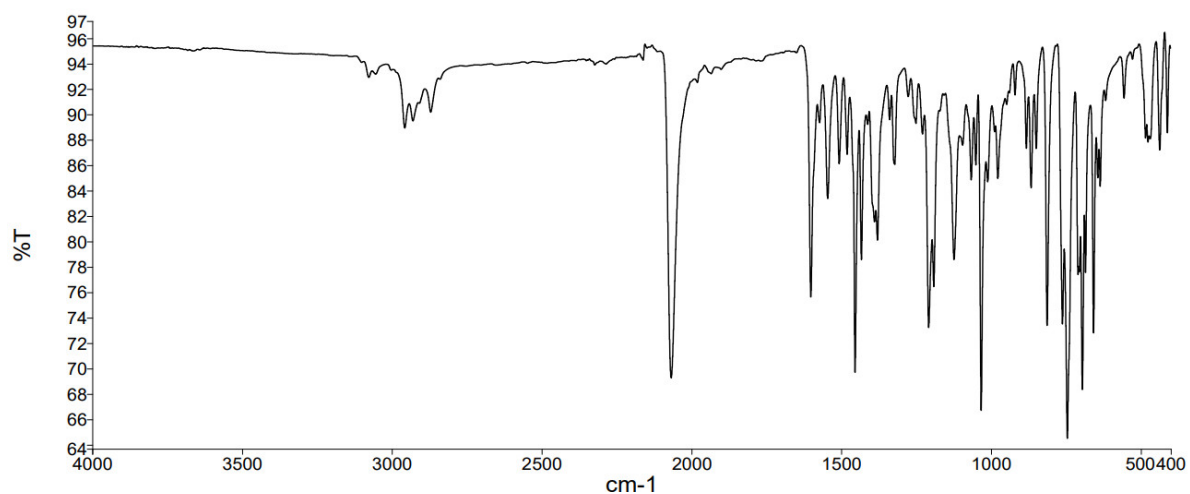

**Figure S8.** The solid-state FT-IR spectrum of  $[\text{Co}(\text{NCS})_2(\mathbf{4})]_n \cdot 5.5n\text{C}_6\text{H}_4\text{Cl}_2$ .

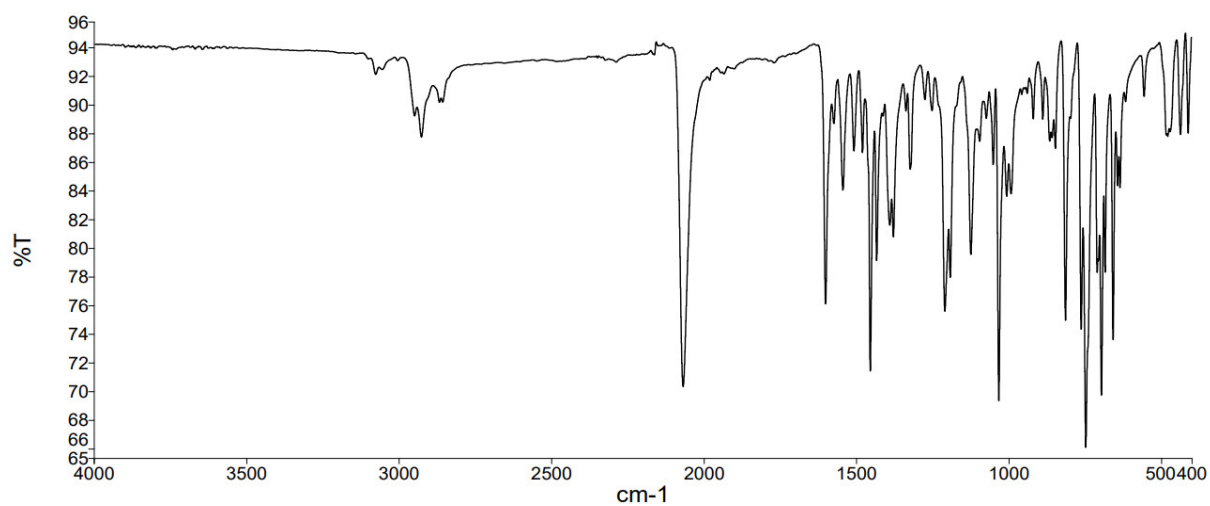

**Figure S9.** The solid-state FT-IR spectrum of  $[\text{Co}(\text{NCS})_2(\mathbf{5})]_n \cdot 4nC_6\text{H}_4\text{Cl}_2$ .

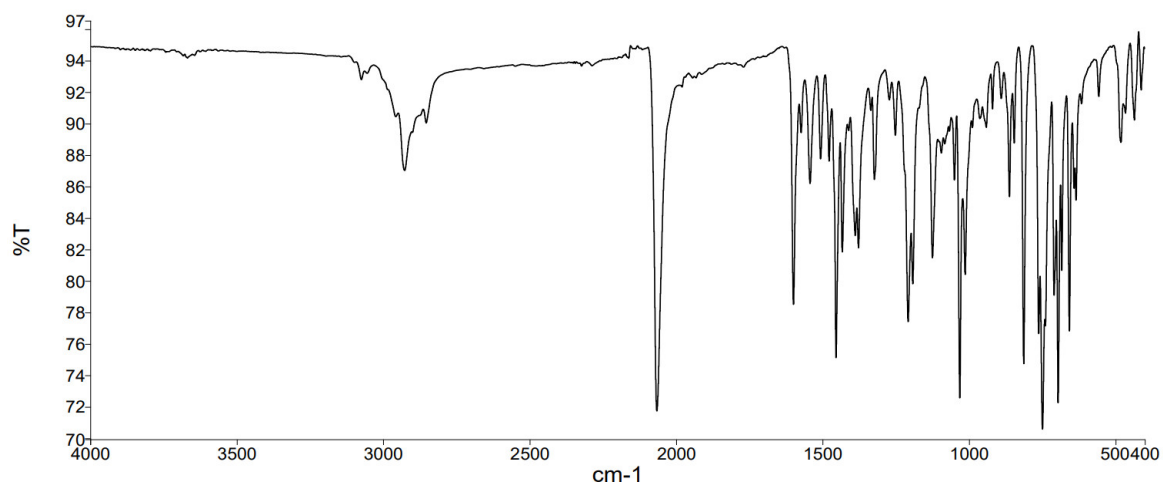

**Figure S10.** The solid-state FT-IR spectrum of  $[\text{Co}(\text{NCS})_2(\mathbf{6})]_n \cdot 3.8nC_6\text{H}_4\text{Cl}_2$ .

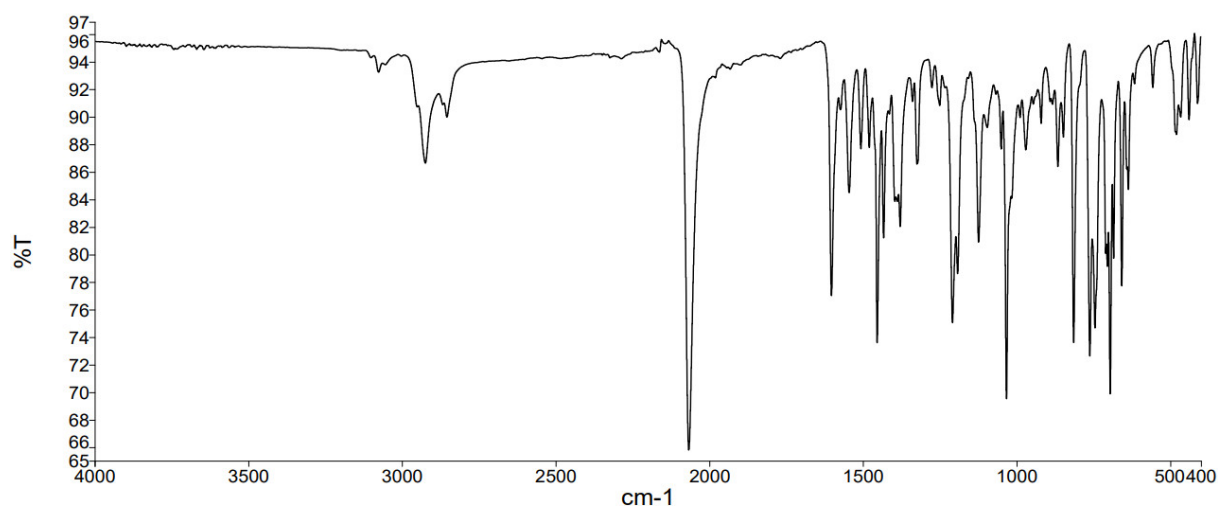

**Figure S11.** The solid-state FT-IR spectrum of  $[\text{Co}(\text{NCS})_2(\mathbf{7})]_n \cdot 3.1n\text{C}_6\text{H}_4\text{Cl}_2$ .

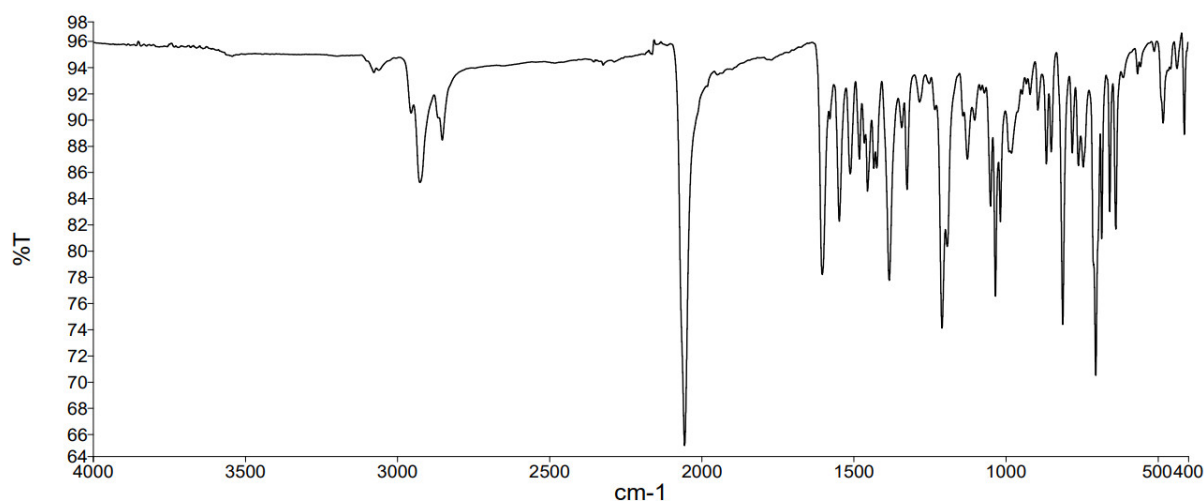

**Figure S12.** The solid-state FT-IR spectrum of  $[\text{Co}(\text{NCS})_2(\mathbf{8})]_n \cdot 1.6n\text{C}_6\text{H}_4\text{Cl}_2 \cdot 2n\text{MeOH}$ .

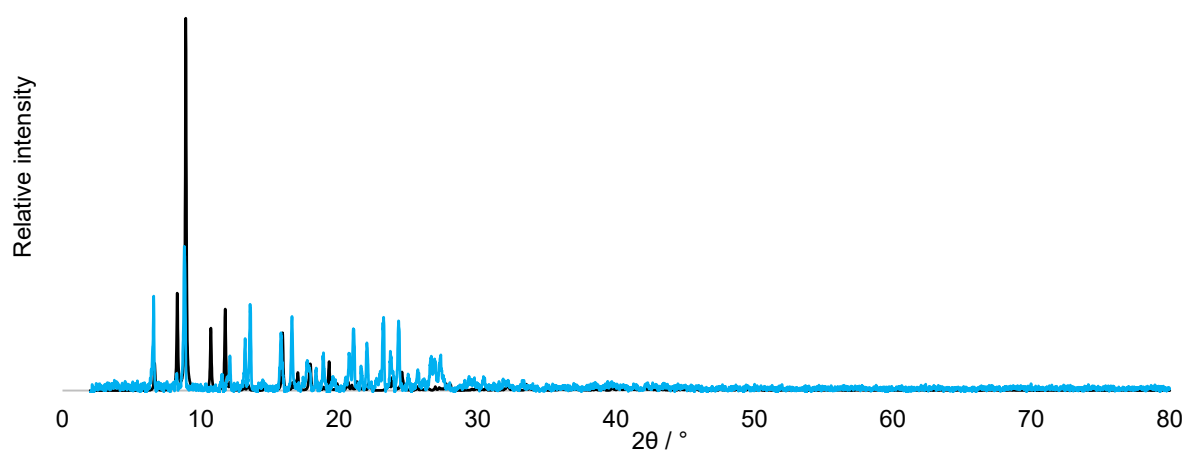

**Figure S13.** Overlay of the experimental (blue) PXRD (298 K) for the bulk material and that predicted (black) from the single crystal structure (150 K) of  $[\text{Co}(\text{NCS})_2(\mathbf{3})]_n \cdot 3.5n\text{C}_6\text{H}_4\text{Cl}_2$ .



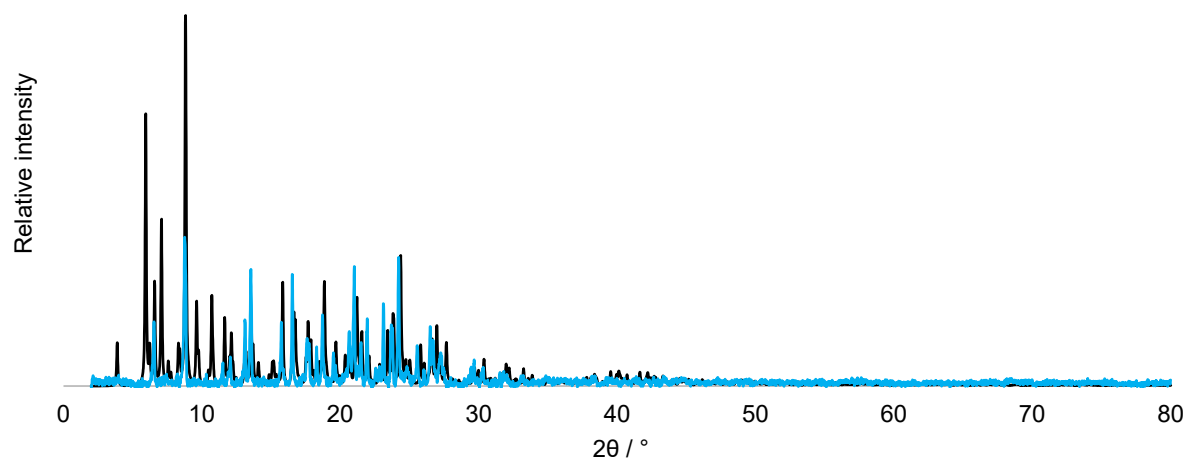

**Figure S14.** Overlay of the experimental (blue) PXRD (298 K) for the bulk material and that predicted (black) from the single crystal structure (150 K) of  $[\text{Co}(\text{NCS})_2(4)]_n \cdot 5.5n\text{C}_6\text{H}_4\text{Cl}_2$ .

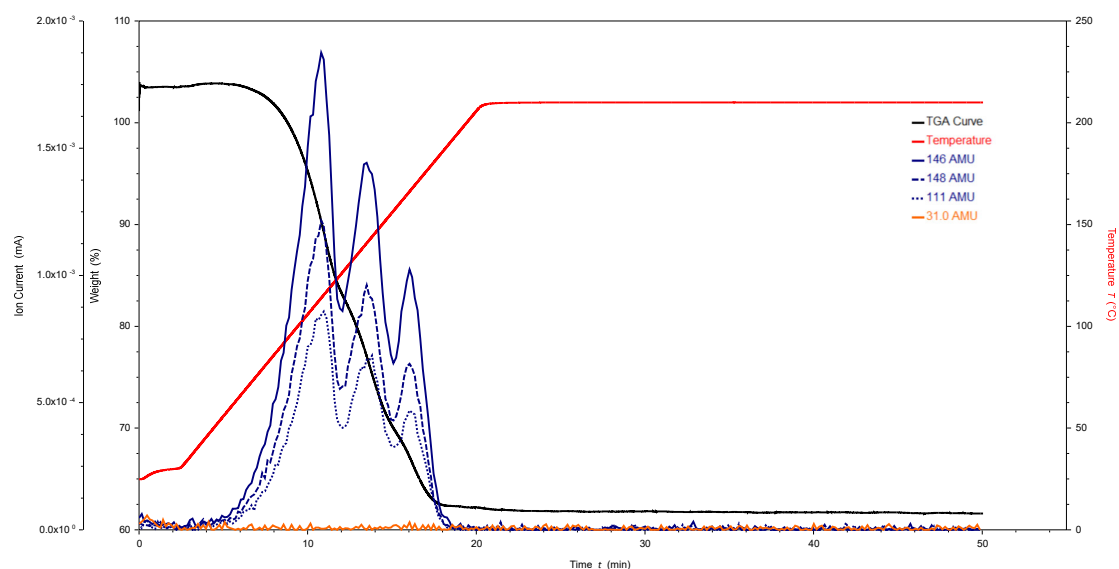

**Figure S15.** TGA and mass spectrometric traces for the analysis of  $[\text{Co}(\text{NCS})_2(3)]_n \cdot 3.5n\text{C}_6\text{H}_4\text{Cl}_2$ . Red: temperature vs. time; black: weight of sample vs. time; dark blue: mass detection for  $m/z$  146, 148 and 111; orange: mass detection for  $m/z$  31.0.

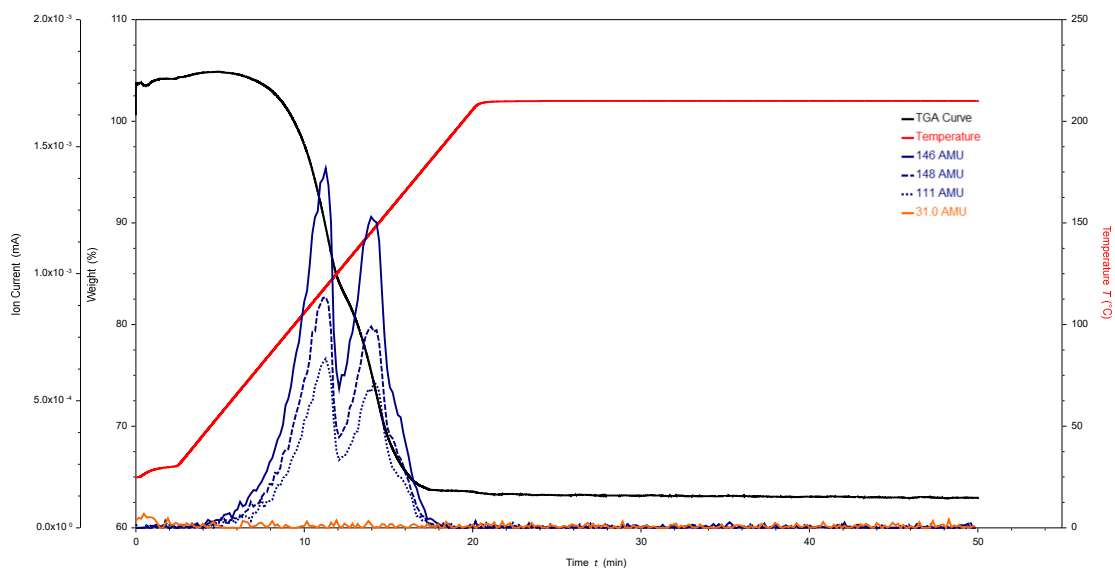

**Figure S16.** TGA and mass spectrometric traces for the analysis of  $[\text{Co}(\text{NCS})_2(\mathbf{4})]_n \cdot 5.5n\text{C}_6\text{H}_4\text{Cl}_2$ . Red: temperature vs. time; black: weight of sample vs. time; dark blue: mass detection for  $m/z$  146, 148 and 111; orange: mass detection for  $m/z$  31.0.

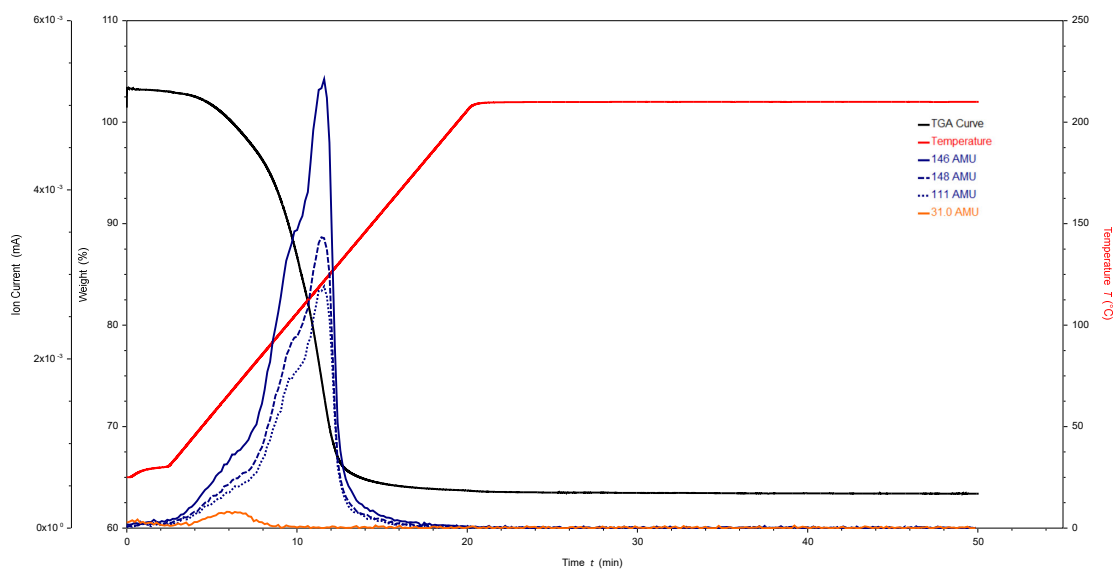

**Figure S17.** TGA and mass spectrometric traces for the analysis of  $[\text{Co}(\text{NCS})_2(\mathbf{6})]_n \cdot 3.8n\text{C}_6\text{H}_4\text{Cl}_2$ . Red: temperature vs. time; black: weight of sample vs. time; dark blue: mass detection for  $m/z$  146, 148 and 111; orange: mass detection for  $m/z$  31.0.
