# Supplementary material for: A Tail Does Not Always Make a Difference: Assembly of cds Nets from Co(NCS)2 and 1,4-bis(n-Alkyloxy)-2,5-bis(3,2′:6′,3″-terpyridin-4′-yl)benzene Ligands
Source: Molecules. 2022 Aug 5;27(15):4995. doi: 10.3390/molecules27154995 (PMC9370426; doi:10.3390/molecules27154995)
Supplement: Supplementary file 1 [file molecules-27-04995-s001.zip]

Archive with 14 entries (14 files):
- __MACOSX/._Supplementary Information.docx
- CAS_081_5_150K.cif
- __MACOSX/._CAS_081_5_150K.cif
- CAS_091_6_150K.cif
- __MACOSX/._CAS_091_6_150K.cif
- CAS_116_2_150K.cif
- __MACOSX/._CAS_116_2_150K.cif
- CAS_116_2b_150K.cif
- __MACOSX/._CAS_116_2b_150K.cif
- CAS_119_4_150K.cif
- __MACOSX/._CAS_119_4_150K.cif
- CAS113_6_150K.cif
- __MACOSX/._CAS113_6_150K.cif
- Supplementary Materials.pdf
