# Supplementary material for: A Tail Does Not Always Make a Difference: Assembly of cds Nets from Co(NCS)2 and 1,4-bis(n-Alkyloxy)-2,5-bis(3,2′:6′,3″-terpyridin-4′-yl)benzene Ligands
Source: Molecules. 2022 Aug 5;27(15):4995. doi: 10.3390/molecules27154995 (PMC9370426; doi:10.3390/molecules27154995)
Supplement: Supplementary file 1 [file molecules-27-04995-s001.zip › CAS113_6_150K.cif]

data_cas113_6_150k
_audit_creation_date               2021-12-15
_audit_creation_method
;
Olex2 1.5
(compiled 2021.12.09 svn.r5202d8cf for OlexSys, GUI svn.r6439)
;
_shelx_SHELXL_version_number       '2018/3'
loop_
  _audit_author_name
  _audit_author_email
  _audit_author_address
 'Capomolla, S.S.' simona.capomolla@unibas.ch
;
University of Basel
Department of Chemistry
Mattenstrasse 24a
Basel
Switzerland
;
 'Prescimone, A.' alessandro.prescimone@unibas.ch
;
University of Basel
Department of Chemistry
Mattenstrasse 24a
Basel
Switzerland
;

_audit_contact_author_address
;
University of Basel
Department of Chemistry
Mattenstrasse 24a
Basel
Switzerland
;
_audit_contact_author_email        alessandro.prescimone@unibas.ch
_audit_contact_author_name         'Prescimone, A.'
_audit_contact_author_phone        ''
_publ_contact_author_id_orcid      ''
_publ_section_references
;
Dolomanov, O.V., Bourhis, L.J., Gildea, R.J, Howard, J.A.K. & Puschmann, H.
 (2009), J. Appl. Cryst. 42, 339-341.

Sheldrick, G.M. (2015). Acta Cryst. A71, 3-8.

Sheldrick, G.M. (2015). Acta Cryst. C71, 3-8.
;
_chemical_name_common              ?
_chemical_name_systematic          ?
_chemical_formula_moiety           'C50 H48 Co N8 O2 S2, 3.8(C6 H4 Cl2)'
_chemical_formula_sum              'C72.80 H63.20 Cl7.60 Co N8 O2 S2'
_chemical_formula_weight           1474.58
_chemical_melting_point            ?
loop_
  _atom_type_symbol
  _atom_type_description
  _atom_type_scat_dispersion_real
  _atom_type_scat_dispersion_imag
  _atom_type_scat_source
 'C' 'C' 0.0137 0.0067 'International Tables Vol C Tables 4.2.6.8 and 6.1.1.4'
 'H' 'H' 0.0000 0.0000 'International Tables Vol C Tables 4.2.6.8 and 6.1.1.4'
 'Cl' 'Cl' 0.3281 0.5435 'International Tables Vol C Tables 4.2.6.8 and 6.1.1.4'
 'Co' 'Co' -0.6628 2.9049
 'International Tables Vol C Tables 4.2.6.8 and 6.1.1.4'
 'N' 'N' 0.0241 0.0134 'International Tables Vol C Tables 4.2.6.8 and 6.1.1.4'
 'O' 'O' 0.0389 0.0241 'International Tables Vol C Tables 4.2.6.8 and 6.1.1.4'
 'S' 'S' 0.2925 0.4295 'International Tables Vol C Tables 4.2.6.8 and 6.1.1.4'

_shelx_space_group_comment
;
The symmetry employed for this shelxl refinement is uniquely defined
by the following loop, which should always be used as a source of
symmetry information in preference to the above space-group names.
They are only intended as comments.
;
_space_group_crystal_system        'monoclinic'
_space_group_IT_number             14
_space_group_name_H-M_alt          'P 1 21/n 1'
_space_group_name_Hall             '-P 2yn'
loop_
  _space_group_symop_operation_xyz
 'x, y, z'
 '-x+1/2, y+1/2, -z+1/2'
 '-x, -y, -z'
 'x-1/2, -y-1/2, z-1/2'

_cell_length_a                     15.4135(4)
_cell_length_b                     14.3925(2)
_cell_length_c                     16.9214(4)
_cell_angle_alpha                  90
_cell_angle_beta                   112.398(2)
_cell_angle_gamma                  90
_cell_volume                       3470.63(14)
_cell_formula_units_Z              2
_cell_measurement_reflns_used      74913
_cell_measurement_temperature      150
_cell_measurement_theta_max        56.10
_cell_measurement_theta_min        2.46
_shelx_estimated_absorpt_T_max     0.751
_shelx_estimated_absorpt_T_min     0.518
_exptl_absorpt_coefficient_mu      3.791
_exptl_absorpt_correction_T_max    0.1644
_exptl_absorpt_correction_T_min    0.0383
_exptl_absorpt_correction_type     multi-scan
_exptl_absorpt_process_details
;
STOE X-Red32, absorption correction by Gaussian integration, analogous to
P. Coppens in: F. R. Ahmed (Editor), "Crystallographic Computing", Munksgaard,
Copenhagen (1970), 255 - 270. Afterwards scaling of reflection intensities was
performed within STOE LANA. J. Koziskova, F. Hahn, J. Richter, J. Kozisek, Acta
Chimica Slovaca, vol. 9, no. 2, 2016, pp. 136 - 140.
Finally a spherical absorption correction was done within STOE LANA.
;
_exptl_absorpt_special_details     ?
_exptl_crystal_colour              pink
_exptl_crystal_colour_primary      pink
_exptl_crystal_density_diffrn      1.411
_exptl_crystal_density_meas        ?
_exptl_crystal_density_method      ?
_exptl_crystal_description         block
_exptl_crystal_F_000               1520
loop_
  _exptl_crystal_face_index_h
  _exptl_crystal_face_index_k
  _exptl_crystal_face_index_l
  _exptl_crystal_face_perp_dist
 0 0 1 1.5771
 -17 -30 6 0.9790
 30 15 -28 0.2560
 -30 8 15 0.3348
 11 -30 5 0.5747
 1 2 -30 1.4841
 -10 -6 9 0.3476
 30 -13 -16 0.4802

_exptl_crystal_size_max            0.2
_exptl_crystal_size_mid            0.127
_exptl_crystal_size_min            0.08
_exptl_transmission_factor_max     ?
_exptl_transmission_factor_min     ?
_diffrn_reflns_av_R_equivalents    0.0371
_diffrn_reflns_av_unetI/netI       0.0265
_diffrn_reflns_Laue_measured_fraction_full  0.995
_diffrn_reflns_Laue_measured_fraction_max  0.986
_diffrn_reflns_limit_h_max         18
_diffrn_reflns_limit_h_min         -18
_diffrn_reflns_limit_k_max         16
_diffrn_reflns_limit_k_min         -17
_diffrn_reflns_limit_l_max         20
_diffrn_reflns_limit_l_min         -8
_diffrn_reflns_number              24990
_diffrn_reflns_point_group_measured_fraction_full  0.995
_diffrn_reflns_point_group_measured_fraction_max  0.986
_diffrn_reflns_theta_full          53.597
_diffrn_reflns_theta_max           55.545
_diffrn_reflns_theta_min           3.631
_diffrn_ambient_temperature        150
_diffrn_detector                   Pilatus300K
_diffrn_detector_area_resol_mean   5.81
_diffrn_detector_type              'DECTRIS PILATUS 300K'
_diffrn_measured_fraction_theta_full  0.995
_diffrn_measured_fraction_theta_max  0.986
_diffrn_measurement_device         'Eulerian 4-circle diffractometer'
_diffrn_measurement_device_type    'STOE STADIVARI'
_diffrn_measurement_method         'rotation method, \w scans'
_diffrn_radiation_collimation      '1.2 0.6 mm diameter'
_diffrn_radiation_monochromator    'Graded multilayer mirror'
_diffrn_radiation_polarisn_norm    0
_diffrn_radiation_probe            x-ray
_diffrn_radiation_type             GaK\a
_diffrn_radiation_wavelength       1.34143
_diffrn_source                     'Metaljet D2'
_diffrn_source_current             3.570
_diffrn_source_power               0.250
_diffrn_source_voltage             70
_reflns_Friedel_coverage           0.000
_reflns_Friedel_fraction_full      .
_reflns_Friedel_fraction_max       .
_reflns_number_gt                  6327
_reflns_number_total               6666
_reflns_special_details
;
 Reflections were merged by SHELXL according to the crystal
 class for the calculation of statistics and refinement.
 
 _reflns_Friedel_fraction is defined as the number of unique
 Friedel pairs measured divided by the number that would be
 possible theoretically, ignoring centric projections and
 systematic absences.
;
_reflns_threshold_expression       'I > 2\s(I)'
_computing_cell_refinement
;
X-Area Recipe 1.34.0.0 (STOE, 2019)
;
_computing_data_collection
;
X-Area Pilatus3_SV 1.31.154.0 (STOE, 2019)
;
_computing_data_reduction
;
X-Area Integrate 1.77.0.0 (STOE, 2019)
X-Area LANA 1.77.1.0 (STOE, 2019)
X-Area X-Red32 1.65.0.0 (STOE, 2018)
;
_computing_molecular_graphics      'Olex2 1.5 (Dolomanov et al., 2009)'
_computing_publication_material
;
STOE & Cie GmbH, X-Area, software package for collecting single-crystal or
multi-domain crystal data on STOE area-detector diffractometers, for image 
processing, for the correction and scaling of reflection intensities and 
for outlier rejection, version 1.88, Darmstadt 2019
;
_computing_structure_refinement    'SHELXL 2018/3 (Sheldrick, 2015)'
_computing_structure_solution      'SHELXT 2018/2 (Sheldrick, 2018)'
_refine_diff_density_max           0.869
_refine_diff_density_min           -0.871
_refine_diff_density_rms           0.089
_refine_ls_extinction_coef         .
_refine_ls_extinction_method       none
_refine_ls_goodness_of_fit_ref     1.050
_refine_ls_hydrogen_treatment      constr
_refine_ls_matrix_type             full
_refine_ls_number_parameters       496
_refine_ls_number_reflns           6666
_refine_ls_number_restraints       50
_refine_ls_R_factor_all            0.0603
_refine_ls_R_factor_gt             0.0578
_refine_ls_restrained_S_all        1.053
_refine_ls_shift/su_max            0.000
_refine_ls_shift/su_mean           0.000
_refine_ls_structure_factor_coef   Fsqd
_refine_ls_weighting_details      
 'w=1/[\s^2^(Fo^2^)+(0.0875P)^2^+4.3893P] where P=(Fo^2^+2Fc^2^)/3'
_refine_ls_weighting_scheme        calc
_refine_ls_wR_factor_gt            0.1523
_refine_ls_wR_factor_ref           0.1551
_refine_special_details
;
The aliphatic tail is orientationally disordered and so is one molecule 
of dichloro benzene
;
_olex2_refinement_description
;
1. Fixed Uiso
 At 1.2 times of:
  All C(H) groups, All C(H,H) groups, All C(H,H,H,H) groups
 At 1.5 times of:
  All C(H,H,H) groups
2. Restrained distances
 C24-C23
 1.5 with sigma of 0.005
 C23-C22 \\sim C22-C21 \\sim C21-C20 \\sim C20-C19
 with sigma of 0.02
 C45-C44 \\sim C24-C23
 with sigma of 0.02
 C44-C22 \\sim C23-C22
 with sigma of 0.02
3. Rigid bond restraints
 C44, C23, C24, C45
 with sigma for 1-2 distances of 0.01 and sigma for 1-3 distances of 0.01
4. Uiso/Uaniso restraints and constraints
C24 \\sim C23 \\sim C44 \\sim C45: within 2A with sigma of 0.04 and sigma for
terminal atoms of 0.08 within 2A
5. Others
 Fixed Sof: Cl6(0.5) Cl3(0.5) H22A(0.6) H22B(0.6) H22C(0.4) H22D(0.4) C32(0.5)
 C33(0.5) H33(0.5) C34(0.5) H34(0.5) C35(0.5) H35(0.5) C36(0.5) H36(0.5)
 C37(0.5) C23(0.6) H23A(0.6) H23B(0.6) C24(0.6) H24A(0.6) H24B(0.6) H24C(0.6)
 Cl2(0.4) Cl5(0.4) C39(0.4) C38(0.4) C43(0.4) H43(0.4) C42(0.4) H42(0.4)
 C41(0.4) H41(0.4) C40(0.4) H40(0.4) C44(0.4) H44A(0.4) H44B(0.4) C45(0.4)
 H45A(0.4) H45B(0.4) H45C(0.4)
6.a Riding coordinates:
 C22(H22C,H22D), C23(H23A,H23B), C24(H24A,H24B,H24C), C44(H44A,H44B), C45(H45A,
 H45B,H45C)
6.b Secondary CH2 refined with riding coordinates:
 C19(H19A,H19B), C20(H20A,H20B), C21(H21A,H21B), C22(H22A,H22B)
6.c Aromatic/amide H refined with riding coordinates:
 C18(H18), C5(H5), C12(H12), C15(H15), C7(H7), C10(H10), C1(H1), C16(H16),
 C17(H17), C3(H3), C2(H2), C28(H28), C31(H31), C30(H30), C29(H29), C33(H33),
 C34(H34), C35(H35), C36(H36), C43(H43), C42(H42), C41(H41), C40(H40)
6.d Fitted hexagon refined as free rotating group:
 C32(C33,C34,C35,C36,C37), C39(C38,C43,C42,C41,C40)
;
_atom_sites_solution_hydrogens     mixed
_atom_sites_solution_primary       dual
_atom_sites_solution_secondary     ?
loop_
  _atom_site_label
  _atom_site_type_symbol
  _atom_site_fract_x
  _atom_site_fract_y
  _atom_site_fract_z
  _atom_site_U_iso_or_equiv
  _atom_site_adp_type
  _atom_site_occupancy
  _atom_site_site_symmetry_order
  _atom_site_calc_flag
  _atom_site_refinement_flags_posn
  _atom_site_refinement_flags_adp
  _atom_site_refinement_flags_occupancy
  _atom_site_disorder_assembly
  _atom_site_disorder_group
 Co1 Co 0.500000 0.500000 0.500000 0.01675(14) Uani 1 2 d S . P . .
 S1 S 0.40261(6) 0.36474(5) 0.22559(4) 0.0411(2) Uani 1 1 d . . . . .
 Cl1 Cl 0.83216(9) 0.53204(9) 1.03111(10) 0.0851(4) Uani 1 1 d . . . . .
 Cl4 Cl 0.95786(10) 0.34907(12) 1.08665(10) 0.0964(4) Uani 1 1 d . . . . .
 O1 O 0.53793(14) 0.68800(12) 1.00267(13) 0.0309(4) Uani 1 1 d . . . . .
 N3 N 0.87158(13) 0.04537(13) 1.02212(12) 0.0198(4) Uani 1 1 d . . . . .
 N1 N 0.58043(14) 0.39226(14) 0.58871(12) 0.0211(4) Uani 1 1 d . . . . .
 N2 N 0.68844(14) 0.24363(14) 0.86415(12) 0.0228(4) Uani 1 1 d . . . . .
 N4 N 0.46791(14) 0.40869(14) 0.39883(12) 0.0220(4) Uani 1 1 d . . . . .
 Cl6 Cl 0.13732(16) 0.27976(17) 0.83250(13) 0.0749(6) Uani 0.5 1 d . . P A 1
 Cl3 Cl 0.3158(3) 0.35555(17) 0.79996(14) 0.0971(11) Uani 0.5 1 d . . P A 1
 C18 C 0.84565(18) 0.00521(16) 1.08195(17) 0.0241(5) Uani 1 1 d . . . . .
 H18 H 0.881338 -0.045957 1.113158 0.029 Uiso 1 1 calc R U . . .
 C13 C 0.68872(17) 0.23271(16) 0.94335(15) 0.0225(5) Uani 1 1 d . . . . .
 C11 C 0.52066(18) 0.59471(17) 0.99988(15) 0.0235(5) Uani 1 1 d . . . . .
 C14 C 0.74239(17) 0.15241(16) 0.99308(15) 0.0221(5) Uani 1 1 d . . . . .
 C5 C 0.58292(17) 0.38463(16) 0.66894(15) 0.0216(5) Uani 1 1 d . . . . .
 H5 H 0.544214 0.424946 0.685735 0.026 Uiso 1 1 calc R U . . .
 C9 C 0.54423(17) 0.43512(16) 0.96577(15) 0.0227(5) Uani 1 1 d . . . . .
 C12 C 0.64054(17) 0.29177(17) 0.97696(15) 0.0238(5) Uani 1 1 d . . . . .
 H12 H 0.640033 0.280106 1.032044 0.029 Uiso 1 1 calc R U . . .
 C15 C 0.81976(17) 0.11760(16) 0.97917(15) 0.0218(5) Uani 1 1 d . . . . .
 H15 H 0.836861 0.146686 0.936811 0.026 Uiso 1 1 calc R U . . .
 C25 C 0.44012(17) 0.38918(16) 0.32667(16) 0.0232(5) Uani 1 1 d . . . . .
 C8 C 0.59304(17) 0.36797(16) 0.93009(15) 0.0225(5) Uani 1 1 d . . . . .
 C7 C 0.59443(17) 0.38041(17) 0.84872(15) 0.0244(5) Uani 1 1 d . . . . .
 H7 H 0.564153 0.432507 0.815014 0.029 Uiso 1 1 calc R U . . .
 C10 C 0.56388(17) 0.52972(17) 0.96598(15) 0.0238(5) Uani 1 1 d . . . . .
 H10 H 0.607607 0.550229 0.942546 0.029 Uiso 1 1 calc R U . . .
 C1 C 0.63414(19) 0.33414(18) 0.56563(16) 0.0283(5) Uani 1 1 d . . . . .
 H1 H 0.632662 0.338130 0.509088 0.034 Uiso 1 1 calc R U . . .
 C16 C 0.71812(18) 0.10948(17) 1.05558(16) 0.0256(5) Uani 1 1 d . . . . .
 H16 H 0.666295 0.131434 1.067562 0.031 Uiso 1 1 calc R U . . .
 C17 C 0.77026(18) 0.03461(18) 1.09998(16) 0.0275(5) Uani 1 1 d . . . . .
 H17 H 0.754274 0.003930 1.142280 0.033 Uiso 1 1 calc R U . . .
 C6 C 0.64060(17) 0.31576(17) 0.81745(15) 0.0226(5) Uani 1 1 d . . . . .
 C4 C 0.63891(17) 0.32112(17) 0.72855(15) 0.0232(5) Uani 1 1 d . . . . .
 C3 C 0.6943(2) 0.2624(2) 0.70278(17) 0.0331(6) Uani 1 1 d . . . . .
 H3 H 0.733934 0.218076 0.741442 0.040 Uiso 1 1 calc R U . . .
 C2 C 0.6915(2) 0.2687(2) 0.61997(18) 0.0368(6) Uani 1 1 d . . . . .
 H2 H 0.728640 0.228563 0.601109 0.044 Uiso 1 1 calc R U . . .
 C19 C 0.6188(2) 0.71867(18) 0.98752(19) 0.0321(6) Uani 1 1 d D . . . .
 H19A H 0.607263 0.713474 0.925994 0.039 Uiso 1 1 calc R U . . .
 H19B H 0.673841 0.679892 1.020204 0.039 Uiso 1 1 calc R U . . .
 C20 C 0.6369(2) 0.8190(2) 1.0161(2) 0.0423(7) Uani 1 1 d D . . . .
 H20A H 0.644328 0.822513 1.076736 0.051 Uiso 1 1 calc R U . . .
 H20B H 0.697129 0.838356 1.012991 0.051 Uiso 1 1 calc R U . . .
 C21 C 0.5624(2) 0.8875(2) 0.9658(3) 0.0529(9) Uani 1 1 d D . . . .
 H21A H 0.575426 0.947937 0.996009 0.064 Uiso 1 1 calc R U . . .
 H21B H 0.500799 0.865329 0.963820 0.064 Uiso 1 1 calc R U . . .
 C27 C 0.9151(3) 0.3878(3) 0.9827(3) 0.0608(10) Uani 1 1 d . . . . .
 C26 C 0.8599(3) 0.4671(3) 0.9588(3) 0.0586(10) Uani 1 1 d . . . . .
 C28 C 0.9365(3) 0.3385(3) 0.9233(4) 0.0682(12) Uani 1 1 d . . . . .
 H28 H 0.974449 0.284366 0.939910 0.082 Uiso 1 1 calc R U . . .
 C31 C 0.8255(3) 0.4956(3) 0.8747(4) 0.0719(13) Uani 1 1 d . . . . .
 H31 H 0.786790 0.549189 0.857689 0.086 Uiso 1 1 calc R U . . .
 C30 C 0.8477(4) 0.4454(4) 0.8150(4) 0.0810(14) Uani 1 1 d . . . . .
 H30 H 0.824821 0.464700 0.756897 0.097 Uiso 1 1 calc R U . . .
 C29 C 0.9034(4) 0.3672(3) 0.8405(4) 0.0787(14) Uani 1 1 d . . . . .
 H29 H 0.918839 0.332985 0.799643 0.094 Uiso 1 1 calc R U . . .
 C22 C 0.5564(5) 0.9021(5) 0.8752(4) 0.109(2) Uani 1 1 d D . . . .
 H22A H 0.544316 0.840769 0.846573 0.131 Uiso 0.6 1 calc R U P B 1
 H22B H 0.619108 0.922535 0.878711 0.131 Uiso 0.6 1 calc R U P B 1
 H22C H 0.515809 0.857442 0.835198 0.131 Uiso 0.4 1 d R U P C 2
 H22D H 0.617469 0.901912 0.871058 0.131 Uiso 0.4 1 d R U P C 2
 C32 C 0.1827(7) 0.2232(6) 0.7662(4) 0.046(2) Uani 0.5 1 d G . P A 1
 C33 C 0.1402(4) 0.1404(8) 0.7288(5) 0.040(2) Uani 0.5 1 d G . P A 1
 H33 H 0.085328 0.119522 0.736256 0.048 Uiso 0.5 1 calc R U P A 1
 C34 C 0.1779(7) 0.0883(4) 0.6804(4) 0.049(3) Uani 0.5 1 d G . P A 1
 H34 H 0.148790 0.031816 0.654833 0.058 Uiso 0.5 1 calc R U P A 1
 C35 C 0.2581(7) 0.1190(7) 0.6695(4) 0.052(2) Uani 0.5 1 d G . P A 1
 H35 H 0.283873 0.083354 0.636454 0.062 Uiso 0.5 1 calc R U P A 1
 C36 C 0.3007(3) 0.2017(8) 0.7070(5) 0.050(3) Uani 0.5 1 d G . P A 1
 H36 H 0.355495 0.222599 0.699496 0.060 Uiso 0.5 1 calc R U P A 1
 C37 C 0.2630(7) 0.2538(4) 0.7553(4) 0.044(2) Uani 0.5 1 d G . P A 1
 C23 C 0.4834(5) 0.9711(4) 0.8159(5) 0.0618(19) Uani 0.6 1 d D U P D 1
 H23A H 0.455985 0.954736 0.755839 0.074 Uiso 0.6 1 d R U P D 1
 H23B H 0.434515 0.974026 0.838759 0.074 Uiso 0.6 1 d R U P D 1
 C24 C 0.5228(6) 1.0666(5) 0.8426(5) 0.067(2) Uani 0.6 1 d D U P D 1
 H24A H 0.549468 1.085776 0.901365 0.101 Uiso 0.6 1 d R U P D 1
 H24B H 0.570678 1.066686 0.819295 0.101 Uiso 0.6 1 d R U P D 1
 H24C H 0.473778 1.108896 0.810805 0.101 Uiso 0.6 1 d R U P D 1
 Cl2 Cl 0.38872(18) 0.3006(2) 0.7572(2) 0.0843(10) Uani 0.4 1 d . . P E 2
 Cl5 Cl 0.2139(3) 0.3689(2) 0.7948(2) 0.0982(11) Uani 0.4 1 d . . P E 2
 C39 C 0.2912(5) 0.2336(8) 0.7327(6) 0.038(3) Uani 0.4 1 d G . P E 2
 C38 C 0.2160(9) 0.2612(5) 0.7534(5) 0.048(3) Uani 0.4 1 d G . P E 2
 C43 C 0.1399(6) 0.2021(9) 0.7376(6) 0.051(3) Uani 0.4 1 d G . P E 2
 H43 H 0.088523 0.221009 0.751792 0.061 Uiso 0.4 1 calc R U P E 2
 C42 C 0.1389(6) 0.1154(7) 0.7012(7) 0.046(4) Uani 0.4 1 d G . P E 2
 H42 H 0.086914 0.075005 0.690408 0.055 Uiso 0.4 1 calc R U P E 2
 C41 C 0.2141(9) 0.0877(6) 0.6805(6) 0.069(5) Uani 0.4 1 d G . P E 2
 H41 H 0.213433 0.028469 0.655561 0.083 Uiso 0.4 1 calc R U P E 2
 C40 C 0.2902(6) 0.1468(10) 0.6962(6) 0.050(3) Uani 0.4 1 d G . P E 2
 H40 H 0.341563 0.127937 0.682095 0.060 Uiso 0.4 1 calc R U P E 2
 C44 C 0.5111(10) 1.0041(8) 0.8623(9) 0.077(3) Uani 0.4 1 d D U P D 2
 H44A H 0.543936 1.041018 0.912816 0.092 Uiso 0.4 1 d R U P D 2
 H44B H 0.445316 0.999628 0.853596 0.092 Uiso 0.4 1 d R U P D 2
 C45 C 0.5199(13) 1.0484(13) 0.7864(12) 0.110(5) Uani 0.4 1 d D U P D 2
 H45A H 0.585257 1.052011 0.795518 0.165 Uiso 0.4 1 d R U P D 2
 H45B H 0.487667 1.011041 0.736908 0.165 Uiso 0.4 1 d R U P D 2
 H45C H 0.493507 1.109781 0.777748 0.165 Uiso 0.4 1 d R U P D 2

loop_
  _atom_site_aniso_label
  _atom_site_aniso_U_11
  _atom_site_aniso_U_22
  _atom_site_aniso_U_33
  _atom_site_aniso_U_23
  _atom_site_aniso_U_13
  _atom_site_aniso_U_12
 Co1 0.0221(2) 0.0157(2) 0.0114(2) -0.00093(15) 0.00525(18) -0.00278(16)
 S1 0.0586(5) 0.0444(4) 0.0189(3) -0.0084(3) 0.0131(3) -0.0156(3)
 Cl1 0.0755(7) 0.0783(7) 0.1110(10) -0.0315(7) 0.0461(7) 0.0111(6)
 Cl4 0.0862(8) 0.1064(10) 0.1036(10) 0.0174(8) 0.0439(8) 0.0275(7)
 O1 0.0414(10) 0.0185(8) 0.0424(11) -0.0011(7) 0.0267(9) 0.0022(7)
 N3 0.0240(9) 0.0204(9) 0.0146(9) 0.0018(7) 0.0069(7) 0.0038(7)
 N1 0.0252(9) 0.0214(9) 0.0168(9) 0.0010(7) 0.0080(8) 0.0009(7)
 N2 0.0280(10) 0.0236(10) 0.0185(9) 0.0036(8) 0.0107(8) 0.0070(8)
 N4 0.0273(10) 0.0217(9) 0.0170(10) -0.0031(8) 0.0083(8) -0.0048(8)
 Cl6 0.0799(13) 0.0841(15) 0.0491(10) -0.0154(10) 0.0115(9) 0.0302(11)
 Cl3 0.152(3) 0.0629(13) 0.0421(10) 0.0055(9) -0.0017(13) -0.0433(15)
 C18 0.0278(12) 0.0213(12) 0.0217(12) 0.0039(9) 0.0077(10) 0.0042(9)
 C13 0.0278(11) 0.0214(11) 0.0194(11) 0.0031(9) 0.0103(9) 0.0044(9)
 C11 0.0312(12) 0.0198(11) 0.0210(11) 0.0023(9) 0.0116(9) 0.0051(9)
 C14 0.0279(11) 0.0206(11) 0.0178(11) 0.0009(9) 0.0088(9) 0.0055(9)
 C5 0.0283(11) 0.0203(11) 0.0185(11) 0.0019(9) 0.0115(9) 0.0035(9)
 C9 0.0295(12) 0.0219(11) 0.0182(11) 0.0032(9) 0.0109(9) 0.0068(9)
 C12 0.0322(12) 0.0243(12) 0.0173(11) 0.0036(9) 0.0119(9) 0.0057(10)
 C15 0.0291(12) 0.0194(11) 0.0182(11) 0.0027(9) 0.0105(9) 0.0051(9)
 C25 0.0268(11) 0.0195(11) 0.0239(13) -0.0009(9) 0.0105(10) -0.0055(9)
 C8 0.0300(12) 0.0209(11) 0.0191(11) 0.0013(9) 0.0121(9) 0.0055(9)
 C7 0.0308(12) 0.0225(11) 0.0213(12) 0.0057(9) 0.0114(10) 0.0088(9)
 C10 0.0303(12) 0.0229(12) 0.0208(11) 0.0026(9) 0.0125(10) 0.0052(10)
 C1 0.0381(13) 0.0306(13) 0.0189(11) 0.0029(10) 0.0140(10) 0.0066(11)
 C16 0.0302(12) 0.0265(12) 0.0232(12) 0.0033(9) 0.0137(10) 0.0066(10)
 C17 0.0340(13) 0.0282(13) 0.0234(12) 0.0076(10) 0.0145(10) 0.0057(10)
 C6 0.0295(12) 0.0225(11) 0.0177(11) 0.0025(9) 0.0111(9) 0.0046(9)
 C4 0.0300(12) 0.0238(11) 0.0177(11) 0.0024(9) 0.0112(9) 0.0047(9)
 C3 0.0441(15) 0.0347(14) 0.0242(13) 0.0087(11) 0.0170(11) 0.0190(12)
 C2 0.0499(16) 0.0421(16) 0.0251(13) 0.0068(11) 0.0217(12) 0.0205(13)
 C19 0.0375(14) 0.0266(13) 0.0373(15) -0.0024(11) 0.0198(12) -0.0003(11)
 C20 0.0418(16) 0.0302(15) 0.0570(19) -0.0075(13) 0.0212(14) -0.0041(12)
 C21 0.0471(18) 0.0310(16) 0.084(3) 0.0004(16) 0.0292(18) -0.0012(13)
 C27 0.0466(19) 0.047(2) 0.093(3) -0.012(2) 0.032(2) -0.0041(16)
 C26 0.0436(18) 0.0428(19) 0.092(3) -0.019(2) 0.028(2) -0.0058(15)
 C28 0.060(2) 0.043(2) 0.107(4) -0.015(2) 0.039(2) -0.0013(17)
 C31 0.058(2) 0.051(2) 0.100(4) -0.012(2) 0.024(3) -0.0010(17)
 C30 0.082(3) 0.072(3) 0.086(3) -0.015(3) 0.028(3) -0.009(2)
 C29 0.078(3) 0.061(3) 0.106(4) -0.032(3) 0.044(3) -0.008(2)
 C22 0.109(4) 0.115(5) 0.124(5) 0.075(4) 0.068(4) 0.057(4)
 C32 0.042(5) 0.054(6) 0.031(4) -0.006(4) 0.002(4) 0.008(5)
 C33 0.041(4) 0.049(6) 0.021(5) -0.001(4) 0.000(3) 0.002(4)
 C34 0.074(8) 0.038(5) 0.023(4) 0.001(3) 0.007(4) 0.007(4)
 C35 0.063(6) 0.048(6) 0.041(5) 0.007(5) 0.015(5) 0.009(5)
 C36 0.045(4) 0.066(8) 0.034(5) 0.000(5) 0.011(4) 0.007(5)
 C37 0.049(7) 0.050(5) 0.027(4) 0.011(3) 0.006(4) -0.004(5)
 C23 0.064(4) 0.049(4) 0.043(3) 0.000(3) -0.013(3) -0.008(3)
 C24 0.078(5) 0.052(4) 0.050(4) -0.002(4) 0.001(4) -0.009(3)
 Cl2 0.0535(13) 0.0904(19) 0.0756(17) 0.0315(15) -0.0127(12) -0.0369(13)
 Cl5 0.134(3) 0.0624(17) 0.080(2) -0.0089(15) 0.021(2) -0.0082(19)
 C39 0.032(5) 0.051(7) 0.026(6) 0.010(5) 0.004(4) -0.009(4)
 C38 0.045(7) 0.052(6) 0.035(5) 0.003(4) 0.002(5) -0.021(6)
 C43 0.044(6) 0.053(7) 0.047(6) 0.007(6) 0.008(5) -0.017(6)
 C42 0.058(7) 0.053(8) 0.012(6) 0.001(5) -0.004(4) -0.025(6)
 C41 0.095(13) 0.053(8) 0.033(7) 0.007(5) -0.005(6) -0.020(7)
 C40 0.051(6) 0.062(9) 0.030(6) -0.002(6) 0.007(5) -0.009(6)
 C44 0.073(8) 0.071(9) 0.076(9) -0.004(7) 0.018(7) -0.017(6)
 C45 0.105(11) 0.098(12) 0.104(12) 0.047(10) 0.014(10) 0.008(9)

_geom_special_details
;
 All esds (except the esd in the dihedral angle between two l.s. planes)
 are estimated using the full covariance matrix.  The cell esds are taken
 into account individually in the estimation of esds in distances, angles
 and torsion angles; correlations between esds in cell parameters are only
 used when they are defined by crystal symmetry.  An approximate (isotropic)
 treatment of cell esds is used for estimating esds involving l.s. planes.
;
loop_
  _geom_bond_atom_site_label_1
  _geom_bond_atom_site_label_2
  _geom_bond_distance
  _geom_bond_site_symmetry_2
  _geom_bond_publ_flag
 Co1 N3 2.2469(19) 4_565 ?
 Co1 N3 2.2469(19) 2_656 ?
 Co1 N1 2.1854(19) 3_666 ?
 Co1 N1 2.1855(19) . ?
 Co1 N4 2.0633(19) . ?
 Co1 N4 2.0633(19) 3_666 ?
 S1 C25 1.622(2) . ?
 Cl1 C26 1.719(4) . ?
 Cl4 C27 1.720(5) . ?
 O1 C11 1.366(3) . ?
 O1 C19 1.434(3) . ?
 N3 C18 1.352(3) . ?
 N3 C15 1.343(3) . ?
 N1 C5 1.348(3) . ?
 N1 C1 1.336(3) . ?
 N2 C13 1.348(3) . ?
 N2 C6 1.342(3) . ?
 N4 C25 1.164(3) . ?
 Cl6 C32 1.734(5) . ?
 Cl3 C37 1.706(5) . ?
 C18 H18 0.9500 . ?
 C18 C17 1.376(4) . ?
 C13 C14 1.482(3) . ?
 C13 C12 1.385(3) . ?
 C11 C9 1.402(3) 3_667 ?
 C11 C10 1.392(3) . ?
 C14 C15 1.394(3) . ?
 C14 C16 1.393(3) . ?
 C5 H5 0.9500 . ?
 C5 C4 1.391(3) . ?
 C9 C8 1.487(3) . ?
 C9 C10 1.395(3) . ?
 C12 H12 0.9500 . ?
 C12 C8 1.388(3) . ?
 C15 H15 0.9500 . ?
 C8 C7 1.397(3) . ?
 C7 H7 0.9500 . ?
 C7 C6 1.393(3) . ?
 C10 H10 0.9500 . ?
 C1 H1 0.9500 . ?
 C1 C2 1.376(4) . ?
 C16 H16 0.9500 . ?
 C16 C17 1.383(3) . ?
 C17 H17 0.9500 . ?
 C6 C4 1.497(3) . ?
 C4 C3 1.385(3) . ?
 C3 H3 0.9500 . ?
 C3 C2 1.388(4) . ?
 C2 H2 0.9500 . ?
 C19 H19A 0.9900 . ?
 C19 H19B 0.9900 . ?
 C19 C20 1.514(4) . ?
 C20 H20A 0.9900 . ?
 C20 H20B 0.9900 . ?
 C20 C21 1.506(5) . ?
 C21 H21A 0.9900 . ?
 C21 H21B 0.9900 . ?
 C21 C22 1.514(6) . ?
 C27 C26 1.388(6) . ?
 C27 C28 1.370(6) . ?
 C26 C31 1.378(7) . ?
 C28 H28 0.9500 . ?
 C28 C29 1.360(8) . ?
 C31 H31 0.9500 . ?
 C31 C30 1.387(7) . ?
 C30 H30 0.9500 . ?
 C30 C29 1.381(7) . ?
 C29 H29 0.9500 . ?
 C22 H22A 0.9900 . ?
 C22 H22B 0.9900 . ?
 C22 H22C 0.9699 . ?
 C22 H22D 0.9700 . ?
 C22 C23 1.549(7) . ?
 C22 C44 1.604(11) . ?
 C32 C33 1.3900 . ?
 C32 C37 1.3900 . ?
 C33 H33 0.9500 . ?
 C33 C34 1.3900 . ?
 C34 H34 0.9500 . ?
 C34 C35 1.3900 . ?
 C35 H35 0.9500 . ?
 C35 C36 1.3900 . ?
 C36 H36 0.9500 . ?
 C36 C37 1.3900 . ?
 C23 H23A 0.9701 . ?
 C23 H23B 0.9700 . ?
 C23 C24 1.501(4) . ?
 C24 H24A 0.9601 . ?
 C24 H24B 0.9598 . ?
 C24 H24C 0.9599 . ?
 Cl2 C39 1.700(5) . ?
 Cl5 C38 1.707(7) . ?
 C39 C38 1.3900 . ?
 C39 C40 1.3900 . ?
 C38 C43 1.3900 . ?
 C43 H43 0.9500 . ?
 C43 C42 1.3900 . ?
 C42 H42 0.9500 . ?
 C42 C41 1.3900 . ?
 C41 H41 0.9500 . ?
 C41 C40 1.3900 . ?
 C40 H40 0.9500 . ?
 C44 H44A 0.9701 . ?
 C44 H44B 0.9700 . ?
 C44 C45 1.485(15) . ?
 C45 H45A 0.9600 . ?
 C45 H45B 0.9599 . ?
 C45 H45C 0.9600 . ?

loop_
  _geom_angle_atom_site_label_1
  _geom_angle_atom_site_label_2
  _geom_angle_atom_site_label_3
  _geom_angle
  _geom_angle_site_symmetry_1
  _geom_angle_site_symmetry_3
  _geom_angle_publ_flag
 N3 Co1 N3 180.0 4_565 2_656 ?
 N1 Co1 N3 90.88(7) . 2_656 ?
 N1 Co1 N3 90.88(7) 3_666 4_565 ?
 N1 Co1 N3 89.12(7) 3_666 2_656 ?
 N1 Co1 N3 89.12(7) . 4_565 ?
 N1 Co1 N1 180.00(10) 3_666 . ?
 N4 Co1 N3 89.70(7) . 2_656 ?
 N4 Co1 N3 90.30(7) . 4_565 ?
 N4 Co1 N3 89.70(7) 3_666 4_565 ?
 N4 Co1 N3 90.30(7) 3_666 2_656 ?
 N4 Co1 N1 89.32(8) . 3_666 ?
 N4 Co1 N1 89.32(8) 3_666 . ?
 N4 Co1 N1 90.68(8) 3_666 3_666 ?
 N4 Co1 N1 90.68(8) . . ?
 N4 Co1 N4 180.0 . 3_666 ?
 C11 O1 C19 117.88(19) . . ?
 C18 N3 Co1 122.08(15) . 2_646 ?
 C15 N3 Co1 120.98(15) . 2_646 ?
 C15 N3 C18 116.8(2) . . ?
 C5 N1 Co1 122.72(15) . . ?
 C1 N1 Co1 119.74(16) . . ?
 C1 N1 C5 117.4(2) . . ?
 C6 N2 C13 117.9(2) . . ?
 C25 N4 Co1 154.18(19) . . ?
 N3 C18 H18 118.3 . . ?
 N3 C18 C17 123.4(2) . . ?
 C17 C18 H18 118.3 . . ?
 N2 C13 C14 116.4(2) . . ?
 N2 C13 C12 122.5(2) . . ?
 C12 C13 C14 121.0(2) . . ?
 O1 C11 C9 116.6(2) . 3_667 ?
 O1 C11 C10 123.8(2) . . ?
 C10 C11 C9 119.6(2) . 3_667 ?
 C15 C14 C13 120.8(2) . . ?
 C16 C14 C13 121.6(2) . . ?
 C16 C14 C15 117.6(2) . . ?
 N1 C5 H5 118.1 . . ?
 N1 C5 C4 123.8(2) . . ?
 C4 C5 H5 118.1 . . ?
 C11 C9 C8 121.4(2) 3_667 . ?
 C10 C9 C11 119.1(2) . 3_667 ?
 C10 C9 C8 119.5(2) . . ?
 C13 C12 H12 120.0 . . ?
 C13 C12 C8 119.9(2) . . ?
 C8 C12 H12 120.0 . . ?
 N3 C15 C14 123.9(2) . . ?
 N3 C15 H15 118.1 . . ?
 C14 C15 H15 118.1 . . ?
 N4 C25 S1 178.4(2) . . ?
 C12 C8 C9 121.3(2) . . ?
 C12 C8 C7 117.5(2) . . ?
 C7 C8 C9 121.1(2) . . ?
 C8 C7 H7 120.3 . . ?
 C6 C7 C8 119.4(2) . . ?
 C6 C7 H7 120.3 . . ?
 C11 C10 C9 121.3(2) . . ?
 C11 C10 H10 119.4 . . ?
 C9 C10 H10 119.4 . . ?
 N1 C1 H1 118.5 . . ?
 N1 C1 C2 123.0(2) . . ?
 C2 C1 H1 118.5 . . ?
 C14 C16 H16 120.3 . . ?
 C17 C16 C14 119.3(2) . . ?
 C17 C16 H16 120.3 . . ?
 C18 C17 C16 119.0(2) . . ?
 C18 C17 H17 120.5 . . ?
 C16 C17 H17 120.5 . . ?
 N2 C6 C7 122.6(2) . . ?
 N2 C6 C4 115.3(2) . . ?
 C7 C6 C4 122.1(2) . . ?
 C5 C4 C6 122.1(2) . . ?
 C3 C4 C5 117.4(2) . . ?
 C3 C4 C6 120.6(2) . . ?
 C4 C3 H3 120.3 . . ?
 C4 C3 C2 119.4(2) . . ?
 C2 C3 H3 120.3 . . ?
 C1 C2 C3 119.0(2) . . ?
 C1 C2 H2 120.5 . . ?
 C3 C2 H2 120.5 . . ?
 O1 C19 H19A 110.2 . . ?
 O1 C19 H19B 110.2 . . ?
 O1 C19 C20 107.7(2) . . ?
 H19A C19 H19B 108.5 . . ?
 C20 C19 H19A 110.2 . . ?
 C20 C19 H19B 110.2 . . ?
 C19 C20 H20A 108.3 . . ?
 C19 C20 H20B 108.3 . . ?
 H20A C20 H20B 107.4 . . ?
 C21 C20 C19 115.9(3) . . ?
 C21 C20 H20A 108.3 . . ?
 C21 C20 H20B 108.3 . . ?
 C20 C21 H21A 108.8 . . ?
 C20 C21 H21B 108.8 . . ?
 C20 C21 C22 113.7(3) . . ?
 H21A C21 H21B 107.7 . . ?
 C22 C21 H21A 108.8 . . ?
 C22 C21 H21B 108.8 . . ?
 C26 C27 Cl4 121.2(3) . . ?
 C28 C27 Cl4 118.5(4) . . ?
 C28 C27 C26 120.3(5) . . ?
 C27 C26 Cl1 122.0(4) . . ?
 C31 C26 Cl1 118.2(3) . . ?
 C31 C26 C27 119.8(4) . . ?
 C27 C28 H28 120.1 . . ?
 C29 C28 C27 119.8(4) . . ?
 C29 C28 H28 120.1 . . ?
 C26 C31 H31 120.2 . . ?
 C26 C31 C30 119.5(4) . . ?
 C30 C31 H31 120.2 . . ?
 C31 C30 H30 120.2 . . ?
 C29 C30 C31 119.5(5) . . ?
 C29 C30 H30 120.2 . . ?
 C28 C29 C30 121.0(5) . . ?
 C28 C29 H29 119.5 . . ?
 C30 C29 H29 119.5 . . ?
 C21 C22 H22A 107.4 . . ?
 C21 C22 H22B 107.4 . . ?
 C21 C22 H22C 112.9 . . ?
 C21 C22 H22D 112.8 . . ?
 C21 C22 C23 119.6(5) . . ?
 C21 C22 C44 96.9(6) . . ?
 H22A C22 H22B 107.0 . . ?
 H22C C22 H22D 109.5 . . ?
 C23 C22 H22A 107.4 . . ?
 C23 C22 H22B 107.4 . . ?
 C44 C22 H22C 112.3 . . ?
 C44 C22 H22D 112.1 . . ?
 C33 C32 Cl6 117.4(8) . . ?
 C33 C32 C37 120.0 . . ?
 C37 C32 Cl6 122.4(8) . . ?
 C32 C33 H33 120.0 . . ?
 C32 C33 C34 120.0 . . ?
 C34 C33 H33 120.0 . . ?
 C33 C34 H34 120.0 . . ?
 C35 C34 C33 120.0 . . ?
 C35 C34 H34 120.0 . . ?
 C34 C35 H35 120.0 . . ?
 C34 C35 C36 120.0 . . ?
 C36 C35 H35 120.0 . . ?
 C35 C36 H36 120.0 . . ?
 C37 C36 C35 120.0 . . ?
 C37 C36 H36 120.0 . . ?
 C32 C37 Cl3 120.8(9) . . ?
 C36 C37 Cl3 119.2(9) . . ?
 C36 C37 C32 120.0 . . ?
 C22 C23 H23A 116.2 . . ?
 C22 C23 H23B 104.7 . . ?
 H23A C23 H23B 109.5 . . ?
 C24 C23 C22 106.4(6) . . ?
 C24 C23 H23A 120.2 . . ?
 C24 C23 H23B 97.3 . . ?
 C23 C24 H24A 122.6 . . ?
 C23 C24 H24B 99.4 . . ?
 C23 C24 H24C 105.6 . . ?
 H24A C24 H24B 109.5 . . ?
 H24A C24 H24C 109.5 . . ?
 H24B C24 H24C 109.5 . . ?
 C38 C39 Cl2 121.4(11) . . ?
 C38 C39 C40 120.0 . . ?
 C40 C39 Cl2 118.5(11) . . ?
 C39 C38 Cl5 120.8(10) . . ?
 C39 C38 C43 120.0 . . ?
 C43 C38 Cl5 119.2(10) . . ?
 C38 C43 H43 120.0 . . ?
 C42 C43 C38 120.0 . . ?
 C42 C43 H43 120.0 . . ?
 C43 C42 H42 120.0 . . ?
 C43 C42 C41 120.0 . . ?
 C41 C42 H42 120.0 . . ?
 C42 C41 H41 120.0 . . ?
 C40 C41 C42 120.0 . . ?
 C40 C41 H41 120.0 . . ?
 C39 C40 H40 120.0 . . ?
 C41 C40 C39 120.0 . . ?
 C41 C40 H40 120.0 . . ?
 C22 C44 H44A 109.1 . . ?
 C22 C44 H44B 109.6 . . ?
 H44A C44 H44B 109.5 . . ?
 C45 C44 C22 109.5(11) . . ?
 C45 C44 H44A 109.7 . . ?
 C45 C44 H44B 109.4 . . ?
 C44 C45 H45A 108.7 . . ?
 C44 C45 H45B 109.0 . . ?
 C44 C45 H45C 110.7 . . ?
 H45A C45 H45B 109.5 . . ?
 H45A C45 H45C 109.5 . . ?
 H45B C45 H45C 109.5 . . ?

loop_
  _geom_torsion_atom_site_label_1
  _geom_torsion_atom_site_label_2
  _geom_torsion_atom_site_label_3
  _geom_torsion_atom_site_label_4
  _geom_torsion
  _geom_torsion_site_symmetry_1
  _geom_torsion_site_symmetry_2
  _geom_torsion_site_symmetry_3
  _geom_torsion_site_symmetry_4
  _geom_torsion_publ_flag
 Co1 N3 C18 C17 176.5(2) 2_646 . . . ?
 Co1 N3 C15 C14 -176.43(18) 2_646 . . . ?
 Co1 N1 C5 C4 -175.08(18) . . . . ?
 Co1 N1 C1 C2 175.5(2) . . . . ?
 Cl1 C26 C31 C30 179.1(4) . . . . ?
 Cl4 C27 C26 Cl1 0.8(5) . . . . ?
 Cl4 C27 C26 C31 -179.0(3) . . . . ?
 Cl4 C27 C28 C29 179.8(4) . . . . ?
 O1 C11 C10 C9 179.3(2) . . . . ?
 O1 C19 C20 C21 -65.4(4) . . . . ?
 N3 C18 C17 C16 -0.5(4) . . . . ?
 N1 C5 C4 C6 179.1(2) . . . . ?
 N1 C5 C4 C3 -0.5(4) . . . . ?
 N1 C1 C2 C3 -0.1(5) . . . . ?
 N2 C13 C14 C15 28.6(3) . . . . ?
 N2 C13 C14 C16 -152.0(2) . . . . ?
 N2 C13 C12 C8 -2.9(4) . . . . ?
 N2 C6 C4 C5 171.8(2) . . . . ?
 N2 C6 C4 C3 -8.5(4) . . . . ?
 Cl6 C32 C33 C34 -175.1(5) . . . . ?
 Cl6 C32 C37 Cl3 -5.7(5) . . . . ?
 Cl6 C32 C37 C36 174.8(5) . . . . ?
 C18 N3 C15 C14 0.1(3) . . . . ?
 C13 N2 C6 C7 2.1(4) . . . . ?
 C13 N2 C6 C4 -177.0(2) . . . . ?
 C13 C14 C15 N3 179.8(2) . . . . ?
 C13 C14 C16 C17 179.8(2) . . . . ?
 C13 C12 C8 C9 -177.2(2) . . . . ?
 C13 C12 C8 C7 1.5(4) . . . . ?
 C11 O1 C19 C20 -165.7(2) . . . . ?
 C11 C9 C8 C12 -52.4(3) 3_667 . . . ?
 C11 C9 C8 C7 129.0(3) 3_667 . . . ?
 C11 C9 C10 C11 0.3(4) 3_667 . . . ?
 C14 C13 C12 C8 178.2(2) . . . . ?
 C14 C16 C17 C18 0.8(4) . . . . ?
 C5 N1 C1 C2 -0.7(4) . . . . ?
 C5 C4 C3 C2 -0.3(4) . . . . ?
 C9 C11 C10 C9 -0.3(4) 3_667 . . . ?
 C9 C8 C7 C6 -179.7(2) . . . . ?
 C12 C13 C14 C15 -152.5(2) . . . . ?
 C12 C13 C14 C16 27.0(4) . . . . ?
 C12 C8 C7 C6 1.6(4) . . . . ?
 C15 N3 C18 C17 0.1(4) . . . . ?
 C15 C14 C16 C17 -0.7(4) . . . . ?
 C8 C9 C10 C11 -179.1(2) . . . . ?
 C8 C7 C6 N2 -3.5(4) . . . . ?
 C8 C7 C6 C4 175.5(2) . . . . ?
 C7 C6 C4 C5 -7.2(4) . . . . ?
 C7 C6 C4 C3 172.4(3) . . . . ?
 C10 C9 C8 C12 127.0(3) . . . . ?
 C10 C9 C8 C7 -51.6(3) . . . . ?
 C1 N1 C5 C4 1.0(4) . . . . ?
 C16 C14 C15 N3 0.2(4) . . . . ?
 C6 N2 C13 C14 -179.9(2) . . . . ?
 C6 N2 C13 C12 1.2(4) . . . . ?
 C6 C4 C3 C2 -180.0(3) . . . . ?
 C4 C3 C2 C1 0.6(5) . . . . ?
 C19 O1 C11 C9 165.4(2) . . . 3_667 ?
 C19 O1 C11 C10 -14.2(4) . . . . ?
 C19 C20 C21 C22 -68.8(5) . . . . ?
 C20 C21 C22 C23 -179.6(5) . . . . ?
 C20 C21 C22 C44 -155.3(6) . . . . ?
 C21 C22 C23 C24 77.7(9) . . . . ?
 C21 C22 C44 C45 164.8(12) . . . . ?
 C27 C26 C31 C30 -1.1(6) . . . . ?
 C27 C28 C29 C30 -0.4(7) . . . . ?
 C26 C27 C28 C29 -0.2(6) . . . . ?
 C26 C31 C30 C29 0.5(7) . . . . ?
 C28 C27 C26 Cl1 -179.2(3) . . . . ?
 C28 C27 C26 C31 0.9(6) . . . . ?
 C31 C30 C29 C28 0.2(7) . . . . ?
 C32 C33 C34 C35 0.0 . . . . ?
 C33 C32 C37 Cl3 179.5(5) . . . . ?
 C33 C32 C37 C36 0.0 . . . . ?
 C33 C34 C35 C36 0.0 . . . . ?
 C34 C35 C36 C37 0.0 . . . . ?
 C35 C36 C37 Cl3 -179.5(5) . . . . ?
 C35 C36 C37 C32 0.0 . . . . ?
 C37 C32 C33 C34 0.0 . . . . ?
 Cl2 C39 C38 Cl5 6.5(7) . . . . ?
 Cl2 C39 C38 C43 -175.7(6) . . . . ?
 Cl2 C39 C40 C41 175.9(6) . . . . ?
 Cl5 C38 C43 C42 177.8(7) . . . . ?
 C39 C38 C43 C42 0.0 . . . . ?
 C38 C39 C40 C41 0.0 . . . . ?
 C38 C43 C42 C41 0.0 . . . . ?
 C43 C42 C41 C40 0.0 . . . . ?
 C42 C41 C40 C39 0.0 . . . . ?
 C40 C39 C38 Cl5 -177.7(7) . . . . ?
 C40 C39 C38 C43 0.0 . . . . ?

_shelx_res_file
;
TITL cas113_6_150k_a.res in P2(1)/n
    cas113_6_150k.res
    created by SHELXL-2018/3 at 17:34:20 on 15-Dec-2021
REM Old TITL
REM SHELXT solution in P2(1)/n: R1 0.185, Rweak 0.018, Alpha 0.049
REM <I/s> 0.000 for 0 systematic absences, Orientation as input
REM Formula found by SHELXT: C76 N16 Co S6
CELL 1.34143 15.4135 14.3925 16.9214 90 112.398 90
ZERR 2 0.0004 0.0002 0.0004 0 0.002 0
LATT 1
SYMM 0.5-X,0.5+Y,0.5-Z
SFAC C H Cl Co N O S
DISP C 0.0137 0.0067 57.1
DISP Cl 0.3281 0.5435 4162.2
DISP Co -0.6628 2.9049 22109.5
DISP H 0 0 0.6
DISP N 0.0241 0.0134 109.9
DISP O 0.0389 0.0241 193.4
DISP S 0.2925 0.4295 3294.4
UNIT 145.6 126.4 15.2 2 16 4 4
DFIX 1.5 0.005 C24 C23
SADI C23 C22 C22 C21 C21 C20 C20 C19
SADI C45 C44 C24 C23
SADI C44 C22 C23 C22
SIMU C24 C23 C44 C45
DELU C44 C23 C24 C45

L.S. 10
PLAN  5
SIZE 0.08 0.127 0.2
TEMP -123.15
CONF
BOND
list 4
MORE -1
fmap 2
ACTA
BOND $H
OMIT 0 2 4
OMIT 1 3 2
OMIT 0 3 5
OMIT -7 13 13
OMIT -1 0 1
OMIT 1 0 1
REM <olex2.extras>
REM <HklSrc "%./CAS113_6_150K.hkl">
REM </olex2.extras>

WGHT    0.087500    4.389300
FVAR       0.31529
CO1   4    0.500000    0.500000    0.500000    10.50000    0.02208    0.01571 =
         0.01144   -0.00093    0.00525   -0.00278
S1    7    0.402614    0.364743    0.225593    11.00000    0.05858    0.04439 =
         0.01888   -0.00836    0.01308   -0.01563
CL1   3    0.832160    0.532039    1.031115    11.00000    0.07552    0.07832 =
         0.11096   -0.03155    0.04612    0.01109
CL4   3    0.957856    0.349066    1.086649    11.00000    0.08617    0.10642 =
         0.10357    0.01737    0.04389    0.02750
O1    6    0.537935    0.688001    1.002666    11.00000    0.04139    0.01850 =
         0.04240   -0.00113    0.02672    0.00219
N3    5    0.871585    0.045371    1.022119    11.00000    0.02397    0.02036 =
         0.01459    0.00178    0.00685    0.00380
N1    5    0.580433    0.392264    0.588707    11.00000    0.02521    0.02139 =
         0.01680    0.00102    0.00804    0.00086
N2    5    0.688438    0.243626    0.864147    11.00000    0.02796    0.02360 =
         0.01848    0.00358    0.01069    0.00697
N4    5    0.467905    0.408689    0.398829    11.00000    0.02729    0.02167 =
         0.01695   -0.00314    0.00828   -0.00479
PART 1
CL6   3    0.137320    0.279760    0.832497    10.50000    0.07993    0.08412 =
         0.04915   -0.01539    0.01153    0.03015
CL3   3    0.315791    0.355553    0.799963    10.50000    0.15184    0.06291 =
         0.04209    0.00552   -0.00174   -0.04333

PART 0
C18   1    0.845654    0.005214    1.081945    11.00000    0.02781    0.02134 =
         0.02165    0.00386    0.00775    0.00420
AFIX  43
H18   2    0.881338   -0.045957    1.113158    11.00000   -1.20000
AFIX   0
C13   1    0.688721    0.232712    0.943351    11.00000    0.02781    0.02141 =
         0.01937    0.00311    0.01032    0.00444
C11   1    0.520657    0.594710    0.999882    11.00000    0.03117    0.01980 =
         0.02102    0.00234    0.01162    0.00510
C14   1    0.742386    0.152409    0.993076    11.00000    0.02789    0.02056 =
         0.01782    0.00092    0.00878    0.00549
C5    1    0.582921    0.384633    0.668944    11.00000    0.02830    0.02029 =
         0.01849    0.00187    0.01151    0.00349
AFIX  43
H5    2    0.544214    0.424946    0.685735    11.00000   -1.20000
AFIX   0
C9    1    0.544226    0.435118    0.965768    11.00000    0.02950    0.02191 =
         0.01817    0.00316    0.01085    0.00680
C12   1    0.640544    0.291768    0.976965    11.00000    0.03222    0.02425 =
         0.01730    0.00359    0.01192    0.00566
AFIX  43
H12   2    0.640033    0.280106    1.032044    11.00000   -1.20000
AFIX   0
C15   1    0.819757    0.117604    0.979172    11.00000    0.02910    0.01942 =
         0.01820    0.00267    0.01050    0.00514
AFIX  43
H15   2    0.836861    0.146686    0.936811    11.00000   -1.20000
AFIX   0
C25   1    0.440121    0.389178    0.326670    11.00000    0.02679    0.01952 =
         0.02393   -0.00093    0.01052   -0.00549
C8    1    0.593035    0.367974    0.930095    11.00000    0.02997    0.02093 =
         0.01912    0.00134    0.01210    0.00550
C7    1    0.594431    0.380410    0.848723    11.00000    0.03084    0.02247 =
         0.02131    0.00565    0.01139    0.00880
AFIX  43
H7    2    0.564153    0.432507    0.815014    11.00000   -1.20000
AFIX   0
C10   1    0.563876    0.529721    0.965985    11.00000    0.03027    0.02293 =
         0.02083    0.00257    0.01254    0.00524
AFIX  43
H10   2    0.607607    0.550229    0.942546    11.00000   -1.20000
AFIX   0
C1    1    0.634140    0.334140    0.565627    11.00000    0.03806    0.03060 =
         0.01888    0.00289    0.01398    0.00664
AFIX  43
H1    2    0.632662    0.338130    0.509088    11.00000   -1.20000
AFIX   0
C16   1    0.718122    0.109481    1.055581    11.00000    0.03016    0.02647 =
         0.02324    0.00332    0.01371    0.00656
AFIX  43
H16   2    0.666295    0.131434    1.067562    11.00000   -1.20000
AFIX   0
C17   1    0.770260    0.034607    1.099977    11.00000    0.03398    0.02819 =
         0.02338    0.00756    0.01449    0.00571
AFIX  43
H17   2    0.754274    0.003930    1.142280    11.00000   -1.20000
AFIX   0
C6    1    0.640601    0.315760    0.817450    11.00000    0.02953    0.02249 =
         0.01770    0.00245    0.01109    0.00456
C4    1    0.638911    0.321119    0.728548    11.00000    0.02998    0.02379 =
         0.01766    0.00242    0.01125    0.00466
C3    1    0.694335    0.262360    0.702776    11.00000    0.04406    0.03471 =
         0.02423    0.00870    0.01700    0.01901
AFIX  43
H3    2    0.733934    0.218076    0.741442    11.00000   -1.20000
AFIX   0
C2    1    0.691525    0.268731    0.619971    11.00000    0.04991    0.04209 =
         0.02507    0.00676    0.02173    0.02047
AFIX  43
H2    2    0.728640    0.228563    0.601109    11.00000   -1.20000
AFIX   0
C19   1    0.618776    0.718673    0.987517    11.00000    0.03749    0.02657 =
         0.03730   -0.00243    0.01985   -0.00035
AFIX  23
H19A  2    0.607263    0.713474    0.925994    11.00000   -1.20000
H19B  2    0.673841    0.679892    1.020204    11.00000   -1.20000
AFIX   0
C20   1    0.636862    0.818978    1.016055    11.00000    0.04178    0.03015 =
         0.05703   -0.00749    0.02117   -0.00414
AFIX  23
H20A  2    0.644328    0.822513    1.076736    11.00000   -1.20000
H20B  2    0.697129    0.838356    1.012991    11.00000   -1.20000
AFIX   0
C21   1    0.562398    0.887496    0.965801    11.00000    0.04706    0.03103 =
         0.08435    0.00037    0.02915   -0.00124
AFIX  23
H21A  2    0.575426    0.947937    0.996009    11.00000   -1.20000
H21B  2    0.500799    0.865329    0.963820    11.00000   -1.20000
AFIX   0

C27   1    0.915052    0.387841    0.982674    11.00000    0.04656    0.04723 =
         0.09323   -0.01193    0.03169   -0.00410
C26   1    0.859880    0.467123    0.958755    11.00000    0.04362    0.04282 =
         0.09153   -0.01919    0.02816   -0.00578
C28   1    0.936528    0.338500    0.923290    11.00000    0.06034    0.04346 =
         0.10695   -0.01517    0.03875   -0.00130
AFIX  43
H28   2    0.974449    0.284366    0.939910    11.00000   -1.20000
AFIX   0
C31   1    0.825470    0.495591    0.874650    11.00000    0.05835    0.05129 =
         0.10043   -0.01199    0.02378   -0.00102
AFIX  43
H31   2    0.786790    0.549189    0.857689    11.00000   -1.20000
AFIX   0
C30   1    0.847726    0.445418    0.814955    11.00000    0.08169    0.07239 =
         0.08581   -0.01470    0.02827   -0.00871
AFIX  43
H30   2    0.824821    0.464700    0.756897    11.00000   -1.20000
AFIX   0
C29   1    0.903430    0.367213    0.840511    11.00000    0.07760    0.06113 =
         0.10560   -0.03219    0.04413   -0.00846
AFIX  43
H29   2    0.918839    0.332985    0.799643    11.00000   -1.20000
AFIX   0

C22   1    0.556429    0.902092    0.875238    11.00000    0.10904    0.11482 =
         0.12374    0.07458    0.06803    0.05682
PART 1
AFIX  23
H22A  2    0.544316    0.840769    0.846573    10.60000   -1.20000
H22B  2    0.619108    0.922535    0.878711    10.60000   -1.20000
AFIX   3
PART 2
H22C  2    0.515809    0.857442    0.835198    10.40000   -1.20000
H22D  2    0.617469    0.901912    0.871058    10.40000   -1.20000
AFIX  66

PART 1
C32   1    0.182714    0.223160    0.766243    10.50000    0.04239    0.05368 =
         0.03094   -0.00564    0.00152    0.00798
C33   1    0.140170    0.140446    0.728794    10.50000    0.04073    0.04879 =
         0.02059   -0.00143   -0.00041    0.00204
AFIX  43
H33   2    0.085328    0.119522    0.736256    10.50000   -1.20000
AFIX  65
C34   1    0.177867    0.088347    0.680428    10.50000    0.07418    0.03817 =
         0.02299    0.00110    0.00681    0.00730
AFIX  43
H34   2    0.148790    0.031816    0.654833    10.50000   -1.20000
AFIX  65
C35   1    0.258109    0.118962    0.669510    10.50000    0.06321    0.04759 =
         0.04089    0.00655    0.01520    0.00942
AFIX  43
H35   2    0.283873    0.083354    0.636454    10.50000   -1.20000
AFIX  65
C36   1    0.300654    0.201675    0.706958    10.50000    0.04531    0.06567 =
         0.03429   -0.00011    0.01077    0.00722
AFIX  43
H36   2    0.355495    0.222599    0.699496    10.50000   -1.20000
AFIX  65
C37   1    0.262957    0.253775    0.755325    10.50000    0.04915    0.04992 =
         0.02709    0.01093    0.00632   -0.00370
AFIX   0

C23   1    0.483425    0.971106    0.815948    10.60000    0.06390    0.04878 =
         0.04321    0.00030   -0.01273   -0.00770
AFIX   3
H23A  2    0.455985    0.954736    0.755839    10.60000   -1.20000
H23B  2    0.434515    0.974026    0.838759    10.60000   -1.20000
AFIX   0
C24   1    0.522838    1.066626    0.842615    10.60000    0.07795    0.05250 =
         0.05046   -0.00196    0.00114   -0.00942
AFIX   3
H24A  2    0.549468    1.085776    0.901365    10.60000   -1.50000
H24B  2    0.570678    1.066686    0.819295    10.60000   -1.50000
H24C  2    0.473778    1.108896    0.810805    10.60000   -1.50000
AFIX   0

PART 2
CL2   3    0.388722    0.300563    0.757188    10.40000    0.05348    0.09042 =
         0.07561    0.03148   -0.01270   -0.03689
CL5   3    0.213895    0.368945    0.794848    10.40000    0.13385    0.06239 =
         0.08031   -0.00892    0.02059   -0.00818
AFIX  66
C39   1    0.291154    0.233560    0.732707    10.40000    0.03244    0.05068 =
         0.02592    0.00964    0.00389   -0.00901
C38   1    0.215999    0.261202    0.753407    10.40000    0.04478    0.05214 =
         0.03519    0.00282    0.00159   -0.02061
C43   1    0.139888    0.202116    0.737644    10.40000    0.04445    0.05335 =
         0.04703    0.00703    0.00826   -0.01743
AFIX  43
H43   2    0.088523    0.221009    0.751792    10.40000   -1.20000
AFIX  65
C42   1    0.138932    0.115388    0.701181    10.40000    0.05832    0.05269 =
         0.01225    0.00061   -0.00362   -0.02498
AFIX  43
H42   2    0.086914    0.075005    0.690408    10.40000   -1.20000
AFIX  65
C41   1    0.214087    0.087744    0.680481    10.40000    0.09488    0.05296 =
         0.03323    0.00745   -0.00506   -0.01994
AFIX  43
H41   2    0.213433    0.028469    0.655561    10.40000   -1.20000
AFIX  65
C40   1    0.290198    0.146830    0.696243    10.40000    0.05096    0.06170 =
         0.03025   -0.00166    0.00720   -0.00854
AFIX  43
H40   2    0.341563    0.127937    0.682095    10.40000   -1.20000
AFIX   0

C44   1    0.511116    1.004058    0.862256    10.40000    0.07268    0.07128 =
         0.07595   -0.00372    0.01750   -0.01655
AFIX   3
H44A  2    0.543936    1.041018    0.912816    10.40000   -1.20000
H44B  2    0.445316    0.999628    0.853596    10.40000   -1.20000
AFIX   0
C45   1    0.519947    1.048431    0.786418    10.40000    0.10527    0.09796 =
         0.10410    0.04671    0.01415    0.00837
AFIX   3
H45A  2    0.585257    1.052011    0.795518    10.40000   -1.50000
H45B  2    0.487667    1.011041    0.736908    10.40000   -1.50000
H45C  2    0.493507    1.109781    0.777748    10.40000   -1.50000
AFIX   0
HKLF 4


REM  cas113_6_150k_a.res in P2(1)/n
REM wR2 = 0.1551, GooF = S = 1.050, Restrained GooF = 1.053 for all data
REM R1 = 0.0578 for 6327 Fo > 4sig(Fo) and 0.0603 for all 6666 data
REM 496 parameters refined using 50 restraints

END

WGHT      0.0870      4.4088

REM Highest difference peak  0.869,  deepest hole -0.871,  1-sigma level  0.089
Q1    1   0.1592  0.3355  0.8105  11.00000  0.05    0.87
Q2    1   0.8197  0.4991  1.0700  11.00000  0.05    0.65
Q3    1   0.4642  0.3303  0.2468  11.00000  0.05    0.53
Q4    1   0.5619  0.9554  0.9029  11.00000  0.05    0.53
Q5    1   0.3587  0.3591  0.7747  11.00000  0.05    0.48
;
_shelx_res_checksum                47350
_shelx_hkl_file
;
 -12   1  16   79.04    1.29
 -12   1  17    3.46    0.78
 -12   2  15   40.10    1.15
 -12   2  18    9.25    0.81
 -12   3  15    4.79    0.94
 -12   3  18    0.20    0.72
 -11   2  11   41.58    1.05
 -11   5  12    3.72    1.03
 -11   6  13   17.94    1.17
 -10   1   9   72.02    1.01
 -10   8  13    0.96    1.06
  -8   4   6    1.55    0.58
  -7   9   8  266.31    2.16
 -12   2  16   37.80    1.15
 -12   2  17   12.52    0.90
 -12   3  17   65.72    1.25
 -10  -1  10  104.37    1.07
 -10   2   9   22.28    0.80
 -10   3   9   48.58    1.02
  -8  10  12   39.07    1.30
  -7   8   7   63.23    1.21
  -7  11  13    1.97    1.03
 -11   4  12   15.79    1.22
 -11   6  14   36.93    1.31
 -11   6  18    0.83    0.90
 -10   8  17   13.23    1.03
  -8   6   7   34.50    0.97
  -8   9  10    7.00    1.06
  -7  10  10  182.23    2.07
  -7  11  14    4.16    1.02
  -7  11  15    0.01    0.85
  -4  10   6  291.45    2.03
 -11   5  13   12.62    1.11
 -11   6  15   40.10    1.31
 -11   6  17   22.96    1.11
 -10   5  10    7.81    0.94
 -10   8  15   13.54    1.12
  -9   8  11  116.40    1.72
  -9   9  17   16.22    0.97
  -8  10  13   59.76    1.41
  -6   8   6   52.07    1.04
  -6   9   7   32.51    1.03
  -5   8   5  139.11    1.39
 -11   1  12   97.16    1.33
 -11   2  12   22.05    1.11
 -11   6  16  167.74    1.92
 -10   6  11    6.13    1.03
  -9   6   9   98.39    1.44
  -9   9  15    1.20    1.15
  -8  10  15    3.61    1.10
  -6  11  11   35.05    1.30
  -5   9   6  248.36    1.84
  -4   9   5   12.16    0.72
 -11   0  13  128.78    1.53
 -11   5  14    5.65    1.08
 -10   0  10   65.47    0.96
 -10   4  10   68.63    1.26
  -9   4   8   13.09    0.77
  -9   7  10  128.05    1.69
  -7   6   6    0.87    0.67
 -11   4  13   88.80    1.54
 -11   4  19    5.90    0.85
 -10   7  18   -0.34    0.91
  -9   1   8   36.85    0.76
  -9   3   8  398.05    2.11
  -8   5   7  232.16    1.72
  -7   9   9   22.41    1.13
  -7  10  11   26.61    1.25
  -6  11  12   58.34    1.53
 -11   1  13  159.02    1.67
 -11   1  19   24.39    0.84
 -11   3  13   20.97    1.10
 -11   3  19    5.30    0.84
 -10  -1  11   19.31    0.80
 -10   2  10  101.62    1.36
 -11   2  13  123.93    1.58
 -11   2  19    6.18    0.75
 -11   4  18    3.30    0.94
 -10   6  19    1.81    0.87
 -10   7  15   19.01    1.23
 -10   7  16    7.09    1.08
  -9   5   9    0.85    0.81
  -9   8  18   17.39    1.00
  -6  11  13    2.72    1.09
 -11   3  14   94.22    1.65
  -9  -1   9  141.59    1.15
  -9   7  11    3.00    1.06
  -9   8  13    6.81    1.16
  -8   4   7    1.81    0.62
  -8   6   8  132.02    1.52
  -8   8  10  228.95    2.17
  -7   5   6   19.01    0.77
  -7  10  12    0.41    1.10
  -6   9   8   40.93    1.31
  -5  10   8    3.02    0.90
 -11   0  15   94.15    1.40
 -11   0  17   -0.35    0.77
 -11   1  14   79.54    1.35
 -11   1  18   20.07    0.89
 -11   2  18    2.33    0.88
 -10   4  11   -0.56    0.90
 -10   6  13   79.15    1.59
 -10   6  18   56.06    1.41
  -9   6  10   -0.12    0.94
  -8   7   9   44.48    1.22
  -7  10  13   37.36    1.52
  -7  10  16    0.45    1.01
  -6  10  10   10.01    1.27
  -4  10   7   56.95    1.27
 -11   1  15  121.23    1.64
 -11   1  17   25.05    1.08
 -11   3  16  134.88    1.83
 -11   3  17   35.76    1.19
  -9   4   9  121.59    1.43
  -9   8  15    8.48    1.17
  -8   3   7  402.11    2.02
  -7   9  10  157.10    1.94
  -7  10  14   28.55    1.43
  -6   8   7   36.76    1.04
 -11   1  16   56.33    1.28
 -11   2  15   48.64    1.28
 -11   2  16   64.95    1.35
 -11   2  17   12.54    1.00
 -10  -1  12  172.43    1.57
 -10   5  19   84.51    1.45
 -10   6  14   27.14    1.32
 -10   6  17    4.71    1.05
  -9   0   9   28.39    0.77
  -9   7  12    2.66    1.12
 -10   2  11   34.74    1.04
 -10   6  15    3.15    1.16
  -9   3   9   57.81    1.08
  -8   8  11   12.59    1.19
  -7   6   7    9.16    0.81
  -5  11  12  151.09    2.00
  -5  11  15    5.45    1.02
 -10   4  12   83.78    1.50
 -10   5  13   61.42    1.49
 -10   5  18    7.20    1.17
  -9   1   9  157.41    1.37
  -9   5  10    2.55    0.92
  -9   6  11  114.78    1.70
  -9   7  18  114.10    1.68
  -8   5   8   68.05    1.17
  -7   9  11    7.69    1.39
  -6  10  11  178.58    2.14
  -5  10   9   37.01    1.34
  -5  11  13    0.46    1.27
  -5  11  14  108.40    1.81
 -10   4  19   25.46    1.12
  -9   7  13   19.10    1.31
  -8   6   9   77.20    1.37
  -8   7  10    4.33    1.05
  -8   8  18   60.49    1.34
  -7   7   8   24.60    1.05
 -10  -1  13  140.86    1.52
 -10   5  15   94.03    1.89
 -10   5  17  130.78    1.85
  -9  -1  10  110.87    1.18
  -9   6  19   83.05    1.50
  -9   7  14   67.65    1.67
  -9   7  17   13.06    1.15
  -8   8  12   26.33    1.35
  -6  10  12  155.40    2.24
  -6  10  16   12.94    1.15
 -10   1  12  186.93    1.78
 -10   2  12  643.44    3.14
 -10   3  19   30.57    1.14
 -10   5  16   22.39    1.30
  -9   4  10    1.38    0.87
  -9   6  12   14.05    1.23
  -9   7  16   11.55    1.25
  -8   4   8   58.73    1.08
  -8   8  17    0.99    1.09
  -7   9  12    9.38    1.26
  -4  11  11  108.08    1.90
 -10  -1  14   31.21    1.17
 -10   2  19   25.72    1.02
 -10   4  14   53.57    1.66
  -9   5  11   46.29    1.34
  -8   7  19    4.41    0.99
  -7   5   7  108.72    1.34
  -6  10  13    8.59    1.29
  -6  10  14   79.03    1.79
  -6  10  15    0.15    1.20
  -5  10  10   11.08    1.37
  -4  11  15   16.11    1.17
 -10   0  18   69.66    1.30
 -10   3  18    0.81    1.14
  -9   3  10  128.78    1.54
  -9   6  18    3.28    1.16
  -8   7  11   76.83    1.62
  -8   8  14   91.44    1.84
  -8   8  15    2.98    1.28
  -8   8  16    6.64    1.21
  -7   9  13   75.11    1.75
  -5   9   8   47.50    1.30
  -4  11  12   34.15    1.54
 -10   1  13  150.60    1.75
 -10   2  13    1.34    1.00
 -10   2  18   41.13    1.33
  -9   5  19    0.45    1.09
  -8   5   9  141.78    1.65
  -4  11  13    1.65    1.23
 -10   0  14  120.46    1.62
 -10   1  18    3.37    0.95
 -10   3  17   49.80    1.41
  -9   1  10  122.87    1.38
  -9   2  10  172.57    1.66
  -9   6  14    0.52    1.30
  -9   6  17  110.56    1.89
  -8   6  10  187.88    2.01
  -8   7  18    4.70    1.17
  -7   6   8    4.45    0.89
  -7   7   9   39.88    1.32
  -7   8  18    5.39    1.13
 -10   0  16    9.20    1.10
 -10   2  14   73.39    1.52
 -10   2  17    6.15    1.22
 -10   3  15    8.53    1.21
 -10   3  16  169.29    2.07
  -9   3  20   46.23    1.26
  -9   4  11    9.05    1.06
  -9   5  12   19.09    1.28
  -9   6  15   20.56    1.46
  -7   4   7    6.33    0.72
  -5  10  16    2.16    1.08
 -10   1  15    3.69    1.16
 -10   1  16    0.61    1.14
 -10   2  15   58.52    1.46
 -10   2  16   55.59    1.43
  -9   1  20   27.83    0.97
  -9   5  18   29.36    1.33
  -8   6  19   12.34    1.15
  -8   7  17  121.57    2.09
  -6   8   9   20.01    1.42
  -6   9  11   16.77    1.38
  -6   9  17    6.73    1.12
  -3   9   6    4.34    0.91
  -9   3  11   40.63    1.21
  -9   5  13    7.79    1.27
  -8   4   9   11.91    0.89
  -8   7  13   56.58    1.68
  -7   7  19    4.22    1.12
  -7   8  17  113.92    1.88
  -5   9   9    1.85    1.13
  -5  10  15   14.92    1.34
  -9   0  11  150.25    1.51
  -9   4  12    3.84    1.11
  -9   5  17   84.90    1.77
  -8   6  11    3.83    1.15
  -8   7  14   36.17    1.60
  -8   7  15   47.74    1.88
  -7   7  10  147.81    1.93
  -7   8  12   39.57    1.57
  -6   9  12   33.70    1.54
  -6   9  16    5.43    1.28
  -5  10  14  128.47    2.13
  -3  10   8    1.58    1.16
  -3  11  13    9.75    1.43
  -9   1  11    3.80    0.81
  -9   2  11   59.13    1.25
  -9   3  19    1.30    1.09
  -9   5  15   16.52    1.41
  -9   5  16   18.40    1.40
  -8   6  18   70.16    1.76
  -7   5   8  100.41    1.38
  -7   8  13   43.19    1.63
  -7   8  16   67.12    1.68
  -6   9  15   18.31    1.57
  -4  10  10    1.85    1.37
  -9  -1  12   49.56    1.15
  -9   0  19   11.27    0.86
  -8   3   9  115.09    1.39
  -7   6   9  251.68    2.15
  -7   8  14   13.71    1.44
  -7   8  15   17.67    1.44
  -6   8  18    2.21    1.11
  -6   9  13   13.19    1.41
  -6   9  14   36.98    1.57
  -4  10  16    6.96    1.10
  -9   1  19   19.34    1.03
  -9   3  12  249.23    2.22
  -9   4  13  500.91    3.17
  -9   4  17   14.06    1.30
  -8   5  19   65.70    1.58
  -8   6  12    6.47    1.24
  -7   7  18    7.62    1.24
  -6   8  10  130.03    1.92
  -5   9  17    5.94    1.17
  -9   2  12  253.76    2.16
  -9   3  18   10.61    1.14
  -9   4  14    7.57    1.24
  -9   4  16   40.55    1.69
  -8   1   9  366.64    2.04
  -8   4  10    5.38    0.92
  -8   6  17   85.65    1.82
  -7   7  11   22.85    1.32
  -4  10  11   37.86    1.51
  -4  10  15  109.05    1.96
  -9  -1  13   18.33    1.05
  -9   1  12   50.28    1.20
  -9   2  18    7.13    1.21
  -9   4  15  110.35    1.90
  -8   3  20   43.47    1.32
  -8   6  13   30.17    1.47
  -8   6  16   56.22    1.71
  -7   4   8  313.30    2.05
  -7   6  19   12.47    1.20
  -6   7  19    2.72    1.11
  -4  10  12   16.69    1.61
  -3  10   9    7.47    1.31
  -9   1  18   37.14    1.20
  -9   3  17    8.19    1.18
  -8   0  20   41.06    1.07
  -8   2  20   73.79    1.48
  -8   4  19    1.02    1.28
  -8   5  18   36.32    1.46
  -8   6  14   53.79    1.67
  -7   6  10   26.37    1.19
  -7   7  12    1.52    1.46
  -7   7  17   11.57    1.29
  -6   5   7   62.76    1.12
  -6   8  17   17.31    1.32
  -5   9  11  170.06    2.27
  -5   9  16   19.65    1.32
  -4  10  13    9.43    1.49
  -4  10  14  191.53    2.42
  -3   9   7    1.61    0.89
  -3  10  16   -0.42    1.11
  -9  -1  14  106.47    1.55
  -9   0  13   56.35    1.30
  -9   2  13    5.27    1.05
  -9   2  17    4.13    1.26
  -8   1  20   56.48    1.29
  -7   5   9  146.69    1.65
  -6   6   8  101.61    1.44
  -9  -1  15  132.06    1.63
  -9   0  17    6.57    0.98
  -9   1  13   17.56    1.06
  -9   1  17    3.65    1.14
  -9   2  14   99.42    1.78
  -8  -1  10  205.09    1.52
  -8   4  11   53.07    1.31
  -8   5  17    0.19    1.50
  -7   7  13    8.59    1.36
  -7   7  16   11.53    1.40
  -6   8  16   44.79    1.55
  -5   9  15   28.59    1.43
  -4   9   9    2.80    1.09
  -3  10  10    1.92    1.39
  -9   0  15    5.24    1.07
  -9   1  14  107.92    1.71
  -9   2  15   11.41    1.16
  -9   2  16    3.83    1.07
  -8   3  19    5.16    1.19
  -8   5  13   77.30    1.70
  -7   3   8  631.87    2.70
  -7   4  20    0.51    1.05
  -7   7  14  129.86    2.14
  -7   7  15  113.26    2.07
  -6   7  18   18.74    1.37
  -3  10  15    2.33    1.38
  -9   1  15  138.97    1.79
  -8   0  10  458.59    2.27
  -8   1  10  211.94    1.68
  -8   4  18    4.60    1.20
  -8   5  14   45.39    1.77
  -8   5  16   20.04    1.46
  -7   5  19    1.55    1.21
  -7   6  11   21.69    1.24
  -2  10  16   20.52    1.13
  -8   2  19    1.52    1.11
  -8   4  12  716.03    3.56
  -8   5  15   18.68    1.45
  -6   6  19    1.76    1.22
  -3  10  14    4.16    1.35
  -8   1  19    2.54    0.98
  -8   3  11   40.87    1.16
  -8   4  17    1.25    1.25
  -7   3  20   12.23    1.15
  -7   5  10   76.07    1.39
  -5   8  10   54.23    1.50
  -3  10  12   12.27    1.50
  -3  10  13    3.21    1.45
  -2  10   9   31.16    1.46
  -8  -1  11  266.51    1.84
  -8   4  13    8.21    1.19
  -7   6  16    3.15    1.37
  -6   5   8   52.92    1.10
  -6   6   9    6.74    0.93
  -6   7  17   42.32    1.53
  -2  10  15    5.19    1.23
  -8   4  14   38.11    1.47
  -8   4  15    3.37    1.49
  -8   4  16    4.18    1.28
  -7   2  20   57.38    1.50
  -7   4  19   31.45    1.47
  -7   5  18    2.00    1.24
  -7   6  13  190.14    2.30
  -6   7  11   12.55    1.24
  -4   9  15   43.81    1.58
  -8   0  18  162.08    1.81
  -8   1  11  272.09    1.97
  -8   2  18   12.78    1.16
  -8   3  12  378.62    2.58
  -7   1  20   59.60    1.37
  -7   3   9  256.03    1.86
  -7   5  11    4.32    1.04
  -7   6  14  210.41    2.47
  -6   4  20   -1.12    1.14
  -6   6  18    4.75    1.40
  -6   7  16   15.06    1.42
  -5   7  18   11.31    1.22
  -5   8  11   35.23    1.46
  -4   9  14    3.72    1.56
  -8   1  18    1.91    1.02
  -7   5  17   14.70    1.64
  -6   5  19    0.86    1.28
  -6   7  12  131.26    2.01
  -4   9  13  105.03    2.05
  -3   9   9    1.48    1.17
  -2  10  14  183.86    2.32
  -1  10  15    1.46    1.21
  -8  -1  12    3.36    0.80
  -8   2  17    4.60    1.11
  -8   3  13   66.18    1.47
  -7   4  10   46.88    1.17
  -6   7  13  431.56    3.24
  -6   7  14   75.32    1.86
  -5   6  19    1.98    1.11
  -5   8  12   35.08    1.52
  -3   8  18   23.01    1.13
  -2  10  13   23.69    1.71
  -8   0  12   76.71    1.32
  -8   1  12    4.50    0.83
  -8   1  17    3.07    1.18
  -8   3  14   14.00    1.23
  -8   3  15    8.12    1.25
  -7   2   9   80.34    1.14
  -7   4  18    7.76    1.29
  -7   5  12  468.80    3.04
  -7   5  16   32.51    1.58
  -8  -1  13  233.84    1.92
  -8   2  16   48.50    1.42
  -7   2  19    2.68    1.20
  -7   5  13    6.43    1.25
  -6   4   8   12.98    0.77
  -6   5   9  109.82    1.45
  -6   6  17   14.02    1.40
  -5   7  17   21.03    1.37
  -3   9  15  114.88    2.08
  -8  -1  14   17.03    1.08
  -8   0  16   15.63    1.14
  -8   1  13  233.49    2.09
  -8   1  16   37.10    1.37
  -7   1  19    1.12    1.09
  -7   3  10   97.40    1.35
  -7   4  11  180.55    1.88
  -7   5  15  149.53    2.20
  -6   6  11   34.70    1.31
  -3   9  10    6.96    1.22
  -2   9  16   40.38    1.48
  -1  10  14    6.26    1.29
  -8   0  14  122.41    1.66
  -8   1  14   15.99    1.17
  -8   1  15   15.58    1.23
  -7   0  19    8.25    0.98
  -6   2  20    8.65    1.15
  -6   4  19    3.59    1.25
  -5   4  20   30.14    1.29
  -4   8  10    3.14    1.30
  -3   9  14   60.82    1.91
  -6   1  20    2.98    1.10
  -6   6  12   38.21    1.43
  -5   5  19    0.34    1.12
  -5   7  16   59.74    1.73
  -4   6  19   22.89    1.22
  -3   8  17    9.32    1.14
  -7   2  18   -1.34    1.09
  -7   4  12   79.77    1.52
  -7   4  16    7.01    1.34
  -6   0  20  119.29    1.60
  -6   6  13   91.32    1.85
  -6   6  14    8.12    1.63
  -6   6  15   37.48    1.63
  -4   8  15   21.78    1.46
  -7  -1  18   22.08    1.03
  -7   3  11   23.19    1.01
  -7   4  15   36.17    1.51
  -6   5  17   55.88    1.73
  -5   6   9  108.66    1.50
  -5   7  15    6.35    1.38
  -4   8  11   56.88    1.58
  -4   8  14    2.34    1.33
  -2   9  15   21.00    1.42
  -1   9  16    1.92    1.09
  -7   1  10  551.66    2.54
  -7   1  18   23.16    1.22
  -6   4   9   92.00    1.27
  -6   4  18  121.10    2.05
  -5   3  20    6.75    1.14
  -5   7  12   60.85    1.64
  -5   7  13   63.75    1.75
  -5   7  14   13.72    1.46
  -2   8  17   -0.72    1.14
  -7   2  17   11.25    1.39
  -7   3  12  389.95    2.66
  -7   3  16    4.44    1.24
  -6   5  11  181.15    2.04
  -6   5  16   68.18    1.83
  -5   5   8   25.01    0.89
  -3   6  19   34.58    1.24
   0   9  16   32.15    1.31
  -7  -2  11  163.86    1.41
  -7   3  15   99.09    1.95
  -6   2  19   16.05    1.30
  -5   2  20    6.19    1.20
  -5   4  19   48.34    1.62
  -4   5  19    1.53    1.21
  -4   6  18    2.27    1.23
  -7  -1  17    1.53    0.98
  -7   0  17   56.82    1.38
  -7   3  13   75.83    1.52
  -7   3  14   56.24    1.50
  -6   3  18   -0.42    1.46
  -6   5  15   78.23    1.85
  -5   6  16   44.63    1.68
  -4   7  16   47.05    1.64
  -3   8  15  119.74    2.19
  -7  -2  16   23.61    1.06
  -7  -1  11   21.26    0.82
  -7   1  11   23.50    0.87
  -6   3   9  262.37    1.85
  -6   4  10    4.94    0.83
  -5   1  20  117.74    1.81
  -1   8  17    9.49    1.08
  -7  -2  12    5.15    0.75
  -7   0  11   48.80    0.99
  -7   1  16  137.28    1.90
  -5   3  19    3.88    1.39
  -5   6  11   36.72    1.46
  -5   6  15   22.69    1.53
  -4   3  20    1.85    1.07
  -4   7  15  140.36    2.37
  -3   8  14   88.55    2.06
  -2   8  16    7.47    1.29
  -7   1  12  156.91    1.70
  -6   4  16   66.83    1.78
  -5   5   9    0.52    0.77
  -5   5  17    8.01    1.40
  -4   6  17   16.01    1.39
  -1   9  14   40.06    1.63
   0   9  15   14.70    1.43
  -7  -1  12  149.22    1.47
  -7   1  15   74.77    1.46
  -6   3  17   36.96    1.55
  -6   4  11  109.30    1.54
  -5   4  18    8.56    1.35
  -5   6  12    4.57    1.20
  -5   6  13   40.97    1.55
  -5   6  14    5.54    1.37
  -4   4  19   -0.93    1.18
  -4   7  14    1.00    1.36
  -3   5  19    4.12    1.12
  -3   6  18   30.97    1.39
  -7  -1  13   31.19    1.05
  -7  -1  14  511.83    2.76
  -7   0  15   66.22    1.33
  -7   1  13   32.97    1.10
  -7   1  14  529.46    3.00
  -6  -1  18    1.07    0.99
  -4   5  18   13.84    1.32
  -2   8  15    1.01    1.47
  -1   9  13   40.14    1.79
   1   9  15   11.15    1.28
  -7   0  13   59.49    1.20
  -6   0  18    7.71    1.08
  -6   4  12  310.04    2.45
  -6   4  13   73.18    1.60
  -6   4  14  217.59    2.38
  -5   5  16  111.18    2.09
  -1   8  16   57.50    1.61
  -6   3  16   74.68    1.75
  -5   1  19   30.22    1.51
  -5   3  18  204.83    2.63
  -5   5  10  193.99    1.87
  -4   1  20    5.96    1.14
  -4   6  16   38.42    1.63
   0   9  14   88.90    1.90
  -6   3  11  810.36    3.43
  -5   0  19    3.44    1.16
  -5   4  17   27.01    1.58
  -5   5  15  104.90    2.02
  -4   0  20  336.74    2.64
  -4   3  19   34.57    1.52
  -2   5  19   21.48    1.16
  -2   6  18   13.83    1.23
   0   8  16    6.58    1.30
  -6  -2  17    0.02    0.78
  -6   1  17   19.93    1.23
  -6   2  10   58.79    1.06
  -6   3  15  216.71    2.37
  -5   5  11   87.05    1.52
  -3   4  19    7.83    1.24
  -3   7   9    9.20    0.95
  -1   7  17    5.76    1.24
   1   9  14   71.84    1.85
  -6  -1  17   18.29    1.05
  -6   3  12   35.94    1.18
  -6   3  14    8.72    1.19
  -5   4   9   19.08    0.84
  -5   5  14  124.74    2.05
  -4   4  18  126.38    2.12
  -2   8  10    3.64    1.36
  -2   8  13    3.22    1.35
   1   8  16    0.67    1.19
  -6   3  13   15.28    1.14
  -5   4  16    1.45    1.38
  -4   6  14    2.66    1.35
  -2   8  11    4.18    1.49
  -1   6  18    7.10    1.10
   0   9   9    3.12    1.27
  -6   1  10    9.25    0.69
  -6   2  11   24.93    0.94
  -5   3  17   31.98    1.57
  -4   6  11   96.87    1.65
  -3   1  20   88.23    1.70
   0   7  17   24.89    1.26
  -6  -1  16    1.99    0.94
  -6   0  16  184.37    2.04
  -5  -2  18   36.23    1.13
  -5   4  10    2.28    0.77
  -5   4  15  137.89    2.15
  -4   5  16    4.01    1.42
  -4   6  12  300.91    2.66
  -4   6  13   78.89    1.79
  -3   3  19    2.65    1.23
  -2   4  19    0.67    1.10
  -2   6  17    8.10    1.25
  -1   8  14    2.43    1.33
   0   8  15    3.84    1.39
  -6   1  15   23.65    1.35
  -6   2  13   43.13    1.26
  -4  -2  19   17.85    1.03
  -4   3  18   28.99    1.56
  -2   5  18   -0.39    1.20
  -1   7  16   57.45    1.78
   1   7  17    5.18    1.04
  -6  -2  15  101.46    1.43
  -6   1  11   34.59    0.93
  -5   3  16    7.46    1.37
  -5   4  11  408.30    2.60
  -4  -1  19   34.80    1.38
  -3   5  17   22.94    1.50
  -6   1  12  152.83    1.68
  -6   1  14   54.59    1.33
  -5   4  12    1.42    1.02
  -5   4  13    4.50    1.17
  -4   5  15   21.52    1.53
  -3   6  15   15.75    1.48
  -1   4  19    0.33    0.99
  -1   8  13   10.89    1.43
   1   9  12   61.99    1.75
  -6  -2  14   65.23    1.24
  -6  -1  11   33.01    0.88
  -6   1  13  640.87    3.16
  -5   1  17    3.52    1.19
  -4   2  18   86.34    1.92
  -2   3  19   17.75    1.39
   0   8  14  194.59    2.57
   1   9  11   23.47    1.59
  -6  -2  13   39.63    1.05
  -6   0  14   61.30    1.28
  -5  -2  17   53.26    1.27
  -5   2  16  119.59    2.15
  -5   3  15    4.93    1.28
  -4   3  17   71.94    2.08
  -4   4  16   27.95    1.61
  -4   5  10    8.84    0.91
  -4   5  14    0.60    1.31
  -3   6  14   21.66    1.70
   0   7  16    1.27    1.27
   2   8  15   27.16    1.39
  -5  -1  17    1.76    1.08
  -5   0  17    7.71    1.12
  -5   3  10   21.37    0.86
  -3   3  18   27.21    1.52
  -3   5  16   20.09    1.53
  -2   4  18    7.57    1.46
  -2   5  17   97.78    2.10
  -2   7  13   50.17    1.66
  -5   3  14   85.86    1.70
  -4   5  12  233.69    2.31
  -3   4  17  153.66    2.33
   0   5  18    0.30    1.02
   0   8  13    1.24    1.55
   1   7  16   12.16    1.28
   1   8  14   32.16    1.72
  -5   1  16  189.65    2.18
  -5   2  15  133.16    2.08
  -5   3  12   15.75    1.03
  -5   3  13    4.54    1.06
  -4   0  18   24.34    1.38
  -4   4  15   47.54    1.67
  -3  -2  19   52.16    1.31
  -3  -1  19    2.34    1.19
  -3   0  19   69.99    1.74
  -3   6  12   -1.69    1.16
  -2   2  19    6.65    1.29
  -2   7  10   19.49    1.14
  -1   3  19    2.34    1.12
   2   7  16    3.49    1.19
  -4  -1  18   14.73    1.19
  -4   2  17   26.38    1.53
  -4   3  16    1.39    1.61
  -3   5  15   46.21    1.90
  -2   6  15  151.27    2.28
   0   7  15   39.50    1.69
  -5   2  10   10.82    0.73
  -3   2  18   34.22    1.57
  -1   4  18    4.57    1.21
   0   8   8    7.00    0.97
   0   8  12   14.82    1.39
   2   6  17    0.60    1.05
   2   8  14   55.05    1.70
  -5   2  14   52.84    1.40
  -4   4  14  220.12    2.41
  -3   4  16    1.34    1.62
  -2   3  18    8.43    1.29
  -2   5  16    7.51    1.38
   1   8  13    6.42    1.49
   3   8  14   11.96    1.31
  -5   2  11  189.55    1.67
  -5   2  13  134.18    1.69
  -4   4  10  124.37    1.44
  -4   4  13    4.73    1.13
  -3   5  14   91.64    1.85
  -2   6  14   40.34    1.58
  -1   7  13    1.98    1.25
  -5   0  15    5.77    0.94
  -5   2  12   15.41    0.93
  -4   2  16   49.42    1.60
  -4   3  15   52.16    1.60
  -4   4  11    7.74    0.89
  -4   4  12   64.87    1.40
  -2  -2  19    5.62    1.13
  -2  -1  19   66.58    1.63
   0   4  18   12.73    1.19
   1   7  15   15.73    1.39
  -5  -1  15   -0.36    0.78
  -4  -2  17   20.66    1.14
  -4  -1  17   14.23    1.24
  -3   5  13   60.88    1.71
  -2   6   8  282.91    1.97
  -2   6  13   30.31    1.42
  -1   7  12  299.20    2.67
   0   2  19   26.40    1.29
   0   7  14   11.67    1.31
   1   8  12    8.13    1.40
  -5  -3  14   65.15    1.13
  -3  -2  18   26.52    1.29
  -3   4  15   85.58    1.84
  -2   2  18   37.78    1.54
  -2   5  15   19.91    1.65
  -1   3  18    1.61    1.18
   1   4  18    1.56    0.98
   1   6  16   19.16    1.41
   2   7  15   72.56    1.69
  -5  -2  14   43.82    1.04
  -4   3  14   75.51    1.61
  -3   3  16   33.96    1.56
  -3   5  10   79.34    1.29
  -3   5  11  120.00    1.62
  -3   5  12   58.72    1.42
  -1   0  19  149.65    2.11
  -1   4  17  127.44    2.18
   1   5  17    3.60    1.11
   3   7  15    1.03    1.14
   3   8  13   47.34    1.65
   4   7  15   -0.27    1.05
  -5   0  13  381.84    2.32
  -4   2  15   51.90    1.49
  -2   3  17  123.75    2.10
  -2   4  16   34.72    1.57
  -1  -2  19    0.83    1.06
  -1  -1  19   17.16    1.34
   0   1  19   27.53    1.29
   0   7  13   32.59    1.55
   1   7  14  150.44    2.25
   2   6  16   31.92    1.41
  -5   0  11    2.07    0.59
  -4  -3  16    1.29    0.81
  -4   0  16  170.43    2.00
  -4   3  10    4.27    0.67
  -4   3  13   17.36    1.12
   0   3  18    9.69    1.21
   3   6  16   18.80    1.17
  -5  -2  11  176.06    1.38
  -5  -2  13  111.53    1.23
  -5  -1  13   17.50    0.81
  -4  -1  16   19.05    1.21
  -4   3  11  356.12    2.23
  -1   2  18   39.92    1.48
  -4   2  14   88.04    1.57
  -3   0  17    8.69    1.42
  -3   2  16    3.71    1.29
  -2   0  18   53.02    1.62
   0   4  17   -1.05    1.10
   0   5  16   97.02    1.83
   0   7  12   15.72    1.25
   1   3  18    8.17    1.14
   2   7  14    8.81    1.44
  -3  -3  17   -0.51    0.80
  -3   4  13  244.14    2.28
  -2  -1  18    8.26    1.26
  -2   2  17   -0.02    1.30
  -1   3  17   12.56    1.55
  -1   5  15    1.25    1.25
   0  -1  19   28.93    1.27
   1   6  15  169.37    2.16
   1   7  13   24.72    1.56
   3   8  12   52.93    1.54
  -4   2  13  529.80    2.90
  -3  -2  17   37.82    1.22
  -3   4   9  163.80    1.44
  -2   3  16    5.90    1.35
  -2   4  15   -0.39    1.25
  -2   5  13  109.63    1.78
  -1   1  18   53.75    1.58
   0   2  18    1.82    1.31
   0   7   8    1.72    0.83
   0   7  11  433.03    2.94
   1   4  17   10.18    1.29
   3   7  14   35.87    1.46
   5   7  14    5.32    1.16
  -3   4  12  146.67    1.74
   0   7   9    4.02    0.99
   1   5  16  151.87    2.04
   2   6  15   31.42    1.48
  -4  -2  15   41.59    1.01
  -4  -1  15   12.95    0.93
  -4   2  10   46.01    0.89
  -4   2  11    6.69    0.72
  -4   2  12  387.53    2.35
  -3   3  14   34.64    1.37
  -3   4  10   16.69    0.81
  -3   4  11  161.39    1.67
  -2   1  17    3.49    1.31
   2   4  17   -0.22    0.99
   3   8  11   41.80    1.49
  -3   2  15   26.03    1.36
  -2   5   9  133.62    1.45
  -2   5  11   89.60    1.52
  -1  -3  18    2.72    1.02
  -1   6   8  300.02    1.95
  -1   6  11   25.30    1.15
   0   3  17   14.84    1.27
   0   5  15  163.79    2.17
   1   7  12   23.98    1.31
   2   7  13    5.64    1.20
   3   4  17    1.73    0.92
   3   6  15   13.84    1.26
   4   6  15    0.37    1.12
  -4   0  14   86.51    1.36
  -2   2  16   25.11    1.67
  -2   5  10   16.15    0.87
  -1  -2  18   44.10    1.53
  -1  -1  18   58.03    1.66
  -1   2  17    6.97    1.32
  -1   6   9   41.73    1.00
  -1   6  10   93.78    1.42
   0   1  18    0.02    1.17
   0   4  16   88.83    1.80
   1   6  14    1.48    1.16
   2   2  18    3.13    0.96
   3   5  16   13.43    1.15
   4   5  16   45.23    1.29
  -3   3  13   49.95    1.32
  -2   3  15    3.14    1.24
  -1   3  16    1.15    1.28
  -1   4  15    1.74    1.25
   3   7  13   18.96    1.45
   3   8  10    9.38    1.18
  -4  -2  14   70.46    1.09
  -3  -2  16    3.19    0.87
  -3   1  15   30.25    1.32
  -3   2  14   79.40    1.55
  -2  -2  17   -0.29    1.16
  -2  -1  17    3.32    1.15
   1   1  18   35.63    1.35
   1   3  17    1.59    1.08
   4   7  13   98.97    1.94
  -4   1  11   33.66    0.85
  -3   3  12   27.44    1.03
   0  -3  18    9.88    1.14
   0   2  17   29.54    1.60
   1   4  16   44.88    1.46
   2   6  14   52.11    1.49
   2   7  12    4.13    1.15
   5   7  13    0.78    1.07
  -4  -1  13  108.31    1.33
  -3   3  10  157.89    1.42
  -3   3  11   92.94    1.27
  -2   1  16    2.18    1.26
   0  -2  18    1.36    1.12
   0   5  14   31.95    1.40
   1   7   7   30.16    0.90
   2   1  18    1.78    0.94
   3   3  17   10.02    1.11
   6   6  14   19.37    1.32
  -3   0  15  129.83    1.75
  -2   2  15    3.70    1.43
  -2   4  12  113.65    1.58
  -1   4  14    1.39    1.37
   0   3  16   29.70    1.64
   1   6  13   18.53    1.25
   1   7   9   36.29    1.10
   2   4  16   89.45    1.79
   3   6  14    0.59    1.15
  -3  -3  15    4.90    0.85
  -3  -1  15   29.49    1.22
  -1   2  16   28.05    1.48
   0   4  15   26.19    1.40
   1  -3  18    8.48    1.09
   1  -1  18   35.11    1.40
   2   0  18   45.24    1.36
   2   7  11  103.09    1.81
   4   6  14   63.05    1.68
  -4  -2  12  300.89    1.74
  -4  -1  12   54.08    0.92
  -3  -2  15   23.72    0.94
  -1  -1  17   23.28    1.53
   0   1  17   23.58    1.40
   1  -2  18   -0.74    1.05
   3   4  16    3.41    1.11
   5   5  15    2.62    1.06
  -4  -1  11   36.00    0.75
  -2   4   9   93.12    1.12
  -2   4  10  396.26    2.23
  -1   5  11   11.01    0.93
   0   5  13  160.61    1.99
   0   6  10  161.73    1.69
   2  -1  18    2.11    0.96
   2   6  13   53.11    1.46
   4   7  12    1.41    1.21
   6   7  12   -1.99    1.01
  -2  -3  16    5.79    0.93
  -2  -2  16   20.46    1.12
  -2   1  15   77.18    1.64
  -2   3  13  205.76    2.05
  -1   1  16    8.04    1.52
  -1   4  13    8.82    1.29
   0   6   8   20.53    0.78
   0   6   9   46.74    1.04
   1   4  15  198.44    2.40
   1   6  12   26.83    1.24
   2  -2  18    2.65    0.96
   2   7  10   13.80    1.16
   3   2  17   99.38    1.65
  -3   1  13    9.14    0.90
  -3   2  11  222.29    1.69
   0   2  16   17.32    1.38
   1   1  17   42.57    1.46
   3   7  11    2.33    1.19
  -3  -1  14    0.57    0.78
  -3   2  10   24.40    0.75
  -1   2  15   20.29    1.36
  -1   3  14   15.59    1.25
   0  -4  17   -0.27    0.92
   0   3  15   20.38    1.37
   0   4  14   11.42    1.23
   2   7   9   16.77    1.07
   3   6  13  142.67    1.97
  -3  -2  14   62.48    1.10
  -3   1  12   32.72    1.03
   0  -3  17   16.60    1.28
   0  -2  17   30.47    1.55
   0  -1  17   24.19    1.39
   1   6  11  142.90    1.75
   2   1  17   64.80    1.53
   2   4  15    0.19    1.13
   2   7   7  336.43    2.10
   2   7   8   43.68    1.14
   4   6  13    1.23    1.30
   6   6  13   24.98    1.43
  -1   4  12    5.56    0.96
   1   0  17    4.89    1.18
   2   6  12  135.77    1.84
   3   1  17    1.99    1.09
   3   5  14   20.87    1.44
   4   1  17   71.23    1.42
   4   3  16    6.23    1.06
   4   7  11    6.71    1.21
   5   6  13  116.54    1.90
   6   4  15    0.16    1.05
  -2  -1  15   78.25    1.50
  -2   1  14   45.41    1.33
  -2   2  13   76.41    1.43
  -2   3  11  134.89    1.45
  -1  -4  16    1.45    0.86
  -1  -1  16    8.38    1.22
   0   1  16   24.55    1.44
   1  -4  17   11.11    1.16
   3   4  15  122.97    1.85
   5   4  15   24.51    1.31
   5   7  11   -0.24    1.20
   6   5  14    3.07    1.12
   6   7  11   39.74    1.31
  -3   1  11    1.81    0.61
  -2  -3  15    3.82    0.89
  -2  -2  15    4.09    1.05
  -1  -3  16    0.23    1.13
  -1  -2  16   28.20    1.47
  -1   1  15   14.06    1.31
   0   4  13    5.80    1.11
   1   6  10   18.20    0.97
   4   5  14    4.24    1.09
   5   5  14   81.57    1.70
  -3  -2  13  144.39    1.43
  -2   3  10   84.73    1.12
  -1   3  13    6.82    1.07
   0   2  15   17.31    1.35
   1  -3  17    1.57    1.13
   1  -2  17   69.86    1.70
   1   6   9    5.67    0.87
   3   0  17  146.55    1.94
   3   6  12   75.60    1.58
   3   7   9   81.28    1.49
   0   0  16    1.41    1.28
   0   3  14   20.85    1.30
   2   6  11   18.52    1.11
   4   7  10    6.64    1.12
  -2   1  13    2.66    0.91
  -1   4  10    1.89    0.69
   1   1  16    2.32    1.25
   2  -3  17   84.85    1.68
   2  -2  17   80.66    1.75
   2   3  15  231.88    2.40
   2   4  14   77.70    1.80
   3   7   8   36.55    1.16
   4   2  16    9.08    1.09
   4   6  12    2.41    1.12
   5   2  16    3.64    0.93
   7   6  12    6.59    1.06
  -3  -1  12   30.45    0.79
   0  -4  16   90.93    1.63
   0  -1  16   25.30    1.43
   0   5   9  251.05    1.78
   3   5  13    1.75    1.29
   4  -1  17   70.21    1.37
   5   6  12    4.20    1.36
   5   7  10   80.55    1.51
   6   6  12   71.05    1.80
   7   4  14    2.14    1.20
  -3  -2  12   32.86    0.76
  -2  -1  14   42.18    1.17
  -2   2  11    6.62    0.72
  -1   3  12    4.87    0.92
   0  -3  16   30.07    1.48
   0   1  15   32.76    1.67
   0   4  12    7.87    1.02
   1   4  13  588.14    3.34
   2   1  16   35.94    1.43
   2   6  10   64.90    1.39
   3  -3  17   10.77    1.05
   3  -2  17  116.04    1.74
   3   3  15    8.51    1.17
   4   7   9  304.70    2.38
   6   7  10   -1.26    0.83
  -3  -1  11    1.99    0.62
  -2  -3  14    2.06    0.80
  -2  -2  14   17.95    0.93
  -1  -4  15    2.03    0.93
  -1  -1  15   14.19    1.22
  -1   1  14   29.17    1.30
  -1   2  13  148.32    1.82
   1  -5  16  142.42    1.78
   1   3  14    2.38    1.18
   3   4  14   -0.69    1.13
   3   6  11   87.49    1.57
   4   3  15   70.12    1.53
   4   5  13   25.62    1.29
   5   3  15    1.86    1.09
   6   5  13  100.11    1.89
  -2   1  12    0.80    0.76
  -2   2  10   37.88    0.84
  -1  -3  15    0.50    1.05
  -1  -2  15   21.26    1.18
   0   2  14    8.54    1.23
   3   1  16   72.79    1.58
   4   1  16    4.46    1.16
   5   1  16   21.66    1.13
   5   4  14    8.05    1.32
   5   5  13    0.03    1.16
   6   4  14   70.32    1.58
  -3  -2  11  216.25    1.41
  -1   3  11    1.09    0.76
   0   4  11   50.38    1.17
   2   0  16    3.34    1.43
   2   2  15    1.09    1.25
   2   6   9  106.18    1.40
   4   7   8   52.23    1.26
   5   7   9   63.44    1.43
  -3  -3  11   87.17    0.92
   1  -4  16   51.15    1.44
   1   5  10    9.44    0.99
   2   4  13   18.12    1.24
   1  -3  16   49.78    1.58
   1   1  15    7.40    1.32
   2  -5  16    9.50    1.13
   2   3  14    3.49    1.19
   3   2  15   41.70    1.62
   3   6  10   -0.25    0.91
   5   6  11   13.41    1.21
   6   2  15   23.12    1.23
   6   6  11    2.97    1.40
   7   6  11   35.60    1.31
   8   5  12   17.62    1.27
  -1   1  13   15.54    1.07
  -1   2  12  204.01    1.87
  -1   3  10  139.23    1.37
   0   4  10   40.30    0.98
   2   5  11   72.57    1.40
   2   6   7    9.90    0.73
   4   0  16  124.14    1.83
   4   2  15   29.78    1.47
   5   2  15   12.34    1.26
  -1  -1  14   28.46    1.22
   0   1  14    6.26    1.21
   1   2  14   14.02    1.28
   1   3  13   15.31    1.20
   2  -4  16   91.50    1.72
   2  -2  16   79.55    1.90
   3  -5  16   11.62    1.08
   3   3  14    7.43    1.21
   4   5  12    1.49    1.26
   7   3  14   36.98    1.32
   7   5  12   60.61    1.77
  -2   1  10  285.59    1.69
  -1  -4  14    2.27    0.88
   0  -3  15   23.46    1.40
   0  -2  15   15.73    1.25
   0   2  13    5.66    1.09
   1   0  15   13.45    1.36
   2  -3  16   41.48    1.54
   3  -1  16   75.16    1.64
   3   6   9  188.51    1.85
   4  -1  16    3.68    1.19
   4   6  10  162.15    1.95
   5  -1  16   23.03    1.13
   5   5  12   16.89    1.44
   7   4  13   90.32    1.81
  -2  -1  12    0.70    0.65
  -1  -2  14  110.00    1.57
   0   4   9   97.99    1.16
   1   5   8  401.35    2.08
   3  -4  16    3.61    1.23
   4   3  14   14.33    1.24
   5   3  14   90.38    1.69
   6   4  13    7.41    1.34
   6   5  12    0.44    1.26
  -1   0  13   18.19    1.07
   0   0  14   51.89    1.50
   2   2  14   33.91    1.44
   2   4  12  138.79    1.81
   2   5  10    9.84    1.03
   3  -3  16    5.51    1.26
   3   1  15    0.93    1.20
   3   5  11   20.07    1.13
   4  -4  16    1.90    0.97
   5  -3  16    3.51    1.01
   5   6  10    8.91    1.23
   6   1  15   13.07    1.12
   9   4  12    4.26    1.24
   9   5  11    4.02    1.06
  -2  -2  12    2.30    0.70
  -1   1  12  362.23    2.33
   0   3  11  329.18    2.20
   1  -5  15   10.70    1.03
   1   1  14   92.43    1.79
   2   3  13  356.76    2.72
   3   6   8  114.63    1.42
   4   1  15    3.33    1.14
   5   1  15    6.23    1.07
   6   6  10   19.65    1.43
   7   6  10   12.09    1.23
   0   1  13   75.46    1.65
   1  -4  15  221.49    2.33
   1  -2  15   88.42    1.97
   1   3  12  105.39    1.60
  -2  -1  11   75.26    1.04
  -1  -1  13   14.95    1.01
  -1   2  10  176.04    1.45
   0   2  12    7.70    0.97
   1  -3  15   28.37    1.40
   1   2  13   31.28    1.31
   3   0  15   24.74    1.59
   3   2  14   10.04    1.26
   4   5  11  142.84    1.83
   4   6   9  212.80    1.96
   7   2  14    2.55    1.09
   8   3  13   41.59    1.50
   8   5  11   99.78    1.89
   1   4  10   11.55    0.84
   2  -1  15    6.64    1.33
   2   5   9   20.22    0.84
   3   3  13   26.54    1.32
   3   6   7  100.14    1.21
   4   2  14    3.62    1.18
   6   2  14   18.80    1.19
   8   4  12   34.29    1.53
   0  -2  14    7.56    1.12
   0   3  10   19.50    0.81
   2  -5  15   97.01    1.65
   3   5  10    4.16    0.90
   5   0  15   28.68    1.25
   5   2  14   44.98    1.43
   5   5  11    8.86    1.16
   5   6   9    4.30    1.13
   6   5  11  122.68    2.04
   7   3  13    1.11    1.30
   7   5  11    3.15    1.29
   8   1  14    7.47    1.06
  -2  -2  11    6.00    0.56
  -1  -3  13    5.32    0.79
   0  -3  14   22.72    1.16
   2  -4  15   -0.36    1.32
   2  -3  15  294.63    2.84
   2  -2  15    1.91    1.28
   3  -1  15    0.72    1.24
   4  -6  15    0.32    1.00
   4   3  13    1.71    1.16
   7   4  12    2.05    1.31
   0   2  11   11.94    0.86
   1   3  11  277.77    2.09
   2   2  13  176.27    2.08
   2   5   8  280.03    1.80
   3  -5  15    3.47    1.22
   5   3  13    5.74    1.20
   5   4  12   11.15    1.19
   6  -1  15   13.63    1.13
   6   4  12    7.27    1.19
   6   6   9   13.99    1.28
  -1  -1  12  390.34    2.29
   0   1  12   77.40    1.37
   0   3   9  637.96    2.52
   1   1  13    7.78    1.16
   3   1  14   16.80    1.34
   4   5  10   35.85    1.31
   5  -1  15    6.51    1.09
   7   1  14   23.63    1.23
   9   5  10   29.74    1.21
  -1   1  10  193.17    1.47
   1  -5  14   92.62    1.56
   1   2  12    6.80    1.02
   2   0  14  236.02    2.47
   3  -3  15    9.26    1.27
   3   5   9   83.09    1.34
   4  -5  15   12.35    1.17
   4   1  14   16.49    1.30
   5  -5  15    2.51    0.97
   5  -2  15   12.69    1.29
   6  -4  15    0.94    1.00
   6   1  14    1.27    1.06
   8   0  14   12.75    1.09
  -1   0  11  825.57    3.04
   1  -2  14   16.13    1.31
   3   2  13   59.35    1.54
   3   3  12   11.19    1.14
   4   6   7   12.82    0.81
   5  -4  15   24.03    1.28
   5   1  14    4.80    1.17
   8   5  10    4.02    1.35
  -1  -2  12  204.50    1.66
   1  -3  14    2.12    1.15
   7   2  13    7.46    1.36
  -1  -4  12    4.97    0.60
  -1  -3  12    4.50    0.67
   0  -2  13    7.40    1.01
   0   0  12  310.86    2.32
   0   2  10  123.60    1.31
   1   0  13   72.61    1.57
   2  -1  14    2.28    1.29
   2   1  13    2.07    1.17
   4   2  13    0.14    1.17
   4   4  11   38.37    1.27
   4   6   6  252.67    1.74
   6   5  10    5.82    1.14
   6   6   8    6.02    1.09
   7   5  10   64.02    1.61
   8  -1  14    5.73    0.99
   8   3  12   -0.48    1.35
   0  -4  13    5.71    0.82
   0  -3  13  334.16    2.34
   0   1  11  439.58    2.42
   2   2  12   16.86    1.15
   4   0  14    2.43    1.23
   4   3  12    2.50    1.12
   5   2  13   10.57    1.23
   6   0  14    1.44    1.07
   6   2  13    8.83    1.21
  10   3  11    2.30    1.39
   1   1  12   56.58    1.34
   1   2  11  379.10    2.37
   2  -5  14    2.96    1.13
   3  -1  14   18.33    1.60
   3   5   8  151.52    1.44
   4   5   9   10.78    0.91
   5   4  11  369.90    2.71
   5   6   7   62.98    1.26
   6   4  11   54.87    1.49
   7   4  11  191.62    2.28
   8   1  13   14.02    1.34
  10   4  10   52.31    1.39
   2  -4  14   95.93    1.76
   3   1  13  221.40    2.31
   7  -1  14   23.93    1.24
   9   0  13    5.27    1.18
   9   2  12   21.62    1.45
   9   5   9    1.00    1.14
   0   2   9    1.40    0.59
   1   3   9    5.80    0.65
   4  -1  14   16.98    1.36
   5   5   9    0.22    1.04
   6  -1  14    0.80    1.07
   3  -5  14   22.04    1.33
   3   2  12   10.37    1.15
   3   5   7  205.68    1.51
   4  -6  14   62.18    1.46
   4   1  13    6.92    1.24
   5  -6  14    8.57    1.12
   5  -1  14    3.46    1.19
   6  -6  14   17.32    1.01
   7   1  13    6.22    1.17
   8   5   9   42.62    1.56
  11   3  10   11.61    1.13
  11   4   9   89.76    1.48
  -1  -3  11    1.27    0.54
   0   1  10   22.71    0.79
   2   3  10   27.81    0.97
   2   4   8  210.33    1.53
   3  -4  14   -0.18    1.23
   3  -3  14   10.37    1.34
   4  -2  14    2.98    1.27
   4   5   8   44.15    1.11
   5   1  13   84.22    1.72
   5   6   6   60.69    1.06
   6  -2  14   19.19    1.38
   6   1  13   33.06    1.40
   6   5   9   15.12    1.10
   7  -4  14    0.76    0.99
   7  -3  14   30.28    1.19
   7   5   9   51.38    1.56
   0  -5  12  307.49    1.88
   0  -2  12    6.93    0.88
   1  -4  13  810.39    3.62
   1   2  10   15.81    0.82
   2  -1  13    2.67    1.41
   2   1  12    1.98    1.06
   2   2  11   67.94    1.44
   3   0  13   41.26    1.50
   4  -3  14   16.17    1.57
   6  -5  14    1.52    1.02
   9  -1  13   41.15    1.34
   0  -4  12    8.40    0.86
   0  -3  12   73.91    1.23
   1   1  11   18.82    0.97
   4  -4  14   45.59    1.53
   4   3  11   35.81    1.26
   5   2  12    0.14    1.36
   6  -4  14   69.81    1.53
   7   2  12   36.67    1.47
   8   3  11    4.41    1.28
   8   4  10  188.89    2.37
   2  -6  13   55.18    1.26
   6   2  12  219.67    2.32
   6   4  10   14.84    1.16
   7   0  13   19.50    1.27
   7   3  11    4.66    1.45
   7   4  10    4.64    1.23
   9  -2  13   48.99    1.32
  10   0  12   94.25    1.83
  -1  -2  10  151.57    1.22
   1  -1  12   45.26    1.29
   3   1  12    5.38    1.14
   5   0  13    9.32    1.28
   5   5   8    4.13    0.84
   9   5   8   11.97    1.19
  10   4   9   33.39    1.47
   2  -5  13   34.96    1.24
   2  -3  13  487.52    3.28
   2   0  12  219.00    2.15
   2   3   9   51.06    0.98
   3  -1  13  230.13    2.42
   4  -7  13  101.65    1.65
   4   5   7  365.19    2.03
   8   1  12   54.19    1.73
  -1  -4  10    0.70    0.51
  -1  -3  10  134.93    1.11
   0   0  10  425.99    2.15
   2  -4  13   20.92    1.29
   3  -6  13  153.89    2.00
   3   2  11   78.64    1.44
   6  -7  13   35.14    1.22
   6   5   8  193.66    1.96
   7  -1  13    4.91    1.14
   8  -2  13    7.62    1.21
   8   5   8    7.41    1.26
   9   2  11   39.35    1.67
   1  -2  12    5.83    1.03
   1   0  11  744.64    3.20
   2   1  11  204.45    1.90
   3   4   8    2.05    0.63
   4  -1  13    6.82    1.31
   5  -7  13    0.50    1.00
   5  -1  13  112.15    2.06
   7   1  12   23.26    1.55
   7   5   8    2.35    1.04
   9   4   9   28.85    1.58
  10  -1  12    6.18    1.17
   1  -5  12  394.14    2.37
   1   1  10  250.91    1.80
   3  -5  13    2.35    1.34
   4   2  11  112.98    1.66
   5   1  12    7.47    1.23
   5   4   9   48.33    1.32
   6   1  12   45.68    1.50
   7  -6  13   58.20    1.38
   8  -5  13   38.01    1.17
   8  -3  13   42.02    1.33
  11   3   9    8.23    1.28
  11   4   8    1.58    0.98
   0  -5  11    3.27    0.60
   0  -3  11  331.24    1.98
   1  -4  12   97.03    1.44
   2  -1  12    2.32    1.11
   3  -4  13   13.38    1.33
   4  -6  13    1.31    1.17
   4  -2  13    1.22    1.28
   5   5   7    5.53    0.82
   7  -2  13    9.24    1.17
   8   4   9    3.34    1.46
  10  -2  12   15.52    1.26
   5  -6  13  119.80    1.84
   5  -2  13   10.47    1.31
   5   2  11    2.47    1.11
   6  -6  13   24.74    1.25
   6   4   9   19.14    1.13
   7  -5  13   10.05    1.13
   7  -3  13    1.70    1.06
   7   4   9   10.87    1.38
   8   0  12  259.87    2.52
  12   2   9    1.60    1.17
   3   3   9   92.95    1.25
   4  -4  13    9.29    1.31
   4   4   8  125.54    1.41
   6  -5  13  105.60    1.87
   6   3  10   86.31    1.73
   7   3  10   58.86    1.54
   9  -1  12  116.82    1.94
  10   2  10   95.77    2.31
  12   3   8   43.06    1.26
   2  -6  12  141.91    1.62
   3   1  11   96.01    1.53
   3   2  10    7.05    0.88
   5  -4  13   -0.12    1.21
   6  -4  13    7.68    1.20
   6   5   7  127.78    1.50
   9   5   7   15.86    1.08
  10   4   8   26.46    1.44
  11  -1  11    6.50    1.35
   8   5   7    9.05    1.15
   9  -2  12   20.30    1.38
   0  -2  10  123.87    1.22
   1   1   9   72.82    1.01
   2  -5  12  113.16    1.59
   2  -4  12  160.90    1.99
   2   1  10   32.64    0.98
   2   2   9  545.86    2.44
   4   1  11    9.99    1.12
   5   5   6    3.93    0.74
   8  -1  12   54.67    1.54
   8   1  11    2.87    1.50
   4  -1  12   42.52    1.48
   5   4   8   19.89    0.93
   7  -1  12   23.41    1.56
   9  -3  12   10.02    1.17
   9   2  10    3.02    1.39
   0  -3  10   18.95    0.69
   1  -3  11  271.10    2.05
   3  -6  12   76.60    1.52
   4  -7  12    1.21    1.01
   4   2  10  100.74    1.47
   5  -1  12    7.58    1.27
   5   1  11   21.16    1.25
   6   1  11   22.14    1.49
   7   1  11   46.81    1.51
   9   0  11    6.39    1.53
   9   3   9    2.77    1.40
  11   4   7   17.37    1.08
   0  -4  10   40.83    0.76
   2  -1  11  172.76    1.81
   4   4   7    9.98    0.67
   6  -7  12    0.52    1.12
   7   4   8    2.99    1.20
   8  -6  12   31.87    1.19
   8   4   8    7.03    1.17
  11   3   8   14.39    1.30
  12   1   9   37.87    1.74
   3  -4  12  186.60    2.14
   5   2  10  146.36    1.76
   7  -2  12   38.97    1.46
   8  -5  12   18.29    1.23
   8   3   9   17.00    1.34
   4  -6  12    3.69    1.20
   5  -2  12    1.25    1.24
   6  -2  12  211.56    2.33
   6   2  10   30.53    1.27
   6   3   9   11.17    1.06
   7  -6  12    9.02    1.16
   7   5   6   11.89    1.03
  10  -2  11   18.58    1.42
  12   2   8   46.29    1.57
  13   1   8   20.60    1.20
   1   0   9  145.40    1.30
   2   0  10  453.23    2.44
   4  -5  12    1.05    1.20
   5  -6  12    3.30    1.22
   6  -6  12   72.44    1.61
   7  -5  12   61.47    1.62
   7  -3  12   57.55    1.55
   8   5   6   -0.91    0.84
   9  -1  11   20.95    1.37
  10   4   7    5.93    1.13
  12   3   7    3.35    1.09
   2   1   9    4.24    0.66
   5  -5  12   17.18    1.53
   5   0  11   34.44    1.34
   5   4   7   88.70    1.16
   6  -3  12    4.29    1.25
   7   0  11   64.15    1.61
   8  -8  11   27.16    1.06
  10  -3  11    3.11    1.12
  10   3   8    2.29    1.47
   9  -7  11    4.10    0.94
  10  -4  11    2.65    1.05
  10   0  10    2.20    1.37
  11   1   9    3.31    1.73
  13   2   7   10.99    1.00
   2  -5  11   76.07    1.30
   3  -7  11    1.83    0.90
   4  -1  11    8.88    1.15
   6   4   7    4.49    0.91
   6   5   5    8.64    0.75
   7  -8  11    3.08    1.05
   8  -1  11    3.21    1.25
   8   1  10    3.72    1.27
   9  -2  11   38.37    1.43
   5   1  10  412.24    2.62
   5   3   8  195.39    1.73
   6  -8  11   54.17    1.40
   8   4   7   29.07    1.22
   9  -6  11   45.19    1.34
  11   4   6   -1.08    0.95
   1  -4  10   11.50    0.79
   3  -6  11  102.44    1.62
   5  -1  11   21.26    1.28
   6  -1  11   20.20    1.31
   6   1  10   78.07    1.53
   7  -1  11   47.51    1.51
   7   5   5   18.12    0.89
   8  -7  11   31.53    1.25
   8   2   9    7.27    1.46
   9  -3  11    7.97    1.16
  11  -2  10    2.07    1.33
  11   3   7    0.59    1.31
   1  -1   9   77.10    1.02
   3   1   9   61.31    1.07
   3   2   8   49.18    0.89
   4  -7  11    5.36    1.04
   6   3   8   -0.34    0.84
   8   3   8    5.53    1.17
   9  -4  11   20.10    1.26
  10  -1  10   -0.34    1.33
  12  -1   9   44.34    2.02
  12   1   8    2.62    1.66
   3  -4  11    6.81    1.09
   5  -7  11    0.09    1.25
   5   4   6   95.82    1.12
   7  -7  11    2.16    1.22
   7   3   8   12.31    1.05
   8  -6  11    1.88    1.21
  10   4   6   15.14    1.23
  11  -3  10   10.14    1.25
   4  -6  11   -1.01    1.16
   4   3   7   10.14    0.62
   5  -2  11    3.22    1.18
   6  -7  11   49.58    1.44
   6  -2  11  135.24    1.94
   8   0  10    9.67    1.30
  11  -4  10   11.29    1.12
  12   2   7    6.84    1.37
  12   3   6    6.93    1.16
   3  -1  10  305.21    2.15
   7  -6  11   40.56    1.53
   7  -3  11    3.16    1.42
   8  -4  11   32.54    1.35
  10  -2  10   83.47    1.78
  10   2   8   10.61    1.57
  13   1   7   13.00    1.23
   2  -3  10   33.02    1.11
   4  -5  11  153.52    1.96
   5  -6  11   12.58    1.22
   5  -3  11    0.05    1.19
   6  -6  11    1.93    1.35
   6  -3  11  193.65    2.20
   6   0  10  211.10    2.09
   6   4   6  128.86    1.31
   7  -5  11    4.53    1.37
   9  -8  10    1.44    0.87
   9  -1  10    7.22    1.33
   9   4   6    4.61    1.06
   5  -5  11    8.91    1.24
  10  -6  10    4.79    1.05
  10  -3  10   11.77    1.23
  11  -1   9    2.50    1.50
  13   2   6    2.12    1.01
  14   1   6    7.97    0.90
   2  -5  10    9.84    0.80
   2  -4  10   16.77    0.90
   2  -1   9    3.57    0.67
   3  -2  10    6.42    0.92
   4  -1  10   63.71    1.32
   5   1   9    3.39    0.87
   5   3   7   43.76    0.91
   8  -8  10    1.11    1.07
   8  -1  10    3.28    1.24
   8   1   9   26.87    1.36
   9   3   7  101.95    1.80
  10  -5  10   14.16    1.24
  10  -4  10   50.61    1.45
  12  -4   9    0.66    1.15
   1  -6   9    5.18    0.53
   3  -7  10   36.70    1.04
   5   2   8   18.65    0.86
   6   1   9   62.95    1.32
   7   1   9   12.50    1.12
   9  -7  10    9.32    1.04
   9  -2  10    4.30    1.27
  11   3   6   67.10    1.66
  13  -2   8   48.18    1.65
   1  -5   9   28.39    0.76
   1  -4   9  712.75    2.51
   5  -8  10    2.64    1.11
   6  -1  10   77.27    1.54
   6   3   7    2.74    0.72
   7  -8  10   16.69    1.16
   7   3   7  117.53    1.48
   8   2   8   38.97    1.36
   8   3   7  124.92    1.70
  11  -2   9    2.23    1.62
  13   0   7   86.21    2.05
   3  -6  10    1.06    0.97
   8  -2  10  128.30    1.92
   9  -6  10   50.55    1.40
   9  -3  10  100.48    1.79
   9   0   9   29.30    1.47
  10   4   5    3.71    1.03
   3  -5  10    4.16    1.08
   3  -4  10   16.80    1.01
   4  -7  10    7.08    1.14
   9  -9   9   14.88    1.00
   9  -4  10    1.26    1.14
   5  -2  10  132.09    1.74
   7  -2  10    1.62    1.16
   8  -3  10    3.49    1.20
   9   4   5    5.30    1.05
  10  -8   9    0.33    0.83
  11  -3   9    9.00    1.30
  12   3   5    7.88    1.02
  14   0   6   28.61    1.19
   4   1   8   28.54    0.82
   5   0   9  404.85    2.39
   6  -7  10    1.07    1.21
   7   0   9  105.00    1.63
   8  -6  10    2.35    1.06
  11  -5   9    0.25    1.10
  13   1   6    2.29    1.22
   2  -3   9   48.64    0.95
   4  -4  10   17.82    1.15
   5  -3  10   16.20    1.17
   5   3   6   75.19    0.95
   8  -9   9    6.89    0.94
   8  -4  10  169.77    2.06
   9  -1   9   12.95    1.35
  10  -2   9   19.65    1.46
  13   2   5   18.55    1.21
   2  -6   9  108.77    1.21
   6  -6  10   18.79    1.44
   6  -3  10   86.75    1.61
   7  -6  10   11.83    1.20
   7  -5  10   65.21    1.69
   9  -8   9    4.76    1.09
   9   3   6  458.03    2.89
  10  -7   9   35.69    1.22
  11   1   7    9.12    1.71
  14   1   5    3.95    0.95
  15   1   4   32.76    0.94
   5  -5  10    7.82    1.13
   6  -5  10    8.46    1.17
   6   1   8   26.39    1.11
   7   1   8  147.17    1.77
   8  -1   9   27.00    1.32
  10  -3   9   66.25    1.65
   5  -1   9    3.95    1.04
   7   3   6  168.84    1.53
   8   2   7   27.94    1.16
   8   3   6   65.96    1.28
   9  -2   9   46.45    1.53
  10  -5   9   30.22    1.43
  10  -4   9   33.89    1.38
  11   3   5    2.00    1.07
  12  -4   8   44.65    1.53
  15  -1   5    0.55    0.85
   3  -7   9   76.67    1.13
   6  -1   9   59.98    1.30
   7  -1   9   10.95    1.12
   7   2   7   35.43    1.05
   8  -8   9    2.75    1.10
  10  -9   8    2.17    0.85
  10   4   4    4.51    0.86
  11  -8   8    1.00    0.82
   4  -2   9  144.95    1.54
   4   0   8   60.15    0.99
   9  -7   9   47.02    1.34
   9  -3   9    0.97    1.39
  11  -2   8   19.86    1.59
  12   1   6    1.33    1.49
   3  -6   9  190.37    1.66
   5  -8   9  405.42    2.45
   7  -8   9    7.47    1.07
   8  -2   9    7.01    1.17
   9  -6   9   21.34    1.36
   9   4   4    1.10    0.85
  10  -1   8   28.39    1.54
  12   3   4    7.61    1.03
   3  -4   9    4.49    0.76
   3  -1   8  486.35    2.16
   4  -7   9  319.24    2.19
   5  -2   9   15.25    0.98
   6  -8   9   18.95    1.12
   7  -2   9  103.01    1.61
   7   4   4    1.13    0.58
   8   0   8  600.90    3.15
   9  -5   9    2.12    1.09
  11  -7   8   12.13    0.99
  11  -3   8   14.83    1.63
  12   2   5   12.05    1.22
  13  -5   7    1.95    1.07
   6  -2   9    2.52    0.97
   9  -9   8   18.56    1.08
  10  -8   8    7.27    1.01
  11  -6   8    5.36    1.17
  13   1   5    1.86    1.18
   4  -6   9  241.03    2.01
   7  -7   9    9.81    1.08
   8  -6   9   28.62    1.23
   8  -4   9    2.29    1.29
   9  -1   8  275.19    2.44
  10 -10   7   14.91    0.84
  10  -2   8    6.96    1.35
  11  -4   8    2.35    1.20
   4  -5   9    8.94    0.94
   4  -4   9   36.93    1.09
   5  -3   9    6.71    0.94
   6  -3   9    7.74    1.02
   7  -3   9    1.49    1.05
   9   2   6    8.23    1.06
  14   2   3   16.98    0.95
   2  -6   8    5.99    0.60
   3  -2   8   48.85    0.95
   5  -6   9    5.11    0.99
   7  -6   9   82.30    1.51
   7  -4   9    9.55    1.11
   8  -9   8   23.45    1.04
   8   3   5   88.63    1.24
  10  -7   8   26.13    1.23
  11   2   5    2.13    1.37
   2  -5   8  276.10    1.57
   2  -4   8  238.35    1.50
   5  -5   9   -0.51    0.93
   6  -6   9   13.16    1.11
   8  -1   8    3.70    1.05
   8   2   6  110.19    1.41
   9  -8   8   15.91    1.12
  10  -3   8    2.73    1.23
   9  -2   8   31.27    1.34
  10  -4   8   24.66    1.31
  12  -6   7    5.71    0.99
  12  -4   7   10.05    1.23
  16  -1   3   18.38    0.75
   3  -7   8   31.07    0.85
   9   0   7   92.59    1.60
   9   4   3   95.50    1.17
  10  -5   8    0.68    1.09
   8  -8   8   19.00    1.10
   8   4   3   70.21    0.99
  10  -9   7   24.51    1.00
  10  -1   7  137.96    2.02
  13  -3   6    2.38    1.53
   3  -6   8  113.44    1.19
   3  -5   8  147.23    1.37
   5  -8   8   -0.10    0.81
   6  -8   8  110.87    1.54
   7  -8   8    7.90    1.01
   9   1   6   31.51    1.18
  11  -7   7    7.12    1.05
  13  -6   6   -0.20    0.90
  13  -4   6    1.97    1.13
   4  -7   8   48.91    1.00
   8  -7   8   19.92    1.10
   8  -3   8    2.98    1.02
  13   2   3   17.28    0.98
   4 -13   6    0.68    0.75
   4  -7   6   18.07    0.99
  10  -6   0   54.62    1.04
  11 -13  -1    1.14    0.72
   3 -10   7    2.47    0.67
   6 -12   5   12.04    0.81
   7 -15   3    1.34    0.62
   8 -15   2    1.16    0.60
   8  -7   3    8.73    0.96
  10  -8   1    6.84    0.91
  10  -3  -3    3.52    0.43
  13 -11  -4    2.70    0.84
  13 -10  -4   15.30    0.88
  13  -9  -4   56.83    1.18
   5 -10   6    0.47    0.76
   9  -7   2    2.41    0.87
   9  -5   1    2.39    0.81
  11 -11   0    9.77    0.97
  11 -10   0    6.39    0.89
  11  -9   0  130.55    1.51
  12 -12  -2   18.17    0.86
  13  -7  -5    9.01    0.89
   9  -3  -1  130.98    1.04
  10 -13   1    2.86    0.83
  11  -5  -2   80.83    1.07
  12  -6  -3   35.08    1.00
  13 -12  -4    5.60    0.71
  13  -8  -4   13.79    0.96
   5 -12   6    0.60    0.77
   5  -8   6   54.81    1.28
   6 -13   5    2.81    0.70
  11 -14  -1   11.68    0.67
  11 -12   0    6.66    0.76
  11  -8   0   65.45    1.21
  11  -6  -1   14.08    0.82
  11  -4  -3  156.13    1.23
  12  -5  -4    1.67    0.63
   8 -14   3    2.04    0.65
   8 -10   4   12.54    1.19
   9 -14   2    2.76    0.69
   9  -6   2   35.39    1.16
  10  -4  -1    3.53    0.57
  12 -13  -2    5.47    0.66
  12  -7  -2  145.82    1.48
   8  -9   4   11.23    1.06
   9  -9   3   26.31    1.09
  10 -10   2   62.91    1.36
  11  -7   0  242.00    1.91
  12 -11  -1    3.01    0.88
  12 -10  -1    0.87    0.80
  13 -11  -3    5.73    0.80
  13 -10  -3   65.59    1.14
  13  -9  -3   13.39    0.99
  13  -7  -4   17.71    0.92
  13  -6  -5   11.37    0.85
  14 -11  -6    5.60    0.66
  14 -10  -6   41.26    0.92
   3  -7   7    1.40    0.58
   7 -11   5    3.06    0.81
   9 -12   3    4.68    0.95
   9  -8   3   55.38    1.39
  10 -14   1    1.24    0.60
  10 -11   2    1.13    0.83
  10  -9   2   41.77    1.15
  10  -6   1   81.27    1.22
  14  -9  -6    1.88    0.69
   8  -4   2  146.39    1.33
   8  -3   1  130.99    1.11
  11  -3  -4   82.82    0.91
  12 -12  -1    4.65    0.76
  13  -8  -3    2.09    0.80
  14  -8  -6    5.95    0.81
   7 -12   5   11.87    0.81
  10  -8   2   40.56    1.14
  11 -11   1    0.02    0.77
  11  -9   1    5.37    0.91
  11  -5  -1  171.20    1.45
  11  -4  -2    6.91    0.72
  12  -6  -2   68.75    1.11
  12  -5  -3   72.76    1.05
  14 -10  -5    1.09    0.73
   6  -9   6    7.50    0.93
   8  -7   4    4.87    1.06
   8  -5   3  224.59    1.81
  12 -13  -1   33.02    0.86
  13  -6  -4   14.57    0.93
  14 -11  -5    1.62    0.61
  14  -9  -5   13.01    0.81
   9  -5   2  185.40    1.60
  10 -13   2   -0.06    0.71
  11 -12   1    2.12    0.74
  11  -8   1    3.64    0.90
  12  -7  -1   90.01    1.30
  12  -4  -4    1.84    0.68
  13 -10  -2    4.87    0.80
  13  -7  -3    2.57    0.78
   3  -6   7   89.65    1.02
  14  -8  -5    9.82    0.81
   4  -7   7  211.76    1.68
  10  -3  -1   23.84    0.65
  11 -13   1    0.96    0.70
  11  -7   1   84.07    1.43
  11  -3  -3   14.28    0.57
  12 -11   0    4.16    0.75
  12  -9   0   59.11    1.18
  13  -8  -2    1.97    0.93
   5 -11   7    1.99    0.76
   8 -14   4   21.94    0.73
   9 -10   4    5.59    0.96
   9  -6   3   35.87    1.15
  10 -10   3   13.75    1.11
  12 -12   0    4.28    0.70
  12  -8   0  232.14    1.87
  12  -6  -1  112.28    1.44
  14 -11  -4    6.74    0.65
  14  -9  -4    5.00    0.76
   8  -9   5    6.45    1.09
   9  -9   4  122.97    1.62
  10 -11   3    0.13    0.80
  11  -4  -1   73.02    1.08
  13  -6  -3    2.33    0.73
  14  -8  -4   40.27    1.08
  14  -7  -5    5.16    0.74
   2  -7   8   31.38    0.69
   3  -8   8    4.33    0.75
   8  -3   2    0.06    0.59
   9  -8   4    1.40    1.02
  10 -12   3    0.30    0.85
  11 -10   2    7.13    0.87
  13  -5  -4   37.54    0.98
   4  -6   7   12.89    0.90
   7 -10   6   17.44    0.95
   7  -9   6    6.20    0.98
   7  -3   3   57.96    0.98
   8  -4   3   70.61    1.16
   9  -4   2    1.28    0.72
   9  -3   1   96.01    1.06
   3  -5   7  189.58    1.38
   7  -4   4    1.91    0.87
  11  -8   2   15.36    1.00
  11  -3  -2   32.85    0.73
  14 -11  -3   26.15    0.83
  14 -10  -3    9.37    0.77
  14  -9  -3   14.91    0.89
  14  -7  -4   94.88    1.32
   5  -7   7    8.39    0.96
   9  -7   4    2.64    1.06
   9  -5   3   74.53    1.30
  10 -13   3   21.66    0.78
  12 -10   1    9.58    0.83
  12  -5  -1    3.91    0.88
  13 -12  -1    2.45    0.62
  13  -8  -1  135.72    1.50
   4  -9   8    0.70    0.73
  10  -5   2    0.02    0.82
  10  -3   0   -0.22    0.56
  12  -4  -2  164.74    1.43
  13  -6  -2    3.21    0.79
  13  -5  -3  121.72    1.36
  14  -8  -3    1.71    0.80
  11 -13   2   19.09    0.75
  12 -12   1    0.60    0.67
  12  -8   1   20.04    0.99
  13  -7  -1   31.38    1.12
   9  -6   4    8.62    1.11
  11  -5   1    0.64    0.81
  11  -4   0    1.16    0.70
  15 -10  -5    1.69    0.62
   4  -5   7  346.45    2.06
   5  -6   7   66.52    1.31
   9 -10   5    9.89    1.00
   9  -9   5   53.09    1.50
  10 -11   4    0.24    0.91
  10 -10   4   23.38    1.02
  10  -9   4    0.55    0.94
  10  -6   3  129.47    1.61
  11  -3  -1   23.57    0.82
  12  -7   1    0.95    1.03
  13 -11   0   16.84    0.84
  13  -4  -4    0.72    0.72
  14 -11  -2    2.01    0.68
  14 -10  -2   20.73    0.85
  14  -9  -2   35.80    1.04
  14  -6  -4    1.93    0.76
  15  -9  -5   -0.17    0.68
   8 -10   6   49.23    1.29
  11 -11   3    0.52    0.86
  11  -9   3    4.30    0.90
  11  -6   2   10.75    0.96
  11  -2  -3    9.93    0.53
  12  -3  -3   13.04    0.70
   6 -13   7   21.02    0.77
   8 -11   6    0.64    0.77
   8  -4   4    6.01    0.97
   8  -3   3  169.45    1.49
   9  -4   3   89.77    1.31
   9  -3   2  358.49    1.96
  10 -12   4    2.13    0.76
  10  -8   4   54.63    1.32
  12  -5   0  194.21    1.74
  13  -6  -1    4.78    0.95
  13  -5  -2   77.23    1.16
  14  -8  -2   28.04    0.99
   8  -2   2   19.07    0.67
  10  -4   2   17.82    0.90
  11 -12   3    3.71    0.72
  11  -8   3   77.02    1.37
  12 -10   2   14.06    0.85
  12  -9   2    1.77    0.99
  12  -4  -1   39.03    0.94
  15 -10  -4    3.44    0.68
  15  -9  -4    7.80    0.76
   5 -12   8    0.13    0.75
   5  -8   8   -0.98    0.96
   7  -2   3  431.95    2.03
   9  -7   5   11.03    1.44
  10  -5   3   16.36    1.19
  12 -11   2    4.74    0.74
  12  -6   1    7.35    0.93
  14  -7  -2   40.48    1.13
  14  -6  -3    1.23    0.81
   2  -5   8  277.72    1.49
   9 -13   5   48.68    0.90
  11  -7   3   63.97    1.33
  11  -2  -2   40.25    0.72
  12 -12   2    6.85    0.73
  12  -8   2  120.11    1.51
  12  -3  -2    1.74    0.69
  14 -10  -1    5.24    0.72
  14  -9  -1   21.82    0.95
  14  -5  -4   21.73    0.92
  15  -8  -4   -0.02    0.73
   4  -6   8    4.45    0.88
  10  -2   0    3.16    0.53
  11  -5   2   13.09    0.96
  11  -3   0   49.68    0.94
   5  -7   8   42.06    1.15
  10  -1  -2   26.38    0.64
  12  -7   2    8.69    0.96
  13 -11   1    9.91    0.73
  13  -5  -1   77.15    1.22
  14  -8  -1    8.40    0.89
  15  -9  -3   12.58    0.83
  10 -10   5    4.35    1.04
  10  -6   4   33.69    1.27
  12  -4   0    6.08    0.93
  13  -8   1    6.13    0.87
  13  -6   0   18.34    0.96
  13  -4  -2   26.14    0.96
  14  -6  -2    1.68    0.92
   4 -10   9   -0.97    0.67
   6 -11   8   12.34    0.82
   7 -13   7    7.18    0.68
   7  -7   7    5.05    1.39
   8  -6   6    4.01    2.01
   9  -3   3  226.49    1.77
   9  -1   0  278.78    1.45
  10 -11   5   17.69    0.93
  10  -9   5    4.15    0.98
  11 -10   4    5.39    0.83
  11  -9   4   10.58    0.96
  11  -6   3   25.89    1.14
  14  -5  -3   27.80    0.95
  15  -8  -3    1.26    0.80
   6  -8   8  115.12    1.60
   8  -3   4    1.10    0.87
   9 -11   6   38.96    1.04
   9  -4   4    0.10    1.01
  10  -8   5   27.92    1.23
  10  -4   3   39.94    1.14
  10  -3   2    4.85    0.78
  11 -11   4    2.15    0.76
  11  -2  -1   56.62    0.88
  14  -7  -1  126.70    1.47
   4  -8   9    0.52    0.78
   5  -6   8   98.53    1.47
   6 -12   8   35.89    0.87
   8 -10   7   28.63    1.15
   8  -2   3    2.87    0.68
   9  -8   6   19.25    1.33
   9  -2   2   18.45    0.75
  11  -8   4    2.36    0.97
  12 -11   3    1.59    0.70
  12  -9   3   14.85    0.91
  12  -6   2   14.69    1.01
  12  -2  -3  202.11    1.41
   4  -5   8   43.22    0.98
   7  -3   5    8.12    1.01
  10  -1  -1   88.66    0.90
  12  -8   3    4.50    0.92
  13  -3  -3    0.03    0.74
  15  -9  -2    9.08    0.77
  10  -7   5    3.21    1.14
  11  -7   4   29.75    1.20
  11  -5   3   29.06    1.15
  13 -10   2    2.83    0.81
  13  -4  -1   31.59    0.95
  14  -6  -1   13.19    0.90
  14  -5  -2    6.84    0.92
   5  -9   9    1.19    0.91
   8 -12   7   11.48    0.71
   8  -5   6   -0.64    1.59
   8  -1   2  358.57    1.77
  12  -7   3   27.86    1.26
  12  -4   1    2.78    0.84
  15  -8  -2    3.78    0.75
   6  -3   6    2.74    1.05
   7 -11   8    1.61    0.85
   7  -1   3    4.67    0.61
   9  -1   1    8.52    0.56
  11  -2   0   95.92    1.12
  12  -2  -2  138.99    1.23
  14  -7   0   17.42    0.92
  14  -4  -3    0.23    0.82
   3  -4   8    2.56    0.55
   4  -3   7   11.81    0.72
   5  -5   8    4.18    0.92
   7  -8   8    8.69    1.31
  11  -6   4    6.15    1.09
  12  -3   0    3.77    0.74
  13  -3  -2  177.59    1.49
  15  -7  -2   17.37    0.96
  15  -6  -3   44.84    1.03
  10  -3   3  204.45    1.78
  11 -10   5   31.33    1.07
  11  -1  -2    6.16    0.53
  13  -7   2   77.81    1.31
   4  -6   9  201.62    1.66
   7 -12   8   13.75    0.70
   9  -4   5    4.68    1.26
   9  -2   3   65.93    1.12
  10  -4   4    4.05    1.07
  11 -11   5    4.65    0.80
  12 -10   4    5.38    0.83
  12  -6   3    3.68    0.98
  13  -5   1    9.33    1.08
  13  -4   0   62.26    1.28
  14  -6   0   53.13    1.27
  14  -5  -1    3.59    0.83
   4  -4   8  130.76    1.36
   9 -10   7   41.43    1.12
  11  -8   5    1.50    0.96
  12  -9   4   18.38    0.93
  12  -2  -1    1.93    0.74
  14  -4  -2   37.22    1.08
  15  -8  -1    1.93    0.75
   6 -10   9    2.25    0.80
   9 -11   7   30.43    0.92
  10  -5   5  235.79    2.32
  11  -2   1   36.67    1.03
  12  -8   4   34.93    1.10
  13  -6   2    3.93    1.09
  13  -3  -1    8.89    0.90
   8  -1   3   80.41    1.07
  10  -7   6    6.36    1.23
  11  -7   5   48.76    1.34
  11  -1  -1    0.55    0.53
  13 -10   3    0.81    0.68
  13  -9   3   10.87    0.86
  15  -5  -3   14.33    0.86
   5  -6   9    3.16    0.91
   5  -4   8   22.64    1.18
   8  -9   8   22.01    1.13
  10  -1   1   88.92    1.05
  12  -7   4    6.08    0.98
  12  -5   3   14.72    1.06
  13  -8   3   10.75    0.90
   4  -5   9    9.53    0.89
   6  -7   9   83.51    1.62
   7  -1   4  163.11    1.43
   8 -11   8    2.12    0.69
  14  -5   0   17.91    0.96
   3  -3   8  191.93    1.40
  10  -6   6    3.36    1.32
  10  -3   4   39.18    1.24
  12  -2   0  305.13    1.89
  13  -7   3    2.81    0.87
  13  -4   1  206.28    1.80
  14  -9   2   25.85    0.84
  14  -4  -1   26.43    0.96
  15  -8   0    1.71    0.73
  15  -6  -1   54.17    1.17
   9  -2   4   22.47    1.03
  10  -4   5    2.66    1.20
  10  -2   3  201.00    1.73
  11  -3   3    6.08    0.95
  12  -6   4   29.96    1.17
  13  -3   0   46.08    1.07
  13  -2  -2   65.71    1.05
  14  -8   2   30.77    0.97
  15  -5  -2   13.34    0.88
  16  -7  -3   13.55    0.75
   4  -7  10    4.73    0.90
   4  -2   7   51.94    0.95
   7  -9   9    3.89    0.93
  11 -10   6    0.93    0.81
  11  -9   6   28.03    1.15
  12  -1  -2   41.76    0.84
  14  -3  -2   16.65    0.95
  15  -7   0   18.95    0.94
   3  -6  10    0.18    0.75
   3  -4   9    3.57    0.66
   4  -3   8   19.12    0.78
   5  -5   9   -0.34    0.89
   6  -6   9   15.77    1.19
   6  -4   8   21.86    1.35
   7 -11   9    0.62    0.70
   7  -8   9    8.07    1.05
   9  -1   3   20.28    0.83
   9   0   1  137.89    1.14
  10 -10   7   16.55    0.88
  11  -8   6    0.32    0.93
  12 -10   5    1.43    0.71
  12  -9   5   12.01    0.89
  12  -4   3    0.20    0.96
  13  -6   3   42.92    1.16
   5  -8  10    3.00    0.86
   8  -1   4  239.58    1.77
  10  -8   7    1.76    1.05
  10  -5   6    1.50    1.36
  12  -8   5   21.16    0.99
  13  -9   4    5.01    0.80
  14  -5   1   59.30    1.30
  14  -4   0   33.83    1.15
  16  -7  -2   11.37    0.81
   7  -7   9   10.33    1.19
   9 -10   8    0.40    0.74
   9  -9   8   19.42    1.07
  10   0   0    3.01    0.58
  11  -7   6   29.42    1.21
  12  -5   4   40.77    1.27
  12  -2   1   10.35    0.83
  12  -1  -1   41.85    0.91
  13  -8   4    3.28    0.82
  13  -2  -1   33.04    0.91
  15  -6   0   -0.14    0.86
  15  -5  -1    1.48    0.83
   4  -4   9   34.87    0.96
   5  -3   8  234.21    1.96
   9  -8   8   16.87    1.14
  11  -1   1   10.51    0.74
  13  -3   1   41.88    1.08
  14  -3  -1    1.59    0.93
  15  -8   1   23.50    0.84
  15  -4  -2    0.36    0.88
   6  -5   9   15.80    1.36
  10  -2   4   43.26    1.35
  13  -7   4    8.10    0.91
  13  -5   3   57.05    1.27
   3  -5  10    1.83    0.80
   8 -10   9    0.52    0.82
   8  -9   9    6.58    0.96
   9  -3   6  461.05    3.19
   9  -2   5  131.83    1.73
  11  -3   4   58.56    1.36
  11  -2   3   31.44    1.08
  14  -8   3   10.83    0.78
  15  -7   1    0.32    0.76
   5  -4   9   44.23    1.19
   8  -8   9    4.74    1.16
  10  -4   6   15.03    1.44
  11  -4   5   40.15    1.39
  11   0  -1   40.83    0.76
  12  -1   0   28.48    0.95
  13  -2   0   89.74    1.25
  14  -4   1    7.64    1.05
  16  -7  -1    2.43    0.72
   6  -7  10    1.12    1.09
   9  -1   4   94.63    1.35
  10  -1   3  170.38    1.59
  12  -2   2   16.36    0.94
  13  -6   4   10.19    0.95
  14  -7   3    5.48    0.85
  14  -5   2    1.91    0.87
  15  -5   0   60.93    1.18
  15  -4  -1   19.84    1.04
   3  -3   9  101.90    1.16
   3  -2   8   49.67    0.83
   4  -5  10   29.81    0.94
   8  -7   9   48.14    1.46
   8  -1   5   72.07    1.31
  11  -9   7    5.61    0.92
  11  -1   2    4.31    0.81
  12  -9   6   -0.36    0.80
  14  -3   0   52.74    1.13
  14  -2  -2   24.06    0.96
  15  -6   1    1.44    0.82
   4  -2   8  410.94    2.15
  10  -5   7   21.85    1.88
  11  -8   7   44.06    1.22
  11  -5   6    7.30    1.25
  12  -8   6   25.38    1.01
  13  -3   2    8.67    0.94
   6  -6  10   21.08    1.28
   6  -4   9   18.73    1.26
   7 -10  10    1.64    0.76
  10  -9   8    1.57    0.84
  13  -8   5    1.14    0.73
  14  -6   3   -1.11    0.88
   5  -5  10    6.76    0.92
   9   0   3  318.88    1.91
  10  -2   5    7.17    1.13
  12  -7   6    1.51    0.92
  12  -1   1    4.37    0.78
  12   0  -2   21.44    0.78
  13  -5   4   20.78    1.06
  13  -2   1   44.36    1.10
  13  -1  -1    4.08    0.83
  15  -7   2   37.38    0.92
   3  -4  10   14.10    0.73
   8   0   4 1078.42    3.41
   9  -9   9   10.57    0.91
   9  -2   6    8.27    1.29
  10  -3   6    6.78    1.34
  11  -3   5    2.29    1.18
  11  -2   4   15.65    1.08
  12  -3   4    8.20    1.22
  13  -7   5   10.05    0.91
  14  -4   2   20.63    0.99
  15  -5   1    3.55    0.88
  15  -4   0   18.40    0.96
   4  -4  10   15.45    0.98
   5  -3   9    5.77    0.97
   9  -8   9    5.56    1.03
   9  -1   5    1.32    0.99
  10  -1   4   16.21    1.01
  10   1  -1   93.52    0.97
  11   0   1  109.17    1.29
  12  -6   6   30.83    1.14
  14  -3   1   52.29    1.17
  16  -5  -1   39.13    1.03
   4  -6  11   -0.46    0.89
   9   1   1    8.43    0.57
  12  -4   5   14.94    1.15
  13  -6   5   11.70    1.04
  14  -7   4    3.53    0.74
  15  -6   2    0.75    0.77
  16  -6   0    3.84    0.76
   5  -7  11    0.07    0.84
   7  -6  10   13.10    1.38
   8  -1   6    5.28    1.09
   9  -7   9   47.85    1.44
  13  -4   4   39.09    1.18
  13  -1   0   13.27    0.81
  14  -2   0   36.61    1.10
   5  -4  10    1.71    0.92
   6  -3   9   11.26    1.24
   8  -9  10    8.69    0.89
   9  -4   8    1.01    1.85
  10   1   0   21.76    0.64
  12  -1   2    5.97    0.86
  13  -2   2   23.24    1.00
   3  -2   9  138.70    1.28
   8  -8  10    0.43    0.91
  11  -5   7    8.93    1.24
  12  -5   6    8.36    1.05
  12   0   0    4.00    0.67
  14  -6   4   32.12    0.99
  15  -4   1   20.75    0.97
   2  -2   9  493.79    1.97
   3  -1   8  509.22    2.11
   4  -2   9  153.56    1.45
   5  -6  11   14.79    0.99
   8  -7  10    7.99    1.20
   8   1   3   77.52    1.01
   9   1   2  103.83    1.10
  10  -2   6   63.06    1.57
  11  -2   5    2.37    1.08
  12  -8   7    0.09    0.75
  13  -5   5    0.10    0.87
  14  -3   2   10.59    0.91
  16  -5   0   14.96    0.87
   2  -3  10   28.26    0.78
   3  -3  10    5.93    0.64
   4  -1   8   29.54    0.85
   6  -7  11   38.16    1.13
   6  -4  10   14.51    1.37
   7  -5  10   68.53    1.64
   7   1   4  152.15    1.31
  10  -1   5   74.69    1.44
  10   1   1   95.76    1.06
  11  -3   6   61.42    1.55
  11  -1   4   18.43    1.06
  12  -3   5    6.69    1.08
  12  -2   4    1.79    0.98
  13  -1   1   30.20    0.98
   5  -2   9   15.39    1.00
   9  -1   6   34.78    1.32
  10  -8   9    0.01    0.91
  13  -7   6   11.68    0.82
  14  -5   4   31.38    1.06
  14  -2   1   63.10    1.19
   5  -5  11    6.80    1.06
   8  -6  10    2.12    1.24
   9  -3   8    2.47    1.70
  11  -4   7   18.39    1.35
  12  -4   6    8.64    1.09
  13  -3   4   58.25    1.29
  13  -2   3   17.96    1.01
   5  -3  10   15.22    1.02
   7  -8  11    2.46    0.88
   9   0   5   40.10    1.15
  10   0   4    4.92    0.89
  11   1   0   43.48    0.83
  12  -6   7    5.32    0.95
  13  -6   6    0.68    0.79
  13  -4   5   39.14    1.16
  13   0  -1  253.69    1.75
  15  -4   2    5.51    0.86
  15  -2  -1    3.14    0.79
   3  -4  11    5.40    0.75
   6   1   5    4.33    0.66
   8   1   4  215.79    1.60
  10   1   2   16.30    0.75
  13  -1   2    7.27    1.03
  14  -3   3   21.11    1.12
  16  -5   1    5.21    0.76
   4  -4  11   36.71    1.12
   7  -7  11    1.59    0.94
   7  -4  10    3.69    1.26
   8  -5  10    5.22    1.38
   8   0   6   40.10    1.21
   9  -8  10    2.27    0.79
  14  -6   5   29.91    0.92
  14  -1   0    0.80    0.82
  15  -5   3   14.37    0.83
   6  -3  10   92.12    1.62
   9  -7  10   10.63    1.06
  11  -5   8   31.45    1.34
  11  -2   6    6.72    1.18
  11  -1   5    2.45    1.03
  11   1   1   10.45    0.72
  12  -5   7   23.32    1.12
  12  -2   5    9.02    1.06
  12   0   2   24.98    0.93
  13  -5   6    1.38    0.94
  10  -2   7    3.20    1.32
  10  -1   6   62.33    1.49
  12  -3   6    7.42    1.09
  12   1  -1   40.97    0.93
   3  -2  10    7.60    0.67
   3  -1   9   60.39    0.92
   4  -1   9  371.38    2.11
   5   1   6  755.86    2.78
   8   2   2   19.97    0.62
   9  -6  10   50.91    1.58
   9   1   4   88.66    1.23
  13  -3   5    0.40    0.91
  14  -5   5    8.67    0.81
   2  -2  10  188.57    1.38
   4  -2  10   88.61    1.26
   7   2   3  386.96    1.81
   8  -8  11   23.54    0.94
   8   1   5   67.49    1.17
   9   2   1    4.95    0.53
  11   1   2    3.64    0.85
  12   1   0   28.73    0.90
  13  -1   3    6.15    1.05
  14  -1   1   54.60    1.14
  15  -4   3   34.75    1.01
  15  -3   2   16.15    0.94
  16  -4   1   25.52    0.88
   3  -3  11    6.84    0.81
   5  -2  10  124.06    1.58
   6  -4  11   53.21    1.50
   6   1   6   79.91    1.18
   7  -5  11    3.77    1.25
   7  -3  10   70.16    1.74
   8  -7  11   30.71    1.14
  10   2  -1   21.08    0.61
  11  -4   8    2.05    1.21
  13  -4   6    1.80    1.00
  15  -2   1    5.57    0.90
   2  -3  11   13.76    0.76
   8  -1   8    3.32    1.40
   9  -3   9    3.48    1.92
  10   2   0    3.93    0.51
  12  -6   8    4.23    0.90
  14  -2   3   16.02    0.93
   6  -7  12   -1.72    0.80
   7   1   6    7.13    0.86
   9   2   2   18.11    0.66
  12   1   1    3.54    0.81
   5  -3  11    1.06    0.90
   6  -2  10   32.81    1.35
   7   2   4   98.10    1.10
   9   1   5    0.68    0.86
  10  -7  10    1.71    0.85
  10  -1   7  128.94    1.92
  10   1   4   14.82    0.94
  10   2   1   17.14    0.68
  11  -2   7   45.50    1.47
  11  -1   6   52.79    1.41
  12  -2   6   20.06    1.15
  12  -1   5    4.58    1.01
  14  -1   2   23.76    0.97
   7  -4  11  173.03    2.20
  11   0   5  222.22    1.99
  11   1   3   33.72    1.02
  12  -5   8    2.97    0.91
  12  -3   7    4.52    1.21
  13  -5   7    2.48    0.86
  13  -2   5   15.14    1.01
  14   0   0   12.52    0.91
  15  -3   3   -0.04    0.80
  15  -1   0   19.68    0.99
  16  -4   2   29.31    0.88
  16  -3   1    3.05    0.79
   4   1   7  189.81    1.49
   7  -1   9   12.71    1.51
   8  -5  11   99.68    1.84
   8   1   6    5.64    0.96
   9  -1   8  294.68    2.76
  10  -6  10    5.38    1.09
  10   0   6    5.09    1.11
  11  -3   8   13.83    1.30
  11   2  -1   58.72    0.86
  15  -4   4    7.53    0.81
  15  -2   2    6.74    0.84
   6  -3  11  208.13    2.10
   6   1   7    6.87    0.91
   8   2   4   22.68    0.81
   9   0   7   87.17    1.66
  10   2   2   52.31    0.94
  11   2   0   97.49    1.08
  14  -2   4   31.77    1.15
   3  -1  10  258.84    1.72
   4  -1  10   65.57    1.17
   6  -5  12    1.21    0.95
   9  -7  11    3.95    0.80
  13   1   0   12.11    0.82
  14  -3   5   21.74    1.01
  16  -2   0    1.72    0.84
   3  -2  11   75.98    1.11
   5  -4  12   10.52    1.01
   5  -1  10  444.70    2.65
   7  -6  12    7.21    0.96
   9  -6  11   47.01    1.31
  10   1   5   68.16    1.32
  11   2   1   34.78    0.86
  12  -4   8   42.87    1.28
  13  -4   7   16.44    0.97
  13   0   3   29.07    1.03
  14  -1   3   21.44    0.97
  15  -1   1   13.91    0.90
   3   0   9  119.70    1.20
   5  -2  11    3.14    1.14
   9   1   6   30.76    1.18
   9   2   4   20.88    0.89
  10   2   3  181.76    1.56
  11  -4   9  113.77    1.91
  11  -1   7    5.89    1.18
  12  -1   6    1.56    1.01
  13   1   1   30.26    1.03
  14  -4   6    2.05    0.81
  16  -3   2    2.73    0.76
   8   2   5   49.13    1.07
  10  -1   8   28.33    1.72
  11  -2   8   15.49    1.31
  12  -2   7    6.55    1.05
  13  -2   6    1.23    1.04
  15  -3   4   32.13    0.96
  15  -2   3   18.63    0.94
   4  -3  12    1.77    0.99
   4   1   8   28.96    0.89
   5   2   6  434.54    2.16
   6   2   6   53.08    1.03
   8   1   7   39.53    1.31
   9  -5  11    4.46    1.23
  11   2   2   37.36    0.95
  16  -2   1    4.10    0.74
   6  -2  11  128.84    1.81
  12  -3   8   40.51    1.29
  12   2   0  314.12    1.85
  13  -3   7   23.30    1.09
  15  -1   2   44.68    1.08
   5  -3  12  360.81    2.45
   7   2   6   58.69    1.17
   8   3   2    0.93    0.51
   9  -1   9   13.62    1.60
   9   2   5  111.15    1.54
   9   3   0   69.43    0.83
   9   3   1   97.88    1.06
  10   1   6   58.25    1.38
  11   1   5    2.35    0.98
  13   1   2    7.45    0.85
  14  -1   4    6.20    0.88
   8  -3  11    3.22    1.35
  11   2   3   30.98    0.98
  12   1   4  142.91    1.62
  12   2   1    9.55    0.75
  14  -3   6    6.84    0.82
  14   1   0    0.54    0.85
   7  -4  12    1.09    1.07
   7  -2  11    2.80    1.26
   9   1   7   40.84    1.37
   9   3   2  359.62    1.87
  16  -2   2    2.67    0.76
   4  -1  11    9.58    0.90
   4   0  10  793.29    3.16
   5  -1  11   22.43    1.25
   5   2   7   46.45    1.06
   6  -3  12    3.05    1.04
   6   3   4   74.84    0.96
  10   3  -1   26.24    0.68
  10   3   0    0.24    0.51
  11  -1   8   42.39    1.61
  11   0   7  285.82    2.50
  12  -4   9    1.28    0.97
  12  -1   7   49.02    1.31
  12   0   6   66.72    1.53
  13   1   3    5.78    1.04
  15  -2   4   38.88    0.99
  15   0   1    4.30    0.88
   4   2   7   52.93    0.97
   7   3   4   12.22    0.70
   9   3   3  206.02    1.62
  10   2   5    5.88    1.11
  10   3   1  138.09    1.25
  12  -2   8   35.15    1.23
  13  -2   7    7.18    1.01
  13  -1   6    2.72    0.89
  14   1   1   55.66    1.14
  15  -1   3    0.74    0.81
   2  -1  11  166.34    1.39
   3  -2  12    9.37    0.86
   4  -2  12   28.63    1.01
   5   1   9    2.87    0.98
   6  -1  11   25.15    1.46
   7   2   7   38.27    1.20
   8   3   4    1.32    0.70
  10  -5  11   23.50    1.16
  10  -1   9   29.95    1.58
  10   0   8  101.99    1.84
  10   3   2    5.68    0.81
  11  -4  10   14.95    1.27
  11  -2   9   -0.26    1.17
  11   1   6   50.67    1.47
  11   2   4   15.38    0.97
  13   2   0   88.69    1.25
   3   1   9   59.02    1.04
   5  -4  13    0.62    0.93
   5  -2  12    0.05    0.92
   6   3   5   31.34    0.92
   8  -4  12   30.98    1.35
   8  -2  11    1.24    1.43
   9  -3  11    7.28    1.61
  10   1   7  117.83    1.76
  14  -2   6    1.52    0.80
   7   3   5    8.40    0.77
   9   0   9   29.55    1.60
  10  -2  10   95.01    2.13
  11   3   0   52.77    0.93
  12  -3   9   17.81    1.12
  12   2   3    2.48    0.84
  13  -3   8   60.31    1.22
  13   2   1   43.53    1.13
   1  -1  11   20.08    0.74
   6  -2  12  228.21    2.15
   7   1   9   11.57    1.41
   9  -1  10    8.61    1.74
   9   1   8  245.59    2.39
  11   3   1   77.63    1.08
  13   1   4   61.58    1.23
   2   1   9    5.09    0.64
   8   3   5   73.21    1.20
  10   2   6   53.55    1.32
  11  -3  10   11.90    1.32
  11   3   2    4.93    0.85
  15  -2   5   30.00    0.91
  15  -1   4   31.77    0.97
  16  -1   2   16.55    0.84
   4   2   8  412.91    2.25
   6   3   6    2.70    0.75
   8  -3  12    0.83    1.30
  12  -1   8    2.89    0.97
  12   2   4    1.19    1.03
  13  -1   7   10.92    1.03
  13   2   2   23.10    0.92
   3   0  11  114.23    1.41
   5  -3  13    4.48    0.96
   5   0  11   32.64    1.20
   5   3   6   78.35    1.10
   7  -2  12   39.63    1.41
   7   2   8  100.36    1.67
   7   3   6  164.67    1.62
   9   3   5    9.32    0.92
  11  -1   9    2.07    1.14
  12   1   6   -0.38    1.12
  14   1   3   21.40    0.98
  15   0   3   19.61    0.96
   3  -1  12    6.40    0.82
   4   1  10   66.26    1.23
   5  -1  12    8.21    1.19
   9  -4  12    3.23    1.06
  10   1   8   25.07    1.35
  11   3   3    6.34    0.82
  12   3   0    4.23    0.70
  13  -2   8   28.58    1.03
   3   1  10  261.76    1.79
   4   3   6   11.88    0.72
   6  -3  13    0.57    1.06
   6   1  10   83.18    1.73
   8   2   8   40.20    1.42
  12   3   1    8.74    0.78
  13   1   5    3.07    0.90
  13   2   3   16.64    0.94
  15   1   1   13.28    0.85
   2  -1  12    1.92    0.73
   6  -1  12   48.44    1.40
   8   4   1  178.07    1.27
   8   4   2  137.02    1.25
   9   1   9   14.09    1.41
  11  -2  10    1.40    1.21
  11   2   6    6.63    1.04
  14   2   1   61.42    1.22
  16  -1   3   17.70    0.77
   4  -2  13    1.80    0.88
   5   2   9   14.67    1.08
   5   3   7   46.49    1.07
   6   3   7    3.55    0.89
   7   3   7  114.85    1.56
   9  -3  12   10.75    1.37
   9   3   6  333.77    2.32
   9   4   1   83.46    1.02
  10   2   7    2.53    1.09
  11   3   4   54.75    1.19
  12   3   2    0.27    0.74
  14   1   4    5.87    0.96
  15  -1   5    0.62    0.69
   2   1  10   32.11    0.80
   7  -3  13   -0.14    1.05
   8   4   3   61.48    0.98
   9   2   8   31.83    1.37
   9   4   0  114.95    1.08
   9   4   2    2.06    0.62
  12   0   8    1.83    1.09
  15   1   2   44.50    1.05
   7  -1  12   22.64    1.31
   7   4   4    1.54    0.65
   8  -4  13    8.89    0.96
  10   4   1    0.96    0.67
  11   0   9   37.13    1.34
  11   1   8   36.55    1.47
  12   1   7   48.55    1.26
  12   3   3    1.95    0.84
  13  -1   8   11.76    0.97
  13   0   7   50.15    1.21
  13   2   4   39.17    1.10
  14   2   2   60.61    1.18
  16   0   2    8.89    0.81
   1   0  11  620.25    2.39
   6  -2  13    8.61    1.05
   8   1  10    4.81    1.53
  10   4   0   14.84    0.66
  10   4   2   18.52    0.89
   4   0  12    5.68    0.92
   5   1  11   19.32    1.17
   6   3   8   -0.47    1.01
   6   4   5   19.70    0.79
   7   4   5  115.63    1.33
  10   0  10    3.20    1.30
  10   1   9   27.53    1.40
  10   3   6    7.52    1.02
  11  -1  10   14.12    1.29
  11   2   7   40.33    1.43
  14  -1   7    0.45    0.68
  15   1   3    0.71    0.84
   5   3   8  219.02    1.99
   7   3   8    9.71    1.15
   8  -1  12   60.23    1.82
   8   4   5   12.14    0.89
   9  -2  12   20.70    1.51
  10   2   8    7.51    1.18
  12   3   4    7.40    1.04
  14   1   5    3.48    0.90
   1   1  10  235.71    1.48
   2   2   9  499.49    2.17
   4  -1  13    6.92    0.97
   4   3   8   18.88    0.91
   6   0  12   86.17    1.62
   6   2  10   35.17    1.48
   7  -2  13    8.70    1.10
   8  -3  13   36.98    1.18
   9   1  10    7.25    1.43
  11   4   0    0.23    0.71
  11   4   1    6.75    0.72
  13   2   5   12.72    0.93
  15   0   5   70.00    1.14
   5  -1  13   85.58    1.48
   6   4   6  130.43    1.44
   7   4   6   83.32    1.31
   8   3   8    4.16    1.15
   9   2   9   48.74    1.56
  10   4   4    3.99    0.86
  11   4   2    0.03    0.72
   2  -1  13    2.07    0.91
   2   1  11  168.63    1.47
   3   2  10    7.89    0.78
   6  -1  13   34.09    1.35
   7   2  10    2.47    1.46
  11   3   6   50.66    1.29
  11   4   3   30.09    1.09
  12   1   8    3.27    1.08
  13   3   3    4.72    0.88
   6  -3  14   14.36    1.01
   8   4   6  327.57    2.25
  10   3   7   82.87    1.52
  11   1   9    1.43    1.03
  14   2   4   30.30    1.01
   5   3   9    5.21    1.07
   6   3   9    8.15    1.26
   8  -2  13    9.16    1.11
   8   1  11    3.73    1.57
   8   2  10  131.87    2.33
   9   3   8    1.14    1.14
  12   2   7    5.57    0.94
  12   4   1    1.59    0.86
  14   3   1   50.82    1.17
   2   2  10  205.73    1.61
   5  -2  14   46.83    1.20
   6   4   7    5.15    0.94
   7  -1  13    7.24    1.15
   7   3   9    1.09    1.24
   7   4   7  242.34    2.07
  10   2   9   19.32    1.46
  11   4   4   14.40    0.94
  12   4   2    4.48    0.88
  13   3   4   58.79    1.30
   4   1  12   41.37    1.20
   5   1  12    7.51    1.06
   5   4   7   94.67    1.36
   7  -3  14   30.74    1.06
   1   1  11   20.61    0.72
   3   1  12    5.22    0.86
   4   2  11  109.11    1.54
   5   0  13    9.98    1.04
   6  -2  14   19.75    1.09
   6   1  12   49.44    1.48
   8   3   9   15.42    1.35
  11   3   7    0.15    0.99
  12   4   3    0.55    0.81
  15   2   3   18.40    0.91
   3   2  11   81.20    1.36
   4   4   7   10.96    0.84
   7   5   3   30.19    0.79
   8   5   2  233.02    1.55
   8   5   3  201.88    1.55
   9   1  11   21.56    1.59
  10   3   8    2.94    1.10
   2   1  12    2.42    0.84
   5   3  10   16.31    1.22
   5   4   8   22.19    1.12
   6   4   8   17.26    1.16
   7   1  12   22.39    1.44
   7   2  11    2.56    1.44
   7   4   8    2.21    1.10
   7   5   2   48.54    0.82
   8  -1  13   14.38    1.23
   9   4   7   21.19    1.17
   9   5   1    2.24    0.56
   9   5   2  185.14    1.49
   9   5   3   69.24    1.11
  13   1   8   12.80    0.91
  13   3   5    0.11    0.85
  13   4   1  204.26    1.74
  14   3   3   20.20    0.94
   4  -1  14   17.71    1.00
   5  -1  14    3.74    1.03
   6   5   4  160.12    1.40
   7  -2  14    1.70    0.96
   7   3  10   68.73    2.00
   9   3   9    2.14    1.21
   9   5   4   85.41    1.38
  10   5   1  124.96    1.30
  10   5   2   -0.01    0.83
  11   1  10   12.39    1.11
  11   2   9    0.00    1.14
  12   2   8   33.54    1.15
  12   4   4   13.18    0.95
   1   2  10   14.98    0.66
   2   2  11   64.84    1.17
   2   3   9   48.16    0.91
   4   4   8  137.06    1.57
   7   0  13   19.86    1.30
   7   5   5   16.04    0.89
   8   4   8    6.26    1.16
   9   5   0  217.34    1.42
  13   4   2    4.65    0.86
  15   2   4   38.86    1.00
   3   3  10    5.84    0.85
  10   1  11   28.95    1.53
  10   4   7    5.32    1.04
  10   5   0  132.67    1.25
  11   0  11   39.42    1.32
  12   3   7    3.94    1.06
  14   2   6    0.88    0.81
  14   3   4    1.18    0.85
   0   1  11  433.44    1.99
   5   2  12    0.35    1.26
   6   4   9   19.73    1.31
   6   5   6   20.59    0.96
   7   5   6    9.02    0.95
   8   3  10    3.14    1.35
   9   4   8    1.24    1.15
  10   5   4    7.99    0.89
  11   5   1    0.56    0.82
  12   4   5   14.64    0.96
  13   4   3   55.41    1.17
   1   1  12   47.45    0.97
   3   4   8    2.26    0.74
   4   1  13    8.36    0.99
   4   2  12   29.15    1.15
   5   1  13   92.84    1.55
   5   4   9   46.50    1.40
   7   4   9   11.01    1.27
   8   5   6    0.12    0.93
  11   5   3   26.83    1.10
  13   3   6    1.36    0.86
   3   2  12    9.69    0.94
   4   4   9   38.10    1.19
   6   1  13   35.79    1.30
   7  -1  14   24.50    1.14
   9   2  11   38.98    1.57
   9   5   6   38.35    1.34
  10   5   5  206.91    1.87
  13   4   4   37.75    1.14
   1   2  11  336.01    1.94
   2   3  10   31.53    0.88
   4   3  11   39.15    1.23
   6   5   7  117.59    1.57
   7   5   7   74.15    1.42
   9   3  10   95.23    1.78
  11   5   4   13.46    0.96
   1   3   9    5.75    0.59
   2   1  13    1.67    0.96
   7   1  13    7.63    1.24
   7   3  11    3.63    1.45
   8   5   7    6.68    1.06
  11   2  10    0.28    0.96
  12   5   1  160.40    1.55
  12   5   2    0.78    0.89
  15   3   3    1.04    0.78
   3   3  11    9.62    0.93
   4   5   6   10.04    0.77
   5   4  10    1.42    1.33
   6   0  14    2.52    0.98
  11   1  11    4.53    0.97
  11   3   9    7.53    0.98
  12   3   8   37.12    1.14
   2   4   8  245.61    1.66
   6   5   8  188.85    1.99
   7   4  10    4.29    1.34
   8   2  12   12.31    1.47
   8   3  11    5.47    1.41
   9   0  13    5.01    1.21
  10   2  11   17.27    1.34
  11   5   5    6.83    0.92
  13   4   5   36.48    1.07
  14   4   3    1.26    0.82
   0   1  12   73.52    1.08
   4   4  10   16.51    1.12
   4   5   7  362.25    2.25
   7   5   8    1.84    1.11
  10   3  10    9.74    1.10
  12   5   4   39.44    1.20
  15   3   4   32.26    0.91
   1   3  10   63.97    1.04
   2   3  11   14.56    0.87
   4   2  13    0.06    0.97
   5   2  13    8.97    1.10
   5   3  12  398.19    2.89
   8   4  10  170.97    2.17
   8   5   8    6.66    1.14
   8   6   3   56.02    1.11
  10   1  12    6.94    1.25
  11   4   8    1.58    0.92
  14   3   6    5.54    0.74
   1   2  12    5.95    0.82
   3   2  13   57.90    1.36
   4   1  14   18.23    1.18
   4   3  12    2.86    1.03
   5   1  14    3.75    1.10
   6   2  13   10.27    1.14
   7   6   3  405.01    2.07
   8   6   4  108.88    1.37
   9   3  11    7.55    1.44
   9   6   4    8.91    1.02
  11   5   6    7.33    0.95
  13   5   2   39.16    1.08
  14   4   4   63.76    1.20
   0   2  11   13.24    0.71
   3   1  14   16.40    1.12
   6   5   9   14.84    1.29
   7   6   2    1.86    0.64
   7   6   5  163.11    1.62
  10   6   3  127.17    1.53
  12   5   5   73.29    1.28
   3   3  12   12.31    0.98
   5   4  11  380.24    2.82
   5   5   9   -0.33    1.16
   6   1  14    1.67    1.01
   6   6   3  236.90    1.57
   6   6   5  175.56    1.61
   7   2  13    9.00    1.26
   7   3  12   60.02    1.74
   7   5   9   44.03    1.45
   7   6   6   38.28    1.16
   8   6   1   73.63    0.99
   9   4  10    1.84    1.13
   9   6   1    2.20    0.60
   9   6   5  166.67    1.71
  10   6   1   84.71    1.19
  10   6   4   32.52    1.18
  13   5   3   53.74    1.14
   2   2  13  185.17    1.72
   7   4  11  193.45    2.46
   9   1  13   47.87    1.57
   1   3  11  312.96    1.93
   2   4  10   17.13    0.88
   5   0  15   27.42    1.04
   5   6   5   27.26    0.90
   6   6   2  290.02    1.63
   7   1  14   22.81    1.19
   7   6   1  505.20    2.05
   8   3  12    0.40    1.34
  10   6   5   14.48    0.98
  11   6   2    9.82    0.85
  14   4   5    2.99    0.71
   2   3  12   75.22    1.27
   3   4  11    5.34    0.98
   5   6   4    9.22    0.69
   5   6   6   57.95    1.17
   6   6   7  281.73    2.20
   8   4  11   33.18    1.48
   8   6   7    5.62    1.22
  10   3  11    2.22    1.02
  10   6   0   53.55    0.97
   5   3  13    6.22    1.26
   5   5  10    7.67    1.27
   6   5  10    7.11    1.35
   7   5  10   66.22    1.84
   8   6   0  323.73    1.63
   9   5   9    2.00    1.07
   0   2  12    6.98    0.70
   0   3  10   21.11    0.67
   1   2  13   31.72    1.09
   3   5   9   91.22    1.39
   4   2  14    4.36    0.99
   5   2  14   47.27    1.38
   5   6   7   60.21    1.29
   6   3  13    1.37    1.30
  11   6   5   30.53    1.20
  12   6   2   13.51    0.96
  13   5   5    0.49    0.80
   3   2  14   10.45    1.10
   3   3  13   25.84    1.26
   4   5  10   33.55    1.30
   4   6   5   99.99    1.21
   4   6   6  259.38    1.89
   6   2  14   20.96    1.22
   6   6   8    7.26    1.13
   8   5  10    2.90    1.18
   9   3  12   13.16    1.33
   9   4  11   21.01    1.37
  12   6   3    3.91    0.97
  14   4   6    1.36    0.64
  14   5   3   90.62    1.28
   1   3  12  112.37    1.43
   2   4  11   33.49    1.04
   4   1  15    1.86    0.97
   4   4  12  183.81    1.98
   4   6   7   11.03    0.95
   5   6   8   95.78    1.60
  12   5   7   19.93    0.97
  12   6   4   28.58    1.12
  -1   2  11   11.92    0.64
   1   4  10   11.41    0.72
  11   6   6    8.35    0.92
  12   4   9    0.45    0.79
  13   5   6    1.13    0.80
   0   3  11  327.98    1.85
   2   2  14   32.38    1.10
   2   3  13  353.65    2.31
   2   5   9   19.60    0.90
   4   6   8    3.45    1.05
   5   5  11    8.06    1.28
   6   5  11  139.24    2.13
   6   6   9   14.59    1.27
   7   2  14    1.96    0.99
   9   6   8    1.19    1.00
   4   5  11  146.32    1.90
   5   6   9    5.30    1.22
   6   1  15   12.37    0.91
   7   5  11    3.15    1.31
   8   4  12   34.85    1.56
   8   7   3    8.43    0.92
   8   7   4    5.64    0.85
  10   4  11    3.43    1.02
  12   6   5    1.77    0.85
   0   2  13    5.09    0.88
   7   7   3   32.10    0.95
   7   7   4   20.26    0.92
   9   7   3    6.30    0.81
   9   7   4    2.86    0.84
   9   7   5   10.03    1.10
   1   4  11  251.19    1.83
   2   4  12  141.27    1.62
   3   6   7  107.94    1.43
   4   6   9  247.54    2.27
   5   3  14   94.38    1.62
   5   4  13    0.53    1.27
   6   7   5  211.21    1.79
   9   7   2    1.71    0.68
  10   6   8    8.52    0.96
  10   7   2   29.08    1.01
  10   7   3   68.78    1.18
  10   7   4   33.05    1.06
  14   5   5    8.56    0.72
   0   4   9   96.53    1.05
   1   2  14   13.49    0.92
   1   3  13   15.22    1.04
   3   3  14    7.86    1.13
   6   3  14   17.60    1.23
   6   6  10   19.12    1.40
   9   4  12    3.18    1.16
  10   7   5    3.18    1.03
  13   5   7    1.85    0.70
  13   6   4    9.95    0.85
   0   3  12   75.17    1.10
   4   2  15   27.20    1.07
   5   6  10   10.06    1.37
   6   7   3    2.17    0.62
   6   7   7   11.92    1.09
   7   6  10   12.89    1.28
   7   7   2   20.02    0.73
  10   7   1    3.65    0.79
  11   7   3   60.26    1.26
   0   4  10   38.80    0.84
   3   2  15   44.09    1.15
   3   6   9  192.96    1.91
   4   6  10  164.62    2.01
   5   7   5    1.15    0.78
   5   7   6  254.10    2.00
   6   5  12    1.20    1.26
   7   3  14   36.04    1.30
   8   6  10    3.47    1.10
   8   7   1  761.45    2.65
   9   5  11    3.82    1.04
  10   7   6    7.63    1.08
  11   7   2   92.05    1.28
  11   7   4   27.42    1.04
   1   4  12   92.55    1.40
   2   3  14    4.61    1.07
   2   5  11   75.30    1.34
   6   2  15   24.18    0.99
   6   7   8    2.23    1.10
   7   5  12   66.03    1.73
  11   7   5   44.88    1.23
  12   6   7    5.07    0.85
   2   4  13   18.41    1.17
   3   5  12   86.88    1.52
   6   7   2    3.32    0.56
   7   7   1  241.31    1.52
   8   4  13    8.66    1.35
   8   7   8   19.47    1.16
  11   5  10   15.04    0.93
   0   4  11   49.13    1.04
   1   5  10    7.64    0.79
   2   6   8    6.22    0.84
   3   6  10    0.82    1.04
   4   7   6   17.39    0.95
   5   6  11   14.15    1.36
   5   7   8   42.43    1.35
   6   6  11    1.40    1.33
   8   5  12   18.85    1.34
   9   7   0   57.90    0.92
  12   7   3   27.32    1.06
  13   6   6    0.27    0.72
   0   3  13  331.37    2.11
   4   6  11   -0.24    1.37
   6   7   9   77.34    1.62
   7   6  11   42.54    1.47
   8   7   0  181.53    1.34
  10   5  11   17.68    0.96
  12   7   4    5.61    0.85
   2   5  12  104.15    1.62
   4   4  14   43.27    1.29
   4   7   4  129.73    1.28
   4   7   8   54.55    1.40
   5   4  14    8.43    1.09
   5   5  13    0.14    1.30
   5   7   9   70.23    1.59
   6   4  14   74.93    1.57
  11   6   9   16.76    0.94
   1   4  13  599.88    2.90
   1   5  11  116.73    1.42
   3   4  14    0.39    1.08
   4   3  15   71.71    1.34
   4   5  13   25.16    1.21
   5   3  15    2.15    0.90
   6   7   1  172.16    1.24
   8   6  11    0.83    1.02
   9   5  12   28.77    1.19
  10   6  10    5.65    0.93
  12   6   8    3.58    0.70
  12   7   5    9.69    0.86
  -1   3  12    3.94    0.73
   0   4  12    8.31    0.90
   2   6  10   64.81    1.32
   4   7   9  332.87    2.65
   6   3  15   13.52    0.95
   7   7   0   93.18    0.98
   8   8   4  123.30    1.46
   8   8   5    5.64    0.93
  11   7   7    6.01    0.87
   0   5   9  273.31    1.70
   3   5  13    1.10    0.98
   3   7   6  323.50    2.10
   3   7   7    2.10    0.94
   5   7  10   93.01    1.98
   6   6  12   74.45    1.72
   6   7  10   -0.11    1.19
   7   4  14    2.57    0.98
   7   5  13   11.10    1.28
   7   7  10   16.72    1.23
   7   8   4    5.74    0.84
   8   8   3    0.48    0.75
   9   8   3   51.52    1.07
   9   8   4    1.87    0.85
   9   8   5   17.43    0.98
  12   7   6    1.13    0.80
   3   7   8   38.54    1.26
   6   8   6   12.65    1.04
   7   6  12    7.31    1.40
   7   8   3   36.53    1.05
   7   8   7   10.25    1.24
  10   8   3    0.70    0.90
   0   5  10   20.32    0.77
   6   8   4    9.82    0.84
   8   7  10    6.13    1.02
   8   8   2   29.27    0.92
   8   8   7   31.49    1.18
   9   8   2    8.07    0.77
  10   8   2   42.62    1.08
   5   8   6   55.19    1.26
  -1   4  11   21.09    0.71
   0   4  13    6.14    0.96
   5   5  14   85.69    1.58
   5   7  11   -0.55    1.50
   5   8   5  227.84    1.83
   5   8   7    3.15    1.04
   6   7  11   44.26    1.50
   6   8   8  109.24    1.68
   7   8   2   37.81    0.87
   8   6  12   33.00    1.23
   8   8   8   20.86    1.11
  11   8   3   76.87    1.25
  11   8   4    2.22    0.85
  12   7   7   13.60    0.78
   1   4  14    3.21    0.93
   3   7  10   40.91    1.36
   4   4  15    0.73    0.90
   4   5  14    3.87    1.05
   6   5  14    2.76    1.06
   7   7  11    0.97    1.07
   9   8   1  184.65    1.49
  -2   3  11  142.58    1.16
   2   6  12  140.88    1.75
   3   4  15  124.10    1.56
   3   5  14   17.45    1.08
   4   6  13    1.67    1.24
   4   7  11    4.58    1.23
   7   8   9    7.59    1.27
   8   8   1   36.02    0.82
  10   8   7    2.95    0.84
   1   5  13   24.57    1.03
   1   6  11  151.79    1.64
   2   7   9   17.22    1.06
   4   3  16    5.59    0.85
   4   8   6  152.06    1.65
   4   8   7  130.61    1.70
   5   8   9  383.87    2.76
   6   8   2  138.04    1.30
   7   5  14   49.21    1.30
   8   8   9    4.15    1.11
  11   8   6    1.02    0.81
   0   5  12  306.08    2.04
   2   4  15    0.03    0.90
   2   5  14    2.69    1.07
   3   6  13  145.91    1.78
   3   7  11    2.06    1.12
   4   8   8   12.15    1.17
   5   8   3  100.79    1.15
   7   6  13   58.42    1.52
   7   8   1  244.20    1.57
  10   7  10    1.80    0.74
   2   7  10   12.93    1.08
   5   7  12   41.10    1.45
   6   7  12   -0.53    1.18
   9   7  11    5.09    0.91
  11   8   7   37.31    1.00
  12   8   5   19.70    0.91
  -1   5   9  253.64    1.56
   0   4  14   11.93    0.91
   0   6   8   19.94    0.76
   4   8   4  200.93    1.58
   5   8  10    3.63    1.23
   7   7  12   96.62    1.64
  -1   5  10  117.82    1.18
   0   6   7    1.61    0.56
   0   6  10  159.61    1.50
   1   4  15  209.27    1.89
   1   6  12   25.05    1.06
   3   8   6   53.81    1.17
   3   8   8    5.11    1.13
   7   9   5   -0.05    0.88
   8   8   0   77.94    1.01
   8   8  10    0.86    1.01
   8   9   5    5.22    0.89
  -1   4  13   10.37    0.80
   0   5  13  156.23    1.64
   1   5  14   84.63    1.44
   1   7   8   16.34    0.89
   4   5  15   10.75    0.93
   5   5  15    2.79    0.89
   5   6  14    8.84    1.08
   5   8   2    5.31    0.58
   6   8   1  191.91    1.33
   6   9   6    8.58    1.18
   7   9   7    7.45    1.01
  -1   5  11   11.34    0.72
   0   6  11  136.24    1.55
   1   7   7   30.48    0.91
   1   7   9   36.61    1.07
   3   5  15    4.27    0.91
   3   8   5   49.13    1.03
   3   8   9   28.98    1.33
   4   4  16    2.60    0.79
   4   6  14   57.42    1.34
   6   6  14   17.20    1.13
   6   8  11   51.16    1.57
  10   9   4    0.43    0.80
  10   9   5    4.52    0.91
  -2   4  11   61.57    0.93
   3   6  14    0.38    0.97
   5   8  11   16.79    1.33
   7   8  11    1.80    0.94
   7   9   3    3.72    0.74
   9   8  10    0.92    0.78
  10   9   6   12.65    0.96
   1   6  13   19.35    1.05
   2   5  15   97.62    1.48
   3   8  10   10.64    1.22
   4   8  11   88.70    1.73
   5   9   6  103.56    1.50
   6   7  13   37.80    1.36
   2   6  14   50.04    1.34
   2   8   8   17.34    1.11
   3   8   4  362.05    1.97
   5   9   8  143.52    1.82
   6   9   3  122.54    1.39
   7   7  13    2.04    1.04
  11   9   3    4.91    0.83
  11   9   5   10.08    0.86
  -2   4  12  113.44    1.21
   2   8   9   10.99    1.10
   3   8  11   42.87    1.57
   7   9   9    3.32    0.95
   2   8  10  113.79    1.80
   4   8   2   51.47    0.81
   4   9   7  105.31    1.60
   4   9   8    1.85    1.10
   5   8   1   87.21    0.93
   5   8  12    7.09    1.17
   5   9   9    0.03    1.15
   6   8  12   13.24    1.15
   8   9   9    6.83    0.85
  -1   5  13   20.20    1.02
  -1   6   9   41.22    0.85
   1   5  15   10.07    0.95
   1   7  12   23.70    1.25
   4   8  12   23.73    1.27
   4   9   5  246.73    1.88
   6   8   0   22.96    0.62
   6   9  10   17.09    1.29
  10   9   8    1.32    0.71
  -1   6  10   88.02    1.12
   0   7   8    1.69    0.69
   2   8   5   53.66    1.02
   4   6  15   -0.09    0.82
   4   9   9  114.33    1.78
   5   6  15    2.17    0.80
   5   9   3   48.73    0.94
   6   9   2    1.67    0.63
   7   9  10    1.83    0.88
  11   9   7    5.39    0.72
  -2   5   9  122.18    1.09
  -2   5  10   16.26    0.68
  -1   6  11   24.15    0.87
   2   8  11    8.68    1.11
   3   5  16   10.63    0.81
   3   6  15   11.53    0.92
   4   7  14   -0.04    0.93
   5   7  14    5.41    0.95
  12   9   5   11.34    0.67
   1   8   8    1.58    0.88
   1   8   9   30.53    1.12
   3   9   6   10.44    0.95
   3   9   7   15.25    1.10
   3   9   8   37.17    1.34
   4   9  10   -0.50    1.19
   7   9   1   -0.06    0.56
   0   5  15  156.26    1.66
   1   8   7  375.12    2.25
   1   8  10   19.77    1.24
   2   5  16    7.85    0.90
   3   9   9   54.89    1.53
   5   8  13   62.21    1.49
   5   9  11   20.11    1.39
   7  10   5   22.32    0.97
   8  10   4   11.96    0.99
   8  10   6   45.58    1.11
  -1   5  14    6.92    0.93
   3   9   5   92.94    1.29
   3   9  10   39.69    1.44
   6  10   5    0.80    0.84
   7   9  11   11.53    0.94
   7  10   4    1.04    0.79
   9   9  10    5.99    0.69
   9  10   6    1.22    0.82
   0   7  12   16.12    0.97
   1   8   6    1.57    0.72
   2   7  14    8.07    0.98
   4   9   3   90.11    1.11
   4   9  11   48.32    1.48
   5   9   2   29.96    0.77
   6   9   1   44.27    0.85
   8  10   3   11.69    0.78
  10  10   4   21.52    0.92
   2   9   8   19.66    1.21
   5  10   6    1.30    0.93
   5  10   8   11.74    1.10
   8   9  11    2.52    0.72
   2   9   9   62.39    1.48
   3   9  11   17.95    1.24
   5   9  12   26.69    1.36
   6  10   9    4.32    0.94
   7  10   9   10.24    0.88
   9  10   8   -0.44    0.73
  -2   5  13  101.73    1.27
   2   8  13    0.84    0.94
   2   9  10   11.67    1.17
   4   7  15   -0.81    0.75
   4   9  12   65.59    1.60
   4  10   7   45.17    1.28
   5  10   9   87.66    1.51
   6   9  12    8.11    0.95
   8  10   9   -0.53    0.73
   9  10   2    1.57    0.70
  10  10   7   13.32    0.73
  11  10   4    3.73    0.71
   0   8   8    7.13    0.82
   0   8   9   29.04    1.02
   3   7  15    2.93    0.81
   4   8  14    2.82    0.96
   4  10   6    6.25    0.95
   4  10   8  191.20    1.99
   7   9  12    2.34    0.77
  -2   6   9   34.18    0.74
  -2   6  10   81.84    1.03
  -2   6  11    0.76    0.72
   2   6  16   26.79    0.93
   2   9   5  182.93    1.67
   2   9  11   44.95    1.34
   3   9  12    8.84    1.09
   4   9   2   18.99    0.67
   4  10   5   59.36    1.18
   5   9   1   81.87    0.98
   7  10  10    2.03    0.82
  11  10   6    1.19    0.57
  -2   6   8  245.65    1.46
  -1   7   7   26.14    0.72
   0   6  15    3.09    0.86
   0   8   7   69.79    1.10
   1   8   4    0.59    0.58
   1   9   8    3.92    0.99
   1   9   9   74.48    1.43
   3  10   7    4.05    1.02
   5   9  13    4.66    1.04
   5  10   3    4.43    0.69
   6  10   2    1.90    0.72
   8  10  10    4.63    0.68
   0   8   6    3.56    0.66
   1   6  16   16.91    0.94
   1   9  10  203.14    1.98
   3  10   6    0.85    0.89
   3  10   9   22.74    1.27
   6  10  11    0.31    0.86
  -1   7   6  347.47    1.72
   4  10  11    5.84    1.08
   7  11   5    3.46    0.94
   8  11   5    0.80    0.84
   8  11   6   -0.12    0.78
  -1   7  13    1.07    0.80
   3  10   5  304.16    2.03
   8  11   4    0.31    0.80
   9  11   6   33.22    0.92
   3  10  11   20.93    1.38
   6  11   8   12.09    0.90
   9  11   4    1.72    0.71
   3   8  15    0.69    0.71
   4  10   3   14.28    0.73
   8  11   8    1.58    0.66
 -10 -13   8   11.18    0.90
  -9 -13   7   -0.31    0.96
  -8 -13   4   22.42    1.22
  -7 -12   0  182.77    2.07
  -6 -12   1    7.43    1.16
  -6 -12   6    3.36    0.96
  -5 -11   7    2.30    0.95
  -4 -11   2   60.78    1.22
  -4 -11   4  316.48    2.10
  -3 -10   0    1.31    0.57
  -2  -9   0   20.93    0.71
 -12 -11  -1   68.85    1.42
 -11 -13   3    0.04    0.94
 -10 -13   3   26.94    1.16
  -9 -13   6   51.98    1.40
  -8 -11  -2   12.13    1.15
  -6 -12   2    3.80    1.14
  -4 -10   7   55.69    1.08
  -3 -10   1   66.02    1.08
  -3 -10   4  130.86    1.29
  -2  -9   1  404.65    1.91
  -2  -9   3   44.11    0.78
  -2  -8  -2   52.94    0.85
 -12 -13   4    3.77    0.83
 -12 -13   8    3.43    0.74
 -10 -13   7   25.61    1.11
  -9 -13   4   15.57    1.14
  -9 -13   5   16.61    1.11
  -9  -9  -4  125.55    1.70
  -6 -12   3   41.30    1.35
  -6 -12   5   28.69    1.17
  -6 -11  -1   14.80    1.09
  -5 -11   0  376.37    2.40
  -3 -10   2  204.66    1.59
  -3 -10   3  505.60    2.32
 -11 -13   4   61.57    1.29
 -11 -13   7    4.89    0.86
 -10 -13   4    0.82    1.01
 -10 -13   5    9.53    1.00
  -9 -10  -3   61.63    1.40
  -8 -10  -3   14.09    1.07
  -8  -9  -4   11.16    1.08
  -7 -12   1  114.89    1.82
  -7 -12   7    8.99    0.97
  -5 -11   6   10.45    1.03
  -5 -10  -2   34.32    1.05
  -4 -10  -1   65.52    1.15
 -12 -13   6   13.87    0.91
 -11 -13   6   43.55    1.22
 -11 -11  -1    0.18    1.14
 -10 -12  10   10.17    0.95
  -3  -9   6    4.30    0.64
 -10 -12   1    1.69    1.28
  -7 -12   2   41.22    1.40
  -7 -12   6   54.01    1.29
  -7 -11  -1   18.50    1.18
  -5 -11   1  415.33    2.49
  -5  -7  -5    0.34    0.59
  -4 -10   6  297.03    1.88
 -11 -10  -2    7.67    1.36
 -10 -11  -1    3.98    1.14
  -7 -12   3    0.84    1.12
  -7 -11   9  100.28    1.42
  -5 -11   2  392.74    2.43
  -5 -11   5    3.87    0.89
  -5  -9  -3   49.77    1.04
  -4 -10   0   35.38    0.97
 -11 -12  10    4.51    0.87
 -11  -9  -3    5.35    1.26
  -8 -12   2   48.13    1.44
  -8 -12   7   17.73    1.20
  -7 -12   4   91.22    1.59
  -5 -11   3  145.36    1.65
  -5 -11   4  424.54    2.49
  -5  -8  -4   31.37    0.85
  -4  -9  -2   21.30    0.82
 -14 -10   0   42.12    1.09
 -12 -12  10   14.52    0.87
 -11 -12   2    1.43    1.00
 -10 -12   9   16.19    1.06
  -9 -12   2    2.80    1.34
  -6 -11   7   17.81    0.93
  -5 -10  -1    4.04    0.85
  -4 -10   1   24.44    0.90
  -3  -9   0  123.30    1.20
  -3  -9   5  120.37    1.15
 -13 -11   1    8.86    0.99
  -9 -12   8   -0.22    0.94
  -8 -12   3   43.40    1.38
  -8 -12   6   43.12    1.24
  -7 -11   0  264.62    2.25
  -7 -10  -2   39.45    1.18
  -6 -11   1    8.05    1.06
  -6  -9  -3  123.08    1.40
  -4  -8  -3   35.25    0.89
  -3  -8  -2    4.75    0.58
 -14 -11   2    2.21    0.81
 -13 -12   4    5.95    0.87
 -11 -11   0   11.63    1.18
  -9 -10  -2    1.62    1.10
  -8 -12   4  106.59    1.66
  -8 -10  -2   36.94    1.24
  -6 -11   6   37.17    1.25
  -6  -8  -4    9.84    0.75
  -4 -10   2  342.77    2.03
  -4 -10   4   62.78    1.06
  -4  -7  -4  115.21    1.11
  -3  -9   1   25.55    0.75
  -3  -9   4    2.50    0.63
 -13 -12   9   21.50    0.93
 -12 -12   9    3.90    0.86
 -11 -12   3   15.93    1.09
 -11 -12   9    8.54    0.89
 -10 -12   3    6.96    1.11
 -10 -12   8   21.27    1.14
  -9 -12   3   35.64    1.32
  -9 -11   0    2.06    1.18
  -9  -9  -3   29.21    1.26
  -9  -8  -4    1.47    0.88
  -8 -11   0    4.83    1.17
  -7 -11   8   34.03    1.07
  -7  -9  -3    3.00    0.85
  -6 -11   2    4.61    1.04
  -6 -10  -1   -0.02    0.89
  -5 -10   0  107.08    1.37
  -5 -10   7   20.70    0.86
  -3  -9   2   25.57    0.74
 -13 -12   5    1.55    0.86
 -12 -12   4    7.74    0.93
  -9 -12   5  166.78    1.99
  -8 -11   9   15.20    1.04
  -8  -9  -3   80.72    1.35
  -7 -11   1   94.04    1.60
  -6 -11   3  190.28    1.90
  -6 -11   5   15.45    1.04
  -4  -9  -1  203.91    1.54
  -4  -9   7   43.17    0.84
 -13 -12   7   15.33    0.96
 -13 -12   8    0.27    0.77
 -12 -12   8    1.40    0.90
 -11 -12   4    0.25    0.98
 -10 -12   4   31.29    1.24
 -10 -12   7    3.52    0.94
 -14 -10   1    5.42    0.94
 -12 -12   5    1.97    0.88
 -12 -12   6   23.32    1.15
 -11 -11   1   23.80    1.39
 -11 -11  11   64.76    1.17
 -10 -12   5   28.01    1.20
  -7 -11   7   15.25    0.97
  -5 -10   1  182.84    1.64
  -5 -10   6  193.95    1.64
  -5  -8  -3   94.05    1.11
  -5  -7  -4   72.04    1.00
  -3  -8  -1   20.58    0.67
 -13  -9  -1    2.33    1.20
 -11 -12   6   -0.09    0.92
 -10 -11   1   18.91    1.41
  -7 -11   2   32.08    1.28
  -6 -10   0   82.73    1.44
  -6 -10   8  153.49    1.49
  -4  -9   0   43.44    0.90
 -12 -11  11    1.96    0.76
 -10 -11  10    5.32    0.93
  -9 -10  -1    5.15    1.13
  -8 -11   8   13.01    0.93
  -7 -11   6   13.78    1.00
  -4  -9   6  145.58    1.25
  -4  -8  -2   50.03    0.87
 -13 -11  11    1.37    0.69
 -12 -11   2    2.47    0.98
  -9 -11   9    2.86    0.90
  -8 -11   2   -0.54    1.09
  -7 -11   4   14.41    1.11
  -5 -10   3  181.67    1.62
  -5  -9  -1   87.76    1.17
  -3  -8   0   92.15    0.97
 -15  -9   1   -0.03    0.76
 -10  -8  -3    0.58    1.11
  -7 -10   0    1.01    1.13
  -7  -9  -2  117.58    1.44
  -6  -8  -3   14.98    0.77
  -6  -7  -4    4.69    0.59
  -4  -9   1  465.12    2.14
  -4  -7  -3  279.74    1.55
 -13 -10   1    8.74    1.07
 -11 -11  10   38.16    1.06
 -11 -10   0    5.75    1.12
  -9  -9  -2   58.78    1.36
  -8 -11   3   21.71    1.21
  -8 -11   7   14.70    1.00
  -8  -9  -2   28.23    1.07
  -6 -10   1   10.86    0.95
  -6 -10   7   47.61    1.04
  -4  -9   5   12.65    0.66
 -15 -10   3    4.87    0.72
 -15  -8   0    1.34    0.83
 -14 -11   5    2.18    0.85
 -12 -11  10   26.99    1.03
  -9 -11   8   25.29    1.04
  -9  -8  -3   56.93    1.23
  -8 -11   4   71.73    1.45
  -8 -11   6    0.42    0.94
  -8 -10   0   65.11    1.42
  -8  -8  -3    0.02    0.89
  -8  -7  -4    4.98    0.84
  -4  -9   2   50.34    0.90
  -4  -9   4  171.79    1.35
 -13 -11   4    3.04    0.88
 -11 -11   3   13.26    1.13
  -9 -11   3    0.78    1.08
  -6 -10   2  376.81    2.30
  -6 -10   6    4.59    0.95
  -6  -9  -1   45.19    1.02
  -5  -9   0    4.07    0.71
  -4  -8  -1  346.06    1.76
 -14 -11   6    6.15    0.86
 -14 -11   7   15.61    0.99
 -14 -11   8    2.58    0.86
 -12 -10   1    0.38    1.03
 -10 -11   3   52.99    1.40
  -9 -11   4   32.35    1.42
  -9 -11   7    0.71    0.91
  -7 -10   1    5.60    1.01
  -5  -9   7   14.40    0.73
 -13 -11   5   11.26    0.94
 -13 -11   9   -0.73    0.84
 -12 -11   4    0.87    0.97
 -12 -11   9   33.54    1.08
 -11  -9  -1    7.17    1.18
 -10 -11   8    1.33    0.90
  -9 -11   5   17.19    1.13
  -6 -10   3    5.55    0.91
  -5  -7  -3   14.75    0.63
 -15  -9   2    8.35    0.87
 -13 -10  12   19.80    0.87
 -11 -11   4   36.02    1.26
 -11 -11   8   43.60    1.28
 -10 -11   4    0.64    1.06
  -8 -10   1    0.85    1.06
  -8 -10   9   56.72    1.15
  -5  -9   1  402.84    2.08
 -12 -11   6   10.94    1.16
 -12 -11   7   35.76    1.26
 -12 -11   8    7.82    0.91
 -10 -11   5  151.03    1.79
 -10 -10   1    5.48    1.13
  -7 -10   2   36.39    1.19
  -7 -10   7   15.85    0.92
  -6  -9   0   59.21    1.08
  -6  -8  -2  129.67    1.29
  -5  -9   6  258.37    1.73
  -4  -8   0  151.39    1.22
 -11 -11   6   88.63    1.48
 -11 -10  11   14.67    0.96
  -6  -9   8   40.43    0.98
  -5  -9   2  225.40    1.61
  -5  -8  -1   89.69    1.06
 -12 -10   2   75.79    1.46
  -8 -10   8   88.97    1.38
  -7 -10   3    2.65    0.97
  -7 -10   6   33.38    1.05
  -7  -8  -2   35.97    0.93
  -6  -7  -3    1.62    0.57
  -5  -9   5   19.90    0.76
  -4  -8   6   43.81    0.78
 -15  -8   1    1.39    0.81
 -14 -10   4    8.77    0.95
 -14 -10  11    0.13    0.69
 -13  -9   1    0.88    1.14
 -12 -10  11    1.12    0.90
 -11 -10   2    3.84    1.08
  -9  -8  -2    9.65    0.97
  -7 -10   4   19.59    1.04
  -7  -9   0   11.81    0.92
  -5  -9   3   10.04    0.73
  -4  -8   1  145.44    1.18
 -15 -10   6   23.09    0.93
 -15 -10  10    6.55    0.72
 -15  -7   0   20.15    1.01
 -13 -10  11   93.65    1.28
 -11  -9   0  158.82    1.90
  -9 -10   2   19.15    1.18
  -9  -7  -3    6.48    0.83
  -7  -9   9   21.80    0.92
  -6  -9   1  148.47    1.45
 -15 -10   8    7.69    0.87
 -14 -10   5    0.95    0.98
 -14  -9   2   34.81    1.15
 -12 -10   3   62.25    1.38
  -8 -10   3   40.60    1.23
  -8 -10   7   18.39    0.95
  -6  -9   7   32.85    0.97
  -5  -7  -2  117.66    1.07
 -14 -10  10   36.71    1.02
 -13 -10   4   15.26    1.04
 -11 -10  10    7.25    0.90
  -9 -10   3   79.22    1.47
  -9 -10   8   84.99    1.43
  -8 -10   4   60.51    1.31
  -8 -10   6    8.77    0.94
  -6  -8  -1  188.57    1.47
  -4  -8   4  258.85    1.47
 -16  -9   5    1.59    0.67
 -14 -10   6   43.02    1.11
 -13 -10  10   12.27    0.94
 -12 -10  10   14.26    0.94
 -12  -9   1   68.89    1.45
 -11 -10   3  101.90    1.60
 -10 -10   3   41.04    1.30
 -10 -10   9    1.34    0.84
  -7  -9   1   67.88    1.23
  -6  -9   2    0.54    0.74
 -16  -8   3    5.31    0.73
 -14 -10   7   15.00    0.96
 -14  -8   1    9.35    1.12
 -13 -10   5   24.94    1.09
  -9 -10   4  199.22    1.92
  -9 -10   7    3.76    0.96
  -6  -9   3   72.25    1.15
  -6  -9   6  276.68    1.81
 -16  -9   6    6.69    0.81
 -15  -8   2    4.46    0.86
 -13 -10   9   28.82    1.06
 -11 -10   4    4.04    1.06
 -10 -10   4   95.02    1.54
 -10 -10   8    4.22    0.89
  -9 -10   5   96.73    1.49
  -7  -9   8  270.49    1.79
  -6  -9   4   34.25    0.96
  -6  -7  -2    3.39    0.56
 -13 -10   6   17.78    1.04
 -13 -10   7   17.59    1.17
 -12  -9  12   33.39    1.00
 -10 -10   5   41.43    1.40
  -9  -9   1    2.05    1.02
  -8  -8  -1   36.21    1.05
  -7  -9   2  438.05    2.40
  -5  -8   1  185.81    1.36
 -16  -9   7    8.79    0.75
 -16  -7   2   11.33    0.82
 -14  -9  12    8.76    0.77
 -14  -7   0   21.03    1.16
 -12 -10   7   71.95    1.48
 -11 -10   6    6.04    1.19
 -11 -10   8    3.92    0.96
 -10 -10   6   26.98    1.14
  -9  -9  10   19.84    0.98
  -8  -9   9   52.54    1.04
  -6  -8   0   24.16    0.78
 -16  -9   8   17.34    0.82
 -16  -9   9    6.46    0.71
 -15  -9   5    0.31    0.86
 -15  -9  11    0.73    0.78
 -15  -7   1    8.67    0.91
 -12  -9   2   78.42    1.49
  -7  -9   7   21.65    0.87
  -5  -8   2   59.01    0.89
  -5  -8   6    3.26    0.57
  -5  -7  -1  124.41    1.08
 -16  -8   4    1.09    0.73
 -16  -6   1    1.05    0.77
 -15  -6   0   -2.16    0.83
 -14  -9   4    5.52    0.93
 -13  -9   3   14.40    1.07
 -12  -7  -1    2.15    1.18
 -11  -9  11    6.08    0.96
  -9  -6  -3   34.34    0.97
  -8  -7  -2    5.85    0.75
  -7  -9   3   37.22    1.06
  -7  -9   6  187.51    1.67
 -15  -9   6    3.67    0.85
 -15  -8   3    0.91    0.86
 -14  -8   2   29.36    1.13
  -9  -9   2    0.64    0.98
  -8  -9   8   60.60    1.18
  -7  -9   4  384.00    2.23
  -7  -8   0   13.79    0.80
  -6  -8   8   20.70    0.72
  -5  -8   3   92.14    1.03
  -5  -8   5  139.32    1.20
 -15  -9   7   -0.93    0.89
 -15  -9  10   14.19    0.85
 -13  -9  11    2.49    0.90
 -12  -9   3   29.57    1.20
 -12  -9  11  133.24    1.48
 -10  -9  10    1.33    0.86
  -8  -9   3   23.17    1.05
  -6  -8   1   71.01    1.01
 -16  -8   5    1.07    0.80
 -15  -9   8    3.17    0.84
 -15  -9   9    8.22    0.88
 -14  -9   5   11.61    0.98
 -13  -9   4   62.30    1.34
  -8  -9   7   54.28    1.19
 -16  -7   3   14.96    0.87
 -14  -8  13    8.84    0.79
 -12  -8   1   46.92    1.31
 -11  -9   3   33.27    1.23
 -10  -9   3   62.89    1.49
  -9  -9   3  173.96    1.76
  -8  -9   4   68.72    1.26
  -7  -8   9   76.38    1.10
  -6  -8   7   37.17    0.87
  -5  -7   0   11.56    0.57
  -5  -7   8   70.78    0.91
 -17  -6   3    9.31    0.73
 -14  -9   6    1.75    0.91
 -13  -9  10    2.21    0.87
 -12  -9   4   26.97    1.18
 -12  -9  10    2.85    0.99
 -10  -9   9  185.44    1.76
  -9  -9   8  296.75    2.00
  -8  -9   5   29.16    1.03
  -8  -8  10  229.74    1.64
  -7  -8   1   21.40    0.86
  -6  -8   2  315.69    1.80
 -16  -8   6   91.64    1.25
 -14  -9   7    4.44    0.92
 -14  -9   8  111.90    1.47
 -13  -9   5    2.99    1.03
 -10  -7  -1    3.61    1.01
  -9  -9   4   32.85    1.13
  -6  -6  -2  253.75    1.46
 -17  -5   2    2.05    0.63
 -16  -6   2   26.38    0.93
 -15  -8  12    0.96    0.74
 -13  -9   6   17.03    1.07
 -12  -7   0    1.95    1.20
 -11  -9   4   81.73    1.44
 -11  -9   9    4.65    0.89
 -11  -8  12   28.49    1.01
 -10  -9   4   97.86    1.49
 -10  -8   1   59.84    1.49
 -10  -6  -2    2.63    1.02
  -9  -9   5  281.02    2.06
  -9  -9   7   23.79    1.00
  -9  -7  -1    1.44    0.84
  -8  -7  -1  801.44    2.96
  -6  -8   6   52.71    0.91
 -16  -8   7    2.56    0.77
 -15  -6   1   53.77    1.18
 -13  -9   7    5.91    0.98
 -13  -9   8   10.21    0.97
 -12  -9   9   41.54    1.12
 -10  -9   5   64.56    1.32
 -10  -9   8   91.02    1.36
  -7  -8   2   18.29    0.84
  -7  -8   8   12.63    0.78
  -6  -8   5  302.61    1.77
  -6  -7   0   31.12    0.73
 -16  -8   8   14.58    0.86
 -16  -8   9    5.64    0.84
 -14  -8  12   45.10    1.06
 -12  -9   6    5.80    1.01
 -12  -8  12  187.60    1.67
 -11  -9   6   15.81    1.10
 -11  -9   7  119.48    1.65
 -10  -9   6    0.85    0.92
  -9  -6  -2   35.34    0.95
  -9  -5  -3   69.74    1.12
  -7  -6  -2    1.19    0.53
  -5  -7   7  123.33    1.07
 -17  -7   6   31.56    0.88
 -15  -8  11    7.37    0.87
 -15  -7   3   11.07    1.00
 -14  -8   4   41.56    1.19
 -13  -8   3    0.39    0.98
 -13  -8  12    7.64    0.84
 -10  -8  11   -0.10    0.75
  -9  -8  10   75.40    1.19
  -8  -8   9    2.68    0.77
  -8  -6  -2   36.62    0.85
  -7  -5  -3   26.50    0.64
 -17  -6   4   -0.02    0.66
 -15  -8   6    0.40    0.82
 -11  -8   2  265.09    2.13
  -8  -8   2   32.28    1.01
  -7  -8   3  204.61    1.60
  -7  -8   7   64.13    1.00
  -7  -7   0   95.20    1.11
 -11  -8  11   32.80    1.06
 -10  -8   2    9.58    1.00
  -9  -8   2   15.29    0.98
  -7  -8   4  226.54    1.65
  -7  -8   6   60.14    1.07
 -16  -7   5    9.70    0.87
 -16  -6   3    2.96    0.82
 -15  -8   7   10.63    0.89
 -15  -8   8    5.22    0.99
 -15  -8   9   13.27    0.99
 -14  -8   5   10.44    1.00
  -8  -8   8   70.69    1.13
  -6  -7   1  161.22    1.24
 -17  -7   8    9.41    0.77
 -17  -7   9    3.54    0.77
 -17  -7  10   41.39    0.97
 -17  -5   3   20.67    0.82
 -15  -7  13    8.04    0.79
 -15  -6   2   10.56    0.99
 -14  -6   1   14.66    1.11
 -13  -8  11   17.65    0.96
 -11  -8   3   22.22    1.25
 -10  -8  10   29.62    0.92
  -8  -8   3  120.70    1.38
  -6  -7   8  197.09    1.35
 -16  -7  12   16.41    0.77
 -14  -8   6    5.90    0.97
 -14  -8  10   27.40    1.00
 -10  -8   3   16.03    1.02
  -9  -8   3    2.49    0.87
 -17  -6   5   13.25    0.75
 -16  -7   6   31.97    0.99
 -16  -5   2    1.27    0.75
 -15  -5   1    0.58    0.93
 -14  -8   9   62.94    1.24
 -14  -7  13   16.46    0.83
 -13  -8   5   14.38    1.05
 -13  -8  10    0.04    0.97
 -12  -8   4  104.85    1.52
 -11  -8  10    1.44    0.80
 -11  -7   1  188.48    1.84
  -8  -8   7    7.43    0.74
  -7  -7   1   19.58    0.75
  -6  -7   2   36.95    0.76
 -16  -7  11   12.26    0.87
 -14  -8   8   45.78    1.17
 -12  -8  10   28.38    1.01
 -11  -8   4  159.02    1.70
 -10  -5  -2    0.26    0.90
  -9  -8   8   90.20    1.21
  -9  -6  -1    2.15    0.78
  -8  -8   5  175.81    1.54
  -8  -6  -1   75.64    1.09
  -7  -7   9   34.39    0.82
 -16  -7   7   15.24    0.87
 -16  -6   4   45.84    1.09
 -15  -7   5    0.98    0.98
 -15  -7  12   26.32    0.95
 -13  -8   6    9.15    1.00
 -12  -8   5   17.66    1.06
 -10  -8   4  261.17    1.98
  -8  -7   1  122.36    1.34
  -8  -7  10    2.52    0.70
  -6  -7   7  108.99    1.03
 -17  -6   6    6.47    0.76
 -16  -7  10    3.28    0.82
 -13  -8   7   10.30    1.00
 -13  -8   8   24.23    1.06
 -13  -6   1    4.58    1.00
 -12  -8   9   11.87    0.92
 -11  -8   5   25.79    1.08
 -11  -7  12   66.91    1.15
 -10  -8   8  120.88    1.40
  -9  -8   5   43.70    1.06
  -9  -8   6    2.95    0.82
  -9  -5  -2  191.71    1.55
  -6  -7   3  215.61    1.41
 -16  -7   9   38.98    1.03
 -15  -6   3   39.33    1.04
 -13  -7   3    3.34    0.98
 -12  -8   6   44.07    1.20
 -12  -8   7   35.41    1.13
 -11  -8   6   14.52    1.15
 -10  -8   6  166.03    1.62
  -8  -5  -2  225.69    1.49
  -7  -7   2   90.50    1.09
  -6  -7   4    0.88    0.55
  -6  -7   6  252.52    1.49
 -17  -6  12   11.70    0.72
 -15  -7   6    4.88    0.87
 -15  -7  11    6.36    0.85
 -13  -7  12  131.79    1.50
 -13  -5   0   39.32    1.36
 -12  -7  12   20.62    0.92
 -11  -8   7    5.39    0.92
 -11  -7   2  105.25    1.47
  -7  -7   8   21.82    0.74
 -17  -6   7   11.38    0.79
 -17  -4   3    6.91    0.74
 -16  -6  13   11.54    0.71
 -16  -5   3    0.55    0.81
 -10  -7  11  103.46    1.29
  -8  -7   2    1.17    0.71
 -18  -5   7    8.08    0.74
 -17  -6   8    1.83    0.72
 -14  -7   5    5.41    0.97
 -14  -7  11   14.22    1.02
 -14  -5   1    3.57    1.11
 -13  -7   4   16.94    1.20
 -12  -7   3   16.44    1.03
 -10  -7   2  126.06    1.49
 -10  -6   0   63.83    1.22
  -9  -7   2  206.59    1.68
  -9  -7  10  128.96    1.32
  -7  -7   3   94.15    1.09
 -18  -4   5    0.90    0.65
 -17  -6   9    8.18    0.80
 -17  -6  10    1.66    0.74
 -15  -7   8   12.70    0.92
 -15  -7   9    2.72    0.84
 -11  -7  11    3.94    0.88
  -9  -6   0    2.38    0.78
  -7  -7   7   82.42    0.99
 -18  -5   8    0.72    0.71
 -16  -6   6   15.43    0.99
 -15  -6  13   15.69    0.84
 -14  -7   6    2.17    0.94
 -13  -7  11    0.51    0.82
 -13  -6   2    2.22    0.94
 -12  -7  11   64.79    1.22
 -11  -7   3   78.29    1.31
  -8  -7   3  160.80    1.41
  -7  -7   4    2.19    0.60
  -7  -7   5   46.07    0.95
  -7  -7   6  323.00    1.73
 -13  -7   5    9.06    1.00
 -12  -7   4   22.13    1.06
 -11  -6   1   16.55    1.15
 -10  -7   3   81.89    1.27
 -10  -7  10   -0.09    0.80
  -9  -7   3   49.69    1.04
  -8  -7   8    3.15    0.63
 -18  -3   4    2.46    0.58
 -16  -6   7   59.05    1.22
 -16  -5   4    4.19    0.87
 -16  -5  14    5.74    0.71
 -14  -7   8   46.30    1.18
 -14  -7   9   11.36    0.95
 -13  -7  10   24.54    1.12
 -12  -6  13   12.32    0.91
  -9  -7   9    7.57    0.71
 -18  -4   6    1.08    0.69
 -17  -5   6    4.99    0.80
 -17  -4   4   25.98    0.88
 -15  -6   5   31.85    1.04
 -13  -6  13   26.39    0.93
 -12  -7  10   14.72    0.91
 -12  -4  -1    2.24    1.04
 -11  -7   4  297.33    2.06
 -11  -7  10   53.03    1.07
  -9  -5  -1    2.44    0.71
  -8  -7   4   91.65    1.15
  -8  -7   7   83.33    1.05
  -7  -6   1   34.28    0.76
  -6  -6   8   89.76    0.93
 -16  -6   9    2.27    0.80
 -16  -6  10   24.75    0.96
 -15  -6  12    1.16    0.80
 -15  -5   3   13.37    0.88
 -13  -5   1   85.05    1.41
 -12  -7   5   69.09    1.29
 -10  -7   4  159.17    1.55
 -10  -7   9    1.19    0.87
  -9  -7   4   82.50    1.17
  -9  -7   8   11.82    0.85
  -8  -7   5    5.15    0.68
 -17  -5   7    0.25    0.84
 -17  -5  12    7.29    0.75
 -17  -3   3    5.65    0.75
 -12  -7   6    3.88    0.93
 -12  -7   9   92.30    1.33
 -11  -7   5  106.58    1.40
  -9  -7   5  194.60    1.58
  -9  -4  -2    2.41    0.61
 -16  -4   3   13.25    0.84
 -15  -6   6   21.59    0.99
 -15  -6  11   13.63    0.99
 -14  -6  12   24.20    0.97
 -13  -4   0   72.28    1.43
 -12  -7   8   -0.48    0.87
 -10  -7   5   21.57    0.93
 -10  -7   8  235.35    1.72
  -9  -6  11  110.02    1.18
  -8  -4  -2  133.03    1.14
  -7  -6   9  217.36    1.37
 -18  -4   7   -0.47    0.65
 -17  -5  11   13.53    0.87
 -16  -4  15   15.49    0.66
 -15  -6   7   15.36    1.10
 -15  -4   2    0.00    0.83
 -14  -5  14    9.58    0.83
 -14  -4   1   26.27    1.13
 -11  -7   6    5.62    0.89
 -11  -7   7    1.19    0.84
 -11  -6  12   75.07    1.12
 -10  -7   6  101.10    1.29
  -8  -6  10  169.11    1.31
 -17  -5   9   57.04    1.09
 -17  -5  10    7.66    0.80
 -15  -6  10   32.76    1.03
 -15  -3   1    8.15    0.93
 -12  -6  12    1.97    0.81
 -12  -5   1    5.84    1.06
 -18  -4   8   23.62    0.84
 -18  -2   4    9.09    0.68
 -16  -5   6   11.96    0.98
 -15  -6   9  110.94    1.42
 -14  -6  11   16.73    0.91
 -10  -6   2    3.18    0.80
  -8  -6   2   19.15    0.74
 -18  -4   9    6.14    0.73
 -18  -4  11    3.44    0.66
 -16  -5  12   25.76    0.91
 -15  -5  13    7.15    0.84
 -14  -5   3   30.29    1.05
  -7  -6   8    3.92    0.50
 -18  -4  10   19.39    0.81
 -18  -3   6    3.99    0.71
 -16  -4   4   13.87    0.81
 -13  -6   5   11.63    1.13
 -13  -6  11   90.17    1.30
 -11  -6   3   48.81    1.10
 -11  -6  11   17.91    0.92
 -10  -4  -1    1.43    0.88
  -9  -6  10    0.73    0.70
  -8  -6   9   67.99    0.94
  -7  -6   3   17.60    0.64
 -16  -5   7   14.13    0.89
 -16  -4  14   13.15    0.77
 -15  -5   5   -0.22    0.82
 -14  -6   7    2.99    0.92
 -14  -6   8   12.96    0.97
 -14  -6   9    2.11    0.89
 -12  -6   4   16.81    0.97
 -12  -6  11    1.13    0.78
 -10  -3  -2    6.74    0.90
  -7  -6   7    9.50    0.62
 -17  -2   3    9.52    0.71
 -16  -5   8   14.23    0.89
 -15  -4   3    0.91    0.79
 -14  -5  13   28.47    0.94
 -13  -6  10    8.83    1.03
 -10  -6   3  112.15    1.30
  -9  -6   3   67.06    1.03
 -17  -4   7   13.01    0.80
 -16  -5   9   42.94    1.06
 -16  -3   3   13.23    0.81
 -15  -5  12   11.31    0.89
 -14  -5   4   23.02    1.02
 -14  -4   2   34.23    1.05
 -13  -6   6   27.16    1.06
 -13  -5  13   18.11    0.97
 -12  -6   5   46.96    1.24
 -12  -5  13   83.91    1.21
 -10  -6  10   31.50    0.84
  -8  -6   8  126.54    1.16
  -7  -6   5   12.29    0.59
  -7  -6   6   -0.03    0.49
 -18  -3   7    0.13    0.68
 -16  -2   2   24.10    0.89
 -15  -5   6   17.82    0.95
 -13  -6   7    1.89    0.91
 -13  -6   8   26.19    1.05
 -12  -6  10    8.32    0.83
 -11  -6  10    1.61    0.74
  -9  -6   9   98.47    1.09
  -8  -6   4   24.49    0.73
  -8  -4  -1  185.06    1.34
 -18  -1   4    9.56    0.69
 -17  -4   8    0.70    0.73
 -17  -4  11   54.28    1.10
 -16  -3  15   12.48    0.70
 -15  -4  14    1.19    0.70
 -15  -3   2   68.64    1.15
 -15  -2   1    3.78    0.83
 -12  -6   6   20.88    0.98
 -11  -4   0    0.72    0.82
 -10  -6   4   32.59    0.91
  -9  -6   4   39.11    0.88
  -8  -6   7   34.56    0.82
 -18  -3   8   12.02    0.80
 -18  -3  12    8.14    0.67
 -17  -4   9   77.11    1.19
 -17  -4  10   11.97    0.86
 -17  -3  14   18.65    0.73
 -16  -4  13    3.53    0.75
 -14  -5   5   16.99    1.11
 -14  -5  12   15.22    0.87
 -12  -6   7   12.38    0.92
 -12  -6   8  103.80    1.36
 -11  -6   5  126.61    1.39
 -11  -6   9    9.73    0.81
 -10  -6   9    0.94    0.66
 -10  -5  12    3.56    0.74
  -9  -6   8    4.99    0.63
  -8  -6   5    6.67    0.61
 -18  -3  11    4.06    0.74
 -15  -5   8   83.14    1.31
 -15  -5   9   13.76    1.07
 -15  -5  10   33.87    1.03
 -14  -4  14   40.95    0.98
 -12  -4   1   44.62    1.23
 -11  -6   6    3.51    0.81
  -9  -6   5  128.45    1.24
 -18  -3  10   -0.27    0.71
 -17  -2   4    1.46    0.70
 -13  -5   4   36.37    1.08
 -13  -5  12   12.93    0.84
 -13  -4  14   10.36    0.86
 -12  -5   3   73.90    1.22
 -12  -5  12    9.48    0.89
 -11  -6   7  426.94    2.23
 -11  -5  12    2.94    0.72
 -10  -6   6  332.46    1.91
 -10  -6   7  161.04    1.42
 -17  -1   3    0.54    0.68
 -16  -4  12   17.14    0.87
 -15  -4  13    2.40    0.81
 -15  -3  15   30.82    0.81
 -14  -5  11   47.20    1.08
 -10  -5   2  151.54    1.40
  -9  -5  11   44.20    0.82
 -17  -3  13    1.32    0.68
 -16  -4   7   22.89    0.94
  -8  -5  10    4.52    0.58
  -7  -5   9  122.63    0.99
 -18  -1   5    6.96    0.66
 -18   0   4    6.20    0.64
 -16  -4   8   69.24    1.20
 -16  -4  11   10.20    0.83
 -16  -3  14    1.03    0.66
 -16  -2   3    7.96    0.86
 -15  -3   3   29.22    0.93
 -14  -5   7  120.22    1.46
 -14  -5   8   21.94    1.14
 -14  -5   9  237.81    1.88
 -13  -5   5    4.50    0.89
 -13  -5  11   11.21    0.87
 -12  -5   4    2.19    0.96
 -12  -2  -1   10.34    1.03
 -10  -5  11    1.94    0.71
  -9  -5   2   29.13    0.79
  -8  -5   2  315.08    1.66
 -17  -3   7    3.77    0.78
 -16  -4   9   -0.28    0.80
 -16  -4  10   14.58    0.89
 -16  -1   2    6.18    0.79
 -14  -4  13    5.00    0.85
 -13  -3   1    9.62    0.89
 -12  -5  11   34.97    1.05
 -11  -5  11   38.86    0.97
 -17  -3   8    2.05    0.88
 -17  -2   5   19.79    0.85
 -15  -4   6    6.81    1.00
 -15  -2   2    9.65    0.88
 -13  -5   6   73.62    1.26
 -13  -5  10   75.79    1.23
 -12  -4   2  178.19    1.68
 -10  -5   3    4.92    0.70
 -18  -2   8   13.31    0.79
 -18  -2  12    4.84    0.66
 -17  -3   9    7.27    0.92
 -17  -3  11    7.82    0.83
 -16  -2  15    5.11    0.65
 -14  -2   1   13.48    0.87
 -13  -5   7  212.16    1.78
 -13  -5   9   35.57    1.18
 -13  -4  13   50.67    1.12
 -12  -5   5   18.79    0.91
 -11  -5   4   10.34    0.92
  -8  -5   9  121.24    1.06
  -7  -5   8   83.43    0.84
 -18  -2  11    2.23    0.76
 -18  -1   6    8.34    0.73
 -17  -3  10    1.31    0.74
 -17  -2  14    6.32    0.62
 -16  -3  13   10.57    0.82
 -15  -4   7   90.83    1.41
 -15  -3  14   30.38    0.90
 -13  -5   8   98.89    1.36
 -12  -5  10   96.88    1.26
 -10  -5  10    7.64    0.77
 -10  -4   1    4.25    0.67
  -9  -5   3   52.81    0.88
  -8  -5   3   68.26    0.88
 -18  -2  10    2.47    0.71
 -16  -3   6   18.08    0.88
 -15  -4  10    2.73    0.98
 -15  -3   4  137.95    1.42
 -14  -4   5    4.38    0.84
 -14  -4  12    4.86    0.81
 -12  -5   6   11.67    0.87
 -11  -5  10   38.32    0.92
  -7  -5   7   96.58    0.90
 -18   1   4    8.18    0.63
 -15  -4   8   17.97    0.96
 -15  -4   9   66.87    1.21
 -14  -3   3   24.42    1.02
 -14  -3  14   21.97    0.91
 -12  -5   8   28.71    1.07
 -11  -5   5   41.31    0.96
 -10  -5   4  179.19    1.42
  -8  -5   8   64.25    0.86
 -16  -3   7    2.18    0.95
 -16  -3  12    6.98    0.81
 -15  -2  15   22.75    0.82
 -13  -4   4    0.48    0.82
 -13  -3   2  175.96    1.59
 -12  -3   1    8.17    0.83
 -11  -5   9    1.50    0.72
 -10  -5   9   12.00    0.69
  -9  -5   4    6.67    0.60
 -17  -2   7   31.81    1.03
 -16  -1   3   19.80    0.82
 -16   0   2  106.78    1.21
 -15  -2   3   46.45    1.09
 -14  -4   6   54.25    1.13
 -14  -4  11    0.67    0.79
 -13  -3  14  144.65    1.40
 -11  -5   6   93.14    1.18
 -11  -5   7   11.58    0.79
 -10  -5   5   62.59    0.98
  -9  -5   8   11.29    0.69
  -8  -5   5  142.96    1.13
  -8  -5   7  233.63    1.37
 -16  -3   8   52.78    1.12
 -16  -3  11    9.96    0.83
 -16  -2  14    5.49    0.69
 -15  -3   5    6.43    0.83
 -12  -4  12   15.91    0.79
 -10  -5   6   10.40    0.70
 -10  -3   0   -0.54    0.63
  -9  -5   5   76.76    0.96
 -16  -3   9    6.44    0.86
 -16  -3  10    1.79    0.81
 -16  -2   5    8.37    0.79
 -15  -1   2   19.19    0.91
 -14  -4   8  100.48    1.45
 -14  -4   9    1.69    0.99
 -14  -2   2   23.14    0.86
 -13  -4   5  100.98    1.32
 -13  -2   1   33.35    1.02
 -10  -5   7  207.52    1.48
 -18  -1   9    4.00    0.80
 -18  -1  12    1.69    0.64
 -18   0   6    5.53    0.71
 -17  -2  11    2.89    0.73
 -17   1   3    0.31    0.64
 -14  -3  13    5.04    0.89
 -14  -1   1  115.95    1.34
 -13  -1   0   13.55    0.93
 -12  -4   4    3.10    0.78
 -11  -4   3  165.25    1.42
 -18  -1  11   11.19    0.77
 -17  -2   9   21.31    0.89
 -17  -2  10    3.35    0.77
 -17  -1  14    0.93    0.60
 -16  -1  15    7.81    0.64
 -13  -4   6   10.39    0.87
 -11  -3   1   25.55    0.85
  -9  -4   2    5.39    0.58
 -16  -1   4    1.39    0.83
 -15  -2   4   18.77    0.96
 -15  -2  14    1.19    0.78
 -13  -3   3    1.23    0.77
 -12  -3   2    1.12    0.75
 -10  -4  11    0.19    0.64
 -15  -3   7   22.70    0.96
 -13  -4   7    3.34    0.83
 -13  -4   8   23.04    0.95
 -13  -4   9    2.99    0.82
 -13  -3  13   30.38    0.93
 -12  -4   5   26.21    0.91
 -11  -4  11   19.67    0.77
 -10  -4   3    3.40    0.62
  -8  -4  10    5.05    0.50
 -17  -1  13    7.82    0.70
 -15  -3   8  130.82    1.47
 -15  -3   9   13.31    0.92
 -15  -3  10   26.30    0.98
 -14  -3   5   33.16    0.96
 -14  -3  12  113.00    1.34
 -12  -4  10   19.70    0.99
 -12  -3  13  155.85    1.45
 -11  -4   4   22.16    0.81
 -16  -2   7   61.24    1.14
 -14  -2   3   24.72    0.86
 -14  -2  14   42.41    1.02
 -12  -4   6    3.05    0.78
 -11  -3  13   20.70    0.79
  -9  -4   3   26.73    0.69
  -9  -4  10    1.09    0.57
  -9  -2  -1    5.12    0.59
 -18   0   8   11.71    0.79
 -18   0  12   19.44    0.81
 -18   2   5   16.57    0.74
 -17   1   4   13.02    0.82
 -17   2   3    7.82    0.65
 -16  -2   8  100.97    1.43
 -16  -2  11   15.43    1.00
 -16  -1  14    0.12    0.69
 -15  -2  13    3.91    0.87
 -15  -1  15    5.86    0.65
 -14  -3   6   -0.10    0.80
 -13  -3   4  110.78    1.30
 -13  -2   2   63.13    1.07
 -12  -4   7    0.63    0.77
 -12  -2   1    1.39    0.74
 -11  -4  10   33.66    0.85
 -10  -4  10   72.01    1.03
 -17  -1   8    1.61    0.76
 -17  -1  12   17.68    0.84
 -16  -2   9   -0.17    0.82
 -16  -2  10   17.94    0.92
 -16  -1   5   35.09    0.93
 -14  -3  11  126.51    1.41
 -14  -1   2   12.97    0.84
 -13  -3  12    1.95    0.75
 -12  -4   8   31.81    0.94
 -11  -4   5   91.70    1.12
 -10  -4   4   18.76    0.70
  -8  -4   9    9.37    0.54
 -18   0  10   12.40    0.81
 -17  -1   9    5.92    0.80
 -17  -1  11   10.06    0.80
 -14  -3   7  169.69    1.56
 -14  -3  10   52.64    1.22
 -13  -2  14  106.62    1.27
 -13  -1   1    3.46    0.80
 -11  -4   6   13.62    0.75
 -11  -4   9  111.57    1.21
 -18   1   7   32.94    0.92
 -17  -1  10    1.30    0.76
 -15  -2   6   48.13    1.16
 -14  -3   8   97.87    1.31
 -14  -1  15   24.49    0.87
 -13  -3   5  105.06    1.27
 -12  -3  12   31.61    0.97
 -11  -4   7    9.47    0.73
 -11  -4   8    0.15    0.67
 -10  -4   5   98.96    1.06
 -10  -4   9    6.46    0.61
 -10  -2   0    5.95    0.72
  -9  -4   4    8.44    0.56
  -9  -4   9  116.67    1.05
 -16  -1  13   47.35    0.99
 -16   0   4  116.75    1.26
 -15  -2  12   33.71    0.97
 -14  -2  13    3.08    0.86
 -11  -3  12   11.08    0.79
 -10  -3  12   11.01    0.74
  -8  -4   8   52.52    0.73
 -18   2   6   12.58    0.75
 -18   3   5   10.13    0.66
 -16   1   3   19.89    0.79
 -15  -1   4   17.09    0.80
 -15  -1  14    0.36    0.78
 -13  -2   3    2.47    0.72
 -12  -3   4    9.25    0.78
 -10  -4   6  142.65    1.22
  -9  -4   5  223.82    1.37
  -9  -4   8   12.21    0.58
  -8  -4   5  121.27    1.00
 -18   1   8   11.14    0.80
 -17   1   5   10.69    0.77
 -17   2   4    1.64    0.74
 -13  -3   6  307.25    1.90
 -12  -2   2  143.62    1.36
 -11  -3   3   15.07    0.73
  -9  -4   6  205.56    1.32
  -8  -4   6    1.17    0.46
  -8  -4   7    1.83    0.44
 -18   1   9    3.95    0.79
 -18   1  12    1.89    0.63
 -16  -1   7    9.16    0.85
 -15  -2   8    7.96    0.87
 -15  -2   9   19.68    1.09
 -15  -2  10   23.57    0.96
 -15   0   3    2.22    0.79
 -14  -1   3   22.22    0.90
 -13  -3   7   56.50    1.08
 -13  -2  13    2.68    0.79
 -12  -3  11   37.56    0.92
 -18   1  10   -0.31    0.68
 -18   1  11   10.27    0.75
 -16   0  14   24.33    0.83
 -15   0  15  138.78    1.27
 -14  -2  12   50.19    1.04
 -13  -3   8  105.72    1.29
 -13  -3   9   22.27    0.90
 -12  -3   5    3.98    0.73
  -9  -3   2   30.75    0.68
  -9  -2   0    5.41    0.55
 -18   2   7   12.45    0.75
 -17   0   9    2.25    0.92
 -17   0  11   16.01    0.94
 -17   1  14    1.73    0.55
 -16  -1   9    2.83    0.98
 -16  -1  10   -0.64    0.95
 -15  -1  13   40.53    1.06
 -14  -1  14    0.90    0.72
 -13  -1   2    4.63    0.77
 -11  -3  11   33.18    0.83
 -10  -3  11  195.41    1.39
  -9  -3  11   36.99    0.72
 -18   3   6    3.54    0.67
 -17   1   6   31.52    0.90
 -14  -2   6   27.62    0.92
 -14   0   2    7.13    0.67
 -12  -3   6   56.67    1.01
 -12  -3  10    1.13    0.72
 -12  -1   1   41.49    0.90
 -10  -3   3    3.73    0.57
 -16   1   4    2.52    0.70
 -16   1  15    7.65    0.60
 -16   2   3    8.29    0.75
 -12  -3   7   42.17    1.05
 -12  -3   9   10.29    0.79
 -12   0   0    4.72    0.78
 -11  -2  13  125.04    1.21
 -10  -2   1   21.74    0.69
 -17   3   4   22.68    0.75
 -15  -1   6   44.42    1.02
 -15  -1  12   12.57    0.97
 -14  -2   7   33.07    0.97
 -14  -2  10   69.75    1.17
 -14  -1   4   11.31    0.76
 -13  -2  12    9.40    0.79
 -13  -1  14   49.89    1.04
 -12  -3   8   24.74    0.86
 -11  -3   5   36.86    0.84
 -11  -3  10   11.89    0.71
 -11  -2   2   43.28    0.86
  -8  -3  10   22.98    0.62
 -18   2   9   20.45    0.82
 -14  -2   8   34.63    0.99
 -14  -2   9   42.43    1.04
 -10  -3   4   17.37    0.65
 -10  -3  10   48.35    0.89
  -9  -3   3   46.57    0.73
  -9  -3  10  112.30    1.03
 -18   2  10    2.38    0.71
 -18   3   7    1.25    0.67
 -15  -1  11   19.56    1.04
 -14  -1  13   69.95    1.10
 -12  -1  14    3.36    0.75
 -11  -3   6  140.74    1.26
 -17   1   8    0.94    0.75
 -17   1  12   16.56    0.81
 -16   1   5   36.08    1.01
 -16   1  14   -0.19    0.66
 -15   1   3    1.45    0.65
 -15   2   2    8.86    0.77
 -13  -2  11   50.81    1.02
 -13  -1   3    0.90    0.65
 -11  -3   7    0.13    0.63
 -11  -3   8   58.91    0.95
  -9  -2   1  110.04    1.04
 -17   1   9    5.85    0.79
 -17   1  11    9.56    0.77
 -17   2   6    0.89    0.72
 -17   4   4   25.82    0.76
 -16   0   8    9.18    0.87
 -15  -1   8    5.02    0.84
 -15  -1  10   19.45    0.93
 -15   1  15    5.64    0.64
 -14  -1   5   48.11    0.99
 -13  -2   6   12.85    0.79
 -12  -2   4  280.29    1.69
 -12  -1   2   40.70    0.92
 -11  -2  12   22.38    0.83
 -10  -3   5   88.76    0.97
 -10  -3   9   50.89    0.83
  -9  -3   4   35.92    0.68
  -8  -3   9  100.82    0.91
 -17   1  10    1.90    0.75
 -17   3   5   22.24    0.87
 -16   2  15    3.84    0.56
 -16   3   3   11.56    0.79
 -14  -1  12  127.39    1.36
 -13  -2   7   34.40    0.93
 -13  -1  13   85.62    1.21
 -11  -1   1    0.40    0.61
 -10  -3   6   -0.11    0.54
 -10  -2  12  619.09    2.31
  -9  -3   9   54.67    0.77
 -18   3   9   10.37    0.81
 -18   3  12    8.07    0.63
 -15   0  13  424.53    2.17
 -14   1   2   11.78    0.67
 -13  -2   8    3.84    0.76
 -13  -2   9    5.72    0.77
 -12  -2  11    5.36    0.70
 -18   3  10    0.41    0.68
 -18   3  11    4.72    0.66
 -14  -1   6    2.51    0.75
 -12  -2   5  225.76    1.54
  -9  -3   5   68.37    0.82
  -9  -3   8  410.18    1.73
  -8  -3   8    8.12    0.47
 -17   5   4    3.65    0.63
 -13   1   1    3.28    0.71
 -12  -1  13   86.74    1.15
  -9  -3   6  383.64    1.67
  -9  -3   7   20.56    0.61
 -17   2   8   -0.03    0.74
 -17   2  12    5.79    0.74
 -15   1  14    0.46    0.72
 -15   3   2   66.48    1.00
 -14  -1   7   26.55    0.92
 -14  -1  10    1.29    0.93
 -14   0   4   52.26    0.97
 -13  -1  12  518.86    2.41
 -12  -2   6   73.21    1.03
 -12  -2  10  144.96    1.34
 -11  -2   4   16.34    0.70
 -11  -2  11   41.05    0.86
 -18   5   7    8.43    0.64
 -16   1   7    9.83    0.85
 -16   2   5    8.25    0.77
 -16   4   3   12.70    0.76
 -15   0   7    1.10    0.80
 -14  -1   8    5.19    0.81
 -14  -1   9   74.84    1.19
 -12  -2   7   17.55    0.78
 -12  -2   9  192.41    1.49
 -12  -1   3   58.71    0.92
 -11  -1  13  162.21    1.36
 -10  -2   3    1.71    0.52
 -10  -2  11   35.35    0.81
 -18   4   9    4.10    0.66
 -18   4  10   19.33    0.79
 -18   4  11    3.80    0.66
 -17   2  10    2.30    0.75
 -16   1  11    1.46    0.91
 -16   3   4   65.12    1.03
 -15   2  15   20.08    0.75
 -15   3  16    5.36    0.56
 -13  -1   5   27.85    0.83
 -12  -2   8   21.55    0.81
 -11  -1   2    4.93    0.59
  -9  -2  11   54.32    0.77
 -18   5   8    0.74    0.66
 -16   1   9    2.69    0.84
 -16   1  10   -0.68    0.80
 -15   0   9    8.08    0.88
 -15   1   5   23.45    0.98
 -14   1   3   22.03    0.78
 -13  -1  11    1.03    0.84
 -13   0   3   29.22    0.79
 -13   1  15   47.58    0.94
 -11  -2   5   40.11    0.81
 -11  -2  10    3.11    0.63
 -15   1  13   39.43    1.01
 -14   2   2   22.09    0.83
 -12  -1  12   47.42    0.94
 -18   5   9   13.63    0.74
 -17   4   6    5.31    0.75
 -17   4  14    3.24    0.50
 -17   5   5   12.67    0.71
 -14   0  12   95.40    1.24
 -14   1  14    0.67    0.74
 -13  -1   6   16.06    0.78
 -12  -1   4   45.68    0.86
 -12   0   2   19.93    0.78
 -10  -2   4  116.35    1.05
 -10  -2  10  107.59    1.07
 -17   3   8    2.52    0.74
 -15   2   4   18.17    0.80
 -13  -1   7   31.56    0.90
 -13  -1  10  120.67    1.32
 -13   1   2    4.78    0.68
 -11  -2   7    4.34    0.63
 -11  -2   8    2.73    0.62
  -9  -2   3  253.61    1.36
 -17   3   9    9.26    0.80
 -17   3  10    0.83    0.71
 -17   3  11    8.18    0.75
 -16   2   7   65.01    1.15
 -16   2  12   55.93    1.11
 -16   3  14    1.17    0.57
 -16   4   4   15.11    0.85
 -15   1   6   44.58    1.03
 -15   2  14    1.58    0.71
 -15   3   3   27.67    0.90
 -14   0   6   19.48    0.85
 -14   2  15   46.28    0.89
 -13  -1   8  168.89    1.46
 -13  -1   9   13.94    0.82
 -11  -1  12  100.89    1.10
 -11   0   1   41.00    0.78
 -17   4   7   14.67    0.82
 -17   6   5   12.96    0.65
 -16   4  15   13.94    0.54
 -15   4  16   10.06    0.53
 -14   1   4   10.99    0.74
 -12  -1   5   65.91    0.95
 -12  -1  11  297.50    1.78
 -10  -2   9   24.27    0.68
 -10  -1   2   28.80    0.74
 -17   5   6    5.14    0.71
 -16   2   8  104.24    1.35
 -16   2  11   15.51    0.87
 -15   3  15   27.64    0.72
 -14   0  10    1.58    0.80
 -11   1   0   44.66    0.81
 -10  -2   6  457.92    1.90
 -10  -1  12  179.03    1.30
  -9  -2   4  136.92    1.04
  -9  -1  12   48.08    0.83
 -17   4   8    0.84    0.83
 -17   4  12    1.56    0.62
 -16   2  10   18.48    0.93
 -16   3   6   18.51    0.98
 -15   1   8    6.13    0.87
 -15   2   5   14.57    0.93
 -14   0   8    2.65    0.80
 -14   1  13   69.50    1.08
 -10  -2   7   51.46    0.82
  -9  -2   9  190.21    1.22
 -16   5   4    4.71    0.78
 -15   1   9    5.06    0.87
 -15   1  10   21.54    0.96
 -14   2   3   23.28    0.78
 -13   0   5   29.64    0.84
 -13   2  15    3.74    0.70
 -11  -1   4   19.71    0.74
 -11  -1  11  135.09    1.23
  -8  -2   9    2.92    0.41
 -17   4   9   79.49    1.17
 -17   4  10   12.06    0.81
 -17   4  11   51.04    0.98
 -17   5   7    0.21    0.74
 -17   5  13    2.96    0.52
 -16   4   5   29.72    0.92
 -13   1   3    0.78    0.60
 -12  -1   7    4.53    0.68
 -12  -1   8   23.67    0.81
 -12  -1   9   35.93    0.88
  -9  -2   5    1.75    0.45
 -16   3   7    2.03    0.81
 -16   3  12    5.20    0.83
 -15   3   4  143.48    1.35
 -15   4   3    1.42    0.69
 -14   1  12  126.45    1.44
 -14   2  14   38.37    0.90
 -11   0  13  131.72    1.23
  -9  -2   6  258.71    1.37
  -9  -2   7   72.45    0.83
 -17   7   6   32.73    0.80
 -15   4  15    3.57    0.58
 -14   3  15   19.11    0.74
 -12   0  12  839.63    2.89
 -11  -1   5  484.62    1.99
 -11  -1  10    3.13    0.63
 -10  -1  11   19.74    0.67
 -16   3  11    9.59    0.81
 -14   1   6    2.42    0.75
 -13   1  13   84.11    1.13
 -12   1   2   38.23    0.77
 -17   5   9   56.89    1.06
 -17   5  11   13.66    0.74
 -16   3   9    6.86    0.87
 -16   4   6   17.27    0.84
 -16   5   5    7.53    0.82
 -15   2   7   81.79    1.24
 -15   2  11   41.47    1.15
 -14   1  11   13.21    0.88
 -14   2   4    9.52    0.73
 -13   0   7    4.01    0.73
 -11  -1   6   18.91    0.67
 -11   1  14   82.82    1.09
  -9  -1  11    2.60    0.50
  -8  -1  11  259.28    1.35
 -16   5  14    3.88    0.55
 -16   7   4    1.20    0.65
 -15   3   5    7.37    0.77
 -15   5   3   12.99    0.82
 -14   1   7   27.58    0.94
 -12   2   1    1.62    0.62
 -11  -1   7    9.11    0.63
 -11  -1   8   41.77    0.83
 -11   1   1    2.38    0.51
 -10  -1   4  164.10    1.18
 -17   7   7    4.90    0.65
 -15   2   9   17.90    0.96
 -15   2  10   22.80    0.98
 -15   3  13    3.60    0.68
 -15   4   4    9.40    0.84
 -14   5  16    8.23    0.62
 -13   2  14  100.85    1.16
 -10   1   0   22.80    0.63
 -17   6  10    1.97    0.73
 -17   6  11    6.98    0.65
 -16   4  12   15.03    0.75
 -15   4  14    0.16    0.64
 -15   5  15    1.14    0.55
 -13   1  12  507.30    2.34
 -13   3  15    0.22    0.68
 -12   1  13   82.50    1.14
 -16   4   8   71.19    1.20
 -16   4  11    9.89    0.78
 -16   5   6   11.61    0.81
 -16   6   5    4.28    0.72
 -14   4  15   20.95    0.73
 -13   1   5   29.60    0.84
 -10  -1   9   81.63    0.94
  -9  -1  10  119.72    1.03
 -16   4  10   14.22    0.86
 -15   3  12    6.11    0.77
 -15   6   3   39.72    0.93
 -12   0   6   18.93    0.73
 -10   0   2  399.03    1.70
 -10   0  12  338.46    1.72
 -17   7   9    3.54    0.62
 -17   7  10   38.77    0.83
 -15   3   7   25.65    1.10
 -15   4   5   29.84    1.02
 -14   2   6   31.33    1.05
 -12   0   8  110.47    1.26
 -12   2  14   95.46    1.16
 -11   0  11  156.13    1.31
 -10  -1   6   45.75    0.75
 -10  -1   7    6.80    0.56
 -10  -1   8  104.93    1.02
  -8  -1  10  205.70    1.19
 -16   7   5   10.11    0.74
 -15   3  11   36.70    1.01
 -15   4  13    3.03    0.76
 -15   5   4   20.78    0.87
 -15   6  15   11.05    0.54
 -14   2  11    0.15    0.83
 -13   2  13    2.43    0.71
 -11   1  13  159.54    1.32
 -16   6   6   15.82    0.86
 -15   3   8  143.38    1.53
 -15   3   9   12.46    0.94
 -15   3  10   27.48    1.01
 -15   5  14    1.69    0.62
 -15   7   3   10.28    0.78
 -14   2   7   38.16    1.14
 -14   3  13    4.03    0.81
 -14   4   3    0.41    0.64
 -13   1   7   34.21    0.93
 -13   1  10  130.17    1.37
 -12   1  12   46.44    0.95
 -11   1   2    5.45    0.52
 -16   5   8   14.59    0.88
 -14   2   8   35.06    1.15
 -14   2  10   73.13    1.22
 -14   5  15   11.54    0.70
 -13   1   8  170.15    1.50
 -13   1   9   14.72    0.86
 -13   2   4  227.25    1.56
 -13   3  14  132.19    1.29
 -12   3   1    7.73    0.65
 -16   5  10    8.57    0.80
 -15   4  12    4.72    0.86
 -14   2   9   43.99    1.09
 -14   4  14   35.70    0.83
 -11   0   5  413.81    1.83
 -11   2  14   30.14    0.87
 -10   1   1   86.19    0.87
 -10   1  13  146.51    1.27
 -15   5   5    0.34    0.89
 -14   6   2    0.85    0.71
 -13   2  12    7.11    0.78
 -12   1  11  296.13    1.86
 -11   0   9  162.39    1.31
  -9  -1   6   26.10    0.62
  -9  -1   7  115.62    0.98
 -16   6   8   10.63    0.93
 -15   4  11  140.37    1.53
 -13   2   5    4.99    0.85
 -13   3   3    0.90    0.64
 -12   1   5   65.99    0.96
 -12   2  13   40.63    0.89
 -11   1  12  107.11    1.21
 -16   6  10   24.16    0.86
 -16   7   7   13.62    0.88
 -16   9   6    7.65    0.67
 -15   4   8   18.54    1.12
 -10   2   0    4.60    0.50
  -9   0  11  149.97    1.14
 -15   4  10    3.47    0.87
 -15   7   4    0.22    0.76
 -14   3  11  125.44    1.42
 -14   4  13    4.77    0.79
 -14   6  15   35.46    0.76
 -13   3  13   28.42    0.96
 -12   2   3  184.54    1.33
 -12   3  14   49.71    0.98
 -12   4  15    4.28    0.71
 -10   0   4  275.59    1.43
 -16   7  11   13.10    0.79
 -16   8   7    2.19    0.76
 -16   8  12    1.90    0.61
 -15   7  14   12.84    0.64
 -14   3   7  192.62    1.67
 -14   5  14    7.40    0.66
 -13   2   6   13.29    0.81
 -13   5  15    0.92    0.64
 -12   1   9   37.89    0.92
 -16   7   9   41.70    0.99
 -16   7  10    3.52    0.73
 -16   9   7   10.60    0.75
 -15   8   4    0.53    0.76
 -14   3   8  112.44    1.42
 -14   3   9   57.48    1.30
 -14   3  10   57.29    1.17
 -13   2  10   46.07    1.05
 -13   3   4  113.42    1.29
 -13   4  14   10.30    0.72
 -12   1   7    5.33    0.70
 -12   1   8   25.79    0.85
 -11   1  11  139.19    1.33
 -10   1   2   26.93    0.60
 -10   1  12  187.32    1.38
 -16   8  11    0.14    0.65
 -15   5   7    0.09    0.85
 -15   5  11   42.87    1.01
 -15   9   4    7.37    0.70
 -14   4   5    5.03    0.79
 -14   7  15    1.98    0.60
 -13   2   7   36.18    0.97
 -13   2   8    3.89    0.81
 -13   2   9    5.31    0.84
 -12   2  12   25.10    0.84
 -11   1   4   19.78    0.65
 -11   2  13  127.96    1.22
 -16   8  10    6.79    0.68
 -15   5  10   33.29    1.14
 -14   5   4   22.73    1.00
 -14   6   3    1.21    0.74
 -13   3  12    2.00    0.87
 -10   0   6  125.37    1.05
 -16   9   9    6.84    0.63
 -15   6  12    0.68    0.64
 -14   6  14    1.23    0.65
 -13   4   3  101.23    1.15
 -11   3  14   95.68    1.10
  -9   1  12   51.22    0.87
 -14   4   6   61.22    1.16
 -14   4  11    1.77    0.81
 -12   2  11    6.35    0.76
 -12   3  13  149.74    1.34
 -11   1   5  493.29    2.00
 -10   2  13    1.55    0.70
  -8   0  10  468.09    1.78
 -15   8   5   17.63    0.85
 -14   4   7   11.59    1.07
 -14   7   3   17.64    0.89
 -13   4  13   42.33    0.92
 -13   5  14   14.85    0.80
 -12   2   5  239.21    1.56
 -12   4  14   53.53    1.00
 -12   5  15   19.01    0.73
 -10   2   1   20.77    0.56
 -15   6   8    0.63    0.99
 -15   7   6    5.44    0.80
 -15   9   5   -0.47    0.72
 -15  10   5    1.98    0.65
 -14   5   5   16.93    0.89
 -11   1   6   19.80    0.70
 -11   1   9  115.17    1.17
 -11   2  12   24.04    0.80
 -15   6  10   33.26    0.99
 -14   4   9    1.04    0.89
 -14   6   4    2.30    0.76
 -14   7  14    0.86    0.61
 -13   3  10  270.39    1.88
 -13   4   4   -0.64    0.70
 -12   2  10  160.04    1.45
 -11   1   7    9.83    0.66
 -11   1   8   39.28    0.84
 -11   2   3   11.52    0.59
 -10   3   0    0.00    0.51
 -15   7  11    6.29    0.83
 -15   8   6    0.38    0.86
 -14   6  13    1.67    0.62
 -14   8   3    2.35    0.72
 -13   3   7   63.46    1.14
 -13   3   9   23.17    0.97
 -13   7  15    3.78    0.64
 -12   2   9  219.38    1.63
 -12   3  12   32.26    0.99
 -12   5   1    4.49    0.62
 -15   8  12    0.23    0.61
 -14   5  11   47.30    1.16
 -14   8  14    7.11    0.65
 -14   9   3   15.40    0.80
 -13   3   8  121.03    1.40
 -13   4  12   14.60    0.82
 -13   5   3  123.35    1.26
 -12   2   7   19.83    0.82
 -11   3  13   21.37    0.83
 -10   1   4  164.39    1.13
  -9   1  11    2.88    0.59
 -15   7   9    3.18    0.80
 -15   7  10   13.95    0.83
 -15   9   6    3.40    0.76
 -15  10   6   25.43    0.78
 -13   8  15   42.50    0.88
 -12   6  15   14.54    0.72
 -11   4  14    6.36    0.76
 -15   8  11    7.58    0.71
 -14   9  14   -0.18    0.57
 -12   4  13    6.43    0.70
 -12   5  14   11.40    0.78
 -11   2   4   15.87    0.65
 -11   3   2   32.21    0.70
 -10   2   2   58.87    0.75
 -10   2  12  634.46    2.35
 -15   8   8    3.78    0.76
 -15   8   9   13.90    0.94
 -15   8  10    0.68    0.70
 -15   9   7   -0.08    0.74
 -15   9  11    1.74    0.64
 -14   5   9  257.48    1.93
 -13   4  11    5.17    0.82
 -13   7   2    8.16    0.74
 -11   4   1   71.37    0.91
 -15   9   8    1.78    0.81
 -14   8   4   41.20    0.99
 -13   4   6    8.92    0.85
 -13   5   4   36.31    0.93
 -13   6   3    2.72    0.80
 -12   3   5    4.77    0.70
 -12   4   3    6.41    0.75
 -10   1   6   45.68    0.75
  -8   1  11  276.32    1.42
 -15   9   9    7.63    0.78
 -15  10   9   19.96    0.74
 -15  10  10    6.18    0.65
 -14   6  11   16.07    0.85
 -14   7   5    5.14    0.81
 -14  11   4    7.21    0.65
 -13   4  10    0.11    0.82
 -13   7  14    1.98    0.63
 -13   8   2    1.09    0.76
 -12   7  15  101.17    1.13
 -11   2   5   39.35    0.78
 -11   3  12   12.09    0.84
 -10   1   7    6.90    0.57
 -10   3  13   38.14    0.84
  -9   1  10  125.81    1.06
 -14   6   7    2.83    0.89
 -14   7  12    5.39    0.67
 -14  10   4    8.87    0.71
 -13   4   7    3.33    0.85
 -13   4   9    2.06    0.86
 -12   4  12   15.61    0.89
 -11   2   9    8.11    0.70
 -11   6  15   41.36    0.94
 -10   3   1   23.40    0.57
  -9   2  12  240.88    1.43
 -14   6   8   12.17    0.95
 -14   6   9    3.94    0.89
 -13   9   2   18.55    0.84
 -11   2   8    3.76    0.66
 -11   3   3   15.47    0.62
 -10   4   0   14.73    0.59
 -14   7  11   13.96    0.79
 -14   8   5   10.20    0.84
 -14   8  12   39.52    0.84
 -13   5  11   10.63    0.83
 -13   7   3    2.73    0.79
 -13   8  14   -0.23    0.63
 -12   3   7   45.06    0.98
 -12   3   8   28.62    0.92
 -12   7   1   86.85    1.11
 -12   8  15    0.51    0.64
 -11   2   7    3.96    0.64
 -11   4  13   87.01    1.05
 -11   5  14    6.12    0.76
 -14   9   5   12.77    0.91
 -14  11   5    1.22    0.68
 -13   9  14    2.73    0.67
 -12   9  15   26.29    0.86
  -9   3  13  102.18    1.08
  -8   1  10  211.65    1.25
  -8   2  12   37.96    0.75
 -14   7   7    3.41    0.87
 -14   7  10   11.14    0.84
 -14  10   5    1.47    0.72
 -13   5  10   77.99    1.22
 -11   4   2    6.43    0.57
 -11   7  15   11.41    0.80
 -14   7   9   11.44    0.90
 -14   8  11    0.47    0.66
 -13   8   3    1.90    0.82
 -12   5   3   73.14    1.03
 -12   7  14    6.73    0.75
 -11   5   1  160.03    1.21
 -10   2   4  115.04    0.98
  -9   1   5    5.93    0.47
 -14   8   7   31.42    1.14
 -14   8  10   27.31    1.00
 -14   9   6    1.02    0.77
 -14   9  11    2.42    0.75
 -13   5   8  102.66    1.37
 -13   5   9   37.76    1.05
 -13   8  13    7.78    0.73
 -12   4   5   27.56    0.86
 -12   4  10   20.92    0.99
 -10   3   2    1.52    0.53
  -9   1   6   25.54    0.59
  -9   1   7  113.91    0.95
 -14   8   8   44.45    1.07
 -14   8   9   60.70    1.12
 -14  10   6   45.06    1.01
 -14  10  11    0.81    0.64
 -13   7   4   18.63    0.88
 -13   9   3   13.93    0.87
 -12   6  13   10.80    0.68
 -11   4  12   13.21    0.72
 -11   6  14   36.43    0.90
 -11   8  15   19.59    0.87
 -10   4  13    2.74    0.69
 -10   5  14    0.82    0.68
 -14   9  10   -0.13    0.67
 -14  11   7   14.37    0.77
 -13   9  13    3.29    0.70
 -13  10   3   68.22    1.05
 -12   4   6    2.85    0.74
 -12   4   9    1.10    0.78
 -11   3   5   39.61    0.81
  -8   1   9  354.54    1.52
 -14   9   8  107.32    1.31
 -14   9   9    3.32    0.74
 -14  10  10   31.85    0.85
 -14  11   8    3.28    0.66
 -14  11   9    6.94    0.66
 -12   4   7    1.17    0.76
 -12   5   4    2.07    0.70
 -12   7   2  148.90    1.37
 -11   3   6  149.74    1.27
 -11   3   9   61.35    0.99
 -11   4   3  155.45    1.22
 -11   9  15    7.51    0.79
 -10   2   6  456.48    1.86
 -10   2   7   53.04    0.82
 -10   2   8  274.55    1.54
 -10   4   1    3.70    0.46
 -14  10   8    7.62    0.78
 -13   6   7    2.33    0.87
 -13   6   9   90.56    1.30
 -13   8   4   13.91    0.85
 -12   6   3   36.13    0.89
 -12   9  14    0.30    0.70
 -11   3   8   63.23    0.99
 -11  10  15   41.12    0.93
 -10   3  11  197.25    1.39
  -9   2  10  167.41    1.20
  -9   3  12  231.63    1.41
  -8   2  11  195.81    1.24
 -13   7  11    0.68    0.71
 -13  12   4    5.46    0.63
 -12   6  12    1.51    0.77
 -12  10  14   15.26    0.79
 -11   4  11   20.40    0.79
 -11   5   2   77.75    0.96
 -10   3   3    3.81    0.49
  -9   3   1  128.13    0.95
 -13   9   4   61.91    1.12
 -13   9  12    9.56    0.68
 -13  10   4   14.81    0.92
 -13  11   4    3.64    0.77
 -12   5  10   96.76    1.31
 -12   8   2   38.81    1.00
  -9   4  13  435.80    1.93
 -13   7  10   23.75    0.92
 -13  11  12    5.29    0.62
 -11   5  12    4.00    0.75
 -10   3  10   50.45    0.95
 -10   6  14   26.32    0.78
 -13   7   7   25.34    1.01
 -13   7   8   78.26    1.27
 -13   7   9    2.97    0.84
 -13  12   5    1.63    0.67
 -12   5   6   11.80    0.83
 -12   5   9    2.89    0.81
 -12   6   4   14.24    0.81
 -12   7   3   17.06    0.92
 -12   9   2   73.87    1.16
 -11   4  10   34.07    0.89
 -11   6  13   15.21    0.70
  -9   2   9  191.08    1.24
  -7   2  11  161.75    1.08
 -13   8  10   -0.18    0.88
 -13   9   5    3.64    0.79
 -13   9  11    3.07    0.69
 -12   5   7   90.46    1.24
 -12   5   8   30.12    0.97
 -12  10   2   70.48    1.10
 -11   8  14   21.96    0.81
 -10   3   4   17.98    0.59
 -10   4   2  143.90    1.09
  -8   3  12  353.81    1.63
 -13  10  11   86.60    1.13
 -13  11  11    1.14    0.67
 -11   4   5   93.65    1.09
 -11   4   9  114.59    1.23
 -10   3   9   53.97    0.88
  -9   2   8    4.86    0.51
  -9   3  11   35.66    0.74
  -8   2  10   28.82    0.61
 -13   8   7   10.47    0.91
 -13   8   8   24.63    0.99
 -13   8   9   13.76    0.88
 -13   9  10    1.33    0.72
 -13  12  10    5.35    0.65
 -12   6  10    7.24    0.93
 -12  10  13    1.24    0.70
 -11   4   8    1.30    0.83
 -11   6   2   35.86    0.81
 -10   5   1  337.38    1.58
  -9   2   5    2.09    0.44
  -9   2   6  263.91    1.37
  -9   2   7   71.75    0.82
 -13  10   6   17.63    0.88
 -13  10  10   12.99    0.76
 -13  11   6   50.87    1.03
 -13  11  10    3.26    0.71
 -13  12   8   -0.22    0.71
 -12   8   3   48.38    1.00
 -11  11  14   49.30    0.94
 -10   4  11   -0.04    0.59
 -13   9   7    6.45    0.86
 -13   9   8    9.84    0.87
 -13   9   9   22.69    0.91
 -13  10   7   18.97    1.01
 -13  10   9   28.36    1.00
 -13  11   9    0.26    0.80
 -12   6   6   25.77    0.95
 -12   6   9   26.26    0.95
 -12  12   3   -0.38    0.69
 -11   8   1   41.32    0.94
 -10   3   6    0.42    0.53
 -10   3   7   20.75    0.68
  -9   4  12    4.45    0.55
  -9   5  13    7.51    0.70
 -13  10   8   11.64    0.84
 -12   6   7   13.11    0.90
 -12   6   8  105.68    1.33
 -12   9   3   28.91    0.90
 -12  12  12    0.33    0.65
 -10   5  12    3.46    0.61
  -9   3  10  121.62    1.06
  -8   2   9    2.93    0.45
 -18  -1   5    6.30    0.59
 -18  -1   7   32.91    0.83
 -18   0  10   11.23    0.69
 -17  -2   5   20.60    0.77
 -17  -2   6    0.79    0.71
 -17   2  13   38.81    0.82
 -12  -3   9   10.39    0.79
 -11  -3   9   60.38    0.96
 -17  -2   4    2.00    0.62
 -16  -2   9    0.48    0.75
 -16   0  12    4.76    0.67
 -15  -2  10   22.46    0.90
 -14   2  14   47.72    1.04
 -13  -3   9   21.36    0.89
 -11  -4   7   10.22    0.68
  -9  -1  11    2.29    0.62
  -8  -3   8    9.17    0.56
 -17  -1  10    1.64    0.65
 -16  -3   5    0.32    0.76
 -16   1  13   46.44    0.89
 -15  -3   8  140.72    1.38
 -15   2  14    1.97    0.81
 -14  -4   4    7.35    0.69
 -14  -4   5    4.33    0.80
 -13  -1  12  542.40    2.36
 -12  -4   7    0.56    0.70
 -10  -4   7    0.64    0.56
 -10  -3   9   53.53    0.86
  -9  -2  10  165.10    1.17
  -8  -4   6    1.65    0.44
 -17  -2   3    9.10    0.60
 -17  -2   8   -0.59    0.66
 -16  -3   4   65.04    0.96
 -16  -3   6   18.89    0.79
 -14  -3   9   55.73    1.07
 -13  -4   7    3.71    0.75
 -13  -2  11   57.92    1.05
 -13   0  13   58.66    1.11
 -18  -1   9    3.89    0.65
 -18   1  12    0.87    0.47
 -17   3  14   18.49    0.70
 -16  -3   3   11.73    0.69
 -14  -2  11   -0.50    0.76
 -10  -5   2  145.69    1.08
  -9  -5   2   28.88    0.62
  -9  -4   7   12.70    0.56
 -17   1  13    6.58    0.62
 -16   2  14    6.06    0.69
 -15  -3   9   13.55    0.86
 -15  -1  12   12.70    0.80
 -12  -4   8   30.90    0.88
 -11  -5   3   20.16    0.66
 -10  -5   4  178.73    1.19
  -9  -5   1  168.33    1.08
  -9  -5   3   53.16    0.71
  -9  -3   9   59.98    0.81
  -7   0  11   45.78    0.65
 -17  -2   9   20.71    0.79
 -17  -1  11    8.87    0.65
 -16  -3   8   55.47    1.02
 -15  -2  11   40.10    0.97
 -14  -4   7   10.95    0.82
 -14   1  14    1.41    0.81
 -13  -4   8   24.23    0.89
 -13  -3  10  270.38    1.76
 -13   1  14   57.11    1.08
 -12  -3  10    1.42    0.75
 -11  -5   2   79.41    0.88
 -11  -5   4   10.88    0.61
 -11  -3  10   12.46    0.74
 -10  -5   1  357.77    1.53
  -9  -5   4    6.50    0.49
 -18  -1  10   -0.33    0.60
 -16  -1  12    1.12    0.65
 -15  -4   4   10.16    0.78
 -15  -4   5   28.25    0.82
 -14  -3  10   57.34    1.07
 -12  -5   3   72.95    0.98
 -12  -5   4    1.29    0.62
 -11  -5   1  174.11    1.21
  -8  -5   3   69.60    0.72
  -8  -4   7    1.81    0.44
  -8  -2  10   31.09    0.61
  -8  -1  11  263.52    1.33
 -18  -2   5   15.55    0.65
 -18  -2   6   12.19    0.63
 -18  -2   7   13.34    0.70
 -17   2  14    6.51    0.61
 -15  -4   3    0.60    0.68
 -14  -4   8  103.33    1.24
 -12  -5   2   55.71    0.89
 -12  -5   5   19.08    0.75
 -12   1  14    3.97    0.76
 -10  -3  10   52.66    0.95
 -18   0  12   16.55    0.62
 -17  -3   5   23.83    0.78
 -17  -3   6    1.83    0.68
 -17  -2  10    3.02    0.65
 -16  -2  11   14.61    0.78
 -16   1  14   -0.02    0.70
 -15  -3  10   27.97    0.92
 -11  -5   6   94.05    1.03
  -9  -5   5   78.09    0.83
 -18  -2   4    8.81    0.52
 -17  -3   4   22.78    0.70
 -17  -3   7    3.99    0.69
 -14  -2  12   52.89    1.03
 -13  -5   3  125.02    1.21
 -13  -5   4   37.56    0.84
 -13  -5   5    3.49    0.68
 -13  -1  13   95.15    1.18
 -12  -4   9    0.37    0.74
 -12  -2  12   27.05    0.98
 -10  -5   6   10.16    0.61
  -8   0  12   75.15    0.83
 -18  -2   9   20.20    0.76
 -15  -4   8   18.39    0.85
 -15  -1  13   43.98    1.03
 -13  -3  11    0.96    0.90
  -9  -2  11   57.98    0.81
  -8  -5   5  141.15    0.98
 -16  -4   5   30.96    0.85
 -16  -4   6   16.64    0.84
 -16  -3  10    1.89    0.85
 -15  -2  12   36.24    0.92
 -14  -4   9    0.82    0.78
 -14   0  14    6.03    0.79
 -13  -5   2   77.93    1.00
 -12  -5   7   90.38    1.18
 -12  -3  11   37.05    0.94
 -11  -5   7   11.49    0.70
 -10  -4   9    6.64    0.64
  -9  -5   6   41.33    0.71
 -17  -3   9    8.28    0.80
 -17   1  14    1.47    0.54
 -16  -4   4   14.07    0.70
 -16  -4   7   25.88    0.92
 -14  -5   5   13.74    0.85
 -10  -5   7  210.48    1.34
  -8  -4   8   52.14    0.71
  -7  -4   7    5.06    0.44
 -18  -2  10    1.94    0.58
 -16  -2  12   57.17    0.95
 -16   2  15    3.98    0.65
 -15  -4   9   67.00    1.09
 -15  -3  11   37.68    0.95
 -14  -5   6    2.31    0.70
 -13  -5   7  213.65    1.56
 -12   0  14   37.05    0.89
  -7  -2  10    2.21    0.40
 -18  -1  12    1.01    0.54
 -16   0  14   27.76    0.81
 -14  -5   3   26.49    0.75
 -13  -4  10    0.78    0.78
 -12  -4  10   20.31    0.86
 -10  -2  12  636.96    2.31
  -9  -4   9  120.23    1.04
  -8  -5   6   35.47    0.63
  -7  -3   9  236.99    1.20
  -7  -1  11   19.76    0.52
 -18  -3   7    1.01    0.61
 -14  -4  10  116.82    1.30
 -14   1  15   30.59    0.89
 -12  -5   8   27.14    0.86
 -11  -5   8   40.47    0.87
  -9  -5   7    1.10    0.52
  -8  -2  11  206.42    1.24
 -18  -3   5   10.86    0.56
 -18  -3   8   12.09    0.68
 -17  -3  10    1.63    0.63
 -16  -3  11    9.67    0.74
 -14  -2  13    3.48    0.74
 -13  -2  13    4.47    0.74
 -10  -1  13  149.50    1.25
  -8  -3  10   23.47    0.60
 -18  -2  11    2.69    0.57
 -17  -4   6    5.35    0.66
 -17  -2  12    5.46    0.64
 -16  -4   9    0.05    0.70
 -15  -5   4   21.49    0.78
 -15  -5   5    0.43    0.64
 -15  -5   6   15.03    0.75
 -14  -5   8   19.84    0.86
 -14  -3  12  115.73    1.28
 -14  -1  14    0.84    0.82
 -13  -3  12    1.52    0.78
 -11  -6   4    2.48    0.69
 -10  -6   3  107.00    0.97
 -10  -6   4   34.01    0.76
 -10  -5   8   32.81    0.77
 -10  -4  10   73.90    0.97
  -8  -1  12    4.32    0.57
 -18  -3   9   10.45    0.64
 -17  -4   5    4.25    0.64
 -15  -5   7    0.40    0.69
 -15  -3  12    6.63    0.75
 -15  -1  14    0.09    0.72
 -13  -1  14   58.52    1.00
 -11  -6   5  127.79    1.13
 -10  -6   2    3.56    0.49
  -9  -6   2  225.69    1.24
  -8  -5   7  246.04    1.29
  -7  -4   8  297.02    1.33
 -17  -3  11    7.24    0.74
 -16  -2  13   -0.66    0.61
 -16  -1  14    0.12    0.69
 -13  -4  11    6.05    0.81
 -12  -6   3   35.10    0.83
 -12  -6   4   15.69    0.69
 -12  -6   5   47.10    0.87
 -12  -1  14    4.57    0.78
 -11  -6   2   35.37    0.73
 -11  -5   9    1.43    0.82
 -11  -3  12   11.86    0.87
  -9  -6   4   38.52    0.67
  -9  -5   8   11.22    0.60
  -9  -3  11   37.64    0.74
  -8  -4   9   11.04    0.54
  -7  -5   6   18.56    0.52
 -18  -1  13   20.23    0.57
 -16  -4  10   14.59    0.78
 -16  -3  12    5.13    0.79
 -15  -5   8   81.67    1.12
 -14  -5   9  253.57    1.70
 -12  -4  11    5.30    0.78
  -8  -6   3   29.30    0.64
 -18  -2  12    5.68    0.56
 -17  -4   9   79.78    1.04
 -15  -4  11  146.30    1.37
 -13  -6   4   14.99    0.69
 -13  -6   5   10.36    0.72
 -12  -6   2   69.32    0.89
 -10  -6   6  334.52    1.63
 -10  -5   9   13.72    0.81
  -9  -4  10    0.87    0.57
  -8  -6   4   24.16    0.62
 -17  -2  13   38.44    0.78
 -17  -1  14    1.48    0.56
 -16  -5   5    7.72    0.64
 -16  -5   7   15.37    0.73
 -15  -5   9   14.72    0.94
 -13  -6   3    2.63    0.70
 -13  -6   6   28.37    0.85
 -13   0  15  179.55    1.38
 -12  -6   7   13.00    0.89
  -9  -1  13   18.48    0.65
  -8  -6   1  146.31    0.96
 -13  -5  10   76.95    1.16
 -11  -6   7  435.72    1.94
  -9  -6   6  161.18    1.15
  -7  -3  10   96.77    0.84
  -7  -2  11  169.04    1.04
 -18  -4   7   -0.22    0.56
 -18  -3  11    3.44    0.59
 -17  -3  12   80.59    1.00
 -15  -3  13    3.89    0.74
 -15  -2  14    0.55    0.75
 -14  -6   4    1.92    0.72
 -14  -6   6    1.94    0.68
 -14  -5  10   16.28    0.87
 -14  -2  14   46.53    0.95
 -13  -3  13   33.28    0.92
 -13  -2  14  111.81    1.30
 -10  -6   7  166.08    1.25
 -10  -2  13    0.83    0.60
  -8  -6   5    6.14    0.50
  -8  -5   8   68.57    0.81
  -7  -5   7  101.85    0.85
 -18  -4   6    0.70    0.50
 -18  -4   8   22.90    0.68
 -14  -6   7    3.46    0.83
 -14  -4  12    4.59    0.78
 -13  -4  12   14.68    0.86
 -12  -6   8  103.70    1.18
 -11  -5  10   39.61    0.91
  -9  -5   9   -0.08    0.57
  -8  -3  11   36.90    0.69
  -8  -2  12   39.42    0.72
 -18  -2  13    5.10    0.48
 -16  -5   9   44.23    0.90
 -16  -3  13   11.04    0.67
 -15  -4  12    5.00    0.75
 -15  -1  15    6.60    0.75
 -14  -6   3    0.61    0.69
 -14  -1  15   30.27    0.94
 -13  -6   8   27.14    0.89
 -11  -6   8   61.33    0.98
  -9  -6   7  404.25    1.73
  -7  -1  12  145.26    1.02
 -17  -5   7    0.24    0.63
 -16  -1  15    8.43    0.68
 -14  -6   8   12.09    0.81
 -10  -5  10    8.28    0.70
  -9  -3  12  256.01    1.49
  -8  -6   6  318.38    1.46
 -18  -3  12    8.56    0.57
 -17  -5   8    1.97    0.65
 -16  -4  12   15.00    0.73
 -15  -6   5   31.85    0.79
 -15  -6   6   22.73    0.78
 -15  -6   7   15.34    0.85
 -13  -5  11   11.10    0.86
 -10  -6   8  134.72    1.19
  -9  -4  11    9.29    0.64
  -7  -6   5   12.94    0.50
 -18  -4  10   18.81    0.66
 -17  -5   5   12.86    0.56
 -17  -3  13    0.90    0.58
 -16  -5  10   10.23    0.73
 -15  -6   4   57.80    0.91
 -12  -6   9   28.13    0.90
 -12  -5  11   35.66    0.95
  -9  -2  13    4.49    0.65
  -8  -5   9  126.12    1.04
  -7  -5   8   85.37    0.83
 -17  -1  15    0.95    0.51
 -14  -6   9    3.68    0.77
 -11  -7   4  299.52    1.61
 -11  -6   9    9.39    0.76
 -11  -5  11   42.76    0.94
  -9  -6   8    4.98    0.61
  -8  -6   7   36.54    0.69
 -17  -4  12    2.30    0.65
 -16   0  16   38.61    0.80
 -14  -4  13    4.59    0.76
 -14  -3  14   23.17    0.82
 -13  -3  14  158.31    1.46
 -12  -7   4   21.88    0.78
 -12  -7   5   69.45    0.97
 -11  -7   3   77.06    0.91
 -11  -7   5  110.03    1.09
 -10  -7   3   78.22    0.88
 -10  -7   4  160.59    1.19
 -10  -4  12   85.28    1.13
 -10  -3  13   39.96    0.91
  -9  -5  10    2.85    0.62
  -6  -5   7   57.78    0.68
 -18  -4  11    3.88    0.56
 -16  -6   7   60.82    0.97
 -16  -5  11   46.33    0.90
 -15  -6   9  114.68    1.22
 -15  -4  13    2.45    0.69
 -14  -2  15   62.06    1.05
 -12  -7   6    3.58    0.70
 -10  -7   2  120.73    1.07
 -10  -6   9    1.57    0.67
  -9  -7   3   48.79    0.74
  -9  -7   4   83.95    0.89
  -7  -6   6    0.25    0.44
  -7  -3  11   22.59    0.57
  -6  -3  10    3.13    0.41
 -16  -6   5    5.36    0.64
 -16  -6   8   11.03    0.77
 -16  -2  15    4.43    0.65
 -14  -6  10    3.83    0.79
 -14  -5  12   15.53    0.96
 -13  -7   4   17.88    0.81
 -13  -7   5    9.21    0.70
 -13  -7   6    1.77    0.67
 -13  -6  10    8.56    0.83
 -13  -2  15    5.17    0.82
 -12  -6  10    6.44    0.80
 -11  -7   2  100.81    0.98
 -10  -5  11    2.30    0.68
  -9  -7   2  200.07    1.21
  -7  -4  10   43.46    0.68
 -16  -4  13    3.05    0.64
 -15  -5  12   11.89    0.88
 -12  -5  12    9.96    0.95
 -11  -7   7   -0.43    0.67
 -10  -2  14   69.94    0.96
  -8  -4  11   51.57    0.78
  -8  -3  12  374.99    1.64
 -18  -5   9   14.31    0.65
 -14  -7   5    4.90    0.74
 -13  -7   3    3.11    0.68
 -10  -7   7   13.06    0.71
  -9  -7   1   78.88    0.86
  -9  -6   9  100.06    1.05
  -8  -7   3  158.15    1.06
  -8  -7   4   89.91    0.87
  -8  -6   8  126.58    1.05
 -17  -4  13   16.98    0.68
 -16  -5  12   25.91    0.86
 -16  -1  16   12.42    0.65
 -15  -1  16   11.08    0.65
 -14  -7   4   93.02    1.08
 -14  -7   7    2.83    0.71
 -14  -1  16    0.84    0.67
 -13  -7   8   77.85    1.11
 -12  -7   8    0.72    0.72
 -11  -3  14   96.80    1.18
  -9  -4  12    4.80    0.62
  -8  -5  10    3.52    0.57
  -8  -2  13    1.38    0.60
  -7  -6   7    8.69    0.51
  -7  -5   9  143.51    1.04
 -13  -6  11   89.07    1.20
 -11  -7   8   40.70    0.91
 -10  -6  10   31.92    0.85
  -9  -3  13  111.52    1.05
  -8  -7   1  116.15    0.92
  -6  -5   8   46.81    0.65
 -17  -6   6    5.65    0.56
 -17  -6   7   12.10    0.59
 -17  -6   8    1.71    0.65
 -16  -6  10   24.12    0.76
 -14  -4  14   48.27    0.95
 -12  -6  11    2.26    0.78
 -10  -7   8  244.54    1.52
  -9  -7   7  134.27    1.14
  -6  -6   6    6.77    0.46
 -17  -6   9    8.09    0.65
 -15  -7   5    1.89    0.66
 -15  -7   6    5.09    0.66
 -15  -7   7   60.66    0.97
 -14  -5  13   27.04    0.87
 -14  -3  15   23.15    0.82
 -12  -7   9   93.06    1.17
 -10  -4  13    2.67    0.79
  -8  -7   6    7.88    0.58
  -7  -7   2   92.97    0.83
  -7  -7   3   94.73    0.84
 -16  -3  15   13.69    0.65
 -15  -7   8   12.90    0.72
 -15  -5  13    7.19    0.70
 -14  -7   9   11.05    0.80
 -13  -5  13   15.62    0.86
 -11  -7   9    3.35    0.75
 -11  -6  11   17.45    0.84
  -9  -2  14  108.72    1.07
  -8  -6   9   69.34    0.89
  -7  -6   8    4.94    0.52
 -16  -6  11    3.88    0.69
 -16  -5  13    9.90    0.73
 -15  -2  16   15.84    0.74
 -10  -3  14   16.37    0.71
  -9  -7   8   10.36    0.69
  -7  -7   1   20.52    0.56
  -7  -7   5   46.18    0.69
  -7  -4  11  166.98    1.12
  -6  -4  10    5.38    0.51
 -17  -4  14    3.49    0.52
 -16  -2  16    3.35    0.54
 -14  -6  12   24.47    0.87
 -14  -2  16   48.43    0.88
 -13  -7  10   25.30    0.91
 -13  -6  12    4.08    0.80
 -12  -3  15    6.41    0.83
 -10  -7   9    0.99    0.70
 -10  -6  11    6.64    0.86
  -8  -7   7   85.69    0.94
  -8  -4  12  727.38    2.31
  -7  -3  12  380.35    1.58
  -6  -3  11  779.62    2.10
 -16  -7   6   30.82    0.74
 -16  -7   7   14.96    0.67
 -15  -6  12    0.42    0.67
 -14  -7  10   10.98    0.80
 -13  -2  16    0.62    0.69
 -12  -8   5   17.28    0.82
 -12  -8   6   42.63    0.97
 -12  -7  10   14.18    0.85
 -12  -6  12    2.14    0.78
 -11  -8   4  154.62    1.21
 -11  -8   5   25.56    0.78
 -10  -8   4  263.44    1.52
  -8  -5  11    4.62    0.61
  -6  -6   7  161.06    1.04
 -17  -6  11    6.64    0.64
 -17  -5  13    2.77    0.55
 -16  -7   8    8.90    0.68
 -12  -8   4  101.90    1.07
 -11  -8   3   22.23    0.79
 -11  -8   6   14.80    0.75
 -11  -5  13   11.99    0.78
 -11  -4  14    5.93    0.72
 -10  -8   3   16.45    0.70
 -10  -8   5    7.03    0.65
  -8  -3  13   62.79    0.84
  -7  -7   6  316.61    1.47
 -16  -6  12    6.15    0.68
 -13  -8   5   14.57    0.72
 -13  -8   6    8.77    0.72
 -13  -8   7   10.45    0.85
 -11  -6  12   75.32    1.20
  -9  -5  12   19.19    0.75
  -9  -4  13  493.53    2.00
  -6  -7   3  222.21    1.14
 -15  -4  15    3.81    0.65
 -13  -8   4   13.98    0.71
 -13  -7  11    0.30    0.92
 -13  -5  14   18.85    0.95
 -12  -8   3   47.21    0.82
 -10  -8   2    9.24    0.66
  -9  -8   3    1.79    0.53
  -9  -8   5   43.45    0.81
  -9  -7   9    8.50    0.72
  -8  -7   8    2.65    0.61
  -8  -6  10  164.39    1.23
  -7  -6   9  218.41    1.30
  -5  -5   8   23.19    0.53
 -16  -7  10    3.61    0.70
 -16  -5  14    4.07    0.59
 -14  -8   5    9.31    0.75
 -14  -8   6    5.52    0.71
 -14  -8   7   31.89    0.83
 -14  -7  11   14.58    0.81
 -14  -6  13    1.26    0.84
 -13  -4  15    2.24    0.74
 -12  -8   8   86.44    1.12
 -12  -7  11   68.84    1.10
 -11  -8   8   29.80    0.87
 -10  -8   7   27.37    0.82
 -10  -7  10    0.25    0.73
 -10  -5  13   62.79    1.07
  -9  -8   2   16.06    0.68
  -9  -6  11  118.31    1.17
  -9  -3  14   79.29    1.02
  -7  -7   7   82.78    0.89
  -6  -7   5   75.92    0.78
 -17  -7   7    4.78    0.55
 -17  -7   8    9.83    0.59
 -17  -6  12   11.83    0.62
 -15  -6  13   16.53    0.76
 -14  -8   8   44.63    0.92
 -14  -3  16    2.13    0.67
 -13  -6  13   28.15    0.91
 -10  -4  14   55.93    1.00
  -8  -8   3  122.85    1.06
  -8  -8   4    2.02    0.53
  -6  -6   8   90.64    0.86
 -13  -8   9   14.64    0.82
 -13  -3  16   16.22    0.81
 -12  -8   9   12.14    0.82
 -12  -4  15    4.19    0.82
 -11  -7  11    4.19    0.79
 -10  -8   8  120.43    1.21
  -9  -8   7   49.04    0.88
 -15  -8   6    0.21    0.64
 -14  -8   9   62.21    1.01
 -11  -8   9   31.00    0.90
  -9  -7  10  133.29    1.23
  -8  -8   2   32.16    0.64
  -8  -8   6   95.92    1.07
  -8  -7   9   44.36    0.85
  -7  -5  11    3.83    0.55
  -7  -4  12   75.19    0.87
  -6  -7   6  254.69    1.30
  -6  -4  11  100.84    0.89
 -15  -8   5   17.41    0.71
 -15  -8   8    4.98    0.68
 -14  -7  12    6.35    0.75
 -11  -5  14    5.72    0.87
 -10  -3  15    7.74    0.73
  -8  -5  12    3.55    0.61
  -8  -4  13    7.70    0.70
  -7  -7   8   23.90    0.69
 -15  -7  12   26.71    0.80
 -12  -3  16    0.90    0.72
 -10  -8   9   16.13    0.94
 -10  -7  11  107.57    1.20
  -9  -8   8   93.08    1.09
  -7  -8   3  203.77    1.22
  -7  -8   4  228.79    1.28
  -7  -6  10   23.11    0.70
  -6  -3  12   38.84    0.71
  -5  -4  10    2.52    0.42
 -15  -5  15    0.54    0.61
 -14  -5  15   14.78    0.79
 -12  -8  10   28.75    0.92
 -11  -4  15   29.44    0.86
  -9  -5  13    9.14    0.70
  -8  -8   7    6.80    0.66
  -7  -8   2   17.71    0.59
  -7  -3  13   77.21    0.87
  -6  -6   9    7.39    0.54
  -5  -5   9    0.55    0.42
 -16  -8   7    2.19    0.59
 -16  -8   8   14.96    0.67
 -16  -7  12   16.54    0.70
 -15  -8  10    0.51    0.72
 -15  -6  14    2.29    0.67
 -15  -4  16   12.09    0.63
 -14  -4  16    3.55    0.70
 -13  -5  15    0.38    0.81
 -11  -8  10    2.16    0.78
 -11  -7  12   70.76    1.20
  -9  -4  14    6.33    0.65
  -6  -7   7  110.23    0.95
 -16  -8   6   92.91    0.91
 -16  -8   9    5.16    0.64
 -12  -9   5  123.07    1.21
 -12  -9   6    6.62    0.71
  -8  -7  10    3.29    0.68
  -8  -3  14   13.10    0.66
  -5  -7   5   47.35    0.64
 -14  -8  11    0.15    0.69
 -13  -9   6   17.34    0.83
 -13  -8  11   16.82    0.84
 -12  -9   7   13.39    0.76
 -12  -6  14    2.83    0.87
 -11  -9   4   82.30    0.98
 -10  -9   4   95.36    1.08
 -10  -9   5   66.31    0.96
 -10  -9   6    0.52    0.81
 -10  -8  10   26.84    1.01
 -10  -5  14    0.89    0.69
  -9  -7  11    2.48    0.72
  -8  -8   8   73.08    0.99
  -7  -8   1   23.13    0.59
  -7  -7   9   39.20    0.79
  -5  -6   8   72.30    0.78
 -15  -8  11    7.10    0.77
 -13  -9   5    4.20    0.67
 -13  -9   7    7.51    0.72
 -13  -7  13    4.94    0.77
 -12  -8  11    3.23    0.79
 -16  -7  13   48.37    0.84
 -14  -9   7    3.68    0.74
 -13  -9   8    9.93    0.75
 -11  -9   8   10.57    0.79
 -11  -8  11   32.97    0.94
 -10  -9   3   61.74    0.91
 -10  -4  15    1.41    0.68
  -9  -9   4   31.66    0.77
  -9  -9   5  278.25    1.57
  -7  -8   7   67.24    0.90
  -6  -7   8  204.93    1.26
  -5  -7   6   71.33    0.76
 -14  -9   6    2.41    0.64
 -13  -9   4   59.47    0.88
  -9  -9   3  168.98    1.21
  -8  -6  12    4.83    0.68
  -8  -5  13   79.93    0.98
  -7  -6  11   14.27    0.69
  -6  -8   2  322.23    1.35
  -6  -8   5  305.21    1.45
 -16  -8  11    0.92    0.57
 -14  -9   5   12.48    0.65
 -14  -8  12   46.94    0.91
 -13  -9   9   22.25    0.83
 -12  -9   9   45.86    0.97
 -11  -5  15    4.57    0.75
 -10  -9   8   96.35    1.15
  -9  -9   7   22.88    0.82
  -9  -8  10   77.92    1.09
  -9  -6  13    3.70    0.82
  -8  -8   9    1.86    0.70
  -7  -4  13    6.05    0.58
  -5  -5  10  180.66    1.15
 -15  -9   7   -0.33    0.65
 -15  -5  16    0.57    0.56
 -14  -6  15   45.05    0.87
 -14  -5  16   10.65    0.70
 -11  -9   9    4.66    0.78
 -10  -8  11    0.82    0.77
  -9  -9   2    2.42    0.64
  -9  -5  14    6.53    0.75
  -8  -9   3   23.44    0.75
  -8  -9   4   67.63    0.91
  -8  -9   5   27.39    0.77
  -8  -7  11   72.91    1.02
  -8  -4  14   37.09    0.85
  -7  -8   8   13.37    0.70
  -7  -7  10  139.73    1.19
  -6  -8   1   73.73    0.73
  -5  -7   7  130.15    0.99
  -5  -4  11  430.68    1.62
  -4  -6   7  406.76    1.44
 -15  -9   6    3.15    0.57
 -15  -9   8    2.38    0.61
 -15  -7  14   14.26    0.73
 -13  -6  15   48.06    0.96
 -13  -5  16   12.47    0.73
 -12  -9  10    1.95    0.76
 -11  -4  16    0.11    0.71
 -10  -9   9  185.40    1.47
  -9  -9   8  291.00    1.70
  -8  -9   2   19.04    0.71
  -6  -7   9   24.51    0.71
 -14  -4  17    8.77    0.62
  -9  -4  15  105.94    1.10
  -4  -5   9  184.43    1.03
 -14  -8  13    9.06    0.74
 -13  -8  13    9.36    0.88
 -12  -5  16    2.12    0.78
  -9  -8  11  117.54    1.25
  -8  -8  10  234.15    1.54
  -7  -9   3   38.79    0.80
  -7  -9   4  385.49    1.70
  -7  -8   9   76.72    1.10
  -5  -8   2   58.04    0.67
  -5  -8   3   94.08    0.79
 -15  -8  13   44.90    0.84
 -14  -9  11    2.85    0.71
 -13  -9  11    2.41    0.72
 -13  -4  17   36.96    0.82
 -10  -9  10    1.62    0.79
 -10  -8  12    2.90    0.92
  -9  -9   9  233.77    1.59
  -7  -6  12   37.06    0.81
  -5  -8   5  147.32    1.03
  -5  -7   8   78.06    0.87
  -4  -6   8  368.67    1.46
 -15  -9  11    2.55    0.66
 -12 -10   6    6.40    0.72
 -12 -10   7   72.78    1.11
 -12  -8  13    2.38    0.75
 -11 -10   5   35.95    0.92
 -11 -10   6    6.41    0.73
 -11 -10   7    1.44    0.84
 -11  -7  14   80.40    1.19
  -8  -9   8   57.80    1.01
  -8  -6  13   27.42    0.81
  -7  -9   2  449.66    1.73
  -7  -5  13    6.61    0.63
  -6  -6  11   32.12    0.75
  -6  -5  12   -0.44    0.55
  -4  -7   6    9.43    0.45
 -14  -6  16   15.93    0.72
 -13 -10   6   18.10    0.79
 -13 -10   7   18.35    0.78
 -12 -10   5   12.46    0.73
 -11  -9  11    6.51    0.81
 -10 -10   5   44.28    0.89
  -8  -5  14   48.91    0.93
  -6  -8   8   22.20    0.73
  -6  -7  10    0.49    0.74
  -5  -8   6    3.89    0.52
  -5  -5  11   84.56    0.93
 -13 -10   5   26.14    0.79
 -13 -10   8   11.61    0.72
 -12 -10   4    3.35    0.71
 -11 -10   4    4.19    0.68
 -11  -5  16   15.90    0.81
 -10 -10   4   95.85    1.04
  -9  -7  13   17.97    0.81
  -9  -6  14    0.54    0.69
  -5  -6  10  126.60    1.03
 -14  -9  12    8.39    0.72
 -13  -9  12    9.24    0.73
 -13  -7  15    4.26    0.69
 -13  -6  16    3.85    0.67
 -12 -10   9    7.91    0.75
  -9 -10   4  195.69    1.40
  -9 -10   5   97.27    1.10
  -9 -10   6    3.77    0.72
  -8  -9   9   53.10    0.99
  -8  -8  11   12.76    0.79
  -7  -9   1   68.49    0.82
  -7  -8  10   25.53    0.82
  -7  -4  14   16.79    0.77
  -6  -9   3   72.85    0.83
  -6  -9   4   36.29    0.73
  -6  -4  13   72.92    0.89
 -15  -9  12   15.11    0.67
 -15  -8  14   -0.10    0.56
 -14 -10   6   43.16    0.77
 -14 -10   9    7.07    0.71
 -14  -8  14    8.51    0.67
 -13  -8  14    0.02    0.70
 -12  -9  12   36.83    0.92
 -11 -10   9   12.03    0.81
 -10 -10   3   42.72    0.82
 -10  -9  11   55.87    1.05
 -10  -7  14   52.61    0.97
  -9  -8  12   64.03    1.06
  -9  -5  15   16.71    0.75
  -7  -9   8  270.73    1.60
  -5  -7   9   15.56    0.63
  -5  -4  12    0.27    0.51
  -4  -7   7    2.52    0.45
 -13  -5  17    0.68    0.63
 -11  -9  12   63.85    1.14
 -10  -6  15    2.67    0.73
  -9 -10   3   81.57    1.00
  -6  -9   2    0.25    0.44
  -6  -9   6  281.69    1.53
  -6  -8   9   17.11    0.73
  -5  -8   7    6.56    0.60
  -4  -6   9    6.47    0.55
  -4  -5  10    8.37    0.47
 -15 -10   7   21.42    0.66
 -15 -10   8    7.61    0.59
 -13 -10  10   11.64    0.71
 -12 -10  10   14.80    0.79
 -10 -10   9    0.81    0.77
  -9 -10   8   85.77    1.13
  -8 -10   4   62.97    0.93
  -4  -8   4  270.47    1.22
 -14  -9  13    3.47    0.64
 -13  -9  13    3.77    0.78
  -9  -9  11   26.99    0.92
  -8 -10   3   38.76    0.84
  -8  -9  10    8.41    0.80
  -8  -7  13   52.27    1.03
  -7  -7  12    2.79    0.70
  -7  -6  13  193.48    1.36
  -6  -9   7   36.53    0.83
  -6  -6  12   41.62    0.82
  -4  -4  11    8.18    0.47
 -15 -10  10    6.93    0.63
 -11  -7  15   12.24    0.81
 -10  -9  12   91.25    1.28
  -8 -10   7   18.72    0.83
  -8  -6  14   53.66    0.91
  -7  -9   9   20.64    0.83
  -6  -9   1  146.36    0.96
  -6  -7  11   12.96    0.73
  -5  -8   8   13.62    0.66
  -4  -8   5   15.02    0.51
  -4  -7   8   42.24    0.68
 -13 -10  11   99.31    1.11
 -12 -10  11    0.29    0.70
 -12  -9  13   38.86    0.90
 -12  -5  17   61.63    0.89
 -10 -10  10   21.90    0.89
  -9 -10   9  115.82    1.26
  -9  -7  14   69.83    1.04
  -7 -10   4   17.64    0.83
  -7  -8  11   46.10    0.94
  -7  -5  14    6.07    0.75
  -6  -5  13    5.64    0.69
  -5  -6  11   34.62    0.75
 -13  -7  16    1.40    0.65
  -9  -6  15   20.67    0.88
  -8 -10   2    3.71    0.60
  -8 -10   8   89.36    1.15
  -7 -10   6   34.21    0.88
  -6  -9   8   39.29    0.87
  -5  -9   3    8.98    0.49
  -5  -9   5   19.89    0.64
  -5  -5  12  152.73    1.17
  -4  -8   6   44.36    0.68
 -11 -10  11   15.52    0.83
  -8  -5  15   16.41    0.79
  -7 -10   3    2.72    0.61
  -5  -9   2  228.72    1.16
 -14  -9  14    0.43    0.63
 -13  -6  17   31.13    0.74
 -12 -11   6   10.76    0.78
 -12 -11   7   35.84    0.86
 -12 -11   8    6.35    0.78
 -11 -11   5    1.62    0.77
 -11 -11   6   92.21    1.11
 -10 -11   6   11.25    0.89
 -10  -8  14    9.90    0.78
 -10  -7  15   20.81    0.83
  -9 -10  10   -0.07    0.78
  -9  -9  12    9.34    0.82
  -8  -9  11   34.67    0.94
  -7 -10   7   15.58    0.81
  -7  -9  10  156.83    1.36
  -4  -6  10  151.97    1.06
 -14 -10  12   24.13    0.72
 -13 -11   7    0.63    0.62
 -13 -11   8    4.10    0.70
 -13  -9  14    3.25    0.68
 -12 -11   5   21.98    0.79
 -12 -10  12    7.71    0.72
 -12  -8  15    0.70    0.69
 -12  -7  16   51.90    0.91
 -11 -11   8   44.93    0.93
 -10 -11   5  148.80    1.27
 -10 -11   7   18.84    0.82
  -8 -10   9   57.42    1.05
  -7 -10   2   37.40    0.73
  -5  -8   9   80.38    0.99
  -4  -5  11  267.25    1.34
 -13 -11   6   49.39    0.81
 -13 -11   9    0.06    0.67
 -12  -9  14   -0.51    0.75
 -11 -11   4   34.65    0.87
 -10 -11   4    1.05    0.76
 -10  -6  16    2.45    0.72
  -9 -11   5   16.96    0.90
  -7 -10   8   13.45    0.83
  -7  -7  13    7.96    0.86
  -6 -10   4  299.61    1.63
  -6  -9   9   31.81    0.87
  -5  -9   1  397.80    1.43
  -5  -9   7   14.53    0.71
  -3  -7   7   37.55    0.59
 -14 -11   7   15.70    0.64
 -12  -6  17    1.28    0.62
 -11 -11   9   44.62    0.93
 -11 -10  12   25.79    0.86
  -9 -11   4   31.04    0.89
  -8  -8  13    5.98    0.76
  -8  -7  14   30.45    0.96
  -6 -10   3    5.30    0.59
  -6 -10   6    4.10    0.84
  -6  -7  12  135.27    1.21
 -14 -11   9    7.55    0.61
 -12 -11  10   26.04    0.79
 -11  -8  15   21.27    0.83
 -11  -7  16   26.89    0.84
 -10 -11   9   97.78    1.28
  -9 -10  11   65.90    1.21
  -8 -10  10   65.53    1.10
  -7  -6  14  196.53    1.40
  -6  -6  13   83.80    1.01
  -5  -7  11   95.02    1.12
  -3  -8   4   69.65    0.69
 -14 -11  10   15.80    0.69
 -13 -10  13   92.54    1.06
  -9 -11   8   26.41    0.91
  -9  -8  14    0.76    0.71
  -9  -7  15    1.54    0.80
  -8 -11   6   -0.16    0.73
  -8  -9  12    9.39    0.82
  -8  -6  15   22.56    0.87
  -7  -9  11    5.74    0.79
  -6 -10   2  379.84    1.62
  -6 -10   7   53.36    0.98
  -5  -9   8   48.75    0.91
  -5  -6  12    3.92    0.64
  -4  -9   3  267.26    1.26
  -4  -8   8  188.89    1.23
  -3  -8   5  369.16    1.41
  -3  -6   9  241.15    1.18
 -13  -8  16    0.25    0.64
 -12 -10  13    1.54    0.73
 -10 -10  12   58.20    1.04
  -9 -11   3    1.24    0.65
  -8 -11   4   72.39    1.00
  -5  -8  10   48.97    0.92
  -4  -9   2   51.47    0.69
  -4  -9   5   12.52    0.58
  -3  -5  10   74.35    0.72
 -13 -11  11    1.42    0.64
 -12 -11  11    2.05    0.71
 -11  -6  17   25.25    0.80
 -10 -11  10    4.52    0.78
  -9 -11   9    4.01    0.80
  -6  -9  10  246.40    1.61
  -4  -9   6  146.97    1.15
  -3  -7   8  542.39    1.77
 -11 -11  11   67.89    1.11
 -11 -10  13   75.09    1.05
  -9  -6  16    2.05    0.73
  -8 -11   8   13.02    0.85
  -6 -10   8  156.61    1.37
  -4  -7  10    0.87    0.57
  -4  -6  11   91.58    0.94
  -3  -8   6   97.51    0.84
 -12  -8  16   25.57    0.74
 -10  -7  16    7.65    0.73
  -9 -10  12   17.03    0.87
  -8 -10  11   16.84    0.89
  -7 -11   4   15.15    0.77
  -7 -11   5   37.23    0.91
  -7 -10  10  191.98    1.52
  -6 -10   1   11.15    0.55
  -5 -10   3  181.66    1.19
  -5  -9   9    0.89    0.72
  -4  -9   1  479.19    1.53
  -3  -4  11  155.11    0.95
 -13 -10  14    1.06    0.59
 -12  -7  17    2.94    0.62
  -9 -11  10   56.05    1.06
  -7  -8  13   40.73    0.92
  -7  -7  14  123.12    1.26
  -6  -8  12   47.12    0.96
  -6  -7  13  431.69    2.02
  -4  -9   7   44.76    0.81
  -4  -8   9   19.33    0.71
  -4  -5  12  226.95    1.32
  -2  -7   6   12.01    0.44
 -12 -11  12    0.92    0.68
 -11 -12   7   16.12    0.83
 -10 -11  11  109.88    1.22
 -10 -10  13   17.40    0.82
  -8 -11   9   14.66    0.89
  -8  -8  14   88.50    1.13
  -7 -11   3    7.02    0.67
  -6 -10   9   68.68    1.10
  -5 -10   2   24.78    0.61
 -12 -12   7    2.32    0.64
 -11 -12   6    0.48    0.67
 -11 -11  12   14.77    0.85
 -11  -9  15    7.88    0.72
 -11  -8  16    0.19    0.64
 -10 -12   6  126.97    1.28
  -8  -7  15   50.60    0.96
  -6  -9  11   16.03    0.86
  -5 -10   7   22.82    0.85
  -5  -8  11   37.60    0.91
  -5  -7  12   63.11    0.97
  -3  -7   9    8.56    0.54
  -2  -6   8  265.91    1.16
 -13 -12   7   15.08    0.64
 -13 -12   8   -0.35    0.58
 -11 -12   5   31.23    0.82
 -10 -12   5   27.19    0.91
  -9  -9  14   45.92    0.95
  -9  -8  15    9.38    0.77
  -7  -6  15   18.71    0.84
  -6 -11   5   17.00    0.83
  -6  -6  14    7.30    0.73
  -5  -6  13   40.17    0.91
  -4  -9   0   42.49    0.59
  -4  -9   8    5.23    0.68
 -13 -12   9   21.51    0.69
  -9 -12   5  170.21    1.42
  -9 -12   6  118.84    1.24
  -9 -12   7   59.25    1.02
  -9 -11  11    0.46    0.77
  -8 -11  10   11.93    0.87
  -8 -10  12   42.29    0.99
  -7 -11   2   32.04    0.78
  -7 -10  11   27.57    0.95
  -6 -11   6   36.41    0.95
  -5 -10   1  186.48    1.13
  -5 -10   8    3.47    0.92
  -5  -9  10  222.45    1.55
  -4  -7  11   14.23    0.78
  -3  -9   5  127.21    0.98
  -3  -5  11  124.96    0.96
  -2  -8   4    3.80    0.41
  -2  -7   7   47.96    0.63
 -13 -12  10    5.02    0.63
 -12 -11  13   20.37    0.78
 -10 -12   4   30.82    0.86
 -10 -12   9   15.92    0.80
 -10 -11  12    8.55    0.76
 -10  -9  15   65.16    1.05
  -9 -10  13   12.39    0.81
  -9  -7  16   12.91    0.74
  -7 -11   9  104.77    1.27
  -6 -11   3  191.34    1.33
  -6 -11   7   17.33    0.87
  -6 -10  10   10.19    0.86
  -3  -9   2   26.77    0.54
  -3  -8   8    7.81    0.57
 -11 -12  10    4.32    0.73
 -10  -8  16   11.60    0.78
  -9 -12   4    9.46    0.76
  -8 -12   5   56.07    1.10
  -8 -12   6   43.66    0.96
  -4 -10   3  251.28    1.32
  -4  -6  12  293.95    1.52
  -3  -9   6    3.27    0.55
 -11 -11  13    7.30    0.71
 -10 -12  10   11.05    0.88
  -9 -12   9   19.50    0.86
  -7  -9  13   68.79    1.17
  -7  -8  14   13.15    0.90
  -6 -11   2    5.29    0.70
  -6 -11   8    0.31    0.96
  -6  -8  13   14.49    0.93
  -4 -10   2  342.18    1.49
  -4 -10   6  295.04    1.59
  -3  -9   1   25.60    0.53
  -9 -11  12   43.81    0.97
  -8 -12   4  103.25    1.13
  -8 -12   8  106.40    1.25
  -8 -11  11    1.82    0.81
  -8  -9  14    1.30    0.71
  -7 -11  10    3.87    0.99
  -6  -9  12   32.49    0.94
  -5 -10   9   34.62    0.96
  -5  -8  12   33.68    0.99
  -2  -8   6   26.33    0.57
  -2  -6   9   33.17    0.57
 -11 -12  11    9.20    0.72
  -8  -8  15    2.67    0.73
  -7 -10  12    0.49    0.80
  -6  -7  14   76.68    1.07
  -5 -11   4  431.24    1.91
  -5 -11   6   10.86    0.95
  -4 -10   7   58.04    0.97
  -3  -9   7    1.19    0.58
 -11 -10  15   41.11    0.86
 -11  -9  16   22.50    0.72
 -10 -11  13  147.54    1.31
  -9  -9  15    0.87    0.77
  -8 -12   3   44.37    0.96
  -8 -12   9   98.56    1.32
  -7 -12   5    3.60    0.77
  -7 -12   6   55.02    1.04
  -7  -7  15  107.42    1.16
  -6 -10  11  172.59    1.48
  -5 -11   3  141.59    1.16
  -5  -7  13   64.31    0.98
  -4 -10   1   24.75    0.60
  -3  -6  11  159.06    1.10
  -2  -5  10   18.18    0.52
 -11  -8  17   23.77    0.70
 -10 -12  11   20.88    0.79
  -9  -8  16    6.19    0.77
  -7 -12   4   91.10    1.12
  -5 -11   7    1.65    0.81
  -4  -8  11   55.19    0.97
  -8 -11  12   27.06    1.03
  -8  -7  16    3.05    0.66
  -7 -12   8   21.21    0.92
  -5 -11   2  390.55    1.70
  -4  -9  10  196.68    1.48
  -4  -7  12  349.41    1.76
  -3  -9   8   43.36    0.83
 -11 -13   7    3.99    0.68
 -11 -11  14   50.14    0.87
  -9 -12  11    4.17    0.87
  -9 -11  13    4.64    0.84
  -8 -12  10   39.10    1.10
  -7 -12   3    1.97    0.74
  -7 -11  11  102.29    1.26
  -5 -11   8  135.85    1.40
  -3 -10   3  516.55    1.81
  -2  -9   3   46.72    0.65
  -2  -9   4   38.81    0.64
  -1  -7   6  348.63    1.31
 -12 -13   7   40.50    0.75
 -12 -13   8    4.44    0.53
 -11 -13   6   44.34    0.82
 -11 -13   8   44.56    0.85
 -10 -13   6    0.55    0.73
 -10 -13   7   26.44    0.84
 -10 -10  15   17.00    0.76
 -10  -9  16   32.32    0.77
  -7  -9  14    7.34    0.90
  -6 -12   4    4.88    0.90
  -6 -12   5   30.45    0.93
  -6 -11  10    7.44    0.88
  -6  -9  13   12.74    0.94
  -2  -9   2    0.63    0.39
  -2  -7   9   50.43    0.71
 -11 -13   9   16.75    0.71
  -9 -13   6   51.27    1.01
  -7 -12   9   92.70    1.23
  -6 -12   7    4.11    0.84
  -6  -8  14   89.75    1.19
  -5  -9  12   22.68    1.01
  -4 -11   4  334.75    1.68
  -4 -11   5   78.54    1.05
  -4 -10   0   35.74    0.63
  -4 -10   9  115.92    1.36
  -4  -6  13   79.49    1.00
  -3 -10   2  212.31    1.18
  -3 -10   6   15.26    0.71
  -3  -8  10  235.95    1.44
  -3  -7  11    0.94    0.59
  -2  -8   8  297.53    1.43
  -2  -6  10   87.67    0.82
 -10 -13   5   10.04    0.69
 -10 -11  14    1.46    0.66
 -10  -8  17   15.51    0.70
  -9 -13   5   19.32    0.85
  -8 -10  14   41.32    0.93
  -8  -9  15   11.61    0.78
  -7  -8  15   16.09    0.81
  -6 -12   3   39.29    0.94
  -5 -11   1  414.57    1.66
  -5  -8  13  137.68    1.30
  -4 -11   3   23.36    0.70
  -4 -11   6  162.30    1.36
  -2  -9   6   53.41    0.77
  -1  -6   8  279.55    1.20
 -11 -12  13   12.21    0.68
  -7 -11  12   96.95    1.30
  -6 -12   8    4.83    0.87
  -5 -11   9   34.23    1.04
  -5 -10  11   26.68    0.96
  -3  -9   9    0.48    0.68
  -2  -9   1  405.66    1.41
  -1  -8   5   73.72    0.72
 -10 -13  10   17.07    0.77
  -9 -13   4   16.01    0.82
  -9 -13   9   11.56    0.75
  -9 -10  15   26.01    0.83
  -8 -13   5   15.80    0.84
  -8 -13   7    7.44    0.79
  -8 -11  13   16.57    0.81
  -8  -8  16    7.59    0.76
  -7 -12  10   98.96    1.25
  -6 -11  11   39.76    1.15
  -6  -7  15    9.37    0.84
  -5  -7  14   14.62    0.88
  -4 -11   2   60.12    0.82
  -4 -11   7   21.30    0.90
  -4  -9  11   80.98    1.14
  -4  -8  12   33.12    0.91
  -3 -10   1   68.13    0.73
 -11 -13  11   -0.14    0.64
 -10 -12  13    1.17    0.71
  -9  -9  16   11.10    0.70
  -6 -12   2    3.65    0.74
  -5 -12   4   36.81    0.90
  -5 -12   5    3.99    0.81
  -5 -12   6   32.73    1.00
  -2  -9   7  172.81    1.20
  -2  -5  11   84.58    0.82
  -9 -13  10    6.56    0.77
  -7 -13   6    1.93    0.92
  -5 -12   7   26.77    1.12
  -5 -11  10   32.16    1.15
  -4 -11   8   46.28    1.05
  -4  -7  13  134.45    1.28
  -3 -10   8    1.96    0.74
  -2  -7  10   18.92    0.63
  -1  -8   6  166.00    1.03
 -10 -13  11    1.42    0.66
  -8 -13   9    1.50    0.75
  -8 -12  12  146.40    1.41
  -7 -13   5   44.19    0.97
  -5 -12   3   60.78    0.95
  -4 -11   1   35.51    0.73
  -3  -8  11   11.53    0.74
  -1  -7   8   41.64    0.65
 -10 -11  15   38.37    0.83
  -9 -12  13   99.88    1.15
  -7 -13   4    2.24    0.85
  -7 -13   8   14.46    0.87
  -7 -12  11   64.98    1.10
  -7 -10  14   32.99    0.91
  -6 -10  13    7.72    0.81
  -6  -9  14   34.38    0.92
  -5 -12   8   17.99    1.11
  -5  -9  13    1.76    0.92
  -3 -11   5   66.01    0.99
  -3 -10   0    0.88    0.48
  -2 -10   5   52.87    0.83
  -2  -9   8   13.75    0.70
  -1  -6   9   41.07    0.61
  -9 -13  11   52.54    1.01
  -8 -13  10    0.59    0.72
  -8 -10  15    4.56    0.75
  -7  -9  15   18.23    0.81
  -6 -12  10    1.91    0.85
  -6 -11  12   56.31    1.19
  -5 -12   2    3.33    0.72
  -3 -11   3    0.95    0.60
  -3 -11   6  279.69    1.65
  -2 -10   2  234.50    1.26
  -2  -6  11    0.13    0.49
  -1  -9   3  341.29    1.38
  -1  -9   4   14.21    0.54
  -1  -8   7  262.20    1.30
  -8 -11  14   30.40    0.89
  -7 -13   9   24.32    0.91
  -6 -13   5    1.48    0.95
  -6 -13   6   10.36    0.87
  -5  -8  14   32.82    1.01
  -4 -11   9    3.84    0.89
  -4  -9  12   56.38    1.06
  -2 -10   6  316.59    1.60
  -1  -9   5  547.62    1.83
 -10 -13  12    2.39    0.61
  -8  -9  16   27.14    0.77
  -7 -13   3   21.47    0.83
  -6 -13   7   34.17    1.01
  -5 -12   9   16.39    0.95
  -5 -11  11   -0.83    0.84
  -4 -12   4  473.97    2.07
  -4 -12   6  149.29    1.41
  -4  -8  13   44.31    1.02
  -3 -11   2  532.67    1.91
  -3 -11   7   56.20    1.03
 -10 -14   8    1.68    0.62
  -9 -11  15    7.62    0.71
  -9 -10  16    0.75    0.63
  -7 -12  12    3.25    0.76
  -7  -8  16   61.02    0.94
  -4 -12   3    2.90    0.68
  -2 -10   1    1.80    0.44
  -2  -8  10    3.78    0.64
  -1  -9   6   26.67    0.67
  -1  -5  10  114.66    0.84
 -10 -14   6    0.74    0.56
 -10 -14   9    3.17    0.62
  -9 -14   7   98.34    1.10
  -9 -14   8    2.51    0.74
  -9 -13  12   99.94    1.08
  -8 -13  11   11.08    0.77
  -8 -12  13    6.47    0.75
  -7 -13  10    3.63    0.78
  -6 -13   8    0.11    0.82
  -6 -12  11   37.82    1.00
  -4 -12   7    1.12    0.87
  -3  -9  11   82.47    1.12
  -2  -7  11   32.45    0.80
  -1  -9   1    2.37    0.40
  -1  -7   9   78.87    0.83
   0  -7   6  128.18    0.86
  -9 -12  14   -0.62    0.68
  -4 -11  10    1.57    0.87
  -3 -11   1    8.91    0.54
  -3 -11   8  135.76    1.36
  -3  -8  12   63.55    1.00
   0  -8   4   36.00    0.56
  -8 -14   7    0.10    0.77
  -8 -14   8   28.12    0.93
  -6 -13   9    2.31    0.84
  -6 -11  13    1.43    0.90
  -6 -10  14   75.81    1.12
  -5 -13   5    9.48    0.87
  -5 -12  10   38.65    1.05
  -5 -10  13    4.40    0.81
  -4 -12   2  122.90    1.10
  -2 -10   8  276.75    1.62
  -1  -9   7    1.75    0.59
  -1  -6  10   88.35    0.82
   0  -8   5   10.06    0.48
  -8 -14   5   17.46    0.81
  -7 -11  14    3.76    0.76
  -7 -10  15   72.13    1.02
  -6  -9  15   20.32    0.87
  -5 -13   4   76.46    1.13
  -5 -13   7   13.39    0.94
  -5  -9  14   34.99    1.02
  -2 -11   4   45.15    0.86
  -2 -11   5   42.72    0.89
  -2 -10   0  351.30    1.42
  -9 -14  10    5.19    0.66
  -8 -14   9    3.95    0.77
  -8 -13  12    4.92    0.74
  -8 -11  15   35.70    0.85
  -7 -14   7   22.53    0.96
  -5 -13   3   10.52    0.83
  -4 -10  12   15.74    0.89
  -4  -9  13  102.88    1.32
  -3 -12   5  109.79    1.23
  -3 -11   9    6.12    0.88
  -3  -7  13   20.45    0.86
  -2 -11   6   43.07    0.93
  -2  -9  10   73.89    1.14
  -2  -6  12    7.88    0.66
  -1 -10   3   19.44    0.62
  -1 -10   4   84.68    0.92
  -1 -10   5    7.73    0.72
   0  -6   8   20.56    0.50
  -9 -13  13   12.95    0.69
  -8 -14   4   11.03    0.80
  -8 -10  16   59.24    0.88
  -7 -14   5    4.11    0.78
  -7 -12  13    7.28    0.79
  -7  -9  16   30.28    0.79
  -6 -13  10   18.91    0.90
  -6 -12  12  101.65    1.22
  -5 -13   8   15.23    0.95
  -4 -12   1  229.78    1.40
  -4 -11  11   98.76    1.30
  -3 -12   3   24.13    0.81
  -3 -12   6    4.00    0.83
  -2 -11   2    4.92    0.57
  -1 -10   2   88.26    0.90
  -1  -8   9  247.45    1.39
   0  -8   6    2.23    0.47
  -5 -12  11  202.41    1.61
  -5  -8  15   17.43    0.90
  -3 -12   7   29.64    1.13
  -3 -11   0  140.26    1.02
  -2 -11   7   35.86    0.94
  -2 -10   9   30.74    0.91
  -1 -10   6   30.87    0.79
  -1  -9   8  120.16    1.11
  -1  -7  10   16.18    0.63
  -9 -14  11   78.62    0.97
  -7 -14   4    1.00    0.72
  -5 -13   2    8.66    0.81
  -5 -13   9   19.41    0.95
  -4 -13   6  124.86    1.50
  -4  -8  14    1.99    0.86
  -3 -12   2   49.51    0.93
  -3 -10  11  101.81    1.27
  -3  -9  12  220.40    1.60
   0  -9   4    0.41    0.47
  -7 -13  12   34.58    0.90
  -6 -14   5    0.37    0.89
  -6 -14   6   10.65    0.82
  -4 -13   4   26.40    0.88
  -4 -12  10   48.48    1.24
  -3 -11  10  647.67    2.68
  -2  -7  12   47.77    0.86
  -1 -10   1    4.20    0.48
  -1 -10   7    2.57    0.73
   0  -9   2    4.26    0.44
   0  -9   5   11.40    0.57
   0  -8   7   67.72    0.81
   0  -7   8    1.51    0.46
   0  -5   9  263.41    1.15
  -8 -13  13   10.35    0.69
  -6 -14   8    3.94    0.91
  -6 -13  11   70.91    1.09
  -6 -11  14   58.65    1.04
  -5 -11  13    0.45    0.88
  -5 -10  14  116.66    1.32
  -4 -13   3  110.68    1.26
  -3 -12   8    3.77    0.89
  -3  -8  13  126.27    1.29
  -2 -11   8   82.14    1.16
  -2 -10  -1   15.95    0.53
  -8 -14  11   14.26    0.72
  -7 -14  10   23.30    0.87
  -7 -11  15   -0.02    0.69
  -6 -14   4    2.56    0.78
  -6 -10  15    0.26    0.71
  -5 -13  10   73.25    1.27
  -4 -13   8   16.92    1.13
  -4 -10  13   10.39    0.97
  -2  -9  11  204.72    1.55
  -1  -8  10  509.48    1.98
  -1  -6  11   24.24    0.65
   0  -9   6    3.62    0.57
   0  -6   9   42.33    0.62
  -7 -12  14   15.11    0.73
  -7 -10  16    0.92    0.64
  -6 -14   9    1.38    0.88
  -5 -12  12   -0.59    0.77
  -4 -11  12   32.03    0.98
  -2 -12   5    1.46    0.77
  -1 -11   4   31.85    0.81
   0  -9   1  275.67    1.21
   1  -7   5   79.13    0.70
  -9 -15   7    0.47    0.56
  -5 -14   5   35.91    0.99
  -5 -14   6   15.43    0.91
  -5  -9  15   28.42    0.86
  -4 -13   2   14.35    0.73
  -4  -9  14    2.28    0.86
  -2 -12   6  191.24    1.51
  -2  -8  12  877.82    2.72
  -1 -11   5   34.79    0.86
  -1 -10   8   33.55    0.88
   0  -8   8    5.85    0.58
  -9 -15   6    2.30    0.54
  -8 -15   7   85.97    1.03
  -7 -14  11  142.95    1.28
  -6 -13  12    0.22    0.71
  -5 -14   4   -0.72    0.90
  -5 -14   7   10.14    0.88
  -4 -13   9  187.43    1.60
  -4 -12  11   17.64    0.93
  -3 -13   4   20.22    1.00
  -2 -11   9   18.40    0.92
  -1 -11   2   64.04    0.93
  -1 -11   6   98.53    1.14
  -1  -7  11  172.73    1.21
   1  -8   3   37.39    0.57
  -8 -15   6   13.10    0.69
  -8 -15   8   10.03    0.68
  -6 -14  10   64.94    1.04
  -5 -14   8   20.44    0.91
  -5 -13  11   12.04    0.96
  -3 -13   6   37.48    1.07
  -3  -9  13   23.96    0.94
  -2 -12   2  268.26    1.52
   0 -10   3  209.93    1.24
   0 -10   4   15.26    0.65
   0 -10   5   62.56    0.89
   1  -8   4    0.73    0.41
   1  -6   7   78.47    0.71
  -8 -15   5    3.16    0.65
  -7 -15   7    7.99    0.80
  -5 -14   3    2.67    0.87
  -3 -13   3    6.00    0.75
  -1 -11   7  185.23    1.45
  -1  -9  10  151.71    1.28
   0  -5  10   19.94    0.57
   1  -8   5  232.17    1.18
  -7 -15   6   64.18    0.98
  -7 -15   8    1.87    0.72
  -5 -14   9   12.04    0.84
  -5 -11  14  109.44    1.23
  -4 -13   1   30.07    0.84
  -3 -12   0   10.90    0.62
  -3 -12  10    4.72    0.90
  -2 -12   8   28.74    1.13
  -1 -11   1   27.07    0.67
   0 -10   6  198.35    1.34
  -7 -15   5   19.28    0.77
  -6 -12  14   21.25    0.79
  -6 -11  15   16.88    0.73
  -5 -12  13    1.05    0.78
  -4 -14   5    0.56    0.82
  -4 -11  13    2.05    0.80
  -3 -13   2    1.61    0.75
  -3 -13   8  134.36    1.46
  -2 -12   1   56.73    0.91
  -2  -9  12   -0.97    0.74
  -1  -8  11  617.59    2.22
   0  -8   9   28.25    0.72
   0  -6  10  160.35    1.05
   1  -8   6    1.55    0.49
   1  -7   7   26.21    0.57
  -7 -15   9   -0.95    0.65
  -7 -14  12   49.24    0.85
  -6 -14  11   10.82    0.77
  -5 -10  15   14.78    0.76
  -4 -14   4   75.80    1.14
  -4 -14   7   19.06    0.95
  -4 -10  14  181.27    1.51
  -1 -11   8    3.26    0.81
  -1 -10  -1   10.96    0.49
   0 -10   1   11.82    0.52
   0 -10   7   22.44    0.89
   1  -9   3   24.06    0.64
  -7 -15   4    2.76    0.72
  -6 -15   5   39.87    0.96
  -6 -15   7    5.96    0.77
  -6 -10  16   11.95    0.69
  -5 -14  10   17.41    0.93
  -5 -13  12   19.98    0.85
  -4 -14   3    8.48    0.90
  -3 -11  12    2.01    0.82
  -3 -10  13    4.17    0.97
  -1 -12   4   51.13    0.97
  -1 -12   5    1.72    0.78
   0  -7  10    6.69    0.64
   1  -9   4  114.75    0.94
   1  -6   8  155.61    0.97
  -7 -15  10   16.08    0.75
  -3 -13   9   21.56    1.00
  -2 -13   5   50.73    1.07
  -2 -12   9    2.23    0.88
  -1 -12   6    8.30    0.85
  -1 -11   0  142.50    1.08
  -1 -10  10   38.44    1.07
   1  -9   2    5.88    0.46
   1  -9   5    1.86    0.54
  -6 -15   4    0.72    0.73
  -4 -13  11  117.68    1.29
  -3 -13   1  206.56    1.38
  -2 -13   3   33.25    0.89
  -1 -12   2    9.18    0.80
  -1  -9  11    0.24    0.72
   0 -11   3    3.84    0.66
   0 -11   5   73.61    1.03
   0 -10   0   15.85    0.60
   0  -9   9    4.13    0.70
   1  -7   8   15.28    0.63
  -6 -15   9   33.23    0.84
  -6 -14  12   22.58    0.79
  -4 -14   9   78.60    1.17
  -3  -9  14   60.05    1.12
  -2 -13   7   16.28    0.96
  -2 -12   0   38.56    0.76
  -2 -10  12   57.61    1.08
  -1 -11   9   13.71    0.88
   0 -11   6    4.64    0.76
   0 -10   8   65.72    1.02
   0  -8  10    8.96    0.77
   1  -9   6   23.28    0.70
  -5 -15   5    8.20    0.82
  -5 -14  11    1.69    0.73
  -4 -14   2    8.26    0.76
  -3 -14   7   22.78    1.13
  -3 -13  10    6.04    1.02
  -2 -13   2   61.38    0.97
  -6 -15  10    3.80    0.72
  -5 -15   8    5.03    0.81
  -5 -12  14    5.78    0.71
  -5 -11  15    6.62    0.74
  -4 -12  13   18.80    0.86
  -4 -11  14   20.11    0.87
  -3 -14   3   75.40    1.18
  -2 -13   8   43.63    1.10
  -2 -12  10  371.60    2.09
  -2  -9  13  131.29    1.39
  -1 -12   1  141.25    1.16
  -1  -8  12   38.80    0.90
   0 -11   7   36.36    0.95
   1 -10   3    7.86    0.60
   1 -10   4   65.24    0.88
   1  -9   7  198.56    1.32
   1  -5   9   27.07    0.56
  -4 -14  10   23.76    0.87
  -3 -14   8    9.52    1.06
   0 -11   1  192.28    1.25
   1 -10   2    5.86    0.55
   1 -10   5   23.91    0.75
   1  -6   9    6.22    0.47
   2  -7   5   55.41    0.65
  -3 -11  13   12.39    0.87
  -2 -13   1    9.45    0.78
  -1 -10  11   87.21    1.18
   0  -9  10   23.19    0.82
   0  -7  11  415.52    1.79
   1 -10   6   37.20    0.85
   2  -8   3  256.34    1.18
   2  -8   4   25.30    0.56
  -5 -15   3    3.49    0.72
  -4 -15   5  128.27    1.38
  -4 -15   6    2.99    0.80
  -4 -10  15  102.49    1.17
  -3 -14   2   62.28    1.09
  -3 -10  14    3.32    0.85
  -2 -13   9   99.97    1.33
   0 -12   4   35.85    0.93
   0 -12   5   88.00    1.17
   0 -10  -1   12.38    0.49
   2  -8   2   52.26    0.62
   2  -7   6   76.56    0.76
  -5 -14  12    0.91    0.66
  -4 -15   4    4.25    0.82
  -3 -14   9  149.67    1.44
  -3 -13  11    0.12    0.77
  -2 -11  12    1.20    0.83
  -1 -13   3  249.09    1.63
  -1 -12   0   30.61    0.79
  -1 -12   9   61.11    1.14
  -1  -9  12  448.18    2.06
   1  -9   8    4.43    0.70
   2  -8   5   47.87    0.70
  -5 -15  10    2.81    0.70
  -4 -14  11    2.66    0.75
  -2 -14   4    9.75    0.85
  -2 -14   6   52.30    1.12
  -2 -10  13   22.07    1.01
  -1 -13   7   46.34    1.09
   0 -12   2   54.41    0.94
   0  -8  11   19.38    0.76
   1  -8   9   30.82    0.76
   2  -6   7    8.81    0.51
  -6 -16   6   16.77    0.73
  -6 -16   7    1.79    0.62
  -4 -15   3    6.04    0.84
  -2 -14   3   93.40    1.18
  -2 -14   7   -0.43    0.87
   1 -11   3    7.92    0.71
   1 -11   5   24.95    0.85
   2  -9   3   49.44    0.72
   2  -9   4   17.71    0.62
  -6 -16   5    7.47    0.68
  -4 -15   9   67.23    1.08
  -4 -12  14   10.90    0.74
  -3 -14   1   56.87    0.98
  -3 -14  10    6.77    0.92
  -2 -13   0   25.20    0.80
  -2 -13  10    0.13    0.85
  -1 -11  11   13.91    1.01
   0 -12   7   22.79    0.95
   0 -10  10   52.06    1.00
   2  -9   2  343.88    1.43
   2  -7   7  302.33    1.37
  -4 -13  13   27.18    0.83
  -3 -15   5   51.86    1.05
  -2 -14   2    2.52    0.83
  -2 -14   8  108.91    1.35
  -1 -13   8   39.31    1.07
  -1 -10  12    1.61    0.90
   0 -12   1   38.41    0.83
   0  -9  11   63.46    1.09
   1 -11   6   97.86    1.17
   1  -9   9   73.52    1.09
   1  -6  10   18.05    0.59
  -5 -16   6    7.75    0.75
  -5 -16   7    0.21    0.72
  -4 -11  15   16.51    0.75
  -3 -15   4   12.61    0.89
  -3 -15   7    4.31    0.81
  -3 -11  14  114.60    1.23
   0 -12   8   37.03    1.05
   1  -7  10    3.71    0.58
   2  -9   1   72.54    0.75
   2  -9   6  143.84    1.15
   2  -8   7   53.75    0.81
  -4 -15  10    1.45    0.68
  -4 -14  12    1.39    0.67
  -3 -15   3    0.63    0.86
  -3 -15   8   68.21    1.18
  -2 -12  12   18.92    0.91
  -1 -12  -1   47.51    0.85
   0 -13   4   -0.25    0.82
   0 -13   5   79.08    1.31
   0 -10  -2  188.67    1.10
   1 -11   7   31.46    0.94
   2 -10   4   48.47    0.84
   2  -6   8    6.10    0.50
  -2 -14   9   -0.11    0.82
  -2 -11  13   17.85    0.89
  -1 -14   6   13.61    1.08
  -1 -13   9    1.25    0.86
   0 -13   6    4.55    1.04
   2 -10   2   26.73    0.69
   2 -10   5    3.44    0.68
   2  -7   8   38.04    0.71
   2  -5   8  295.67    1.23
  -5 -16   4   45.96    0.85
  -3 -14  11   60.32    1.04
  -2 -14   1   64.00    0.99
  -1  -9  13   36.63    0.92
   0 -11  10    0.88    0.80
   0 -10  11    0.02    0.88
   0  -8  12   12.15    0.82
   1 -12   3   19.79    0.85
   1 -12   4  148.94    1.36
   1 -12   5   11.30    0.86
   1 -10  -1    4.07    0.47
   2  -9   0   24.23    0.54
  -4 -16   5    0.97    0.80
  -3 -15   2   26.29    0.92
  -2 -15   5   54.36    1.09
  -2 -15   6    1.26    0.97
  -1 -14   7   69.64    1.19
  -1 -12  11   14.48    0.89
  -1 -11  12   92.31    1.29
   0 -13   2    7.45    0.77
   0 -13   7   66.67    1.17
   0 -12   9    6.47    0.87
   1 -12   6   36.49    1.12
   1 -11   8   54.01    1.06
   2 -10   6  166.58    1.32
   2  -8   8   17.90    0.69
   3  -7   4    3.64    0.43
  -4 -15  11    6.63    0.65
  -2 -15   4   35.12    0.96
  -2 -14  10    3.89    0.91
  -2 -10  14  176.07    1.43
   1  -9  10  201.93    1.44
  -4 -16   4   12.16    0.85
  -4 -16   8   14.39    0.73
  -3 -13  13   -0.28    0.70
  -2 -15   3    5.57    0.88
  -1 -14   8   20.48    0.95
  -1 -13  10   24.90    0.95
   0  -9  12   20.97    0.94
   2 -11   3    2.35    0.70
   2 -11   4   14.16    0.79
   3  -8   2    4.51    0.43
   3  -8   3  228.07    1.16
   3  -8   4  339.47    1.44
  -3 -15  10   52.24    0.94
  -3 -12  14    1.12    0.65
  -2 -15   8    1.45    0.90
  -1 -10  13  167.21    1.44
   1 -12   1   47.70    0.90
   1 -12   7    6.84    0.88
   1  -7  11   11.75    0.75
   2 -11   5    5.69    0.78
   2  -9   8   18.14    0.77
   2  -7   9   16.11    0.69
   2  -6   9  105.02    0.95
   3  -8   5   44.72    0.73
  -2 -12  13    2.60    0.75
  -1 -14   1    1.26    0.79
   0 -11  -2   12.31    0.57
   0 -11  11    1.14    0.95
   2  -9  -1  429.20    1.52
   3  -8   1   19.90    0.48
   3  -7   6  270.48    1.31
   3  -6   6  265.44    1.21
  -3 -16   6    4.94    0.75
  -2 -15   2   46.67    0.97
  -1 -14   9   66.75    1.13
   0 -14   5   -0.35    0.84
   1 -10  10   37.97    0.95
   1  -8  11  231.49    1.47
   2 -11   6   10.33    0.83
   2  -8   9    9.17    0.67
   3  -9   2    3.44    0.50
   3  -9   4    3.39    0.58
  -3 -16   4   -0.54    0.75
  -2 -15   9   36.62    0.93
  -2 -14  11   -0.37    0.75
  -2 -11  14    0.69    0.67
  -1 -12  12    0.98    0.88
   0 -13   9   56.82    1.11
   1 -13   3   -1.26    0.81
   1 -12   0   30.28    0.87
   1 -12   8    1.05    0.83
   2 -10   8  191.72    1.45
   3  -9   5   88.16    0.98
  -3 -16   8   10.00    0.73
  -1 -15   4   90.15    1.20
  -1 -15   6    1.58    0.81
   0 -14   2   11.50    0.95
   0 -14   7   17.67    1.07
   1 -13   2    4.54    0.78
   1  -9  11   22.72    0.92
   2  -9   9   58.83    1.07
   3  -9   1    4.98    0.49
  -1 -15   3    3.35    0.79
  -1 -11  13    1.08    0.80
   2 -12   3    0.82    0.77
   2 -12   4   29.63    0.95
   2 -12   5   48.80    1.04
   2 -10  -1    1.76    0.49
   3 -10   3    7.09    0.66
   3 -10   4   12.47    0.72
   3  -7   7    1.82    0.53
   3  -6   7   90.13    0.81
  -2 -15   1   36.95    0.86
  -1 -14   0    0.64    0.66
  -1 -14  10   18.09    0.89
   1 -11  10   54.31    1.04
   2 -12   2   49.01    0.98
   3 -10   5  315.51    1.68
   3  -8   7   38.83    0.78
  -2 -15  10    0.78    0.70
  -1 -15   2    2.21    0.83
  -1 -15   8   14.89    0.87
   0 -14   1   -0.10    0.83
   0 -14   8   21.68    0.93
   0 -12  11   28.64    0.96
   1 -13   1   24.57    0.84
   2  -7  10   12.47    0.73
   3 -10   1   88.04    0.94
  -2 -16   7   18.86    0.84
  -2 -14  12   14.00    0.76
  -2 -13  13    9.53    0.68
   0 -11  12    0.38    0.79
   1 -10  11   12.89    0.83
   2 -12   1   -0.31    0.72
   2 -10   9   30.95    0.89
   2  -8  10  109.29    1.10
   3 -10   6    0.48    0.73
   3  -9   7   13.32    0.76
  -2 -16   3    2.36    0.79
   0 -13  -1   59.68    0.91
   1 -14   5    3.94    1.02
   1 -13   8   28.93    1.01
   2 -12   7    0.27    0.84
   3 -11   3    7.91    0.76
   3 -11   4  117.60    1.22
   3  -7   8   30.07    0.76
  -2 -16   8   78.53    1.03
  -1 -15   9    6.63    0.78
  -1 -13  12    6.84    0.77
  -1 -12  13   29.01    0.90
   0 -15   5    9.57    0.85
   0 -15   6   -0.52    0.94
   0 -14   9    7.80    0.82
   1 -14   6    4.78    1.02
   1 -13   0    3.16    0.69
   2 -13   4   38.26    1.16
   2  -9  10    9.80    0.73
   3 -11   2   19.70    0.78
   3  -8   8    5.35    0.65
   4  -7   3  285.49    1.23
  -1 -15   1   29.68    0.87
   0 -15   3  145.93    1.37
   0 -14   0   14.71    0.87
   1 -14   2    1.60    0.91
   1 -12  10    0.43    0.78
   2 -13   3  105.13    1.27
   3  -9  -1   25.91    0.55
   4  -8   3   35.97    0.65
   4  -8   4  188.45    1.17
   4  -7   2   31.82    0.54
   4  -7   4  115.89    0.90
  -2 -16   2   13.57    0.81
  -1 -16   5   11.53    0.90
   0 -15   7  117.02    1.29
   1 -14   7  105.14    1.29
   1 -13   9    5.36    0.83
   1 -11  11   30.05    0.96
   2 -12   8   33.07    0.99
   2 -11   9   57.95    1.06
   3 -11   6    5.12    0.82
   3  -9   8   33.66    0.85
   3  -5   8  135.67    0.91
   4  -8   2   47.67    0.59
   4  -7   5  176.29    1.10
  -1 -16   4   13.15    0.86
  -1 -16   6    6.53    0.81
   0 -15   2   -0.34    0.75
   0 -13  11    8.36    0.83
   0 -12  12   42.13    0.97
   4  -9   2   20.01    0.62
   4  -9   3   90.09    0.94
   4  -9   4   44.29    0.81
   4  -8   1  326.60    1.30
   4  -6   5   90.40    0.79
  -1 -16   3   18.01    0.87
  -1 -16   7   55.25    1.01
  -1 -15  10    1.43    0.68
   0 -14  10   24.47    0.96
   1 -14   1   54.95    1.01
   3 -12   3   89.44    1.18
   3 -12   4    2.94    0.83
   3 -11   7    6.53    0.98
   3 -10   8    1.91    0.90
   4  -9   5  242.30    1.51
   0 -11  13  110.68    1.24
   1 -14   8   43.67    1.00
   1 -13  -1    0.15    0.68
   2 -13   7  109.45    1.31
   2 -12  -1   57.96    0.99
   2  -8  11    7.35    0.78
   3 -12   2   11.64    0.82
   3 -12   5   66.30    1.13
   3  -8   9   27.15    0.77
   3  -7   9   74.26    0.90
   4 -10   3   14.93    0.73
   4  -9   1  206.08    1.18
   4  -8   6  144.22    1.16
  -1 -16   8    0.93    0.69
   0 -15   1    7.73    0.78
   1 -12  11    4.95    0.88
   2 -12   9   16.73    0.88
   2 -11  -2    5.38    0.57
   3 -12   6    6.35    0.87
   3  -6   9  163.00    1.10
   4 -10   2   26.32    0.75
   4  -8   0  145.26    0.89
   4  -6   6  229.06    1.19
  -1 -16   2   49.98    0.95
  -1 -13  13    3.32    0.61
   1 -15   3    8.17    0.96
   1 -15   5    4.52    0.82
   2 -14   3    1.49    0.85
   2 -14   4   37.00    1.03
   2 -14   5    1.73    0.85
   3  -9  -2   26.90    0.56
   4 -10   1   64.57    0.95
   4 -10   5   58.39    0.99
   4  -9   0   41.14    0.71
  -2 -17   4    1.52    0.69
   0 -15   9    1.14    0.73
   1 -15   6   12.69    0.84
   1 -14   9    5.73    0.88
   1 -11  12  201.23    1.55
   2 -13   8   35.99    0.99
   3 -11  -1    9.34    0.74
   3 -11   8  285.50    1.78
   0 -16   6   36.83    0.95
   0 -14  11    0.78    0.74
   2 -14   6   34.91    1.00
   3 -13   3    9.88    0.89
   3 -13   4   23.40    0.98
   3 -12   0   11.73    0.78
   3 -12   7  170.66    1.50
   4 -11   2    4.47    0.74
  -2 -17   3    1.71    0.65
   0 -16   3    1.42    0.78
   0 -16   7    4.56    0.79
   0 -12  13    2.13    0.72
   1 -15   7    5.24    0.79
   3 -13   2   30.06    0.98
   3 -13   5    0.60    0.86
   4 -11   5   25.93    0.92
   4 -10   0   34.95    0.74
   4  -9   7  103.11    1.14
   4  -6   7   10.95    0.53
  -1 -16   1   21.45    0.78
   2 -14   7    4.82    0.81
   2 -12  10    3.74    0.80
   3 -13   6   37.38    1.16
   4 -11   1    4.12    0.72
  -1 -17   5   22.24    0.81
   0 -15  10   -0.95    0.63
   1 -15   1    6.86    0.82
   1 -15   8   10.80    0.81
   1 -14  -1    1.91    0.78
   1 -13  11    1.07    0.81
   4 -11   6   17.12    0.89
   4 -10   7   47.79    0.99
  -1 -17   4    5.15    0.65
   0 -16   8    9.48    0.72
   2 -11  -3    6.07    0.64
   2 -11  11    4.29    0.79
   3 -12  -1   12.91    0.76
   4 -12   3   84.54    1.19
   4 -12   4   84.56    1.20
   4  -7   8   48.84    0.86
   4  -5   7  306.29    1.31
   5  -8   2    4.61    0.50
   5  -8   3   96.63    0.92
   5  -7   3   15.89    0.54
   2 -15   4   25.61    0.93
   2 -15   5    6.02    0.82
   3 -13   7   21.71    0.93
   4 -12   2   76.59    1.14
   4 -12   5    3.97    0.86
   5  -9   2   30.25    0.71
   5  -9   3   48.69    0.84
   5  -8   4   34.10    0.74
   5  -7   2  120.24    0.87
  -1 -17   3    1.27    0.62
   1 -16   5   83.94    1.16
   2 -15   6   57.78    1.13
   3 -14   4    0.60    0.85
   3 -10  10    1.65    0.78
   4  -6   8    4.71    0.57
   5  -9   4   73.57    0.98
   5  -8   1   85.53    0.79
   5  -7   1  118.69    0.82
   1 -16   3   40.25    0.98
   1 -16   6   -0.31    0.74
   1 -15   0   94.82    1.14
   1 -15   9   18.90    0.80
   2 -15   2   28.45    0.91
   2 -13  10    1.05    0.82
   3 -14   5   94.98    1.26
   3 -12   9   10.83    0.94
   4 -12   6  106.21    1.29
   4 -10   8  199.08    1.51
   5 -10   2   31.87    0.82
   5 -10   3    4.41    0.73
   5  -9   1   85.56    0.89
   5  -7   5    0.60    0.53
   5  -6   4    9.82    0.48
  -1 -17   2   11.06    0.70
   2 -13  -2   61.55    1.02
   2 -12  11    9.08    0.80
   3 -14   6    6.12    0.83
   3 -13   8   19.05    0.88
   4  -9  -2   50.40    0.67
   5 -10   4   83.72    1.10
   5  -8   0    0.36    0.41
   5  -6   5   25.98    0.67
   0 -17   5   64.97    0.96
   1 -16   2   12.53    0.80
   1 -16   7   22.62    0.80
   1 -14  11    8.31    0.74
   2 -15   7   14.68    0.83
   2 -14  -1   64.61    1.11
   3 -11  10   24.02    0.91
   4 -13   4    2.86    0.88
   4  -8   9    1.27    0.81
   5 -10   1    3.90    0.66
   5 -10   5   44.63    0.97
   5  -7   6  244.82    1.44
   1 -13  12    1.80    0.64
   3  -9  11   16.29    0.87
   4 -13   5    4.63    0.87
   4 -12   7   14.51    0.91
   4 -11   8   49.20    1.02
   4  -9   9  112.41    1.23
   4  -7   9  277.39    1.50
   5 -11   2   17.84    0.85
   5 -11   3   10.14    0.84
   5 -11   4  194.25    1.52
   5  -9   6  102.18    1.16
   0 -17   3   45.58    0.85
   1 -16   1   19.41    0.89
   3 -14   7   24.42    0.92
   5 -11   1   12.08    0.79
   5 -10   0  107.44    1.04
   5  -6   6   56.18    0.81
   3 -14   0    5.07    0.81
   3 -13   9    8.54    0.87
   3 -11  -3    1.42    0.58
   4 -13   6    0.97    0.83
   4 -10   9   -0.72    0.74
   5 -11   5    2.95    0.83
   5  -9  -1  388.75    1.58
   5  -8  -1  169.83    0.97
   5  -8   7    3.06    0.79
   5  -5   5   99.00    0.80
   0 -17   2   19.76    0.73
   2 -16   3    4.71    0.82
   2 -16   5   24.19    0.87
   2 -14  10    1.64    0.74
   3 -15   4    2.53    0.79
   3 -15   5    7.47    0.78
   3 -12  10    1.01    0.75
   4 -13   0   58.15    1.18
   5 -12   3   11.19    0.90
   5  -9   7   73.24    1.05
   5  -7   7    7.24    0.72
   2 -16   6   32.33    0.84
   3 -15   2   49.78    1.03
   3 -14   8    4.24    0.79
   4 -12   8  130.05    1.33
   5 -12   4   41.32    1.04
   5 -11   0  380.67    1.85
   6   3   6    2.50    0.57
   7   2   8   93.21    1.25
   8   0  10    7.99    1.29
   8   1   9   25.59    1.06
  10   2   6   48.49    1.22
  11   2   5    3.29    0.84
  12  -1   8    2.77    0.85
  13   2  -3    1.86    0.74
  15  -2   5   29.71    0.81
   4   2   8  388.41    1.73
   6   2   8  286.68    1.83
  11   3   0   50.56    0.92
  11   3   1   75.13    1.06
  14   1   2   23.35    0.93
  16  -2   3    3.59    0.63
   5   2   8   18.17    0.70
  10   3  -2    0.71    0.45
  11  -3  10    9.81    0.88
  12   2  -4  294.87    1.52
  14   0   4    3.05    0.76
  16  -1   1   22.85    0.94
   7   1   9   11.35    0.94
   7   3   5    7.19    0.63
   9  -1  10    6.83    1.32
   9   1   8  240.62    1.90
   9   3  -2   29.88    0.57
  10   3   2    5.66    0.70
  12  -3   9   18.48    0.81
  12   1   5    3.76    1.00
  13   2  -1   33.57    0.91
  14  -2   6    1.12    0.71
  17  -2  -1    1.93    0.71
   9   0   9   29.10    1.14
  10  -2  10   85.78    1.55
  10   1   7  115.86    1.44
  10   3   1  136.96    1.20
  11   2   4   14.74    0.89
  13   0   5   27.58    1.06
  14   1   1   52.88    1.08
  15   0   1    5.39    0.80
  17  -2  -3    8.58    0.76
  10   3   0    0.01    0.56
  11  -2   9    1.54    1.02
  11   2  -4   16.99    0.61
  12   2  -3  203.86    1.36
  12   2   2   14.58    0.86
  13   1  -5   30.49    0.71
  13   1   3    5.58    0.85
  16  -2   2    2.74    0.74
   6   1   9   67.40    1.14
   7   3   4   11.26    0.60
   9   3   2  341.65    1.69
  10  -1   9   29.90    1.21
  10   0   8   98.04    1.44
  12  -2   8   35.27    1.10
  13  -1   6    3.21    0.75
  14   1  -1  123.81    1.34
  16  -3   3   10.72    0.73
   4   1   9  363.59    1.68
   5   1   9    3.16    0.75
   6   2   7   24.87    0.85
   8   1   8    2.93    0.89
   9   3   0   68.70    0.82
   9   3   1   96.41    0.98
  11  -1   8   36.62    1.10
  12   2  -2  141.35    1.22
  12   2   1    9.01    0.80
  15   0  -3    1.41    0.82
  15   0  -1   16.30    0.99
  16  -1  -2    8.28    0.88
  17  -3   0   47.74    0.89
   5   2   7   43.97    0.78
   6   0  10  263.30    1.85
   8   3   2    0.05    0.48
  12   1   4  139.12    1.45
  12   2   0  302.12    1.79
  13   1   2    7.24    0.86
  15  -1   2   45.06    1.11
   8  -1  10    3.45    1.21
   8   3   1  132.10    1.02
   9   1   7   40.82    1.09
  11   1   5    1.50    0.84
  11   2  -3   10.77    0.55
  14  -3   6    5.69    0.68
  14  -1   4    5.84    0.79
  14   0   2   11.45    0.88
  16  -2   1    4.79    0.80
   7   1   8  146.70    1.55
  10  -3  10   10.29    1.16
  13   1   1   28.85    1.07
  17  -3  -2    5.99    0.71
   7   2   6   57.59    0.94
  11  -3   9    8.51    1.03
  11   2  -2   43.63    0.83
  12   1   3    4.89    0.98
  13   1  -3    1.62    0.72
  15  -3   4   33.58    0.90
  15  -1   1   13.43    0.99
  16  -3   2    2.16    0.69
  17  -3  -3    6.31    0.67
   9  -1   9   13.20    1.12
  10   2  -3    1.75    0.49
  10   2   3  183.17    1.45
  11   2   1   36.95    0.88
  12  -3   8   41.37    1.05
  13  -2   6    1.78    0.85
  13  -1   5    1.56    0.81
  13   1  -2    4.90    0.82
  13   1   0   13.43    0.87
  15  -1  -5   22.64    0.82
   6   1   8   26.33    0.86
   6   2   6   53.31    0.83
   8   1   7   40.29    1.14
   8   2   5   49.08    0.91
  10  -2   9   21.44    1.22
  11   2   0   99.75    1.10
  13   1  -1    3.53    0.76
  14  -4   6    1.37    0.67
  14  -1   3   22.05    0.93
  16  -2  -4   76.22    1.10
  16  -2  -1    5.33    0.89
  10  -1   8   25.22    1.12
  11  -2   8   15.36    1.02
  12  -1   6    1.82    0.85
  12   1   2    5.25    0.96
  16  -3   1    2.36    0.80
  17  -4  -1   39.53    0.86
   4   1   8   28.64    0.72
   5   1   8  270.33    1.59
  10   1   5   68.50    1.14
  10   2  -2   65.38    0.77
  10   2   2   53.11    0.92
  14  -3   5   20.68    0.84
  14  -2   4   29.30    0.92
  15  -2   2    6.49    0.79
  15  -1  -1    1.84    0.92
  17  -4  -2    0.25    0.65
  10   2   1   16.46    0.69
  12   0   4    1.40    0.84
  13  -4   7   17.63    0.78
  15  -4   4    7.32    0.68
  15  -3   3   -0.41    0.79
  15  -1  -3    0.89    0.70
  17  -4  -4   25.42    0.71
  17  -4  -3    7.21    0.71
   7   1   7  139.00    1.32
   8   2   4   20.39    0.70
  10   2   0    4.56    0.57
  11  -4   9   96.43    1.33
  11   1   3   31.07    0.92
  12  -4   8   38.35    0.97
  12   1   1    3.30    0.75
  13  -1   4   61.33    1.15
   9   0   7   87.00    1.41
  11   0   5  217.92    1.71
  12   1   0   29.13    0.86
  13  -3   6    1.96    0.74
  13  -2   5   15.74    0.88
  15  -2   1    5.55    0.80
   7   2   4   94.85    0.93
   9   2   2   18.06    0.65
  10  -5  10   16.56    1.05
  10  -3   9   73.34    1.53
  10   1   4   16.52    0.83
  12  -1   5    3.25    0.85
  13   0   1   15.39    0.87
  16  -3  -1   23.78    0.96
   6   1   7    6.93    0.64
   8   2   3    2.73    0.52
   9  -1   8  267.34    2.05
   9   1   5    0.55    0.71
   9   2   1    4.73    0.53
  11   1   2    3.47    0.73
  12  -2   6   20.27    1.07
  13  -5   7    2.69    0.62
  14  -4   5    2.47    0.69
  15  -5   4   24.08    0.73
  17  -5  -2    1.21    0.58
   9   2   0    4.82    0.48
  10  -2   8    6.98    1.00
  10  -1   7  121.49    1.47
  11  -5   9   -0.67    0.84
  11  -2   7   45.47    1.24
  11  -1   6   48.32    1.12
  12  -5   8    2.66    0.78
  13  -1   3    7.26    0.86
  14  -3   4    2.03    0.73
  15  -4   3   33.83    0.95
  15  -3   2   15.43    0.82
  16  -3  -3   13.03    0.86
  16  -3  -2   35.26    0.94
   5   1   7   34.45    0.69
   7  -1   9   12.63    1.09
   7   2   3  372.26    1.54
  11   1  -3    0.90    0.47
  13   0  -3   35.24    0.81
  13   0  -1  253.04    1.66
  14  -1  -4   10.97    0.77
   7   1   6    6.83    0.65
   8   2   1   19.60    0.55
  11   1   1   10.17    0.74
  13  -4   6    1.68    0.76
  15  -2  -4   21.55    0.81
  15  -2  -2   10.01    0.93
  16  -5   1    4.11    0.73
   8  -3  10    5.02    1.29
   8   1   5   63.06    0.93
  11   1  -2    5.42    0.53
  11   1   0   42.22    0.82
  12  -6   8    3.66    0.66
  12  -1   4  141.51    1.44
  12   0   2   25.34    0.89
  13  -3   5   -0.08    0.75
  13  -2   4   38.33    1.02
  14  -5   5    8.24    0.73
  14  -2   2   61.06    1.12
  14  -1  -3   24.28    0.80
  15  -3   1    1.59    0.75
  15  -2  -3   51.66    0.97
   6   0   8    2.26    0.68
  11  -6   9   18.57    0.76
  12  -4   7    9.24    0.85
   8  -2   9    8.39    1.03
   8  -1   8    4.72    0.91
  10   1   2   15.86    0.69
  11  -4   8    1.68    0.88
  11  -1   5    1.36    0.82
  12  -2   5    9.75    0.87
  14  -4   4   62.47    1.03
  14  -3   3   21.85    0.89
  15  -4   2    4.36    0.72
  16  -4  -2    2.05    0.78
   9  -3   9    1.69    1.14
   9  -1   7   41.34    1.09
  10   1  -3  172.15    1.03
  12  -3   6    6.12    0.83
  13  -5   6    1.02    0.75
  13  -1  -5   30.26    0.74
  14  -2   1   62.40    1.11
  16  -6   1    1.68    0.61
  16  -4  -4   16.30    0.71
  16  -4  -3   13.03    0.76
   7   0   7   66.21    1.00
   9  -2   8   32.01    1.14
  10   1   1   90.15    0.96
  11  -3   7    1.01    0.84
  11  -2   6    5.36    0.88
  13  -1   1   29.45    0.93
   8   1   4  196.66    1.28
  10  -2   7    3.40    0.88
  10   0   4    4.76    0.73
  10   1  -2   26.70    0.57
  10   1   0   21.22    0.62
  12  -5   7   22.19    0.91
  12  -1   3    4.76    0.80
  14  -2  -5   12.64    0.70
  15  -6   3   26.11    0.77
  15  -4   1   19.32    0.92
  15  -3  -1    8.53    0.80
  16  -5  -1   40.04    0.95
  10  -5   9   28.69    1.08
  11  -5   8   27.72    1.02
  13  -3   4   56.29    1.08
  13  -1   0   11.32    0.81
  14  -5   4   28.84    0.91
  14  -3   2   10.67    0.84
  15  -5   2   39.26    0.92
  15  -3  -4  153.09    1.33
  15  -3  -2   81.34    1.22
  16  -6   0    3.87    0.67
   5  -1   9    3.68    0.70
   7  -1   8  145.24    1.43
  11  -1   4   16.37    0.85
  13  -6   6   -0.14    0.64
  13  -1  -1    4.08    0.84
  14  -4   3    0.84    0.74
  14  -2  -4    8.71    0.74
   9  -6  10   49.74    1.27
  12  -2   4    1.32    0.81
  12  -1   2    6.36    0.78
  13  -2   2   24.62    0.93
  13  -1  -3    2.20    0.61
  16  -5  -4    4.67    0.68
   4  -1   9  381.55    1.72
   8  -1   7   38.95    0.98
   9  -4   9   29.21    1.27
   9   1   1    7.78    0.51
  11  -4   7   14.52    1.03
  12  -3   5    6.06    0.83
  16  -6  -1    1.08    0.69
   9   1   0  272.69    1.30
  10  -6   9   17.25    0.92
  10  -4   8   24.76    1.04
  11  -6   8    5.27    0.76
  11  -2   5    3.36    0.81
  13  -5   5    0.64    0.69
  14  -6   4   29.19    0.83
  15  -6   2   -0.11    0.68
  15  -5   1    2.90    0.70
   5   0   7  245.12    1.37
   9  -7  10    9.70    0.84
   9  -3   8    1.70    0.96
   9  -2   7   47.46    1.23
  10  -3   7   84.70    1.38
  11  -3   6   51.68    1.10
  11   0  -3  717.23    2.10
  12  -1  -5   71.00    0.79
  12  -1   1    4.04    0.72
  13  -3   3    4.22    0.81
  13  -2   1   42.43    1.01
  14  -4   2   21.05    1.00
  15  -4  -1   20.34    0.85
  16  -6  -2   27.53    0.84
   6  -1   8   23.04    0.79
   7   1   3    4.64    0.45
  12  -7   7   13.67    0.70
  12  -2   3    3.46    0.78
  14  -5   3   92.18    1.16
  15  -4  -5   25.62    0.73
  15  -4  -2    1.38    0.85
  16  -7  -1    1.59    0.64
  16  -6  -4   47.80    0.85
  16  -6  -3    2.57    0.67
   6  -2   9    3.03    0.82
   7  -4  10    4.79    1.28
   8   1   1  691.42    1.93
  11  -7   8   11.04    0.77
  12  -5   6    8.24    0.78
  14  -7   4    3.52    0.65
  15  -7   2   36.46    0.79
  15  -4  -4    9.75    0.79
  15  -4  -3    2.09    0.79
   7  -1   7  135.39    1.30
   9  -5   9    0.16    1.16
  12  -3   4    7.33    0.84
  13  -6   5   10.09    0.75
  13  -2  -5    3.69    0.54
  13  -2   0   85.67    1.15
  14  -3  -5   34.01    0.80
  15  -6   1    0.91    0.72
  16  -7  -2   12.08    0.68
  10  -5   8   -0.58    0.88
  11  -8   8    0.99    0.62
  12  -1  -3   60.72    0.88
  13  -3   2    8.74    0.84
   5  -1   8  264.05    1.50
   7  -3   9    0.48    0.97
   7  -2   8  102.17    1.38
   8  -6  10    2.70    1.19
   8  -4   9    3.85    1.24
   9  -1   5    1.02    0.68
  11  -1   2    4.00    0.69
  12  -2   2   15.43    0.83
  12  -1  -2   43.02    0.80
  13  -5   4   19.03    0.85
  13  -4   3   54.57    1.17
  14  -6   3    0.08    0.68
  14  -5   2    3.58    0.89
  14  -3  -4   88.60    1.02
  14  -3  -2   16.64    0.81
  15  -5  -1    0.75    0.71
  16  -7  -4    1.86    0.53
  10   0   0    3.17    0.50
  11  -4   6    0.08    0.82
  11  -3   5    2.36    0.80
  13  -7   5   10.03    0.71
  13  -2  -3    2.30    0.62
  15  -7   1   -0.01    0.66
   8  -3   8    3.60    0.95
   8  -2   7   26.69    0.94
   9  -4   8    1.46    0.96
  10  -4   7    5.71    0.87
  10   0  -2  403.80    1.53
  11  -1  -5  497.27    1.62
  13  -3   1   40.21    1.09
  15  -5  -5   -0.26    0.58
  15  -5  -2   14.21    0.79
  16  -8  -4    0.65    0.50
  16  -8  -3    4.86    0.53
   4  -1   8   28.28    0.70
   9  -6   9   21.97    1.06
   9  -3   7   87.01    1.28
  11  -6   7  106.88    1.25
  11  -1   1    9.90    0.67
  12  -3   3    1.48    0.78
  13  -8   5    0.02    0.58
  14  -7   3    5.42    0.68
  15  -8   1   22.47    0.69
   6  -1   7    6.01    0.60
   8  -7  10    6.70    0.95
  12  -5   5   72.40    1.15
  12  -2   1    9.48    0.75
  14  -6   2   50.53    1.07
  14  -5   1   55.97    1.05
  15  -6  -1   54.44    1.05
  13  -5   3   53.29    1.15
  13  -4   2    4.07    0.81
  13  -3   0   46.99    0.99
  14  -8   3   11.12    0.68
   4  -2   9  163.04    1.25
   6  -2   8  298.28    1.76
   7  -1   6    6.15    0.62
   9  -7   9   41.97    1.10
  11  -7   7    6.28    0.75
  12  -2  -5  240.76    1.28
  12  -2   0  298.02    1.68
  14  -4  -5    3.98    0.59
  14  -4  -2   37.51    1.01
  15  -6  -2   12.12    0.86
   8  -8  10    0.64    0.78
   9  -5   8   11.10    1.14
  10  -1   2   14.79    0.66
  11  -4   5   36.79    0.98
  11  -1  -3    1.37    0.45
  11  -1  -2    6.05    0.51
  12  -3   2    0.29    0.88
  13  -7   4    9.28    0.81
  13  -3  -5  108.65    1.02
  14  -4  -4    8.07    0.68
  14  -4  -3    1.03    0.68
  15  -6  -3   44.84    0.95
   5  -1   7   34.56    0.71
   7  -2   7   40.46    1.00
  11  -8   7   37.58    0.89
  11  -2   2   36.01    0.86
  12  -6   5    0.91    0.74
  14  -7   2    0.46    0.70
  15  -7  -1    8.08    0.72
  15  -6  -4   60.16    0.92
   7  -3   8   13.08    0.93
   8  -4   8    7.00    1.12
   9  -8   9    5.38    0.77
   9  -2   5  108.22    1.16
  10  -8   8    6.71    0.76
  10  -3   5  343.67    1.90
  12  -5   4   38.88    1.11
  12  -4   3    1.23    0.92
  12  -2  -2  142.22    1.16
  13  -4   1  202.23    1.57
  13  -3  -3    0.11    0.73
  13  -3  -2  181.58    1.38
   6  -5  10    6.97    1.25
   8  -3   7  117.23    1.34
   9  -9   9   11.76    0.72
   9  -4   7   21.41    0.97
  10  -1   1   87.73    0.91
  11  -9   7    5.83    0.61
  13  -8   4    3.03    0.66
  13  -6   3   40.89    0.96
  13  -5   2   37.41    0.98
  14  -8   2   30.41    0.84
  15  -8  -1    2.28    0.66
  15  -7  -2   16.97    0.80
   5  -2   8   18.71    0.76
  10  -9   8    2.03    0.59
  12  -3   1    8.56    0.76
  13  -9   4    5.67    0.62
  14  -9   2   24.50    0.78
  15  -9  -1   -0.36    0.61
  15  -7  -3   11.04    0.79
   5  -3   9    4.98    0.81
   8  -1   4  198.31    1.24
   9  -6   8    1.55    0.87
  10  -1   0   21.05    0.59
  11  -3   3    7.16    0.77
  11  -2   1   34.95    0.81
  14  -7   1    5.89    0.73
  14  -5  -5   14.74    0.71
  15  -8  -2    5.24    0.70
  15  -7  -4    1.09    0.60
   7  -7  10   17.65    1.04
  11  -5   5    6.51    0.82
  11  -4   4   12.88    0.85
  14  -5  -4   21.20    0.82
  14  -5  -3   29.28    0.91
  10  -1  -3  172.41    0.99
  11  -2  -5   41.17    0.63
  11  -2   0   96.04    1.07
  12  -6   4   29.98    0.93
  12  -4   2    4.97    0.79
  12  -3   0    3.67    0.71
  13  -6   2    4.70    0.93
  13  -5   1    9.42    0.83
  14  -8   1    7.96    0.79
  15  -9  -2    8.71    0.62
  15  -8  -4   -0.31    0.63
  15  -8  -3    1.34    0.62
   6  -3   8    0.57    0.85
   6  -2   7   25.99    0.74
   8  -7   9   49.76    1.21
   8  -5   8    7.58    1.16
  10  -1  -2   27.34    0.55
  12  -9   5   12.14    0.69
   7  -2   6   59.19    0.91
   8  -2   5   48.62    0.85
   9  -7   8   32.96    1.02
   9  -5   7   17.75    0.94
  10  -4   5    4.45    0.79
  11  -3   2    5.26    0.72
  12 -10   5    0.67    0.52
  13  -4  -2   26.96    0.82
  14 -10   1    0.72    0.60
  15  -9  -4    7.76    0.59
  15  -9  -3   12.82    0.63
   4  -3   9    1.05    0.74
   7  -4   8    1.54    0.90
   9  -3   5    7.76    0.75
   9  -1   1    8.93    0.49
  11  -6   5   31.71    0.95
  12  -7   4    4.59    0.89
  12  -3  -5    5.16    0.51
  13  -9   3   11.98    0.72
  13  -5   0   36.95    1.07
  13  -4  -4   -0.39    0.57
  14  -6  -2    1.40    0.71
  15 -10  -4    3.12    0.53
   8  -8   9    2.95    0.84
   8  -4   7   27.10    0.97
  10  -8   7    2.29    0.73
  11  -4   3   29.58    0.90
  11  -2  -2   42.00    0.70
  12  -4   1    1.72    0.75
  13 -10   3    1.42    0.56
  13  -7   2   81.23    1.14
  14  -6  -5   10.27    0.69
   9  -8   8   16.58    0.86
  11  -5   4   13.15    0.85
  12  -6   3    2.83    0.94
  13  -6   1   23.50    0.90
  14  -7  -1  134.73    1.31
  14  -6  -4    1.41    0.67
   5  -2   7   46.29    0.78
   8  -9   9    7.73    0.76
   8  -6   8   26.72    1.18
   9  -1   0  275.15    1.25
  10 -10   7   13.91    0.70
  10  -9   7   24.24    0.82
  10  -2   1   16.77    0.62
  11  -3   1   74.92    0.99
  12  -8   4   33.37    0.87
  12  -5   2    0.85    0.78
   8 -10   9    0.46    0.56
   9 -10   8    0.17    0.62
   9  -6   7   10.69    0.88
  11  -7   5   45.70    0.99
  12  -4   0    6.99    0.74
  13  -8   2   20.15    0.81
  14  -8  -1    9.46    0.85
  14  -7  -2   38.50    0.90
   5  -3   8  235.65    1.52
   8  -2   4   19.64    0.63
  10  -5   5  207.00    1.57
  10  -4   4    5.10    0.75
  12  -9   4   20.16    0.80
  13  -9   2   68.05    1.06
  13  -6   0   18.56    0.87
  13  -5  -2   83.32    1.08
  14  -7  -3   17.05    0.85
   6  -2   6   53.22    0.77
   7  -5   8    2.39    1.13
   7  -1   3    4.83    0.44
   9  -3   4  149.72    1.22
  10  -2   0    5.77    0.52
  11  -8   5    0.63    0.81
  11  -6   4    5.48    0.95
  11  -4   2    0.80    0.71
  11  -3   0   51.06    0.85
  13 -10   2    3.18    0.64
  13  -5  -5    3.11    0.65
  14  -9  -1   24.07    0.81
  14  -7  -4   94.04    1.06
   6  -4   8   19.86    0.96
   6  -3   7    3.31    0.76
   8  -5   7    7.61    0.87
  12  -6   2   13.85    0.86
  12  -5   1  158.34    1.39
  13  -5  -4   37.93    0.78
  14 -10  -1    5.21    0.62
  14  -8  -2   29.16    0.85
   7  -3   6  168.76    1.30
   8  -7   8   21.01    0.96
   8  -3   5   72.02    0.96
  10  -3   2    5.11    0.63
  11  -9   5   10.32    0.82
  13  -8   1    5.58    0.76
  14  -8  -3    1.97    0.73
  10  -6   5   14.38    0.98
  10  -2  -4  119.88    0.82
  10  -2  -2   61.67    0.70
  11 -10   5   28.77    0.78
  11  -3  -5   38.41    0.63
  12  -8   3    5.09    0.76
  12  -4  -5   26.78    0.64
  12  -4  -2  177.15    1.30
  13  -7   0  135.50    1.35
  14 -11  -2    2.18    0.58
  14 -10  -2   21.29    0.76
  14  -9  -2   34.57    0.86
  14  -8  -4   39.54    0.87
   7  -8   9    8.41    0.94
   8  -2   3    3.30    0.48
  10  -2  -3    1.40    0.39
  11  -7   4   27.12    0.92
  11  -4   1    6.98    0.71
  12  -5   0  198.14    1.48
  12  -4  -3    6.29    0.61
  13  -9   1    1.83    0.69
  13  -6  -2    3.77    0.83
   5  -5   9    0.85    1.15
   8  -8   8   20.36    0.91
   9  -2   1    4.40    0.47
  10  -5   4    8.07    0.79
  11  -3  -4   86.08    0.80
  12 -11   3    1.29    0.63
  12  -7   2    7.81    0.82
  13 -11   1   12.21    0.63
  13 -10   1   59.22    0.96
  14 -11  -3   26.31    0.67
  14  -9  -4    4.19    0.66
   7  -9   9    4.23    0.88
   7  -2   4   93.78    0.90
   8  -6   7    5.14    0.99
  10 -11   6    2.44    0.58
  10  -3   1  133.03    1.08
  12 -10   3   11.29    0.71
  12  -6   1    7.53    0.81
  13  -8   0   15.34    0.82
  13  -6  -4   15.59    0.75
  13  -6  -3    2.51    0.68
  14 -11  -4    7.20    0.55
  14 -10  -5    0.71    0.56
  14 -10  -4    9.03    0.62
   7 -11   9    0.15    0.57
   7 -10   9   10.70    0.76
   8  -9   8   22.59    0.87
   9 -11   7   28.51    0.77
   9  -9   7   46.39    0.96
  10  -7   5    3.34    0.93
  11  -8   4    2.25    0.75
   8 -11   8    1.40    0.60
   8 -10   8    4.70    0.71
   8  -3   4    0.67    0.55
   9 -10   7   38.41    0.86
   9  -4   4    0.78    0.65
  12  -8   2  120.06    1.29
  13  -9   0   26.16    0.83
  10  -4   2   17.58    0.72
  10  -3   0    0.80    0.51
  11 -12   4    6.50    0.59
  11  -9   4   10.48    0.76
  12  -6   0   66.52    1.15
  13 -11   0   17.14    0.70
  13 -10   0   17.23    0.79
  13  -7  -2    7.07    0.73
   6  -4   7    5.63    0.85
   7  -7   8   37.86    1.19
   8  -4   5   11.94    0.71
  10  -8   5   26.87    1.02
  11 -11   4    2.49    0.64
  11 -10   4    3.64    0.66
  12 -12   2    6.35    0.58
  12  -9   2    2.40    0.73
  12  -7   1    2.25    0.79
  13  -7  -3    2.87    0.81
   7  -4   6   88.96    1.07
   8  -7   7   20.04    0.90
  10  -5   3   16.92    0.79
  11  -6   2   10.27    0.81
  11  -5   1   -0.23    0.69
  12 -11   2    4.29    0.66
  12 -10   2   14.71    0.74
  12  -5  -5   18.86    0.62
  12  -5  -4    0.69    0.64
  13 -12  -1    2.47    0.58
  13  -7  -5    9.49    0.69
  13  -7  -4   17.37    0.77
  10 -12   5   33.23    0.78
  10  -9   5    5.01    0.87
   7  -2   3  358.05    1.40
   9  -6   5  165.05    1.42
  11  -8   3   76.74    1.14
  11  -4  -5   91.13    0.85
  11  -4  -2    6.26    0.57
  12  -8   1   23.04    0.90
   6  -6   8    7.12    1.10
   7  -8   8    8.81    0.87
   8  -8   7   31.30    0.94
   8  -2   1   18.77    0.49
   9  -5   4   82.49    1.06
  10 -11   5   16.15    0.73
  10 -10   5    5.49    0.72
  10  -4   1    0.45    0.59
  10  -3  -2    1.21    0.43
  11  -5   0   69.99    0.99
  12  -7   0    1.51    0.77
  13 -12  -2   28.18    0.67
  13  -9  -2   18.47    0.77
  13  -8  -3    1.22    0.68
   6  -9   9  213.36    1.70
   7  -6   7   29.60    0.97
   9 -12   6    0.85    0.57
   9  -3   1   93.28    0.87
  11 -12   3    3.91    0.64
  11  -9   3    5.75    0.78
  11  -7   2   89.32    1.18
  12 -12   1    1.39    0.59
  12  -9   1   23.14    0.87
  12  -6  -2   74.65    1.03
  13 -11  -2   17.05    0.70
  13 -10  -2    5.19    0.69
  13  -8  -5   14.51    0.67
  13  -8  -4   13.36    0.72
   5  -5   8    3.07    0.95
   6 -10   9    2.37    0.74
   7  -9   8   36.90    1.07
   8 -12   7   12.73    0.68
   8  -9   7    9.24    0.80
   9 -11   6   39.70    0.87
  10  -6   3  126.90    1.27
  10  -5   2   -0.53    0.67
  11 -11   3    0.18    0.64
  11 -10   3   12.20    0.76
  11  -6   1   44.33    0.95
  12 -10   1   10.02    0.75
  13 -12  -3   49.22    0.79
  13  -9  -3   14.10    0.75
   7 -12   8   14.75    0.63
   7 -10   8   89.93    1.22
   7  -3   4   11.13    0.54
   8 -11   7   22.21    0.83
   8 -10   7   28.24    0.95
   8  -5   5   28.77    0.84
   9  -7   5   10.31    0.83
  10  -8   4   52.85    1.04
  12  -8   0  260.17    1.71
  12  -6  -5   48.01    0.82
  12  -6  -4   15.55    0.72
  13 -12  -5    1.78    0.53
  13 -11  -3    6.20    0.68
  13 -10  -3   68.94    0.97
  13  -9  -5    3.72    0.65
  13  -9  -4   59.51    0.92
   7 -11   8    2.39    0.68
   7  -5   6   10.01    0.76
  10 -13   4   -0.12    0.50
  10  -4   0   16.11    0.64
  11  -8   2   18.32    1.02
  13 -11  -4    2.11    0.62
  13 -10  -5   24.60    0.74
   6  -7   8    0.85    1.05
   8  -7   6    9.43    0.82
   9  -3   0   68.20    0.74
  10  -9   4    0.01    0.75
  11 -13   2   21.47    0.66
  12 -12   0    5.03    0.70
  12  -9   0   64.74    1.07
  13 -11  -5   10.77    0.57
   9  -8   5   16.52    0.86
   9  -6   4    9.30    0.77
   9  -5   3   68.42    0.96
  10 -12   4    1.72    0.62
  10 -10   4   25.75    0.97
  10  -7   3   72.05    1.10
  10  -5   1  125.57    1.21
  11  -7   1   89.26    1.17
  11  -6   0    8.67    0.75
  12 -11   0    3.62    0.67
  12 -10   0   14.98    0.79
  10 -11   4   -0.09    0.65
  10  -6   2    1.93    0.72
  11 -12   2    0.29    0.64
  11  -9   2   18.50    0.88
  11  -5  -3   20.80    0.74
  12  -7  -3   17.65    0.86
   8  -8   6    5.26    0.94
   8  -6   5   48.59    0.97
  11 -11   2   97.64    1.12
  11  -5  -5   42.11    0.67
  11  -5  -4   10.96    0.62
  12  -7  -5   69.28    0.94
  12  -7  -4   23.27    0.79
   3  -4   8    2.74    0.66
   7  -8   7   10.72    0.99
   8 -13   6    5.78    0.64
   8  -4   3   59.54    0.80
  10  -8   3    3.20    0.80
  10  -4  -2  156.47    1.06
  11  -8   1    5.10    0.81
  12  -8  -2   40.04    0.92
   7 -13   7    7.73    0.61
   7  -6   6   44.67    0.97
   8  -5   4   18.44    0.72
   9 -11   5   15.79    0.76
   9 -10   5   10.47    0.79
   9  -7   4    2.81    0.77
   9  -4   1   83.76    0.87
   9  -3  -2   31.46    0.53
  10 -13   3   22.94    0.69
  11  -7   0  259.08    1.65
   5 -10   9   93.65    1.15
   8  -9   6    2.54    0.78
   8  -3   1  126.92    0.89
  10  -9   3   28.22    1.06
  10  -5   0  134.48    1.13
  10  -4  -4   19.84    0.50
  11  -9   1    6.26    0.96
  12  -9  -2   78.35    1.08
  12  -8  -3   50.47    0.93
   5 -11   9    1.33    0.59
   6 -12   8   37.08    0.82
   6  -9   8   27.99    0.94
   6  -3   4   75.01    0.75
   7 -12   7   19.70    0.79
   7  -9   7    8.16    0.82
   7  -4   4    1.77    0.51
   8 -11   6    1.05    0.68
   8 -10   6   52.59    1.00
   9  -6   3   34.03    0.86
   9  -5   2  181.95    1.26
  10 -12   3    0.47    0.67
  10  -7   2   30.73    0.91
  10  -6   1   86.69    1.06
  11 -12   1    1.91    0.68
  12 -13  -3   41.11    0.74
  12 -12  -2   20.40    0.74
  12 -10  -2   76.70    1.14
  12  -8  -5   16.59    0.75
  12  -8  -4  102.67    1.12
   6 -11   8   13.33    0.85
   6 -10   8   64.89    1.09
   6  -5   6   21.56    0.75
   7 -11   7   28.92    0.94
  10 -11   3    0.31    0.70
  10 -10   3   14.03    0.84
  11 -11   1   -0.29    0.69
  11 -10   1  214.68    1.58
  11  -8   0   75.91    1.22
  12 -13  -4    3.48    0.56
  12 -11  -2    2.43    0.67
   7  -7   6    3.66    0.92
   9  -4   0  115.41    0.93
  11 -13   0   17.53    0.73
  11  -6  -3   48.25    0.82
  12 -13  -5   18.91    0.57
   7  -3   2  358.32    1.35
   8  -6   4  107.44    1.12
   8  -4   2  130.84    0.97
   8  -3   0  109.56    0.80
   9  -9   4  124.05    1.39
  10  -8   2   43.48    0.99
  11  -6  -5  127.90    0.99
  11  -6  -4    3.19    0.55
  12 -12  -4    8.02    0.65
  12 -11  -3   63.09    0.96
  12 -10  -3   61.50    0.97
  12  -9  -5  118.73    1.13
  12  -9  -4   25.42    0.76
   8  -8   5    5.28    0.80
   9 -12   4    0.36    0.64
   9  -7   3    6.64    0.76
  10 -13   2    0.56    0.63
  10  -6   0   59.10    0.92
  11 -12   0    6.98    0.78
  11  -9   0  145.50    1.37
  12 -12  -5    2.15    0.53
  12 -10  -5   12.60    0.73
  12 -10  -4    2.97    0.68
   6 -14   7    0.63    0.47
   9 -11   4    1.86    0.73
   9 -10   4    3.75    0.77
   9  -5   1    1.75    0.56
  10  -9   2   43.46    1.00
  10  -7   1    3.74    0.74
  10  -5  -2  152.56    1.09
  11 -11   0   11.49    0.77
  11 -10   0    5.61    0.79
  12 -11  -5   19.24    0.67
   4  -6   8    5.16    0.89
   5  -8   8    0.30    0.93
   7  -8   6    3.82    0.77
   9 -14   3    1.78    0.56
  10 -14   1    1.06    0.54
  10 -12   2   26.47    0.80
  10 -10   2   65.48    1.09
  11 -14  -2   10.37    0.61
   4  -9   9  124.23    1.29
   6  -8   7   22.85    0.90
   6  -6   6   74.11    1.02
   7 -13   6   18.89    0.77
   7  -5   4    6.88    0.57
  10 -11   2    1.18    0.74
  10  -5  -5   65.97    0.74
  10  -5  -3    4.38    0.50
  11  -7  -3   79.85    0.97
   4 -10   9   -0.46    0.73
   6 -13   7   24.68    0.71
   7  -9   6    4.95    0.90
   8  -7   4    6.25    0.73
   9  -8   3   52.63    1.00
   9  -4  -2    7.00    0.43
  10  -8   1    6.81    0.80
  11 -14  -3   30.99    0.69
  11  -8  -2  258.67    1.59
  11  -7  -6    5.32    0.51
  11  -7  -5  105.78    0.99
  11  -7  -4  300.51    1.53
   5  -9   8  160.62    1.45
   6  -9   7  124.67    1.39
   7 -12   6    1.67    0.69
   9 -13   3    5.48    0.68
   9  -5   0  215.38    1.25
  10 -13   1    1.98    0.68
  10  -7   0    3.71    0.71
  11 -13  -2   40.04    0.83
   5 -12   8    0.67    0.64
   5 -11   8   49.20    1.01
   5 -10   8   13.11    0.90
   6 -12   7   31.15    0.85
   6  -4   4   25.20    0.56
   7 -11   6   47.19    0.95
   7 -10   6   18.67    0.84
   8 -14   4   24.91    0.69
   8  -6   3   56.15    0.87
   8  -5   2  227.31    1.27
   9 -12   3    4.40    0.82
   9  -9   3   28.42    0.92
   9  -7   2    1.94    0.70
   9  -4  -3   26.71    0.51
  10  -9   1    5.69    0.80
  11 -14  -4    1.63    0.49
  11  -9  -2    5.18    0.86
  11  -8  -3   22.61    0.85
   5  -4   5   18.24    0.54
   6 -10   7    6.74    0.78
   8  -8   4  124.08    1.26
   9 -11   3   21.94    0.86
   9 -10   3   56.31    1.05
   9  -6   1    2.41    0.61
  10 -14   0   37.68    0.75
  10 -12   1   12.23    0.75
  10 -10   1   11.75    0.97
  10  -6  -2    3.21    0.59
  11 -13  -3   -0.32    0.65
  11 -12  -2    1.36    0.66
   6  -7   6   16.43    0.79
   8 -13   4   10.15    0.76
   9 -14   2    2.70    0.58
  10 -11   1    4.53    0.77
  10  -8   0  549.18    2.24
  11 -11  -2  144.15    1.28
  11  -8  -4  157.81    1.20
   7  -4   2   24.63    0.53
   9  -8   2    8.73    0.90
   9  -5  -1  169.81    1.09
  10 -13   0    5.73    0.75
  10  -6  -3  114.37    0.99
  11  -9  -3   34.25    0.84
   6 -14   6   11.62    0.63
   7  -6   4   28.73    0.75
   7  -5   3   27.29    0.62
   8  -9   4   11.03    0.81
   9 -13   2   22.02    0.85
  10  -6  -6  320.95    1.32
  11 -13  -5    1.15    0.54
  11 -11  -3   13.13    0.84
  11 -10  -3   94.67    1.09
  11  -9  -4   82.08    1.06
   8 -11   4    0.34    0.74
   8  -7   3    8.51    0.71
   9  -7   1    1.45    0.67
   9  -6   0    2.50    0.58
  10  -9   0    1.03    0.76
  10  -6  -5    0.73    0.42
  10  -6  -4   34.48    0.65
  11 -12  -6    0.67    0.61
  11 -12  -4   -0.07    0.61
  11  -9  -6   14.77    0.59
  11  -9  -5    1.18    0.66
   3  -9   9   51.59    0.96
   5  -8   7    3.90    0.90
   6  -8   6   12.42    0.79
   7 -15   4   32.04    0.67
   8 -14   3    2.00    0.61
   8  -6   2   38.50    0.75
   9  -9   2   52.91    1.01
   9  -5  -2   30.22    0.60
  10 -11   0    6.03    0.77
  10 -10   0   15.80    0.84
  10  -8  -1   57.91    0.98
  10  -7  -2  125.82    1.12
  11 -11  -4   33.99    0.81
  11 -10  -6    5.62    0.62
  11 -10  -5   35.88    0.85
  11 -10  -4    4.77    0.65
   4 -13   8   12.69    0.62
   5 -13   7   19.20    0.76
   5  -6   6   62.60    0.89
   6 -13   6   19.58    0.77
   6  -4   3   18.54    0.49
   8  -4  -1    0.39    0.38
   9 -15   0    6.45    0.61
   9 -14   1    7.77    0.67
   9 -10   2    0.17    0.78
  10 -14  -2    1.84    0.62
  10 -13  -1   65.62    1.02
  11 -11  -5    0.35    0.62
   3 -11   9    0.11    0.60
   4  -9   8    1.43    0.88
   6 -15   5   26.27    0.66
   6  -9   6    8.29    0.81
   6  -5   4  151.58    1.04
   7  -7   4   21.51    0.75
   8 -15   2    0.96    0.56
   8  -8   3    0.02    0.71
   9  -5  -3   58.04    0.71
  10  -7  -3   85.28    1.00
   4 -15   7   11.40    0.50
   5 -15   6   19.84    0.57
   5 -12   7   61.69    1.03
   5  -9   7   76.56    1.10
   6 -12   6   45.45    0.91
   9  -8   1  187.87    1.40
   9  -6  -1   27.42    0.67
  10 -12  -1    0.94    0.70
  10  -9  -1    9.75    0.79
   4 -11   8   48.97    0.93
   4 -10   8  207.94    1.52
   4  -5   6    9.23    0.57
   5 -11   7    3.09    0.85
   5 -10   7  272.67    1.75
   6 -11   6  154.82    1.35
   6 -10   6   16.20    0.81
   7 -14   4    2.31    0.63
   8  -9   3   79.34    1.10
   9  -7   0   62.66    0.91
   9  -5  -5   83.46    0.73
  10 -14  -3   16.88    0.67
  10 -11  -1   18.67    0.83
  10 -10  -1    4.31    0.77
  10  -7  -6   98.13    0.87
  10  -7  -4  164.35    1.14
   7  -6   3  399.96    1.66
   7  -5   2   46.96    0.66
   8 -12   3    2.59    0.74
   8  -7   2    6.96    0.67
   8  -5   0  101.23    0.85
   9 -15  -1    7.38    0.58
   9 -14   0    5.47    0.71
   9 -12   1    2.46    0.88
   9  -9   1   83.37    1.12
  10 -14  -4   35.17    0.75
  10  -7  -5   20.63    0.58
   3 -14   8    2.53    0.54
   5  -7   6  272.62    1.57
   6 -14   5    4.84    0.68
   7 -15   3    0.93    0.55
   7 -13   4   15.02    0.85
   7  -8   4    5.62    0.71
   8 -11   3   93.78    1.18
   8 -10   3   13.99    0.84
   9 -10   1    4.26    0.80
  10 -14  -5    4.16    0.61
  10  -8  -3   17.49    0.70
   5 -14   6    5.47    0.67
   8 -15   1   57.82    0.84
  10 -13  -3   27.49    0.80
   7 -12   4   29.52    1.00
   7  -9   4  161.93    1.34
   8  -8   2   30.92    0.83
   9 -13   0    8.69    0.72
   9  -7  -1   83.29    0.95
   6  -5   3  305.13    1.31
   7 -11   4   44.39    0.97
   7 -10   4    0.97    0.75
   7  -7   3   30.68    0.75
   8 -13   2    0.75    0.69
   8  -5  -1  947.53    2.20
   9 -14  -1    7.07    0.67
   9  -6  -3   69.92    0.82
  10 -13  -6    0.55    0.58
  10 -13  -5   10.32    0.68
  10 -13  -4    0.60    0.62
  10 -12  -3    5.79    0.68
  10  -9  -3   62.44    0.93
  10  -8  -6  160.14    1.05
  10  -8  -5    6.32    0.54
   5 -13   6   57.83    1.02
   7 -14   3    4.23    0.64
   9 -15  -3    9.71    0.62
   9 -12   0    5.49    0.77
  10 -10  -3   44.03    0.88
  10  -9  -4  101.26    1.10
   5 -15   5    1.14    0.60
   7  -6   2    1.23    0.50
   7  -5   1  152.11    0.95
   8 -14   1    6.64    0.66
   8  -9   2   27.40    0.86
   8  -7   1  812.66    2.38
   8  -6   0  340.30    1.47
   9  -6  -6  159.99    0.94
   9  -6  -4   40.61    0.62
  10 -12  -4   31.09    0.80
  10  -9  -6    1.16    0.58
  10  -9  -5   63.69    0.90
   3 -15   7    9.31    0.52
   3  -9   8   40.54    0.94
   4 -15   6   11.42    0.61
   5  -9   6  110.98    1.24
   7 -16   1   18.54    0.60
   8 -11   2   12.84    0.84
   8 -10   2   37.73    0.94
   8  -5  -2  325.79    1.31
   9 -15  -4    9.72    0.57
   9 -13  -1    1.88    0.68
   9  -8  -1  328.79    1.66
   9  -6  -5  133.44    0.88
  10 -10  -4   94.36    1.03
   3 -11   8  282.37    1.63
   3 -10   8    2.85    0.73
   4 -12   7   14.52    0.75
   5 -12   6    1.31    0.70
   6 -14   4    8.59    0.78
   6  -7   4    4.09    0.59
   7 -13   3   13.27    0.77
   7  -8   3   37.53    0.83
  10 -11  -6   11.46    0.63
  10 -11  -5  140.52    1.16
  10 -10  -6   24.87    0.67
  10 -10  -5   38.49    0.74
   4 -11   7   66.71    1.02
   4 -10   7   51.21    0.96
   5 -11   6   55.11    0.98
   5 -10   6    0.25    0.71
   8 -13   1   29.66    0.86
   8  -8   1   37.37    0.83
   9 -12  -1   62.56    1.02
   2 -14   8    1.58    0.51
   4 -16   5    2.92    0.49
   7 -12   3    4.40    0.78
   7  -9   3    3.00    0.72
   8 -15  -1    2.36    0.67
   8  -6  -1  153.06    1.06
   9 -14  -3   34.89    0.80
   9 -11  -1   35.17    0.92
   9 -10  -1   71.46    1.05
   5 -14   5   16.05    0.73
   6 -15   3    5.27    0.65
   6 -13   4   91.90    1.20
   6  -6   3  240.31    1.24
   7 -16   0   11.21    0.64
   7 -14   2   -0.80    0.64
   7 -11   3   11.40    0.82
   7 -10   3   15.24    0.82
   7  -7   2   21.58    0.66
   8 -14   0   50.42    0.89
   8 -12   1    1.53    0.77
   4 -14   6   50.67    0.86
   4  -7   6   17.28    0.67
   6 -16   2   39.06    0.73
   6  -8   4   10.42    0.68
   6  -5   2   -0.25    0.39
   7 -15   1    5.62    0.64
   7  -5   0  228.14    1.09
   8 -11   1    2.84    0.78
   9  -7  -4   85.26    0.84
   7  -6   1  514.71    1.71
   9  -7  -5  191.07    1.08
   6 -12   4    7.67    0.78
   6  -9   4   27.29    0.81
   2 -15   7   10.32    0.56
   4 -13   6    1.66    0.66
   6 -14   3    0.44    0.67
   6 -11   4   40.23    0.94
   6 -10   4   39.80    0.91
   7 -16  -1   14.74    0.66
   7  -8   2   40.42    0.80
   8 -14  -1    0.98    0.65
   8  -7  -1  124.21    1.00
   9 -13  -4   15.12    0.72
   9 -12  -3   34.89    0.84
   9  -9  -3  176.01    1.32
   9  -8  -4    0.52    0.62
   2  -9   8   21.71    0.87
   7 -12   2   30.53    0.91
   8 -12   0    4.92    0.78
   9 -13  -5   16.97    0.71
   9 -10  -3   80.78    1.09
   9  -8  -5   44.70    0.73
   2 -11   8    0.14    0.69
   4 -12   6  106.58    1.25
   6 -16   1    0.80    0.57
   6 -15   2   -0.20    0.62
   7 -11   2   87.36    1.13
   7  -9   2  127.32    1.17
   7  -7   1  260.26    1.33
   8 -11   0    4.14    0.78
   8 -10   0   65.38    1.02
   8  -6  -3   31.98    0.61
   9 -12  -4    8.86    0.70
   9  -8  -6    2.56    0.47
   2 -10   8  199.06    1.36
   3  -9   7   15.18    0.74
   4  -9   6    8.11    0.69
   6  -6   2  292.56    1.29
   7 -10   2   41.40    0.92
   7  -6   0   24.50    0.55
   8 -15  -5    2.81    0.60
   8 -15  -4    0.33    0.58
   8 -13  -1   25.27    0.84
   9 -11  -4   30.31    0.88
   9  -9  -4   30.81    0.73
   3 -16   5   29.63    0.64
   3 -10   7    3.25    0.68
   4 -11   6   16.95    0.82
   4 -10   6    6.79    0.71
   5  -7   4   84.49    0.87
   6  -8   3   15.63    0.66
   9 -11  -7   -1.40    0.52
   9 -10  -4  193.21    1.30
   9  -9  -6   47.04    0.75
   9  -9  -5  266.21    1.36
   2 -14   7    4.14    0.63
   5 -15   3    1.38    0.72
   6 -12   3  102.58    1.28
   7 -16  -3   14.59    0.65
   8 -14  -3   -0.67    0.72
   8 -12  -1   24.64    0.86
   8  -6  -4   25.11    0.50
   9 -11  -6   38.05    0.76
   9 -10  -5   92.71    0.94
   3 -14   6    6.20    0.66
   5 -16   2   11.14    0.64
   5 -13   4    4.99    0.75
   6 -16   0    7.39    0.60
   6  -9   3  131.60    1.16
   7 -15  -1    0.37    0.62
   7 -14   0   -0.61    0.67
   7  -8   1  262.99    1.42
   8 -11  -1  247.93    1.58
   8  -6  -5    6.54    0.40
   6 -11   3   74.80    1.07
   6 -10   3   44.81    0.91
   7 -16  -4    6.51    0.55
   7 -12   1    6.77    0.79
   8 -14  -4   12.05    0.77
   8 -10  -1    0.85    0.69
   6  -7   2    3.14    0.49
   7 -16  -5    3.03    0.51
   7 -11   1   19.51    0.84
   7 -10   1    9.87    0.75
   7  -6  -1   36.19    0.58
   1  -8   8    1.48    0.73
   5 -12   4   42.03    0.94
   6 -13   2    7.55    0.78
   8 -13  -3   31.82    0.82
   1 -12   8   -0.14    0.62
   5 -11   4  192.79    1.43
   5 -10   4   87.42    1.13
   5  -9   4   74.09    0.95
   6 -16  -1   11.45    0.65
   7 -14  -1    0.42    0.68
   8  -7  -4   93.13    0.80
   1 -16   6    0.26    0.52
   1  -9   8    4.90    0.70
   5 -16   1   43.66    0.81
   6  -8   2  146.53    1.09
   7 -15  -3    2.21    0.69
   8 -13  -4   23.07    0.76
   8  -8  -3  124.43    0.99
   8  -7  -6    8.65    0.46
   8  -7  -5    5.72    0.46
   1 -11   8   51.54    0.81
   1 -10   8    8.05    0.69
   3 -12   6    5.69    0.73
   4  -9   5  257.87    1.46
   5 -17  -1   -0.01    0.54
   6 -15   0    0.39    0.63
   6 -12   2   13.01    0.82
   8 -13  -5   15.92    0.74
   2 -11   7    5.30    0.74
   2  -9   7    4.29    0.71
   3 -11   6    6.30    0.84
   3  -9   6   11.45    0.78
   4 -17   1    1.62    0.51
   4 -10   5   65.19    0.96
   5 -13   3   10.77    0.79
   5  -7   3   17.37    0.55
   6 -11   2   32.36    0.89
   6  -9   2    1.74    0.63
   7 -15  -4    3.57    0.65
   7 -13  -1    3.54    0.87
   7 -11   0  260.13    1.60
   7  -9   0   12.14    0.68
   7  -7  -1   21.77    0.57
   8 -11  -3   21.98    0.78
   8 -10  -3   38.41    0.90
   8  -9  -3   24.53    0.70
   8  -8  -4    2.66    0.56
   2 -14   6   31.42    0.83
   2 -10   7   12.24    0.70
   3 -10   6    0.67    0.65
   6 -10   2    1.95    0.69
   7 -10   0    0.82    0.69
   4 -16   2   50.95    0.87
   4 -15   3   28.62    0.79
   5 -17  -2   47.09    0.72
   5 -16   0    4.36    0.68
   6 -15  -1   38.36    0.93
   6  -7   1  184.88    1.08
   8 -12  -7   17.34    0.64
   8 -12  -6   42.41    0.85
   8 -11  -4   67.42    0.92
   8  -9  -4   66.06    0.84
   8  -8  -6   93.61    0.82
   8  -8  -5  175.10    1.05
   0 -13   8    9.44    0.58
   3 -17   2    5.25    0.58
   5 -15   1    2.61    0.78
   5 -14   2    0.70    0.72
   5 -12   3   10.37    0.80
   7 -14  -3    3.57    0.68
   7 -12  -1  107.47    1.18
   8 -11  -7   13.18    0.64
   8 -10  -4   60.43    0.86
   4 -17   0    4.32    0.59
   6 -16  -5    7.86    0.61
   6 -16  -4   11.28    0.62
   8 -11  -5   67.22    0.88
   8 -10  -5   93.12    0.97
   8  -9  -6    0.28    0.52
   8  -9  -5   27.39    0.63
   1 -15   6    9.67    0.61
   1 -13   7    3.80    0.63
   2 -15   5    5.66    0.64
   2 -13   6   14.15    0.82
   3 -13   5    1.25    0.70
   5 -10   3    4.60    0.68
   6  -8   1  217.17    1.23
   7 -14  -4    0.64    0.63
   7 -11  -1   92.58    1.09
   7 -10  -1    5.53    0.68
   7  -9  -1   71.21    0.90
   8 -10  -6    8.01    0.54
   3  -7   5    6.58    0.48
   4 -14   3    3.79    0.73
   5 -13   2    4.65    0.90
   6 -15  -2    3.33    0.64
   6 -11   1   15.89    0.79
   7 -14  -6   53.07    0.91
   7 -14  -5    3.44    0.65
   1 -17   4    1.17    0.48
   4 -16   1   17.50    0.71
   6 -14  -1    1.68    0.70
   6 -13   0   34.61    0.91
   6 -10   1    1.26    0.66
   7 -13  -3   20.36    0.78
   7 -12  -2   39.02    0.89
   0 -11   8    3.04    0.61
   1 -12   7    5.64    0.59
   2 -12   6    9.87    0.83
   3 -17   1    4.65    0.60
   4 -17  -1    3.41    0.55
   5 -15   0    1.31    0.66
   5 -14   1   30.39    0.87
   7 -11  -2   30.50    0.93
   7  -7  -3   99.75    0.79
   0 -10   8   65.99    0.85
   5 -16  -2    7.32    0.64
   5 -12   2   27.12    0.86
   6 -12   0  272.14    1.68
   7 -13  -4    1.67    0.64
   1 -14   6    4.60    0.64
   1 -11   7   31.77    0.74
   2 -14   5    1.38    0.64
   2 -11   6   10.00    0.82
   3 -15   3    0.17    0.77
   3 -11   5    1.30    0.68
   3  -9   5   98.38    0.96
   4 -13   3   23.26    0.84
   5  -8   2    5.85    0.51
   6 -14  -2   44.38    0.97
   7 -13  -6    2.74    0.71
  -1 -15   7    0.17    0.48
   1 -10   7    7.31    0.67
   2 -17   2   11.38    0.61
   4 -17  -2   17.12    0.61
   5 -11   2   18.40    0.78
   6 -15  -6   15.96    0.73
   6 -13  -1  104.21    1.15
   6 -11   0   17.79    0.77
   7  -8  -3  203.31    1.12
   7  -7  -4    2.38    0.38
   5 -16  -7    0.49    0.49
   5 -15  -1   49.44    0.89
   5 -13   1   24.35    0.85
   5 -10   2   35.03    0.79
   5  -9   2   33.60    0.71
   6 -10   0   86.69    0.98
   7 -11  -3    6.80    0.66
   7  -9  -3   38.47    0.77
  -1 -16   6    6.07    0.53
   0 -15   6    0.85    0.55
   1 -15   5    3.30    0.68
   2 -16   3    2.94    0.65
   3 -17   0    5.28    0.59
   4 -15   1    7.63    0.71
   4 -12   3   84.02    1.06
   7 -12  -7    8.86    0.65
   7 -12  -5    2.83    0.72
   7  -7  -5   45.47    0.55
   0 -17   4   14.71    0.54
   0 -16   5    3.85    0.57
   1 -16   4   18.50    0.69
   1 -13   6    4.84    0.72
   2 -13   5    8.58    0.71
   4 -17  -4    9.14    0.59
   5 -16  -6    7.39    0.55
   6 -12  -1    8.23    0.74
   6  -7  -1  174.61    0.97
   7 -11  -4   12.85    0.65
   7  -8  -4  225.00    1.13
   7  -7  -6  312.36    1.15
   3 -14   3  302.53    1.76
   4  -8   3   37.80    0.64
   5 -15  -2  150.54    1.23
   5 -12   1    8.20    0.75
   6 -14  -4    3.24    0.64
   6 -13  -2    4.93    0.75
   7 -10  -4   15.49    0.61
   7  -9  -4  366.21    1.49
   2 -17   1    2.18    0.59
   3 -17  -1    4.88    0.63
   3 -16   1    2.11    0.61
   3 -15   2   49.20    1.00
   4 -13   2   42.44    0.92
   6 -14  -5   -0.32    0.71
   7 -11  -6   13.52    0.67
   7  -8  -5   27.64    0.52
   2 -12   5   50.00    1.01
   4 -15   0    3.65    0.81
   5 -14  -1  174.29    1.35
   5 -13   0  141.04    1.26
   5 -11   1   11.05    0.71
   6 -10  -1   10.75    0.64
   6  -9  -1  154.15    1.07
   7 -10  -7   13.50    0.56
   7 -10  -5    3.23    0.51
   7  -9  -5    0.97    0.45
   0 -14   6    3.21    0.69
   1 -12   6   36.79    0.79
   5 -10   1    4.02    0.61
   6 -12  -2    2.75    0.68
   7 -10  -6   33.45    0.63
   7  -9  -7   18.91    0.50
   7  -9  -6  167.91    0.98
   1 -17   2    2.73    0.54
   1 -14   5    4.47    0.65
   3 -17  -2    8.22    0.59
   5  -9   1   93.66    0.88
  -1 -15   6    2.27    0.59
   0 -11   7   36.38    0.72
   2 -11   5    5.29    0.65
   3 -13   3    9.66    0.75
   4 -12   2   75.21    1.01
   5 -14  -2   22.23    0.90
   5 -12   0   81.94    1.03
   6 -13  -4    7.03    0.66
   6 -11  -2    4.11    0.64
  -1 -17   4    4.69    0.49
   0 -15   5    8.86    0.70
   0 -10   7   21.56    0.68
   1 -11   6  100.48    1.02
   2 -17   0   -0.06    0.55
   2 -10   5    3.44    0.68
   2  -8   5   54.39    0.68
   5 -15  -5    7.19    0.66
   5 -13  -1   25.53    0.82
   6 -13  -5    1.99    0.62
   6 -10  -2  367.01    1.62
   0  -9   7    4.60    0.51
   1 -10   6   39.62    0.76
   1  -8   6    2.30    0.45
   2  -9   5  187.24    1.14
   3 -17  -4    4.03    0.57
   3 -15   1    2.18    0.69
   4 -16  -6   22.32    0.68
   4 -16  -4   11.66    0.65
   4 -11   2    4.07    0.65
   6  -9  -2    0.54    0.50
   0 -13   6    5.80    0.71
   1 -13   5   -0.88    0.73
   3 -17  -5    0.37    0.48
   3 -12   3   87.89    1.04
   4 -16  -5   -0.34    0.57
   5 -11   0  377.74    1.70
   6 -12  -4    5.06    0.63
   6  -7  -3  213.50    1.00
  -2 -14   7   -0.29    0.58
   1 -17   1    0.76    0.56
   2 -17  -1   37.14    0.75
   2 -16   1    9.54    0.66
   3 -16  -1   53.38    0.86
   4  -9   2   21.73    0.59
   5 -10   0  109.39    0.98
   5  -8   0    0.78    0.42
   2 -14   3    0.10    0.71
   4 -15  -2    1.29    0.65
   5 -14  -4   -0.37    0.73
   5 -13  -2    7.60    0.70
   5 -12  -1   13.36    0.72
   5  -9   0    5.03    0.51
   6 -12  -7    2.86    0.62
   6 -12  -6    2.45    0.61
   6  -8  -3    2.50    0.40
  -3 -16   6    4.01    0.49
   1 -14   4   45.93    0.96
   3 -15   0    1.74    0.80
   3 -11   3    8.21    0.65
   4 -12   1   22.71    0.78
   6 -11  -4   70.97    0.85
   6  -9  -3   69.05    0.75
  -2 -17   4    1.06    0.46
  -1 -17   3    1.43    0.47
   0 -14   5    0.44    0.60
   0 -12   6    8.48    0.71
   1 -12   5   11.29    0.69
   2 -17  -2    2.33    0.58
   3 -14   1  124.66    1.20
   4 -14  -1    0.95    0.69
   5 -11  -1  404.81    1.75
  -2 -15   6    0.52    0.54
   1 -17   0   13.91    0.64
   4 -11   1    3.19    0.62
   6 -10  -4  266.53    1.30
   6  -8  -4    8.19    0.41
  -1 -15   5   -0.30    0.58
   2 -17  -3    1.12    0.55
   2 -13   3  101.75    1.11
   3 -16  -3    0.33    0.60
   4 -15  -7    6.54    0.63
   4 -15  -4    4.29    0.63
   5 -12  -2    3.20    0.64
   5 -10  -1  181.06    1.14
   6  -9  -4   30.96    0.57
   1 -11   5   27.23    0.73
   2 -17  -5    3.73    0.54
   2 -17  -4    1.73    0.51
   2 -15   1   47.55    1.01
   3 -16  -4   -0.53    0.64
   3 -12   2   11.48    0.71
   4 -15  -6    2.98    0.59
   4 -14  -2    7.23    0.70
   4 -10   1   66.20    0.81
   5  -9  -1  408.11    1.51
   6 -10  -5   81.57    0.80
   0 -17   1  118.54    1.01
   1 -17  -1    0.38    0.61
   1 -13   4   88.16    1.12
   2 -14   2   73.51    1.03
   2  -8   4   28.09    0.52
   3 -16  -6    4.46    0.54
   3 -16  -5   16.53    0.64
   4 -12   0  322.95    1.61
   6  -9  -5  172.03    0.98
  -1 -10   7    3.03    0.49
   1 -16   1   17.07    0.69
   1 -10   5   24.39    0.72
   2 -16  -1    0.44    0.61
   3 -14   0    3.29    0.71
   3 -13   1    2.92    0.70
   5 -13  -5    8.19    0.64
  -3 -17   4    4.05    0.43
  -2 -17   3    1.74    0.53
  -1  -9   7    1.43    0.50
  -1  -8   7  326.48    1.34
   1  -8   5  259.99    1.19
   2 -12   3    0.72    0.65
   3 -11   2   18.93    0.68
   0 -16   2   10.69    0.63
   0  -9   6    4.50    0.48
   0  -8   6    3.40    0.41
   1 -17  -2   10.03    0.62
   4 -11   0    0.28    0.58
   5 -10  -2   24.18    0.62
  -1 -14   5   43.87    0.87
   2 -15   0    7.35    0.72
   3 -10   2    4.83    0.53
   4 -13  -2   14.69    0.72
   5  -9  -2  224.64    1.13
   5  -8  -2   57.77    0.62
   1 -17  -3    0.74    0.55
   1 -16   0    4.55    0.65
   1 -12   4  151.90    1.21
   2 -14   1   42.02    0.90
   2 -13   2   81.78    1.03
   3 -15  -3   -0.12    0.63
   3 -12   1  311.62    1.58
   3  -9   2    3.98    0.52
   4 -10   0   35.86    0.67
   5 -12  -5    3.10    0.57
  -1 -17   1    0.21    0.59
   0 -12   5   88.12    0.95
   1 -17  -5   19.13    0.58
   2 -16  -3    1.61    0.58
   2 -11   3    2.38    0.59
   3 -13   0   16.19    0.75
   3  -8   2    4.23    0.39
   5 -12  -6   28.47    0.66
  -3 -13   7    0.11    0.57
   0 -17  -1  122.03    1.04
   3 -15  -7    3.75    0.58
   4  -9   0   43.52    0.63
   4  -8   0  160.54    0.90
  -3 -17   3    1.50    0.47
  -2 -11   7   34.22    0.69
   1 -16  -1   21.47    0.83
   1 -15   1    7.35    0.72
   1 -13   3   -0.41    0.69
   1 -11   4    2.85    0.59
   2 -15  -1   32.23    0.83
   2 -10   3   10.05    0.55
   3 -15  -6    5.32    0.61
   3 -15  -5   42.99    0.79
   4 -11  -1   32.57    0.71
   5  -8  -3   91.75    0.73
  -4 -16   5    0.43    0.48
  -4 -15   6    2.44    0.54
  -2 -13   6   -0.39    0.60
   1 -14   2    2.12    0.71
   2 -12   2   48.24    0.84
   3 -11   1  100.63    0.96
   4 -12  -2  111.01    1.03
   5 -11  -5    3.37    0.52
  -3 -14   6   24.51    0.72
  -1 -17   0   14.48    0.60
  -1 -13   5    0.84    0.59
  -1 -11   6   97.06    0.90
   0 -17  -2   18.13    0.64
   0 -15   2    0.30    0.77
   0 -11   5   76.26    0.88
   2 -14   0   27.41    0.82
   2  -9   3   48.95    0.64
   2  -8   3  268.45    1.12
   5 -11  -7    0.70    0.49
   5 -10  -4   25.35    0.57
  -2 -16   3    1.81    0.57
  -2 -10   7    1.12    0.52
   0 -17  -3   39.36    0.76
   1 -10   4   64.85    0.78
   2 -13   1   54.57    0.91
   3 -12   0   10.81    0.67
   3 -10   1   86.15    0.83
   5  -9  -4  222.98    1.06
  -3 -15   5   41.89    0.74
  -2 -17   1   34.32    0.67
  -2 -14   5    0.02    0.56
   1 -12   3   19.65    0.76
   4  -9  -1  469.64    1.52
   5 -10  -5    5.21    0.46
   5  -8  -4   72.53    0.62
 -16  -8  10    5.90    0.50
 -14  -9   9    4.38    0.65
 -13 -10   7   18.93    0.77
 -13  -6  12    4.25    0.59
 -12 -11   1    2.83    0.54
 -12 -11   2    2.14    0.53
 -12 -11   3   62.42    0.85
 -12  -8  10   27.50    0.76
 -12  -7  11   69.48    0.91
 -11  -5  12    3.87    0.52
 -10 -11   2    1.42    0.63
  -9  -5  11   46.32    0.71
  -7  -7   8   23.20    0.64
  -7  -4  10   48.26    0.59
  -6  -9   4   33.47    0.65
  -5  -9   2  229.60    1.07
 -15  -5  13    7.26    0.61
 -14 -10   7   15.17    0.62
 -13 -11   2   17.92    0.59
 -13  -9   9   23.20    0.73
 -12 -10   7   71.23    0.92
 -11 -11   3   12.31    0.61
 -10  -6  11    5.96    0.55
  -7  -8   7   61.08    0.74
  -6 -10   0   85.09    0.80
  -6  -7   7  114.63    0.83
  -6  -6   8   95.67    0.79
 -16  -5  13    9.43    0.50
 -15 -10   7   21.88    0.63
 -14  -5  13   28.30    0.68
 -13 -11   3    6.05    0.53
 -12 -11   4    0.58    0.54
 -12  -9   9   45.09    0.84
 -12  -6  12    2.51    0.69
 -12  -4  13    5.63    0.58
 -11 -11   4   32.26    0.79
 -11 -10   7    1.17    0.75
 -10 -11   3   50.83    0.79
  -9 -11   1   34.42    0.71
  -8  -8   8   74.65    0.84
  -8  -7   9   45.36    0.71
  -6 -10   1   10.19    0.56
  -6  -8   6   51.19    0.66
  -5  -7   6   67.22    0.64
 -16  -9   9    6.99    0.53
 -13 -11   4    3.25    0.55
 -11  -8  10    2.18    0.64
 -11  -7  11    3.86    0.71
  -8 -10   5   91.33    0.99
  -8  -4  11   52.14    0.65
  -5  -6   7   98.49    0.72
  -4  -9  -1  201.28    0.90
 -14 -11   3   26.56    0.59
 -14 -11   4    7.34    0.55
 -13 -11   5   11.58    0.66
 -13  -5  13   17.09    0.64
 -11  -9   9    4.64    0.66
  -9 -11   3    0.43    0.67
  -9 -10   6    3.89    0.63
  -9  -8   9   28.11    0.71
  -8  -9   7   49.82    0.78
  -8  -6  10  177.80    1.06
  -7  -9   6  174.39    1.10
  -6 -10   2  362.06    1.46
  -5  -8   5  135.98    0.87
  -4  -9   0   43.06    0.53
 -14 -10   8    7.13    0.57
 -14  -7  12    6.40    0.66
 -13 -10   8   11.72    0.65
 -10 -10   7    8.35    0.67
 -10  -5  12    4.65    0.58
  -9  -9   8  282.84    1.45
  -8 -11   0    4.02    0.53
  -8 -11   1  235.05    1.26
  -6  -5   9  106.64    0.76
 -16  -7  12   16.21    0.53
 -15 -10   8    8.10    0.56
 -14 -11   5    1.66    0.50
 -13  -7  12  131.88    1.14
  -7  -5  10   81.07    0.72
  -6  -9   5  183.90    1.07
  -4  -9   1  470.19    1.38
 -15  -6  13   17.04    0.64
 -13  -9  10    1.47    0.61
 -12  -5  13   85.96    0.93
 -11 -10   8    3.40    0.77
 -11  -4  13   93.78    0.86
 -10  -9   9  184.35    1.32
 -10  -8  10   29.61    0.75
  -9  -6  11  109.00    0.92
  -9  -4  12    4.53    0.52
 -16  -6  13   11.87    0.49
 -14  -6  13    2.10    0.57
 -12  -9  10    1.65    0.75
 -11 -11   6   87.28    1.03
 -10  -7  11  106.33    0.99
  -8 -11   3   21.26    0.65
  -8 -10   6    7.68    0.63
  -8  -5  11    6.18    0.54
  -5 -10   0  108.94    0.82
  -4  -8   4  268.85    1.10
 -13  -6  13   28.52    0.77
 -12  -7  12   22.76    0.71
  -9 -10   7    3.40    0.64
  -7 -11   0  253.95    1.26
  -7  -8   8   13.59    0.59
  -7  -7   9   37.51    0.66
  -7  -3  11   25.03    0.51
  -6  -7   8  198.12    1.07
  -5  -9   4  242.97    1.16
  -4  -9   2   50.42    0.59
 -14 -10   9    7.31    0.60
 -13 -11   7    1.02    0.63
 -13 -10   9   29.22    0.72
 -10 -11   6   11.51    0.78
 -10 -10   8    4.58    0.66
  -8  -9   8   56.22    0.83
  -7  -9   7   20.46    0.65
  -5  -7   7  126.95    0.85
 -15 -10   9   20.25    0.58
 -14 -11   7   14.57    0.62
 -12 -10   9    8.81    0.66
 -11  -5  13   11.81    0.65
 -10  -6  12    2.34    0.54
  -9  -8  10   72.93    0.97
  -6  -9   6  252.26    1.26
  -6  -6   9    7.36    0.45
  -5  -8   6    3.02    0.44
 -14  -8  12   49.63    0.80
 -11 -12   2    1.80    0.55
 -11 -11   7    1.04    0.62
  -9  -9   9  222.78    1.34
  -9  -5  12   18.76    0.55
  -7 -11   3    7.21    0.66
  -7  -6  10   24.94    0.57
  -6  -4  10    6.36    0.38
  -5 -10   2   24.72    0.57
 -15  -9  11    0.84    0.48
 -15  -7  13    7.84    0.57
 -14  -9  11    2.14    0.58
 -13  -9  11    1.92    0.67
 -13  -8  12    7.71    0.70
 -12 -12   2   20.38    0.54
 -12 -12   3   -0.33    0.50
 -11 -12   3   16.75    0.62
 -11 -10   9   12.43    0.70
 -10 -12   1    0.99    0.55
 -10 -12   2  125.82    1.04
  -9  -7  11    1.66    0.56
  -8 -10   7   18.99    0.70
  -7  -4  11  194.80    1.02
 -14  -7  13   15.98    0.63
 -13 -12   3   50.84    0.67
 -13 -11   8    4.27    0.65
 -10 -12   3    7.05    0.61
 -10  -9  10    2.22    0.76
  -9 -11   6   39.36    0.80
  -8  -6  11    2.64    0.51
  -7 -10   6   35.04    0.74
  -6 -11   0   19.01    0.63
  -5  -9   5   20.29    0.56
  -4  -8   5   15.46    0.45
 -14 -11   8    2.70    0.53
 -14 -10  10   34.90    0.71
 -13 -12   4    5.62    0.48
 -13  -7  13    4.46    0.67
 -12 -12   5    2.13    0.59
 -12 -11   8    7.85    0.62
 -12  -9  11  131.76    1.19
 -10 -12   4   30.38    0.79
 -10 -11   7   19.47    0.72
  -9 -12   2    1.18    0.58
  -7 -11   4   14.13    0.65
  -6 -10   5   86.42    0.88
  -5 -10   3  182.82    1.07
 -15 -10  10    6.16    0.50
 -13 -12   5    2.33    0.49
 -12  -8  12  194.98    1.28
 -11 -12   5   29.47    0.68
 -10 -10   9    1.82    0.66
  -8  -4  12  745.44    1.92
  -7  -8   9   76.38    0.85
  -6 -11   2    4.98    0.53
  -6  -8   8   21.22    0.60
  -6  -5  10    1.65    0.41
 -15  -6  14    2.20    0.51
 -12 -10  10   14.46    0.68
 -11 -11   8   45.90    0.83
 -10  -7  12    1.21    0.58
 -10  -5  13   65.29    0.82
  -9  -6  12   11.77    0.56
  -8 -12   1   24.26    0.71
  -8  -9   9   56.37    0.85
  -7  -5  11    4.41    0.51
  -6  -9   7   34.84    0.69
  -4 -10   0   35.82    0.52
  -3  -9   1   24.02    0.41
 -13 -12   6    1.07    0.51
 -11  -9  11    5.62    0.67
 -10 -12   5   25.53    0.70
  -9 -11   7    0.62    0.64
  -8 -12   2   43.66    0.75
  -8 -11   6    0.32    0.62
  -7  -7  10  135.20    1.00
  -5  -8   7    7.17    0.50
  -4 -10   1   24.15    0.49
  -4  -9   4  170.57    0.95
 -14 -11   9    7.36    0.53
 -13 -11   9   -0.07    0.56
 -11 -10  10    7.51    0.67
 -11  -8  12   31.41    0.76
 -10 -11   8    1.77    0.65
  -9  -9  10   20.87    0.72
  -8 -10   8   83.56    0.97
  -5  -9   6  250.74    1.24
  -5  -7   8   73.90    0.74
 -15  -8  13   44.69    0.69
 -13  -6  14   16.23    0.67
 -12 -11   9   35.34    0.74
  -9 -12   5  164.50    1.24
  -9 -10   9  129.10    1.13
  -8  -7  11   81.22    0.87
  -8  -5  12    3.40    0.48
  -6 -10   6    4.90    0.60
  -3  -9   2   28.08    0.45
  -3  -8   4   79.71    0.63
 -14 -10  11    0.56    0.50
 -14  -8  13    8.64    0.57
 -13 -12   7   14.78    0.59
 -12 -12   7    1.99    0.59
  -7 -12   1  111.66    1.01
  -6 -11   4   72.87    0.86
  -6  -6  10   58.23    0.69
  -5 -11   0  384.08    1.42
  -5 -11   1  419.00    1.54
  -4  -8   6   44.72    0.60
 -13 -10  11  101.15    0.98
 -11 -12   7   15.55    0.74
 -11 -11   9   44.51    0.82
 -11  -7  13   39.03    0.75
 -10 -10  10   21.20    0.83
 -10  -6  13   90.74    0.90
  -8 -11   7   13.98    0.71
  -7 -12   2   38.85    0.77
  -7  -6  11   16.66    0.57
  -5  -6   9  111.78    0.84
 -12 -10  11   -0.56    0.59
 -12  -6  14    2.27    0.61
 -10  -8  12    1.28    0.60
  -9  -7  12    2.76    0.58
  -7 -12   3    0.92    0.66
  -7 -11   6   13.54    0.69
  -7  -9   9   24.73    0.81
  -5 -11   2  388.28    1.51
  -5 -10   5    5.94    0.57
  -4 -10   3  245.31    1.15
 -14 -11  10   17.36    0.57
 -14  -7  14    0.95    0.51
 -13 -12   8   -0.10    0.56
 -12  -8  13    3.23    0.70
 -10 -12   7    4.28    0.74
  -8  -9  10    9.48    0.77
  -8  -6  12    6.29    0.62
  -6  -8   9   19.01    0.64
  -5  -4  10    2.72    0.40
 -13  -7  14    1.77    0.63
 -12 -12   8    1.02    0.59
 -11 -13   3    0.14    0.50
 -10 -11   9   94.83    1.03
  -8 -10   9   55.06    0.89
  -7 -10   8   13.98    0.70
  -6 -11   5   14.66    0.68
  -6 -10   7   49.46    0.90
  -5 -11   3  142.38    1.03
  -5  -9   7   14.04    0.60
  -5  -8   8   12.09    0.57
  -3  -7   6  136.06    0.78
 -12 -13   3   41.54    0.59
 -12 -13   4    3.34    0.46
 -11 -13   4   62.13    0.76
 -11 -12   8   37.14    0.84
 -11 -10  11   15.67    0.70
 -11  -9  12   65.72    0.90
 -10 -13   2    1.05    0.56
 -10 -13   3   26.18    0.72
  -8  -8  11   12.48    0.65
  -7 -12   4   86.57    0.94
  -7  -4  12   85.86    0.81
  -6  -7  10    1.46    0.63
  -3  -8   5  345.97    1.21
 -12 -13   5   18.91    0.59
 -11 -11  10   38.64    0.85
 -11  -6  14   42.51    0.79
 -10 -13   4    1.13    0.55
 -10  -7  13    2.20    0.57
  -9 -13   2   74.16    0.88
  -9 -10  10   -0.02    0.66
  -8 -11   8   12.42    0.83
  -7  -7  11   22.52    0.65
  -6 -12   1    7.89    0.60
  -6 -12   2    3.02    0.64
  -3 -10   0    1.50    0.36
 -14  -9  13    3.49    0.51
 -11  -8  13   14.05    0.66
  -9 -13   3    8.53    0.62
  -9 -11   9    3.52    0.79
  -9  -8  12   65.10    0.94
  -9  -6  13    3.21    0.55
  -7 -11   7   16.16    0.72
  -6  -5  11  181.12    1.04
  -5 -11   4  412.07    1.64
  -5 -10   6  186.88    1.18
  -5  -5  10  196.40    1.04
  -4  -9   6  145.73    0.98
  -4  -8   7    5.63    0.48
  -3  -9   4    2.96    0.39
 -13 -12   9   20.55    0.61
 -13  -9  13    3.76    0.58
 -12 -12   9    3.97    0.62
 -10 -13   5    8.44    0.62
 -10 -12   8   20.90    0.71
 -10 -10  11    5.70    0.67
  -9 -13   4   16.26    0.71
  -8  -7  12    0.57    0.66
  -7  -5  12  477.47    1.65
  -6 -11   6   35.54    0.77
  -4 -11   0    0.74    0.42
  -4 -11   1   33.13    0.61
  -4  -7   8   43.79    0.62
 -14  -8  14    8.13    0.52
 -13 -11  11    1.30    0.53
 -11 -13   6   44.28    0.73
 -10  -9  12   98.13    1.01
  -8 -13   2    0.68    0.62
  -3 -10   2  209.83    1.00
 -13  -8  14   -0.32    0.57
 -12  -9  13   39.69    0.79
 -11 -12   9    8.58    0.61
 -10 -13   6    1.30    0.65
 -10 -11  10    6.06    0.66
  -8 -13   3   31.47    0.73
  -7 -10   9   10.50    0.70
  -7  -9  10  156.25    1.17
  -6 -12   4    4.73    0.72
  -6 -10   8  152.15    1.16
  -6  -9   9   31.06    0.74
  -6  -6  11   38.45    0.74
  -4 -11   2   57.98    0.70
  -4 -10   5   -0.12    0.51
 -12 -11  11    1.78    0.59
 -11  -7  14   85.62    0.95
 -10  -8  13    1.15    0.70
  -9 -12   8    1.01    0.65
  -8 -13   4   23.19    0.78
  -8 -12   7   17.57    0.73
  -8 -10  10   70.28    0.95
  -7 -12   6   54.19    0.97
  -5 -11   5    3.43    0.62
  -5  -9   8   48.37    0.78
  -3  -8   6  108.30    0.77
  -2  -8   4    3.61    0.33
 -10  -6  14   31.23    0.72
  -8 -11   9   15.49    0.74
  -7 -11   8   35.26    0.82
  -7  -8  11   48.62    0.81
  -7  -6  12   36.77    0.68
  -5 -12   1   14.35    0.61
  -5 -10   7   21.35    0.70
  -5  -8   9   84.58    0.88
  -4 -11   3   23.06    0.60
  -3 -10   3  505.40    1.54
  -3  -9   5  126.23    0.85
  -3  -7   7   40.80    0.54
 -13 -12  10    5.20    0.51
 -11  -9  13   29.76    0.81
 -10 -12   9   16.48    0.69
  -9 -11  10   53.43    0.98
  -9 -10  11   67.77    0.93
  -7 -13   2  111.11    1.04
  -6 -11   7   18.47    0.73
  -5 -12   2    3.02    0.54
  -4  -9   7   43.86    0.79
 -12 -13   8    3.90    0.55
 -12 -12  10   15.27    0.59
  -9  -9  12    9.45    0.66
  -8 -13   5   16.45    0.67
  -8  -8  12   23.77    0.70
  -8  -6  13   29.56    0.74
  -5 -12   3   60.91    0.91
  -4  -8   8  194.18    1.12
 -13 -10  13   90.20    0.89
 -11 -13   8   44.30    0.77
 -11 -12  10    4.33    0.66
  -8 -12   8  106.26    1.07
  -6  -7  11   13.77    0.61
  -5 -11   6   11.01    0.67
 -13 -11  12    4.83    0.51
 -10 -11  11  105.85    1.04
 -10  -7  14   54.95    0.85
  -9 -12   9   20.06    0.73
  -7 -12   7   10.44    0.71
  -7  -7  12    2.92    0.58
 -13  -9  14    3.39    0.50
 -12 -11  12    0.64    0.55
 -12 -10  13    0.70    0.55
 -11  -8  14   22.91    0.70
 -10 -13   8   10.32    0.69
 -10  -9  13   20.32    0.79
  -9  -8  13    7.87    0.62
  -7 -10  10  184.00    1.29
  -6 -10   9   69.72    0.94
  -6  -9  10  235.62    1.37
  -5 -12   4   35.61    0.77
  -3 -11   0  132.53    0.84
  -3 -11   1    8.76    0.43
  -2 -10   0  318.93    1.11
  -2  -8   5  112.14    0.73
  -2  -7   6   12.01    0.39
 -12 -13   9    1.10    0.54
 -11 -14   5    6.50    0.49
 -10 -14   3   16.44    0.53
 -10 -14   4   36.55    0.68
 -10 -12  10   10.42    0.64
  -9  -6  14    0.95    0.60
  -8 -10  11   17.67    0.74
  -8  -7  13   52.80    0.83
  -7 -13   5   40.73    0.79
  -6 -13   2    5.64    0.63
  -6 -11   8    0.98    0.67
  -6  -5  12    0.03    0.57
  -5 -10   8    2.82    0.65
  -5  -9   9    1.64    0.61
  -3 -11   2  519.11    1.63
  -3  -9   6    3.88    0.48
  -3  -8   7  102.16    0.80
  -2 -10   1    1.01    0.33
  -2  -9   4   36.51    0.56
 -12 -12  11   30.98    0.66
 -12  -9  14    0.28    0.55
 -10 -14   5    4.60    0.55
  -9 -14   3   34.77    0.67
  -8  -9  12    7.90    0.76
  -6 -13   3   12.98    0.64
  -4 -12   1  225.00    1.20
  -4 -11   5   77.10    0.89
  -4  -5  10    8.24    0.47
 -13  -8  15   46.36    0.71
 -11 -14   6   10.43    0.54
 -11 -13   9   16.52    0.61
 -11 -11  12   14.36    0.68
 -11 -10  13   75.31    0.92
  -9 -14   4    0.65    0.55
  -9 -13   8   10.58    0.75
  -8 -13   7    6.67    0.65
  -8 -12   9   94.00    1.12
  -7  -5  13    6.68    0.62
  -5 -11   7    1.51    0.66
  -4 -12   2  115.44    0.93
  -4  -9   8    5.07    0.60
  -3 -10   5   56.08    0.72
  -3  -7   8  567.75    1.63
 -11 -12  11   10.16    0.62
 -10 -14   6    0.53    0.55
 -10  -8  14   11.17    0.69
  -9 -14   5   30.87    0.72
  -7  -8  12   34.81    0.75
  -6 -13   4    7.93    0.66
  -6 -12   7    3.49    0.69
  -6  -6  12   45.77    0.78
  -5  -6  11   38.67    0.70
  -3 -11   3    0.98    0.47
 -11  -9  14    3.01    0.63
 -10 -13   9   20.91    0.69
  -9 -12  10    2.28    0.63
  -9  -9  13   59.70    0.95
  -9  -7  14   62.00    0.88
  -8 -14   3    0.91    0.55
  -4 -12   3    2.53    0.57
  -4  -8   9   19.99    0.64
  -4  -6  10  152.37    0.97
  -3  -5   9  211.25    0.96
 -12  -8  15    0.41    0.52
 -11 -14   7   81.99    0.79
 -10 -11  12    8.28    0.62
  -8  -8  13    7.32    0.71
  -7  -6  13  215.25    1.24
  -6 -13   5    1.37    0.63
  -5 -13   1   26.61    0.72
  -4 -11   6  153.96    1.16
 -10 -14   7    1.29    0.57
 -10 -10  13   16.06    0.68
  -9 -14   6   14.60    0.65
  -7 -11  10    1.95    0.70
  -7 -10  11   26.58    0.79
  -6 -11   9    9.35    0.73
  -6 -10  10   11.06    0.72
  -5 -12   6   35.88    0.83
  -5 -10   9   34.71    0.82
  -5  -7  11   96.78    1.01
  -4 -12   4  457.21    1.77
  -3 -10   6   15.35    0.67
  -3  -9   7    0.74    0.51
  -1  -9   2  209.31    0.90
 -11 -13  10   68.12    0.80
  -9 -13   9   11.45    0.64
  -8 -11  11    1.91    0.66
  -7 -14   3    4.00    0.67
  -7 -13   7   17.89    0.74
  -6  -7  12  129.88    1.06
  -5 -13   3   10.32    0.65
  -5  -9  10  227.41    1.43
  -3  -8   8    6.32    0.51
  -3  -6   9  233.57    1.06
  -2  -7   7   48.49    0.57
  -1  -8   4  208.45    0.90
 -12 -12  12    0.82    0.48
 -12 -10  14   16.13    0.59
  -8  -6  14   55.53    0.83
  -7 -12   9   90.00    1.04
  -7  -9  12    8.19    0.67
  -7  -7  13    8.21    0.70
  -6 -12   8    4.77    0.72
  -4 -10   8   13.47    0.71
  -2 -10   4  253.58    1.16
 -11  -8  15   20.37    0.67
 -10 -13  10   16.76    0.66
 -10  -9  14    5.08    0.61
  -9 -11  12   41.97    0.81
  -9  -8  14    0.57    0.59
  -8 -14   6  169.97    1.17
  -7 -14   4    1.91    0.61
  -5 -13   4   70.38    0.92
  -4  -9   9    2.89    0.64
  -3 -12   1   15.09    0.59
  -3 -11   5   64.90    0.82
  -2 -11   0    2.53    0.44
  -2 -11   1   50.37    0.63
 -11 -12  12   33.71    0.70
  -9 -12  11    3.83    0.62
  -8  -9  13   11.38    0.77
  -5 -12   7   25.50    0.80
  -4 -11   7   21.64    0.77
  -2 -11   2    3.56    0.52
  -2  -9   6   55.36    0.67
 -11 -10  14    3.89    0.58
  -8 -13   9    1.77    0.62
  -8  -7  14   31.92    0.76
  -7 -13   8   14.71    0.72
  -6  -8  12   47.47    0.82
  -5 -13   5    8.89    0.68
  -5  -8  11   36.40    0.79
  -2  -8   7   36.93    0.58
  -1 -10   0  299.61    1.07
 -11 -13  11    0.85    0.49
  -9 -14   8    1.46    0.62
  -7  -8  13   42.47    0.88
  -6 -14   2   46.16    0.76
  -6 -14   3   38.40    0.78
  -6 -13   7   30.89    0.81
  -6 -11  10    7.43    0.73
  -4 -13   1   30.20    0.70
  -4  -4  11    7.77    0.41
  -3 -12   3   24.00    0.64
  -3 -10   7  211.41    1.25
  -2 -11   3    6.20    0.56
  -1  -8   5   75.28    0.63
 -10 -12  12    7.68    0.63
 -10 -11  13  148.80    1.13
  -7 -14   6   55.54    0.83
  -7 -12  10  104.59    1.16
  -6 -14   4    3.61    0.70
  -6 -12   9    0.13    0.82
  -6 -10  11  183.22    1.32
  -6  -5  13    5.60    0.60
  -5 -10  10   10.44    0.73
  -4 -13   3  112.74    1.08
  -4 -12   6  150.95    1.21
  -1 -10   2   85.19    0.68
  -1  -9   4   14.74    0.39
  -1  -7   6  362.70    1.19
 -11  -9  15    8.18    0.59
 -10 -14   9    3.85    0.52
  -9  -9  14   51.43    0.83
  -8 -12  11   76.73    1.03
  -8 -11  12   25.80    0.76
  -6  -6  13  104.12    1.03
  -5  -6  12    4.07    0.57
  -3 -12   4    1.25    0.59
  -3 -11   6  288.21    1.46
  -3  -8   9  172.50    1.10
 -10 -13  11    1.39    0.55
 -10 -10  14    1.92    0.60
  -9 -15   5    0.46    0.50
  -8  -8  14   90.10    1.00
  -6 -14   5   -0.30    0.72
  -6  -9  12   32.15    0.87
  -5 -12   8   18.91    0.80
  -4 -13   4   25.75    0.84
  -4 -11   8   47.22    0.90
  -4 -10   9  120.61    1.14
  -3  -5  10   80.65    0.67
  -8 -14   8   24.80    0.71
  -8 -13  10    0.85    0.71
  -8 -10  13   59.66    0.87
  -7 -13   9   22.63    0.76
  -6 -13   8    1.01    0.80
  -5  -7  12   60.98    0.86
  -4  -9  10  189.06    1.31
  -3  -6  10   14.96    0.50
  -1 -10   3   20.29    0.49
  -9 -15   6    2.57    0.51
  -9 -14   9   20.71    0.64
  -9 -12  12   15.77    0.66
  -9 -11  13    6.05    0.65
  -8 -15   4    0.64    0.49
  -7  -9  13   73.94    0.94
  -5 -14   3    2.75    0.70
  -4 -12   7    0.43    0.70
  -4  -7  11   14.70    0.65
  -1  -8   6  180.52    0.94
 -11 -11  14   48.28    0.71
  -9 -13  11   54.34    0.82
  -8 -15   5    3.94    0.52
  -6 -14   6    9.57    0.67
  -4 -13   5  347.38    1.67
  -2  -8   8  317.04    1.33
 -10 -14  10    1.24    0.48
  -9 -10  14   11.33    0.70
  -9  -8  15    9.07    0.65
  -7  -7  14  120.49    1.07
  -6 -12  10    2.88    0.81
  -5 -14   4    0.39    0.61
  -5 -11  10   29.76    0.96
  -3  -9   9    1.03    0.61
  -3  -7  10    3.79    0.51
  -2 -12   1   56.80    0.69
  -2 -12   2  250.64    1.25
  -2 -11   5   42.55    0.73
  -2  -5   9  124.60    0.75
  -1 -10   4   86.08    0.76
   0  -9   2    4.77    0.33
  -9 -15   7    0.41    0.48
  -8 -14   9    4.56    0.61
  -8  -9  14    1.36    0.63
  -7 -15   3    1.98    0.53
  -7 -15   4    2.59    0.59
  -7 -14   8    5.31    0.62
  -7 -12  11   59.32    0.91
  -6  -8  13   14.57    0.80
  -5 -12   9   16.48    0.80
  -5  -8  12   34.35    0.80
  -3 -13   1  209.07    1.19
  -3 -13   2    2.84    0.53
  -2  -6   9   36.05    0.52
  -1 -11   0  141.68    0.86
  -1 -11   1   27.73    0.51
  -1  -7   7   25.54    0.49
   0  -8   4   36.65    0.48
 -10 -13  12    2.57    0.51
 -10 -11  14    0.84    0.59
  -9 -14  10    4.72    0.61
  -8 -12  12  140.38    1.18
  -7 -15   5   19.78    0.70
  -7 -13  10    2.19    0.64
  -6 -13   9    2.65    0.80
  -5 -14   5   33.75    0.79
  -5 -10  11   29.68    0.85
  -4 -11   9    4.10    0.74
  -3 -13   3    6.56    0.60
  -3 -12   6    4.29    0.68
  -2 -12   3  135.14    1.00
  -1 -11   2   62.76    0.68
  -8 -11  13   16.97    0.68
  -7 -10  13   36.45    0.88
  -4 -12   8  136.68    1.23
  -4 -10  10    2.38    0.72
  -2 -10   7   -0.36    0.58
  -2  -9   8   11.94    0.60
  -5 -13   8   13.24    0.76
  -4 -14   2    7.82    0.66
  -3 -13   4   16.33    0.67
  -1  -8   7  260.95    1.16
 -10 -10  15   16.91    0.64
  -6 -15   3   36.01    0.70
  -6 -15   4    1.04    0.66
  -6  -9  13   14.53    0.80
  -5  -9  12   20.20    0.76
  -4 -14   3    8.86    0.66
  -3 -11   8  131.89    1.18
  -3 -10   9    5.72    0.71
   0 -10   0   14.88    0.38
   0 -10   1   11.46    0.39
  -9 -13  12  102.52    0.93
  -8 -14  10   18.01    0.70
  -8 -10  14   39.56    0.79
  -7 -14   9   38.12    0.76
  -6 -14   8    4.00    0.64
  -4 -14   4   75.45    0.94
  -4 -13   7  269.52    1.55
  -3 -13   5    4.79    0.78
  -3 -12   7   29.89    0.84
  -3  -5  11  124.46    0.87
  -2  -8   9    2.96    0.54
   0 -10   2  174.66    0.90
  -9 -11  14    8.70    0.62
  -8  -8  15    2.91    0.61
  -7 -15   7    8.04    0.64
  -6 -12  11   35.79    0.83
  -5 -11  11   -0.50    0.70
  -5  -7  13   67.53    0.97
  -3  -9  10    5.93    0.69
  -3  -6  11  162.23    1.02
  -3  -4  11  157.00    0.88
  -7 -13  11   -0.29    0.69
  -7 -12  12    2.45    0.62
  -7  -9  14    7.11    0.67
  -4 -14   5   -0.85    0.63
  -4 -12   9    4.16    0.88
  -2 -11   7   34.39    0.79
  -2 -10   8  266.81    1.42
  -1 -10   6   30.34    0.66
  -1  -9   7    1.07    0.50
  -1  -7   8   41.39    0.59
   0  -7   6  129.72    0.77
  -6 -15   6   16.48    0.67
  -6  -7  14   77.60    0.98
  -5 -10  12   65.41    1.06
  -2 -13   1    9.75    0.60
  -2 -13   2   59.13    0.83
  -9 -10  15   28.36    0.71
  -8 -13  12    4.25    0.60
  -5 -15   4   24.07    0.78
  -2 -13   3   32.91    0.79
  -2  -9   9   57.49    0.83
  -2  -6  10   95.22    0.78
  -2  -5  10   17.94    0.44
  -1 -12   0   29.18    0.60
  -1 -12   2   10.04    0.53
  -1 -11   5   34.30    0.70
   0  -9   5   11.22    0.48
  -8 -15   9   20.38    0.57
  -8  -9  15   13.04    0.69
  -7 -14  10   24.14    0.72
  -6 -14   9    0.90    0.61
  -4 -14   6   94.74    1.05
  -4 -13   8   17.57    0.82
  -3 -12   8    4.01    0.76
  -3 -10  10    1.81    0.85
  -3  -8  11   11.66    0.78
  -2 -12   6  191.02    1.28
  -2  -7  10   20.65    0.66
  -1  -8   8   80.08    0.79
   0 -10   4   14.64    0.51
  -8 -14  11   14.50    0.61
  -8 -11  14   28.52    0.73
  -6 -15   7    5.76    0.63
  -6  -8  14   91.52    1.01
  -5 -14   8   21.07    0.75
  -3 -14   3   71.24    0.88
   0 -11   1  179.45    0.98
   1  -8   3   37.10    0.47
  -9 -12  14   -0.66    0.54
  -5 -12  11  198.69    1.44
  -3 -14   4   68.66    0.91
  -3 -13   7    1.07    0.85
  -1 -12   4   51.48    0.78
  -1 -10   7    2.85    0.59
   0 -11   2   11.75    0.49
   0  -6   7    1.58    0.34
  -6 -13  11   67.71    0.91
  -6 -12  12   91.54    1.01
  -5 -15   6   65.35    0.93
  -5 -13  10   69.41    0.97
  -5  -9  13    1.42    0.67
  -4 -14   7   18.63    0.88
  -4 -12  10   48.27    0.94
  -4  -9  12   57.18    0.94
  -2 -11   8   80.01    1.00
  -2 -10   9   30.10    0.80
  -1 -11   6   99.62    0.97
  -1  -9   8  122.50    0.99
  -1  -6   9   42.02    0.61
  -1  -5   9  249.41    1.03
   0  -7   7 1065.85    2.12
   1  -9   2    5.90    0.35
  -7 -15   9   -0.35    0.51
  -7 -13  12   32.58    0.75
  -7  -8  15   15.51    0.64
  -6 -11  13    2.60    0.75
  -6  -9  14   34.17    0.87
  -4 -15   3    6.35    0.71
  -4 -13   9  183.70    1.43
  -4 -11  11   99.37    1.13
  -3 -14   5  177.28    1.27
  -3  -9  11   84.28    1.04
  -2 -13   5   50.85    0.86
  -2 -12   7   17.75    0.77
   0 -10   5   64.22    0.75
   0  -9   6    4.10    0.49
   1  -8   4    1.12    0.34
  -9 -11  15    8.48    0.52
  -8 -10  15    4.56    0.58
  -7 -14  11  138.56    1.09
  -6 -14  10   64.19    0.87
  -4 -15   4    4.29    0.69
  -3 -12   9   40.69    0.94
  -6 -16   4   11.74    0.59
  -5 -15   7   20.44    0.77
  -5 -14   9   10.32    0.68
  -4  -6  13   86.12    0.97
  -3 -11  10  642.01    2.33
  -3  -6  12   -0.41    0.62
   0  -8   7   67.04    0.72
   1  -7   5   81.84    0.63
  -8 -12  14   15.68    0.64
  -7 -11  14    3.75    0.64
  -7  -9  15   17.26    0.71
  -6 -16   5    7.78    0.56
  -5 -10  13    4.70    0.67
  -5  -7  14   13.65    0.78
  -4 -15   5  118.47    1.09
  -4 -14   8   27.64    0.90
  -4 -10  12   17.18    0.79
  -3 -13   8  127.56    1.22
  -3  -7  12  113.52    1.08
  -2 -13   6   -1.10    0.68
  -1 -13   1    0.72    0.56
  -1 -13   2  156.80    1.10
  -1 -11   7  181.35    1.24
  -1 -10   8   34.83    0.78
  -1  -8   9  239.50    1.26
   1 -10   0  294.16    1.07
  -2 -14   2    2.31    0.59
  -2 -14   3   85.64    0.98
  -2  -6  11    0.83    0.56
   0 -10   6  200.21    1.17
   1 -10   2    5.00    0.39
   1  -9   4  116.89    0.80
   1  -8   5  229.54    1.03
  -7 -15  10   15.39    0.58
  -6 -16   6   15.69    0.59
  -5 -13  11   11.24    0.69
  -5 -12  12   -0.44    0.73
  -5  -8  14   34.11    0.90
  -4 -15   6    3.06    0.71
  -4  -8  13   45.04    0.87
  -2  -7  11   31.50    0.69
  -2  -5  11   85.75    0.73
  -1 -12   6    8.25    0.68
   0 -11   5   69.32    0.84
   0  -9   7    4.36    0.55
  -9 -10  16    0.51    0.48
  -8 -11  15   35.62    0.70
  -6 -13  12    0.29    0.63
  -4 -13  10   19.05    0.78
  -4 -12  11   16.85    0.78
  -3 -14   7   19.00    0.90
  -2 -13   7   19.35    0.92
  -2 -10  10  426.02    1.87
   0 -12   0   51.19    0.65
   0 -12   3   11.18    0.58
   0  -7   8    1.12    0.44
  -7 -13  13   -1.57    0.58
  -7 -10  15   70.00    0.88
  -6 -14  11   10.47    0.64
  -5 -16   4   45.71    0.74
  -5 -14  10   17.10    0.68
  -4  -9  13  100.99    1.17
  -3 -15   3    0.14    0.61
  -3 -12  10    4.34    0.78
  -2  -8  11    3.47    0.64
   1  -9   5    2.70    0.46
   1  -7   6   14.98    0.44
  -7 -14  12   49.79    0.74
  -6 -16   7    1.08    0.48
  -6  -8  15   17.20    0.68
  -5 -16   5   63.24    0.79
  -5 -11  13    1.29    0.64
  -5  -9  14   35.33    0.87
  -4 -14   9   79.26    0.99
  -3 -15   4   11.91    0.70
  -3 -13   9   21.85    0.84
  -1  -6  10   95.71    0.80
   0 -12   4   35.61    0.73
   0  -8   8    6.16    0.54
   1 -10   4   62.13    0.71
  -7 -12  14   15.37    0.63
  -6 -11  14   58.02    0.90
  -3 -15   5   50.99    0.94
  -1 -12   7   35.47    0.85
  -1 -10   9   56.02    0.91
  -1  -7  10   15.95    0.60
  -1  -5  10  123.14    0.80
   0 -11   6    4.58    0.63
   0 -10   7   21.73    0.70
   1 -11   0  138.62    0.87
   1 -11   1   15.61    0.48
   1 -11   2  237.90    1.15
   1  -8   6    1.99    0.44
  -6 -15  10    4.16    0.56
  -6  -9  15   18.31    0.74
  -5 -16   6    6.80    0.56
  -5 -15   9    1.14    0.58
  -3 -14   8    9.37    0.85
  -2 -12   9    1.30    0.77
  -2 -11  10   11.78    0.95
  -2  -9  11  211.76    1.40
  -1  -8  10  509.34    1.83
   0  -9   8   86.69    0.91
  -4 -10  13    8.76    0.74
  -3 -10  12   12.41    0.92
  -2 -13   8   41.69    0.93
  -1 -13   6   26.05    0.80
  -1  -4  10    1.07    0.38
   0 -12   5   84.05    0.95
   1 -11   3    6.66    0.53
   1 -10   5   22.73    0.62
   2  -9   1   70.17    0.61
   2  -8   3  258.19    1.02
  -8 -10  16   59.47    0.73
  -7 -11  15   -0.64    0.56
  -5 -16   7    0.47    0.57
  -5 -13  12   20.40    0.73
  -5 -10  14  120.57    1.12
  -4 -16   4   11.98    0.62
  -4 -15   8    0.69    0.66
  -4 -13  11  118.88    1.12
  -1 -14   2   30.15    0.78
  -1 -14   3   54.21    0.89
   1  -9   6   22.99    0.61
   2  -9   2  356.11    1.20
  -6 -14  12   22.29    0.68
  -5 -14  11    1.90    0.60
  -4 -16   5    0.19    0.60
  -4 -12  12    4.67    0.69
  -4  -7  14    0.73    0.77
  -3 -13  10    5.43    0.86
  -1 -14   1    1.34    0.56
  -1 -12   8    1.22    0.73
   0 -13   1   59.34    0.77
   0 -13   2    8.27    0.57
   0 -13   3   90.98    1.00
   0 -11   7   37.55    0.82
   0  -7   9    3.35    0.51
   0  -6   9   45.05    0.60
   1  -7   7   27.43    0.54
  -6 -10  15    0.40    0.63
  -2 -15   2   46.77    0.82
  -2 -15   3    4.46    0.63
  -2 -14   7    0.08    0.70
  -2  -6  12    7.59    0.65
  -1 -14   4    5.46    0.65
  -1 -11   9   13.71    0.79
   0 -12   6    9.18    0.70
   0 -10   8   64.56    0.91
   0  -5   9  263.70    1.07
   1  -8   7  332.15    1.36
   2  -8   4   25.72    0.49
  -6 -12  14   21.28    0.67
  -5 -15  10    1.95    0.55
  -4 -16   6   24.03    0.70
  -4 -11  13    1.26    0.78
  -4  -8  14    1.86    0.71
  -3 -14   9  155.66    1.24
  -1 -13   7   45.98    0.91
   0 -13   4   -0.20    0.61
   1 -12   1   48.01    0.71
   1 -12   2   45.00    0.77
   1 -10   6   35.15    0.73
   2 -10   1   16.57    0.49
  -5 -16   8   43.97    0.70
  -5 -11  14  105.15    1.07
  -5  -8  15   18.11    0.78
  -4 -15   9   63.65    0.87
  -2 -15   5   53.11    0.95
  -2 -13   9  100.79    1.16
  -2 -12  10  394.53    1.92
  -2  -5  12    1.37    0.48
  -1 -14   5   49.45    0.86
  -1 -10  10   38.52    0.88
   1 -12   0   29.61    0.63
   1 -12   3   21.37    0.72
   1 -11   5   24.96    0.69
   1  -9   7  196.13    1.17
   2 -10   0  325.12    1.16
   2 -10   2   25.70    0.51
   2  -9   4   16.99    0.51
   2  -7   5   58.17    0.60
  -4  -9  14    2.46    0.70
  -3  -9  13   24.19    0.84
  -2 -11  11   13.44    0.84
  -1  -7  11  181.42    1.17
  -1  -6  11   24.62    0.60
   0  -9   9    3.90    0.65
   2  -8   5   49.29    0.62
  -7 -10  16   -0.22    0.51
  -3 -16   4   -0.02    0.62
  -3 -15   8   67.68    0.97
  -2 -14   8  109.48    1.14
  -2  -9  12    1.37    0.71
  -1 -12   9   62.13    1.10
  -1  -8  11  651.79    2.13
  -1  -5  11   12.04    0.52
   0 -12   7   23.18    0.80
   0 -11   8    3.49    0.71
   2 -10  -1    1.44    0.37
  -6 -11  15   16.32    0.63
  -5 -14  12    0.01    0.53
  -5  -9  15   29.06    0.76
  -4 -14  11    4.60    0.63
  -4 -13  12    9.18    0.68
  -3 -16   5   18.94    0.70
  -3 -13  11   -0.28    0.78
  -2 -15   6    1.92    0.66
   1 -11   6   97.94    1.00
   1  -6   8  164.62    0.93
  -4 -10  14  182.13    1.34
  -3 -10  13    4.54    0.73
  -1 -11  10  198.25    1.43
   0 -13   6    5.02    0.71
   0 -10   9   10.43    0.74
   2 -11   1  214.39    1.10
   2 -10   4   49.03    0.70
   2  -9   5  178.79    1.05
  -4 -15  10    1.72    0.63
  -3 -12  12    1.77    0.69
  -2 -13  10   -0.22    0.72
  -2 -10  12   62.71    1.03
  -1 -15   3    2.56    0.70
   0 -14   1    0.35    0.61
   0 -14   2   10.45    0.64
   0 -14   3   20.69    0.69
   0  -8  10    9.46    0.77
   0  -7  10    6.88    0.56
   0  -6  10  162.21    1.00
   1 -12   5   10.98    0.69
   1  -5   8  389.00    1.26
   2 -11   0    2.00    0.45
   2 -11   2   10.95    0.52
   2  -7   6   77.49    0.70
   2  -6   6    8.18    0.39
  -5 -12  14    5.70    0.60
  -5 -10  15   15.01    0.73
  -2 -12  11    1.42    0.75
  -1 -15   2    1.40    0.57
  -1 -15   4   87.01    1.02
  -1 -14   7   66.02    0.98
  -1  -4  11   20.42    0.47
   0 -14   4   21.26    0.73
   1 -13   2    5.81    0.64
   2 -11   3    2.07    0.53
   2  -8   6   97.76    0.83
  -3 -15   9    7.40    0.67
   0 -12   8   36.36    0.89
   1 -13   1   23.93    0.66
   1 -13   3   -0.54    0.59
   1 -11   7   30.77    0.81
   2 -10   5    3.57    0.57
  -4 -11  14   21.44    0.78
  -3 -16   7   53.43    0.81
  -3 -11  13    9.92    0.71
  -3  -7  14   15.24    0.79
  -2  -7  13   50.79    0.95
  -1 -15   5    0.21    0.65
  -1 -13   9    1.01    0.75
  -1 -12  10    6.21    0.79
   0 -14   5    0.01    0.64
   0 -13   7   67.56    0.99
   1 -12   6   36.70    0.83
   2 -11  -1   51.34    0.60
   2  -9   6  141.39    1.02
  -6 -10  16   13.73    0.59
  -3  -8  14   92.43    1.10
  -2 -16   4   53.40    0.82
   3  -9   1    4.10    0.35
   3  -8   3  233.04    1.02
  -5 -11  15    5.79    0.64
  -4 -14  12    2.31    0.55
  -3 -14  11   60.06    0.88
  -3 -13  12   16.22    0.78
  -2 -16   5   41.96    0.78
  -2 -15   8    1.03    0.66
  -2  -9  13  145.27    1.38
  -1 -15   6    1.16    0.74
  -1 -14   8   20.44    0.80
  -1 -11  11   13.83    0.83
  -1  -8  12   40.31    0.95
  -1  -7  12  289.21    1.47
  -1  -6  12  243.71    1.32
   0 -10  10   53.89    0.95
   0  -4  10   38.35    0.56
   1  -7   9   36.52    0.68
   1  -6   9    5.66    0.51
   2 -12   1    0.39    0.54
   2 -12   2   48.87    0.74
   2 -10   6  163.80    1.15
   2  -7   7  315.39    1.30
   3  -9   0  119.60    0.70
  -4 -15  11    6.60    0.55
   2 -12   0   36.96    0.68
   2 -12   3    1.01    0.57
   2  -8   7   51.73    0.76
   2  -6   7    8.81    0.45
   3  -9   3    0.58    0.42
   3  -8   4  341.50    1.28
   3  -7   4    3.70    0.39
  -3 -15  10   48.14    0.80
  -3 -12  13    4.10    0.74
  -2 -16   6   73.96    0.91
  -2 -14  10    2.68    0.64
  -1  -9  12  465.79    1.98
   0 -13   8   10.95    0.78
   0 -12   9    6.06    0.78
   1 -12   7    6.79    0.74
   1 -11   8   51.34    0.93
   1  -9   9   72.94    0.95
   1  -5   9   29.03    0.55
   2  -9   7    3.92    0.61
   3 -10   2    5.42    0.45
  -4 -12  14   11.43    0.64
  -3 -10  14    3.70    0.71
  -2 -10  13   23.98    0.85
  -1  -5  12  149.50    1.00
   0 -15   3  145.84    1.18
   0 -11  10    1.52    0.75
   0  -7  11  434.06    1.70
   2  -5   7   27.48    0.47
   3 -10   0    1.00    0.35
   3  -9   4    2.98    0.49
  -4 -10  15  100.65    1.03
  -2 -15   9   35.13    0.80
  -1 -14   9   67.41    1.07
  -1 -13  10   25.89    0.85
  -1 -10  12    2.72    0.75
   0 -15   2   -0.25    0.56
   0 -15   4    4.89    0.72
   0 -14   7   17.40    0.77
   0  -9  11   65.33    1.06
   0  -6  11  140.10    1.00
   1 -14   1   53.33    0.82
   1 -14   2    2.69    0.62
   1 -14   3    9.99    0.65
   1 -10   9   16.29    0.78
   2 -11   6    9.11    0.70
   2 -10   7   11.00    0.70
   3  -8   5   46.66    0.66
   3  -7   5    6.45    0.43
  -2 -16   7   18.41    0.67
  -1 -16   3   17.41    0.70
  -1 -12  11   12.21    0.82
   1 -14   4   47.65    0.84
   2 -12   5   47.13    0.86
   3 -10  -1   67.76    0.63
   3 -10   4   12.83    0.59
   3  -6   5  451.53    1.36
  -3 -11  14  114.33    1.11
  -2 -11  13   18.08    0.86
  -1 -16   4   13.12    0.66
   0 -15   5    9.07    0.71
   0  -5  11    4.50    0.46
   1  -4   9  685.01    1.63
   2  -8   8   17.06    0.66
   3 -11   1  103.08    0.84
   3 -11   2   19.93    0.58
   3  -9   5   90.40    0.87
  -3 -14  12   -0.34    0.56
  -1 -16   5   11.32    0.65
   0 -13   9   56.03    0.98
   0 -12  10   40.80    1.05
   1 -14   5    3.53    0.67
   1 -13   7    5.01    0.73
   1 -11   9    3.47    0.76
   1  -8  10   20.18    0.73
   1  -7  10    3.05    0.57
   2 -13   1   56.01    0.80
   2 -13   3  104.49    1.01
   2  -9   8   17.87    0.72
   2  -6   8    6.72    0.47
   3 -11   0  140.29    0.93
   3 -11   3    8.38    0.59
  -4 -11  15   15.61    0.63
  -2 -14  11    0.23    0.62
  -2 -13  12    0.97    0.65
   0 -15   6   -0.04    0.73
   0 -14   8   21.59    0.79
   1  -6  10   18.03    0.58
   2 -13   0   23.95    0.70
   2 -13   4   37.43    0.80
   2 -12   6   10.20    0.74
   3 -10   5  312.66    1.47
   3  -8   6   49.12    0.73
   3  -7   6  271.47    1.22
  -2 -15  10    0.67    0.59
  -2  -8  14    2.98    0.78
  -1  -8  13    9.94    0.82
  -1  -7  13    1.64    0.77
   2 -10   8  196.65    1.35
   2  -5   8  308.89    1.21
   3 -11   4  112.59    1.01
   3  -9   6   10.81    0.64
  -2  -9  14    3.39    0.77
  -1 -14  10   17.29    0.76
  -1 -13  11    2.09    0.68
  -1  -9  13   40.35    1.01
   0 -11  11    1.68    0.77
   0  -4  11   51.48    0.65
   1 -10  10   40.34    0.91
   1  -5  10    8.42    0.51
   3 -11  -1    9.65    0.50
   3  -6   6  271.53    1.15
  -3 -12  14    1.60    0.59
  -3  -9  15  116.04    1.09
  -1  -6  13  115.75    1.05
   0  -8  12   12.91    0.83
   1 -13   8   27.66    0.85
   1 -12   9   75.58    1.07
   3 -12   1  314.13    1.40
   3 -12   2   11.62    0.61
   3 -12   3   92.10    1.02
   3 -11   5    1.41    0.65
   3 -10   6    1.43    0.65
   4  -8   1  335.72    1.12
   4  -8   2   50.02    0.57
  -2 -10  14  181.84    1.35
  -1 -16   7   55.79    0.83
  -1 -15   9    5.88    0.64
  -1 -10  13  181.99    1.49
   0 -13  10   51.86    0.95
   0  -9  12   22.08    0.82
   1 -15   2  101.60    1.00
   1 -15   3    7.09    0.66
   2 -12   7    1.14    0.73
   2 -11   8   -0.64    0.73
   2  -7   9   15.55    0.64
   3  -5   6  338.54    1.19
   4  -9   1  202.75    0.96
   4  -8   3   35.16    0.56
  -3 -10  15    1.85    0.67
   0 -16   4   16.57    0.72
   0 -14   9    8.53    0.71
   0  -6  12   97.97    0.94
   1 -15   4  117.69    1.08
   1 -14   7  106.65    1.11
   1 -11  10   55.72    0.99
   2 -14   2   75.69    0.99
   2 -14   3    0.26    0.72
   2 -13   6   13.47    0.77
   2  -9   9   60.15    0.94
   2  -6   9  104.86    0.92
   3  -8   7   39.91    0.75
   3  -7   7    2.52    0.52
   4  -9   3   92.02    0.81
  -2 -14  12   14.11    0.66
   0 -12  11   30.12    0.88
   0 -10  12  181.92    1.39
   1 -15   5    4.06    0.74
   1  -8  11  247.55    1.44
   1  -7  11   12.89    0.77
   2  -4   8  222.62    0.97
   3 -11   6    6.14    0.72
   3  -9   7   13.99    0.71
   4  -8   4  196.14    1.07
   4  -7   4  125.16    0.84
  -2 -11  14   -0.06    0.69
   0 -16   5    4.83    0.62
   0 -15   8    5.97    0.71
   1  -9  11   22.63    0.81
   1  -4  10   10.47    0.44
   2 -10   9   30.45    0.87
   3 -12   5   68.68    0.96
   3 -10   7    2.83    0.71
   4  -9   4   46.34    0.72
  -3 -11  15   10.89    0.64
  -1 -14  11   57.75    0.87
   0  -5  12  329.47    1.42
   1 -13   9    4.42    0.74
   1  -6  11  150.16    1.07
   2 -13   7  108.97    1.15
   2 -12   8   33.13    0.90
   2  -5   9   18.88    0.51
   3 -13   2   29.59    0.80
   4 -10   0   34.86    0.54
   4  -6   4   33.12    0.51
  -1 -15  10    1.93    0.58
  -1 -13  12    6.93    0.68
   0 -16   6   36.41    0.77
   0 -11  12   -0.17    0.75
   1 -15   6   11.77    0.72
   1 -14   8   43.72    0.88
   1 -12  10   -0.38    0.74
   2 -11   9   59.30    1.01
   3 -13   1    3.69    0.59
   3  -5   7  190.65    0.98
   4 -11   2    4.68    0.64
   4 -10   4  112.74    1.00
   4  -8   5  186.35    1.12
   4  -7   5  186.34    1.05
   0 -14  10   26.01    0.82
   0 -13  11    8.20    0.83
   2  -8  10  112.12    1.09
   3 -11   7    7.27    0.76
   3  -9   8   34.08    0.84
   3  -8   8    5.85    0.66
   4 -10  -1   24.03    0.51
   4  -9   5  249.27    1.33
  -2 -12  14   44.97    0.82
  -1 -12  13   30.82    0.84
   0 -16   7    5.05    0.65
   1  -5  11  119.68    0.91
   2  -7  10   12.59    0.66
   4 -11   0    1.16    0.44
   4 -10   5   65.21    0.90
   4  -6   5   96.53    0.76
  -2  -9  15   19.81    0.79
   0 -15   9    1.02    0.62
   0  -8  13    0.87    0.73
   2 -13   8   37.77    1.01
   2 -10  10   40.08    1.05
   2  -6  10   66.52    0.88
   3 -10   8    2.74    0.75
   3  -6   8  112.81    0.91
   4 -11   4   34.80    0.79
   4  -8   6  152.22    1.11
  -1 -10  14    5.46    0.83
   0  -9  13    3.93    0.80
   1 -14   9    4.37    0.79
   1 -13  10   37.41    0.87
   2 -15   2   29.63    0.75
   2 -15   3   44.34    0.83
   2 -15   4   25.30    0.81
   2 -12   9   14.71    0.82
   2  -4   9  199.23    0.97
   4  -9   6    8.87    0.69
   4  -7   6   16.35    0.59
  -2 -10  15    5.41    0.68
  -1 -14  12    2.28    0.61
   0 -10  13   23.62    0.95
   0  -6  13  179.70    1.30
   1  -8  12    8.25    0.73
   1  -3  10   63.45    0.59
   2 -14   7    5.32    0.70
   3 -12   7  182.99    1.39
   3 -11   8  302.21    1.76
   3  -4   7 1080.48    2.06
   4 -12   1   24.68    0.66
   4 -12   3   85.74    0.98
   4 -11  -1   35.49    0.60
   4 -11   5   26.49    0.81
   4 -10   6    6.60    0.85
   4  -5   5  127.97    0.80
   1 -16   5   87.96    0.93
   1 -15   8   11.34    0.74
   1 -12  11    5.24    0.74
   1  -9  12   56.99    0.98
   1  -7  12   25.30    0.74
   2 -15   5    6.16    0.70
   3 -14   2   34.61    0.80
   3  -5   8  140.89    0.91
   4  -6   6  241.47    1.17
  -1 -11  14   69.82    0.97
   0 -14  11    0.66    0.63
   1 -10  12    8.18    0.76
   1  -4  11  262.72    1.21
   2  -5  10    9.54    0.52
   3 -14   4    0.65    0.66
   3  -7   9   79.15    0.93
   5  -8   1   89.76    0.69
   5  -8   2    5.28    0.44
  -2 -11  15   16.58    0.68
   0 -15  10    0.34    0.56
   0 -13  12    5.65    0.74
   0 -11  13  121.54    1.24
   1 -16   6    0.70    0.59
   1  -6  12   26.91    0.75
   2 -15   6   58.12    0.95
   2 -13   9   16.85    0.79
   2  -8  11    9.61    0.85
   3 -10   9   23.47    0.86
   4 -12   5    2.39    0.72
   4 -11   6   17.15    0.81
   4  -9   7  107.77    1.10
   4  -8   7  124.01    1.09
   4  -7   7  214.62    1.25
   5  -9   1   89.89    0.74
   5  -9   3   50.53    0.74
   5  -8   3  101.69    0.84
   5  -7   2  130.15    0.80
   2 -12  10    4.18    0.87
   2  -9  11   48.22    0.93
   2  -7  11  104.42    1.11
   3 -13   7   21.74    0.82
   3 -12   8   14.11    0.82
   3  -6   9  175.74    1.13
   4 -10   7   47.07    0.94
   4  -5   6    8.06    0.46
   5 -10   1    4.71    0.48
   5 -10   2   34.85    0.69
   5  -9   0    4.03    0.38
   5  -8   0    0.74    0.32
   5  -7   3   16.70    0.49
   1 -16   7   22.91    0.71
   1 -14  10    0.97    0.67
   1 -13  11    1.91    0.76
   1 -11  12  205.23    1.45
   4 -13   1   22.18    0.71
   4 -13   3   23.87    0.77
   5 -10   0  105.55    0.85
   5 -10   3    4.19    0.61
   5  -9   4   74.09    0.88
   5  -7   4   81.65    0.78
  -1 -12  14    9.27    0.58
   0 -12  13    2.35    0.71
   1  -5  12  376.84    1.59
   2  -6  11   19.00    0.73
   2  -3   9   46.32    0.54
   3  -4   8    2.71    0.40
   4 -13   4    1.60    0.68
   4 -12   6  104.44    1.15
   5 -10   4   85.33    0.97
   5  -6   3  271.74    1.12
   2  -4  10   15.48    0.49
   3  -5   9   86.37    0.88
   4 -13   0   58.26    0.82
   4 -11   7   63.53    1.03
   4  -8   8   11.35    0.85
   5 -11   1   11.41    0.59
   5  -8   5  228.38    1.30
   0  -9  14   89.60    1.16
   0  -8  14  194.46    1.41
   2 -16   4   26.67    0.70
   2 -14   9    9.65    0.76
   3 -15   2   51.39    0.84
   3 -15   3   -0.25    0.63
   3 -15   4    2.78    0.70
   3 -13   8   22.78    0.82
   3  -8  10    9.39    0.75
   4  -9   8    1.38    0.74
   5 -11   0  381.93    1.52
   5 -11   4  201.88    1.42
   5 -10  -1  180.56    0.99
   5 -10   5   46.51    0.99
   5  -6   4    9.19    0.46
   1  -9  13   38.37    1.00
   1  -8  13    8.48    0.78
   2 -16   5   25.90    0.69
   2 -13  10    1.10    0.70
   3 -14   7   23.56    0.77
   3 -12   9   12.18    0.80
   3 -10  10    2.21    0.78
   3  -7  10   39.40    0.81
   4 -10   8  203.56    1.46
   4  -5   7  319.37    1.32
  -1 -10  15    1.90    0.58
   1  -7  13   24.90    0.81
   2 -15   8    4.29    0.62
   3 -15   5    7.93    0.71
   4 -14   2  160.75    1.26
   4 -14   3    3.60    0.76
   4 -13   6    1.71    0.85
   4 -12   7   13.97    0.82
   4  -6   8    4.24    0.69
   5 -12   1    9.40    0.69
   5 -12   2   28.14    0.76
   5 -12   3   10.80    0.82
   5  -9   6  103.18    1.10
   5  -8   6   53.54    0.88
   5  -6   5   26.26    0.60
   1 -14  11    9.64    0.65
   2 -16   6   32.29    0.72
   2  -9  12    7.29    0.88
   2  -8  12   53.05    1.03
   3 -11  10   24.54    0.86
   3  -6  10   -0.98    0.59
   4 -11   8   52.01    1.00
   5 -11  -1  416.45    1.55
   5 -11   5    4.15    0.74
   5 -10   6    0.91    0.87
   5  -7   6  246.50    1.35
   5  -5   4   60.20    0.63
   1  -6  13   19.37    0.84
   2 -10  12   67.66    1.11
   2  -7  12    3.82    0.76
   3 -15   6   50.18    0.90
   3  -4   9    3.36    0.48
   1 -11  13    9.97    0.76
   3 -14   8    4.47    0.70
   3 -13   9    7.11    0.71
   3  -3   8  183.42    0.90
   4 -14   5   26.14    0.79
   4  -9   9  118.38    1.21
   2 -14  10    1.71    0.65
   2  -3  10   29.90    0.56
   3 -12  10    1.22    0.71
   4 -13   7   66.52    1.00
   4 -12   8  132.06    1.26
   4 -10   9   -0.82    0.76
   4  -7   9  285.08    1.54
   4  -5   8   43.01    0.68
   4  -4   7    9.70    0.44
   5 -12   5    4.17    0.75
   5 -11   6   56.07    1.00
   5  -9   7   75.06    1.05
   5  -8   7    3.18    0.72
   5  -6   6   58.87    0.78
   5  -5   5   98.31    0.80
   6  -8   2  137.69    0.95
   2 -15   9    7.07    0.60
   2 -13  11    6.35    0.70
   2 -11  12   40.95    0.89
   2  -6  12  148.28    1.19
   2  -4  11   35.03    0.71
   3  -9  11   18.18    0.84
   3  -8  11   40.44    0.90
   5 -13   3   10.07    0.72
   5 -12  -1   13.85    0.68
   5 -10   7  262.57    1.62
   5  -7   7    8.13    0.69
   6  -9   1   45.27    0.66
   6  -9   3  129.32    1.06
   6  -8   3   14.55    0.60
   1 -12  13   97.18    1.03
   3 -16   3   54.94    0.82
   3 -16   4    2.91    0.62
   3  -7  11    2.15    0.68
   4 -11   9    7.97    0.80
   4  -6   9  213.55    1.30
   5 -13   4    5.14    0.71
   5 -12   6   -0.07    0.88
   6 -10   1    1.05    0.52
   6 -10   3   45.01    0.84
   6  -9   0   56.45    0.65
   6  -9   4   27.23    0.78
   6  -8   0   23.85    0.46
   6  -8   4   11.41    0.76
   6  -7   2    3.16    0.44
   6  -7   3    1.82    0.49
   4 -15   2    4.40    0.66
   4 -15   3   30.64    0.79
   5 -11   7    2.07    0.79
   5  -5   6    3.78    0.50
   6 -11   2   31.32    0.87
   6 -10   0   82.60    0.80
   6 -10   4   41.26    0.87
   1  -9  14   66.93    1.06
   3 -16   5   36.89    0.71
   3 -14   9   60.57    0.91
   3  -6  11   94.35    1.05
   4 -15   4    0.46    0.64
   4 -13   8   13.26    0.75
   6 -11   1   15.56    0.66
   6  -7   0   29.98    0.45
   6  -7   4    5.03    0.57
   6  -6   2  282.03    1.16
   1 -10  14   15.92    0.84
   1  -8  14   28.97    0.87
   2  -5  12  106.60    1.02
   3 -15   8    1.77    0.57
   4 -15   5   14.15    0.68
   4 -14   7    6.26    0.71
   4 -12   9   -0.34    0.71
   4  -8  10  161.05    1.32
   4  -4   8  119.02    0.91
   5 -10   8   12.26    0.99
   5  -9   8  150.90    1.33
   5  -8   8   -0.68    0.74
   5  -4   5   17.83    0.48
   6 -11   0   17.80    0.70
   6 -11   4   39.20    0.90
   6 -10   5    1.33    0.89
   6  -9  -1  136.74    0.84
   6  -9   5   90.15    1.07
   6  -8   5   82.94    1.00
   6  -6   1  113.70    0.73
   6  -6   3  234.24    1.14
   2  -9  13    2.05    0.74
   2  -8  13    1.04    0.74
   3 -16   6   30.96    0.69
   3  -4  10   14.56    0.54
   3  -3   9  103.85    0.78
   4  -7  10    6.96    0.71
   4  -5   9   10.31    0.60
   5 -14   2    1.40    0.66
   5 -14   3   58.99    0.95
   5 -12   7   66.74    1.05
   6 -12   2   13.24    0.84
   6 -10  -1   10.39    0.49
   6  -7   5  217.46    1.31
   1 -11  14   12.52    0.73
   2 -10  13    3.21    0.74
   2  -7  13    5.63    0.81
   4 -15   6   14.20    0.74
   4 -11  10   11.04    0.91
   4  -3   7   10.36    0.41
   5 -14   1   32.70    0.80
   5 -14   4    5.08    0.71
   5 -11   8   51.59    1.01
   6 -12   1    8.87    0.67
   6 -12   3  107.32    1.12
   6 -11   5    7.98    0.80
   3  -9  12    7.75    0.81
   3  -8  12   51.15    1.03
   3  -5  11   20.49    0.77
   4 -13   9   16.32    0.83
   6 -11  -1    9.50    0.63
   6 -10   6   14.50    0.88
   6  -9   6    8.49    0.80
   6  -8   6   12.78    0.79
   2 -11  13    5.76    0.72
   3 -14  10    9.47    0.63
   3 -10  12   11.42    0.81
   4 -14   8    1.66    0.64
   4  -6  10  156.72    1.21
   5 -14   5   16.66    0.76
   5  -6   8   95.14    1.03
   6 -12   0  280.82    1.47
   6  -9  -2    0.62    0.37
   6  -8  -2  272.15    1.02
   6  -7   6   16.47    0.75
   6  -6   5  175.93    1.16
   6  -5   2    0.17    0.38
   6  -5   3  316.40    1.26
   3 -13  11    0.78    0.68
   3  -7  12   15.53    0.82
   4 -12  10    1.04    0.73
   5 -13   7   22.45    0.80
   5 -12   8    0.85    0.73
   5  -9   9    0.28    0.80
   6 -12   5   13.13    0.82
   6 -11   6  170.16    1.41
   6 -10  -2  369.07    1.41
   6  -5   4  161.76    1.01
   3 -11  12   50.74    0.95
   4 -16   3   30.05    0.73
   4 -16   4   46.90    0.78
   4  -9  11   50.63    1.06
   4  -4   9   34.58    0.71
   5 -14   6    6.95    0.73
   5 -10   9  101.73    1.20
   5  -7   9   67.34    1.11
   6 -13   1   78.02    1.03
   6 -13   2    8.54    0.71
   6  -9   7  124.84    1.28
   3  -6  12   84.34    1.10
   4  -8  11   83.49    1.10
   4  -3   8   17.35    0.52
   5 -15   3    0.77    0.68
   5 -11   9    0.92    0.75
   5  -5   8    4.51    0.70
   6 -13   4  101.63    1.13
   6 -10   7    6.23    0.84
   6  -8   7   22.56    0.87
   6  -6   6   71.57    0.92
   6  -5   5    7.61    0.62
   7  -9   1    0.85    0.54
   7  -8   2   41.51    0.73
   3  -3  10    6.57    0.53
   4 -14   9    9.20    0.69
   4  -7  11    5.21    0.84
   4  -5  10   31.66    0.74
   5 -15   2   49.07    0.83
   5  -4   7   87.27    0.81
   6 -13   0   35.83    0.86
   6  -7   7   11.52    0.78
   7 -10   1   10.63    0.64
   7 -10   3   15.75    0.78
   7  -9   0   11.31    0.60
   7  -8   3   40.90    0.80
   3 -12  12    4.43    0.65
   3  -4  11    5.80    0.58
   4 -13  10   30.32    0.80
   5 -14   7   20.30    0.80
   5 -13   8   18.49    0.79
   5  -6   9    4.18    0.69
   6 -11   7  111.74    1.24
   7 -10   0    1.09    0.54
   7 -10   4    1.07    0.76
   7  -9   4  165.65    1.32
   7  -8   0   13.94    0.48
   7  -8   4    6.67    0.72
   7  -7   1  247.16    1.16
   7  -7   2   21.99    0.61
   7  -7   3   32.46    0.73
   2  -9  14   11.66    0.76
   3  -2   9  144.66    0.86
   5 -15   5    0.75    0.62
   5 -12   9   20.41    0.80
   2 -10  14    1.18    0.72
   2  -8  14   53.46    0.96
   3  -9  13   10.71    0.86
   4  -6  11    0.53    0.65
   5  -9  10   51.51    1.00
   5  -3   6   79.18    0.71
   6 -14   2   27.18    0.80
   6 -13   6   23.18    0.91
   6 -12   7   36.75    0.92
   6 -10   8   67.40    1.10
   6  -9   8   28.13    0.94
   6  -5   6   20.08    0.67
   6  -4   4   27.99    0.55
   7 -11   0  265.99    1.42
   7 -10   5   26.60    0.92
   7  -8   5   84.23    1.09
   7  -7   0   90.22    0.72
   7  -6   2    0.95    0.47
   3 -10  13   14.98    0.78
   3  -8  13   50.18    1.01
   3  -5  12   94.21    1.04
   6 -14   1    3.37    0.69
   7 -12   1    6.86    0.81
   7 -12   2   32.63    0.86
   7 -12   3    4.69    0.87
   7 -10  -1    4.88    0.51
   7  -8  -1   20.58    0.47
   7  -6   1  502.15    1.54
   4  -4  10   16.80    0.69
   5 -14   8    7.26    0.71
   5 -11  10   48.60    0.93
   5  -7  10   83.54    1.09
   5  -5   9   -0.33    0.62
   5  -4   8   19.19    0.62
   6 -11   8   16.45    0.85
   6  -4   5   19.74    0.57
   7  -7   5   16.74    0.80
   7  -6   4   30.90    0.74
   3  -7  13   21.21    0.82
   4  -9  12   68.78    1.04
   4  -8  12   24.72    0.92
   4  -3   9    1.81    0.45
   6 -14   5    4.84    0.70
   6  -5   7  127.07    1.17
   7 -12   0  188.34    1.35
   7 -11  -1   94.97    0.96
   7  -9   6    6.84    0.85
   4 -10  12    2.93    0.75
   4  -5  11  154.81    1.28
   5 -16   3    1.72    0.56
   5  -6  10   10.83    0.87
   5  -3   7   43.83    0.63
   6 -12   8   45.72    1.02
   7  -6   5  178.22    1.28
   4 -11  12   10.92    0.75
   4  -7  12    0.38    0.85
   5 -12  10    1.77    0.68
   6 -14   6   12.88    0.72
   6 -10   9    3.44    0.83
   7 -13   1   17.60    0.85
   7 -13   2   98.99    1.11
   7 -11   6   53.76    1.04
   7 -10  -2   36.98    0.67
   7  -7   6    3.49    0.78
   7  -5   3   32.94    0.65
   4  -2   8  381.28    1.32
   5  -9  11   21.17    0.95
   6 -15   2    0.12    0.62
   6 -15   3    5.15    0.69
   7 -12  -1  115.69    1.08
   7  -9   7    7.40    0.87
   7  -5   1  156.26    0.90
   5 -10  11   62.84    1.03
   5  -8  11   15.04    0.82
   5  -4   9   43.36    0.82
   6 -15   4    5.58    0.62
   6 -11   9   32.48    0.88
   6  -7   9   86.42    1.13
   6  -3   4   77.40    0.71
   7 -13   0   97.49    1.10
   7 -11  -2   30.08    0.72
   7 -10   7   28.59    0.96
   7  -8   7   10.14    0.87
   7  -6   6   43.09    0.91
   8 -10   1   60.29    1.00
   8  -9   1   32.49    0.75
   8  -9   3   87.18    1.09
   8  -8   2   29.77    0.78
   4  -6  12    3.69    0.82
   5  -7  11    1.03    0.86
   6 -14   7    0.88    0.66
   6 -13   8   25.78    0.80
   6  -5   8  184.59    1.30
   7 -13   5   42.95    0.89
   7 -11   7   30.14    0.92
   7  -7   7    3.92    0.81
   7  -5   5   18.97    0.70
   8 -10   3   13.02    0.82
   8  -9   0   10.86    0.68
   8  -9   4   10.00    0.98
   5  -3   8  194.25    1.11
   6 -12   9    1.59    0.75
   6  -4   7    5.03    0.58
   8 -11   1    3.35    0.70
   8 -11   2   11.23    0.77
   8 -10   0   62.24    0.87
   8  -8   0   78.83    0.81
   8  -7   1  785.33    2.14
   8  -7   2    6.40    0.64
   8  -7   3    9.79    0.73
   3  -9  14   14.59    0.75
   4  -4  11   40.01    0.87
   4  -3  10   48.03    0.72
   6  -6   9   13.72    0.79
   7 -14   2   -0.30    0.68
   7 -14   3    4.67    0.70
   7  -4   2   25.59    0.58
   8 -11   0    4.85    0.75
   4  -9  13   16.73    0.83
   5  -6  11   14.80    0.90
   6  -8  10   32.61    0.92
   7 -14   1   69.14    0.95
   7 -14   4    2.52    0.69
   7 -13   6   21.63    0.82
   7 -12   7   21.84    0.81
   7 -10   8   96.93    1.21
   7  -9   8   37.50    1.00
   7  -8   8    8.25    0.87
   7  -4   3   69.93    0.76
   8 -12   2   57.59    1.07
   8 -10  -1    0.68    0.64
   8 -10   5   49.05    1.05
   8  -9  -1  409.80    1.57
   8  -9   5    6.61    0.86
   8  -8   5    5.88    0.84
   4 -10  13   16.56    0.75
   4  -8  13   12.52    0.81
   4  -2   9  145.58    0.95
   6  -3   6    3.12    0.47
   7 -11   8    1.79    0.87
   7  -4   4    1.01    0.51
   8 -12   1    1.94    0.69
   8 -11   5    0.26    0.93
   8  -8  -1   62.67    0.71
   8  -6   1   76.68    0.80
   5  -2   7   41.84    0.58
   6 -13   9   11.40    0.67
   6  -7  10    0.58    0.77
   7 -14   5   31.66    0.79
   8 -12   0    4.49    0.77
   8 -11  -1  260.57    1.50
   8  -9   6    1.36    1.02
   8  -7   5  134.12    1.31
   8  -6   4  121.18    1.17
   4  -7  13  106.72    1.21
   5 -10  12   17.17    0.78
   5  -9  12   25.15    0.83
   5  -4  10    0.39    0.69
   6  -5   9   15.18    0.77
   7  -4   5  126.37    1.04
   8 -10   6   58.61    1.10
   8  -8   6    6.40    0.88
   5  -8  12    6.79    0.78
   6 -12  10   32.50    0.76
   7 -14   6   10.95    0.71
   7 -12   8   18.31    0.80
   7  -6   8    3.42    0.93
   7  -5   7   74.13    1.02
   8 -13   2    0.91    0.73
   8 -12   5   31.50    0.88
   8 -11   6    0.80    0.78
   8 -10  -2    3.96    0.64
   8  -9  -2   18.89    0.55
   5  -7  12   38.20    0.98
   5  -5  11    8.34    0.77
   6  -6  10   19.88    0.84
   6  -3   7    3.97    0.54
   7 -15   2   34.44    0.76
   7 -10   9   13.01    0.80
   8 -13   1   31.94    0.86
   8  -7   6    9.57    0.88
   8  -6   5   53.05    1.00
   8  -5   3  228.36    1.35
   6  -9  11   29.71    0.95
   8 -13   0   49.90    0.96
   8 -11  -2    0.07    0.68
   8  -9   7   10.08    0.90
   8  -5   1  100.05    0.86
   8  -5   4   21.54    0.77
   9  -9   2   56.97    1.00
   5  -2   8   17.56    0.52
   6 -10  11    1.35    0.72
   6  -8  11   51.50    1.01
   6  -2   5   25.44    0.53
   7  -7   9   10.53    0.84
   7  -3   3   58.46    0.70
   8 -13   5   29.68    0.90
   8 -12   6   61.22    1.01
   8  -8   7   36.65    1.03
   8  -7  -2    0.97    0.36
   8  -6   6    2.32    0.95
   9 -10   1    4.22    0.71
   9 -10   3   63.27    1.08
   9  -8   2    9.37    0.77
   5  -6  12    3.47    0.84
   6 -11  11   95.68    1.07
   6  -4   9   16.30    0.71
   7  -3   4   13.01    0.56
   8 -11   7   23.74    0.86
   8  -5   0   98.38    0.79
   8  -5   5   34.59    1.00
   9 -11   1   20.55    0.93
   9 -11   2   13.42    0.81
   9 -10   0    9.19    0.81
   9  -9   0   23.95    0.73
   6  -7  11   41.98    0.98
   6  -5  10    5.35    0.71
   6  -3   8    0.48    0.64
   7 -12   9   15.04    0.71
   7  -4   7  252.06    1.48
   8 -14   2   74.30    0.99
   8  -9  -3   23.74    0.64
   9 -10   4    4.88    0.85
   9  -8   0  114.67    1.02
   9  -8   4    1.22    0.85
   9  -7   1    2.10    0.64
   9  -7   2    2.73    0.72
   9  -7   3    6.79    0.81
   5  -4  11  384.20    1.82
   5  -3  10   14.40    0.72
   6  -2   6   52.58    0.67
   7  -6   9   77.70    1.12
   8 -14   1    5.68    0.66
   8 -14   4   28.63    0.77
   8 -12   7   13.56    0.76
   9 -11   0    2.29    0.68
   9 -11   4    1.80    0.78
   9  -9  -1    3.20    0.59
   9  -9   5   53.32    1.14
   7  -9  10    1.88    0.77
   7  -8  10   16.39    0.96
   8 -10   8    4.35    0.78
   8  -8   8   22.93    0.96
   8  -4   3   69.45    0.87
   9 -12   1    2.23    0.76
   9 -12   3    5.14    0.75
   9 -10  -1   69.64    0.91
   9 -10   5   11.21    0.89
   9  -8  -1  294.66    1.38
   9  -7   4    2.56    0.85
   5  -9  13    4.80    0.62
   5  -8  13   66.03    1.00
   6  -6  11    1.37    0.79
   8 -14   5   23.57    0.72
   8 -11   8    1.77    0.73
   8  -4   1  193.80    1.09
   9 -12   0    7.32    0.83
   9 -11   5   18.32    0.85
   9  -6   1    3.07    0.61
   5  -2   9   14.15    0.58
   5  -1   7   33.69    0.60
   6  -2   7   24.80    0.65
   7  -7  10   17.61    0.89
   9  -9   6   90.12    1.26
   9  -7   5   10.20    0.92
   9  -6   4   10.01    0.86
   6  -9  12    8.60    0.75
   6  -4  10   14.57    0.86
   7  -5   9   47.36    0.97
   7  -4   8    1.98    0.70
   8  -4   0  178.70    0.98
   8  -4   5   13.98    0.75
   9 -13   2   25.53    0.86
   9 -12   5   67.08    1.07
   9  -8   6   20.30    0.99
   9  -6   0    1.53    0.53
   6  -3   9    9.55    0.65
   8 -12   8    1.97    0.63
   8  -5   7    7.15    0.81
   9 -13   1   26.01    0.84
   9 -13   3    6.07    0.74
   9 -11   6   46.73    0.97
   9  -8  -2   15.38    0.55
   6  -5  11  126.25    1.30
   7  -6  10   10.12    0.83
   7  -3   7  120.21    1.08
   7  -2   3  432.15    1.50
   8  -8   9    3.77    0.94
   8  -6   8   26.00    0.94
   9 -13   4   15.75    0.75
   9 -11  -2    4.14    0.67
   9  -7   6   21.03    0.98
   9  -5   1    2.02    0.58
   7  -9  11   12.40    0.79
   8 -11   9   12.18    0.76
   9 -12   6    0.67    0.73
   9 -10   7   47.45    0.98
  10 -10   1   12.69    0.91
  10  -9   2   48.71    1.02
   5  -1   8  251.11    1.20
   6  -2   8  274.34    1.36
   7 -10  11    8.57    0.67
   7  -8  11    2.40    0.77
   7  -2   5  303.83    1.38
   8  -7   9   45.25    1.00
   8  -3   2    0.55    0.49
   9 -13   5   63.05    0.93
   9  -6   6   16.34    0.95
   9  -5   0  223.96    1.21
  10 -10   0   16.69    0.89
  10  -9   0    1.10    0.67
  10  -8   1    7.58    0.77
  10  -8   3    2.96    0.86
   7  -4   9    9.32    0.73
   9  -9  -3  171.94    1.15
   9  -7   7   56.02    1.13
   9  -5   5   33.37    0.96
  10 -11   1    4.08    0.74
  10  -9   4    0.28    0.86
  10  -8   0  546.34    2.04
 -14   0  16   28.67    0.93
 -14   1  14    1.16    0.94
  -9  -5  10    2.46    0.53
 -13  -2  16   -0.21    0.76
 -13   1  11    0.73    0.82
 -12  -3  18    0.62    0.70
 -11  -4  18    3.55    0.66
 -14   1  18    3.96    0.64
 -12   5   9    3.67    0.64
 -14   1  16    1.49    0.74
 -14   1  17   25.27    0.80
 -13   7  13    5.35    0.68
 -10  -5  14    0.25    0.68
 -14   2  16   57.89    0.94
 -14   2  18   29.89    0.70
 -12  -3  16    1.38    0.72
 -12   0  10    1.75    0.67
 -10   3   6    0.17    0.41
  -8  -5   9  147.30    0.84
 -14   3  16    1.96    0.66
 -14   3  17   30.54    0.76
 -13   7  14    2.64    0.68
 -11  -4  16    0.62    0.66
 -11  -2  10    3.95    0.58
 -13  -1  16   24.73    0.81
 -13   5  12   13.77    0.74
 -11   1   8   47.27    0.70
 -12   1  10   12.29    0.68
  -9  -2   7   75.98    0.63
 -13   7  16    2.80    0.56
 -11   2   8    3.86    0.50
 -11   4   8    0.99    0.56
  -9  -5  12   19.51    0.61
  -8  -4   8   56.77    0.54
 -13   0  15  196.90    1.37
 -13   0  17   18.13    0.76
 -13   1  19   24.20    0.58
 -13   5  13   18.59    0.70
 -13   6  14   15.96    0.71
 -10  -4  12   87.66    0.82
 -10  -3  10   52.48    0.66
 -10  -1   8  104.55    0.75
 -11  -3  18   53.71    0.75
 -10  -2   9   24.68    0.52
 -10   1   7    7.94    0.41
  -9  -5  13    8.28    0.55
  -8  -5  10    3.97    0.34
 -13   1  18    2.61    0.56
 -13   2  19   18.06    0.55
 -13   3  13   33.22    0.81
 -12  -1  19   17.70    0.54
 -12   6  11    1.68    0.52
 -12   7  12   22.43    0.71
 -10  -4  17   10.42    0.60
 -10   5   7  229.59    1.04
 -13   1  15   56.30    0.90
 -13   1  16   22.24    0.81
 -13   1  17    8.30    0.67
 -13   5  14   18.43    0.66
 -13   6  16    4.98    0.57
 -13   6  17   31.20    0.64
 -12   1  11  330.00    1.48
 -12   8  14   27.35    0.67
 -11  -3  17   40.46    0.73
 -11   1   9  109.88    0.88
 -11   6   9    9.81    0.51
  -9  -5  14    6.76    0.50
 -13   2  18    1.15    0.49
 -12  -1  18    6.12    0.59
 -11  -3  15   40.37    0.75
 -11  -2  19    6.15    0.46
 -10  -4  14   50.68    0.70
 -10  -4  15    1.54    0.62
 -10  -4  16  247.43    1.28
 -10  -3  11  190.78    1.04
 -10   3   7   18.75    0.44
 -10   4   7    0.48    0.36
  -9  -1   7  101.65    0.65
  -9   1   6   24.62    0.41
  -7  -5   9  119.12    0.65
 -13   2  15    4.74    0.65
 -13   2  17   13.67    0.58
 -13   5  16   12.37    0.67
 -12  -1  14    4.44    0.65
 -12   2  11    5.74    0.59
 -12   4  11    5.40    0.66
 -12   8  16   24.86    0.58
 -11  -2  12   22.60    0.64
 -11   5   9    1.75    0.52
 -11   7  10   54.02    0.73
 -10  -3  19   29.51    0.57
 -10   0   8  186.61    0.91
  -8  -5  11    4.88    0.38
 -13   3  15    1.07    0.60
 -13   3  16   16.08    0.71
 -13   3  17   25.84    0.62
 -13   4  16    3.96    0.63
 -13   4  17   35.18    0.66
 -12   7  13   14.45    0.64
 -11  -1  11  135.75    0.95
 -11   2   9    8.05    0.48
  -9  -4  11    7.50    0.41
  -9  -2   8    4.89    0.33
  -9   5   6   40.98    0.50
  -8  -4   9    9.17    0.33
 -12   1  12   47.41    0.78
 -11  -2  18    2.96    0.53
 -11   4   9  110.48    0.82
 -10  -2  10  100.06    0.74
 -10  -1   9   73.78    0.65
 -12   0  18    0.78    0.53
 -12   7  14    7.38    0.60
 -10  -3  12   10.20    0.50
 -10  -3  18    0.85    0.51
  -9   3   6  370.73    1.11
  -9   4   6  198.75    0.84
  -8  -5  12    2.92    0.42
 -12   0  14   37.54    0.76
 -12   1  19   14.90    0.49
 -12   2  12   26.55    0.68
 -12   5  12    9.88    0.57
 -11   6  10    2.15    0.49
 -10   1   8   95.60    0.68
  -9  -4  12    4.44    0.46
  -9   0   7  382.28    1.09
  -8  -3   8    7.91    0.29
 -12   0  16   17.46    0.64
 -12   1  13   86.23    0.90
 -12   3  12   31.29    0.69
 -12   6  13   13.71    0.57
 -12   7  15  102.10    0.87
 -12   7  16   45.22    0.68
 -12   7  17    2.44    0.44
 -11  -2  15   51.32    0.76
 -11  -2  16   65.47    0.80
 -11  -1  12   97.95    0.86
 -11  -1  19   25.42    0.51
 -11   0  11  144.67    0.94
 -11   2  10    3.77    0.54
 -11   7  11    3.78    0.48
 -10   2   8  237.68    0.98
 -10   5   8   28.93    0.52
  -8  -4  10    4.30    0.33
 -12   1  14    3.37    0.60
 -12   1  18    4.32    0.45
 -12   2  13   40.35    0.74
 -12   6  18   16.67    0.50
 -11   5  10   37.04    0.60
 -10  -2  19   22.25    0.51
 -10   7   9    0.67    0.44
  -9  -1   8   33.72    0.43
 -12   1  15  138.32    1.06
 -12   1  16   81.57    0.86
 -12   1  17    4.88    0.52
 -12   3  13  150.01    1.06
 -12   4  19    0.28    0.39
 -12   6  15   14.41    0.63
 -11  -1  13  155.65    1.03
 -11   4  10   33.00    0.58
 -11   8  13   13.21    0.55
 -10  -1  10  103.16    0.73
 -10   4   8  197.67    0.90
  -9   1   7   90.60    0.57
 -12   2  14   99.04    0.94
 -12   2  18    9.93    0.48
 -12   5  14   11.98    0.57
 -12   6  16   21.28    0.61
 -11  -1  14   82.25    0.91
 -10  -1  20   28.53    0.45
  -9  -2  20   46.96    0.52
  -9   6   7  375.94    1.15
 -12   2  15   41.08    0.74
 -12   2  17   13.34    0.55
 -12   3  14   49.56    0.76
 -12   3  18    0.53    0.45
 -12   4  18    4.68    0.48
 -12   5  15   19.68    0.68
 -11  -1  15  120.40    1.03
 -11   8  14   20.67    0.59
 -10   1   9   69.70    0.65
 -12   3  15    6.43    0.58
 -12   4  15    5.06    0.64
 -11   2  11   40.28    0.64
 -11   2  20    8.82    0.41
 -10   6   9    1.67    0.40
 -12   3  16    1.58    0.52
 -11   0  13  124.89    0.95
 -11   3  11   31.91    0.66
 -11   5  11   35.78    0.60
 -11   8  16    0.01    0.42
 -10  -1  11   18.74    0.49
 -10   0  10   60.53    0.60
  -9   5   7    0.95    0.27
  -7  -4   9    7.82    0.26
 -11   1  12   93.24    0.83
 -11   1  19   23.32    0.50
 -11   6  12   65.66    0.77
 -11   7  18   10.93    0.49
 -10  -2  17    5.77    0.49
 -10  -1  19    6.02    0.42
 -10   0  20    7.61    0.38
  -9   4   7   11.78    0.33
 -11   0  17    1.65    0.49
 -10   5   9   11.24    0.41
 -10   7  10    0.75    0.40
 -10   8  11   -0.85    0.42
  -9  -3  17    6.11    0.49
  -9  -2  19    6.98    0.45
 -11   0  15   90.69    0.88
 -11   1  18   18.60    0.57
 -11   2  12   21.01    0.59
 -11   7  17    6.66    0.49
 -10   4   9    5.99    0.38
  -8  -4  16    2.52    0.46
 -11   5  12    3.64    0.48
 -11   5  19    8.40    0.46
 -11   6  13   15.92    0.63
 -11   6  18    1.12    0.46
 -11   7  16   20.61    0.60
 -10   1  10  103.83    0.74
  -9  -3  15   33.49    0.66
  -9  -3  16   97.21    0.80
  -9  -1  20   22.10    0.41
  -8  -4  13    6.04    0.38
  -8  -4  15    2.15    0.48
 -11   1  14   78.82    0.85
 -11   1  17   23.83    0.59
 -11   4  19    6.42    0.43
  -9   1   8   31.89    0.41
  -8  -4  14   29.06    0.53
 -11   1  15  116.94    0.97
 -11   1  16   52.88    0.75
 -11   2  18    2.83    0.43
 -10  -1  17    7.53    0.58
 -10   8  12    1.35    0.43
  -9  -2  18    6.81    0.49
  -8  -3  18    0.90    0.42
 -11   2  14   28.91    0.74
 -11   2  17   11.04    0.61
 -11   3  13   20.92    0.62
 -11   4  18    4.15    0.46
 -11   6  15   39.63    0.71
 -11   6  16  155.13    1.00
 -10  -1  14   29.86    0.72
 -10   2  10   94.45    0.72
 -10   2  20   11.52    0.43
  -9   0   9   26.92    0.42
  -9   2   8    5.06    0.31
 -11   5  14    5.86    0.55
 -11   5  17    0.36    0.47
 -10   0  12  309.02    1.28
 -10   3  10   43.25    0.59
 -10   4  10   66.10    0.71
 -10   5  10    7.14    0.43
 -10   8  13    1.51    0.53
  -9  -1  19   15.83    0.49
  -9   5   8    9.90    0.40
  -8  -3  11   30.93    0.45
  -8  -1   8    0.85    0.24
 -11   4  14    5.56    0.57
 -10   1  11   18.71    0.51
 -10   1  19    6.05    0.44
 -10   3  20    5.10    0.41
 -10   8  17   13.37    0.49
  -9  -2  17    3.87    0.47
  -9   4   8   11.65    0.39
  -8  -2  19    0.96    0.42
 -11   3  15   38.37    0.72
 -11   4  15   24.07    0.66
 -11   4  16   -0.04    0.52
 -10   6  11    5.07    0.46
 -10   7  12    1.55    0.50
 -10   8  14    9.81    0.58
  -9  -2  13    4.83    0.56
 -10   2  11   34.57    0.60
 -10   2  19   21.98    0.55
 -10   7  18   -0.34    0.44
 -10   8  15   13.40    0.55
  -9  -1  11    3.05    0.40
  -9   1   9  142.77    0.77
 -10   0  16    9.05    0.58
 -10   1  18    3.16    0.46
 -10   5  11    2.01    0.46
 -10   5  19   78.69    0.78
  -9  -2  15   11.29    0.55
  -8  -3  16    8.27    0.52
 -10   3  11  188.19    1.04
 -10   4  19   20.25    0.55
 -10   7  17   19.47    0.60
  -9   0  19    9.50    0.48
  -9   9  17   16.75    0.48
  -7  -4  14   16.66    0.54
  -7  -3  18   19.22    0.53
 -10   1  13  145.86    1.05
 -10   1  17    7.67    0.56
 -10   2  12  630.96    1.87
 -10   2  18   35.70    0.69
 -10   6  12    3.11    0.50
 -10   7  14   49.89    0.80
 -10   7  16    6.83    0.63
  -9  -1  12   48.03    0.70
 -10   1  16    1.62    0.68
 -10   7  15   20.33    0.65
  -9  -1  17    2.61    0.51
  -9   2  20   52.72    0.62
  -9   5   9    0.32    0.38
  -9   7  10  131.35    0.89
  -9   8  11  115.15    0.86
  -9   9  16   10.86    0.50
  -8   5   7  231.84    0.90
 -10   1  15    3.60    0.63
 -10   3  12   11.68    0.59
 -10   6  13   86.30    0.88
  -9  -1  13   18.32    0.64
  -9   0  11  140.17    0.91
  -9   1  10  114.14    0.80
  -9   3  20   40.17    0.64
  -9   4   9  123.16    0.80
  -9   9  14   43.47    0.70
  -9   9  15    0.34    0.50
  -8  -1  19    1.97    0.43
  -8   0  20   37.96    0.54
  -8   4   7    1.84    0.30
  -6  -4  10    4.75    0.29
 -10   2  17    5.64    0.57
 -10   6  14   30.72    0.79
  -9  -1  16    1.97    0.56
  -9   4  20   11.42    0.53
  -8  -2  17    5.37    0.54
 -10   2  15   56.82    0.88
 -10   2  16   56.55    0.85
 -10   3  17   45.09    0.77
 -10   4  13    3.16    0.73
 -10   4  17   11.19    0.70
 -10   5  17  127.16    1.04
 -10   6  15    3.37    0.60
  -9   8  12   66.03    0.84
  -9   8  17   23.33    0.66
  -8   1   8    1.41    0.32
 -10   3  14   15.93    0.73
 -10   3  16  165.53    1.21
 -10   5  16   22.04    0.73
  -9   2  10  180.73    1.02
  -9   2  19    8.08    0.58
  -9   6  10    0.43    0.45
  -9   6  19   84.42    0.88
  -9   7  11    3.22    0.58
  -8  -2  12   40.92    0.62
  -8  -2  16   51.73    0.86
  -8  -1  10  210.73    0.99
  -8   1  20   51.18    0.66
  -7  -3  11   21.91    0.45
 -10   4  15    1.57    0.68
  -9   1  11    3.10    0.52
  -9   1  18   37.52    0.77
  -9   8  16    5.48    0.66
  -8  -1  18    1.45    0.53
  -7  -3  16    4.81    0.65
  -6  -4  11   96.39    0.66
  -9   0  13   62.12    0.88
  -9   3  19    1.71    0.56
  -9   4  19   91.37    0.94
  -9   5  10    2.55    0.49
  -9   5  19    1.29    0.58
  -9   8  15   10.69    0.75
  -8  -2  14  139.37    1.08
  -8  -2  15  259.34    1.38
  -8   2   8   17.37    0.44
  -7  -3  12  396.86    1.45
  -7  -2  18    0.20    0.52
  -9   0  15    5.95    0.72
  -8   2  20   71.34    0.81
  -8   9  17   11.70    0.64
  -7  -3  15  102.68    0.94
  -7  -1  19    0.46    0.55
  -6  -4  12  308.78    1.21
  -6  -4  14  218.10    1.18
  -6  -2  19   12.54    0.55
  -6  -1  20    2.76    0.47
  -9   1  17    3.05    0.66
  -9   2  18    9.19    0.63
  -9   6  18    3.08    0.70
  -8  -1  17    4.38    0.62
  -8   3  20   49.09    0.83
  -7  -3  13   84.16    0.84
  -7  -3  14   57.85    0.80
  -9   3  18   10.58    0.70
  -8   4  20    2.99    0.64
  -8   8  18   76.42    0.98
  -7  -2  10    2.63    0.40
  -6  -3  17   36.24    0.80
  -9   1  16    1.13    0.75
  -9   4  18    5.96    0.71
  -8  -1  16   49.31    1.04
  -8   0  18  196.14    1.28
  -8   9  16   32.20    0.84
  -7  -2  17   10.36    0.72
  -8   9  13   15.59    0.91
  -7   1  20   69.44    0.87
  -9   2  16    4.60    0.86
  -9   3  17    8.28    0.82
  -9   6  13    3.81    0.97
  -8   6  19   20.01    0.85
  -8   8  17    1.65    0.89
  -8   9  14    1.53    0.80
  -7  -1   9   21.91    0.53
  -7   0  19   10.16    0.72
  -7  10  16   -0.85    0.68
  -6  -3  10    3.73    0.48
  -5  -1  20  119.53    0.99
  -9   6  14    0.21    1.00
  -8   3  19    7.52    0.83
  -8   5  19   83.80    1.19
  -8   7  18    5.05    0.79
  -7  -2  16   40.91    0.91
  -6  -2  18   46.60    0.85
  -6   0  20  136.63    1.06
  -9   3  16  152.75    1.42
  -8   4  19   -0.30    0.75
  -6  -1  19    7.66    0.65
  -9   3  15   57.26    1.13
  -8   8  12   36.40    1.02
  -8   8  16    8.25    0.87
  -7   3  20   14.04    0.77
  -8   1  17    4.56    0.90
  -8   2  18   13.67    0.77
  -7   4  20    2.70    0.74
  -7   9  17    8.80    0.75
  -8   0  14  192.86    1.51
  -8   3  18    2.65    0.89
  -8   8  15    4.10    0.90
  -7  -1  10  792.86    2.14
  -7   8  18    7.30    0.83
  -5  -4  13    4.90    0.66
  -8   4  18    4.77    0.81
  -7   0   9   98.75    0.85
  -8   1  16   48.86    1.02
  -8   2  17    5.92    0.80
  -8   7  16    5.65    0.87
  -7   2  19    2.80    0.66
  -7   6  19   14.78    0.88
  -7   9  16   43.05    1.08
  -6  -1  18    1.34    0.76
  -5  -1  19   30.74    0.81
  -8   1  15   19.41    0.93
  -8   7  12    0.80    0.76
  -7   3  19    6.29    0.87
  -7   0  17   74.77    1.02
  -7   4  19   39.85    0.98
  -7   5  19    0.40    0.83
  -6   3  20   49.23    0.94
  -8   5  11    7.20    0.72
  -7   9  12   11.04    0.79
  -6  -2  10   78.42    0.75
  -6   4  20    1.66    0.74
  -4   0  20  351.33    1.61
  -8   4  16    2.88    0.96
  -8   5  16   21.07    0.93
  -8   6  12    5.07    0.75
  -7   1   9   23.61    0.56
  -7   2  18   -0.57    0.80
  -7   8  10   35.60    0.79
  -6   1  19    7.62    0.68
  -6   7  19    1.76    0.72
  -7   4   8  398.72    1.47
  -7   6  18   29.70    0.98
  -6  -2  11   35.35    0.69
  -6   0  18    9.25    0.65
  -6   8  18    7.06    0.80
  -6   9  17    8.45    0.71
  -6  10  15   -0.62    0.70
  -5  -3  15    3.68    0.66
  -4  -2  18   78.09    0.94
  -4  -1  19   35.92    0.77
  -8   5  14   52.48    1.14
  -7   1  17    1.15    0.68
  -7   3  18   27.20    0.83
  -7   5  18    2.39    0.78
  -5  -1  18   25.30    0.77
  -5   0  19    1.26    0.60
  -5   2  20    5.85    0.68
  -7   4  18    7.33    0.78
  -6  -2  12    7.49    0.55
  -6   6  19    3.02    0.76
  -5   3  20    8.49    0.79
  -4   1  20    6.05    0.66
  -7   1  10  686.99    1.94
  -7   2  17   10.81    0.71
  -7   6  17   46.73    1.11
  -7   8  12   44.72    0.92
  -6  -1  16    2.77    0.64
  -6   3  19  122.91    1.20
  -6   5  19    1.95    0.79
  -5  -3  11    1.13    0.40
  -5  -3  13    4.75    0.59
  -5   4  20   35.38    0.88
  -4  -4  11    7.64    0.42
  -7   0  13   81.41    0.97
  -7   1  16  155.70    1.23
  -6   4  19    5.06    0.78
  -6   9  16    5.80    0.75
  -5  -3  12   17.97    0.52
  -5  -2  16  121.29    1.09
  -7   3  17   -0.32    0.69
  -7   4  17    1.84    0.73
  -6   8  17   24.25    0.88
  -5   1  19   30.42    0.76
  -5  10  16    3.08    0.67
  -4   2  20   29.97    0.83
  -3  -1  19    0.06    0.58
  -7   1  15   87.87    1.01
  -7   2  10    2.40    0.48
  -7   2  16   32.80    0.80
  -7   6  16    4.06    0.92
  -7   7  11   27.94    0.71
  -4  -2  17   26.18    0.75
  -7   6  10   29.81    0.65
  -6   2  18   42.07    0.81
  -6   6  18    5.54    0.79
  -5  -1  17    2.53    0.57
  -5   8  18    1.85    0.63
  -5   9  17    6.02    0.69
  -4  -3  15   54.50    0.81
  -4  -1  18   14.04    0.66
  -7   2  15   93.34    1.10
  -7   3  16    4.79    0.69
  -7   4  16    5.94    0.74
  -7   5  10   89.76    0.89
  -7   5  16   33.26    0.89
  -6   0  16  187.18    1.21
  -6   3  18    1.97    0.66
  -6   5  18   62.09    1.01
  -6   9  11   16.59    0.73
  -6   9  14   37.78    0.93
  -5  -2  15  138.66    1.05
  -5   6  19    3.96    0.72
  -7   2  11  204.63    1.16
  -7   6  11   18.83    0.63
  -6   4  18  121.88    1.19
  -6   8   9   19.51    0.55
  -6   8  16   52.55    0.97
  -5   3  19    3.24    0.71
  -5   5  19    1.59    0.73
  -7   2  12    4.30    0.56
  -7   2  14   21.54    0.73
  -7   5  15  157.90    1.26
  -7   6  12   37.32    0.86
  -5  -2  14   61.09    0.84
  -5   1  18   23.09    0.75
  -5   4  19   53.84    0.98
  -4   1  19   34.76    0.77
  -3   0  19   61.85    0.87
  -7   2  13   28.58    0.73
  -7   3  11   26.03    0.63
  -7   4  11  209.03    1.19
  -7   4  15   35.38    0.83
  -7   6  13  199.13    1.32
  -6   2  17    0.62    0.59
  -6   6  17   15.85    0.81
  -6   8  15   18.67    0.90
  -5  -1  16  183.14    1.16
  -5   7  18   13.34    0.80
  -5   9  16   21.63    0.84
  -5  10  14  127.84    1.14
  -4  -3  14   79.68    0.81
  -7   3  12  434.46    1.66
  -7   3  13   82.33    0.92
  -7   3  14   56.37    0.86
  -7   4  14   20.23    0.73
  -7   5  13    6.77    0.67
  -7   5  14    5.78    0.69
  -6   0  10  114.97    0.79
  -6   8  10  133.82    1.02
  -5  -2  11  222.36    1.06
  -5  -2  13  150.30    0.99
  -5   0  17    7.15    0.56
  -5   8  17   11.11    0.79
  -4  -2  16   46.27    0.75
  -4  10  16    6.64    0.65
  -3  -2  17   43.09    0.74
  -3  -1  18   26.69    0.70
  -7   4  13    6.67    0.64
  -6   4  17   -0.67    0.68
  -6   5  17   56.71    0.98
  -6   8  14   93.09    1.13
  -5  -2  12   16.38    0.50
  -5   2  18   37.86    0.77
  -5   6  18    6.79    0.86
  -5  10  13    4.38    0.71
  -4  -3  13   17.76    0.57
  -4   0  18   22.59    0.66
  -4   6  19   28.75    0.83
  -6   0  12   52.54    0.76
  -6   7   9   26.39    0.53
  -6   8  11   19.02    0.68
  -5  -1  15    0.06    0.62
  -4  -3  11  409.43    1.30
  -4  -3  12    3.79    0.46
  -4   3  19   36.07    0.91
  -4   9  17    6.47    0.62
  -6   1  15   23.08    0.67
  -6   2  16   55.26    0.81
  -6   6  16   27.97    0.85
  -6   7  15   10.58    0.73
  -6   8  12   50.25    0.79
  -5   3  18  184.47    1.30
  -5   4  18    8.07    0.85
  -5   5  18  182.49    1.39
  -4   4  19    0.96    0.75
  -4   5  19    0.71    0.70
  -3  -3  15    5.03    0.52
  -3   1  19    0.29    0.60
  -6   1  10    8.60    0.43
  -6   5  16   69.59    0.98
  -5   8  16    1.41    0.77
  -4  -2  15   48.33    0.69
  -4   1  18   13.39    0.69
  -6   1  14   55.18    0.76
  -6   4  16   60.40    0.90
  -6   6   9    7.21    0.41
  -6   7  10    1.11    0.45
  -6   7  14   76.03    1.05
  -5  -1  14   59.59    0.73
  -4   7  18   37.38    0.87
  -4  10  15  104.76    1.01
  -3   2  19   55.70    0.92
  -1   0  19  132.38    1.02
  -6   1  11   36.71    0.58
  -6   1  13  607.43    1.84
  -6   2  15  104.64    0.95
  -6   6  15   36.38    0.85
  -5   2  17   53.73    0.79
  -5   6  17  155.50    1.40
  -5   9  14   33.91    0.80
  -4  -1  16   21.13    0.64
  -3  -2  16    3.39    0.55
  -3   6  19   39.79    0.83
  -2   1  19   68.91    0.93
  -6   1  12  156.84    0.99
  -6   3   9  296.91    1.13
  -6   5   9  117.50    0.78
  -6   5  15   78.04    0.96
  -6   7  11   13.65    0.57
  -6   7  12  140.77    1.06
  -6   7  13  435.93    1.76
  -5  -1  13   21.89    0.55
  -5   8   8   12.12    0.47
  -5   9  10  223.29    1.20
  -4  -2  14   84.89    0.83
  -4   6  18    3.81    0.82
  -4   8  17   49.14    0.90
  -4   9  16   34.80    0.80
  -3  -1  17  139.62    1.02
  -3   5  19    5.00    0.78
  -3  10  16    0.39    0.57
  -6   2  10   58.60    0.61
  -6   2  14   66.51    0.80
  -6   4  15   13.34    0.68
  -6   6  10   61.51    0.68
  -5  -1  11  233.41    1.04
  -5  -1  12  299.45    1.23
  -5   0  15    6.23    0.53
  -5   4  17   24.17    0.78
  -5   5  17    8.11    0.75
  -5   8  15   18.50    0.74
  -5   9  12   18.94    0.76
  -5   9  13    1.84    0.63
  -4  10  14  173.05    1.24
  -3   4  19    5.99    0.75
  -3   9  17   19.49    0.66
  -6   2  11   27.18    0.54
  -6   2  13   38.80    0.67
  -6   3  14    8.84    0.59
  -6   5  14    5.34    0.74
  -4   3  18   24.72    0.77
  -4   4  18  129.86    1.30
  -4   5  18   12.53    0.77
  -2   2  19    5.48    0.71
  -6   2  12    6.30    0.49
  -6   3  10    3.29    0.40
  -6   4  14  192.01    1.19
  -6   5  10    2.48    0.42
  -6   6  11   36.19    0.64
  -6   6  12   40.86    0.72
  -4  -2  13  550.31    1.63
  -4  -1  15   12.90    0.59
  -4   1  17   13.94    0.58
  -4   7  17   56.78    1.04
  -4  10  13    9.94    0.71
  -3  -3  13   51.23    0.65
  -3   1  18   24.57    0.69
  -3   7  18    8.84    0.67
  -2   0  18   41.56    0.76
  -1   1  19   17.07    0.66
  -6   3  11  828.11    1.98
  -6   3  13   13.16    0.57
  -6   4  10    5.89    0.43
  -6   4  13   72.93    0.89
  -6   5  13    5.36    0.58
  -5   1  15   -0.27    0.59
  -5   6  16   40.97    0.89
  -5   8   9   85.78    0.76
  -5   8  14   32.94    0.80
  -4   0  16  149.20    1.03
  -4   9  15   43.64    0.85
  -3  -2  15   25.30    0.64
  -2   5  19   24.23    0.82
  -6   3  12   38.10    0.64
  -6   4  11  102.99    0.82
  -6   5  12    0.30    0.52
  -4  -2  11    6.09    0.40
  -4  -2  12  390.24    1.32
  -4   8  16   72.84    0.98
  -3   0  17    5.99    0.61
  -3  10  15    1.16    0.59
  -2  -2  16   20.75    0.61
  -2  -1  17    2.35    0.58
  -2   4  19   -0.66    0.67
  -1   2  19    0.63    0.69
  -5   4  16    1.20    0.64
  -5   7   8   68.57    0.60
  -5   8  10   51.12    0.70
  -5   8  13  128.15    1.08
  -4   6  17   15.56    0.80
  -3  -3  12   28.20    0.48
  -3  -1  16   12.67    0.52
  -3   6  18   33.17    0.90
  -3   9  16   16.06    0.74
  -2   9  17    1.68    0.53
  -2  10  16   17.69    0.59
  -5   0  11    2.66    0.38
  -5   1  14   61.25    0.79
  -5   8  11   38.63    0.72
  -5   8  12   34.03    0.70
  -4  -1  14    1.11    0.45
  -4   3  17   64.23    0.99
  -4   5  17   91.25    1.20
  -4   9  14    3.05    0.73
  -3   3  18   28.85    0.81
  -3   5  18   29.86    0.85
  -2   1  18    7.91    0.71
  -1   3  19    2.39    0.68
  -5   7  14   14.04    0.70
  -4   4  17    4.18    0.71
  -4   7  16   46.47    1.04
  -3   4  18    0.18    0.71
  -2   7  18    9.32    0.65
  -2  11  14   -0.71    0.55
  -1   4  19    0.62    0.62
  -5   3  15    3.76    0.57
  -5   7   9   14.73    0.47
  -3  -2  14   68.73    0.69
  -3   1  17  126.84    0.99
  -3   7  17    3.84    0.81
  -3  10  14    3.58    0.61
  -5   1  13   18.51    0.54
  -5   2  14   46.69    0.68
  -5   6   8   69.21    0.58
  -5   6  14    4.71    0.65
  -5   7  13   60.34    0.85
  -4  -1  13  124.27    0.84
  -2   2  18   37.53    0.81
  -2   6  18   13.13    0.82
   0   0  18   54.73    0.82
  -5   1  10   79.40    0.64
  -5   1  12  272.37    1.16
  -5   7  10    3.05    0.44
  -5   7  12   53.78    0.76
  -4   2  16   39.61    0.70
  -4   6  16   37.94    0.90
  -3   8  16   43.94    0.87
  -3   9  15  114.51    1.14
  -2  -2  15    3.24    0.53
  -1   1  18   57.90    0.91
  -1   7  18   67.67    0.91
  -1  10  16   15.56    0.56
  -5   1  11  240.15    1.06
  -5   2  13  111.21    0.90
  -5   3  14   82.38    0.83
  -5   5  14  123.75    1.04
  -5   7  11   96.13    0.85
  -4   0  14   80.30    0.81
  -4   3  16    2.31    0.71
  -4   5  16    3.49    0.86
  -4   8  14    2.22    0.76
  -4   9  12   57.61    0.80
  -3  -2  13  162.26    0.94
  -3   6  17   12.59    0.80
  -3  10  13    3.06    0.67
  -2  -3  13  190.39    0.97
  -2  -1  16    1.47    0.47
  -2   3  18    8.99    0.73
  -2   4  18    8.35    0.88
  -2   5  18    0.66    0.74
  -2   9  16   40.80    0.80
  -4  -1  11   36.68    0.49
  -4   4  16   21.77    0.76
  -4   9  10  181.88    1.05
  -4   9  11   77.13    0.85
  -3   3  17   -0.61    0.79
  -3   5  17   24.14    1.00
  -5   2  10   11.38    0.39
  -5   2  12   15.51    0.49
  -5   3  13    4.17    0.49
  -5   5  13  102.48    0.92
  -5   6  10  121.25    0.82
  -3   4  17  164.57    1.34
  -2   7  17    2.95    0.79
  -1   2  18   48.09    0.91
  -1   6  18    8.99    0.71
   0   1  18   -0.47    0.65
  -5   2  11  168.87    0.91
  -5   4  13    4.36    0.52
  -5   5   9    0.61    0.33
  -4   2  15   39.64    0.67
  -4   6  15   11.97    0.75
  -3  -2  12   33.10    0.49
  -3   1  16   14.81    0.57
  -3   7  16  102.35    1.15
  -3   9  14   59.07    0.97
  -2   1  17    2.76    0.59
  -1   0  17    1.87    0.62
  -5   4   9   18.47    0.41
  -5   4  12    0.97    0.46
  -5   5  12  145.63    0.98
  -4   1  14    0.83    0.53
  -4   8   8  183.55    0.91
  -3  -1  14    1.61    0.43
  -3   0  15  108.40    0.88
  -3   8  15  114.07    1.14
  -2  -3  12    7.51    0.37
  -2  -2  14   19.03    0.55
  -1   4  18    4.21    0.76
  -1   5  18    2.39    0.72
  -5   3  11    0.95    0.39
  -5   4  10    3.14    0.37
  -5   4  11  422.99    1.42
  -4   3  15   47.20    0.75
  -4   4  15   47.10    0.81
  -4   5  15   19.03    0.76
  -4   8  12   32.08    0.79
  -3   6  16   -0.67    0.89
  -2   0  16   12.33    0.61
  -2   6  17    7.38    0.77
  -2   9  15   20.83    0.84
  -1  -2  15   19.94    0.59
  -1  -1  16    6.53    0.59
  -1   9  16    2.52    0.61
  -1  10  15    1.05    0.54
   0   2  18    1.83    0.71
   0   6  18   20.76    0.70
  -4   8   9   20.59    0.52
  -3   2  16    3.57    0.58
  -2  -3  11  149.66    0.78
   0   8  17    4.31    0.61
  -4   2  14   71.30    0.75
  -4   6  14    3.85    0.67
  -4   8  10    3.06    0.44
  -3  -1  13   10.02    0.51
  -3   3  16   28.09    0.76
  -3   5  16   20.31    0.85
  -3   9  13   22.98    0.72
  -2   3  17  129.66    1.23
  -2   4  17    6.33    0.80
  -2   5  17  103.37    1.22
  -1   1  17   21.81    0.71
  -1   7  17    6.40    0.74
  -1  11  13    0.35    0.59
   0   4  18   15.98    0.78
   0   5  18    0.92    0.66
   1   2  18   -0.50    0.68
  -4   1  13  110.75    0.81
  -3   4  16    1.27    0.72
  -3   7  15   17.79    0.83
  -2  10  13   20.76    0.77
   0  11  14    1.57    0.48
  -4   3  14   64.51    0.77
  -4   5  14    0.72    0.62
  -4   7   8   40.50    0.51
  -4   7  12  332.22    1.51
  -2   1  16    1.02    0.53
  -2   7  16    5.83    0.77
  -1   6  17    2.75    0.86
   0   9  16   28.94    0.70
   0  10  15    1.49    0.58
   1   3  18    8.57    0.71
   1   5  18    3.09    0.62
  -4   1  12   58.09    0.62
  -4   2  13  498.93    1.55
  -2   9  14    3.78    0.79
  -1   2  17    6.67    0.73
   0   7  17   25.31    0.80
   1   0  17    4.63    0.64
  -4   7   9  154.79    0.87
  -4   7  11   12.30    0.53
  -3  -1  12   34.06    0.51
  -3   2  15   23.76    0.63
  -2   6  16  123.62    1.29
  -1   3  17   15.03    0.83
  -1   5  17   12.36    0.84
  -1   9  15    0.11    0.66
   0   1  17   24.12    0.80
  -4   1  10  200.70    0.90
  -4   1  11   37.75    0.52
  -4   3  13   15.11    0.54
  -4   4  13    5.32    0.53
  -4   5  13   36.65    0.71
  -4   7  10    1.46    0.43
  -3   3  15    6.71    0.62
  -3   5  15   44.39    0.91
  -3   8  13  130.81    1.12
  -3   9  11   78.42    0.85
  -2  10  12   61.24    0.87
  -1   4  17  151.86    1.40
   1   9  16   12.20    0.63
   1  11  14   12.39    0.56
  -4   2  12  347.20    1.26
  -3  -1  11    2.01    0.33
  -3   0  13  120.72    0.81
  -3   4  15   81.38    0.99
  -3   9   9    0.59    0.43
  -3   9  10    6.72    0.52
  -2  -2  12    2.03    0.34
  -2   3  16    4.91    0.72
  -2   4  16   41.71    1.08
  -2   5  16    7.66    0.84
   0   2  17   31.24    0.97
   0   6  17   10.43    0.80
   0  11  13  106.81    0.97
   1  -1  16    2.56    0.62
   1   7  17    4.72    0.62
   1  10  15   10.47    0.59
  -4   6  11   85.03    0.79
  -2   7  15  122.55    1.25
  -2  10  11   34.06    0.75
  -1   1  16    6.66    0.70
   1   1  17   47.51    0.92
  -4   2  11    6.19    0.39
  -4   3  12    3.52    0.43
  -4   4  12   61.48    0.70
  -4   6   9    6.91    0.38
  -4   6  10  154.58    0.91
  -3   2  14   70.79    0.75
  -3   8  12   60.72    0.85
  -2   1  15   69.25    0.77
  -2   8  14    2.63    0.85
  -2   9  13  131.62    1.15
  -1  10  13  175.35    1.27
   0   0  16    1.62    0.59
   0   4  17    0.20    0.93
   0   5  17   27.40    0.89
   2   1  17   86.87    1.08
  -4   2  10   48.34    0.53
  -4   3  11  341.59    1.23
  -4   5  11  275.96    1.19
  -2  -2  11    7.73    0.38
  -2  -1  13    2.33    0.39
  -2  10  10  415.68    1.61
  -1   6  16   11.61    0.86
   0   9  15   11.85    0.71
   0  10  14    5.14    0.63
   1   2  17   75.04    1.14
   1   6  17   14.29    0.76
   2  -1  16   34.43    0.73
   3   1  17    2.43    0.65
  -4   3  10    4.91    0.36
  -3   1  13    9.78    0.46
  -3   3  14   33.96    0.68
  -3   4  14    5.04    0.62
  -3   5  14   92.01    1.02
  -3   8  11   11.91    0.65
  -2   0  14    9.84    0.48
  -2   2  15    3.46    0.69
  -1  -3  11    0.47    0.34
  -1  -2  13  139.59    0.87
  -1   0  15   27.74    0.67
  -1   9  14   38.18    0.84
   1   5  17    3.64    0.83
   1   8  16    0.02    0.60
  -4   4   9   68.77    0.58
  -4   4  10  114.85    0.75
  -2   9  12    0.49    0.71
  -1   3  16    1.35    0.78
  -1   5  16   30.34    0.99
   0  -2  14    7.06    0.47
   0   7  16    0.78    0.71
   0  11  12   -0.63    0.62
   1   4  17   12.77    0.87
   2   2  17   85.08    1.12
   2   6  17    1.08    0.60
  -3   2  13  148.04    0.96
  -3   6  13   19.10    0.72
  -3   7  12  109.20    1.00
  -3   8   8    7.59    0.40
  -3   8   9  161.42    0.97
  -3   8  10  227.54    1.16
  -2   4  15   -1.26    0.71
  -2   5  15   20.52    0.88
  -2   7  14   -0.22    0.76
  -1   4  16    1.76    0.83
  -1  10  12    3.19    0.71
   0   1  16   24.74    0.77
   2   5  17    3.75    0.73
   2   8  16    0.76    0.61
   3   2  17  131.60    1.15
  -2  -1  12    0.46    0.41
  -2   8  13    3.03    0.69
  -1   7  15    0.24    0.79
   0   6  16   26.81    1.06
   1   9  15   11.03    0.65
   1  10  14   12.92    0.65
   2   3  17   91.87    1.14
   2   4  17    0.75    0.74
  -3   3  13   50.01    0.69
  -3   4  13  231.31    1.23
   0   2  16   18.14    0.82
   0  10  13   21.52    0.79
   1   7  16   11.04    0.79
   2   0  16    1.99    0.67
  -3   7  11    0.67    0.51
  -2   6  14   40.66    0.93
  -1  -2  12  212.69    0.97
  -1   9  13   38.29    0.86
   0   5  16  120.38    1.35
   1  -1  15    7.54    0.59
   1   1  16    1.61    0.83
   2   9  15   20.17    0.70
   2  11  13    5.31    0.57
  -3   1  11    1.98    0.34
  -3   7  10    4.48    0.55
  -2   2  14   19.37    0.60
  -2   9  10   69.72    0.85
  -1   6  15   84.83    1.20
  -1  10  11   85.81    0.95
   0   4  16  123.70    1.37
   1  -2  14   13.01    0.52
   2   7  16    2.88    0.71
   4   0  16  143.35    1.12
  -3   5  12   58.65    0.75
  -3   7   8  620.35    1.57
  -3   7   9    7.99    0.48
  -2  -1  11   72.16    0.59
  -2   3  14    2.44    0.60
  -2   5  14   34.77    0.88
  -2   8  12  870.04    2.48
  -1   5  15    0.75    0.84
   0  -2  13    5.37    0.48
   1   6  16   23.45    0.87
   1   8  15    6.90    0.82
  -3   1  10   93.20    0.64
  -3   3  12   25.54    0.54
  -2   4  14   13.38    0.73
  -2   9   8   12.16    0.52
  -2   9   9   53.20    0.70
  -1   3  15    1.80    0.73
  -1   7  14  106.33    1.33
   0   7  15   40.92    0.99
   1   2  16    5.78    0.81
   1   5  16  196.28    1.66
   2  -1  15    5.40    0.61
   3   7  16   10.35    0.64
   3  11  13   34.57    0.68
  -3   2  11  240.74    1.01
  -1  10  10   40.18    0.73
   0   1  15   31.99    0.75
   0  10  12  181.96    1.32
   1   9  14   69.94    1.03
   1  10  13    4.66    0.73
   2   6  16   38.41    0.91
   3  10  14    7.78    0.56
  -2   6  13   31.85    0.83
  -1  -2  11   11.53    0.35
  -1   8  13   10.06    0.77
   0   9  13    3.17    0.83
   1   0  15   10.76    0.65
   2   2  16   88.61    1.25
   2   8  15   24.21    0.85
   4   1  16    2.60    0.67
  -3   3  11   89.03    0.70
  -3   4  11  163.79    0.93
  -2   2  13   75.45    0.75
  -1   6  14   53.87    1.06
   1   7  15   18.54    1.00
   1  11  11   29.30    0.78
  -3   5  10   80.57    0.70
  -2   3  13  196.35    1.14
  -2   4  13   18.92    0.77
  -2   5  13  102.48    1.04
  -2   8  10    4.57    0.60
  -1  -1  12  344.08    1.22
   0   0  14   49.63    0.78
   1  -1  14   92.34    0.89
   2   4  16  109.13    1.29
   3   2  16   38.30    1.00
   4   2  16    7.94    0.78
   5   2  16    4.01    0.61
  -3   3  10  166.13    0.84
  -3   4  10   16.10    0.43
  -1   2  14  109.43    0.98
[truncated: 371,781 more chars]
