# Supplementary material for: A Tail Does Not Always Make a Difference: Assembly of cds Nets from Co(NCS)2 and 1,4-bis(n-Alkyloxy)-2,5-bis(3,2′:6′,3″-terpyridin-4′-yl)benzene Ligands
Source: Molecules. 2022 Aug 5;27(15):4995. doi: 10.3390/molecules27154995 (PMC9370426; doi:10.3390/molecules27154995)
Supplement: Supplementary file 1 [file molecules-27-04995-s001.zip › CAS_081_5_150K.cif]

data_cas_081_5_150k
_audit_creation_date               2021-10-19
_audit_creation_method
;
Olex2 1.5
(compiled 2021.10.07 svn.r9718050b for OlexSys, GUI svn.r6410)
;
_shelx_SHELXL_version_number       '2018/3'
loop_
  _audit_author_name
  _audit_author_email
  _audit_author_address
 'Capomolla, S.' simona.capomolla@unibas.ch
;
University of Basel
Department of Chemistry
Mattenstrasse 24a
Basel
Switzerland
;
 'Prescimone, A.' alessandro.prescimone@unibas.ch
;
University of Basel
Department of Chemistry
Mattenstrasse 24a
Basel
Switzerland
;

_audit_contact_author_address
;
University of Basel
Department of Chemistry
Mattenstrasse 24a
Basel
Switzerland
;
_audit_contact_author_email        alessandro.prescimone@unibas.ch
_audit_contact_author_name         'Prescimone, A.'
_audit_contact_author_phone        ''
_publ_contact_author_id_orcid      ''
_publ_section_references
;
Dolomanov, O.V., Bourhis, L.J., Gildea, R.J, Howard, J.A.K. & Puschmann, H.
 (2009), J. Appl. Cryst. 42, 339-341.

Sheldrick, G.M. (2008). Acta Cryst. A64, 112-122.

Sheldrick, G.M. (2015). Acta Cryst. C71, 3-8.
;
_chemical_name_common              ?
_chemical_name_systematic          ?
_chemical_formula_moiety           'C44 H36 Co N8 O2 S2, 3.5[C6H4Cl2]'
_chemical_formula_sum              'C65 H50 Cl7 Co N8 O2 S2'
_chemical_formula_weight           1346.33
_chemical_melting_point            ?
loop_
  _atom_type_symbol
  _atom_type_description
  _atom_type_scat_dispersion_real
  _atom_type_scat_dispersion_imag
  _atom_type_scat_source
 'C' 'C' 0.0181 0.0091 'International Tables Vol C Tables 4.2.6.8 and 6.1.1.4'
 'Cl' 'Cl' 0.3639 0.7018 'International Tables Vol C Tables 4.2.6.8 and 6.1.1.4'
 'Co' 'Co' -2.3653 3.6143
 'International Tables Vol C Tables 4.2.6.8 and 6.1.1.4'
 'H' 'H' 0.0000 0.0000 'International Tables Vol C Tables 4.2.6.8 and 6.1.1.4'
 'N' 'N' 0.0311 0.0180 'International Tables Vol C Tables 4.2.6.8 and 6.1.1.4'
 'O' 'O' 0.0492 0.0322 'International Tables Vol C Tables 4.2.6.8 and 6.1.1.4'
 'S' 'S' 0.3331 0.5567 'International Tables Vol C Tables 4.2.6.8 and 6.1.1.4'

_shelx_space_group_comment
;
The symmetry employed for this shelxl refinement is uniquely defined
by the following loop, which should always be used as a source of
symmetry information in preference to the above space-group names.
They are only intended as comments.
;
_space_group_crystal_system        'monoclinic'
_space_group_IT_number             14
_space_group_name_H-M_alt          'P 1 21/c 1'
_space_group_name_Hall             '-P 2ybc'
loop_
  _space_group_symop_operation_xyz
 'x, y, z'
 '-x, y+1/2, -z+1/2'
 '-x, -y, -z'
 'x, -y-1/2, z-1/2'

_cell_length_a                     14.7191(2)
_cell_length_b                     15.0949(2)
_cell_length_c                     16.6847(2)
_cell_angle_alpha                  90
_cell_angle_beta                   115.5830(10)
_cell_angle_gamma                  90
_cell_volume                       3343.62(8)
_cell_formula_units_Z              2
_cell_measurement_reflns_used      85974
_cell_measurement_temperature      150
_cell_measurement_theta_max        70.45
_cell_measurement_theta_min        2.94
_shelx_estimated_absorpt_T_max     0.665
_shelx_estimated_absorpt_T_min     0.337
_exptl_absorpt_coefficient_mu      5.556
_exptl_absorpt_correction_T_max    0.7974
_exptl_absorpt_correction_T_min    0.4929
_exptl_absorpt_correction_type     multi-scan
_exptl_absorpt_process_details
;
STOE X-Red32, absorption correction by Gaussian integration, analogous to
P. Coppens in: F. R. Ahmed (Editor), "Crystallographic Computing", Munksgaard,
Copenhagen (1970), 255 - 270. Afterwards scaling of reflection intensities was
performed within STOE LANA. J. Koziskova, F. Hahn, J. Richter, J. Kozisek, Acta
Chimica Slovaca, vol. 9, no. 2, 2016, pp. 136 - 140.
Finally a spherical absorption correction was done within STOE LANA.
;
_exptl_absorpt_special_details     ?
_exptl_crystal_colour              pink
_exptl_crystal_colour_primary      pink
_exptl_crystal_density_diffrn      1.337
_exptl_crystal_density_meas        ?
_exptl_crystal_density_method      ?
_exptl_crystal_description         plate
_exptl_crystal_F_000               1380
loop_
  _exptl_crystal_face_index_h
  _exptl_crystal_face_index_k
  _exptl_crystal_face_index_l
  _exptl_crystal_face_perp_dist
 22 17 -30 0.0765
 -7 4 15 0.0595
 9 30 16 0.0895
 3 -4 -15 0.0842
 -19 -14 30 0.0609
 16 -11 -30 0.0849

_exptl_crystal_size_max            0.25
_exptl_crystal_size_mid            0.143
_exptl_crystal_size_min            0.08
_exptl_transmission_factor_max     ?
_exptl_transmission_factor_min     ?
_diffrn_reflns_av_R_equivalents    0.0451
_diffrn_reflns_av_unetI/netI       0.0183
_diffrn_reflns_Laue_measured_fraction_full  0.990
_diffrn_reflns_Laue_measured_fraction_max  0.976
_diffrn_reflns_limit_h_max         17
_diffrn_reflns_limit_h_min         -16
_diffrn_reflns_limit_k_max         18
_diffrn_reflns_limit_k_min         -18
_diffrn_reflns_limit_l_max         20
_diffrn_reflns_limit_l_min         -16
_diffrn_reflns_number              52602
_diffrn_reflns_point_group_measured_fraction_full  0.990
_diffrn_reflns_point_group_measured_fraction_max  0.976
_diffrn_reflns_theta_full          67.686
_diffrn_reflns_theta_max           70.449
_diffrn_reflns_theta_min           3.329
_diffrn_ambient_temperature        150
_diffrn_detector                   'EIGER2 1M'
_diffrn_detector_area_resol_mean   13.33
_diffrn_detector_type              'DECTRIS EIGER2 1M'
_diffrn_measured_fraction_theta_full  0.990
_diffrn_measured_fraction_theta_max  0.976
_diffrn_measurement_device         'Eulerian 4-circle diffractometer'
_diffrn_measurement_device_type    'STOE STADIVARI Cu'
_diffrn_measurement_method         'rotation method, \w scans'
_diffrn_radiation_collimation      '1.2 0.6 mm diameter'
_diffrn_radiation_monochromator    'Graded multilayer mirror'
_diffrn_radiation_polarisn_norm    270
_diffrn_radiation_probe            x-ray
_diffrn_radiation_type             'Cu K\a'
_diffrn_radiation_wavelength       1.54186
_diffrn_source                     'Axo Cu'
_diffrn_source_current             1.00
_diffrn_source_power               0.050
_diffrn_source_voltage             50
_reflns_Friedel_coverage           0.000
_reflns_Friedel_fraction_full      .
_reflns_Friedel_fraction_max       .
_reflns_number_gt                  5968
_reflns_number_total               6247
_reflns_special_details
;
 Reflections were merged by SHELXL according to the crystal
 class for the calculation of statistics and refinement.
 
 Structure factors included contributions from the .fab file.
 
 _reflns_Friedel_fraction is defined as the number of unique
 Friedel pairs measured divided by the number that would be
 possible theoretically, ignoring centric projections and
 systematic absences.
;
_reflns_threshold_expression       'I > 2\s(I)'
_computing_cell_refinement
;
X-Area Recipe 1.36.0.0 (STOE, 2020)
;
_computing_data_collection
;
X-Area Pilatus3_SV 1.31.170.0 (STOE, 2020)
;
_computing_data_reduction
;
X-Area Integrate 1.78.3.0 (STOE, 2020)
X-Area LANA 1.83.8.0 (STOE, 2020)
;
_computing_molecular_graphics      'Olex2 1.5 (Dolomanov et al., 2009)'
_computing_publication_material
;
STOE & Cie GmbH, X-Area, software package for collecting single-crystal or
multi-domain crystal data on STOE area-detector diffractometers, for image 
processing, for the correction and scaling of reflection intensities and 
for outlier rejection, version 1.90, Darmstadt 2020
;
_computing_structure_refinement    'SHELXL 2018/3 (Sheldrick, 2015)'
_computing_structure_solution      'SHELXS  (Sheldrick, 2008)'
_refine_diff_density_max           0.574
_refine_diff_density_min           -0.714
_refine_diff_density_rms           0.140
_refine_ls_extinction_coef         .
_refine_ls_extinction_method       none
_refine_ls_goodness_of_fit_ref     1.052
_refine_ls_hydrogen_treatment      constr
_refine_ls_matrix_type             full
_refine_ls_number_parameters       259
_refine_ls_number_reflns           6247
_refine_ls_number_restraints       0
_refine_ls_R_factor_all            0.1178
_refine_ls_R_factor_gt             0.1150
_refine_ls_restrained_S_all        1.052
_refine_ls_shift/su_max            0.000
_refine_ls_shift/su_mean           0.000
_refine_ls_structure_factor_coef   Fsqd
_refine_ls_weighting_details      
 'w=1/[\s^2^(Fo^2^)+(0.1450P)^2^+19.0000P] where P=(Fo^2^+2Fc^2^)/3'
_refine_ls_weighting_scheme        calc
_refine_ls_wR_factor_gt            0.3133
_refine_ls_wR_factor_ref           0.3159
_refine_special_details
;
lots of disordered and not fully occupied C6H4Cl2 molecules were noted in the
difference map but it was not possible to refine them so the solvent
mask was used.
;
_olex2_refinement_description
;
1. Fixed Uiso
 At 1.2 times of:
  All C(H) groups, All C(H,H) groups
 At 1.5 times of:
  All C(H,H,H) groups
2.a Riding coordinates:
 C21(H21A,H21B,H21C)
2.b Secondary CH2 refined with riding coordinates:
 C19(H19A,H19B), C20(H20A,H20B)
2.c Aromatic/amide H refined with riding coordinates:
 C5(H5), C12(H12), C9(H9), C7(H7), C1(H1), C18(H18), C13(H13), C3(H3), C2(H2),
 C15(H15), C14(H14)
;
_atom_sites_solution_hydrogens     mixed
_atom_sites_solution_primary       direct
_atom_sites_solution_secondary     ?
loop_
  _atom_site_label
  _atom_site_type_symbol
  _atom_site_fract_x
  _atom_site_fract_y
  _atom_site_fract_z
  _atom_site_U_iso_or_equiv
  _atom_site_adp_type
  _atom_site_occupancy
  _atom_site_site_symmetry_order
  _atom_site_calc_flag
  _atom_site_refinement_flags_posn
  _atom_site_refinement_flags_adp
  _atom_site_refinement_flags_occupancy
  _atom_site_disorder_assembly
  _atom_site_disorder_group
 Co1 Co -1.000000 -0.500000 -1.000000 0.0278(3) Uani 1 2 d S . P . .
 S1 S -0.79156(15) -0.34912(18) -0.73445(14) 0.0841(8) Uani 1 1 d . . . . .
 N4 N -0.9352(3) -0.4102(3) -0.8964(3) 0.0318(9) Uani 1 1 d . . . . .
 N2 N -0.8212(3) -0.7489(3) -0.6285(3) 0.0290(9) Uani 1 1 d . . . . .
 N1 N -0.9958(3) -0.5990(3) -0.9057(3) 0.0304(9) Uani 1 1 d . . . . .
 O1 O -0.4609(3) -0.6779(3) -0.5068(3) 0.0488(11) Uani 1 1 d . . . . .
 C10 C -0.7392(4) -0.7634(3) -0.5528(3) 0.0317(11) Uani 1 1 d . . . . .
 C5 C -0.9180(4) -0.6059(3) -0.8252(4) 0.0319(11) Uani 1 1 d . . . . .
 H5 H -0.862382 -0.567012 -0.810886 0.038 Uiso 1 1 calc R U . . .
 C6 C -0.8233(4) -0.6761(3) -0.6753(3) 0.0310(11) Uani 1 1 d . . . . .
 C4 C -0.9144(4) -0.6671(3) -0.7619(4) 0.0339(11) Uani 1 1 d . . . . .
 C12 C -0.8354(4) -0.8810(3) -0.5161(3) 0.0285(10) Uani 1 1 d . . . . .
 H12 H -0.895144 -0.850484 -0.553647 0.034 Uiso 1 1 calc R U . . .
 C9 C -0.6599(4) -0.7058(4) -0.5193(4) 0.0358(12) Uani 1 1 d . . . . .
 H9 H -0.603847 -0.718167 -0.464391 0.043 Uiso 1 1 calc R U . . .
 C7 C -0.7461(4) -0.6137(3) -0.6449(3) 0.0323(11) Uani 1 1 d . . . . .
 H7 H -0.751544 -0.561095 -0.677952 0.039 Uiso 1 1 calc R U . . .
 C1 C -1.0734(4) -0.6551(4) -0.9253(4) 0.0389(12) Uani 1 1 d . . . . .
 H1 H -1.128023 -0.652621 -0.982828 0.047 Uiso 1 1 calc R U . . .
 C8 C -0.6614(4) -0.6285(3) -0.5664(4) 0.0324(11) Uani 1 1 d . . . . .
 C17 C -0.4771(4) -0.5915(4) -0.5023(4) 0.0352(12) Uani 1 1 d . . . . .
 C11 C -0.7424(4) -0.8448(3) -0.5052(3) 0.0336(11) Uani 1 1 d . . . . .
 C18 C -0.5987(4) -0.4740(3) -0.5298(4) 0.0340(11) Uani 1 1 d . . . . .
 H18 H -0.666995 -0.456103 -0.550358 0.041 Uiso 1 1 calc R U . . .
 C16 C -0.5782(4) -0.5636(4) -0.5327(4) 0.0365(12) Uani 1 1 d . . . . .
 C13 C -0.6574(4) -0.8907(4) -0.4506(4) 0.0418(13) Uani 1 1 d . . . . .
 H13 H -0.592990 -0.868639 -0.440775 0.050 Uiso 1 1 calc R U . . .
 C3 C -0.9948(4) -0.7233(4) -0.7847(4) 0.0439(14) Uani 1 1 d . . . . .
 H3 H -0.993397 -0.767860 -0.743995 0.053 Uiso 1 1 calc R U . . .
 C2 C -1.0768(5) -0.7165(4) -0.8648(4) 0.0515(16) Uani 1 1 d . . . . .
 H2 H -1.134511 -0.752696 -0.878703 0.062 Uiso 1 1 calc R U . . .
 C22 C -0.8754(4) -0.3835(4) -0.8280(4) 0.0368(12) Uani 1 1 d . . . . .
 C15 C -0.7587(4) -0.9978(3) -0.4240(4) 0.0338(12) Uani 1 1 d . . . . .
 H15 H -0.763845 -1.050565 -0.395220 0.041 Uiso 1 1 calc R U . . .
 C19 C -0.3673(5) -0.7060(4) -0.5052(4) 0.0454(14) Uani 1 1 d . . . . .
 H19A H -0.311227 -0.690314 -0.447405 0.055 Uiso 1 1 calc R U . . .
 H19B H -0.356182 -0.675562 -0.552775 0.055 Uiso 1 1 calc R U . . .
 C14 C -0.6645(4) -0.9699(4) -0.4091(4) 0.0401(13) Uani 1 1 d . . . . .
 H14 H -0.606167 -1.002498 -0.372219 0.048 Uiso 1 1 calc R U . . .
 C20 C -0.3695(6) -0.8040(4) -0.5187(5) 0.0580(17) Uani 1 1 d . . . . .
 H20A H -0.431213 -0.820359 -0.572087 0.070 Uiso 1 1 calc R U . . .
 H20B H -0.310559 -0.822002 -0.528819 0.070 Uiso 1 1 calc R U . . .
 C21 C -0.3676(7) -0.8517(5) -0.4398(6) 0.071(2) Uani 1 1 d . . . . .
 H21A H -0.306995 -0.836360 -0.388527 0.107 Uiso 1 1 d R U . . .
 H21B H -0.424985 -0.834780 -0.430217 0.107 Uiso 1 1 d R U . . .
 H21C H -0.369055 -0.914450 -0.449577 0.107 Uiso 1 1 d R U . . .
 N3 N -0.8447(3) -0.9562(3) -0.4765(3) 0.0294(9) Uani 1 1 d . . . . .

loop_
  _atom_site_aniso_label
  _atom_site_aniso_U_11
  _atom_site_aniso_U_22
  _atom_site_aniso_U_33
  _atom_site_aniso_U_23
  _atom_site_aniso_U_13
  _atom_site_aniso_U_12
 Co1 0.0317(6) 0.0207(6) 0.0281(6) -0.0020(4) 0.0102(5) 0.0015(4)
 S1 0.0554(11) 0.1091(17) 0.0562(11) -0.0473(11) -0.0057(9) 0.0215(11)
 N4 0.032(2) 0.027(2) 0.030(2) -0.0056(17) 0.0074(19) -0.0014(17)
 N2 0.030(2) 0.024(2) 0.031(2) 0.0043(16) 0.0128(18) -0.0027(16)
 N1 0.026(2) 0.033(2) 0.030(2) 0.0025(17) 0.0096(18) 0.0005(17)
 O1 0.030(2) 0.032(2) 0.077(3) -0.002(2) 0.016(2) -0.0039(16)
 C10 0.035(3) 0.028(2) 0.032(3) 0.000(2) 0.014(2) -0.004(2)
 C5 0.031(3) 0.026(2) 0.038(3) -0.004(2) 0.014(2) 0.0014(19)
 C6 0.029(2) 0.030(2) 0.034(3) 0.008(2) 0.013(2) 0.0015(19)
 C4 0.033(3) 0.029(2) 0.036(3) 0.001(2) 0.011(2) -0.001(2)
 C12 0.023(2) 0.028(2) 0.029(2) 0.0029(19) 0.0064(19) -0.0050(18)
 C9 0.030(3) 0.036(3) 0.032(3) 0.007(2) 0.006(2) 0.004(2)
 C7 0.028(2) 0.027(2) 0.035(3) 0.008(2) 0.006(2) -0.0010(19)
 C1 0.030(3) 0.043(3) 0.036(3) 0.007(2) 0.007(2) -0.011(2)
 C8 0.027(2) 0.030(2) 0.041(3) 0.001(2) 0.015(2) -0.003(2)
 C17 0.023(2) 0.029(2) 0.050(3) 0.005(2) 0.012(2) -0.001(2)
 C11 0.030(3) 0.031(3) 0.033(3) 0.003(2) 0.007(2) -0.003(2)
 C18 0.027(2) 0.023(2) 0.049(3) 0.004(2) 0.014(2) -0.005(2)
 C16 0.024(2) 0.036(3) 0.039(3) 0.006(2) 0.004(2) -0.002(2)
 C13 0.026(3) 0.037(3) 0.051(3) 0.016(3) 0.007(2) -0.002(2)
 C3 0.032(3) 0.050(3) 0.040(3) 0.019(3) 0.006(2) -0.010(2)
 C2 0.048(4) 0.043(3) 0.049(4) 0.011(3) 0.008(3) -0.014(3)
 C22 0.033(3) 0.036(3) 0.043(3) -0.005(2) 0.018(3) 0.008(2)
 C15 0.035(3) 0.031(3) 0.033(3) 0.0032(19) 0.013(2) -0.004(2)
 C19 0.039(3) 0.042(3) 0.050(3) -0.007(3) 0.013(3) 0.000(2)
 C14 0.038(3) 0.028(3) 0.050(3) 0.010(2) 0.014(3) 0.002(2)
 C20 0.055(4) 0.044(4) 0.065(4) -0.007(3) 0.017(3) -0.003(3)
 C21 0.080(5) 0.045(4) 0.084(6) 0.009(4) 0.031(5) 0.006(4)
 N3 0.032(2) 0.0212(19) 0.035(2) 0.0033(16) 0.0136(18) 0.0011(16)

_geom_special_details
;
 All esds (except the esd in the dihedral angle between two l.s. planes)
 are estimated using the full covariance matrix.  The cell esds are taken
 into account individually in the estimation of esds in distances, angles
 and torsion angles; correlations between esds in cell parameters are only
 used when they are defined by crystal symmetry.  An approximate (isotropic)
 treatment of cell esds is used for estimating esds involving l.s. planes.
;
loop_
  _geom_bond_atom_site_label_1
  _geom_bond_atom_site_label_2
  _geom_bond_distance
  _geom_bond_site_symmetry_2
  _geom_bond_publ_flag
 Co1 N4 2.077(4) . ?
 Co1 N4 2.077(4) 3_343 ?
 Co1 N1 2.151(4) 3_343 ?
 Co1 N1 2.151(4) . ?
 Co1 N3 2.245(4) 4_545 ?
 Co1 N3 2.245(4) 2_353 ?
 S1 C22 1.601(6) . ?
 N4 C22 1.171(7) . ?
 N2 C10 1.335(7) . ?
 N2 C6 1.343(6) . ?
 N1 C5 1.340(7) . ?
 N1 C1 1.345(7) . ?
 O1 C17 1.333(7) . ?
 O1 C19 1.431(7) . ?
 C10 C9 1.367(7) . ?
 C10 C11 1.475(7) . ?
 C5 H5 0.9500 . ?
 C5 C4 1.387(7) . ?
 C6 C4 1.493(7) . ?
 C6 C7 1.392(7) . ?
 C4 C3 1.369(8) . ?
 C12 H12 0.9500 . ?
 C12 C11 1.410(7) . ?
 C12 N3 1.350(6) . ?
 C9 H9 0.9500 . ?
 C9 C8 1.401(7) . ?
 C7 H7 0.9500 . ?
 C7 C8 1.381(7) . ?
 C1 H1 0.9500 . ?
 C1 C2 1.387(8) . ?
 C8 C16 1.478(7) . ?
 C17 C18 1.412(7) 3_444 ?
 C17 C16 1.413(7) . ?
 C11 C13 1.374(7) . ?
 C18 H18 0.9500 . ?
 C18 C16 1.390(8) . ?
 C13 H13 0.9500 . ?
 C13 C14 1.408(7) . ?
 C3 H3 0.9500 . ?
 C3 C2 1.364(8) . ?
 C2 H2 0.9500 . ?
 C15 H15 0.9500 . ?
 C15 C14 1.365(8) . ?
 C15 N3 1.344(7) . ?
 C19 H19A 0.9900 . ?
 C19 H19B 0.9900 . ?
 C19 C20 1.495(9) . ?
 C14 H14 0.9500 . ?
 C20 H20A 0.9900 . ?
 C20 H20B 0.9900 . ?
 C20 C21 1.490(11) . ?
 C21 H21A 0.9601 . ?
 C21 H21B 0.9602 . ?
 C21 H21C 0.9600 . ?

loop_
  _geom_angle_atom_site_label_1
  _geom_angle_atom_site_label_2
  _geom_angle_atom_site_label_3
  _geom_angle
  _geom_angle_site_symmetry_1
  _geom_angle_site_symmetry_3
  _geom_angle_publ_flag
 N4 Co1 N4 180.0 . 3_343 ?
 N4 Co1 N1 90.79(17) 3_343 . ?
 N4 Co1 N1 89.21(17) 3_343 3_343 ?
 N4 Co1 N1 89.21(17) . . ?
 N4 Co1 N1 90.79(17) . 3_343 ?
 N4 Co1 N3 88.85(16) . 4_545 ?
 N4 Co1 N3 91.15(16) . 2_353 ?
 N4 Co1 N3 91.15(16) 3_343 4_545 ?
 N4 Co1 N3 88.85(16) 3_343 2_353 ?
 N1 Co1 N1 180.0 . 3_343 ?
 N1 Co1 N3 87.82(15) 3_343 2_353 ?
 N1 Co1 N3 92.18(15) 3_343 4_545 ?
 N1 Co1 N3 87.82(15) . 4_545 ?
 N1 Co1 N3 92.18(15) . 2_353 ?
 N3 Co1 N3 180.0(2) 4_545 2_353 ?
 C22 N4 Co1 156.6(4) . . ?
 C10 N2 C6 118.0(4) . . ?
 C5 N1 Co1 122.0(3) . . ?
 C5 N1 C1 117.6(5) . . ?
 C1 N1 Co1 120.4(3) . . ?
 C17 O1 C19 118.9(4) . . ?
 N2 C10 C9 123.1(5) . . ?
 N2 C10 C11 114.8(4) . . ?
 C9 C10 C11 122.0(5) . . ?
 N1 C5 H5 118.3 . . ?
 N1 C5 C4 123.3(5) . . ?
 C4 C5 H5 118.3 . . ?
 N2 C6 C4 115.0(4) . . ?
 N2 C6 C7 122.1(5) . . ?
 C7 C6 C4 122.9(4) . . ?
 C5 C4 C6 121.3(5) . . ?
 C3 C4 C5 117.2(5) . . ?
 C3 C4 C6 121.4(5) . . ?
 C11 C12 H12 118.0 . . ?
 N3 C12 H12 118.0 . . ?
 N3 C12 C11 124.1(5) . . ?
 C10 C9 H9 120.1 . . ?
 C10 C9 C8 119.8(5) . . ?
 C8 C9 H9 120.1 . . ?
 C6 C7 H7 120.1 . . ?
 C8 C7 C6 119.8(5) . . ?
 C8 C7 H7 120.1 . . ?
 N1 C1 H1 118.7 . . ?
 N1 C1 C2 122.5(5) . . ?
 C2 C1 H1 118.7 . . ?
 C9 C8 C16 121.9(5) . . ?
 C7 C8 C9 117.1(5) . . ?
 C7 C8 C16 120.9(5) . . ?
 O1 C17 C18 125.1(5) . 3_444 ?
 O1 C17 C16 117.2(5) . . ?
 C18 C17 C16 117.7(5) 3_444 . ?
 C12 C11 C10 120.5(5) . . ?
 C13 C11 C10 123.1(5) . . ?
 C13 C11 C12 116.5(5) . . ?
 C17 C18 H18 118.5 3_444 . ?
 C16 C18 C17 123.1(5) . 3_444 ?
 C16 C18 H18 118.5 . . ?
 C17 C16 C8 120.7(5) . . ?
 C18 C16 C8 120.1(5) . . ?
 C18 C16 C17 119.3(5) . . ?
 C11 C13 H13 119.5 . . ?
 C11 C13 C14 120.9(5) . . ?
 C14 C13 H13 119.5 . . ?
 C4 C3 H3 119.4 . . ?
 C2 C3 C4 121.3(5) . . ?
 C2 C3 H3 119.4 . . ?
 C1 C2 H2 121.1 . . ?
 C3 C2 C1 117.9(6) . . ?
 C3 C2 H2 121.1 . . ?
 N4 C22 S1 178.4(5) . . ?
 C14 C15 H15 117.6 . . ?
 N3 C15 H15 117.6 . . ?
 N3 C15 C14 124.8(5) . . ?
 O1 C19 H19A 109.8 . . ?
 O1 C19 H19B 109.8 . . ?
 O1 C19 C20 109.5(5) . . ?
 H19A C19 H19B 108.2 . . ?
 C20 C19 H19A 109.8 . . ?
 C20 C19 H19B 109.8 . . ?
 C13 C14 H14 121.4 . . ?
 C15 C14 C13 117.2(5) . . ?
 C15 C14 H14 121.4 . . ?
 C19 C20 H20A 109.5 . . ?
 C19 C20 H20B 109.5 . . ?
 H20A C20 H20B 108.1 . . ?
 C21 C20 C19 110.7(6) . . ?
 C21 C20 H20A 109.5 . . ?
 C21 C20 H20B 109.5 . . ?
 C20 C21 H21A 109.1 . . ?
 C20 C21 H21B 109.7 . . ?
 C20 C21 H21C 109.7 . . ?
 H21A C21 H21B 109.4 . . ?
 H21A C21 H21C 109.5 . . ?
 H21B C21 H21C 109.5 . . ?
 C12 N3 Co1 118.3(3) . 2_343 ?
 C15 N3 Co1 125.3(3) . 2_343 ?
 C15 N3 C12 116.4(4) . . ?

loop_
  _geom_torsion_atom_site_label_1
  _geom_torsion_atom_site_label_2
  _geom_torsion_atom_site_label_3
  _geom_torsion_atom_site_label_4
  _geom_torsion
  _geom_torsion_site_symmetry_1
  _geom_torsion_site_symmetry_2
  _geom_torsion_site_symmetry_3
  _geom_torsion_site_symmetry_4
  _geom_torsion_publ_flag
 Co1 N1 C5 C4 177.9(4) . . . . ?
 Co1 N1 C1 C2 -176.1(5) . . . . ?
 N2 C10 C9 C8 -1.7(8) . . . . ?
 N2 C10 C11 C12 -26.1(7) . . . . ?
 N2 C10 C11 C13 152.1(6) . . . . ?
 N2 C6 C4 C5 -166.7(5) . . . . ?
 N2 C6 C4 C3 8.3(8) . . . . ?
 N2 C6 C7 C8 3.7(8) . . . . ?
 N1 C5 C4 C6 176.2(5) . . . . ?
 N1 C5 C4 C3 0.9(8) . . . . ?
 N1 C1 C2 C3 -4.4(11) . . . . ?
 O1 C17 C16 C8 1.1(8) . . . . ?
 O1 C17 C16 C18 -179.6(5) . . . . ?
 O1 C19 C20 C21 -69.6(8) . . . . ?
 C10 N2 C6 C4 176.3(5) . . . . ?
 C10 N2 C6 C7 -3.9(8) . . . . ?
 C10 C9 C8 C7 1.3(8) . . . . ?
 C10 C9 C8 C16 179.3(5) . . . . ?
 C10 C11 C13 C14 -177.7(6) . . . . ?
 C5 N1 C1 C2 2.4(9) . . . . ?
 C5 C4 C3 C2 -3.0(10) . . . . ?
 C6 N2 C10 C9 2.9(8) . . . . ?
 C6 N2 C10 C11 -179.8(5) . . . . ?
 C6 C4 C3 C2 -178.3(6) . . . . ?
 C6 C7 C8 C9 -2.3(8) . . . . ?
 C6 C7 C8 C16 179.8(5) . . . . ?
 C4 C6 C7 C8 -176.5(5) . . . . ?
 C4 C3 C2 C1 4.7(11) . . . . ?
 C12 C11 C13 C14 0.6(9) . . . . ?
 C9 C10 C11 C12 151.2(5) . . . . ?
 C9 C10 C11 C13 -30.6(9) . . . . ?
 C9 C8 C16 C17 48.9(8) . . . . ?
 C9 C8 C16 C18 -130.4(6) . . . . ?
 C7 C6 C4 C5 13.5(8) . . . . ?
 C7 C6 C4 C3 -171.5(6) . . . . ?
 C7 C8 C16 C17 -133.2(6) . . . . ?
 C7 C8 C16 C18 47.4(8) . . . . ?
 C1 N1 C5 C4 -0.6(8) . . . . ?
 C17 O1 C19 C20 -175.2(6) . . . . ?
 C17 C18 C16 C8 179.5(5) 3_444 . . . ?
 C17 C18 C16 C17 0.1(10) 3_444 . . . ?
 C11 C10 C9 C8 -178.8(5) . . . . ?
 C11 C12 N3 Co1 178.3(4) . . . 2_343 ?
 C11 C12 N3 C15 -0.2(8) . . . . ?
 C11 C13 C14 C15 -1.2(9) . . . . ?
 C18 C17 C16 C8 -179.4(5) 3_444 . . . ?
 C18 C17 C16 C18 -0.1(9) 3_444 . . . ?
 C19 O1 C17 C18 -19.7(9) . . . 3_444 ?
 C19 O1 C17 C16 159.7(5) . . . . ?
 C14 C15 N3 Co1 -178.9(4) . . . 2_343 ?
 C14 C15 N3 C12 -0.5(8) . . . . ?
 N3 C12 C11 C10 178.5(5) . . . . ?
 N3 C12 C11 C13 0.2(8) . . . . ?
 N3 C15 C14 C13 1.2(9) . . . . ?

_smtbx_masks_special_details       ?
loop_
  _smtbx_masks_void_nr
  _smtbx_masks_void_average_x
  _smtbx_masks_void_average_y
  _smtbx_masks_void_average_z
  _smtbx_masks_void_volume
  _smtbx_masks_void_count_electrons
  _smtbx_masks_void_content
 1 -0.072 -0.802 0.253 1772.8 512.5 '7 C6H4Cl2'

_smtbx_masks_void_probe_radius     1.2
_smtbx_masks_void_truncation_radius  1.2
_shelx_res_file
;
TITL CAS_081_5_150K in P21/c #14
    cas_081_5_150k.res
    created by SHELXL-2018/3 at 12:23:37 on 19-Oct-2021
REM reset to P21/c #14
CELL 1.54186 14.7191 15.0949 16.6847 90 115.583 90
ZERR 2 0.0002 0.0002 0.0002 0 0.001 0
LATT 1
SYMM -X,0.5+Y,0.5-Z
SFAC C Cl Co H N O S
UNIT 130 14 2 100 16 4 4

L.S. 10
PLAN  5
SIZE 0.08 0.143 0.25
TEMP -123.15
CONF
BOND
MORE -1
ABIN
BOND $H
fmap 2
acta
OMIT 0 0 4
OMIT -1 0 6
OMIT 2 0 0
OMIT 1 4 0
OMIT -2 0 2
OMIT 1 1 4
OMIT -5 1 2
OMIT 1 1 3
REM <olex2.extras>
REM <HklSrc "%./CAS_081_5_150K.hkl">
REM </olex2.extras>

WGHT    0.145000   19.000000
FVAR       0.30532
CO1   3   -1.000000   -0.500000   -1.000000    10.50000    0.03167    0.02072 =
         0.02810   -0.00203    0.01025    0.00149
S1    7   -0.791557   -0.349124   -0.734450    11.00000    0.05538    0.10906 =
         0.05623   -0.04731   -0.00569    0.02145
N4    5   -0.935181   -0.410189   -0.896363    11.00000    0.03198    0.02745 =
         0.02968   -0.00560    0.00740   -0.00143
N2    5   -0.821250   -0.748921   -0.628452    11.00000    0.03049    0.02439 =
         0.03144    0.00427    0.01277   -0.00266
N1    5   -0.995766   -0.598959   -0.905651    11.00000    0.02586    0.03326 =
         0.02963    0.00251    0.00958    0.00055
O1    6   -0.460904   -0.677858   -0.506823    11.00000    0.03015    0.03210 =
         0.07660   -0.00173    0.01582   -0.00388
C10   1   -0.739242   -0.763419   -0.552804    11.00000    0.03531    0.02797 =
         0.03167    0.00006    0.01441   -0.00435
C5    1   -0.917955   -0.605938   -0.825248    11.00000    0.03099    0.02615 =
         0.03761   -0.00385    0.01383    0.00138
AFIX  43
H5    4   -0.862382   -0.567012   -0.810886    11.00000   -1.20000
AFIX   0
C6    1   -0.823308   -0.676051   -0.675343    11.00000    0.02858    0.02992 =
         0.03370    0.00797    0.01272    0.00153
C4    1   -0.914414   -0.667118   -0.761902    11.00000    0.03326    0.02855 =
         0.03563    0.00114    0.01098   -0.00064
C12   1   -0.835359   -0.880966   -0.516091    11.00000    0.02299    0.02789 =
         0.02947    0.00295    0.00640   -0.00503
AFIX  43
H12   4   -0.895144   -0.850484   -0.553647    11.00000   -1.20000
AFIX   0
C9    1   -0.659868   -0.705816   -0.519349    11.00000    0.03047    0.03629 =
         0.03242    0.00704    0.00575    0.00355
AFIX  43
H9    4   -0.603847   -0.718167   -0.464391    11.00000   -1.20000
AFIX   0
C7    1   -0.746061   -0.613673   -0.644876    11.00000    0.02793    0.02662 =
         0.03483    0.00786    0.00649   -0.00102
AFIX  43
H7    4   -0.751544   -0.561095   -0.677952    11.00000   -1.20000
AFIX   0
C1    1   -1.073412   -0.655103   -0.925300    11.00000    0.03046    0.04311 =
         0.03560    0.00720    0.00722   -0.01114
AFIX  43
H1    4   -1.128023   -0.652621   -0.982828    11.00000   -1.20000
AFIX   0
C8    1   -0.661442   -0.628504   -0.566405    11.00000    0.02722    0.02951 =
         0.04058    0.00099    0.01479   -0.00279
C17   1   -0.477086   -0.591503   -0.502273    11.00000    0.02288    0.02873 =
         0.05034    0.00458    0.01233   -0.00070
C11   1   -0.742365   -0.844840   -0.505167    11.00000    0.02992    0.03083 =
         0.03327    0.00329    0.00718   -0.00266
C18   1   -0.598746   -0.474038   -0.529799    11.00000    0.02675    0.02326 =
         0.04935    0.00402    0.01400   -0.00535
AFIX  43
H18   4   -0.666995   -0.456103   -0.550358    11.00000   -1.20000
AFIX   0
C16   1   -0.578181   -0.563565   -0.532686    11.00000    0.02402    0.03634 =
         0.03879    0.00601    0.00384   -0.00155
C13   1   -0.657416   -0.890685   -0.450614    11.00000    0.02645    0.03721 =
         0.05121    0.01625    0.00673   -0.00156
AFIX  43
H13   4   -0.592990   -0.868639   -0.440775    11.00000   -1.20000
AFIX   0
C3    1   -0.994798   -0.723299   -0.784722    11.00000    0.03226    0.04995 =
         0.03974    0.01905    0.00632   -0.00981
AFIX  43
H3    4   -0.993397   -0.767860   -0.743995    11.00000   -1.20000
AFIX   0
C2    1   -1.076844   -0.716516   -0.864798    11.00000    0.04816    0.04342 =
         0.04894    0.01075    0.00791   -0.01357
AFIX  43
H2    4   -1.134511   -0.752696   -0.878703    11.00000   -1.20000
AFIX   0
C22   1   -0.875420   -0.383489   -0.827952    11.00000    0.03286    0.03584 =
         0.04317   -0.00534    0.01768    0.00772
C15   1   -0.758711   -0.997805   -0.424036    11.00000    0.03519    0.03131 =
         0.03297    0.00316    0.01299   -0.00394
AFIX  43
H15   4   -0.763845   -1.050565   -0.395220    11.00000   -1.20000
AFIX   0
C19   1   -0.367311   -0.706002   -0.505208    11.00000    0.03851    0.04184 =
         0.04994   -0.00683    0.01344    0.00007
AFIX  23
H19A  4   -0.311227   -0.690314   -0.447405    11.00000   -1.20000
H19B  4   -0.356182   -0.675562   -0.552775    11.00000   -1.20000
AFIX   0
C14   1   -0.664511   -0.969858   -0.409102    11.00000    0.03753    0.02782 =
         0.04951    0.00969    0.01361    0.00229
AFIX  43
H14   4   -0.606167   -1.002498   -0.372219    11.00000   -1.20000
AFIX   0
C20   1   -0.369484   -0.804014   -0.518746    11.00000    0.05484    0.04429 =
         0.06487   -0.00726    0.01650   -0.00265
AFIX  23
H20A  4   -0.431213   -0.820359   -0.572087    11.00000   -1.20000
H20B  4   -0.310559   -0.822002   -0.528819    11.00000   -1.20000
AFIX   0
C21   1   -0.367565   -0.851680   -0.439817    11.00000    0.08001    0.04529 =
         0.08353    0.00929    0.03096    0.00576
AFIX   3
H21A  4   -0.306995   -0.836360   -0.388527    11.00000   -1.50000
H21B  4   -0.424985   -0.834780   -0.430217    11.00000   -1.50000
H21C  4   -0.369055   -0.914450   -0.449577    11.00000   -1.50000
AFIX   0
N3    5   -0.844715   -0.956183   -0.476495    11.00000    0.03167    0.02122 =
         0.03468    0.00335    0.01360    0.00105
HKLF 4


REM  CAS_081_5_150K in P21/c #14
REM wR2 = 0.3159, GooF = S = 1.052, Restrained GooF = 1.052 for all data
REM R1 = 0.1150 for 5968 Fo > 4sig(Fo) and 0.1178 for all 6247 data
REM 259 parameters refined using 0 restraints

END

WGHT      0.1974     13.7182

REM Highest difference peak  0.574,  deepest hole -0.714,  1-sigma level  0.140
Q1    1  -0.2559 -0.9104 -0.4540  11.00000  0.05    0.51
Q2    1  -0.4649 -0.7614 -0.2678  11.00000  0.05    0.51
Q3    1  -0.3069 -0.9483 -0.4458  11.00000  0.05    0.49
Q4    1  -0.6620 -0.8801 -0.5381  11.00000  0.05    0.49
Q5    1  -0.7898 -0.4396 -0.6906  11.00000  0.05    0.48
;
_shelx_res_checksum                31666
_shelx_hkl_file
;
   3   6   0   26.46    0.97
   4   7   5   85.75    1.65
   6   5  -5   97.72    1.19
   6   7   6    4.58    1.39
   6   8   1    7.53    1.21
   6   8   2   69.69    1.79
   8   7  -4  101.80    1.67
  10   8   1    3.95    1.34
  12   7   2    0.12    0.92
   4   7   1   91.21    1.58
   4   7   4   12.60    1.15
   6   7  -2   37.89    1.19
   7   7  -3    6.04    0.90
   7   8   1    4.39    1.32
   9   7  -4   38.30    1.32
   9   8   0   11.82    1.64
   9   8   2    8.11    1.43
  14   6  -1    1.46    0.89
   4   7   2    5.64    0.96
   4   7   3   63.69    1.46
   5   7   5   23.83    1.30
   8   6  -5   48.20    1.14
   2   5   1   11.95    0.69
   3   6   5   13.37    1.05
   4   6  -1    3.44    0.77
   5   7   0    9.94    1.01
   5   7   4    4.53    1.27
   6   6   7   33.16    1.37
   7   5   8   12.33    1.18
  12   6  -5    4.97    1.16
   2   5   6    6.96    0.72
   3   6   2  575.14    3.07
   4   6   6   46.47    1.44
   5   7   1   29.16    1.24
   5   7   2   24.07    1.37
   5   7   3   71.60    1.76
   6   7  -1   59.20    1.44
   7   6  -4    2.19    0.73
   7   7  -2    1.49    0.93
   8   6   6   22.18    1.59
   9   6  -5    7.03    0.86
  10   6  -5   21.28    1.26
  11   6  -5   16.17    1.32
  11   7  -2    6.90    1.47
   6   7   0   78.99    1.77
   7   5  -5    3.41    0.68
   7   7   4    8.68    1.35
   8   7  -2    3.08    1.08
   9   7   3    2.97    1.33
  10   5   6    0.60    0.95
  10   7   2    7.23    1.31
  11   7   0    2.47    1.31
  12   5   4    2.95    0.85
  13   6  -1    2.05    1.07
  14   5  -4    4.44    1.06
   2   5   3  480.86    2.59
   2   5   4   19.26    0.91
   4   6   0   11.44    0.90
   5   6   6    5.98    1.12
   6   7   1    6.09    1.12
   7   6   6  235.99    2.87
   8   5   7    3.39    1.02
   8   7   3    4.37    1.38
   9   6   5    7.37    1.27
  10   7   0    6.34    1.61
  10   7   1    5.39    1.35
  11   4   6    1.68    0.68
  11   6   3    2.09    1.15
  13   5   2    1.96    0.86
   3   4   8   50.55    1.27
   5   6  -1   44.82    1.31
   7   7   2   11.58    1.37
   8   7  -1   27.19    1.43
   8   7   0    5.28    1.49
   9   6  -4   11.15    1.17
  10   5  -6   15.96    0.93
   2   4   7  147.05    1.54
   4   6   2  266.20    2.36
   4   6   3   59.60    1.47
   5   6   5   40.88    1.42
   7   4   8    5.89    1.23
   7   6  -3   10.62    0.90
   9   3   8    0.58    0.80
  11   5   4    0.19    1.24
  12   5   3    6.65    1.11
  12   6  -1    4.08    1.28
  13   4   3    3.84    0.84
  13   5   1    4.16    1.04
  14   4   1    0.26    0.79
   5   6   0  302.44    2.57
   6   6   5    6.50    1.22
   7   6   5   17.14    1.41
   8   5  -5   61.60    1.19
   8   6  -3   46.28    1.45
  10   3   7    2.48    0.98
  11   6  -3   28.71    1.52
  11   6   1    0.09    1.58
  12   4   4   17.09    1.26
  12   5  -5    1.93    1.21
   4   5  -1  291.97    2.13
   5   6   4  135.85    2.04
   6   6  -1   54.30    1.45
   7   6  -2   62.84    1.53
   8   5   6    4.11    1.25
   8   6   4    7.20    1.39
   9   6  -3    5.88    1.23
  10   6   2    5.74    1.63
  11   4   5    7.09    1.09
  11   6  -1   14.29    1.66
  11   6   0   16.79    1.71
  12   3   5    1.94    0.83
  12   5   2    1.10    1.16
  13   5  -1    3.24    1.35
  14   4   0    0.57    0.89
   3   5   2  302.62    2.28
   3   5   4   11.88    0.99
   5   6   1    7.11    0.99
   5   6   2    3.04    1.00
   5   6   3   17.66    1.16
   6   6   4   11.87    1.27
   7   5   6   28.72    1.77
   8   3   8    6.05    1.14
   9   5  -5   59.48    1.31
   9   5   5   32.81    1.79
  11   5   3    3.85    1.47
  13   5  -2    1.07    1.21
  14   4  -1    1.85    1.21
   1   3   6   59.02    0.95
   3   5   3   98.56    1.45
   5   5  -2  121.87    1.49
   6   5  -3    5.11    0.75
   6   6   0    7.62    1.05
   6   6   3   27.19    1.41
   7   6  -1    8.02    1.28
   7   6   3    4.34    1.54
   8   6  -2   62.97    1.58
   9   6   2    5.10    1.47
  10   5   4   30.61    1.64
  10   6  -1    4.50    1.39
  10   6   0   39.19    1.82
  10   6   1    5.30    1.48
  12   5   1    5.64    1.27
  13   3   3   21.35    1.30
  14   4  -3    0.19    1.03
   2   4   5   10.05    0.71
   4   5   0  187.86    1.83
   4   5   5  240.39    2.36
   6   6   1   11.08    1.13
   6   6   2  151.09    2.19
   7   4  -5    6.40    0.69
   7   4   7   12.25    1.26
   8   5  -4   19.70    1.14
   8   6  -1    8.69    1.23
   9   3   7   23.09    1.45
   9   4  -6    9.90    0.76
   9   4   6   47.36    1.68
   9   6  -1    8.62    1.36
  12   4   3    7.36    1.23
  12   5  -3    2.06    1.37
  12   5   0   -0.36    1.33
  13   4   1    3.18    1.18
  14   3   1    2.12    0.93
   4   5   4   54.71    1.49
   7   6   1    3.61    1.19
   8   6   0   20.62    1.43
   8   6   1    2.00    1.32
   9   5  -4   27.83    1.35
   9   5   4    2.01    1.36
  10   2   7   19.07    1.14
  10   4  -6   74.81    1.41
  10   4   5    1.71    1.14
  10   5  -4   65.72    1.82
  10   5   3   44.26    1.92
  11   2   6    4.23    1.07
  12   2   5    0.67    0.89
  12   3   4    2.08    1.02
  12   5  -2    3.36    1.37
   2   3   7  183.87    1.66
   3   4   6  126.84    1.65
   4   5   1  820.04    3.75
   4   5   3  332.85    2.70
   5   5  -1   44.35    1.15
   6   5  -2  535.07    3.20
   7   5  -3   61.78    1.35
   8   4   6    3.42    1.54
  11   3   5   65.78    1.85
  11   5   1   11.15    1.52
  12   4   2    6.49    1.35
  13   3   2    3.75    1.26
  13   4  -3    0.02    1.46
  13   4  -1   26.53    1.74
   4   5   2   12.77    0.95
   5   3   8    6.02    1.00
   5   4  -3  142.88    1.41
   8   2   8    8.62    1.11
   8   4  -5   75.40    1.37
   8   5  -3  120.76    1.93
   8   5   4   20.30    1.59
   9   4   5    1.28    1.56
  10   5   2   48.64    1.96
  11   4   3    8.19    1.67
  11   5  -2    8.25    1.41
  11   5  -1    7.34    1.48
  11   5   0   -0.09    1.43
  13   4  -2    8.95    1.28
  14   3  -1    1.70    1.12
  15   2  -4    3.20    1.10
   3   4   5   55.09    1.20
   5   5   0   74.11    1.43
   7   4   6   43.34    1.73
   9   5  -3   24.60    1.27
  10   4   4    5.90    1.46
  10   5   1    8.32    1.58
  11   4  -5    0.71    1.20
  12   3   3   10.02    1.33
  13   2   3    3.13    1.00
  14   2   1    0.92    0.99
  14   3  -2    9.58    1.33
   2   3   6    1.91    0.68
   3   3   7  258.82    2.26
   5   4   6  416.61    3.28
   5   5   1   44.07    1.31
   5   5   3   58.69    1.48
   7   2   8   65.39    1.84
   7   3   7   64.84    1.97
   7   5  -2   47.85    1.34
   7   5   3   61.62    2.00
   9   2   7   12.18    1.27
   9   3   6   25.22    1.61
   9   4  -5    4.65    0.84
   9   5  -2    6.45    1.39
  10   1   7   15.45    1.15
  10   3   5   70.20    2.16
  10   4  -5   60.41    1.49
  10   5  -2   40.67    1.71
  10   5   0   31.37    1.82
  11   4   2    7.94    1.81
  12   2   4   31.03    1.63
  12   4   0   30.05    1.82
  13   3   1    3.80    1.28
   3   4   4  218.82    1.97
   7   5  -1   91.49    1.88
   8   4   5    3.85    1.38
   8   5  -2    3.09    1.01
   8   5   2   49.01    1.86
   9   4   4   14.91    1.90
   9   5  -1   51.19    1.94
   9   5   0   10.88    1.71
  10   2   6   39.07    1.60
  12   4  -3   96.04    2.26
  12   4  -2    6.38    1.52
  12   4  -1   10.90    1.53
  13   3   0    2.62    1.54
   3   4   3   15.70    0.85
   5   3   7    8.48    1.26
   6   5   1   52.98    1.49
   7   4   5    6.82    1.39
   7   5   0  110.20    1.98
   7   5   2   22.70    1.44
   8   1   8   18.29    1.46
   8   3   6   22.21    1.82
   8   5  -1  241.16    2.75
   8   5   1   85.26    2.08
  11   4   1   30.70    1.87
  12   3   2   29.48    1.77
  13   2   2   14.56    1.41
  13   3  -1   23.11    1.87
  14   2  -5    2.78    1.07
  14   2  -1    8.44    1.52
  15   1  -2   -0.35    1.17
   4   2   8   10.08    1.07
   6   4   5   25.73    1.42
   8   2   7   26.69    1.51
   8   4  -4   49.75    1.27
   9   3   5    4.74    1.69
   9   4  -4  106.04    1.94
  10   3  -6    9.97    0.90
  10   4   2   27.16    2.10
  11   3   3   12.01    1.66
  11   4   0    8.30    1.91
  13   1   3    1.65    1.08
  13   3  -3   46.90    1.86
  13   3  -2    2.33    1.40
  14   2  -4    6.49    1.43
  14   2  -2   18.85    1.68
  15   1  -3    1.33    1.01
   4   4   4   25.60    1.10
   9   1   7    4.43    1.38
   9   2   6   16.15    1.74
   9   4   3   12.24    1.65
  10   3   4   19.75    1.73
  11   0   6   30.38    1.47
  11   4  -1   17.20    1.70
  12   1   4    1.44    1.36
  12   3   1   11.69    1.69
  13   2   1   42.19    1.86
   4   4   1  163.93    1.75
   4   4   2  179.60    1.94
   5   4  -1 1064.34    4.17
   6   4   4  124.89    2.19
   7   1   8    6.54    1.35
   7   4  -3  105.41    1.60
  10   1   6   10.64    1.50
  10   2   5  135.43    2.56
  10   4  -3    6.74    1.22
  10   4   1    1.59    1.57
  11   2   4   35.22    1.74
  11   3   2   11.78    1.92
  12   3  -4    6.09    1.50
  12   3   0    1.26    1.73
  14   1   0    6.01    1.28
   4   3   6    1.34    0.84
   5   3   6   10.34    1.28
   6   3   6    0.93    1.12
   7   2   7   27.34    1.52
   8   0   8   43.68    1.61
   8   3   5  103.05    2.26
   8   4  -3   10.29    1.00
   8   4   3   19.38    1.58
   9   4  -3    5.34    1.06
  10   3   3   23.48    1.96
  10   4  -2  159.93    2.56
  10   4  -1    6.97    1.48
  12   2   2   64.71    2.28
  12   3  -3    8.93    1.67
  12   3  -2    0.98    1.68
  12   3  -1    0.48    1.45
  13   1   2   20.66    1.51
  13   2  -5    7.46    1.25
  13   2   0   13.65    1.47
  15   0  -2   17.93    1.26
   3   3   5    2.18    0.72
   5   4   0  461.05    2.84
   5   4   3  185.74    2.13
   6   2   7   34.04    1.62
   6   4   3  100.59    1.84
   7   4  -2   10.01    1.11
   7   4   3   99.28    2.02
   8   2   6   41.29    1.90
   8   4   2   44.30    1.87
   9   3  -5  269.98    2.44
   9   4  -2   30.83    1.41
   9   4   1   14.59    1.53
  10  -1   7   14.58    1.26
  10   3  -5    4.29    0.95
  11   3   1   68.12    2.36
  12  -1   5    8.03    1.08
  13   2  -4   36.88    1.79
  13   2  -1    9.26    1.42
  14   1  -5    6.93    1.13
  14   1  -1   28.98    1.63
   5   2   7   30.77    1.34
   5   4   1  159.51    1.85
   5   4   2  313.16    2.56
   6   4  -1   28.37    1.07
   6   4   2   15.88    1.26
   7   3   5   39.73    1.59
   7   4   2   36.40    1.45
   8   1   7    8.56    1.25
   8   4  -2   13.08    1.07
   8   4   1    3.58    1.49
   9   2   5   11.09    1.61
   9   4  -1   49.08    1.66
   9   4   0    1.36    1.28
  11  -1   6    4.79    1.00
  11   2   3    7.24    1.54
  11   3  -4   32.67    1.48
  12   0   4    2.35    1.15
  12   1   3   23.27    1.54
  12   2   1  112.51    2.69
  13   1   1   36.60    1.93
  13   2  -3   42.73    1.86
  14   1  -4    1.75    1.06
  14   1  -3    9.30    1.35
  14   1  -2  129.24    2.47
   3   3   4  325.17    2.20
   5   1   8  107.91    1.85
   6   3   5  284.89    2.82
   6   4   0  247.41    2.31
   7   4  -1   11.28    1.01
   7   4   0  258.20    2.63
   7   4   1   22.89    1.25
   8   4  -1   50.45    1.49
   8   4   0   47.53    1.57
   9   1   6   27.49    1.54
  10   1   5   12.87    1.60
  10   2   4   19.91    1.64
  10   3   2   81.24    2.24
  11   1   4  103.54    2.30
  11   2  -6   21.13    1.08
  11   3   0   86.50    2.29
  13   1  -6    9.84    1.26
  14   0   0   10.07    1.26
  15  -1  -2    0.79    1.13
   7   0   8    2.54    1.22
   7   3  -4   39.41    0.95
   8  -1   8   15.88    1.30
  10  -2   7   17.75    1.20
  10   2  -6  146.83    1.87
  10   3  -4   13.96    1.13
  11   2   2   49.40    2.13
  12  -2   5    2.00    0.92
  13  -1   3    2.36    1.02
  13   0   2   31.12    1.58
  13   1   0  191.76    3.09
  14  -1   1   45.07    1.59
  15  -1  -3    2.90    1.15
   4   3   4   48.66    1.24
   7   3   4  102.14    1.97
   8   3   3  193.60    2.78
   9   2  -6  147.91    1.63
   9   3  -4   40.60    1.24
   9   3   2   17.61    1.76
  10   2   3   23.02    1.87
  10   3  -3   24.86    1.45
  11  -2   6    6.19    0.97
  12  -1   4    1.54    1.25
  12   1   2    4.58    1.44
  13   1  -5   12.94    1.43
  15  -2  -1    5.31    1.00
   6   3   4    7.09    1.01
   8   1   6    2.72    1.46
   9  -1   7    4.07    1.26
   9   2   4  121.79    2.38
  10   3  -2   10.20    1.25
  10   3  -1    7.23    1.35
  11   1   3  126.62    2.71
  11   2  -5    0.57    0.94
  11   2   1   85.68    2.43
  12   2  -3   15.59    1.48
  12   2  -2  106.00    2.32
  13   1  -4   21.67    1.67
  13   1  -2   33.03    1.90
  14  -1   0    6.51    1.38
   4   3   3  139.45    1.58
   5   2   6   72.30    1.49
   6   1   7  121.06    1.97
   7   3   3   63.33    1.63
   9   0   6   62.42    1.99
   9   1   5   39.63    1.83
   9   3  -3   91.42    1.68
   9   3   1   97.15    2.10
  10  -1   6   10.53    1.20
  10   1   4    4.23    1.34
  11  -1   5   20.79    1.43
  11   0   4   18.46    1.41
  12   1   1   52.91    2.03
  13  -1   2   20.95    1.44
  13   1  -3   58.05    1.92
  14  -2   1   -0.37    0.99
  15  -2  -5    0.55    1.00
  15  -2  -2    4.40    1.02
   4   3   1   98.63    1.29
   5   3   3  172.78    1.96
   6   3   3    5.46    0.95
   7  -1   8    6.27    1.26
   7   2   5   54.00    1.63
   9   3  -1  598.61    4.07
   9   3   0   13.04    1.29
  10   2  -5   44.14    1.25
  10   2   2  182.00    2.83
  11   2  -4   30.22    1.39
  11   2   0   82.52    2.19
  13   0   0   54.59    2.08
  14  -1  -1   32.60    1.74
  15  -2  -3   54.58    1.57
   3   2   5  390.63    2.35
   5   0   8  236.61    2.35
   5   1   7  143.50    1.92
   6   2   5   48.56    1.50
   6   3  -2   74.14    1.20
   8   2   4    8.89    1.28
   8   3   1    6.03    1.13
   9   2  -5   87.47    1.47
  11   1  -6   38.00    1.26
  11   2  -3   18.41    1.34
  12  -2   4   32.82    1.44
  12  -1   3   20.83    1.59
  12   0   2  222.14    3.15
  12   1   0   74.51    2.16
  13  -3   3   31.57    1.32
  14  -3   1    2.18    1.12
  14  -2   0    7.64    1.34
  15  -3  -2    6.06    1.11
   5   2   5   16.46    1.08
   5   3   0    2.72    0.66
   5   3   2  112.50    1.52
   6   3  -1  216.33    1.99
   6   3   2  367.17    2.74
   7   3   1   56.84    1.41
   8  -1   7    7.91    1.34
   8   3  -1  261.22    2.52
   8   3   0    1.81    1.00
   9  -2   7   13.03    1.14
  10   1   3   13.92    1.73
  10   2  -4  153.07    2.18
  11  -2   5    3.47    1.10
  12   1  -1   62.80    2.02
  13  -2   2   12.47    1.29
  13  -1   1   41.43    1.74
  14  -1  -5    7.03    1.11
  14  -1  -3   12.80    1.56
  14  -1  -2  131.58    2.40
  15  -3  -3   40.57    1.48
   4   2   5  196.06    1.87
   6   3   0   20.53    0.94
   6   3   1  627.63    3.38
   7   2   4  230.90    2.57
   8   0   6   63.28    1.91
   8   2   3   17.35    1.56
   9  -1   6   23.84    1.59
   9   1   4   16.65    1.44
   9   2   2   49.48    1.73
  10   2   0   39.90    1.68
  11  -1   4   95.92    2.15
  11   1   1   68.02    2.07
  12   1  -3   17.81    1.45
  12   1  -2    4.84    1.34
  13   0  -2    2.04    1.33
  15  -3  -5    1.69    0.90
   2   1   6  366.78    2.02
   6   1   6   62.30    1.51
   7  -2   8   68.10    1.68
   9   2  -4   11.40    1.01
  10  -1   5    9.36    1.30
  10   0   4   17.84    1.52
  10   1  -6   34.49    1.02
  10   2  -3   55.62    1.51
  10   2  -2   22.75    1.32
  10   2  -1   -0.52    1.17
  11   1  -5    5.77    1.16
  12  -1   2    6.77    1.59
  13  -1   0  207.79    3.01
  14  -4   1    0.23    0.74
  14  -4   1    0.09    0.49
  14  -3   0   21.84    1.48
  14  -2  -1    8.40    1.28
   5   1   6   78.14    1.56
   6   2   4   83.24    1.54
   8   2  -4   33.43    1.05
   9  -3   7   21.96    1.18
   9   1  -6   43.85    1.04
   9   2   1   33.94    1.50
  10   1   2  243.54    3.11
  11  -3   5   71.46    1.78
  11   0   2    6.95    1.63
  11   1   0  248.85    3.16
  12  -2   3    6.32    1.21
  12   0   0  359.36    3.80
  13  -3   2    2.72    1.09
  13  -2   1   48.12    1.77
  13  -1  -6   10.05    1.27
  14  -2  -2   20.45    1.38
  15  -4  -5    2.28    0.95
  15  -4  -3   12.30    1.03
   4   1   6   17.76    0.96
   4   2   4  271.41    2.03
   5  -1   8   99.43    1.70
   7  -1   7   50.25    1.73
   7   0   6  342.56    3.20
   7   2   3   18.60    1.14
   8   1   4   56.76    1.66
   8   2   2   14.57    1.19
   9   2  -3   49.90    1.30
  11  -2   4   36.06    1.70
  11  -1   3  135.48    2.63
  11   1  -4  123.40    2.02
  13  -1  -1   81.56    2.13
  14  -3  -1    2.11    1.27
  14  -2  -5    3.19    1.03
  14  -2  -4    7.55    1.28
  14  -2  -3   23.18    1.41
   6   2   3   16.88    0.97
   8   2  -3   22.03    1.05
   8   2   1    5.87    1.20
   9  -2   6   14.40    1.44
   9   2  -2   33.57    1.23
   9   2  -1   76.23    1.67
  10  -2   5  132.78    2.34
  10   1  -5  135.39    1.78
  11  -4   5    8.24    1.06
  11   1  -3   10.55    1.20
  11   1  -2    7.89    1.29
  12  -3   3    8.55    1.37
  12  -1   1   60.37    2.01
  13  -4   2    2.58    1.07
  13  -2   0   11.86    1.59
  13  -1  -5   10.40    1.16
  13  -1  -2   33.70    1.67
  14  -4   0    0.54    1.02
   4   2   3   10.84    0.68
   5   2   3  239.81    2.04
   6   1   5    2.14    0.87
   6   2  -3  539.86    2.50
   7   2  -3  118.45    1.49
   7   2   2   94.88    1.64
   8  -1   6    5.19    1.18
   8   2   0   82.13    1.72
   9  -1   5   41.28    1.58
   9   0   4   22.37    1.48
   9   1   2   12.98    1.49
  10  -4   6   72.10    1.64
  10  -1   4    5.17    1.28
  11   0  -6   85.90    1.58
  12  -2   2   65.84    1.92
  12   0  -2   96.95    2.16
  13  -3   1    3.20    1.22
  13  -1  -3   60.75    1.89
  14  -5   0    1.02    1.02
  14  -3  -2    9.32    1.25
   5   1   5   20.15    1.08
   6   0   6  182.92    2.27
   6   2   2  242.28    2.23
   7   1   4   43.44    1.37
   7   2   1  157.73    1.99
   8   1   3   54.14    1.58
   8   2  -1    2.26    0.85
   9   1  -5    9.84    0.87
  10   1  -4   14.85    1.03
  11  -5   5   13.84    1.03
  11  -3   4    4.54    1.35
  11  -1   2    8.75    1.61
  12  -1   0   82.03    2.31
  13  -5   2    0.81    0.95
  14  -4  -1    1.45    1.01
  14  -3  -5   45.09    1.56
  14  -3  -3   66.95    1.80
   3   1   5  186.70    1.57
   4   2   2  292.99    1.87
   5   2   2  600.27    2.96
   6  -1   7  109.06    1.80
   7  -2   7   26.31    1.45
   7   2   0  307.35    2.49
   9  -5   7    3.30    0.82
   9  -3   6   25.04    1.47
   9   1   1   95.98    2.04
  10  -5   6    0.10    0.83
  10  -3   5   69.85    1.96
  10   1  -3   39.86    1.34
  10   1  -2   45.70    1.46
  10   1  -1   25.17    1.39
  11  -2   3    9.01    1.40
  11   0   0  349.10    3.58
  12  -4   3    8.70    1.20
  13  -3   0    1.46    1.43
   4   2   1  612.94    2.54
   5   2  -1   24.01    0.67
   5   2   1   38.69    1.00
   6   2  -1  211.20    1.81
   6   2   1   61.36    1.21
   7   2  -1   64.62    1.25
   8   0   4  158.44    2.40
  10  -6   6    0.96    0.87
  10   0  -6   36.44    1.11
  12  -3   2   28.40    1.50
  12  -2   1  122.44    2.47
  12  -1  -1   67.88    1.99
  13  -2  -5    8.50    1.36
  13  -2  -3   50.09    1.92
  13  -2  -2  101.56    2.22
  14  -5  -1   16.54    1.19
   5  -1   7  138.22    1.87
   6   2   0   17.87    0.83
   7   1   3   66.72    1.48
   8  -2   6   38.04    1.53
   8   1   2    0.55    0.99
   9  -1   4   19.11    1.41
   9   1  -4   19.92    0.94
   9   1   0    5.55    1.08
  11  -4   4   32.32    1.44
  11  -1   1   67.39    2.01
  11   0  -4  152.26    2.17
  11   0  -2   63.94    1.80
  12  -5   3   10.61    1.10
  12  -1  -2    4.16    1.31
  13  -2  -4   39.89    1.59
  14  -6  -1    2.21    0.97
  14  -4  -5   12.06    1.25
  14  -4  -4   61.67    1.77
  14  -4  -3    1.56    1.06
   8  -4   7    2.96    1.00
   9  -4   6   52.10    1.66
   9   1  -3   85.93    1.52
   9   1  -2   77.95    1.64
   9   1  -1   39.70    1.35
  11  -3   3   11.95    1.39
  11  -2   2   54.53    1.87
  12  -6   3    3.62    1.09
  12  -4   2    7.17    1.45
  12  -2   0   70.79    2.05
  12  -1  -3   17.66    1.34
  14  -5  -2   27.10    1.39
   2   0   6   10.90    0.57
   4   0   6   60.44    1.13
   4   1   4  272.02    1.98
   6  -2   7   35.67    1.42
   6   1   3  124.08    1.74
   7   1   2   11.80    1.10
   8   1   1  296.83    2.70
   9   0  -6   48.08    0.97
  10  -1   2  257.26    3.10
  10   0   0    5.88    1.26
  11  -5   4    1.73    1.05
  11  -1  -6   38.76    1.27
  11  -1   0  266.64    3.20
  12  -7   3   24.20    1.31
  12  -3   1   10.68    1.37
  13  -6   1    4.41    1.07
  13  -3  -6    7.96    1.17
  13  -3  -2    2.49    1.19
  14  -6  -2    1.09    1.08
  14  -5  -3   31.22    1.41
   3   0   6  337.13    2.06
   4  -1   7   23.15    0.86
   6  -1   6   70.81    1.50
   7   0   4   34.79    1.26
   8  -5   7    3.14    1.06
   8  -3   6   18.79    1.41
   8   1   0  246.44    2.39
   9  -3   5    5.94    1.34
  10  -3   4   21.81    1.43
  10   0  -4   12.58    1.16
  12  -2  -1  181.64    2.79
  13  -7   1    4.39    0.99
  13  -5   0   36.76    1.74
  13  -4  -1   37.15    1.80
  13  -3  -5  117.69    2.17
  13  -3  -4   18.87    1.54
  14  -7  -2    6.16    1.05
  14  -5  -5  107.96    1.89
   3  -1   7   18.44    0.77
   5   1   3  237.21    1.99
   7   1   1   17.19    1.10
   8  -1   4   50.19    1.56
   8   1  -2   10.42    0.85
   8   1  -1   43.40    1.19
   9  -5   6    1.90    0.99
   9  -2   4  129.63    2.34
  10   0  -2   44.79    1.45
  11  -6   4   38.65    1.47
  11  -4   3    6.96    1.22
  11  -3   2   14.04    1.74
  11  -2   1   96.82    2.23
  11  -1  -5    6.36    1.05
  12  -5   2    0.40    1.15
  12  -3   0    0.74    1.64
  12  -2  -2  109.96    2.27
  14  -6  -4   12.82    1.20
  14  -6  -3   14.82    1.15
   6   1   2   39.67    1.08
   7   1  -3   31.74    0.92
   8  -6   7    2.94    0.97
   8   0   2  193.04    2.42
  10  -6   5   -0.19    0.95
  11  -7   4    0.55    0.90
  11  -1  -4  128.69    2.03
  11  -1  -3   10.61    1.35
  11  -1  -2    9.39    1.30
  12  -4   1   30.36    1.65
  12  -2  -4  119.43    2.14
  12  -2  -3   16.21    1.33
  13  -6   0   40.93    1.59
  13  -4  -6    8.24    1.17
  13  -4  -2   11.14    1.35
  14  -7  -3   23.22    1.17
  14  -6  -5    4.97    0.91
   5  -2   7   35.66    1.11
   5  -1   6   91.78    1.48
   7  -4   7   12.65    1.13
   7   1   0   42.06    1.13
   9   0   0   87.25    1.75
  10  -3   3   20.99    1.67
  10  -2   2  189.31    2.76
  10  -1  -6   35.83    1.12
  11  -2   0   88.14    2.15
  12  -3  -1    3.42    1.56
  13  -7   0    3.70    1.04
  13  -5  -1    4.35    1.20
  14  -7  -5   12.09    1.05
  14  -7  -4    7.38    0.94
   5   1   2   13.40    0.74
   6  -3   7    5.84    1.00
   8  -4   6    3.49    1.11
   9  -7   6   -0.18    0.90
   9  -4   5   -0.44    1.19
   9  -1   2   15.37    1.31
   9   0  -4  198.61    1.99
  10  -8   5    0.70    0.77
  10  -1   0    9.55    1.28
  11  -3   1   74.53    2.21
  12  -8   2   64.00    1.68
  12  -7   2    0.00    1.05
  12  -5   1    7.33    1.30
  13  -8   0    1.74    0.92
  13  -5  -2    2.05    1.37
  13  -4  -4   28.72    1.42
   4   1   2  140.63    1.29
   6  -2   6  107.54    1.74
   6  -1   5    2.37    0.83
   6   1  -2    5.16    0.61
   6   1   0    2.24    0.64
   7  -1   4   41.66    1.32
   8  -1   3   51.20    1.52
   9  -3   4   13.45    1.34
   9   0  -2    5.78    0.90
  10  -5   4   38.77    1.57
  10  -1  -5  133.85    1.83
  10  -1  -1   27.36    1.56
  11  -6   3    4.61    1.15
  11  -2  -6   21.70    1.02
  12  -3  -2    0.82    1.27
  13  -5  -6   19.78    1.29
   5   0   4  296.43    2.22
   6   1  -1  260.78    1.86
   7  -5   7    2.39    0.96
   7   0   2  477.76    3.11
   8  -5   6    2.85    1.14
   8  -2   4    6.83    1.15
   9  -5   5   32.84    1.50
   9  -1   1  100.16    1.93
  10  -1  -4   16.67    1.16
  10  -1  -2   47.99    1.64
  11  -7   3   44.45    1.71
  11  -2  -5    0.00    1.05
  12  -6   1   16.90    1.47
  12  -3  -5   25.79    1.31
  12  -3  -4    4.63    1.27
  12  -3  -3   10.30    1.26
  13  -8  -1    7.28    1.15
  13  -7  -1    2.16    1.08
  13  -6  -2   80.08    2.06
  13  -5  -5   24.35    1.48
  13  -5  -4   49.14    1.72
  13  -5  -3   35.18    1.58
   8   0   0  118.08    1.74
   9  -1  -6   44.38    0.95
  10  -6   4    9.66    1.22
  10  -4   3    0.55    1.23
  10  -3   2   87.54    2.10
  10  -1  -3   47.00    1.37
  11  -9   3    6.57    1.14
  11  -4   1   37.16    1.90
  11  -3   0   97.64    2.23
  11  -2  -4   33.19    1.36
  11  -2  -3   19.15    1.28
   5  -1   5   22.85    0.96
   8  -1   2    0.13    0.99
   9  -6   5    7.49    1.34
   9  -4   4   13.97    1.34
   9  -2   2   49.80    1.65
   9  -1   0    6.18    1.07
  10  -7   4   15.80    1.36
  10  -2   0   44.81    1.66
  12  -9   1   16.38    1.23
  12  -8   1   -0.45    1.12
  12  -4  -6    2.30    1.13
  12  -4  -2    6.07    1.34
  13  -8  -2    6.23    1.22
  13  -7  -2    4.57    1.13
  13  -6  -6   11.13    1.18
  13  -6  -4   72.66    1.90
  13  -6  -3   12.58    1.31
   3  -2   7   17.77    0.79
   6   0   2  459.81    2.82
   7  -1   3   68.57    1.46
   8  -6   6   21.26    1.20
   8  -4   5    3.71    1.15
   8   0  -2   42.42    1.12
   9  -1  -5    9.89    0.82
  10  -8   4    8.25    1.24
  10  -5   3   51.52    1.77
  11  -6   2   39.93    1.67
  11  -3  -1    8.20    1.40
  12  -6   0    3.33    1.35
  12  -5  -1   36.32    1.69
  12  -4  -5   13.67    1.32
  12  -4  -3  108.10    2.15
  13  -9  -2    8.12    1.00
  13  -7  -3   86.76    2.04
  13  -6  -5   14.36    1.19
   3   0   4  179.63    1.38
   6  -3   6   -0.43    0.87
   6  -2   5   55.27    1.37
   7  -7   7   21.54    1.19
   7  -3   5   40.19    1.50
   7  -2   4  235.96    2.54
   7   0   0  110.70    1.59
   8  -7   6   10.20    1.19
   8  -2   3   19.03    1.24
   9  -1  -1   43.00    1.35
  10  -2  -1    1.87    1.16
  11  -7   2   18.00    1.57
  11  -5   1   10.53    1.51
  11  -4   0   10.63    1.47
  11  -3  -6   20.71    1.16
  12  -4  -4   67.02    1.81
  13  -9  -3    4.83    1.09
  13  -8  -3    6.90    1.09
  13  -7  -6    8.09    0.99
  13  -7  -5    3.98    1.20
  13  -7  -4    8.27    1.13
   4  -1   5   86.99    1.31
   7  -8   7   -0.24    0.89
   8  -1   1  312.21    2.73
   9 -10   5    0.30    0.73
   9  -2   1   34.12    1.45
   9  -1  -4   21.75    0.95
   9  -1  -3   98.48    1.67
   9  -1  -2   82.55    1.55
  10  -6   3   58.86    1.94
  11 -10   2   29.97    1.39
  11  -9   2    4.56    1.30
  11  -3  -5   31.32    1.40
  12  -9   0    1.98    1.26
  12  -6  -1    3.10    1.37
  12  -5  -2    3.11    1.27
  13  -9  -4    5.53    1.04
  13  -8  -6   19.77    1.05
  13  -8  -5   16.15    1.20
  13  -8  -4    1.77    0.96
   4  -3   7  143.31    1.66
   4  -2   6   86.79    1.35
   5  -4   7   94.94    1.69
   7  -5   6   29.96    1.31
   7  -1   2   13.07    0.96
   8  -5   5   75.77    1.83
   9  -4   3   10.90    1.34
  10  -2  -4  178.98    2.14
  10  -2  -3   55.65    1.48
  11  -6   1    0.52    1.29
  11  -4  -1   20.22    1.57
  11  -3  -4   36.38    1.43
  12  -5  -6    6.28    1.00
  12  -5  -3    3.72    1.19
  13  -9  -5   18.96    1.03
   5   0   2  230.78    1.79
   8  -2   2   14.99    1.16
   8  -1  -5   86.15    1.21
   8  -1   0  256.59    2.40
   9  -6   4   23.88    1.39
  10  -7   3    8.18    1.27
  10  -4   1    1.60    1.32
  12  -5  -5    3.79    1.08
  12  -5  -4    1.94    1.19
   3  -1   5  196.57    1.56
   5  -3   6    8.53    0.98
   6  -6   7   32.11    1.23
   6  -4   6   12.56    1.03
   7  -4   5    7.25    1.07
   7  -2   3   20.67    1.09
   8  -6   5   13.60    1.23
   8  -3   3  211.92    2.55
   8  -1  -1   42.60    1.29
   9  -2  -6  166.46    1.69
  10  -9   3    3.00    1.29
  10  -8   3    5.12    1.20
  10  -3  -1    4.10    1.42
  12 -10  -1    1.34    0.93
  12  -9  -1   21.17    1.31
  12  -7  -2   11.31    1.53
  12  -6  -3   16.49    1.58
   6  -3   5  292.49    2.61
   6  -2   4   91.11    1.52
   7  -3   4   99.52    1.78
   7  -1   1   17.46    0.96
   8  -1  -4   86.36    1.33
   9  -7   4   20.29    1.39
   9  -5   3    2.29    1.23
   9  -3   1  101.11    2.00
   9  -2  -1   82.52    1.67
  10  -3  -6   10.13    0.97
  11  -9   1   48.03    1.80
  11  -6   0   18.67    1.65
  11  -5  -1    7.98    1.43
  11  -4  -5    3.75    1.22
  12  -6  -6   17.38    1.16
  12  -6  -5    6.55    1.34
  12  -6  -4   56.64    1.78
   3  -3   7  267.38    1.97
   6  -1   2   38.29    1.15
   6   0  -2  416.24    2.17
   8  -7   5   50.89    1.62
   8  -2   1    5.81    0.98
   8  -1  -3  370.54    2.48
   9 -10   4    1.58    1.09
   9  -9   4   26.94    1.51
   9  -2  -5   95.87    1.46
  10  -5   1    9.83    1.44
  10  -3  -2   10.91    1.18
  12 -10  -2    2.07    1.03
  12  -9  -2    1.90    1.13
  12  -8  -2   78.85    1.96
  12  -7  -3   39.08    1.55
   5   0   0  293.13    1.81
   7  -1   0   43.78    1.20
   8  -3   2   18.07    1.33
   9  -6   3   67.74    2.07
   9  -2  -4    8.07    0.98
  10 -11   2    7.62    1.32
  10  -3  -5    5.02    0.84
  10  -3  -4   16.54    1.21
  10  -3  -3   31.07    1.27
  11 -11   0   14.72    1.33
  11  -7   0    2.64    1.44
  11  -5  -2   10.08    1.36
  12 -10  -3    6.20    1.17
  12  -7  -6    1.64    0.93
  12  -7  -4   15.43    1.29
   4  -2   5  190.74    1.78
   6  -9   7    3.97    0.82
   7 -10   6    0.66    0.87
   7  -9   6    1.23    0.94
   7  -2   2   97.31    1.60
   7  -1  -5  722.50    2.72
   8  -9   5    5.56    0.96
   8  -4   3   21.31    1.31
   8  -2   0   84.29    1.68
   9  -3   0   12.65    1.19
  10  -9   2   28.04    1.73
  10  -6   1    7.60    1.63
  11 -10   0   33.83    1.57
  11  -9   0   21.49    1.69
  11  -5  -3   30.56    1.48
  12 -11  -4    0.30    0.80
  12  -9  -3    6.05    1.15
   5  -4   6  387.70    2.83
   5  -2   4   77.16    1.35
   6  -4   5   24.53    1.30
   6  -2   3   19.13    0.92
   7  -4   4  173.81    2.25
   7  -3   3   67.66    1.49
   8  -6   4    6.89    1.18
   8  -2  -6   16.32    0.69
   9  -4   1   15.48    1.33
  10  -5   0   34.01    1.70
  11  -7  -1   25.54    1.60
  11  -6  -2   64.78    2.05
  12 -10  -6    4.43    0.84
  12 -10  -4    4.36    0.99
  12  -9  -6    2.89    0.86
  12  -9  -5   15.54    1.24
   5  -3   5   30.07    1.03
   6  -3   4    6.49    0.86
   7  -6   5   19.54    1.27
   7  -1  -4  314.24    1.94
   7  -1  -2   73.64    1.16
   9  -8   3    0.94    1.40
   9  -3  -1  696.49    4.14
  10  -7   1    4.81    1.38
  10  -4  -6   92.82    1.57
  11 -11  -1   19.01    1.26
  11  -8  -1    5.53    1.58
   4  -5   7   78.33    1.45
   5  -1   2   12.70    0.69
   7  -2   1  185.55    1.96
   8 -12   4   24.67    1.11
   8  -7   4   13.50    1.24
   8  -4   2   46.80    1.65
   8  -3   1    7.45    1.02
   9 -10   3   -1.24    1.06
   9  -9   3   32.47    1.56
   9  -6   2    6.21    1.31
   9  -3  -6   11.18    0.83
  10  -8   1    5.72    1.68
  10  -4  -5   69.41    1.55
  10  -4  -3    8.02    1.08
  11  -6  -6  107.81    1.96
  11  -6  -3   32.35    1.52
   3  -4   7    1.26    0.56
   6  -7   6    4.97    1.09
   6  -1   0    1.99    0.60
   7 -12   5    0.90    0.76
   7  -7   5   10.06    1.13
   7  -5   4    0.99    1.15
   8 -11   4    1.01    1.07
   9  -4   0    2.52    1.12
   9  -3  -5  307.41    2.38
  10 -10   1    7.76    1.42
  10  -9   1   34.22    1.70
  11 -11  -2   32.93    1.52
  11  -8  -2   23.34    1.71
   3  -2   5  427.99    2.19
   5  -5   6    7.12    0.89
   6  -5   5   37.49    1.28
   6  -2   2  262.26    2.12
   7  -8   5    4.63    1.22
   7  -4   3  100.38    1.75
   8 -10   4    5.12    1.07
   8  -9   4    2.98    1.07
   8  -3   0    0.59    1.07
   8  -2  -4   33.37    0.92
   8  -2  -3   22.00    0.89
   9 -12   2   13.70    1.38
   9  -7   2   16.73    1.47
   9  -3  -4   45.90    1.18
   9  -3  -3  103.26    1.65
  10  -7   0    7.06    1.44
  10  -5  -2   42.44    1.60
  11 -12  -3   -0.13    0.82
  11  -9  -2   11.79    1.27
  11  -7  -3   18.14    1.37
   4  -4   6   55.34    1.13
   4  -2   4  287.50    1.95
   5  -9   7    1.82    0.83
   5  -2   3  257.05    1.96
   6 -10   6    7.10    1.00
   6  -9   6    1.83    0.98
   6  -8   6    2.48    0.91
   6  -4   4  124.44    1.86
   6  -3   3    4.64    0.93
   6  -1  -1  272.83    1.84
   7 -10   5    0.66    0.88
   7  -9   5    4.17    1.01
   7  -2   0  331.11    2.41
   9 -11   2    1.40    1.50
   9  -4  -1   51.33    1.51
  10  -8   0   13.61    1.78
  10  -5  -3  111.87    2.11
  11 -12  -5    1.87    0.81
  11 -12  -4    9.48    0.90
  11 -11  -3    3.42    1.06
  11  -8  -3    2.28    1.21
  11  -7  -6   33.52    1.32
  11  -7  -5   42.88    1.46
  11  -7  -4    6.35    1.23
   4  -3   5  260.81    1.99
   4  -1   2  134.61    1.22
   5  -4   5    0.87    0.75
   5  -3   4    8.89    0.75
   6  -1  -2    6.35    0.56
   8  -7   3    4.61    1.38
   8  -5   2   48.94    1.54
   9 -10   2   92.31    2.21
   9  -5   0   10.78    1.27
  10  -9   0   33.94    1.78
  10  -5  -5  100.77    1.81
  11 -11  -6    1.29    0.90
  11 -10  -3    7.99    1.15
  11  -9  -3    6.64    1.24
  11  -8  -6    3.29    1.15
  11  -8  -5    3.86    1.23
   3  -5   7   90.39    1.34
   5  -6   6    6.09    0.88
   6  -6   5    6.54    0.99
   6  -2   1   61.87    1.22
   7  -3   1   60.66    1.39
   7  -2  -1   71.05    1.22
   8 -12   3   22.11    1.32
   8  -3  -1  274.31    2.42
   9  -7   1  125.78    2.50
   9  -4  -2   34.30    1.27
  10 -12  -1    3.28    1.14
  10  -7  -1   43.50    1.76
  11 -10  -6   58.60    1.52
  11 -10  -5    1.84    1.10
  11 -10  -4   11.02    1.16
  11  -9  -5   13.83    1.27
  11  -9  -4    2.76    1.18
   5  -1   0  282.41    1.71
   7  -7   4    8.55    1.12
   7  -5   3   62.07    1.52
   7  -4   2   31.61    1.18
   7  -2  -5   29.76    0.74
   8 -11   3   19.48    1.30
   8  -9   3  100.83    2.28
   8  -8   3   -0.22    1.15
   8  -3  -6    0.88    0.58
   8  -3  -2    3.03    0.87
   9 -12   1    2.67    1.33
   9  -5  -1   54.51    1.72
   9  -4  -6   11.82    0.75
   9  -4  -3    8.22    0.93
  10 -11  -1    4.50    1.28
  10  -6  -7    3.70    0.78
   2  -3   6    1.76    0.47
   5  -2   2  580.87    2.74
   6  -5   4   89.88    1.59
   7 -12   4    1.13    0.93
   7  -2  -2  527.25    2.73
   8 -13   2   10.72    1.18
   8  -5   1   87.38    1.77
   8  -4   0   48.59    1.36
   9 -13   0   10.12    1.35
   9  -8   1   49.63    1.85
   9  -4  -5    4.07    0.74
   9  -4  -4  117.11    1.68
  10 -13  -3   18.24    1.06
  10 -12  -2   33.87    1.53
  10 -10  -1    0.32    1.26
  10  -7  -2  112.20    2.19
  10  -6  -6    6.71    0.91
   3  -4   6  126.04    1.44
   4  -2   3   10.28    0.65
   5  -5   5   13.14    0.91
   6 -12   5    1.66    0.85
   6  -4   3   97.25    1.51
   6  -3   2  359.74    2.48
   6  -2   0   17.85    0.85
   7  -6   3    5.82    1.19
   7  -3   0    3.13    0.88
   8  -3  -4   51.01    1.06
   8  -3  -3    6.86    0.74
   9  -5  -2    8.61    1.27
  10 -13  -4    1.80    0.75
  10 -11  -2    1.09    1.23
  10  -7  -3   24.92    1.38
   5  -4   4  121.99    1.55
   5  -3   3  169.59    1.65
   8  -4  -1   49.14    1.28
  10 -12  -3   10.75    1.09
  10  -9  -2   14.14    1.44
  -1 -12  11    4.20    0.87
   0 -15   2   30.11    1.52
   0 -15   3   18.20    1.30
   0 -15   5   14.72    1.44
   1 -14   5    7.73    1.68
   1 -11   9  103.12    2.49
   2 -13   2    0.90    1.21
   2 -13   3   11.47    1.43
   2 -13   4    6.74    1.69
   2 -11  -2    2.61    0.83
   2  -9   8   46.34    1.93
   3 -11   0   13.05    1.18
   3  -9  -2   18.31    1.06
   3  -6   6   38.13    1.25
   3  -4   5   44.61    1.06
   3  -3   3  101.50    1.10
   4  -7   1   91.19    1.58
   4  -7   2    4.87    1.01
  -2 -16   2    5.86    0.84
   0 -13   9    7.11    1.30
   0 -12  10   24.10    1.50
   1  -9  10    1.80    1.25
   2 -10  -3   28.74    1.09
   3  -5   6   45.52    1.25
   4  -9   1   11.32    1.28
   4  -9   2   67.51    1.87
   4  -8   0  134.88    1.90
   4  -8   1  149.07    1.96
   4  -8   3    1.77    1.21
   4  -6   1    4.85    0.75
   4  -6   2  277.00    2.32
  -1 -16   3   20.11    1.10
  -1 -16   5    1.59    0.92
   0 -15   1    1.82    0.98
   0 -15   6    2.79    1.13
   1 -14   0    4.55    1.08
   2 -13   0   59.35    1.73
   3 -12   1   62.32    1.86
   3 -12   3   62.44    2.03
   3 -11  -1  238.65    2.63
   3 -10  -2  183.75    2.14
   4  -9   0   61.93    1.51
   4  -6   3   65.30    1.36
   4  -5   1  732.85    3.31
   4  -5   2   12.50    0.91
  -1 -16   2    6.48    0.99
   0 -11  11    7.34    1.04
   1 -13  -2   -0.10    1.04
   1 -10  10   23.83    1.35
   2  -8   9   41.92    1.73
   3 -12   4   14.02    1.64
   3  -8  -3    4.09    0.76
   3  -6   7   76.30    1.76
   4 -10   1    2.94    1.17
   4  -8  -1   56.14    1.29
   4  -8   4  101.61    2.01
   4  -6  -1    3.67    0.76
   4  -6   4  135.94    1.97
   4  -5   3  348.25    2.58
   0 -15   7   51.39    1.67
   1 -15   2    1.50    1.08
   1 -15   3    8.72    1.23
   1 -15   4    2.14    1.20
   1 -14  -1    0.07    1.09
   2 -14   1   17.14    1.59
   2 -14   2    4.60    1.27
   2 -13  -1   35.60    1.43
   2 -11  -3   16.73    0.96
   2  -9   9  303.12    3.45
   3 -11   6    0.27    1.66
   3  -9  -3  117.03    1.60
   3  -4   6  145.27    1.67
   3  -3   5    3.22    0.63
   4 -10   0   37.07    1.46
   4  -9  -1  271.33    2.59
   0 -16   3    0.36    1.04
   0 -16   4    7.41    1.05
   0 -14   9   14.10    1.23
   1 -15   1   23.34    1.31
   1 -15   5    1.98    1.17
   1 -11  10   -0.24    1.15
   2 -14   5   11.40    1.81
   2 -10   9   16.52    1.71
   2  -9  -4   39.93    0.94
   3 -13   1  146.06    2.55
   3 -13   2    2.88    1.31
   3 -13   3   55.39    2.00
   4 -10  -1   17.46    1.20
   4  -8  -2  129.10    1.72
   4  -8   5   47.10    1.72
   4  -5   4   63.14    1.34
   4  -4   2  150.20    1.57
   0 -16   2   16.09    1.11
   0 -16   5    1.24    0.88
   2 -14   0    4.47    1.19
   3 -13   0    4.48    1.20
   3 -13   4    1.09    1.51
   4 -10   5   29.03    2.10
   4  -9  -2   40.89    1.25
   4  -4   3   24.52    0.88
   1 -14   8   22.73    1.49
   1 -13   9   22.03    1.44
   2 -14   6   40.18    2.00
   2 -13  -2    2.85    1.04
   4 -12   1    2.71    1.38
   4 -12   2  131.63    2.63
   4 -11  -1   51.64    1.68
   4 -10  -2   91.99    1.87
   5  -8   1   46.16    1.67
   2 -15   2   22.16    1.42
   2 -15   4    3.45    1.38
   2 -14  -1  132.29    2.20
   3 -14   2  116.14    2.55
   3 -14   3    0.51    1.52
   3 -13  -1   61.64    1.78
   3 -11  -3  111.64    1.85
   3  -8  -4   25.52    0.95
   4 -12   0  253.28    3.20
   4  -6   6   47.19    1.60
   5  -9   0   -0.30    1.37
   5  -9   1   51.66    1.70
   5  -8   0  122.96    1.99
   5  -7   2   28.66    1.29
   1 -16   2   29.39    1.41
   1 -16   3   21.31    1.31
   2 -15   1   52.45    1.71
   2 -15   5   50.91    1.98
   2 -13   8    2.07    1.45
   3 -14   1    9.58    1.29
   3 -14   4   61.33    2.28
   3 -13   6    1.21    2.10
   3  -9  -4    8.07    0.87
   4 -12  -1   16.60    1.56
   4  -9  -3  214.82    2.30
   4  -8  -3   75.08    1.40
   5  -9  -1   46.21    1.65
   5  -9   3   17.07    1.62
   5  -8  -1   76.66    1.63
   5  -7   3   75.74    1.78
   5  -6   0  294.28    2.53
   5  -6   2    4.07    0.91
   2 -15   0   14.19    1.39
   2 -14   7    6.23    1.39
   3 -14   0   49.81    1.80
   3 -13  -2  100.17    2.24
   3 -10  -4   17.98    1.10
   3  -6  -4   32.12    0.81
   4 -13   1  187.16    3.00
   4 -13   2    8.74    1.51
   4 -13   3   63.51    2.37
   4 -12   5    6.22    2.08
   4 -10  -3   65.02    1.70
   4  -5   6    4.53    1.05
   4  -3   1   92.30    1.14
   4  -3   3  134.93    1.54
   5  -8   4    5.87    1.37
   5  -6   3   19.36    1.16
   2 -15   6    0.34    1.30
   2 -14  -2    5.68    1.08
   3 -14  -1   11.45    1.42
   4 -13   0   16.70    1.47
   4 -12  -2  480.38    4.15
   5 -11   0    1.17    1.44
   5 -11   2   14.50    1.69
   5 -11   3   10.73    1.92
   5  -8  -2   72.23    1.56
   5  -6  -1   45.12    1.20
   5  -5   0   72.70    1.35
   5  -5   1   38.27    1.14
   2 -15  -1   23.26    1.39
   3 -15   2   22.21    1.60
   3 -11  -4   22.89    1.27
   3  -9   9   77.50    2.14
   4 -13  -1   71.82    2.19
   4  -3   4   53.96    1.17
   5 -10  -2  158.67    2.57
   5  -9   5   87.89    2.59
   5  -5   3   63.71    1.46
   2 -16   2   15.62    1.22
   2 -16   3   -0.08    1.03
   3 -15   1    3.86    1.18
   3 -15   4    4.55    1.47
   3 -14   6  107.56    2.69
   4 -14   2   47.90    1.90
   4  -9  -4  120.91    1.87
   4  -8  -4   14.00    0.99
   5 -12   0   28.82    1.74
   5 -12   3    4.14    1.99
   5 -11   4    8.36    1.75
   5 -10   5   17.65    2.17
   5  -5  -1   40.86    1.09
   2 -16   1   -0.99    0.98
   3 -14  -2    4.88    1.35
   3 -13  -3   50.35    1.62
   4 -14   0   24.76    1.63
   4 -14   3    4.51    1.43
   4 -13  -2   12.43    1.55
   4 -12  -3  187.82    2.73
   5 -12  -1   11.33    1.47
   5  -9  -3  114.35    1.96
   5  -8  -3   21.33    1.12
   5  -4   1  134.76    1.69
   5  -4   2  304.37    2.51
   6  -9   0   11.80    1.66
   6  -9   1   25.73    1.91
   6  -8   1    7.99    1.36
   3 -15   5   25.55    1.60
   3 -11   9   11.80    1.26
   4 -14   4   26.12    1.80
   4  -9   8   44.74    2.13
   4  -3   5  263.58    2.27
   5 -13   2    6.67    1.83
   5 -12   4    3.54    1.76
   5  -7  -3  155.40    1.95
   5  -5  -2  118.86    1.57
   5  -4   3  202.17    2.18
   6 -10   2  101.47    2.76
   6  -7   0   88.63    1.88
   6  -7   1    5.79    1.22
   6  -7   2    5.44    1.27
   3 -15  -1   13.05    1.24
   3 -14   7    3.08    1.38
   3 -13   8    3.55    1.34
   4 -14   5   11.14    1.90
   5 -13   3    5.07    1.66
   5 -12  -2   59.49    1.97
   5  -5   5   12.82    1.32
   6 -11   1    4.00    1.87
   6  -7   3   63.67    2.10
   6  -6   2  161.47    2.53
   3 -16   2    7.86    1.24
   3 -12   9    0.52    1.22
   4 -15   2    1.00    1.17
   4 -15   3   13.68    1.56
   4 -11   8   26.61    1.93
   4  -2   3   10.37    0.63
   5  -4   4  141.40    1.96
   6 -11  -1    2.59    1.80
   6 -11   0    2.85    1.53
   6  -9  -2    0.95    1.22
   6  -9   4   52.27    2.42
   6  -8  -2   17.12    1.30
   6  -6  -1   53.60    1.46
   3 -16   1    1.21    1.01
   4 -14  -2   21.09    1.48
   4 -12  -4  152.82    2.47
   5 -14   1    3.51    1.54
   5 -14   2    2.65    1.53
   5 -10  -4   99.26    2.07
   5  -9  -4    0.66    0.97
   5  -8  -4  134.36    1.96
   5  -3   1    5.06    0.86
   5  -3   2  120.08    1.69
   6 -12   0    5.87    1.82
   6 -10   4  129.72    3.03
   6  -7  -2   40.96    1.42
   6  -5   0   74.54    1.70
   6  -5   1   52.81    1.46
   4 -15   4    3.86    1.25
   4  -9  -5  244.90    2.43
   4  -8  -5    9.10    0.83
   5 -14   0   29.87    1.68
   5 -14   3   27.88    1.82
   5 -13  -2   -1.33    1.37
   5 -12  -3    0.57    1.21
   5 -10   7   87.08    2.86
   6 -12  -1    0.95    1.78
   6 -12   3   15.45    2.14
   6  -9  -3   52.87    1.72
   6  -6  -2   52.58    1.44
   6  -6   4   13.69    1.60
   6  -5   2   38.43    1.43
   4 -15  -1   15.74    1.33
   4 -12   8   23.81    1.64
   4 -10  -5    0.50    0.86
   4  -7  -5   13.06    0.88
   5 -14  -1    4.53    1.40
   5 -14   4   10.78    1.81
   5  -3   3  179.31    2.00
   6 -13   1   39.94    2.19
   6 -10  -3    8.77    1.36
   6  -7  -3    6.43    1.03
   6  -5   3    9.97    1.20
   4 -14  -3    3.05    1.36
   5 -13  -3   16.78    1.74
   6 -13   0   21.31    1.76
   6 -12  -2    5.29    1.52
   6 -12   4    8.83    1.83
   6 -11  -3   95.46    2.35
   6  -5  -2  560.97    3.65
   7  -9   2    4.71    2.03
   7  -8  -1    2.84    1.42
   7  -8   0   34.71    1.83
   7  -7   1   16.68    1.81
   4 -15  -2   -0.39    1.25
   5 -15   1   17.44    1.48
   5 -14  -2    8.94    1.33
   5 -14   5    8.92    1.83
   5 -12  -4    8.82    1.46
   6 -13  -1    8.75    1.58
   6 -13   3   14.48    1.84
   6  -9  -4   15.52    1.57
   6  -8  -4   81.13    1.96
   6  -6   5    8.10    1.77
   6  -4   0  240.53    2.45
   6  -4   2   16.51    1.13
   7 -11   1    5.65    2.09
   7 -10  -1    0.31    1.58
   7  -9  -2   88.91    2.51
   7  -8  -2    3.52    1.60
   7  -7  -1   67.51    1.96
   5 -15   3    2.24    1.17
   5 -10  -5   27.76    1.52
   5  -8  -5   57.74    1.43
   5  -5  -4   33.02    1.11
   5  -4  -3  130.59    1.59
   6 -13  -2   -0.27    1.70
   6 -13   4   52.29    2.56
   6 -12  -3   27.08    1.75
   6 -10  -4  345.78    3.67
   6  -8   6    3.78    1.96
   6  -7  -4   20.80    1.37
   6  -4   3  107.20    2.06
   7 -11  -1    4.81    1.66
   7 -10  -2   23.39    1.85
   7  -9   3   86.61    2.66
   7  -8   3   60.12    2.31
   7  -7  -2    0.37    1.44
   7  -6   1    2.96    1.29
   6 -14   0    3.56    1.43
   6 -14   2    6.16    1.48
   6 -11  -4    1.82    1.33
   7 -12  -1   47.42    2.38
   7 -12   1    5.60    1.65
   7 -11  -2   44.00    2.07
   7 -11   3   64.41    2.60
   7  -9  -3   75.92    2.34
   7  -8  -3   75.77    2.19
   7  -6  -1    8.27    1.26
   7  -6   2  200.21    3.00
   5 -14  -3    0.52    1.15
   5 -13  -4   18.66    1.48
   5  -3   5   32.14    1.14
   5  -2   1   32.14    0.96
   5  -2   2  620.82    3.35
   6 -14   3    8.09    1.51
   6 -13  -3   14.46    1.71
   6  -6  -4   22.79    1.15
   6  -4   4  135.19    2.36
   7 -10   4   27.22    2.22
   7  -7  -3    9.86    1.49
   7  -6  -2   79.29    1.90
   7  -5   0  107.16    2.12
   5 -15  -2    2.81    1.28
   6  -9  -5  110.58    2.30
   6  -3   0   19.92    1.19
   6  -3   1  573.31    3.70
   6  -3   2  382.45    3.23
   7 -13   0    9.93    1.64
   7 -13   1    3.41    1.59
   7 -12  -2   17.24    1.79
   7 -12   3   56.77    2.42
   7 -11   4  165.55    3.53
   7  -5  -1   92.57    1.96
   6 -15   1    8.61    1.38
   6 -10  -5   11.82    1.37
   6  -9   7    5.04    1.77
   6  -8  -5   26.70    1.35
   7 -13  -1    7.87    1.59
   7 -13   2   14.13    1.72
   7 -12  -3    2.29    1.81
   7  -9   5    5.71    2.10
   7  -8  -4   44.63    1.75
   7  -6  -3   12.48    1.26
   7  -5  -2   44.85    1.68
   7  -5   3   66.79    2.20
   8 -10   0  120.32    3.04
   8 -10   1   47.15    2.72
   8  -9   1   11.65    1.96
   8  -8   1    0.89    1.75
   5  -9  -6   42.94    1.54
   5  -2  -1   24.51    0.86
   6 -11  -5    6.64    1.35
   6  -7  -5   52.46    1.54
   6  -3  -1  193.69    2.18
   6  -3   3    4.75    1.01
   7 -13  -2   34.00    1.95
   7 -13   3   10.39    1.82
   7 -10   5    0.59    1.77
   7  -7  -4    3.87    1.18
   7  -4   0  256.24    3.00
   7  -4   1   22.38    1.57
   8 -11  -1   16.31    2.20
   8 -11   0   56.95    2.52
   8  -8   2   36.25    2.23
   8  -7  -1   32.53    1.94
   5  -8  -6   23.19    1.12
   6 -14  -3    2.73    1.29
   7  -4   2   38.13    1.85
   8 -11   2   33.91    2.49
   8  -6   0   22.47    2.01
   6 -15  -2    0.43    1.26
   6 -12  -5   50.63    1.88
   6  -3  -2   75.70    1.52
   6  -3   4    7.25    1.27
   7 -14  -1   14.72    1.59
   7 -13  -3    5.62    1.59
   7 -13   4    9.07    2.01
   7 -12  -4   13.70    1.60
   7 -12   5    0.94    2.08
   7  -9  -5  112.70    2.65
   7  -6  -4    2.65    1.12
   7  -5  -3   62.94    1.71
   7  -5   4   -1.17    1.31
   8 -12  -1    7.24    1.75
   8 -12   0    8.14    1.81
   8 -12   1   10.99    1.86
   8 -10  -3   98.55    2.73
   8  -9   3  121.08    3.16
   8  -8  -3   63.28    2.26
   8  -8   3   -0.20    1.84
   6  -9  -6   44.55    1.78
   7  -8   6   38.26    2.35
   7  -4  -2    9.96    1.19
   8 -12  -2   15.37    1.84
   8 -12   2   47.80    2.37
   8 -11  -3   47.81    2.20
   8 -11   3   22.85    2.10
   8  -7  -3  135.90    2.75
   8  -6  -2   73.55    2.17
   8  -6   2   38.82    2.08
   6 -10  -6   70.30    1.92
   6  -8  -6   14.73    1.23
   6  -2   1   60.58    1.47
   6  -2   2  263.70    2.75
   7 -13  -4   17.34    1.81
   7 -11  -5   31.47    1.84
   7 -11   6   21.93    2.20
   7  -7  -5   72.25    1.93
   7  -7   6    8.64    1.96
   8 -13   1   37.13    2.04
   8 -12   3   23.25    2.27
   8 -10  -4   18.17    1.81
   8 -10   4    6.47    2.22
   8  -8  -4    2.28    1.51
   8  -5  -1  243.48    3.30
   8  -5   1   79.05    2.32
   6 -15  -3    2.14    1.13
   6  -7  -6    8.81    1.21
   6  -5  -5  110.62    1.86
   7 -14  -3    0.24    1.34
   7 -12  -5    3.29    1.69
   7  -4  -3  103.48    1.99
   7  -3   1   54.95    1.69
   8 -13  -2    5.29    1.53
   8 -13   2    9.78    1.67
   8 -11  -4   38.88    2.10
   8 -11   4    0.97    2.12
   8  -7  -4  108.17    2.50
   9 -10  -1   64.86    2.66
   9 -10   0   38.66    2.50
   9  -9  -2   45.49    2.69
   9  -9  -1  219.82    3.94
   9  -8   0   12.15    2.10
   5  -1   0  282.44    2.28
   5  -1   3  228.63    2.26
   6  -2  -1  210.33    2.30
   7  -6  -5   61.14    1.76
   7  -3  -1    7.90    1.17
   8 -13  -3   82.60    2.64
   8 -12  -4   18.02    2.04
   9 -11  -1   36.66    2.34
   9 -11   0    6.92    1.96
   9 -10  -2   48.71    2.57
   9 -10   1    5.91    2.00
   9  -9  -3   49.45    2.70
   9  -8  -2    5.57    1.93
   9  -8   1   51.66    2.56
   9  -7   0    4.68    2.01
   4  -5  -6   76.97    1.31
   7  -8  -6  125.78    2.46
   7  -3   3   66.41    2.05
   8 -10  -5   20.39    1.87
   8  -9   5    5.93    2.19
   8  -6  -4   37.61    1.81
   8  -5  -3  141.69    2.60
   8  -4  -1   55.94    1.94
   8  -4   1    3.65    1.67
   9 -11   1   59.45    2.57
   9 -10  -3    6.44    1.86
   9 -10   2   92.35    3.03
   9  -8   2   13.21    2.04
   9  -7   1  121.77    3.32
   6  -2  -2  667.38    3.88
   7 -14  -4    3.99    1.28
   7 -13  -5   34.63    2.00
   7  -7  -6   19.74    1.66
   7  -5  -5    4.67    1.38
   8 -11  -5   13.52    1.71
   8 -11   5    3.36    1.99
   8  -7  -5    4.99    1.45
   9 -12   1    2.17    1.91
   9 -11  -3   37.35    2.29
   9 -11   2    3.15    1.87
   9  -9  -4  147.09    3.56
   9  -7  -3  195.52    3.59
   9  -7   2   16.68    2.20
   9  -6  -2  144.92    3.13
   8 -13  -4    0.36    1.46
   8 -12  -5    2.07    1.75
   9 -12  -3   19.37    2.10
   9 -11  -4   29.77    2.32
   9  -8   3    1.69    2.00
   9  -6  -3    6.54    2.15
   6  -8  -7   64.25    1.88
   7  -6  -6  283.42    3.34
   7  -2   0  308.69    3.20
   7  -2   1  192.53    2.79
   8 -10  -6   21.62    2.09
   8  -6  -5   46.76    1.87
   8  -4  -3    9.00    1.40
   8  -4   3   20.73    1.99
   9 -13  -1    3.11    1.44
   9 -12   2   10.18    1.71
   9 -11   3   17.87    2.03
   9  -7   3    4.27    1.92
   9  -6   2    5.23    1.99
   9  -5  -2    5.98    2.00
   9  -5  -1   54.13    2.33
   6  -2  -3  508.24    3.45
   6  -1   0    1.93    1.00
   7  -2  -1   66.83    1.74
   7  -2   2   96.44    2.25
   8 -11  -6    2.14    1.78
   8  -8  -6   63.00    2.22
   8  -3  -1  266.91    3.35
   8  -3   0    0.16    1.32
   8  -3   1    9.17    1.83
   9 -12  -4   78.42    2.75
   9 -10  -5   95.18    2.83
   9  -9   4   32.02    2.54
   9  -5   1   51.42    2.43
  10 -10  -2    9.17    2.38
  10 -10  -1    0.98    1.98
  10  -9  -1   43.29    2.65
  10  -9   0   28.49    2.44
  10  -8  -2   65.38    3.07
  10  -8   0   12.43    2.59
   7  -9  -7    1.62    1.54
   7  -8  -7  117.01    2.51
   7  -2  -2  495.56    3.92
   8  -7  -6    3.54    1.48
   8  -5  -5   64.12    1.99
   8  -4  -4   51.99    2.01
   8  -3  -2    4.40    1.33
   9 -11  -5   73.94    2.62
   9 -10   4    2.96    1.82
   9  -8   4   10.59    2.04
   9  -6   3   70.88    2.68
   9  -5  -3   30.46    2.01
  10 -11  -1    4.78    1.84
  10 -11   0    9.32    2.12
  10 -10  -3   18.14    2.21
  10 -10   1    8.50    2.31
  10  -9   1   29.12    2.41
  10  -8  -3   12.03    2.15
  10  -8   1    6.68    2.44
  10  -7  -2  104.06    3.20
  10  -7  -1   44.98    2.61
  10  -7   0    6.39    2.53
   6  -1  -1  255.85    2.55
   6  -1   3  127.39    2.05
   7  -5  -6  214.93    2.90
   7  -3  -4   40.08    1.50
   8  -4   4  248.73    3.76
   8  -3   2   19.42    1.66
   9  -4  -2   31.11    2.24
   9  -4  -1   49.07    2.21
   9  -4   0    1.37    1.65
  10 -12  -1    3.41    1.86
  10 -11  -3   12.59    1.91
  10 -11   1   74.39    2.86
   6  -6  -7    7.50    1.22
   7  -7  -7   10.31    1.31
   8  -3  -3    6.36    1.37
   9 -12  -5   13.46    1.73
   9  -9  -6   28.52    2.11
   9  -6  -5    9.89    1.73
   9  -5  -4   30.89    1.98
  10 -12   0   34.95    2.02
  10 -11  -4    0.35    1.98
  10 -10   2   48.50    2.54
  10  -8  -4  127.98    3.37
  10  -8   2    2.32    2.10
  10  -7  -4   15.81    2.51
  10  -6  -1    2.06    2.08
  10  -6   0   48.62    2.66
   7  -2  -3  126.21    2.18
   9  -7  -6   38.18    2.42
  10 -12  -3   10.91    1.72
  10 -11   2    8.68    2.05
  10  -6   1    8.60    2.20
   8  -7  -7  199.64    3.33
   8  -5  -6   15.70    1.50
   8  -4  -5   77.16    2.09
   8  -3  -4   52.66    2.06
   8  -2   0   74.60    2.12
   9  -5  -5   67.13    2.33
  10 -13  -2    3.72    1.36
  10 -12  -4   43.53    2.22
  10 -10  -5   -0.26    1.80
  10  -9   3    2.93    2.16
  10  -8  -5   65.36    2.74
   5  -5  -7   30.56    1.20
   7  -1  -1  111.47    2.27
   7  -1   0   44.25    1.58
   9  -6  -6   67.44    2.38
   9  -5   4    2.19    2.01
   9  -4  -4  108.64    2.67
   9  -3  -1  643.83    5.63
   9  -3   0   14.00    1.77
  10 -13  -3   16.02    1.66
  10 -11  -5   42.10    2.32
  10  -7  -5   15.95    2.16
  10  -6   2    5.78    2.14
  10  -5  -3  100.93    3.04
  10  -5   1    8.56    2.47
  11  -9  -1   12.98    2.14
  11  -8  -2   23.44    2.50
   7  -1   2   15.50    1.43
   8  -2   2   11.90    1.48
   9 -10  -7   25.07    2.20
   9  -9  -7    2.61    1.72
   9  -3  -3   99.60    2.76
   9  -3   1  110.36    2.85
  10 -13  -4    1.15    1.46
  10 -12  -5    1.63    1.78
  10 -10  -6   42.12    2.59
  10  -9  -6  105.85    3.17
  10  -5  -4   75.96    2.80
  11 -11  -1   16.24    2.07
  11 -10   0   30.00    2.22
  11  -9   0   21.14    2.22
  11  -8   0   23.27    2.36
  11  -7  -3   13.10    2.65
  11  -7  -2    4.33    2.23
   7  -1  -2   75.45    1.83
   8  -4  -6   36.07    1.90
   9  -7  -7  131.01    3.25
   9  -5  -6   74.55    2.63
   9  -4  -5    5.42    1.61
  10 -11  -6    4.53    1.84
  10  -4  -2  156.46    3.52
  10  -4  -1    8.10    2.04
  11 -11  -3    1.81    1.69
  11 -10   1   18.04    2.22
  11  -8  -4    8.87    2.32
  11  -8   1   21.53    2.56
  11  -7   0    3.06    1.99
  11  -6  -2   60.83    3.23
   7  -7  -8  137.58    2.57
   9 -11  -7    8.21    1.61
   9  -3  -4   45.98    2.32
  10  -9   4   10.38    1.88
  10  -5  -5   91.37    3.11
  10  -4  -3    6.50    1.95
  11 -12  -3    0.11    1.46
  11 -12  -2    8.16    1.51
  11 -11  -4   19.10    1.96
  11 -10  -5    0.76    2.02
  11  -9  -5   13.06    2.07
  11  -7   1    4.66    2.49
  11  -6  -3   33.89    2.62
  11  -6   0   15.49    2.64
   7  -1  -3   30.67    1.60
   8  -5  -7  271.39    3.50
   8  -2  -4   30.58    1.84
   9  -2  -1   80.23    2.60
  10  -9  -7   96.79    3.16
  11 -12  -4    8.78    1.78
  11 -11  -5    3.37    1.93
  11  -6  -4  123.04    3.52
  11  -5  -2    9.64    2.65
   5  -4  -7  245.61    2.44
   7  -3  -6   59.18    1.73
   8  -7  -8   28.51    1.91
   8  -1  -1   42.28    1.80
   8  -1   1  315.32    3.81
   9  -4  -6   11.01    1.88
   9  -2  -2   36.14    1.98
   9  -2   1   34.31    2.30
  10  -8  -7   30.54    2.26
  10  -3  -2    9.74    2.28
  10  -3  -1    5.62    1.92
  11  -8   2    4.99    1.91
  11  -6   1    0.64    1.99
  11  -5  -3   33.42    2.59
  11  -5  -1    7.64    2.24
  11  -5   0   -0.39    2.50
   6  -1  -4   22.34    1.13
   7  -6  -8  144.44    2.46
   7  -4  -7  117.60    2.23
   8  -1  -2    9.90    1.44
   9  -9  -8   26.64    2.14
   9  -8  -8   80.81    2.78
   9  -5  -7    3.58    1.86
   9  -3  -5  334.09    4.09
  10  -7  -7   25.35    2.19
  10  -4  -5   68.12    2.62
  10  -3   0    1.88    1.98
  11 -12  -5    0.18    1.53
  11 -10  -6   57.21    2.63
  11  -8  -6    5.54    2.07
  11  -7  -6   31.17    2.84
  11  -6  -5   23.04    2.43
  11  -5  -4   16.28    2.38
  12  -9  -3    3.62    1.94
  12  -9  -2    0.62    1.87
  12  -8  -2   66.58    2.91
   6   0  -2  427.17    3.37
   8  -4  -7   35.43    1.99
   8  -3  -6    0.95    1.24
   8  -1   2    0.66    1.53
  11  -4  -1   18.21    2.79
  12 -10  -3    6.01    1.72
  12 -10  -1    3.14    1.51
  12  -9  -4    7.36    2.00
  12  -8  -4   14.11    2.29
  12  -8  -1   16.07    2.26
  12  -7  -2   12.66    2.28
  12  -7  -1   19.98    2.66
   8  -2  -5  120.12    2.43
   8  -1  -3  360.98    3.84
   9  -2  -4   10.57    1.67
  10  -4   3    1.88    2.20
  11  -9  -7   39.26    2.63
  11  -8   3    3.76    1.82
  11  -6  -6   96.50    3.22
  11  -4   0    8.93    2.76
  12  -8   0   61.22    2.73
  12  -7  -4   14.00    2.37
  12  -6  -3   13.21    2.84
  12  -6  -2   37.08    3.02
   6  -2  -6   84.20    1.84
   7  -5  -8  198.13    2.78
   7   0  -2  153.59    2.55
   9  -6  -8   24.16    1.85
   9  -4  -7    7.05    1.82
   9  -3  -6   13.44    1.67
  10  -9  -8   77.50    2.63
  10  -8  -8   76.48    2.69
  10  -5  -7   29.88    2.51
  10  -4  -6   85.77    2.79
  10  -3  -5    4.52    2.16
  10  -2  -2   18.52    2.32
  11 -10  -7    4.87    1.67
  11  -8  -7   59.49    2.78
  11  -7   3   48.43    2.44
  12  -7  -5   25.21    2.57
  12  -6  -1    4.36    2.08
   7  -3  -7   10.72    1.45
   8  -1  -4   83.18    2.19
   9  -2  -5   96.80    2.73
   9  -1  -2   78.61    2.42
   9  -1  -1   42.07    2.08
  10  -7  -8    3.96    1.79
  10  -2  -3   55.35    2.49
  10  -2   0   41.85    2.40
  12 -11  -5    1.96    1.53
  12  -9  -6    1.08    1.79
  12  -8  -6   17.58    2.15
  12  -6  -5    8.04    2.58
  12  -6   0    1.54    2.12
   8  -3  -7   18.36    1.71
   8  -2  -6   18.32    1.75
   9  -5  -8    4.12    1.82
   9  -1  -3  104.35    2.63
   9  -1   1  107.13    2.66
  12 -10  -6    5.10    1.72
  12  -7  -6    2.09    2.03
  12  -7   1   10.88    2.02
  12  -5  -1   29.63    2.51
   7  -4  -8   60.05    1.90
   8   0  -2   39.27    2.05
  10  -4  -7   20.98    2.02
  10  -2  -4  173.63    3.51
  11  -9  -8    2.78    2.09
  11  -8  -8   49.73    2.77
  11  -4   2    6.58    2.26
  12  -6  -6   18.37    2.37
  12  -6   1   13.46    2.39
  12  -5  -5    6.67    2.29
  13  -9  -3    3.17    1.86
  13  -8  -3    7.66    2.07
   8  -4  -8   45.70    1.83
   8  -1  -5   87.72    2.21
   9  -3  -7    3.23    1.49
   9  -2  -6  162.06    3.20
  10  -5  -8   40.75    2.66
  10  -2  -5   42.52    2.55
  11 -10  -8   41.29    2.10
  11  -5  -7   11.44    2.22
  12 -10  -7    1.48    1.72
  12  -7  -7    7.05    2.43
  12  -4  -4   59.76    3.33
  12  -4  -3  102.83    3.52
  12  -4  -2    6.77    2.26
  12  -4  -1   10.49    2.76
  13  -9  -4    4.47    1.71
  13  -8  -4    2.04    1.92
  13  -7  -4    8.78    2.46
  13  -7  -3   72.18    2.97
  13  -7  -2    4.10    2.26
   6   1  -1  259.27    2.75
   6   1   2   41.99    1.41
   8   0   2  197.01    3.06
   9  -6  -9   24.21    2.02
  10  -8  -9   57.07    2.64
  10  -1  -2   43.62    2.53
  11  -6  -8   22.49    2.56
  12  -7   2   -0.13    1.62
  12  -5  -6    8.04    2.32
  12  -5   1    4.51    2.29
  13  -9  -5   15.76    1.91
  13  -8  -5   12.64    2.09
  13  -7  -5    1.26    2.04
  13  -7  -1    1.47    2.09
  13  -6  -4   57.90    3.25
  13  -6  -3   13.17    2.26
  13  -6  -2   72.81    3.26
  10  -7  -9    7.14    1.72
  10  -3  -7   47.73    2.65
  10  -1  -3   43.58    2.35
  11  -2  -4   37.99    2.86
  12  -6  -7    1.10    2.16
  12  -6   2    9.25    2.06
  12  -4  -5   11.44    2.43
  12  -4   0   34.85    2.51
  13  -6  -5   11.62    2.67
   7   1  -1  110.31    2.16
   8  -5  -9   94.25    2.42
   8  -2  -7  104.66    2.34
   9   0  -2    7.66    1.58
  10  -4  -8    0.10    1.66
  10  -2  -6  154.37    3.33
  10  -1  -4   16.96    2.00
  11  -5  -8    7.97    1.97
  12  -8  -8   52.17    2.52
  12  -7  -8    5.98    2.41
  12  -3  -4    5.83    2.66
  13 -10  -6    1.92    1.42
  13  -7   0    1.64    1.87
  13  -6  -1    3.54    1.99
  13  -5  -4   41.70    2.84
  13  -5  -3   31.31    2.61
  13  -5  -2    3.03    2.38
   7  -3  -8   68.79    1.79
   7   1  -2   75.79    2.10
   9  -2  -7   62.86    2.36
  11  -9  -9   19.20    2.03
  11  -8  -9   75.25    2.58
  11  -7  -9   98.44    3.23
  12  -4   1   32.61    2.36
  12  -3  -1    3.43    2.36
  13  -9  -7    9.05    1.88
  13  -6   0   35.88    2.56
   5  -1  -6   66.11    1.47
   6  -3  -8  104.57    1.96
   9  -1  -6   45.88    2.32
   9   0  -4  194.32    3.46
  11  -6  -9   36.52    2.53
  11  -2   1  110.77    3.11
  12  -3   0    2.72    2.07
  13  -7  -7    3.75    1.98
  13  -4  -3    4.07    2.59
   8  -4  -9   49.36    2.00
  10  -3  -8    1.89    2.02
  11  -1  -3   11.21    2.16
  12  -5  -8    7.64    2.38
  12  -4  -7   33.11    2.58
  12  -2  -3   17.01    2.87
  13  -6  -7   13.12    2.22
  13  -5   0   33.09    2.60
  13  -4  -5   24.00    2.59
  14  -8  -5   -0.94    1.66
  14  -8  -4    2.41    1.49
  14  -7  -4    8.51    2.02
   9  -4  -9   82.25    2.36
  10   0  -2   41.37    2.29
  11  -5  -9   57.29    2.86
  11  -1  -4  128.01    3.46
  12  -8  -9    8.93    1.75
  12  -7  -9   14.44    2.22
  12  -2  -4  116.07    3.59
  12  -2  -1  184.98    4.38
  13  -9  -8    1.64    1.63
  13  -7  -8    3.92    2.13
  13  -4  -1   37.01    2.60
  14  -7  -2    6.87    1.74
  14  -6  -4   13.90    2.27
  14  -6  -3   15.70    2.21
   7  -1  -7   15.66    1.41
   8  -2  -8  122.28    2.63
   8  -1  -7  208.67    3.17
   8   1  -3  374.69    3.99
  10  -4  -9   15.75    1.86
  10   0  -4   11.48    2.18
  10   0   0    5.92    1.70
  11  -1  -5    4.49    2.03
  12  -3  -7    6.65    2.52
  12  -2  -5   76.25    3.15
  13  -6  -8    3.18    2.17
  13  -3  -3   45.57    2.70
  14  -8  -6    4.14    1.50
  14  -6  -5    3.95    1.87
  14  -6  -2   -0.28    1.87
   6   1  -4   22.42    1.22
   7  -2  -8  517.30    4.05
   7   1  -4  315.09    3.35
   9  -2  -8    3.80    1.42
   9  -1  -7   21.65    1.70
   9   1  -2   73.41    2.56
   9   1  -1   41.42    2.24
  10  -6 -10  313.09    4.23
  11  -2  -7   15.28    2.18
  12  -2  -6   46.41    3.04
  13  -4  -7    1.59    2.51
  13  -4   0   17.34    2.13
  13  -3  -5   95.12    3.45
  14  -8  -7    1.58    1.64
  14  -6  -6   -0.84    1.84
  14  -5  -4    4.61    1.93
  14  -5  -3   26.17    2.24
   6   2   0   16.88    1.22
   9  -5 -10   22.62    1.85
   9  -3  -9  142.61    2.79
   9   1  -3  103.04    2.57
   9   1   0    3.66    1.44
  10  -2  -8   26.84    1.96
  11  -7 -10   61.96    2.38
  11  -1  -6   41.62    2.45
  11  -1   1   66.24    2.54
  12  -5  -9    5.63    1.95
  12  -1  -3   17.10    2.63
  13  -3  -6   10.48    2.25
  13  -3  -1   22.91    2.21
  14  -7  -7    5.39    1.68
  14  -6  -7    5.09    2.10
  14  -5  -6   22.41    2.53
  14  -5  -2   25.47    2.15
   7  -3  -9    5.14    1.15
   9   0  -6   55.43    2.13
  10  -3  -9    3.88    1.67
  10  -1  -7   82.26    2.62
  11  -6 -10    7.88    1.75
  11   0  -4  153.29    3.74
  11   0  -2   62.46    2.68
  12  -3  -8   15.17    2.19
  12  -2   1  103.83    3.16
  12  -1  -4    0.56    2.13
  12  -1  -2    0.89    2.09
  13  -8  -9   15.75    1.72
  13  -7  -9    5.38    1.73
  14  -4  -5   15.77    2.45
   6   2  -2  718.83    4.43
  10   0  -6   35.21    2.42
  11  -2  -8   14.11    2.07
  12  -7 -10   48.35    2.16
  12  -4  -9    3.43    1.79
  12  -2  -7   11.18    2.20
  13  -6  -9    1.75    1.74
  13  -3  -7   49.23    2.73
  13  -2  -5    8.52    2.23
  14  -8  -8    8.44    1.53
  14  -7  -8    1.38    1.50
   7   2  -2  553.40    4.23
   7   2   1  206.24    2.61
   8   1  -5   89.36    2.22
   9  -1  -8   22.25    1.89
  10   1  -3   41.82    2.18
  11  -1  -7    8.10    1.97
  12  -1   0   71.60    2.89
  13  -5  -9    2.07    1.90
  13  -2  -6   18.33    2.31
  13  -2  -1    9.50    2.25
  14  -6  -8   19.64    1.93
  14  -3  -4   25.05    2.50
   5   0  -6   20.99    0.94
   8  -2  -9   35.36    1.68
   8   2  -2   38.20    1.68
   8   2  -1    2.90    1.26
   8   2   0   78.64    2.10
   9   1  -5    7.26    1.57
  11  -4 -10   85.95    2.85
  13  -3  -8   39.13    2.79
  14  -5  -8    1.40    1.66
  14  -4  -7    6.32    1.98
  14  -4  -1    0.88    1.52
  15  -6  -5    3.92    1.39
   6   2  -3  587.89    3.98
   8   2  -3   21.94    1.51
  10   1  -5  126.39    3.09
  11   0  -6   94.38    2.89
  12  -3  -9   28.33    2.16
  12  -1  -7    3.38    2.32
  12   0  -4    5.36    2.02
  13  -7 -10    1.48    1.37
  13  -2  -7   13.00    2.19
  14  -7  -9    2.46    1.36
  14  -6  -9    2.07    1.77
  15  -5  -4    9.45    1.71
   8   2   1    5.38    1.26
   9   2  -1   82.88    2.40
  10   1   1   10.61    1.76
  11  -1  -8   10.64    1.88
  11   1  -2    9.76    2.27
  13  -6 -10    7.73    1.56
  13  -2   0   14.32    1.82
  13  -1  -5    8.68    2.12
  14  -3  -7   74.52    2.87
  15  -6  -7   -0.82    1.25
  15  -5  -6   -0.42    1.38
   5   2  -3  264.72    2.48
   8  -3 -10   12.70    1.33
   9   2  -3   52.15    1.97
   9   2   0    9.13    1.61
  11   1  -4  110.18    3.03
  13  -5 -10   31.61    1.98
  13  -3  -9   37.14    2.48
  13  -2  -8   25.05    2.46
  13  -1  -6    9.88    2.11
  13  -1  -1   77.33    2.82
  14  -5  -9   19.47    1.89
  14  -3  -1    1.03    1.48
  14  -2  -3   25.94    2.16
  15  -4  -5    0.60    1.44
   9   0  -8    2.79    1.52
  10   1  -6   35.82    2.00
  11  -5 -11   19.47    1.82
  11   1  -5    6.67    1.86
  12  -6 -11   37.71    2.05
  12  -2  -9   19.13    2.10
  12  -1  -8    8.89    1.99
  13  -1  -7   24.61    2.48
  14  -4  -9   11.85    2.02
  14  -3  -8   11.47    1.97
  14  -2  -2   16.60    2.02
  10   0  -8    3.69    1.51
  10   2  -3   48.05    2.04
  10   2  -2   20.80    1.73
  12  -3 -10   31.38    2.09
  14  -2  -7    0.21    1.69
  -3   3  15  116.47    1.11
  -2   1  14    1.71    0.52
  -2   5  16   17.92    0.55
  -1   5  16    4.46    0.43
   1   1  14    7.44    0.51
   2  -3   5  535.31    1.41
   2  -3   7  181.51    0.96
   2  -2  10    4.78    0.57
   3   1  13    4.17    0.55
   4  -2   9   91.13    0.92
   5  -2   8   77.95    0.83
  -4   4  15    3.87    0.47
  -2   6  16   25.50    0.54
   2  -3   6    1.90    0.27
   3  -1  11   11.67    0.60
   3   0  12    4.31    0.60
   3   3  14    7.75    0.49
   4   2  13    5.02    0.45
   4  -1  10    1.63    0.51
   5   2  12   25.56    0.65
  -5   5  14    1.12    0.45
  -4   6  15    0.02    0.42
  -2   2  14    2.62    0.59
   2   0  12    4.37    0.61
   2   1  13   25.66    0.71
  -5   2  11    1.79    0.34
  -4   7  15   35.84    0.57
  -1   0  12  435.07    1.89
  -1   2  14   11.99    0.58
  -1   4  15    3.85    0.50
   0   2  14    6.82    0.52
   0   4  15    7.00    0.45
   1   1  13    1.66    0.58
   1   5  15   17.89    0.48
   2   3  14    0.99    0.42
   3   2  13   12.03    0.52
   4   3  13   41.30    0.68
   5   0  10   51.80    0.80
   5   1  11   64.99    0.86
   6   1  10    7.15    0.54
  -5   3  12    9.32    0.43
  -4   1  11  151.39    0.94
  -4   4  14    3.67    0.41
  -3   3  14   28.38    0.62
   0   5  15   59.15    0.77
   1   6  15    3.22    0.31
   3  -2   8  147.85    1.03
   3   1  12    8.52    0.58
   3   5  14    2.35    0.33
   4  -2   7    6.89    0.43
   5  -2   6   74.42    0.70
   5   3  12    4.42    0.42
  -4   2  12  182.73    1.13
  -3   6  15    2.47    0.36
  -3   7  15    4.11    0.39
  -3   8  15    0.35    0.31
  -2   3  14    1.45    0.51
  -2   5  15   17.93    0.53
  -1   5  15   80.96    0.85
   1  -2   8  538.79    1.69
   1   3  14   15.92    0.56
   2  -2   8   49.32    0.61
   2  -1  10   30.66    0.61
   2   2  13   50.06    0.83
   4  -1   9  181.86    1.22
   4   2  12   15.63    0.54
   4   4  13    8.09    0.39
   5  -1   8  106.30    0.99
   6  -1   7  117.75    0.95
  -4   1  10   75.53    0.66
  -4   5  14    4.81    0.50
  -3   4  14   17.11    0.62
  -2  -1   7   59.12    0.49
  -2   6  15    0.44    0.40
  -2   7  15    2.12    0.39
  -2   8  15    2.25    0.34
  -1   6  15    2.54    0.39
   0   3  14    2.13    0.50
   1  -1  10    4.73    0.42
   2   1  12    2.02    0.57
   3   3  13    7.21    0.47
   4   0  10    1.38    0.57
   4   1  11   46.56    0.85
   5  -2   5   16.46    0.38
  -5   2   8   17.92    0.30
  -2   1  12   20.16    0.56
  -1  -1   9  311.40    1.30
  -1   7  15   17.43    0.50
  -1   8  15    4.61    0.34
   1   4  14   18.28    0.61
   2   5  14    3.75    0.42
   3  -1   9  137.02    1.10
   4  -2   6   93.54    0.73
   4   5  13   35.08    0.61
   5   2  11   44.73    0.73
  -3   6   3   90.91    0.69
  -1  13   3   30.02    0.79
   0   3   7    8.02    0.35
   0   5   8  163.00    1.23
   0  14   3    5.02    0.59
   1   4   8  271.81    1.49
   1  10   8   29.52    0.87
   1  13   6    6.10    0.60
   3  15   4    4.24    0.46
   5  12   7    8.04    0.52
   6   7   8    1.75    0.52
  -3   9   3  137.75    1.05
  -2   7   7   62.61    0.89
  -2  10   6   19.98    0.74
  -2  11   5   15.69    0.73
  -1   4   7   26.07    0.51
  -1   7   8   44.59    0.82
  -1   8   8  172.57    1.51
  -1  13   4    4.31    0.63
   0  10   8    3.26    0.75
   1   2   7   11.24    0.35
   1  14   5    6.51    0.58
   2   3   8   27.39    0.60
   2   8   9   40.89    1.01
   2  11   8   34.25    0.91
   2  15   4    3.79    0.52
   3   3   8    9.30    0.50
   3   7   9   24.63    0.86
   3   8   9    5.10    0.67
   3  11   8   48.09    0.97
   5  10   8   13.89    0.64
   6   9   8    5.32    0.54
  -2   4   6  489.94    1.65
  -2   6   7   18.61    0.53
  -2   8   7   17.43    0.62
  -1  11   7   20.04    0.90
  -1  12   6    6.34    0.64
   0   4   8  234.16    1.37
   0  12   7    4.65    0.74
   0  14   4   36.61    0.82
   1   6   9   11.55    0.67
   1   8   9  169.05    1.55
   1  11   8    8.29    0.72
   2  13   7   15.71    0.74
   2  14   6   29.35    0.81
   3  13   7   34.36    0.79
   4   7   9   10.22    0.70
   4  14   6    6.08    0.46
  -3   6   5  358.47    1.49
  -3   9   5  101.21    1.04
  -2   3   5  339.55    1.20
  -2   5   7  335.84    1.55
  -1   5   8   33.44    0.64
  -1  13   5    8.30    0.71
   0   7   9    1.48    0.64
   0  11   8   17.82    0.85
   1   3   8    4.02    0.37
   1   5   9   34.26    0.77
   1   9   9  112.59    1.35
   1  13   7   43.86    0.95
   2   5   9   97.86    1.08
   2  12   8   59.86    1.07
   3  12   8   11.44    0.68
   4   6   9   10.38    0.57
   4   8   9    6.91    0.57
   4   9   9   36.29    0.88
   6  10   8   33.62    0.72
  -3   5   5  122.50    0.84
  -3   7   6   57.87    0.73
  -3  10   4   20.72    0.56
  -2  12   5    5.53    0.66
  -1   2   6   26.47    0.41
   0   2   7  193.51    1.04
   0   6   9   30.62    0.73
   0   9   9    6.89    0.66
   0  14   5    7.73    0.58
   1  10   9    5.97    0.67
   1  12   8   42.51    0.92
   1  14   6   42.58    0.85
   1  15   4    1.89    0.43
   2  10   9   15.84    0.74
   3  10   9   14.76    0.65
   4  12   8   19.39    0.62
  -3   6   6  522.85    1.87
  -3   9   6   14.94    0.57
  -3  10   5    3.54    0.44
  -2   6   8   47.69    0.79
  -2   7   8   13.37    0.57
  -2   8   8   29.59    0.74
  -1  12   7    7.98    0.65
   0   5   9   58.07    0.83
   0  10   9    7.08    0.75
   0  13   7    6.65    0.66
   2   1   7   94.14    0.72
   2   4   9  112.86    1.06
   4  10   9    7.50    0.55
   5   6   9    2.73    0.54
   5   8   9    9.88    0.54
   5   9   9   65.27    0.95
  -3   5   6  170.03    1.06
  -3   7   7   58.04    0.83
  -3  10   6   19.34    0.71
  -2   3   6  187.01    0.96
  -2   9   8   10.41    0.64
  -2  11   7   41.03    0.87
  -2  12   6   28.35    0.86
  -1   6   9   75.14    0.97
  -1   7   9    5.76    0.57
  -1  11   8    1.24    0.59
  -1  13   6    0.79    0.54
   0  12   8   32.55    0.85
   0  14   6    3.54    0.58
   1  11   9   90.22    1.21
   1  15   5    2.25    0.42
   2   2   8   50.29    0.63
   2  11   9   17.40    0.70
   2  14   7    5.12    0.53
   3  11   9   12.44    0.61
   3  14   7    2.09    0.39
   5  12   8    5.26    0.42
  -3   9   7   33.75    0.82
  -2   5   8   34.71    0.64
  -1   5   9  104.07    1.10
  -1  10   9    0.49    0.71
   0  11   9   24.16    0.93
   1   1   7    9.11    0.32
   1   2   8  551.73    1.90
   1   7  10  249.86    1.82
   1   8  10  348.41    2.21
   1  13   8    2.34    0.59
   1  14   7    1.76    0.56
   2  13   8    2.45    0.48
   3  13   8    2.70    0.44
   4  11   9    2.69    0.48
   5  10   9   20.71    0.60
  -1  14   5    0.57    0.49
   0   8  10    8.14    0.72
   1   9  10    0.36    0.62
   2   6  10   18.35    0.70
   2   9  10    2.01    0.55
   2  12   9    7.60    0.61
   3   7  10  103.34    1.21
   3   8  10    2.27    0.56
  -6   7   7   79.87    1.03
  -6   8   7   74.42    1.07
  -6   8   8  114.77    1.30
  -6   9   7   23.19    0.78
  -6   9   8    7.79    0.65
  -5   4   9   72.73    0.95
  -5   6  11    3.19    0.58
  -5  10  11    2.97    0.73
  -5  12   6    4.48    0.73
  -4  12  11    3.51    0.67
  -3   6  13   13.94    0.68
  -3   9  13   22.21    0.91
  -3  12  12   11.32    0.66
  -3  13  11   19.54    0.74
  -3  15   6    0.83    0.57
  -2   5  13    3.19    0.61
  -2  15   9    6.09    0.53
  -1  11  13   35.60    0.80
  -1  13  12    0.59    0.38
  -1  14  11    1.41    0.45
   0  13  12    2.52    0.39
   1  13  12    1.25    0.27
  -5   5  10    5.15    0.49
  -5   7  11   29.67    0.87
  -5   9  11   49.08    1.08
  -5  12   7  108.23    1.38
  -4   6  12   10.87    0.69
  -3   3  11  156.36    1.29
  -3   7  13   58.33    1.05
  -2  10  13    7.79    0.70
   0  11  13   22.55    0.60
   0  14  11    0.38    0.37
   1  15  10    6.42    0.35
  -5   6  10   42.84    0.91
  -5  10   4  126.92    1.38
  -5  10  10   85.47    1.32
  -5  11   9   52.79    1.10
  -4   7  12   21.33    0.80
  -4   8  12    5.49    0.71
  -4   9  12   39.03    1.00
  -4  12  10   96.04    1.42
  -3  11  12    3.45    0.66
  -3  14   9    0.81    0.56
  -2   6  13   12.57    0.65
  -2   9  13   17.04    0.82
  -2  14  10    2.00    0.57
  -1  10  13    0.85    0.60
  -1  16   7    0.79    0.37
   0  16   8    0.96    0.35
   1  10  13    3.73    0.45
   1  14  11    0.21    0.22
   1  14  11    0.37    0.15
  -5   5   9   17.69    0.58
  -5   7  10    9.84    0.73
  -5   8  10  119.20    1.46
  -5   9  10    5.01    0.70
  -5  11   6    6.48    0.63
  -5  11   8    1.28    0.64
  -4   5  11  111.28    1.22
  -4  13   5   19.94    0.78
  -4  13   6   49.98    1.07
  -3   5  12  129.80    1.32
  -3  12  11   15.08    0.77
  -3  13  10   15.08    0.74
  -3  14   8   10.27    0.76
  -2   4  12    4.90    0.55
  -2   7  13   46.43    0.95
  -2  13  11    3.23    0.56
  -2  15   8   29.90    0.74
  -1   6  13    3.99    0.64
  -1  12  12    7.69    0.61
  -1  15   9    2.71    0.43
   0  10  13    7.29    0.53
   2  12  12    5.62    0.34
   3  11  12    0.45    0.28
  -5   5   8  395.86    1.95
  -5   6   9    1.78    0.46
  -5   8   4  150.84    1.30
  -5   9   4    1.11    0.45
  -5  10   9   21.86    0.86
  -4   4  10   45.90    0.76
  -4   6  11    0.79    0.60
  -4  10  11   14.66    0.83
  -3   6  12    1.68    0.68
  -2  11  12    2.39    0.71
  -2  15   7   18.53    0.72
  -1   9  13    6.08    0.60
  -1  16   5    0.94    0.41
   0   7  13   24.06    0.75
   0   9  13   13.43    0.67
   0  12  12   21.51    0.61
   1   8  13   40.36    0.80
   1  12  12   21.51    0.55
   1  16   8    5.59    0.30
  -5   8   9    1.80    0.57
  -5   9   9   46.93    1.01
  -5  10   7    2.54    0.61
  -4   7  11  196.63    1.70
  -4   8  11   12.92    0.85
  -4   9  11   40.24    1.01
  -3   3  10    3.72    0.36
  -3   7  12   24.08    0.81
  -3   8  12   39.61    1.05
  -3  13   9   68.93    1.22
  -3  14   6  105.91    1.33
  -3  14   7    4.66    0.64
  -2   3  11  270.59    1.60
  -2   5  12   43.21    0.91
  -2  14   9    4.62    0.58
  -2  15   5   38.27    0.88
  -2  15   6   17.36    0.73
  -1  13  11    3.83    0.54
  -1  14  10    6.66    0.53
   0  15   9    2.42    0.41
   0  16   7    0.25    0.36
  -5   6   7   36.50    0.68
  -5   6   8  126.75    1.20
  -5   8   5   66.02    0.94
  -5   8   8  103.23    1.27
  -5   9   6   48.53    0.95
  -5   9   7   33.17    0.91
  -4   4   9    2.68    0.37
  -4   5  10   11.38    0.55
  -4  10  10   26.26    1.00
  -4  12   5   36.90    0.99
  -4  12   8   73.54    1.21
  -3  12  10   61.33    1.15
  -2  10  12   14.74    0.79
  -2  12  11    0.92    0.62
  -2  13  10    5.05    0.65
  -1  11  12    7.95    0.63
  -1  15   8    0.52    0.46
   0  13  11    4.20    0.49
   0  14  10   18.30    0.65
   1  13  11    6.22    0.47
   1  15   9    3.55    0.41
   2  11  12    3.31    0.41
   2  13  11    1.67    0.33
   3  14  10    1.11    0.22
  -5   7   7  183.30    1.43
  -4   6  10   22.21    0.74
  -4  11   9   35.15    0.98
  -4  12   7   36.90    0.96
  -3   5  11  103.26    1.16
  -3  10  11    5.28    0.72
  -2   6  12   50.15    0.94
  -1   5  12   16.42    0.69
   0  11  12   20.32    0.67
   0  16   6   39.24    0.71
   1  11  12    5.53    0.51
   1  14  10   21.26    0.57
   1  16   7    0.32    0.37
   2  14  10    1.19    0.31
   2  15   9   12.33    0.38
  -4   5   9   26.90    0.69
  -4   7  10   41.57    0.89
  -4   8  10  175.82    1.64
  -3   6  11   13.09    0.74
  -3  11  10   24.72    1.00
  -2   7  12    1.84    0.59
  -2   8  12   21.68    0.79
  -2  11  11   48.17    1.05
  -1  10  12    5.96    0.65
  -1  12  11    7.19    0.63
  -1  14   9    2.38    0.54
  -1  15   7   16.48    0.67
   0  15   8    3.69    0.53
   0  16   5    0.94    0.46
   2  10  12   29.14    0.70
   2  16   7    0.85    0.32
  -4  11   5    7.89    0.74
  -4  11   7    3.91    0.76
  -3   7  11   24.08    0.78
  -3   8  11    3.04    0.65
  -3  13   4    4.26    0.58
  -3  13   5   54.55    1.11
  -3  13   6    2.85    0.79
  -2  12  10  105.57    1.38
  -2  13   9   77.89    1.20
  -2  14   7    1.07    0.63
  -1   6  12   50.18    0.94
  -1  13  10    8.74    0.65
  -1  15   6   -0.72    0.61
   0  10  12   41.36    0.87
   0  12  11    5.61    0.65
   1  10  12   61.39    0.98
   4  11  11    0.80    0.31
   4  13  10    7.33    0.34
  -4   9   9  127.25    1.45
  -4  10   8   49.74    1.03
  -4  11   6   23.64    0.81
  -3   5  10    8.66    0.57
  -3  10  10    1.95    0.69
  -3  12   8    6.44    0.83
  -2   5  11   12.95    0.64
  -2  14   6   19.91    0.87
  -1   7  12   21.01    0.75
  -1   8  12  124.86    1.41
  -1  11  11   19.09    0.91
  -1  15   5   43.87    0.96
   0   6  12  217.69    1.69
   0   9  12    7.23    0.73
   0  13  10    2.10    0.62
   0  14   9   14.69    0.63
   1  12  11    2.31    0.48
   1  15   8   -0.09    0.46
   2  12  11    5.71    0.47
   4  14   9    0.96    0.27
  -4   9   3  249.56    1.62
  -4   9   8   10.00    0.73
  -4  10   4    9.07    0.54
  -3   9  10   20.41    0.93
  -3  11   9   29.49    0.95
  -2   6  11    1.49    0.61
  -2   9  11   37.46    1.05
  -1   4  11    3.52    0.45
   0   7  12    7.54    0.61
   0  15   7   49.95    0.88
   1   6  12   74.20    0.99
   1   8  12   12.76    0.73
   1   9  12    2.26    0.54
   1  13  10   20.97    0.72
   1  14   9    2.27    0.55
   1  16   5   -0.17    0.45
   2   8  12   28.42    0.70
   2  15   8    2.86    0.45
   2  16   6   18.74    0.56
   3  13  10    3.01    0.36
   3  15   8    0.50    0.34
  -4   6   8  186.90    1.40
  -4   7   8  111.66    1.18
  -4   8   8   79.21    1.09
  -4   9   4  136.40    1.26
  -4  10   5    1.21    0.50
  -3   6  10  271.40    1.81
  -3   7  10    1.81    0.62
  -3   8  10    9.42    0.68
  -3  12   7    2.34    0.64
  -2   4  10   78.50    0.96
  -2   7  11    2.77    0.60
  -2   8  11   30.19    0.88
  -2  11  10    2.69    0.71
  -1  12  10   14.88    0.80
  -1  13   9   17.65    0.77
   0  11  11    7.42    0.68
   2  13  10    0.59    0.41
   2  14   9    1.37    0.48
   3  11  11   55.89    0.80
   3  14   9    1.42    0.36
   3  16   6    7.12    0.41
  -4   6   7   56.10    0.78
  -4   8   7   14.02    0.65
  -4   9   5  254.13    1.73
  -4   9   6   90.40    1.16
  -4   9   7   43.99    0.88
  -3  11   8    4.37    0.71
  -3  12   4   27.88    0.83
  -3  12   5   30.35    0.92
  -1   3  10    8.03    0.40
  -1   5  11    5.58    0.51
  -1  14   7    2.95    0.62
   0  14   8   11.29    0.74
   0  15   6    2.39    0.57
   1  11  11  113.03    1.26
   1  16   3   20.63    0.66
   2  11  11   44.80    0.82
   4  12  10   10.06    0.47
   5  13   9    0.99    0.29
  -4   7   6   11.00    0.54
  -4   7   7  359.87    1.93
  -4   8   5    9.32    0.50
  -4   8   6    7.76    0.49
  -3   5   9  152.00    1.26
  -3   9   9   35.30    0.92
  -2   5  10   68.31    0.96
  -2  10  10   25.31    0.90
  -2  13   3   20.98    0.81
  -2  13   6    1.66    0.75
  -1   6  11    1.65    0.60
  -1   8  11    6.16    0.73
  -1   9  11   39.57    0.97
  -1  14   6    8.85    0.80
   0  12  10   26.67    0.85
   0  13   9    6.83    0.67
   0  15   5   14.89    0.75
   2  16   5    8.40    0.48
   3  10  11    4.58    0.56
   4   9  11   10.39    0.52
   5  11  10    0.26    0.34
   5  14   8    2.14    0.29
  -3   6   9  105.52    1.13
  -3   7   9  146.52    1.38
  -3   8   9    2.94    0.57
  -3  10   8  152.68    1.58
  -3  11   7   44.56    0.99
  -2  11   9    6.75    0.75
  -2  13   5  116.24    1.46
  -1   7  11   13.81    0.69
   0   5  11   61.68    0.93
   0  15   3   18.40    0.78
   0  15   4    0.41    0.68
   1  10  11   27.65    0.82
   1  12  10    7.61    0.62
   1  14   8   19.66    0.79
   2  10  11   23.70    0.74
   2  12  10   36.20    0.86
   2  15   7   31.97    0.72
   3  12  10    2.02    0.44
   3  15   7   11.57    0.54
   3  16   5   -0.43    0.38
   4  15   7    3.53    0.39
  -3  11   5   38.26    0.89
  -3  11   6   23.68    0.81
  -2   6  10   19.26    0.69
  -2   8  10    3.81    0.63
  -2  12   7    8.76    0.83
  -1   4  10   15.61    0.52
  -1  10  10   18.07    0.94
  -1  14   3    1.20    0.57
   0   6  11   78.97    1.12
   0   8  11    3.02    0.76
   1  13   9   23.51    0.78
   1  15   6    3.62    0.55
   2  14   8    9.39    0.66
   2  16   3    0.27    0.46
   3   9  11   24.02    0.75
   4  13   9    2.69    0.38
   4  14   8    6.81    0.47
   4  16   5    0.77    0.32
  -3   8   8   13.50    0.70
  -2  10   9    8.25    0.74
  -2  11   8    3.14    0.70
   0   7  11  192.44    1.64
   0  13   8    3.37    0.75
   1   6  11    7.33    0.66
   1   8  11    6.92    0.75
   2   9  11   23.39    0.77
   2  13   9   31.74    0.79
   3   8  11   38.48    0.85
   3  13   9    4.98    0.50
   3  14   8   56.05    0.86
   4  11  10    1.67    0.45
   6  13   8    1.20    0.31
  -3   7   8  194.67    1.50
  -3   9   7   32.18    0.87
  -3  10   4   22.63    0.72
  -3  10   6   18.63    0.72
  -2   5   9   43.99    0.78
  -2   9   9   22.09    0.82
  -1   5  10   41.87    0.78
  -1   9  10   19.70    0.83
  -1  11   9   89.81    1.34
   0  10  10  165.03    1.72
   0  14   6    3.00    0.64
   1   7  11  156.34    1.47
   1  11  10    0.27    0.64
   1  14   7    0.21    0.65
   1  15   5    2.22    0.56
   2   6  11    9.09    0.54
   2   7  11    6.71    0.68
   2  11  10   20.12    0.83
   2  15   6    0.69    0.50
   3  11  10   11.63    0.62
   5  12   9    4.52    0.41
   6  14   7    1.76    0.28
  -3  10   5    2.92    0.51
  -2   6   9   39.62    0.84
  -2   8   9    0.36    0.54
  -2  10   8   18.76    0.93
  -2  11   7   42.11    1.07
  -2  12   3   26.87    0.77
  -2  12   4  157.10    1.61
  -2  12   5    6.75    0.67
  -1   6  10    4.16    0.52
  -1   7  10    9.25    0.64
  -1   8  10    3.52    0.62
  -1  13   6    1.43    0.64
   0   4  10   58.78    0.83
   1  12   9    3.47    0.70
   1  13   8    1.44    0.76
   1  15   4    2.62    0.66
   3  15   6    5.55    0.51
   3  16   3    1.50    0.48
   4  10  10   87.06    1.10
   4  15   6    8.49    0.50
   4  16   4    5.46    0.41
   5   9  10    7.96    0.53
   5  15   6    8.24    0.41
   5  16   4    2.12    0.34
   6  11   9    0.65    0.26
   6  11   9    0.36    0.17
  -3   9   3  135.52    1.19
  -3   9   5   97.64    1.13
  -3   9   6   14.12    0.62
  -2   7   9   60.72    0.97
  -1  10   9   -0.43    0.66
  -1  13   5    7.80    0.71
   0   9  10   72.93    1.20
   0  11   9   24.16    1.00
   1  15   2    1.96    0.65
   1  15   3    6.75    0.65
   2  12   9    6.55    0.68
   2  14   7    5.50    0.62
   2  15   5   47.67    0.98
   3  12   9   -0.01    0.62
   4  12   9    0.27    0.45
   5  13   8   -0.07    0.36
   5  14   7    6.78    0.43
   7  13   7    0.69    0.29
  -3   7   6   53.91    0.82
  -3   9   4    9.26    0.49
  -2  11   6    0.52    0.58
  -1  11   8    2.06    0.70
  -1  13   4    4.37    0.62
   0   6  10   40.23    0.90
   0  14   2   12.17    0.76
   1  14   6   40.97    0.96
   2  10  10   97.59    1.28
   2  13   8    2.29    0.62
   3  10  10   32.12    0.84
   3  14   7    1.94    0.53
   4   9  10    0.27    0.57
   4  13   8    3.59    0.50
   4  14   7    2.92    0.47
   4  16   3    7.69    0.46
   5   8  10   25.71    0.70
   5  11   9   44.60    0.83
   5  16   3    0.32    0.36
   6  16   3    0.24    0.29
  -2  10   7    5.45    0.63
  -2  11   3   18.26    0.71
  -2  11   5   15.11    0.73
  -1   5   9   91.57    1.04
  -1   9   9    6.60    0.69
  -1  12   6    5.49    0.84
   0   7  10    9.68    0.65
   0  13   6   24.53    1.01
   1   5  10    5.53    0.57
   1   9  10    0.74    0.61
   2  15   4    3.27    0.67
   3   9  10   10.71    0.77
   3  15   5   25.10    0.74
   6  12   8   17.80    0.54
   7  11   8    0.80    0.35
  -2   6   8   48.68    0.79
  -2   7   8   13.34    0.58
  -2   9   7  327.20    2.11
  -2  10   6   19.20    0.79
  -2  11   4   99.43    1.24
  -1   6   9   69.92    1.01
  -1   7   9    5.40    0.62
  -1   8   9   30.57    0.84
  -1  11   7   19.20    0.97
   0  10   9    7.43    0.76
   1   6  10   27.61    0.83
   1   7  10  244.47    1.88
   1   8  10  359.20    2.28
   1  13   7   43.47    1.06
   1  14   5    6.61    0.69
   2  11   9   18.84    0.85
   2  14   6   34.38    0.91
   2  15   3   59.83    1.09
   4   8  10    3.59    0.62
   4  15   5    9.32    0.55
   4  16   1    4.41    0.48
   5  15   5    0.97    0.39
   5  16   2    7.73    0.48
   6  13   7    8.08    0.50
   6  14   6   16.29    0.55
   8  13   6    2.00    0.25
  -1  12   5   23.89    0.87
   0   4   9    8.51    0.47
   0   9   9    8.03    0.81
   0  12   7    4.17    0.74
   0  13   5    5.13    0.78
   1  10   9    6.72    0.84
   2   5  10   40.06    0.79
   2   6  10   18.89    0.76
   2   7  10   19.15    0.77
   2   8  10  221.53    1.81
   2  12   8   66.00    1.26
   2  13   7   15.86    0.88
   2  15   2   19.30    0.81
   3   6  10   15.10    0.69
   3   7  10  105.38    1.30
   3  11   9   14.16    0.72
   3  14   6   88.21    1.26
   3  15   4    4.42    0.68
   5  10   9   21.91    0.75
   5  12   8    5.81    0.51
   6   9   9   46.97    0.84
  -2   8   7   16.50    0.62
  -2  10   2   45.49    0.78
  -2  10   4   10.86    0.62
   3  12   8   12.23    0.77
   3  13   7   37.02    1.01
   4  12   8   22.30    0.76
   4  14   6    6.56    0.61
   5  13   7   10.50    0.59
   5  14   6    4.71    0.51
   5  16   1    0.90    0.37
   6  15   4    1.78    0.45
   6  16   1    0.97    0.35
   7  12   7    3.26    0.44
  -2   7   7   59.46    0.87
  -2  10   3   31.88    0.72
  -1  10   7   22.15    0.83
  -1  11   6   16.36    0.78
   0   5   9   57.18    0.85
   0   6   9   29.73    0.78
   0   7   9    2.21    0.66
   0   8   9  115.27    1.36
   0  10   8    3.08    0.69
   0  12   6    9.92    0.79
   0  13   2    4.72    0.74
   0  13   3   29.38    0.98
   0  13   4   18.04    0.85
   1   9   9  103.63    1.46
   1  11   8    9.09    0.79
   1  12   7   11.70    0.92
   1  14   1   26.13    0.81
   1  14   2   21.01    0.90
   2  10   9   16.16    0.84
   2  14   5    9.96    0.75
   3  15   3   18.27    0.82
   4  10   9    7.14    0.64
   4  13   7   27.96    0.82
   4  15   4    5.53    0.56
   5  15   4   12.86    0.58
   6   8   9   35.70    0.78
   6  11   8   45.46    0.83
   7  13   6   11.42    0.53
   8  11   7   19.84    0.51
  -2   8   6   13.28    0.55
  -1   5   8   34.26    0.65
  -1   6   8  146.66    1.31
  -1   7   8   44.32    0.83
  -1  11   5   31.64    0.96
   0  11   7    6.10    0.75
   1   4   9   37.92    0.72
   3  14   5   17.93    0.89
   3  15   2   24.05    0.88
   5   9   9   77.89    1.09
  -2   9   3  138.06    1.24
  -2   9   4   42.96    0.76
  -1   9   7   45.76    0.94
  -1  10   6   23.90    0.79
   0   9   8    2.02    0.63
   1   5   9   34.53    0.76
   1   8   9  177.34    1.65
   2   9   9  296.05    2.16
   2  11   8   33.37    0.99
   2  14   4   26.12    0.89
   3   9   9   76.73    1.27
   4  11   8   25.50    0.94
   4  14   5    9.50    0.77
   4  15   3   12.95    0.68
   5   8   9    9.57    0.70
   5  11   8    7.24    0.63
   6  12   7    1.34    0.49
   6  14   5    0.22    0.46
   7  15   3   15.66    0.50
   8  12   6    3.12    0.42
   9  11   6    0.80    0.32
  -2   8   5   37.70    0.72
  -1  11   3   27.63    0.85
   0  10   7   80.45    1.31
   1   6   9   11.88    0.61
   1   7   9    8.06    0.63
   1  10   8   29.10    0.95
   1  12   6   12.77    0.83
   2   8   9   42.83    1.05
   3  13   6    1.70    0.71
   4  15   2    1.04    0.67
   5  12   7    6.94    0.72
   5  14   5    8.48    0.62
   5  15   3    1.33    0.51
   6  10   8   43.00    0.87
   6  13   6    1.78    0.50
   6  15   3    4.43    0.48
   7  11   7   25.20    0.73
   8  10   7    9.20    0.51
   8  13   5   17.46    0.53
   8  15   2    1.11    0.36
   9  14   3   -0.25    0.27
  -1   9   6    2.53    0.58
  -1  10   5   44.50    0.90
   0   8   8    4.13    0.58
   2   5   9   92.24    1.12
   2   7   9    7.91    0.71
   2  10   8  181.53    1.79
   3   8   9    4.80    0.66
   4   8   9    7.62    0.66
   4  12   7    7.49    0.73
   4  13   6    9.85    0.74
   5  13   6   10.62    0.67
   7  14   4   38.42    0.80
   9  12   5    2.69    0.39
  -1   6   7   89.30    0.98
  -1   7   7   49.71    0.82
   0   5   8  157.73    1.26
   0   6   8   39.60    0.76
   0   7   8   27.44    0.72
   0  12   2    9.82    0.76
   0  12   3    0.81    0.58
   1   9   8    2.57    0.65
   1  13   2   78.91    1.29
   1  13   3   65.03    1.17
   2   6   9    3.99    0.54
   2  11   7   83.37    1.41
   2  12   6   70.93    1.35
   2  14   1   19.15    0.82
   3   5   9    5.15    0.55
   3   7   9   26.03    0.79
   3  10   8   37.89    1.04
   4   6   9   10.78    0.70
   4   7   9   11.16    0.68
   4  14   4   25.28    0.95
   4  15   0    4.63    0.63
   5  10   8   13.13    0.73
   5  15   2   34.32    0.85
   6   9   8    5.72    0.66
   6  15   2    0.73    0.56
   7  12   6    7.89    0.59
   9  13   4    4.95    0.38
  -1   8   6  329.46    1.97
  -1  10   4    4.04    0.51
   0   9   7    5.33    0.63
   1   8   8  110.21    1.38
   1  12   5    2.64    0.71
   1  13   1   61.29    1.10
   2   9   8   42.40    1.12
   3  14   3    0.28    0.69
   5  14   4   10.53    0.69
   5  15   1   18.49    0.77
   6  11   7    3.36    0.57
   6  14   4   23.52    0.75
   7  13   5   45.72    0.85
   8   9   7   18.95    0.64
   9  10   6    5.16    0.46
  10  12   4    7.18    0.38
  -1   9   5   28.28    0.72
  -1  10   2  113.30    1.16
   0   8   7    5.38    0.65
   0  11   4   10.98    0.78
   1   7   8    1.20    0.60
   1  11   6   69.04    1.23
   3   9   8   78.24    1.31
   3  11   7  215.65    1.96
   4  13   5   76.18    1.34
   5  11   7   45.87    1.04
   5  15   0    8.22    0.68
   6   8   8   50.91    1.01
   6  12   6   47.62    0.98
   6  13   5   22.22    0.79
   6  15   1    7.48    0.64
   7  10   7    2.54    0.53
   7  15   1   11.90    0.62
   8  11   6   12.50    0.58
   8  14   3    1.07    0.41
   9  15   0    5.22    0.32
  -1   7   6    5.76    0.42
   1   5   8  105.41    1.09
   1   6   8   73.60    1.00
   1  12   4    2.50    0.65
   2  12   5   16.96    0.97
   2  13   3   12.20    0.94
   4   9   8   39.84    0.96
   4  12   6   81.81    1.34
   4  14   3    2.72    0.68
   5  12   6   44.23    1.01
   5  13   5    1.53    0.66
   5  15  -1   22.80    0.73
   7  14   3    0.35    0.54
   8  12   5    1.21    0.52
   8  13   4    1.98    0.46
   9  14   2    1.68    0.38
  10  10   5    2.84    0.39
  10  14   1    6.30    0.37
   0   6   7   14.54    0.59
   0   7   7  209.00    1.57
   0  10   5    1.77    0.55
   0  11   3    2.95    0.55
   1   9   7   15.60    0.75
   1  11   5   41.68    1.09
   2   7   8    5.40    0.68
   2  11   6    1.11    0.71
   3   8   8   32.06    1.01
   5   8   8   77.54    1.19
   5  14   3   25.53    0.87
   6  10   7    5.83    0.65
   6  14   3    6.98    0.65
   6  15   0   22.34    0.72
   7  11   6   18.42    0.78
   7  15   0    5.91    0.57
   8   8   7   16.76    0.61
   8  15   0    2.60    0.39
   9   9   6    6.02    0.51
   9  11   5    3.17    0.50
   9  15  -1    1.80    0.31
  -1   9   3   44.96    0.77
   0  11   1    5.67    0.51
   0  11   2    1.04    0.49
   1  10   6   34.20    0.94
   1  12   2   87.69    1.30
   2   4   8  126.51    1.12
   2   5   8   10.33    0.58
   2   6   8   15.01    0.69
   2  13   0   56.48    1.13
   2  13   1    2.59    0.76
   2  13   2    0.13    0.64
   3  10   7   21.94    0.90
   3  12   5   41.82    1.17
   4   8   8   36.21    0.93
   4  10   7   -0.59    0.80
   4  14   2   50.65    1.11
   5   7   8   59.63    1.08
   6  15  -1    2.27    0.50
   7   9   7   15.94    0.70
   7  13   4    8.13    0.63
   8  10   6   22.21    0.78
   9  12   4   35.14    0.77
   9  13   3   20.73    0.61
   9  15  -2    0.77    0.33
  11  10   4   37.89    0.62
   1   8   7   20.90    0.73
   1  12   0   46.71    0.95
   1  12   1    9.75    0.68
   2   9   7  135.02    1.52
   2  12   4   20.35    0.89
   3   7   8    3.70    0.58
   3  11   6    0.83    0.72
   4   7   8  226.72    1.82
   4  11   6   11.62    0.94
   5   6   8    6.72    0.69
   5  13   4    7.50    0.78
   5  14   2    3.25    0.77
   6  11   6   76.99    1.24
   6  13   4   46.05    1.03
   7  14   2    2.44    0.64
   7  15  -2    0.89    0.48
   9  14   1   10.02    0.54
  10  11   4    2.15    0.40
  10  13   2    3.06    0.38
   0   7   6   26.55    0.69
   0   9   5   47.42    0.89
   0  10   3   16.32    0.68
   1   7   7   64.04    0.97
   1   9   6    2.02    0.59
   1  11   4   53.86    1.08
   2  10   6  138.73    1.59
   2  11   5    7.44    0.76
   3   5   8  117.00    1.21
   3   6   8   49.00    0.92
   4   5   8   94.56    1.17
   4   6   8   62.89    1.03
   5  12   5    7.43    0.81
   6  12   5    1.49    0.68
   6  14   2    7.39    0.68
   7   8   7   -0.51    0.60
   8  11   5    5.41    0.65
   8  13   3    7.35    0.67
   9   8   6    5.46    0.55
  10  12   3    0.97    0.38
  11  11   3    1.22    0.37
  11  12   2   10.07    0.45
   1   6   7   23.98    0.63
   1  10   5    5.41    0.63
   2   8   7   12.87    0.69
   2  12   3    1.18    0.67
   3  12   4   15.22    0.97
   3  13   2    3.53    0.72
   4   9   7   78.87    1.27
   5   9   7    2.47    0.65
   5  14   1    1.86    0.70
   7  10   6    2.29    0.61
   8   9   6    4.63    0.66
   8  12   4   27.77    0.82
   8  14   1    2.50    0.55
   9  10   5    1.53    0.58
   0   9   4   14.41    0.60
   0  10   2  193.92    1.54
   1   8   6  298.50    2.00
   1  11   3    3.99    0.62
   3  10   6   19.87    0.89
   3  11   5  116.96    1.55
   5  13   3    3.84    0.78
   5  14   0   35.11    1.04
   6   8   7   17.27    0.80
   6  13   3   12.22    0.90
   6  14   1    0.15    0.61
   7  11   5   18.67    0.91
   7  13   3   10.41    0.69
   7  14   1    2.19    0.70
   9   7   6    0.44    0.54
   9  13   2   48.28    0.94
   9  14   0   14.68    0.64
  11   9   4    0.78    0.36
  12   9   3    2.92    0.34
   1   9   5  114.05    1.35
   1  11   2   11.37    0.65
   2   7   7   16.41    0.67
   2   9   6    1.34    0.60
   2  10   5    0.44    0.73
   2  11   4   20.60    0.86
   2  12   2  152.38    1.64
   3  13  -1   57.36    1.15
   3  13   0    5.44    0.71
   4   8   7  141.35    1.57
   4  10   6    6.54    0.77
   4  11   5    6.79    0.92
   4  12   4  111.38    1.55
   4  13   2    7.75    0.91
   5   8   7  104.93    1.39
   5  10   6   10.61    0.81
   5  14  -1    5.43    0.78
   7   6   7   29.42    0.83
   7  12   4    2.69    0.69
   9  11   4    2.78    0.54
   9  12   3    8.86    0.68
  10   8   5    0.62    0.47
  10  10   4    8.28    0.60
  10  13   1    2.81    0.51
  10  14  -1    1.68    0.39
  11  13   0   -0.02    0.36
   0   9   3   18.78    0.59
   1   7   6   65.68    0.98
   1  11   0    1.49    0.53
   1  11   1   67.82    1.05
   2   5   7   97.28    1.08
   2  12   0   98.08    1.37
   2  12   1  119.81    1.44
   3   7   7   46.97    0.96
   3  12   3   55.91    1.18
   5  11   5    3.70    0.76
   6   7   7  129.47    1.44
   6  12   4    7.97    0.81
   6  14   0    4.02    0.65
   7   9   6    0.86    0.67
   7  14   0    4.13    0.76
   8   8   6    2.62    0.57
   8  10   5   29.24    0.93
   8  13   2   11.08    0.70
   8  14   0   23.56    0.75
   9   9   5   12.48    0.71
  11  14  -3    0.58    0.30
   1  10   3   59.39    1.08
   2  11   3   18.89    0.87
   3   6   7   69.88    1.05
   3   9   6   34.19    0.95
   3  11   4   12.94    0.93
   4   7   7   23.96    0.80
   4  13   1  185.20    1.88
   5   7   7   83.10    1.22
   6   9   6    2.02    0.77
   6  13   2    6.65    0.91
   6  14  -1    9.13    0.81
   7  13   2   13.38    0.82
   8  11   4    1.69    0.74
   8  12   3   22.20    0.92
   9  14  -1    5.68    0.54
  10   7   5    7.69    0.58
  10  11   3   36.43    0.80
  10  12   2    8.32    0.55
  10  14  -2    1.62    0.40
  11   8   4    3.92    0.47
  11  10   3    1.94    0.37
  11  10   3    0.49    0.23
  11  12   1    2.23    0.46
  12  10   2    2.73    0.41
  12  12   0    2.37    0.33
   1   8   5   68.70    0.99
   1   9   4   21.31    0.74
   3   4   7    1.01    0.40
   3   5   7   91.85    1.07
   3  10   5   -0.17    0.65
   3  12   2    4.71    0.74
   4   6   7   71.85    1.13
   4   9   6   94.41    1.38
   4  12   3    2.66    0.75
   5   9   6   88.24    1.36
   6  14  -2    4.53    0.67
   7  14  -1   14.31    0.76
   8  14  -1    4.60    0.61
   9  13   1   21.77    0.76
  10  14  -3    5.72    0.49
  11  11   2    1.28    0.43
  12   8   3    3.63    0.42
  12  11   1   15.67    0.52
   1  10   2   71.12    1.07
   2   7   6    0.57    0.45
   2   9   5  214.07    1.81
   2  10   4  114.22    1.40
   2  11   2    6.55    0.76
   3   8   6    8.91    0.65
   4   5   7   81.14    1.06
   4  10   5   27.19    0.98
   4  11   4   14.31    0.88
   4  13  -2   11.10    0.79
   4  13  -1   74.51    1.28
   5   5   7   46.95    0.88
   5  10   5   18.25    1.02
   5  12   3    4.43    0.81
   5  13   1    5.16    0.76
   6  10   5  191.80    1.93
   7  11   4  135.52    1.66
   7  12   3   51.05    1.17
   7  14  -3    0.15    0.64
   7  14  -2    3.43    0.65
   8   9   5    5.52    0.80
   8  13   1   37.45    1.04
   8  14  -2   59.32    1.12
   9   8   5   16.91    0.77
   9  10   4    3.21    0.60
  10   9   4   10.48    0.61
  10  13   0    9.90    0.58
  10  14  -5    1.64    0.40
  10  14  -4   15.19    0.58
  11   7   4    1.29    0.45
   1   7   5   18.56    0.58
   3  11   3  193.17    1.88
   4   8   6   18.96    0.87
   4  12   2  127.01    1.71
   5  11   4    7.29    0.82
   5  13   0   10.88    0.97
   6   8   6    2.90    0.68
   6  11   4    3.95    0.79
   7  13   1    3.57    0.77
   8   6   6   24.05    0.77
   8  14  -3    7.32    0.68
   9  11   3   15.99    0.78
   9  12   2   12.33    0.76
   9  14  -4    2.57    0.53
   9  14  -3    0.64    0.48
  12  13  -3    0.99    0.37
   1   8   4  185.81    1.51
   1   9   3  142.19    1.36
   2  10   3    0.64    0.63
   2  11   1    3.25    0.56
   3   9   5    5.53    0.66
   3  10   4   57.94    1.14
   3  12  -1   90.51    1.37
   3  12   0    8.22    0.72
   7   7   6    7.05    0.68
   7   9   5    3.93    0.85
   8  10   4    6.76    0.87
   8  12   2   44.09    1.18
   9  13   0    8.29    0.68
  10  10   3    1.91    0.58
  10  12   1    0.94    0.56
  11   9   3    5.71    0.53
  11  12   0   25.09    0.77
  12   9   2    3.35    0.48
  12  12  -1    2.77    0.47
  13   9   1    4.40    0.42
   2   9   4    2.07    0.53
   2  11  -1   75.31    1.12
   2  11   0    3.81    0.56
   4   7   6   51.30    1.06
   4   9   5    4.81    0.70
   4  11   3    7.63    0.80
   4  12   1    4.16    0.88
   5  12   2   13.80    0.91
   5  13  -2   -0.64    0.80
   5  13  -1   24.71    0.94
   6   7   6    5.85    0.79
   6   9   5   20.37    1.00
   7   6   6  262.98    2.02
   7  13   0   10.26    0.94
   8  11   3   18.68    0.91
   9   7   5   15.44    0.70
   9   9   4   28.16    0.98
  10   8   4    9.04    0.71
  10  11   2    8.46    0.68
  10  13  -1    6.59    0.57
  11  10   2   23.48    0.79
  11  13  -2   10.56    0.54
  12  13  -4    2.46    0.39
  13  11  -1    3.24    0.36
   1   9   2   50.32    0.84
   3   6   6   35.34    0.77
   4  10   4   40.84    1.06
   5   7   6   31.48    0.89
   5   9   5   84.67    1.36
   5  11   3   10.48    0.98
   7   5   6   37.98    0.91
   7  10   4   22.18    0.97
   9  12   1    2.59    0.80
   9  13  -1    3.00    0.74
  11  11   1   11.87    0.64
  12  11   0    5.97    0.51
  12  13  -5    3.69    0.40
  13  12  -3    2.57    0.34
   2   7   5  126.07    1.25
   2  10   2    7.53    0.60
   3   5   6   41.64    0.80
   3   8   5    0.35    0.52
   3  10   3   17.59    0.78
   4   6   6   46.35    0.94
   4  12   0  259.70    2.19
   5  10   4    4.54    0.78
   5  12   1    0.91    0.74
   6   6   6  263.97    1.99
   6  10   4  117.00    1.61
   6  11   3    1.02    0.79
   7  13  -1    7.51    0.94
   8  13  -1   27.33    1.03
   9  10   3    0.22    0.69
   9  11   2    3.38    0.84
  10  13  -2    2.23    0.65
  11  13  -3   12.32    0.59
  14   8   0    1.16    0.35
   2   8   4   48.36    0.89
   2   9   3   67.26    1.04
   3  11   1  179.10    1.75
   4   8   5   46.61    1.01
   4  12  -1   19.72    0.94
   5   6   6    5.51    0.58
   6   5   6    1.94    0.63
   6   8   5   22.61    0.97
   6  12   1    1.66    0.80
   8   7   5   61.96    1.15
  10   7   4   17.09    0.74
  10   9   3    2.71    0.65
  10  12   0   36.01    0.98
  11  12  -1    2.13    0.56
  11  13  -4    0.96    0.53
  12  12  -2    2.36    0.47
  13   8   1    2.14    0.47
   2  10   1    8.37    0.56
   3   7   5  423.76    2.34
   3  11   0   12.94    0.78
   4   4   6   53.82    0.85
   4   5   6    4.79    0.48
   4   9   4   45.23    1.11
   4  10   3   27.35    0.94
   4  12  -2  471.03    2.79
   5   8   5   42.85    1.02
   5  11   2   16.70    1.02
   5  12   0   27.49    1.11
   7   9   4   12.45    1.00
   7  13  -2   36.49    1.05
   8  13  -2    6.76    0.89
   9  13  -2    3.02    0.68
  10  10   2   37.93    1.02
  10  11   1   85.27    1.34
  10  13  -3   15.72    0.74
  11   9   2    3.65    0.70
  11  13  -6    2.50    0.46
  13  11  -2    0.73    0.47
  13  12  -4    4.94    0.36
  14  10  -2    7.62    0.43
   2  10   0  253.04    1.82
   3  10   2    5.80    0.62
   3  11  -2    9.83    0.71
   3  11  -1  268.49    2.06
   5   9   4    1.27    0.70
   5  10   3   81.50    1.45
   6   9   4   48.30    1.16
   6  11   2    1.60    0.80
   7   7   5   14.13    0.79
   7  10   3  156.31    1.91
   7  11   2   61.64    1.33
   7  13  -3    5.74    0.73
   8   6   5   17.05    0.78
   8  13  -3   83.89    1.41
   9  12   0    6.10    0.81
   9  13  -3   47.44    1.13
  10   6   4    6.81    0.70
  10  13  -4    1.44    0.66
  11  10   1   18.42    0.90
  11  11   0   11.76    0.73
  12   9   1   14.44    0.76
  12  11  -1    6.68    0.59
  12  12  -3    2.63    0.54
  13   9   0    4.56    0.55
  13  10  -1    2.77    0.53
  14  11  -4    2.64    0.37
   2   7   4   45.22    0.80
   2   9   2   51.73    0.91
   3   8   4  119.39    1.35
   3   9   3   44.94    0.95
   4   7   5   90.61    1.22
   5   7   5   26.34    0.95
   6  12   0    6.71    0.87
   8   5   5   79.71    1.22
   8   8   4   24.88    1.02
   8  12   0    8.11    0.90
   8  13  -5   20.10    0.88
   9  11   1   51.98    1.33
   9  13  -5   31.21    0.95
   9  13  -4   20.82    0.90
  10   8   3    3.71    0.82
  10  12  -1    4.24    0.71
  10  13  -6    1.31    0.56
  10  13  -5   29.37    0.89
  11  12  -2   11.30    0.71
  12   7   2    1.94    0.58
  12  10   0   14.40    0.71
  13  12  -5    3.46    0.35
  14   7   0    4.23    0.47
   2   8   3   52.34    0.87
   3  10   1   42.70    1.01
   4  10   2   71.68    1.32
   4  11   0   18.22    0.97
   5  11   1   11.66    0.86
   5  12  -3    2.05    0.81
   5  12  -2   61.45    1.23
   6  12  -1    2.22    0.91
   9  10   2   81.00    1.43
   9  12  -1   15.63    1.03
  11   6   3    4.08    0.63
  13   7   1    4.03    0.50
  13  12  -7    2.63    0.39
  13  12  -6    4.17    0.41
   2   9   1  293.08    1.91
   4   6   5   32.34    0.78
   4   8   4   90.68    1.26
   4   9   3   68.47    1.19
   5   8   4    7.28    0.79
   6   6   5    7.75    0.78
   6  11   1    2.78    0.81
   7   8   4   32.69    1.01
   7  11   1    5.43    0.99
   7  12  -1   45.09    1.29
   8   9   3  114.61    1.63
   8  10   2   21.36    1.13
  10   9   2   23.90    0.96
  10  11   0    7.65    0.83
  10  12  -2   28.81    1.07
  11   8   2    4.52    0.78
  12  12  -4    3.06    0.53
  13  11  -3    3.02    0.50
  14  10  -3    0.83    0.40
  14  11  -5   18.22    0.56
   3   7   4   60.21    0.95
   3   9   2    1.15    0.58
   3  10   0  236.03    1.92
   4  11  -1   53.83    1.11
   5   6   5   48.06    0.94
   5   9   3   13.63    0.91
   5  10   2   68.62    1.31
   6   8   4   49.23    1.12
   6  10   2   96.15    1.60
   6  12  -2    4.93    0.83
   7   5   5  163.09    1.59
   7   9   3   70.72    1.37
   8   7   4   16.13    0.87
   9   6   4   23.46    0.85
   9   8   3    1.27    0.85
  10  10   1    8.53    0.85
  11   5   3    3.51    0.60
  11  11  -1   16.03    0.83
  12   6   2   10.32    0.70
  12   8   1    2.38    0.72
  12  11  -2   11.85    0.72
  12  12  -5    0.50    0.59
  13   8   0    1.98    0.63
  14   6   0    1.40    0.46
  14   8  -1    1.51    0.44
  14   9  -2    3.07    0.51
   4   5   5  269.89    1.79
   4  10   1    2.14    0.61
   4  11  -3   11.16    0.80
   5  11   0    1.99    0.70
   6   5   5   37.97    0.94
   6  12  -4   19.05    0.99
   6  12  -3   25.47    0.99
   7   4   5    7.03    0.65
   7  12  -2   21.14    1.00
   9  11   0    6.27    0.92
   9  12  -2   29.53    1.07
  11   9   1   38.43    1.06
  11  10   0   31.63    1.02
  11  12  -4    8.38    0.77
  12   9   0    1.56    0.76
  12  10  -1    1.61    0.73
  13   6   1    2.80    0.52
  13   9  -1   21.68    0.81
  13  10  -2    9.61    0.63
   3  10  -1   16.55    0.68
   4   7   4   12.39    0.63
   5   5   5   12.91    0.60
   6  11   0    4.53    0.82
   7   7   4   10.25    0.79
   7  11   0   64.22    1.48
   7  12  -3    1.40    0.91
   8   8   3    1.27    0.85
   8  11   0   59.01    1.38
   9   5   4    2.70    0.62
   9   9   2   24.96    1.04
  10  11  -1    3.29    0.84
  10  12  -3   10.38    0.82
  11   7   2   16.20    0.92
  12   5   2    0.45    0.58
  12  12  -7    8.88    0.56
  14  10  -4    0.40    0.53
  14  11  -7    5.65    0.47
  15   7  -2    3.16    0.37
  15   7  -2    0.43    0.21
  15   9  -4    1.86    0.41
   3   9   1   40.94    0.88
   3  10  -2  182.92    1.60
   4   8   3    2.35    0.55
   4   9   2   65.18    1.13
   5   7   4    4.13    0.58
   5  10   1   24.55    0.94
   5  11  -1  146.77    1.74
   6   7   4   23.15    0.86
   7  12  -5    5.70    0.87
   7  12  -4   12.94    0.98
   8   6   4    8.75    0.72
   8   9   2   25.56    1.17
   8  10   1   45.13    1.37
   9  12  -3   22.12    0.99
  10   6   3   56.03    1.14
  10  12  -4   49.78    1.25
  11  11  -2   31.61    1.05
  11  12  -5    1.88    0.65
  12  11  -3   12.62    0.78
  13   5   1    4.22    0.60
  14   5   0    0.51    0.47
  14   7  -1    4.69    0.59
  15   8  -3    7.44    0.48
   3   7   3  242.42    1.77
   3   8   2   10.62    0.62
   4  10   0   35.56    0.95
   5   8   3   11.16    0.72
   5  11  -2  196.63    1.98
   6  11  -1    2.44    0.76
   7   8   3   58.33    1.25
   7  10   1   28.90    1.11
  10  10   0   10.40    0.95
  10  12  -5    4.10    0.83
  11  12  -7    0.12    0.55
  11  12  -6   36.16    0.93
  12   7   1   10.32    0.72
  13   7   0    2.73    0.69
  13  10  -3    3.01    0.72
  14   9  -3    3.06    0.60
   4   6   4  139.18    1.37
   5   6   4  161.63    1.59
   5  11  -4   48.17    1.17
   5  11  -3  175.69    1.86
   6   6   4   12.97    0.81
   6   9   2   10.56    0.83
   7   9   2    5.13    0.83
   7  11  -1    6.97    0.90
   8   5   4   23.04    0.84
   8  11  -1   16.61    1.02
   9   8   2   12.04    1.05
   9  12  -6    4.34    0.85
   9  12  -5   16.62    0.91
  10   5   3   47.36    1.15
  10  11  -2    1.51    0.88
  10  12  -7   10.04    0.71
  10  12  -6   33.01    0.99
  11   8   1   18.62    0.92
  11   9   0   19.88    1.11
  11  10  -1    8.16    0.88
  11  11  -3    2.74    0.90
  12   8   0   54.94    1.26
  12  10  -2    3.08    0.72
  12  11  -4    0.48    0.65
  13  11  -6   17.98    0.77
  14   8  -2    7.47    0.61
  14  10  -5    1.21    0.56
  15   6  -2    0.77    0.48
  15   9  -5    3.70    0.50
   4   7   3   65.89    1.08
   4   9   1    9.75    0.65
   4  10  -1   17.38    0.75
   5  10   0   23.43    0.89
   6  11  -2   49.26    1.22
   8   7   3    4.00    0.76
   9   6   3   62.71    1.34
   9   9   1   14.54    1.01
   9  10   0   40.03    1.25
  10   7   2    7.37    0.96
  12   9  -1   20.57    0.92
  13   8  -1    8.82    0.73
  13   9  -2    7.43    0.73
  13  11  -7    4.61    0.63
   4   8   2   69.48    1.11
   4  10  -2  108.00    1.39
   6  10   0   62.43    1.32
   6  11  -3   88.45    1.54
   7   5   4   -1.02    0.56
   7   7   3   26.28    0.94
   7  10   0   11.99    1.08
   7  11  -2   44.31    1.26
   8   8   2   29.63    1.21
   8  10   0  112.17    1.75
   8  11  -2    5.57    0.90
  10   4   3    0.88    0.67
  10  11  -3   14.91    1.15
  12  11  -5    1.24    0.66
  13   6   0   34.34    1.02
  13  10  -4    2.94    0.78
  13  11  -8    2.31    0.40
  14   6  -1    1.64    0.55
  14  10  -6    2.61    0.59
  15   7  -3    3.64    0.59
  15   8  -4   12.68    0.62
  16   8  -6    0.29    0.30
  16   8  -6    0.34    0.18
   3   9  -1   41.86    0.84
   4  10  -3   67.88    1.14
   5   5   4   13.41    0.59
   5   7   3   76.67    1.18
   5   8   2   47.52    1.10
   5  10  -1   12.48    0.81
   6   7   3   65.90    1.19
   6  11  -5    8.70    0.90
   6  11  -4    2.19    0.85
   7   8   2   69.96    1.42
   7   9   1   97.33    1.65
   8   9   1   10.50    0.94
  10   8   1    6.89    0.88
  11  10  -2   25.77    1.12
  11  11  -4   20.38    1.00
  12  10  -3    4.25    0.81
  12  11  -6    8.22    0.86
  15   5  -2    1.10    0.53
  15   9  -6    3.24    0.55
  16   6  -4    4.70    0.46
  16   7  -5    7.76    0.55
   4   9   0   61.12    1.09
   6   8   2   78.64    1.33
   6   9   1   27.37    0.99
   7   4   4  174.89    1.62
   7  11  -3    3.02    0.81
   8   6   3   44.94    1.09
   9   5   3    3.09    0.67
   9   7   2   14.74    0.94
   9  10  -1   66.92    1.51
  10   6   2    6.99    0.94
  10  11  -4    1.46    0.99
  11   9  -1   13.24    1.14
  11  11  -5    4.82    0.92
  12   5   1    4.37    0.78
  12   7   0   13.58    0.98
  12  11  -9    4.14    0.56
  12  11  -8    5.22    0.74
  13   7  -1    0.55    0.79
  13   9  -3    5.57    0.85
  14   7  -2    4.89    0.68
  14   8  -3    1.28    0.64
  14  10 -10    1.92    0.41
  14  10  -7    3.00    0.61
  16   8  -7   -0.34    0.40
   5  10  -2  161.36    1.78
   6   4   4  137.54    1.39
   6  10  -1   32.06    1.05
   7   6   3    6.49    0.84
   7  10  -1    0.19    0.82
   7  11  -5   25.76    1.10
   7  11  -4   26.07    1.02
   9   8   1   42.07    1.35
   9   9   0   57.69    1.43
  11   4   2    5.97    0.66
  12   8  -1   16.44    1.00
  12   9  -2    1.94    0.82
  13   5   0   29.56    1.00
  13   8  -2    5.92    0.80
  13  10  -5   18.69    0.89
  14   5  -1   13.95    0.73
  14  10  -9    4.15    0.51
  14  10  -8    7.58    0.65
  15   9  -7   10.73    0.64
   4   7   2    4.22    0.49
   4   8   1  128.20    1.42
   4   9  -1  251.04    2.02
   5   6   3   18.84    0.70
   5   9   0    0.06    0.59
   5  10  -3   34.76    1.04
   8   5   3   21.57    0.93
   8   7   2    5.11    0.79
   8  11  -4   39.82    1.27
  10   7   1    3.86    0.95
  10  11  -5   48.45    1.33
  11  10  -3    8.69    1.00
  11  11  -8   16.28    0.93
  11  11  -7   17.45    1.05
  11  11  -6    2.56    0.80
  12  10  -4    4.88    0.88
  14   9  -5    6.48    0.73
  15   6  -3   18.88    0.78
  15   7  -4    2.27    0.65
  15   8  -5    0.71    0.54
   5   7   2   25.01    0.88
   5   8   1   41.87    1.05
   5  10  -4  101.05    1.48
   6   3   4    6.53    0.47
   6   9   0   10.70    0.81
   6  10  -2  369.72    2.76
   7   7   2   13.70    0.92
   8   8   1    2.37    0.82
   8   9   0    3.08    0.88
   8  11  -6    1.52    0.79
   8  11  -5   13.91    0.96
   9   6   2    6.29    0.92
   9  10  -2   50.03    1.42
  10   5   2   54.92    1.21
  10   8   0   14.56    1.21
  10   9  -1   43.04    1.34
  10  11  -7   30.77    1.21
  13   4   0   15.55    0.83
  13   9  -4    4.07    0.93
  13  10  -6    1.31    0.69
  14   4  -1    2.79    0.66
  15   9 -10    2.55    0.45
  15   9  -9    1.77    0.51
  16   6  -5    0.73    0.54
  16   7  -6    0.65    0.48
   6   7   2    5.29    0.65
   6   8   1    7.77    0.77
   7   5   3   59.46    1.15
   7   8   1    5.81    0.80
   7  10  -2   27.22    1.12
   8  10  -2    5.19    0.93
  11   7   0    1.86    0.84
  11  10  -4    9.41    1.16
  12   6   0    2.01    0.80
  12   9  -3    6.19    0.96
  12  10  -5   27.51    1.12
  13   6  -1    3.25    0.78
  13  10  -7    1.63    0.66
  14   7  -3   23.74    1.03
  14   8  -4    2.28    0.72
  14   9  -6   21.49    0.95
  15   8  -6    2.23    0.71
  16   8  -9    1.94    0.40
   4   8   0  129.78    1.43
   6   5   3    8.15    0.65
   8   4   3   17.55    0.79
   8   6   2   40.03    1.19
   9   7   1  111.84    1.73
   9   9  -1  214.89    2.39
  10   4   2   23.42    1.00
  11   5   1   11.86    1.00
  12   7  -1   21.10    1.10
  12   8  -2   70.44    1.65
  13   7  -2    3.49    0.96
  13   8  -3    8.30    0.93
  13  10  -9    5.68    0.65
  13  10  -8   29.26    0.99
  15   5  -3    2.11    0.68
  16   4  -4   11.18    0.68
   4   9  -3  231.32    1.87
   6   9  -1    7.02    0.76
   6  10  -4  352.31    2.67
   7   9  -1   48.72    1.38
   7  10  -3    1.73    0.82
   8   9  -1   40.37    1.29
   8  10  -3   99.00    1.76
   9   5   2   55.05    1.31
   9   8   0   14.33    1.04
  10   6   1    7.74    0.89
  10   9  -2   12.63    1.23
  11  10  -5   -0.49    1.08
  12  10 -10   20.86    0.88
  12  10  -6    4.93    0.88
  13   9  -5   18.47    1.15
  15   6  -4   10.73    0.85
  15   7  -5   12.03    0.86
  16   7  -7    3.35    0.55
  17   4  -6    2.08    0.48
  17   5  -7    1.22    0.46
   5   6   2    2.88    0.59
   5   8   0  116.31    1.46
   6  10  -5   12.89    0.84
   7   4   3  104.83    1.33
   7   6   2  195.57    1.93
   7  10  -4    4.25    1.00
   8   3   3  208.26    1.82
   8   7   1  217.41    2.22
   8   8   0   52.78    1.35
  10   3   2   73.37    1.33
  10   7   0    6.20    1.08
  10   8  -1   49.17    1.53
  12   9  -4    6.50    1.03
  12  10  -9    6.22    0.87
  12  10  -7    2.39    0.85
  13   5  -1    4.64    0.93
  14   5  -2   29.34    1.00
  14   8  -5    0.13    0.77
  14   9 -11    0.78    0.50
  15   8  -7    0.22    0.66
  16   5  -5   33.73    0.97
  16   6  -6   21.21    0.83
   6   4   3   96.93    1.22
   6   6   2  168.09    1.70
   6   7   1    4.31    0.77
   6   8   0   97.34    1.47
   7   7   1   17.52    0.87
   7   8   0   33.15    1.09
   7  10  -5    2.04    0.90
   9   9  -2   48.19    1.44
  10  10  -5    0.81    1.11
  11   4   1   28.90    1.04
  11   6   0   14.63    0.96
  11  10  -6   54.78    1.45
  12  10  -8   25.72    1.03
  13   8  -4    1.32    1.00
  13   9  -6   16.27    1.13
  14   6  -3   14.85    1.02
  14   7  -4   10.74    1.05
  14   9 -10    3.30    0.65
  14   9  -9    2.01    0.75
  14   9  -8    6.41    0.70
  15   4  -3   14.46    0.90
  16   3  -4   14.38    0.76
  16   7  -8    8.09    0.62
   5   9  -3  128.53    1.58
   6   9  -2    0.00    0.71
   7   3   3   61.78    1.07
   7   9  -2   82.01    1.59
   8   5   2   48.75    1.14
   8   9  -2   11.15    1.01
   8  10  -5   19.20    1.22
   9   4   2    3.75    0.70
   9   6   1   32.45    1.09
   9   8  -1   14.54    1.19
   9  10  -5   93.70    1.75
  10   5   1    8.11    0.86
  10   9  -3   24.68    1.38
  11   7  -1   23.75    1.18
  11   8  -2   20.74    1.19
  11  10  -9    2.30    0.90
  11  10  -7    6.51    0.99
  12   4   0   29.34    1.16
  13   6  -2   82.02    1.58
  13   7  -3   82.06    1.74
  14   4  -2   16.58    0.97
  15   7  -6    4.29    0.83
  15   8  -8    8.52    0.71
  17   3  -6   21.49    0.71
   5   8  -1   70.95    1.20
   5   9  -4    0.83    0.70
   7   5   2   23.82    0.93
   8  10  -7   15.60    1.11
   8  10  -6   24.89    1.25
   9   7   0    6.38    0.91
   9  10  -6   54.95    1.56
  10  10  -9   14.84    0.92
  12   9  -5   15.69    1.17
  13   4  -1   32.14    1.08
  13   9 -11   14.79    0.83
  13   9  -7   10.43    0.97
  14   8  -6    7.13    0.88
  15   3  -3   52.74    1.21
  15   5  -4    9.17    0.86
  15   6  -5    4.35    0.91
  15   8 -11    2.39    0.49
  15   8 -10    3.88    0.65
  15   8  -9    8.94    0.70
  16   2  -4   12.37    0.71
  16   4  -5    5.61    0.73
  16   6  -7    1.98    0.70
  16   7  -9    8.02    0.61
  17   5  -8    4.76    0.51
   6   5   2   38.36    0.96
   6   8  -1    0.55    0.74
   6   9  -3   58.40    1.26
   8   6   1    1.40    0.71
   8   7   0    4.99    0.95
   8   8  -1   48.53    1.33
   9   3   2   16.80    0.88
   9   9  -3   49.19    1.46
   9  10  -7   26.82    1.16
  10   6   0   42.96    1.28
  10   8  -2   63.75    1.61
  11   5   0   -0.14    0.81
  13   8  -5   15.98    1.27
  13   9  -8    0.55    0.98
  16   5  -6    5.07    0.78
  16   7 -11    4.97    0.51
  16   7 -10    3.91    0.47
  17   2  -6    2.12    0.53
   5   7   0    9.97    0.62
   7   6   1    2.92    0.65
   7   7   0   -0.34    0.79
   7   8  -1    4.78    0.76
   7   9  -3   77.47    1.50
   8   4   2   45.06    1.04
   8   9  -3   16.95    1.06
   9   5   1   47.72    1.23
  10   4   1    1.78    0.72
  10   7  -1   41.61    1.36
  10   9  -4    7.87    1.11
  11   8  -3    1.72    1.02
  12   3   0    1.99    0.72
  12   5  -1   30.57    1.25
  12   9  -6    3.12    1.02
  13   9 -10   11.48    0.84
  13   9  -9   45.43    1.25
  14   3  -2   10.13    0.94
  14   5  -3   33.16    1.18
  14   6  -4   13.45    1.17
  14   7  -5   14.23    1.05
  14   8  -7    1.40    0.85
  15   2  -3   66.98    1.32
  15   7  -7   10.06    0.87
  17   5  -9    0.85    0.51
   5   8  -2   71.01    1.20
   6   7   0   85.64    1.34
   6   9  -4   12.81    0.84
   9   8  -2    5.07    1.01
   9   9  -4  140.76    2.20
  11   6  -1   16.96    1.15
  12   6  -2   35.41    1.50
  12   9 -11   20.91    0.94
  12   9  -7    3.98    1.03
  13   6  -3   14.05    1.29
  13   7  -4    9.18    1.06
  14   8 -12    0.64    0.57
  14   8  -8    9.89    1.04
  15   4  -4   23.25    1.13
  16   3  -5    1.85    0.77
  16   6  -8    2.05    0.70
  17   3  -7    4.40    0.62
  17   4  -8   21.40    0.84
   6   8  -2   19.01    0.96
   6   9  -5  112.55    1.60
   7   4   2   36.92    0.91
   7   9  -4    1.99    0.80
   8   3   2   19.72    0.85
   8   5   1   76.73    1.43
   8   8  -2    8.84    1.08
   8   9  -4    7.01    0.99
   9   6   0   26.16    1.09
   9   7  -1   34.35    1.26
  10   8  -3   11.87    1.30
  10   9  -5   22.37    1.27
  11   4   0    9.48    0.89
  12   9 -10    1.06    0.96
  12   9  -9   13.58    1.16
  12   9  -8    1.80    0.98
  13   8  -6   23.38    1.25
  14   2  -2   17.01    0.98
  14   7  -6   24.75    1.33
  14   8 -11   15.67    0.90
  15   5  -5   33.48    1.26
  15   7 -13    0.46    0.36
  15   7 -13    0.30    0.20
  15   7  -8   27.16    1.07
  16   5  -7    6.39    0.87
  17   5 -10    0.68    0.47
   7   9  -5  105.95    1.79
   9   4   1   14.31    0.97
  10   3   1    5.87    0.73
  10   5   0   34.24    1.20
  11   8  -4   11.17    1.19
  12   4  -1    9.66    1.12
  14   8 -10    9.60    0.86
  15   7 -12    2.51    0.60
  15   7  -9    8.40    0.92
  16   4  -6    3.23    0.76
  16   6  -9    0.88    0.65
  17   5 -11    0.54    0.34
  17   5 -11   -0.02    0.21
   7   5   1   11.58    0.74
   7   9  -7    1.85    0.91
   7   9  -6    4.32    0.96
   8   7  -1   29.61    1.13
   8   9  -5    9.12    0.97
  10   7  -2  104.48    1.92
  10   9  -6   97.51    1.88
  11   9 -10   21.55    1.07
  13   7  -5    2.01    1.11
  13   8  -7    1.54    1.04
  14   5  -4    5.75    1.01
  14   6  -5    4.98    1.06
  15   3  -4   26.16    1.19
  15   7 -11   19.80    0.93
  15   7 -10    9.67    0.91
  16   6 -12    3.47    0.58
  16   6 -11    2.44    0.64
  16   6 -10    4.46    0.66
  17   2  -7    0.18    0.59
   5   8  -4  130.13    1.60
   6   7  -1   55.96    1.15
   6   8  -3    4.75    0.70
   7   6   0   15.49    0.83
   7   7  -1   65.98    1.33
   8   2   2   13.31    0.66
   8   8  -3   66.88    1.60
   9   9  -6   26.83    1.25
  10   8  -4  125.08    2.23
  10   9  -9   34.75    1.47
  10   9  -8   76.33    1.79
  10   9  -7  112.82    2.00
  11   3   0   81.40    1.54
  11   6  -2   63.40    1.65
  11   7  -3   15.55    1.22
  12   5  -2    3.83    0.97
  12   6  -3   15.22    1.37
  12   7  -4   11.52    1.21
  13   8  -8    1.34    1.01
  14   7  -7    7.10    1.05
  16   1  -5    7.56    0.83
  16   5  -8    1.25    0.86
   6   6   0    7.72    0.64
   8   4   1    2.34    0.62
   8   9  -7  290.64    2.75
   9   5   0    8.49    0.90
   9   7  -2    3.58    0.97
   9   9  -8   27.81    1.24
   9   9  -7    3.02    0.92
  10   4   0   13.16    0.95
  11   8  -5    3.56    1.13
  12   3  -1    1.48    0.95
  12   8 -12   93.69    1.61
  13   8 -11   -0.56    0.77
  13   8  -9   18.74    1.17
  14   3  -3   73.87    1.57
  14   7 -13   11.55    0.76
  15   2  -4    5.19    0.99
  15   4  -5    1.33    0.85
  15   5  -6    0.85    0.91
  16   3  -6    6.24    0.89
  16   4  -7    2.67    0.89
  17   1  -7    1.63    0.62
  17   4 -10    1.60    0.56
   5   8  -5   60.50    1.13
   6   8  -4   93.24    1.56
   8   7  -2    3.67    0.99
   9   8  -4    8.38    1.07
  10   7  -3   21.10    1.41
  13   7  -6    8.07    1.23
  14   6  -6    1.64    1.09
  14   7  -8    3.02    1.03
  15   6  -8   24.95    1.18
  16   5  -9    6.51    0.95
  17   4 -12    1.44    0.50
  17   4 -11    1.54    0.58
   6   7  -2   38.70    1.13
   7   4   1   18.88    0.77
   7   7  -2    0.31    0.84
   8   6  -1    8.10    0.96
   8   8  -4    3.55    0.88
  10   5  -1   68.87    1.56
  10   6  -2    4.78    1.02
  10   8  -5   67.81    1.73
  11   4  -1   19.93    1.12
  11   7  -4    7.53    1.19
  11   8  -6    4.63    1.15
  12   7  -5   27.45    1.43
  14   2  -3   24.61    1.26
  14   5  -5  119.85    2.08
  14   7 -12    8.24    0.82
  14   7  -9    4.86    1.04
  15   1  -4   33.05    1.24
  15   6 -13   -0.18    0.60
  15   6  -9    0.48    1.03
  16   2  -6    4.27    0.94
  17   2  -8    2.70    0.56
  17   2  -8    1.34    0.36
  17   3  -9    0.83    0.61
   6   8  -5   27.26    1.03
   9   4   0    2.60    0.92
   9   7  -3  189.28    2.48
   9   8  -5   34.84    1.48
  10   3   0    0.06    0.94
  11   6  -3   33.49    1.45
  11   8  -7   61.01    1.89
  12   4  -2    3.88    1.02
  12   5  -3    5.54    1.34
  12   6  -4   49.41    1.65
  12   8 -10   18.07    1.21
  12   8  -9    8.80    1.12
  13   2  -2   94.41    1.74
  13   7 -13   10.50    0.91
  13   7  -7    4.21    1.13
  14   6  -7    5.18    1.33
  14   7 -11   16.18    1.06
  14   7 -10   30.76    1.24
  15   3  -5    3.78    0.97
  15   4  -6   24.44    1.39
  15   5  -7    9.12    1.10
  15   6 -10    4.49    1.04
  16   3  -7   18.23    1.16
  16   4  -8    3.55    0.89
   6   8  -6   12.77    0.90
   7   5   0  101.09    1.47
   7   8  -5   21.69    1.01
   8   3   1    7.82    0.67
  10   8  -6  135.25    2.27
  11   8 -11    9.22    1.01
  12   7  -6    2.92    1.19
  13   7  -8    2.51    1.37
  14   1  -3   11.87    1.13
  15   6 -12    7.48    0.71
  15   6 -11    1.22    0.77
  16   1  -6    0.29    0.95
  16   5 -12    2.53    0.55
  17   1  -8    2.66    0.65
  17   3 -10    0.96    0.62
   7   8  -6  117.00    1.84
   8   7  -3  137.40    1.98
   9   5  -1   49.48    1.32
   9   6  -2  131.67    2.00
   9   8  -6    9.20    1.11
  10   8  -7   30.95    1.59
  11   3  -1    7.35    0.93
  11   7  -5   42.59    1.59
  11   8  -9   80.30    1.90
  13   1  -2   29.61    1.26
  13   7 -12    4.73    1.06
  14   3  -4   28.52    1.37
  14   4  -5   17.23    1.47
  14   5  -6   26.26    1.48
  15   2  -5    3.59    1.11
  16   4  -9    6.91    1.07
  17   0  -8    1.19    0.70
  17   2  -9    0.55    0.68
  17   3 -13    0.63    0.48
  17   3 -11    2.59    0.62
   6   7  -3    7.17    0.71
   7   7  -3    9.86    0.84
   7   8  -7  110.25    1.83
   9   8  -7    7.50    1.27
  10   2   0   35.03    1.20
  10   4  -1    8.22    0.97
  10   6  -3   15.76    1.21
  10   8 -10  235.27    2.74
  10   8  -9   56.14    1.77
  10   8  -8   74.82    1.82
  12   3  -2    1.50    0.94
  12   6  -5    8.99    1.46
  12   7  -7    5.99    1.52
  13   3  -3   47.72    1.56
  13   7 -11    2.97    1.14
  13   7 -10    1.85    1.21
  13   7  -9    4.84    1.12
  15   5 -14    2.83    0.65
  16   0  -6    3.93    0.99
  16   2  -7    1.18    1.08
  16   3  -8    6.82    1.10
  16   4 -14    4.97    0.63
  17  -1  -8    1.08    0.70
  17   3 -12    0.51    0.45
  17   3 -12    0.27    0.29
   8   5  -1  225.18    2.30
   8   6  -2   66.24    1.45
   8   8  -8   70.23    1.67
   9   3   0   12.28    0.82
   9   8  -9   88.41    1.92
   9   8  -8   76.97    1.76
  10   5  -2   44.70    1.42
  10   7  -5   16.64    1.28
  11   4  -2   19.87    1.19
  11   5  -3   26.59    1.51
  11   6  -4  118.57    2.20
  12   4  -3   98.21    2.11
  12   5  -4    0.34    1.33
  13   4  -4   30.70    1.45
  13   5  -5   22.29    1.42
  14   5 -15    6.74    0.69
  14   6 -13    3.02    0.77
  14   6  -9    1.08    1.15
  15   3  -6   13.62    1.18
  15   5  -9   49.10    1.57
  16  -1  -6    0.80    0.92
  16   4 -10    5.99    0.94
  17   1  -9    2.74    0.82
  17   2 -10    0.75    0.68
   6   7  -4   23.01    1.01
   7   6  -2   75.48    1.40
   8   7  -4  104.71    1.82
  11   2  -1   11.92    0.97
  12   7 -12   17.54    1.14
  12   7  -8    9.23    1.28
  14   6 -12    4.33    0.98
  14   6 -11    8.84    1.20
  14   6 -10    0.63    1.10
  15   1  -5   16.01    1.14
  15   5 -13   32.35    1.19
  16   4 -12    2.00    0.79
  16   4 -11    1.45    0.83
  17   2 -11    3.56    0.79
   7   5  -1   86.95    1.41
   9   4  -1   52.67    1.34
   9   5  -2    7.44    1.02
   9   6  -3    6.86    1.02
   9   7  -5   18.56    1.19
  10   1   0    6.86    0.75
  10   3  -1    6.37    1.05
  10   7  -6   46.92    1.76
  11   7 -12   19.38    1.27
  11   7  -7   31.56    1.61
  12   6  -6   17.08    1.46
  12   7 -11   13.98    1.21
  15   4 -15    5.12    0.64
  15   4  -8    4.07    1.21
  15   5 -12   10.36    0.96
  15   5 -11    4.85    0.99
  16   1  -7    3.78    0.95
  16   2  -8   11.43    1.25
  16   3  -9    4.70    1.00
  17   2 -13   -0.30    0.55
  17   2 -12    5.36    0.72
   6   7  -5   51.53    1.24
   8   3   0   -0.53    0.65
   8   6  -3   50.60    1.44
   8   7  -5    4.05    1.10
   9   2   0    8.27    0.88
  10   6  -4  216.98    2.74
  11   3  -2   50.31    1.59
  11   7  -8   22.49    1.57
  13   3  -4   19.19    1.46
  13   5  -6   20.91    1.49
  13   6 -13   37.53    1.39
  14   5  -8    1.38    1.30
  15   2  -6   13.37    1.25
  17  -1  -9    2.83    0.77
  17   1 -10    1.63    0.73
   7   7  -5   84.71    1.56
   9   7  -6   36.31    1.56
  10   5  -3  102.98    1.95
  10   7  -7   21.70    1.51
  11   7 -10   62.55    1.94
  11   7  -9  103.16    2.30
  12   1  -2    1.75    1.06
  12   3  -3   11.99    1.21
  12   4  -4   60.78    1.94
  12   5  -5    3.60    1.27
  12   6  -7    3.82    1.53
  13   1  -3   55.12    1.66
  13   4  -5   21.27    1.53
  13   6 -12    8.37    1.27
  14   5 -14   36.08    1.16
  15  -1  -5   19.49    1.25
  16   3 -10    5.57    1.04
  17  -2  -9    0.49    0.67
  17   1 -11    0.84    0.76
   6   7  -6   10.23    0.77
   7   6  -3   10.16    0.81
   8   4  -1   57.81    1.29
   8   5  -2    3.69    0.77
   8   7  -6    3.33    1.14
   9   6  -4   11.13    1.07
  10   7 -11   11.31    1.34
  10   7  -8    2.22    1.33
  11   4  -3   31.09    1.40
  11   6  -6  105.95    2.41
  13   5  -7   32.67    1.86
  13   6 -11   36.55    1.60
  13   6 -10    6.72    1.31
  15   1  -6    6.17    1.33
  15   4 -14    3.08    0.85
  16  -1  -7    4.25    1.10
  16   1  -8    6.71    1.24
  16   2  -9    1.53    1.05
  16   3 -12    6.96    1.02
  16   3 -11    1.57    0.91
  17   1 -14    1.52    0.46
  17   1 -12    0.20    0.71
   7   7  -6   21.10    1.03
   9   1   0    5.84    0.80
   9   3  -1  602.32    3.76
   9   7  -7  135.20    2.28
  10   2  -1    1.52    0.80
  10   7 -10    9.13    1.20
  10   7  -9    6.41    1.17
  12   6 -13    3.53    0.95
  12   6  -8    4.63    1.41
  13   2  -4   34.87    1.75
  14   5 -13    6.54    1.00
  14   5 -12    2.19    1.22
  14   5 -11    3.50    1.38
  14   5 -10    1.76    1.25
  15   2  -7    3.16    1.22
  15   3  -8   13.99    1.40
  15   4 -13    4.07    0.98
  16  -2  -7    2.13    1.06
  17  -1 -10    1.17    0.79
  17   1 -13    4.36    0.57
   7   5  -2   41.13    1.10
   8   6  -4   34.47    1.23
   8   7  -8   28.23    1.39
   9   4  -2   30.40    1.16
   9   5  -3   29.43    1.23
   9   7  -8   14.45    1.22
  11   2  -2   33.90    1.32
  12   2  -3   14.52    1.21
  12   5  -6    6.14    1.33
  13   3  -5  109.64    2.47
  13   4  -6    8.51    1.42
  13   5 -14    3.61    1.06
  13   5  -8   20.52    1.79
  15   4 -12    4.56    1.04
  16   0  -8    3.38    1.23
  16   2 -15   14.94    0.77
  16   2 -10   12.12    1.16
  17  -2 -10    0.64    0.72
   7   6  -4    2.50    0.76
   9   6  -5   10.40    1.09
  10   3  -2   11.53    1.04
  10   4  -3    9.18    1.20
  10   5  -4   76.62    1.84
  10   6  -6    7.36    1.22
  11   5  -5    7.13    1.28
  12   3  -4    7.92    1.40
  12   6 -10   75.74    2.09
  13  -1  -3   50.86    1.57
  15   3 -15    8.15    0.76
  15   3  -9   41.87    1.76
  16   1  -9   22.86    1.37
  16   2 -11    0.62    1.13
  17  -3 -10    1.28    0.63
  17  -1 -11    0.35    0.79
  17   0 -14   21.27    0.81
   8   3  -1  241.36    2.38
   8   5  -3  134.73    1.97
  10   1  -1   23.93    1.04
  11   6  -8   23.85    1.61
  12   5  -7    5.19    1.62
  13   1  -4   22.98    1.60
  13   5 -13   60.40    1.82
  14   3 -16    0.28    0.65
  14   4 -14   20.94    1.25
  15  -1  -6    6.34    1.37
  15   1  -7   33.78    1.60
  15   2  -8    5.46    1.38
  16  -1  -8    7.07    1.29
  16   2 -13   -0.28    0.94
   8   4  -2   15.00    0.91
   8   6  -5   46.22    1.40
   9   2  -1   78.30    1.50
   9   5  -4   31.35    1.46
   9   6  -6   68.49    1.86
  10   6  -7    4.12    1.20
  11   1  -2    8.43    1.01
  11   5  -6    4.35    1.51
  11   6 -11   -0.78    1.38
  11   6  -9   36.81    1.82
  12   1  -3   16.65    1.22
  12   5 -14   13.15    1.20
  13   4  -7   -1.29    1.37
  13   5 -12   36.24    1.80
  15  -2  -6   13.92    1.37
  15   2 -16    4.43    0.54
  16  -2  -8   12.12    1.31
  16   1 -10    4.15    1.15
  17  -3 -11    2.22    0.69
  17  -2 -11    2.68    0.76
  17  -1 -13    7.06    0.76
  17  -1 -12    0.56    0.66
   7   6  -5   65.88    1.43
  10   5  -5   96.70    2.06
  10   6 -12   20.40    1.43
  12   4  -6    3.61    1.57
  12   5  -8    8.91    1.71
  13   2  -5    8.56    1.30
  13   3  -6    7.78    1.45
  13   4 -15    8.50    0.92
  14   4 -12   24.58    1.67
  14   4 -11    1.28    1.54
  15   2  -9    1.48    1.59
  15   3 -13   12.99    1.16
  15   3 -12    5.30    1.18
  16  -3  -8    6.69    1.12
  16   1 -15    4.59    0.68
  17  -2 -12    4.58    0.77
   8   6  -6   34.10    1.31
  10   2  -2   19.19    1.09
  10   4  -4   29.78    1.54
  10   6 -11   33.48    1.72
  11   2  -3   18.43    1.28
  11   4  -5    3.15    1.23
  12   2  -4  131.24    2.41
  12   3  -5   20.72    1.53
  12   5 -13   70.08    2.00
  13   0  -4   34.32    1.49
  13   4  -8    4.29    1.46
  14   3 -15   10.25    1.06
  15   2 -15   29.20    1.24
  16   1 -12    6.17    1.21
  16   1 -11   21.51    1.36
  17  -3 -12    0.40    0.64
  17  -2 -13    0.33    0.57
   7   6  -6  283.00    2.74
   8   5  -4   21.59    1.07
  10   3  -3   29.18    1.29
  10   6 -10  295.70    3.40
  11   0  -2   60.16    1.52
  11   3  -4   38.75    1.56
  11   5  -7   10.94    1.43
  12   5 -10    2.59    1.66
  12   5  -9    5.34    1.45
  13   4 -14   47.77    1.72
  15  -1  -7   36.05    1.89
  16   0 -10   38.65    1.59
   7   6  -7   74.32    1.64
   9   1  -1   36.09    1.10
   9   5  -5   61.99    1.65
   9   6 -10   12.19    1.43
   9   6  -8   25.04    1.38
  10   5  -6   22.01    1.38
  12   5 -11    7.31    1.52
  13  -1  -4   26.61    1.47
  13   1  -5   11.32    1.43
  13   2  -6   19.97    1.88
  13   4  -9   19.52    1.70
  14   2 -16    9.53    0.95
  14   3 -14   27.30    1.53
  15   1 -16    3.88    0.77
  15   2 -11    2.22    1.46
  16  -2  -9    2.37    1.11
   7   6  -8  130.86    2.11
   8   4  -3    9.00    0.86
   8   6  -9    3.04    1.16
   8   6  -8   99.95    1.97
  10   1  -2   39.08    1.43
  11   4  -6  111.35    2.50
  11   5  -8    6.40    1.40
  12  -1  -3   16.12    1.34
  12   1  -4    1.38    1.17
  15  -2  -7    2.82    1.31
  16  -4  -9    8.57    1.04
  16  -1 -10    4.21    1.10
   8   5  -5   68.54    1.60
   9   2  -2   37.86    1.22
   9   4  -4  110.76    1.98
  10   5  -7   30.77    1.56
  11   1  -3    8.91    1.12
  11   5  -9   58.48    2.01
  12   4  -8   58.62    2.15
  14   3 -13    3.70    1.23
  16  -1 -15    1.54    0.41
   0  10  -2  187.60    1.60
   1  11  -2    1.07    0.68
   2   9   1  299.80    2.00
   2  11  -1   72.99    1.23
   2  12  -3   26.05    1.04
   3  12  -2   21.83    0.96
   3  13  -6    3.05    0.76
   3  13  -5   51.27    1.38
   5   7   2   26.39    0.67
   7   8   1    5.57    0.65
   7  11  -1    5.90    0.82
   7  12  -2   20.53    1.14
   7  14  -9    0.11    0.61
   7  14  -7    1.06    0.75
   8   9   0    1.53    0.72
   8  13  -4    3.34    0.97
   8  14  -9    2.09    0.61
   8  14  -8   15.30    0.78
   9  13  -5   32.80    1.08
  10  11  -3   14.16    0.87
  10  13  -6    0.91    0.76
  11  10  -3    7.90    0.81
  11  11  -4   20.37    0.88
  12  12  -7    8.30    0.62
  13  11  -7    4.56    0.51
   3   8   2   10.66    0.61
   3  13  -4    5.29    0.99
   4   8   2   63.36    1.03
   4  11   0   17.58    0.97
   4  13  -3    3.41    0.99
   5  13  -3   16.63    1.01
   5  14  -7    5.56    0.88
   6   9   1   26.36    0.86
   6  14  -9    1.91    0.70
   6  14  -6   19.23    0.98
   7  10   0   11.76    0.81
   7  14  -6    2.03    0.78
   8  14 -10   17.52    0.63
   8  14  -7    1.14    0.67
   9   8   0   12.39    0.75
   9  12  -3   21.93    0.99
   9  14 -10    2.93    0.53
   9  14  -9    0.71    0.51
  10  12  -4   46.24    1.12
  11  12  -5    2.82    0.73
  11  13  -7    3.38    0.60
  12  10  -4    3.61    0.59
  12  11  -5    1.32    0.63
  13  12  -9    7.32    0.46
   1   9   1  248.58    1.76
   1  10   0   20.09    0.72
   1  12  -5   21.72    0.96
   2  12  -2   87.64    1.47
   3  10   1   45.19    1.07
   3  11   0   12.76    0.78
   4  10   1    2.95    0.62
   4  12  -1   19.06    0.97
   5   8   2   47.23    0.95
   5  11   0    1.89    0.73
   5  12  -1   10.22    0.90
   5  14  -8    2.75    0.70
   5  14  -6   19.60    0.98
   6  14  -5    0.24    0.91
   8  14  -6   27.00    0.96
   9  14 -11    0.78    0.38
   9  14  -7    2.05    0.62
  10   9  -1   32.05    0.96
  12  13 -10    0.35    0.25
  12  13 -10    0.20    0.17
  12  13  -9    6.09    0.45
   0  11  -3    2.76    0.67
   1  11  -1   69.34    1.17
   1  12  -4   11.05    0.74
   3  12  -1   90.87    1.46
   3  13  -3   51.36    1.23
   5  10   1   24.29    0.87
   5  14  -5   26.82    1.07
   6  11   0    3.40    0.75
   6  12  -1    1.71    0.81
   6  14 -10    2.29    0.57
   7   9   1   89.47    1.29
  10  14 -10    1.40    0.40
  10  14  -9    1.43    0.44
  12  12  -6   15.54    0.67
  13  12  -8    2.66    0.36
   1  12  -3    1.64    0.65
   2  10   1    8.27    0.62
   2  13  -6    2.00    0.68
   2  13  -5  112.26    1.59
   2  13  -4   14.47    1.00
   3   9   2    1.93    0.49
   4   9   2   68.02    1.09
   4  13  -2   12.93    0.95
   4  14  -7    0.53    0.72
   4  14  -6   21.74    0.96
   5  13  -2    0.34    0.81
   6   8   2   74.13    1.16
   6  10   1   23.51    0.89
   6  14  -4   39.94    1.19
   8   8   1    1.91    0.52
   8  13  -3   84.79    1.47
   8  14  -5    4.99    0.74
   9   9   0   49.41    1.08
   9  14  -6   23.04    0.85
  10  14  -7    3.00    0.59
  11  13  -6    3.65    0.54
   0   9   1  272.15    1.80
   0  10   0   45.56    0.92
   0  11  -2    0.62    0.51
   1  12  -2  129.83    1.62
   2   9   2   49.73    0.90
   2  12  -1    2.36    0.69
   3  13  -2   99.43    1.56
   4  14  -8    3.86    0.64
   7  11   0   61.41    1.24
   7  14  -4    4.96    0.81
   9  12  -2   27.93    1.05
  10  11  -2    2.05    0.66
  10  12  -3    9.03    0.76
  11  11  -3    3.13    0.60
  11  12  -4   10.03    0.64
  -1  10  -2   71.21    0.97
   1  10   1   12.29    0.63
   1  11   0    2.21    0.57
   3  11   1  179.86    1.82
   3  14  -6  104.27    1.53
   4   7   3   69.18    0.92
   4  12   0  253.86    2.27
   5  11   1   10.24    0.90
   5  12   0   26.71    1.03
   6  14  -3    1.21    0.93
   7  10   1   26.77    0.99
   8   9   1    9.52    0.73
   8  14  -4   15.77    0.85
   9  13  -3   47.47    1.15
   9  14  -5    1.03    0.60
  10  10  -1    1.97    0.69
  10  13  -4    1.30    0.59
  10  14  -6    9.08    0.62
  11  14  -9   -0.20    0.16
  12  11  -4    0.40    0.49
  12  12  -5    0.68    0.49
  12  13  -7    0.81    0.41
  13  12  -7    1.95    0.39
   0  11  -1    6.04    0.58
   1   9   2   51.58    0.89
   1  12  -1    3.33    0.77
   2  11   1    2.83    0.63
   2  13  -2    3.42    0.75
   3   8   3   13.20    0.63
   3  10   2    5.03    0.60
   3  14  -7    4.72    0.80
   4  10   2   72.62    1.19
   4  13  -1   73.15    1.41
   5  13  -1   23.80    1.04
   6   9   2    9.92    0.66
   6  12   0    5.20    0.80
   6  15  -7   29.39    0.92
   6  15  -6    1.66    0.71
   7   8   2   64.17    1.08
   7  14  -3    0.60    0.75
   7  15  -8    8.70    0.58
   7  15  -7    6.76    0.60
   7  15  -6    2.01    0.69
   8  13  -2    7.07    0.80
   8  15  -8    1.82    0.51
   8  15  -7    1.47    0.56
  11  13  -5   31.87    0.78
  11  14  -8   13.27    0.46
  -1  10  -1   10.98    0.53
   0  12  -3    1.04    0.68
   1  13  -4    4.08    0.83
   2  10   2    6.90    0.62
   2  12   0   97.86    1.45
   3  13  -1   60.01    1.29
   4   8   3    2.25    0.45
   5  10   2   69.75    1.20
   5  15  -6    1.40    0.75
   6  11   1    4.53    0.70
   6  15  -8    2.77    0.53
   6  15  -5   17.52    0.90
   7  15  -9   23.47    0.64
   8  15  -9    7.07    0.47
   8  15  -6   11.94    0.71
   9  14  -4    4.35    0.69
   9  15  -8   10.97    0.54
  11  14  -7    2.18    0.42
   0  12  -2    8.73    0.78
   1  11   1   63.18    1.11
   1  13  -3   30.27    0.97
   2  13  -1   35.86    1.14
   4  12   1    3.87    0.89
   6  14  -2    4.10    0.81
   6  15  -9    1.68    0.45
   7   9   2    3.78    0.66
   7  13  -1    9.28    0.86
   7  15  -5   17.43    0.77
   8  10   1   37.69    1.01
   8  14  -3    7.59    0.73
   9  15  -9    0.16    0.18
  10  12  -2   28.77    0.92
  10  14  -5    2.80    0.50
  11  12  -3    0.54    0.56
  12  13  -6    7.07    0.46
  -1  10   0   19.40    0.62
  -1  11  -2   11.38    0.68
   1  10   2   71.76    1.09
   1  12   0   48.03    1.07
   1  13  -2   -0.87    0.75
   2   9   3   68.88    1.02
   3   9   3   45.68    0.92
   3  12   1   63.76    1.26
   4   9   3   69.14    1.09
   4  11   2   53.90    1.21
   4  15  -6    4.99    0.75
   4  15  -5   22.78    0.94
   5  15  -8    1.88    0.50
   5  15  -4   22.88    0.98
   6  10   2   86.61    1.29
   6  15  -4    2.97    0.71
   7  11   1    5.62    0.75
   7  14  -2    2.83    0.84
   9  12  -1   15.12    0.77
   9  13  -2    2.36    0.60
   9  15  -6    0.06    0.48
  10  11  -1    3.58    0.68
  10  13  -3   16.24    0.72
  11  14  -6    6.69    0.49
  -1  11  -1   65.48    1.06
   2  11   2    5.46    0.67
   2  12   1  130.71    1.62
   2  14  -3   28.59    1.01
   4  15  -4   14.48    0.92
   5  11   2   16.69    0.82
   6   8   3    4.30    0.59
   7  15  -4    0.48    0.61
   8  12   0    7.47    0.86
   9  11   0    4.34    0.71
  11  13  -4    1.11    0.36
  11  13  -4    0.11    0.23
  12  12  -4    1.50    0.40
   0  10   2  190.08    1.63
   0  11   1    5.98    0.61
   1   9   3  130.06    1.32
   1  13  -1    4.28    0.73
   2  13   0   59.63    1.25
   2  14  -2    5.78    0.90
   3  10   3   19.49    0.75
   3  14  -1   10.81    1.00
   4  10   3   27.22    0.91
   5  15  -3   28.11    0.97
   6  14  -1   10.51    0.85
   6  15  -3    2.32    0.69
   7  10   2   14.88    0.83
   8  14  -2   59.31    1.16
   8  15  -4    0.93    0.62
   9  14  -3    0.66    0.54
   9  15  -5   11.13    0.60
  10  15  -7   18.46    0.52
  -1   9   2  190.53    1.49
  -1  10   1   74.79    1.02
  -1  11   0    1.38    0.61
   0  13  -3   28.37    0.92
   1  12   1    9.04    0.75
   2  10   3    0.37    0.53
   3   7   4   52.65    0.81
   3  15  -6   -0.04    0.60
   3  15  -4    6.79    0.83
   4   7   4   11.09    0.55
   4  15  -3   30.37    0.99
   6   9   3    9.62    0.75
   6  11   2    1.26    0.65
   7  13   0    9.56    0.75
   7  15  -3    4.93    0.63
  10  15  -6    0.28    0.35
  11  14  -5    5.33    0.44
  12  13  -5    3.08    0.38
   0   9   3   19.49    0.62
   0  13  -2    4.36    0.77
   1  10   3   63.13    1.05
   1  13   0   17.33    0.85
   1  14  -3    0.87    0.82
   2   8   4   49.18    0.84
   3   8   4  110.17    1.20
   3  12   2    3.75    0.76
   3  13   1  152.32    1.79
   3  15  -3   10.98    0.91
   4   8   4   79.39    1.09
   4  12   2  124.79    1.61
   4  13   1  176.99    1.91
   5  10   3   79.67    1.23
   5  13   1    5.08    0.80
   5  15  -2    2.88    0.74
   6  15  -2   -0.25    0.72
   7  14  -1   14.96    0.82
  10  12  -1    3.20    0.59
  10  13  -2    1.03    0.52
   0  11   2    0.72    0.53
   0  13  -1   48.30    1.14
   1   8   4  196.27    1.48
   1  14  -2   20.57    1.00
   2  12   2  152.66    1.72
   2  13   1    3.87    0.77
   3   9   4   23.04    0.83
   3  11   3  194.06    1.85
   3  14   0   47.27    1.19
   4  11   3    6.96    0.83
   5   7   4    4.50    0.50
   5  12   2   13.59    0.87
   5  14   0   32.82    1.06
   6  16  -7    5.58    0.47
   6  16  -6   38.30    0.78
   7  11   2   54.84    1.14
   8  15  -3    4.92    0.56
   8  16  -7    0.10    0.34
   9  12   0    5.94    0.68
   9  13  -1    3.97    0.58
   9  14  -2   17.35    0.73
   9  15  -4    0.33    0.42
  11  12  -2    8.95    0.54
  -2  10   0  255.94    1.70
  -1  10   2  114.84    1.25
  -1  11   1   67.71    1.06
  -1  12  -1    8.98    0.66
   0  10   3   18.79    0.69
   0  12   1   17.44    0.80
   1  12   2   88.26    1.35
   2   9   4    2.35    0.48
   2  14   0    2.38    0.87
   2  15  -4    4.21    0.78
   4   9   4   44.28    0.91
   5   8   4    5.01    0.58
   5  11   3   10.47    0.86
   5  16  -6   18.56    0.62
   5  16  -5    0.28    0.51
   6  10   3    4.56    0.60
   6  14   0    3.96    0.74
   6  16  -4   20.30    0.75
   7  15  -2    1.19    0.58
   7  16  -5    0.74    0.42
   8  13   0    3.99    0.64
   8  16  -6    1.00    0.33
  10  14  -3    5.99    0.47
  10  15  -5    6.69    0.41
  -1   9   3   47.68    0.86
  -1  12   0   49.07    1.04
   0   8   4    4.84    0.41
   1   9   4   22.55    0.68
   1  13   1   61.04    1.24
   1  14  -1    1.12    0.69
   2  15  -5   36.86    0.90
   3  10   4   55.52    1.09
   5  15  -1   25.00    0.91
   5  16  -7    5.32    0.45
   5  16  -4   32.21    0.82
   6  15  -1    1.07    0.72
   7  16  -4    3.20    0.50
   8  16  -5   -0.46    0.39
  11  14  -4   23.65    0.55
  -2   9   2    2.71    0.47
   0  12   2    9.96    0.81
   2  10   4  111.28    1.35
   2  13   2    1.22    0.84
   2  15  -2    3.21    0.73
   3  12   3   57.71    1.19
   3  13   2    3.19    0.76
   3  15  -1   14.25    0.86
   4  10   4   38.82    1.00
   4  12   3    3.38    0.83
   4  13   2    8.45    0.80
   4  16  -6    3.28    0.49
   4  16  -4    3.18    0.59
   5   9   4    0.33    0.51
   5  14   1    2.19    0.83
   5  16  -3   17.25    0.70
   6  11   3    1.93    0.74
   6  16  -3   10.00    0.66
   7  13   1    3.93    0.64
   7  14   0    3.86    0.64
   9  15  -3    9.60    0.50
  -2  11   0    3.87    0.48
  -1  11   2    2.68    0.57
  -1  12   1    3.38    0.70
  -1  13  -2   70.58    1.18
   0   9   4   14.83    0.59
   0  13   1   46.10    1.15
   1  10   4   21.53    0.75
   1  14   0    4.01    0.75
   2  12   3    1.82    0.70
   2  14   1   17.71    0.90
   2  15  -1   23.38    0.98
   4  15   0    4.05    0.83
   4  16  -3   21.30    0.76
   7  12   2   75.33    1.21
   7  15  -1   17.34    0.71
   7  16  -3    0.75    0.47
   8  16  -4    1.85    0.38
  10  13  -1    4.66    0.49
  -2  10   2   41.98    0.84
  -1  13  -1   61.55    1.13
   0  14  -1    4.09    0.79
   1  13   2   73.86    1.31
   1  15  -3   44.35    1.07
   2   7   5  104.28    1.08
   2  11   4   20.81    0.83
   3   7   5  408.89    2.07
   3   8   5    0.83    0.54
   3  11   4   12.87    0.77
   3  15   0    7.06    0.79
   3  16  -5    1.73    0.54
   3  16  -4   33.11    0.87
   3  16  -3   12.50    0.74
   5  10   4    5.50    0.61
   5  12   3    3.34    0.66
   5  15   0    7.11    0.72
   5  16  -2   46.90    0.95
   6   9   4   44.04    0.95
   6  13   2    5.76    0.69
   6  14   1    1.20    0.64
   6  16  -2    8.71    0.64
   9  13   0    9.27    0.57
   9  14  -1    5.74    0.49
  10  14  -2    1.79    0.38
  -2  11   1   81.59    1.11
  -1  13   0   17.34    0.85
   1   8   5   65.51    0.94
   1  11   4   52.39    1.07
   1  14   1   26.62    0.96
   2   9   5  214.27    1.74
   3   9   5    4.56    0.64
   4   8   5   41.57    0.86
   4  11   4   13.95    0.75
   8  13   1   36.39    0.85
   8  14   0   25.40    0.75
   9  12   1    0.65    0.53
  -2   9   3  137.87    1.25
  -1  11   3   26.82    0.80
  -1  12   2  137.58    1.53
   0  12   3    0.67    0.65
   0  13   2    3.52    0.71
   0  14   0   24.91    0.91
   1   9   5  112.89    1.27
   1  15  -1   11.88    0.78
   2  13   3   12.69    0.85
   3  13   3   55.27    1.18
   3  16  -2    8.75    0.68
   4  14   2   49.37    1.13
   4  16  -1   -0.05    0.64
   5  16  -1    4.78    0.64
   6  10   4  102.05    1.34
   7  14   1    2.04    0.60
   7  16  -2    1.72    0.43
   8  15  -1   21.02    0.63
   8  16  -3   -0.30    0.28
   8  16  -3    0.25    0.19
   9  15  -2   -0.15    0.28
   9  15  -2    0.11    0.19
  -2  10   3   31.62    0.82
  -2  11   2    2.29    0.51
  -2  12   0   99.39    1.24
  -1  10   4    3.91    0.52
   0   9   5   47.92    0.92
   0  11   4   11.34    0.72
   1  10   5    5.36    0.68
   1  13   3   64.22    1.24
   1  15   0   57.89    1.22
   2  10   5   -0.45    0.55
   2  12   4   20.25    0.89
   2  16  -3    4.23    0.65
   3  10   5    0.93    0.59
   3  12   4   13.86    0.82
   3  16  -1    6.83    0.72
   4  12   4  109.90    1.50
   4  15   1   51.45    1.10
   5  13   3    4.61    0.78
   5  14   2    3.97    0.69
   5  15   1   19.69    0.87
   7  13   2   10.64    0.63
   7  15   0    6.88    0.55
  -3   9   2   19.62    0.59
  -3  10   1   18.02    0.62
  -2  12   1    2.06    0.57
   1  12   4    2.20    0.70
   1  14   2   21.82    0.92
   2  15   1   60.23    1.20
   2  16  -2    6.24    0.59
   4  10   5   24.81    0.90
   5   8   5   38.62    0.79
   5  17  -4    1.06    0.39
   6  14   2    7.26    0.70
   6  17  -5   17.62    0.45
   6  17  -5    2.79    0.22
   6  17  -4    1.27    0.35
  -2   9   4   41.71    0.78
  -1   8   5   11.25    0.50
  -1  12   3    1.96    0.62
  -1  13   2   -0.25    0.65
   0  10   5    1.21    0.56
   0  13   3   32.31    0.99
   0  15  -2   29.92    0.92
   0  15  -1    3.28    0.74
   2  11   5    6.58    0.71
   2  16  -1    4.28    0.63
   3  11   5  111.13    1.47
   3  14   3    0.76    0.80
   3  16   0    5.37    0.72
   4  16   0    3.67    0.59
   5   9   5   75.48    1.10
   5  16   0   26.26    0.82
   5  17  -3    8.97    0.49
   6  13   3   12.87    0.81
   6  15   1    8.02    0.60
   7  12   3   43.89    0.91
   7  16  -1   12.73    0.55
   8  16  -2    1.08    0.34
  10  14  -1    0.76    0.32
  -3  10   2  196.36    1.53
  -2  11   3   17.56    0.72
  -2  12   2   89.74    1.25
  -2  13   0   60.05    1.11
  -1   9   5   29.58    0.73
  -1  14   0    5.07    0.66
   1  11   5   40.05    0.99
   2  13   4    5.84    0.77
   3  15   2   25.78    0.91
   4  11   5    7.14    0.80
   4  14   3    4.15    0.71
   4  15   2    1.50    0.71
   4  17  -4    0.72    0.29
   4  17  -4    0.49    0.19
   4  17  -3    2.14    0.45
   6  17  -3   12.13    0.42
   8  14   1    2.41    0.45
   8  15   0    2.14    0.43
   9  13   1   17.33    0.59
   9  15  -1    2.19    0.34
  -3   9   3  129.66    1.20
  -3  11   1  283.82    1.86
  -2  10   4   11.33    0.59
  -1  10   5   46.79    0.94
  -1  14   1    0.18    0.76
   0  11   5   33.17    0.93
   1   7   6   61.35    0.86
   1   8   6  294.00    1.88
   1   9   6    1.18    0.60
   1  13   4   22.00    0.93
   1  16  -3   15.92    0.71
   1  16  -2    7.33    0.68
   2   9   6    1.09    0.54
   2  12   5   17.45    0.94
   2  15   2   21.30    0.90
   2  16   0    6.97    0.65
   3   7   6   77.17    0.99
   3   8   6    7.99    0.61
   4  17  -2    0.99    0.47
   5  14   3   26.02    0.83
   5  15   2   34.83    0.91
   5  17  -2    5.82    0.43
   6  16   0   21.61    0.64
   7  14   2    2.61    0.57
   7  15   1   14.45    0.62
  -3  10   3    1.96    0.53
  -3  11   2   10.36    0.69
  -2   8   5   38.03    0.75
  -2  11   4   96.21    1.30
  -2  12   3   27.56    0.94
  -1  12   4   11.05    0.77
  -1  13   3   30.00    0.97
   0   7   6   29.45    0.64
   0   9   6  131.78    1.40
   0  13   4   15.92    0.97
   0  15   1    2.86    0.80
   1  12   5    2.01    0.70
   1  15   2    0.98    0.71
   1  16  -1    0.76    0.56
   2  10   6  134.60    1.53
   3   6   6   35.28    0.67
   3   9   6   32.45    0.82
   3  12   5   38.82    1.01
   3  17  -3    2.15    0.41
   3  17  -2    3.96    0.51
   4  16   1    5.55    0.59
   5  11   5    3.69    0.72
   6  17  -2    1.64    0.33
  -2   9   5   30.37    0.72
  -2  13   2    3.20    0.76
  -1  11   5   32.47    0.91
  -1  14   2   21.48    0.87
   0  12   5    8.34    0.76
   0  14   3    5.66    0.76
   1  10   6   34.35    0.90
   1  16   0    9.82    0.69
   2  16   1   -0.31    0.60
   3  10   6   19.01    0.75
   4   8   6   17.32    0.61
   4   9   6   80.70    1.18
   5  16   1    1.50    0.48
   5  17  -1    5.86    0.43
   6  14   3    7.78    0.67
   6  15   2    1.11    0.53
   7  16   0   30.20    0.64
   8  16  -1    1.08    0.24
   8  16  -1    0.21    0.15
  -3   9   4    9.70    0.50
  -3  11   3  117.04    1.36
  -3  12   1   94.00    1.19
  -2  10   5   28.00    0.78
  -1   7   6    6.85    0.42
  -1   8   6  321.31    1.91
  -1   9   6    1.97    0.58
  -1  15  -1   22.62    0.84
   0  10   6  288.95    2.07
   0  15   2   29.83    1.00
   1  11   6   71.01    1.27
   2  11   6    1.98    0.64
   2  14   4   26.23    0.96
   2  15   3   64.67    1.17
   3  14   4   58.33    1.15
   3  15   3   17.97    0.80
   3  17  -1    7.05    0.53
   4  14   4   23.22    0.90
   4  15   3   13.30    0.77
   6  16   1    1.06    0.46
   6  17  -1    5.12    0.39
  -3  10   4   21.28    0.69
  -2  12   4  157.67    1.64
  -2  13   3   19.24    0.92
  -2  14   0    3.57    0.67
  -1  10   6   24.44    0.88
  -1  13   4    3.58    0.77
  -1  14   3    0.76    0.80
   0  11   6   18.58    0.84
   0  16  -1   18.70    0.76
   1  13   5    6.73    0.78
   1  15   3    8.11    0.76
   1  16   1   29.69    0.84
   2  17  -3    3.67    0.43
   2  17  -2    2.42    0.43
   3  11   6    1.27    0.63
   3  16   2    8.58    0.63
   4  10   6    6.64    0.62
   4  16   2   12.58    0.66
   4  17   0   -0.33    0.45
   5  12   5    7.96    0.65
   6  11   5    1.38    0.59
   6  13   4   41.44    0.90
   7  12   4    2.12    0.51
  -2  11   5   16.77    0.76
  -1  15   1   11.72    0.70
   0  16   0    4.15    0.66
   1  12   6   13.16    0.92
   2  12   6   73.91    1.33
   2  16   2   16.55    0.72
   2  17  -1    8.80    0.52
   3  17   0    2.00    0.45
   4  11   6   12.69    0.80
   4  13   5   73.27    1.16
   5   9   6   73.17    1.08
   5  14   4   10.22    0.69
   5  15   3    1.97    0.49
   5  17   0    0.38    0.36
   7  15   2    0.23    0.40
   8  14   2    2.62    0.38
  -4   9   3  229.92    1.56
  -4  10   2  108.78    1.15
  -3   9   5  101.16    1.15
  -3  12   3    4.20    0.61
  -3  13   1   61.35    1.08
  -2  14   2    4.98    0.68
  -1  15   2    0.17    0.72
   0   8   7    5.20    0.62
   0  12   6    9.66    0.89
   0  15   3   21.26    0.87
   0  16   1   17.76    0.80
   1   7   7   61.06    0.88
   1   8   7   20.52    0.68
   1   9   7   15.28    0.71
   1  16   2   32.96    0.86
   2   8   7   13.64    0.61
   2   9   7  123.36    1.42
   2  17   0    0.50    0.46
   5  16   2    9.39    0.51
   7  14   3    0.28    0.43
  -4  10   3   70.88    1.02
  -3  10   5    3.19    0.54
  -3  13   2  105.35    1.39
  -2  12   5    6.56    0.72
  -2  13   4   13.78    0.82
  -1  13   5    9.08    0.80
   0   7   7  195.23    1.48
   0   9   7    6.62    0.59
   0  10   7   79.35    1.28
   1  10   7   12.37    0.71
   1  14   5    6.83    0.78
   1  17  -2   -0.09    0.39
   1  17  -1   11.44    0.57
   2  10   7    0.82    0.70
   2  14   5    9.27    0.76
   2  15   4    3.30    0.65
   3   8   7   35.20    0.83
   3   9   7    2.78    0.63
   3  14   5   18.73    0.87
   3  15   4    3.61    0.62
   3  17   1    4.26    0.46
   4  17   1    4.74    0.47
   5  13   5    1.88    0.59
   6  12   5    0.76    0.57
   6  15   3    5.35    0.51
   6  17   0    0.37    0.22
   7  16   1    2.43    0.33
  -4   9   4  137.69    1.29
  -4  11   2   22.88    0.68
  -3  11   5   37.94    0.99
  -3  12   4   29.16    0.88
  -2  11   6    0.19    0.73
  -2  14   3   27.44    0.90
  -1   9   7   45.00    0.91
  -1  15   3   47.48    1.09
   0   6   7   16.19    0.50
   1  11   7   22.11    0.95
   1  17   0    2.74    0.49
   2   6   7   22.82    0.58
   2  16   3    0.53    0.56
   2  17   1    3.38    0.47
   3  10   7   21.24    0.84
   3  16   3    0.03    0.52
   4  12   6   81.66    1.19
   4  14   5   10.95    0.71
   4  15   4    5.36    0.57
   4  16   3    8.61    0.56
   5  11   6    0.71    0.59
   5  17   1    9.43    0.44
   6  16   2    5.76    0.44
  -4  10   4    8.87    0.62
  -3   9   6   13.98    0.70
  -2  15   1   24.16    0.84
  -1  16   0    7.92    0.61
   0  11   7    6.89    0.73
   0  13   6   23.89    0.93
   0  15   4    0.56    0.66
   1  16   3   23.85    0.77
   2  11   7   77.60    1.21
   3  13   6    0.74    0.60
  -3   7   6   57.47    0.80
  -3  10   6   18.81    0.73
  -3  12   5   31.85    1.01
  -2   8   7   16.30    0.61
  -2  12   6   27.30    0.93
  -1  11   7   19.51    0.86
  -1  13   6    1.63    0.83
  -1  16   1    0.25    0.61
   0  16   3    2.22    0.66
   1  12   7   10.62    0.88
   1  17   1    1.00    0.46
   2  17   2    1.14    0.49
   3  11   7  204.59    1.77
   3  17   2    0.20    0.39
   4  10   7    0.32    0.62
   5  16   3    1.09    0.41
  -4   9   5  269.78    1.78
  -3  11   6   22.54    0.91
  -3  13   4    5.24    0.72
  -2   7   7   60.21    0.87
  -2  10   7    5.95    0.66
  -1  15   4   10.54    0.75
  -1  16   2    8.93    0.71
   0  12   7    4.99    0.73
   1  14   6   44.46    1.10
   1  15   5    3.43    0.64
   2  14   6   32.65    0.94
   2  15   5   50.93    0.99
   2  16   4   33.18    0.82
   3  15   5   25.19    0.80
   4  13   6    7.54    0.61
   4  17   2    6.79    0.42
   5  14   5    8.59    0.53
  -4  10   5    1.22    0.52
   0   8   8    3.44    0.55
   0   9   8    2.58    0.57
   0  14   6    2.97    0.72
   0  15   5   17.03    0.80
   1   8   8  113.29    1.27
   1   9   8    2.32    0.58
   1  16   4   15.48    0.67
   1  17   2    9.74    0.54
   3  12   7    4.28    0.64
   3  14   6   87.73    1.20
   3  16   4   36.58    0.76
   5  17   2    1.72    0.30
  -4  11   5    7.89    0.65
  -4  12   4  180.88    1.67
  -3   9   7   35.61    0.84
  -3  13   5   55.71    1.11
  -2  13   6    2.06    0.72
  -1   8   8  169.90    1.51
  -1   9   8   88.24    1.22
  -1  14   6    8.82    0.88
  -1  16   3   19.90    0.79
   0   7   8   27.61    0.70
   0  10   8    3.69    0.65
   0  16   4    7.90    0.71
   0  17   1    5.20    0.47
   1   7   8    2.08    0.49
   1  10   8   28.40    0.88
   1  13   7   48.28    1.07
   2   7   8    3.94    0.52
   2   8   8    4.98    0.56
   2  10   8  174.97    1.70
   2  13   7   16.72    0.85
   2  17   3    5.31    0.50
   3  17   3   17.52    0.56
   4  15   5   10.30    0.53
   4  16   4    6.05    0.44
   6  15   4    0.87    0.35
   6  16   3    0.04    0.29
   7  14   4   23.38    0.54
  -4   8   6    8.06    0.51
  -4   9   6   95.74    1.17
  -4  13   2   12.64    0.68
  -3   7   7   60.39    0.87
  -3  10   7    6.73    0.66
  -2  12   7    8.20    0.78
  -1   7   8   42.68    0.81
  -1  10   8    5.71    0.69
  -1  15   5   49.06    1.03
   0   6   8   39.88    0.78
   0  11   8   17.17    0.84
   0  17   2   15.99    0.62
   1   6   8   72.97    0.95
   1  11   8    8.40    0.70
   1  17   3    6.63    0.53
   3   8   8   30.80    0.80
   3   9   8   72.64    1.11
   4  12   7    7.07    0.65
   4  14   6    7.56    0.60
  -5   8   4  150.87    1.23
  -5   9   4    0.92    0.39
  -5  10   4  120.19    1.28
  -4   7   6   11.28    0.48
  -4  11   6   23.60    0.91
  -4  12   5   36.87    0.94
  -2   8   8   30.87    0.77
  -2   9   8   10.31    0.67
  -2  10   8   21.00    0.84
  -2  16   1    3.44    0.57
  -1   6   8  147.51    1.28
  -1  11   8    2.12    0.70
  -1  16   4   18.44    0.76
   1  15   6    4.80    0.63
   1  16   5    0.34    0.56
   2  15   6    0.96    0.58
   2  16   5   10.18    0.59
   3  10   8   35.26    0.91
   3  13   7   34.96    0.85
   4  17   3    6.90    0.33
   5  16   4    1.20    0.34
   6  14   5   -0.26    0.34
  -5  11   3  189.50    1.58
  -3  13   6    4.06    0.71
  -3  15   2    3.21    0.55
  -3  15   3   13.00    0.76
  -2   7   8   12.40    0.56
  -2  15   5   43.21    1.02
  -2  16   2    7.23    0.57
  -1  12   8    8.49    0.87
   0  14   7   10.10    0.73
   0  15   6    2.45    0.61
   0  16   5    1.72    0.60
   0  17   3   22.87    0.68
   1  14   7    1.89    0.62
   2  12   8   61.62    1.14
   2  14   7    5.17    0.65
   3  11   8   45.52    0.98
   3  15   6    5.34    0.54
   3  16   5   -0.06    0.43
   5  15   5    1.49    0.35
  -5  10   5   27.87    0.75
  -4   9   7   41.79    0.88
  -4  10   7   14.40    0.72
  -4  13   5   19.94    0.90
  -3   8   8   13.11    0.63
  -3  10   8  150.10    1.64
  -2   6   8   47.66    0.78
  -2  16   3    3.99    0.55
  -1  14   7    1.69    0.68
  -1  15   6   -0.26    0.60
  -1  17   1   10.77    0.51
   1   5   8   99.91    0.99
   1  17   4    4.31    0.47
   2  17   4    0.45    0.35
  -4   7   7  378.79    1.99
  -4  11   7    4.26    0.81
  -3   7   8  195.35    1.52
  -3  11   8    4.84    0.82
  -3  15   4    7.27    0.65
  -1   8   9   29.28    0.87
  -1  10   9    0.68    0.75
  -1  17   2    0.34    0.39
   0   8   9  109.83    1.29
   0   9   9    6.45    0.66
   0  13   8    2.80    0.65
   1   9   9  104.82    1.31
   1  10   9    5.18    0.73
   1  13   8    1.22    0.61
   3  12   8   12.11    0.72
   3  14   7    1.70    0.49
   3  17   4    3.41    0.29
  -5   9   6   49.52    0.89
  -5  12   4    8.41    0.65
  -4  13   6   51.49    1.15
  -3  14   6  113.33    1.42
  -2   9   9   20.98    0.88
  -2  14   7    1.64    0.69
  -2  15   6   17.37    0.83
  -2  16   4   71.48    1.04
  -1   7   9    5.23    0.61
  -1  11   9   85.54    1.36
  -1  13   8    0.17    0.69
  -1  17   3    3.67    0.46
   0   7   9    2.87    0.49
   0  11   9   23.38    0.87
   0  17   4    5.81    0.44
   1   7   9    5.37    0.63
   2  13   8    1.85    0.55
   4  15   6    8.22    0.44
  -5  11   6    6.67    0.64
  -4   6   7   55.86    0.78
  -4   8   8   78.31    1.13
  -4  10   8   51.88    1.11
  -4  12   7   37.71    1.00
  -3   6   8   33.53    0.68
  -3  12   8    6.66    0.76
  -3  15   5   22.55    0.79
  -2   7   9   60.58    1.00
  -2   8   9    0.32    0.53
  -2  10   9    8.11    0.74
   0  15   7   51.17    0.94
   0  16   6   43.81    0.81
   1  16   6   23.43    0.65
   2   8   9   38.91    0.84
   2  10   9   14.74    0.67
   2  15   7   31.03    0.72
  -5   8   7   57.39    0.96
  -5   9   7   34.01    0.84
  -5  10   7    2.37    0.66
  -4   7   8  116.62    1.24
  -4  11   8   42.43    1.13
  -3   8   9    1.85    0.64
  -3  14   7    5.06    0.80
  -2  11   9    7.46    0.75
  -2  16   5    9.55    0.60
  -1   6   9   73.45    0.96
  -1  14   8   62.44    1.11
  -1  15   7   16.38    0.71
  -1  16   6   57.40    0.94
   0  12   9    3.94    0.68
   0  14   8   11.08    0.68
   1  12   9    4.05    0.71
   1  14   8   20.72    0.72
   2   7   9    9.10    0.53
   2  11   9   15.64    0.69
   2  17   5   22.14    0.53
   3  13   8    2.79    0.47
   3  16   6    8.15    0.44
   4  14   7    1.99    0.37
   5  13   7    7.15    0.44
  -5  12   6    4.53    0.66
  -4  14   6   21.57    0.89
  -3   7   9  147.35    1.42
  -3  11   9   31.29    1.05
  -3  15   6    0.24    0.62
  -3  16   3   12.03    0.57
  -2   6   9   39.58    0.77
  -2  15   7   19.33    0.80
   0  17   5   38.23    0.67
   2  14   8    9.63    0.60
   3  10   9   14.30    0.67
   3  15   7   12.40    0.50
  -6   8   4   94.87    1.01
  -6   9   4   13.71    0.52
  -6   9   5  129.42    1.29
  -5   7   7  183.76    1.43
  -4   6   8  186.98    1.41
  -4  12   8   79.15    1.27
  -4  15   4   14.55    0.71
  -3  16   4   31.85    0.74
  -2  14   8   23.28    0.83
  -2  17   3    3.35    0.41
  -1   9  10   17.96    0.83
  -1  13   9   17.26    0.80
   0   5   9   51.91    0.81
   0  13   9    7.92    0.65
   1  13   9   22.31    0.77
   2  12   9    5.90    0.56
  -6   8   5   28.11    0.63
  -5   6   7   38.21    0.74
  -5   8   8  113.89    1.30
  -5  12   7  106.40    1.37
  -4   9   9  132.30    1.48
  -4  10   9    1.97    0.67
  -4  15   5   23.58    0.80
  -3   6   9  104.02    1.12
  -3  16   5    1.24    0.52
  -2  10  10   25.21    0.97
  -2  13   9   76.35    1.21
  -2  16   6   28.05    0.69
  -1   8  10    3.31    0.60
  -1  10  10   17.49    0.81
  -1  17   5    4.32    0.41
   0   9  10   67.41    1.10
   0  10  10  161.46    1.59
   0  15   8    5.11    0.54
   0  16   7   -0.19    0.44
   1   9  10    1.19    0.61
  -6   7   5   59.01    0.79
  -6  11   5    9.16    0.63
  -5  11   8    1.33    0.70
  -5  14   4  172.62    1.54
  -4   7   9   15.42    0.64
  -4  11   9   38.65    1.02
  -4  14   7    0.90    0.57
  -3  14   8   10.79    0.72
  -3  15   7   15.54    0.70
  -2   5   9   43.42    0.74
  -2   8  10    3.71    0.60
  -1   7  10    9.42    0.60
  -1  15   8    1.63    0.49
  -1  16   7   -0.44    0.45
   0   7  10   10.39    0.59
   1  15   8    0.52    0.37
   1  17   6    4.53    0.35
   2  16   7    0.94    0.34
   3  12   9    0.07    0.46
  -6   9   7   22.65    0.80
  -6  11   6    1.41    0.54
  -5  12   8   19.03    0.91
  -5  14   5   28.89    0.80
  -4   5   8   72.11    0.87
  -4  15   6    4.68    0.63
  -3   8  10    8.46    0.66
  -3   9  10   21.29    0.83
  -3  13   9   73.87    1.18
  -2   7  10    5.58    0.59
  -2  15   8   29.20    0.80
  -1  12  10   14.19    0.75
  -1  14   9    2.46    0.55
   0  12  10   27.09    0.84
   0  14   9   15.13    0.64
   0  17   6    4.32    0.36
   1  11  10    0.86    0.51
   2  15   8    1.53    0.37
   4  15   7    2.85    0.29
  -6   8   7   71.86    1.01
  -5   6   8  128.25    1.19
  -5   8   9    1.06    0.64
  -5   9   9   47.64    1.01
  -5  10   9   21.84    0.85
  -5  14   6   18.89    0.80
  -3   5   9  147.46    1.26
  -3   7  10    0.42    0.51
  -3  11  10   25.27    0.90
  -3  16   6   11.36    0.57
  -2   6  10   19.23    0.73
  -2  12  10  107.60    1.38
  -2  14   9    5.47    0.58
  -2  16   7    2.81    0.44
  -1   4   9   13.68    0.51
  -1   6  10    3.96    0.48
  -1  17   6    8.72    0.43
   0   4   9    8.23    0.44
   0   6  10   36.61    0.76
   1  12  10    5.97    0.60
   1  14   9    2.83    0.46
   2  10  10   80.58    1.08
  -6   7   7   79.31    0.99
  -5  11   9   53.58    1.10
  -4   8  10  174.25    1.63
  -4   9  10    0.44    0.64
  -4  10  10   25.28    0.91
  -4  13   9    5.56    0.80
  -4  15   7   49.10    0.95
  -3  12  10   62.37    1.15
  -3  14   9    1.63    0.67
  -3  15   8    0.66    0.57
  -1  13  10    8.73    0.70
   0  13  10    3.46    0.58
   2  11  10   18.04    0.67
  -6   8   8  112.67    1.27
  -6  10   8   29.15    0.85
  -6  12   7    4.46    0.67
  -5  13   8   15.37    0.77
  -5  14   7    5.94    0.62
  -4  16   5    3.00    0.48
  -3   6  10  264.96    1.79
  -2   9  11   37.93    1.02
  -2  10  11    3.10    0.76
  -2  13  10    5.55    0.64
  -2  17   6    0.12    0.34
  -1   5  10   37.43    0.77
  -1   9  11   38.08    1.00
  -1  16   8    6.03    0.46
   0  16   8    1.50    0.37
   2  14   9    1.06    0.28
   2  14   9    0.33    0.18
  -6   6   7    8.21    0.45
  -6   7   8    5.72    0.52
  -5   5   8  401.41    1.95
  -5   6   9    2.32    0.55
  -5   9  10    4.90    0.79
  -5  15   5   32.95    0.76
  -4   5   9   27.11    0.64
  -4  12  10  101.65    1.37
  -3   9  11    5.83    0.80
  -3  10  11    5.77    0.81
  -3  13  10   13.96    0.73
  -2   5  10   71.18    0.94
  -2   8  11   28.61    0.84
  -2  11  11   46.16    1.05
  -2  15   9    7.13    0.55
  -1   8  11    5.43    0.65
  -1  11  11   19.92    0.81
  -1  15   9    2.83    0.43
   0   5  10   11.89    0.51
   0   8  11    4.15    0.68
   0  10  11    3.36    0.59
   0  15   9    2.75    0.39
   1  13  10   20.94    0.62
   1  16   8   10.66    0.39
  -7   9   6    4.23    0.60
  -7  10   6  167.18    1.53
  -6   8   9   21.86    0.83
  -6   9   9   47.92    1.00
  -6  13   7    2.70    0.68
  -5   8  10  120.68    1.41
  -5  10  10   82.44    1.28
  -5  11  10    4.32    0.81
  -5  13   9    5.92    0.77
  -5  14   8    3.31    0.66
  -5  15   6    1.64    0.54
  -4   6  10   22.27    0.68
  -4  14   9    0.31    0.57
  -4  15   8   10.43    0.63
  -4  16   6    3.92    0.43
  -3   8  11    3.44    0.66
  -3  17   5   22.49    0.51
  -2   7  11    2.59    0.57
  -2  16   8    6.50    0.43
  -1   7  11   12.27    0.64
  -1  14  10    6.85    0.49
  -1  17   7    4.78    0.31
   0  11  11    7.03    0.57
   1  15   9    4.38    0.37
  -7   8   6  128.27    1.23
  -7   9   7    2.88    0.64
  -6   6   8   43.20    0.78
  -6  11   9    5.18    0.68
  -5   7  10    9.31    0.65
  -4   8  11   10.99    0.82
  -4   9  11   38.56    0.99
  -4  10  11   16.15    0.81
  -4  13  10    3.38    0.63
  -3   7  11   24.37    0.78
  -3  12  11   14.15    0.83
  -3  15   9   32.80    0.71
  -2  12  11    0.37    0.58
  -1  12  11    5.81    0.59
   0  12  11    5.49    0.58
   0  14  10   16.87    0.55
   1   8  11    5.44    0.60
   1  10  11   24.65    0.70
   2  13  10    0.30    0.35
  -7   7   5   82.12    0.94
  -7   7   6   19.68    0.62
  -7   8   7  125.02    1.27
  -7  11   7   65.95    1.13
  -6   7   9   94.68    1.17
  -6  13   8   28.85    0.84
  -6  14   6   21.69    0.72
  -5   5   9   18.05    0.57
  -5  15   7   34.82    0.75
  -4   5  10   11.70    0.61
  -4   7  11  188.46    1.71
  -4  16   7    3.64    0.44
  -3  14  10   38.24    0.80
  -3  16   8   16.32    0.50
  -3  17   6    4.16    0.33
  -2   6  11    1.51    0.51
  -2  17   7   29.50    0.53
  -1   4  10   17.31    0.57
  -1   6  11    1.49    0.50
   1  14  10   15.36    0.48
  -7   7   7   11.37    0.54
  -7   8   8  198.77    1.67
  -7   9   8   26.61    0.80
  -7  10   8    3.64    0.61
  -7  12   6   86.44    1.18
  -6   6   9   62.23    0.98
  -6   8  10   16.34    0.87
  -6   9  10    0.70    0.64
  -6  10  10  106.98    1.40
  -6  14   7    5.23    0.63
  -5   9  11   48.58    1.06
  -5  10  11    3.73    0.82
  -5  14   9   11.78    0.68
  -4  12  11    3.23    0.66
  -4  15   9   21.03    0.66
  -3   6  11   12.36    0.65
  -2  13  11    2.30    0.50
  -1  13  11    3.76    0.46
  -1  16   9    0.60    0.31
  -5  13  10    2.07    0.60
  -5  15   8    1.87    0.52
  -4   6  11    0.89    0.61
  -4  14  10   33.75    0.77
  -3   9  12    6.74    0.77
  -3  13  11   20.34    0.72
  -2   5  11   11.81    0.62
  -2  10  12   14.57    0.71
  -2  15  10    4.47    0.44
  -2  16   9    7.74    0.41
  -1  10  12    5.11    0.66
  -7   6   6  281.44    1.62
  -7   6   7   84.75    1.01
  -7   9   9   39.32    0.92
  -7  10   9    6.27    0.67
  -7  11   9    4.13    0.79
  -6  12  10   10.62    0.74
  -6  14   8   34.57    0.80
  -5   4   9   73.14    0.93
  -5   5  10    4.31    0.55
  -5   7  11   29.35    0.86
  -5  12  11   29.37    0.92
  -4   9  12   38.50    1.05
  -4  13  11   39.99    0.86
  -3   5  11   99.61    1.20
  -3   8  12   39.12    0.93
  -3  11  12    4.54    0.65
  -2  11  12    2.42    0.55
  -1   5  11    5.03    0.48
  -1   8  12  111.00    1.28
   0  15  10    0.39    0.28
  -7   6   8  145.84    1.34
  -7   7   9   86.63    1.19
  -7  13   7   43.60    0.93
  -6   5   9  131.77    1.23
  -6   9  11   36.06    0.97
  -6  10  11   19.81    0.93
  -5  14  10    2.41    0.55
  -4   4  10   44.64    0.78
  -4   8  12    5.87    0.69
  -4  11  12   29.99    0.94
  -3   7  12   23.72    0.79
  -3  14  11    1.29    0.49
  -2   7  12    1.32    0.56
  -2  12  12    5.68    0.58
  -2  14  11    1.98    0.39
  -1  14  11    1.00    0.35
  -7   8  10   32.89    0.97
  -7  10  10   33.68    0.95
  -7  12   9    9.89    0.70
  -7  13   8    0.66    0.62
  -6   4   8  345.21    1.80
  -6   8  11   13.66    0.77
  -6  11  11    4.63    0.75
  -6  13  10   26.10    0.82
  -6  15   7   25.96    0.64
  -5   6  11    2.68    0.57
  -5   9  12   12.80    0.78
  -5  13  11   41.97    0.90
  -5  15   9    3.90    0.44
  -4   5  11  106.76    1.20
  -4   7  12   20.55    0.82
  -4  15  10    5.60    0.46
  -3  12  12   11.97    0.64
  -2   3  10  102.80    1.00
  -2   6  12   46.57    0.95
  -1   3  10    8.01    0.40
  -1  12  12    7.93    0.50
   0  11  12   17.28    0.58
   0  14  11   -0.18    0.30
  -8   9   7  328.71    2.05
  -7   5   7   57.88    0.80
  -6   7  11   12.46    0.73
  -5   8  12   18.08    0.83
  -5  11  12    1.01    0.65
  -4  12  12   47.96    0.93
  -4  14  11   14.98    0.56
  -4  16   9    0.70    0.33
  -3   6  12    2.19    0.57
  -2   4  11    1.60    0.42
  -1   4  11    4.31    0.51
  -1   6  12   45.03    0.91
   0   7  12    6.29    0.50
  -8   8   6   64.99    0.92
  -8   8   7    9.44    0.57
  -8   8   8   78.01    1.15
  -8   9   8   15.76    0.68
  -8  10   8   43.88    0.93
  -8  11   7   70.29    1.10
  -7   5   8  200.08    1.46
  -7  12  10   19.26    0.81
  -7  13   9   65.11    1.05
  -7  14   7    1.13    0.48
  -6   6  11    3.79    0.70
  -6  15   8    2.30    0.44
  -5   4  10   86.06    1.02
  -5   5  11   19.80    0.68
  -5  12  12   44.89    0.96
  -4   6  12   10.39    0.66
  -3   4  11   23.17    0.65
  -3  13  12    2.42    0.43
  -2  13  12    0.31    0.38
  -1  13  12    0.50    0.37
  -8   7   6    3.90    0.49
  -8   7   7  196.78    1.51
  -8   8   9  176.11    1.64
  -8   9   9   52.97    1.01
  -8  10   9    1.02    0.72
  -8  11   8   32.75    0.86
  -7   6  10  163.83    1.55
  -7   8  11    3.10    0.67
  -7   9  11   85.35    1.28
  -6   9  12    1.73    0.68
  -6  13  11    2.82    0.59
  -5   3   9   19.51    0.52
  -5   6  12   20.55    0.86
  -5  14  11    9.97    0.54
  -5  15  10    6.44    0.44
  -4   3  10   27.74    0.62
  -4   4  11   22.68    0.67
  -4  10  13    8.82    0.77
  -3   5  12  123.23    1.35
  -3   9  13   19.46    0.75
  -3  10  13    5.73    0.57
  -3  15  11    1.05    0.33
  -2   5  12   38.17    0.86
  -2   9  13   15.61    0.70
  -2  15  11    3.34    0.29
  -8   7   8   28.89    0.74
  -8  12   8    8.72    0.66
  -7   5   9   34.91    0.74
  -7  11  11   54.72    1.06
  -7  13  10    2.64    0.59
  -7  14   8    7.63    0.51
  -6   7  12   31.39    0.91
  -6  11  12   40.16    0.95
  -4   5  12   33.49    0.83
  -4   8  13    0.33    0.59
  -4  11  13   24.90    0.80
  -3   7  13   53.06    1.09
  -3  11  13   15.93    0.63
  -2  11  13    5.03    0.51
  -1   9  13    6.74    0.61
  -1  10  13    1.17    0.54
  -8   6   6   34.65    0.69
  -8   6   8  104.37    1.18
  -8   7   9   71.95    1.08
  -8   9  10    1.89    0.60
  -8  10  10   23.43    0.86
  -8  12   9   -0.22    0.59
  -7  12  11    6.38    0.61
  -7  14   9    0.73    0.48
  -6   4  10   67.64    0.95
  -6   5  11    9.15    0.61
  -6  12  12   19.29    0.74
  -5   4  11    1.84    0.46
  -5   8  13   25.98    0.87
  -5  13  12   24.57    0.66
  -5  16   9    0.35    0.27
  -4   7  13    2.22    0.60
  -3  14  12   15.56    0.46
  -2   3  11  253.03    1.63
  -2   7  13   41.44    0.88
  -2  14  12    1.28    0.30
  -8  11  10    7.43    0.68
  -7   4   8   61.51    0.84
  -7   6  11   12.61    0.70
  -7   8  12   52.56    1.09
  -7  10  12    3.56    0.72
  -6  14  11   24.57    0.63
  -5   3  10  132.50    1.19
  -5   5  12   44.03    0.92
  -5   7  13    3.58    0.70
  -5  11  13   48.57    0.94
  -4  12  13    0.09    0.43
  -3   6  13   13.77    0.79
  -2   6  13   11.36    0.71
  -2  12  13    3.97    0.36
  -8   6   9    1.74    0.53
  -8   9  11   10.90    0.74
  -8  12  10   14.04    0.74
  -8  13   8    6.36    0.56
  -7   7  12    8.03    0.82
  -7  11  12    5.17    0.65
  -7  13  11   10.08    0.60
  -6   3   9    6.37    0.42
  -6   8  13    4.21    0.69
  -6  10  13   22.97    0.83
  -6  13  12    0.88    0.50
  -6  15  10    0.83    0.35
  -5  12  13    1.67    0.49
  -5  15  11    9.79    0.41
  -4   3  11   18.41    0.59
  -4   4  12    9.42    0.70
  -4   6  13   81.22    1.18
  -3   4  12   99.62    1.17
  -8   5   7  264.21    1.63
  -8   5   8   48.62    0.84
  -8   6  10   17.81    0.70
  -8  11  11   44.71    0.93
  -8  13   9    5.00    0.55
  -7   5  11   29.07    0.80
  -7  12  12   14.95    0.73
  -7  14  10    2.00    0.39
  -6   4  11   13.15    0.62
  -6   5  12   11.91    0.68
  -6   7  13    3.26    0.68
  -6  11  13   23.17    0.76
  -5  14  12    3.78    0.38
  -4   2  10   24.31    0.57
  -4  13  13    8.22    0.46
  -3  13  13    6.60    0.40
  -2  13  13    4.82    0.35
  -1   6  13    3.09    0.55
  -9   8   7    7.76    0.61
  -9   8   8   82.38    1.16
  -9   9   9  147.16    1.51
  -9  10   8    6.06    0.66
  -8   5   6   17.50    0.50
  -8   5   9  100.44    1.16
  -7   6  12   32.48    0.91
  -7  10  13   30.87    0.94
  -6   3  10   40.45    0.75
  -6  12  13   23.41    0.73
  -5   3  11    6.16    0.48
  -5   9  14   15.29    0.81
  -5  13  13   10.05    0.50
  -4   5  13   34.80    0.87
  -4   8  14   82.50    1.15
  -3   5  13   14.03    0.65
  -3   8  14    3.80    0.65
  -3   9  14    4.35    0.54
  -3  10  14    1.86    0.50
  -2   5  13    3.65    0.62
  -9   9  10    1.97    0.73
  -9  11   9    6.04    0.64
  -8   5  10   10.44    0.67
  -8   6  11   20.42    0.79
  -8   8  12    7.86    0.73
  -8  10  12   57.16    1.06
  -8  12  11   22.23    0.72
  -8  13  10    8.69    0.52
  -7   3   8   69.98    0.86
  -7  11  13   10.52    0.70
  -6   6  13   24.93    0.86
  -5   2  10   28.55    0.69
  -5   5  13    4.47    0.61
  -5   8  14   77.97    1.18
  -5  10  14   97.42    1.17
  -4  11  14    5.14    0.46
  -3  11  14    0.33    0.40
  -2   8  14    3.65    0.57
  -2   9  14    3.40    0.49
  -2  10  14    5.18    0.50
  -9   7   7  143.67    1.32
  -9  11  10    2.69    0.62
  -8   7  12   46.27    1.04
  -7   3   9    5.87    0.44
  -7   5  12    1.60    0.60
  -7   7  13    7.60    0.73
  -7  13  12    4.04    0.45
  -7  14  11    0.31    0.34
  -6   4  12    9.16    0.62
  -6  10  14   37.02    0.91
  -6  15  11    9.07    0.36
  -5  11  14    0.95    0.47
  -3   2  11   17.69    0.55
  -2   3  12    3.98    0.53
  -2   7  14    2.52    0.58
  -9   6   8   25.95    0.78
  -9   6   9   23.65    0.80
  -9   7  10  295.55    2.05
  -9   8  11   18.32    0.85
  -9  10  11    6.89    0.75
  -9  12   9    0.93    0.52
  -8   4   7   34.78    0.66
  -8   4   8   45.01    0.76
  -8   4   9   47.81    0.88
  -8   6  12    7.73    0.81
  -8  13  11    4.28    0.49
  -8  14   9    1.81    0.37
  -7  12  13    5.06    0.49
  -7  15  10    2.45    0.30
  -6   3  11   31.97    0.74
  -6   5  13   29.58    0.87
  -6  11  14    7.88    0.61
  -6  13  13    4.39    0.41
  -5   6  14    4.52    0.75
  -5  12  14    7.11    0.47
  -4   2  11    6.00    0.44
  -4   4  13    0.89    0.51
  -4   6  14   33.71    0.86
  -4  12  14    9.82    0.43
  -4  14  13    1.41    0.26
  -3   4  13    5.48    0.55
  -3  12  14    1.33    0.31
  -9   6   7    7.76    0.52
  -9   7  11   43.75    1.04
  -9  11  11   13.36    0.70
  -9  12  10    5.67    0.57
  -8   4  10  131.43    1.36
  -8   9  13   20.02    0.83
  -8  10  13    4.48    0.60
  -8  14  10   17.65    0.50
  -7   3  10    3.68    0.46
  -7   8  14    9.84    0.84
  -7   9  14   18.57    0.78
  -7  10  14   12.93    0.73
  -5   2  11    2.09    0.50
  -5   3  12    8.21    0.59
  -5   4  13    0.96    0.53
  -2   4  13    5.80    0.51
  -9  10  12   11.62    0.76
  -8   7  13   64.38    1.16
  -8  11  13    8.78    0.58
  -7   5  13   11.76    0.85
  -7  14  12    7.81    0.39
  -6   6  14   10.12    0.73
  -6  12  14   14.52    0.51
  -4   1  10   67.69    0.84
  -4   5  14    5.49    0.72
  -3   5  14   17.48    0.75
  -9   5   8    3.25    0.47
  -9   5   9  137.07    1.35
  -9   6  11   40.00    0.94
  -9   7  12   19.39    0.82
  -9  11  12   30.51    0.81
  -9  12  11    8.10    0.56
  -8   4  11    0.88    0.53
  -8   5  12   89.70    1.27
  -8   6  13    5.58    0.82
  -8  13  12    0.37    0.36
  -7   3  11   44.06    0.87
  -7  11  14   22.48    0.65
  -7  13  13   15.91    0.48
  -6   3  12    9.19    0.60
  -6  14  13    2.81    0.28
  -5   5  14    1.52    0.57
  -5   8  15    4.80    0.63
  -5   9  15   30.30    0.75
  -5  10  15    1.49    0.47
  -4   8  15   17.06    0.71
  -4   9  15    5.39    0.50
  -4  10  15    0.38    0.45
  -4  13  14    0.14    0.20
  -4  13  14   -0.15    0.12
  -9   5   7    5.56    0.45
  -9   5  10   21.99    0.76
  -9  13  10    2.81    0.41
  -8   3   8   69.78    0.90
  -8   3   9  365.95    2.00
  -8  10  14    4.30    0.65
  -8  12  13    1.48    0.42
  -7   6  14   11.86    0.76
  -7  12  14   39.28    0.71
  -6   2  11   92.80    1.09
  -6   5  14    9.66    0.71
  -6   8  15    3.61    0.60
  -6   9  15   18.39    0.68
  -5   7  15   46.48    0.93
  -4   7  15   45.49    0.89
  -4  11  15    5.39    0.40
  -3   3  13   28.26    0.73
  -3   8  15   -0.26    0.44
  -3   9  15    3.01    0.43
 -10   8  10  272.01    1.94
 -10  10  10   40.13    0.91
  -9   5  11   83.35    1.20
  -9   9  13   21.27    0.80
  -9  10  13    1.41    0.54
  -9  12  12   11.13    0.55
  -8   3  10   11.43    0.57
  -7   2  10  215.17    1.55
  -7   4  13   -0.64    0.60
  -6   7  15   23.07    0.81
  -6  13  14    5.95    0.34
  -5   4  14   13.83    0.79
  -5  11  15    6.99    0.41
  -4   1  11  150.65    1.28
  -4   4  14    3.46    0.63
  -3   7  15    4.46    0.50
 -10   7   8    3.52    0.63
 -10   7   9    7.90    0.60
 -10   7  10    9.40    0.65
 -10   8  11   12.56    0.73
 -10   9  11   11.79    0.68
 -10  10  11    5.50    0.63
 -10  11  10    2.93    0.53
  -9   4   9   78.63    1.05
  -9   4  10   21.10    0.79
  -9  11  13    2.91    0.51
  -9  13  11   10.78    0.46
  -8   3  11   10.24    0.68
  -8   6  14    9.13    0.85
  -8  11  14    0.62    0.43
  -7   5  14   36.43    0.96
  -7   8  15    0.96    0.60
  -6   3  13    2.23    0.57
  -4   6  15    0.48    0.53
  -3   4  14   16.51    0.67
 -10   6  10  300.37    2.09
 -10   7  11   12.18    0.72
 -10   9  12   10.11    0.76
  -9   4   7    6.88    0.51
  -9   5  12   15.17    0.78
  -9   6  13    5.94    0.72
  -8  13  13    6.95    0.33
  -7   2  11  190.43    1.55
  -7   7  15    9.59    0.71
  -7  11  15   16.54    0.56
  -7  13  14    3.72    0.31
  -6   1  10   30.48    0.66
  -6   2  12   62.51    0.98
  -6   4  14   83.76    1.22
  -5   1  11   74.44    0.96
  -3   6  15    2.74    0.48
 -10   6   8   83.64    1.09
 -10   6  11   38.66    0.95
 -10   7  12    5.25    0.68
 -10  10  12   14.09    0.61
  -9   4  11    2.95    0.59
  -9   8  14   10.04    0.72
  -9   9  14    3.32    0.59
  -9  10  14    7.29    0.61
  -8   2   8  121.68    1.17
  -8   2   9   35.74    0.78
  -8   4  13    5.56    0.69
  -8   5  14    5.12    0.81
  -8   9  15    3.82    0.56
  -8  12  14   29.61    0.58
  -7   3  13   14.51    0.73
  -7   4  14   64.15    1.20
  -4   2  13   70.08    1.06
 -10   5   9   98.98    1.25
 -10   5  10   42.54    0.99
 -10   8  13   33.91    0.95
 -10   9  13   10.64    0.70
 -10  11  12   11.89    0.58
  -9   4  12  152.91    1.58
  -9   5  13   99.74    1.36
  -9  11  14    0.67    0.45
  -9  13  12    4.36    0.33
  -8   2  10   14.25    0.59
  -8   7  15   20.23    0.78
  -8  10  15   10.39    0.55
  -7   1   9   80.73    0.95
  -7   2  12  102.69    1.24
  -6   1  11   17.86    0.60
  -5   2  13   19.36    0.71
  -5   8  16   47.54    0.83
  -5   9  16    5.38    0.46
  -4   1  12   12.25    0.55
  -4   3  14   26.79    0.75
  -3   1  12    6.07    0.50
  -3   2  13    1.07    0.46
  -3   5  15   68.40    1.00
 -10   5  11   67.60    1.13
 -10  10  13    9.55    0.58
 -10  12  11    0.80    0.38
  -9   3   8  154.07    1.33
  -9   3   9  135.24    1.31
  -9   3  10    8.59    0.60
  -8   2  11    7.03    0.66
  -8   6  15    3.22    0.68
  -8  11  15   13.80    0.51
  -6   2  13   11.04    0.64
  -6   3  14    3.76    0.60
  -6   7  16   25.78    0.80
  -6   8  16   31.58    0.72
  -6   9  16    0.63    0.40
  -6  10  16    6.64    0.43
  -5   0  10   57.09    0.81
  -5   1  12    1.71    0.47
  -5   4  15   21.42    0.85
  -5   7  16    0.14    0.54
  -5  10  16    3.81    0.37
  -4   9  16    1.62    0.37
  -3   3  14   25.36    0.70
 -10  11  13    9.28    0.52
  -9   3   7    3.10    0.45
  -9   3  11   33.94    0.85
  -9   4  13    5.46    0.80
  -9   5  14    1.18    0.81
  -9   9  15   15.84    0.70
  -8   4  14   27.84    0.91
  -7   3  14   -0.08    0.72
  -7   7  16   19.11    0.76
  -7   8  16   10.00    0.57
  -7   9  16    0.80    0.43
  -5   6  16   21.70    0.75
  -4   7  16    2.69    0.44
  -4  10  16    2.28    0.30
 -11   8  11    9.59    0.74
 -11   9  10   21.61    0.75
 -11   9  11   49.47    0.94
 -10   4   9   15.54    0.74
 -10   4  10   63.23    1.10
 -10   7  14   10.05    0.80
 -10   8  14   28.89    0.80
 -10   9  14    3.25    0.54
 -10  12  12   10.06    0.41
  -9   3  12   22.53    0.81
  -9   7  15    9.23    0.69
  -9  10  15    2.44    0.42
  -9  12  14    0.62    0.32
  -8   2  12   62.50    1.06
  -7   1  11   25.68    0.70
  -7   2  13    4.47    0.62
  -7  10  16    2.77    0.37
  -6   0  10  540.36    2.36
  -6   6  16   31.97    0.81
  -6  11  16    1.42    0.29
  -4   6  16    3.40    0.55
 -11   7   9  101.54    1.24
 -11   7  10   65.36    1.06
 -11   8  12   14.10    0.76
 -11  10  11   27.62    0.70
 -10   4   8    2.32    0.54
 -10   5  13   10.89    0.75
 -10  10  14   15.05    0.57
  -9   6  15    8.60    0.70
  -8   1   9  144.29    1.33
  -8   7  16   26.60    0.77
  -8   8  16    3.09    0.52
  -7   6  16   44.45    0.92
  -5   2  14   18.01    0.71
  -5   5  16    1.50    0.59
  -4   1  13   39.81    0.87
  -4   2  14   53.39    0.99
 -11   6  11    0.36    0.69
 -11  10  12   51.06    0.84
 -10   4  12   36.62    0.95
 -10   6  14    6.13    0.73
 -10  11  14   -0.21    0.36
 -10  12  13   11.44    0.41
  -9   2   8    4.62    0.50
  -9   2  10   16.24    0.65
  -9   3  13  150.90    1.60
  -9   4  14    3.92    0.70
  -8   1   8  318.57    1.79
  -8   1  10   22.95    0.67
  -8   3  14    1.47    0.66
  -8   4  15   19.82    0.83
  -8   6  16    7.25    0.72
  -8  10  16   12.75    0.46
  -7   5  16    0.76    0.67
  -6   1  13    4.41    0.69
  -6   2  14   21.71    0.78
  -6   3  15    5.79    0.65
  -5   3  15    2.89    0.55
  -4   3  15    6.98    0.67
  -4   5  16    8.76    0.57
  -3   1  13  208.79    1.57
 -11   6   9   36.20    0.81
 -11   7  13   98.57    1.31
 -11   8  13    8.68    0.62
 -11   9  13    1.17    0.49
 -10   4  13    1.54    0.77
 -10   7  15   16.43    0.79
 -10   8  15   -0.18    0.49
 -10   9  15    3.03    0.52
  -8   1  11  141.22    1.40
  -7   0  10  172.73    1.43
  -7   2  14   79.10    1.20
  -7   3  15   40.21    1.04
  -5   0  12   33.10    0.80
  -4   0  12   31.82    0.70
  -3   0  12   27.81    0.70
 -11   5  10    1.30    0.59
 -11  10  13   19.28    0.60
 -11  11  12    0.59    0.35
 -10   3   9    3.26    0.53
 -10   3  11   19.56    0.75
 -10  10  15    2.58    0.41
  -9   2   7   63.63    0.85
  -9   2  12   17.51    0.76
  -8   1  12    3.34    0.69
  -8   5  16    2.70    0.62
  -8  11  16    0.06    0.19
  -8  11  16   -0.06    0.13
  -6   4  16    1.55    0.57
  -6   7  17    5.51    0.49
  -6   8  17    4.65    0.41
  -6   9  17    1.92    0.32
  -5   4  16   62.48    1.01
 -11   5   9   57.67    0.97
 -11   5  12    2.41    0.65
 -11   7  14   37.71    0.87
 -11   8  14   10.42    0.57
 -11   9  14    1.22    0.52
 -10   3   8    2.40    0.45
 -10   3  12   52.20    1.05
  -8   2  14    3.04    0.66
  -8   3  15   24.44    0.86
  -7   4  16    3.37    0.61
  -7   7  17   12.36    0.54
  -7   8  17    3.43    0.40
  -7   9  17    0.87    0.31
  -5   1  14   14.82    0.73
  -5   7  17    7.38    0.45
  -5   8  17    1.47    0.31
  -4   4  16   65.50    0.98
 -11   4  10   92.10    1.26
 -11   6  14    6.22    0.66
 -11  10  14   22.20    0.56
 -11  11  13    3.84    0.34
 -10   3  13   43.94    1.02
 -10   5  15   27.41    0.86
  -9   1   9   19.10    0.71
  -9   1  10   35.18    0.80
  -9   2  13   46.18    1.02
  -9   5  16    0.87    0.60
  -8   1  13   94.15    1.33
  -8   4  16    7.12    0.69
  -8   7  17   25.68    0.68
  -8   9  17    3.66    0.37
  -7   0  12   20.50    0.77
  -7   6  17    6.84    0.53
  -6   1  14   16.73    0.73
  -6   2  15    5.48    0.62
  -5   2  15   12.27    0.66
  -5   6  17    0.38    0.41
  -4  -1  11  149.25    1.26
  -4   1  14   41.08    0.84
  -4   2  15   22.77    0.75
  -3  -1  11  260.06    1.61
 -11   4   9   50.23    0.99
 -11   8  15    0.19    0.50
 -10   2  10   19.81    0.73
 -10   2  11   80.69    1.18
 -10   3   7   51.09    0.84
  -9   1   8   24.22    0.67
  -9   1  11   62.77    1.03
  -8   0   8  157.67    1.31
  -8   0  10  165.69    1.44
  -8   6  17    0.55    0.54
  -7   1  14    6.33    0.64
  -7   2  15    6.35    0.65
  -6  -1  10   31.28    0.68
  -6   5  17   30.70    0.76
  -5  -1  11   74.47    0.96
 -12   7  11   15.07    0.73
 -12   7  12   19.38    0.75
 -12   8  11   27.86    0.78
 -12   8  12   96.75    1.15
 -11   4  13    5.31    0.68
 -11   7  15   23.78    0.73
 -10   2   9   25.24    0.72
 -10   2  12   37.28    0.94
 -10   6  16    9.84    0.62
  -9   2  14   47.23    1.05
  -9   4  16   53.32    1.11
  -9   7  17    1.81    0.48
  -8   2  15    1.05    0.74
  -7   5  17   22.45    0.68
  -6  -1  11   19.92    0.63
  -5   5  17    6.67    0.51
 -12   7  13   13.00    0.69
 -12   8  13   17.50    0.67
 -12   9  12   32.65    0.69
 -11   3  11   15.41    0.75
 -11   3  12    8.28    0.77
 -11  10  15    1.73    0.33
 -10   2   8   27.00    0.70
 -10   2  13   27.01    0.90
  -9   1   7   18.84    0.57
  -9   1  13   19.45    0.89
  -8   0  12    3.53    0.57
  -8   1  14   36.11    0.94
  -8   5  17   10.46    0.59
  -7  -1   9   82.78    0.97
  -7  -1  10   21.65    0.64
  -5  -1  12    1.90    0.54
  -4  -1  12   12.03    0.62
 -12   6  13    2.75    0.58
 -12   9  13    7.86    0.48
 -11   3   9   17.32    0.76
  -9   2  15    2.35    0.77
  -9   5  17   24.36    0.77
  -7  -1  11   26.74    0.72
  -7   4  17    0.46    0.47
  -6  -1  12    4.89    0.54
  -6   1  15    2.76    0.58
  -6   4  17    0.20    0.44
  -5   1  15  100.26    1.26
 -12   5  10    3.98    0.63
 -12   5  11    7.19    0.62
 -12   5  13   69.62    1.19
 -12   6  14   21.90    0.81
 -12   7  14   10.53    0.60
 -12   8  14   69.59    0.90
 -12   9  14    3.81    0.41
 -11   6  16   17.54    0.70
 -11   7  16    3.37    0.44
 -11   8  16   15.93    0.51
 -10   1  11   31.23    0.85
 -10   2   7   43.21    0.80
 -10   2  14   55.86    1.12
 -10   4  16    4.55    0.64
 -10   8  17    0.00    0.37
  -9   0  10    5.65    0.54
  -9   1  14    8.50    0.83
  -8   4  17    0.59    0.50
  -7   1  15    8.64    0.65
  -6   0  14   23.09    0.76
  -5   0  14    7.54    0.59
  -5   4  17    1.74    0.41
  -4   1  15   38.75    0.87
 -11   2  11    1.00    0.74
 -11   3   8    0.37    0.53
 -11   4  15   -0.42    0.63
 -11   9  16    0.32    0.30
 -10   1   9   51.41    0.91
 -10   1  12    5.68    0.67
 -10   9  17    4.20    0.32
  -9   0   8    3.06    0.47
  -9   0  12  111.67    1.36
  -9   4  17    0.92    0.59
  -8  -1   9  141.78    1.32
  -8  -1  10   23.23    0.74
  -8   1  15   17.95    0.80
  -8   7  18    0.77    0.33
  -7   0  14    3.09    0.62
  -7   7  18    1.70    0.28
  -5  -1  13   17.80    0.77
 -12   4  10    7.48    0.70
 -12   5  14   14.67    0.69
 -12   6  15    0.26    0.53
 -12   7  15    3.55    0.48
 -11   2  12   39.36    0.97
 -11   2  13    1.11    0.77
 -11   5  16    3.48    0.57
 -10   1   8    7.62    0.58
 -10   1  13   70.24    1.20
 -10   5  17   24.83    0.70
  -8  -1   8  308.34    1.79
  -8  -1  11  139.59    1.41
  -8   0  14   87.07    1.27
  -8   6  18   10.44    0.49
  -8   8  18    2.28    0.23
  -7   3  17    5.30    0.55
  -6  -2  10   59.32    0.88
  -6  -1  13    4.47    0.58
  -6   3  17   13.17    0.59
  -6   6  18   14.70    0.45
  -4  -2  11    6.66    0.52
  -4  -1  13   38.86    0.82
 -12   4  14   22.40    0.85
 -12   5  15   35.11    0.88
 -11   2   9   63.89    1.03
 -11   3  15    3.64    0.69
 -11   4  16    1.80    0.63
  -9   1  15   48.43    1.06
  -9   6  18    3.48    0.41
  -9   7  18    0.19    0.29
  -9   8  18   11.65    0.37
  -8  -1  12    4.21    0.58
  -8   5  18    0.27    0.44
  -7  -1  13   49.72    0.97
  -5   3  17   82.56    1.00
 -12   3  12    5.14    0.69
 -11   6  17    0.41    0.40
 -11   7  17   12.07    0.45
 -11   8  17    1.61    0.32
 -10   4  17   -0.27    0.53
  -9   3  17    9.28    0.63
  -7  -2  10  202.13    1.56
  -6   5  18    0.39    0.32
 -13   7  13   11.12    0.56
 -12   3  10   33.44    0.92
 -12   4  15    4.57    0.62
 -12   6  16    5.68    0.47
 -12   7  16   17.00    0.52
 -11   1  11   10.94    0.69
 -11   1  12    2.12    0.65
 -11   2   8   12.81    0.64
 -11   5  17    0.91    0.47
 -10   0  10   42.28    0.90
 -10   1   7   78.71    0.97
 -10   2  16   46.56    1.02
 -10   7  18    3.42    0.33
  -9  -1  10   35.58    0.81
  -9  -1  11   63.25    1.07
  -9   5  18    2.80    0.40
  -8  -1  13   91.88    1.27
  -8   2  17    1.97    0.64
  -8   4  18   22.36    0.65
  -7  -1  14    5.24    0.73
  -7   2  17    0.00    0.47
  -7   4  18   37.70    0.71
  -6  -2  12   63.63    1.01
  -6  -1  14   15.53    0.69
  -6   2  17   15.69    0.69
  -5  -2  12   22.71    0.68
  -5  -1  14   15.39    0.72
 -13   6  12    5.54    0.53
 -13   6  13   38.34    0.78
 -12   3  14    3.87    0.66
 -11   1  10   20.26    0.75
 -10   6  18    1.27    0.34
  -9  -1   9   18.70    0.64
  -9  -1  12    3.06    0.62
  -9   4  18    6.30    0.51
 -13   5  12   31.34    0.79
 -13   5  13   55.64    0.92
 -13   6  14    5.72    0.49
 -11   1  14    2.70    0.71
 -11   4  17    4.18    0.51
 -10   0  14   45.72    1.06
 -10   5  18   12.97    0.49
  -9  -1   8   23.67    0.63
  -8  -2  10   14.62    0.63
   7  -6  -8  144.73    2.65
   8  -3  -7   18.17    1.36
   9  -9  -8   22.57    2.34
   9  -6  -8   28.97    2.21
   9  -2  -6  161.92    2.92
  10  -7  -8    4.49    1.81
  10  -4  -7   23.05    2.17
  11 -10  -7    6.24    2.15
  11  -5  -7    8.63    2.01
  11  -1  -2    8.72    1.85
  12 -13  -2   -0.13    0.42
  13 -11  -2    2.10    1.13
  13  -9  -5   16.31    1.94
  13  -8  -5   12.49    2.42
  13  -7  -5    2.58    2.39
   7  -8  -8  175.48    2.98
   8  -8  -8   74.95    2.61
   8  -7  -8   27.30    2.09
   8  -6  -8   94.69    2.44
   9 -13  -6    0.75    1.32
   9  -7  -8   13.50    1.83
  10 -14  -4   15.00    1.38
  11  -6  -7   52.30    2.93
  12 -12  -4    1.78    1.28
  12 -11  -5    1.95    1.71
  12  -4  -5   12.26    2.20
   9  -4  -7    4.26    1.43
  10  -5  -7   32.77    2.41
  10  -3  -6   11.42    1.63
  11 -13  -4    1.15    1.39
  11 -11  -6    3.01    1.92
  11  -4  -6  103.22    2.99
  12  -9  -6    2.29    2.02
  12  -7  -6    0.81    2.07
  12  -6  -6   17.75    2.31
  13 -10  -3    2.98    1.51
  13 -10  -2    5.05    1.60
  13 -10  -1    1.74    1.41
  13  -9  -4    4.53    1.84
  13  -8  -4    3.26    2.25
  13  -7  -4    7.91    2.12
  13  -5  -2    2.34    1.81
   8 -11  -7   63.79    2.55
  10 -13  -5   31.17    1.77
  11 -12  -5    0.09    1.42
  12 -10  -5   25.78    2.46
  12  -5  -5    2.59    2.02
  12  -4  -4   72.50    2.72
  12  -3  -2    2.80    1.74
  12  -3  -1    2.86    2.11
  13  -9  -3    3.91    1.72
  13  -9   0    3.24    1.41
  13  -8  -3    6.68    2.20
  13  -7  -3   89.88    3.18
  13  -6  -2   95.03    3.24
  13  -6  -1    1.46    2.14
   9 -10  -7   25.91    2.34
   9  -5  -7    5.23    1.49
   9  -3  -6   11.10    1.41
   9  -1  -4   21.42    1.37
  10 -14  -3    6.46    1.25
  10  -7  -7   23.20    2.40
  10  -6  -7    3.08    1.77
  11 -13  -3   12.10    1.51
  11 -10  -6   56.87    2.64
  11  -5  -6    4.32    1.92
  12  -9  -5   14.81    2.49
  12  -6  -5    5.36    2.13
  13  -9  -2    7.42    1.65
  13  -9  -1   22.93    1.77
  13  -7  -2    2.24    1.78
   8 -10  -7   15.44    2.05
   8  -5  -7  290.99    3.61
   8  -3  -6    1.06    1.20
   9 -15  -2    0.49    0.92
   9 -14  -4    3.16    1.38
   9 -12  -6    5.24    1.62
   9  -6  -7    4.98    1.76
  10 -11  -6    6.05    2.16
  10  -4  -6   78.56    2.52
  10  -3  -5    7.24    1.70
  10  -1  -2   48.44    1.98
  11  -4  -5    3.77    1.79
  11  -3  -4   42.79    2.19
  12 -11  -3   13.01    1.96
   8 -15  -3    4.41    1.07
   9 -13  -5   33.84    1.86
   9  -9  -7    3.88    1.73
   9  -8  -7    7.97    2.18
  10 -13  -4    0.43    1.66
  10 -12  -5    5.40    1.94
  10  -1  -1   28.10    1.70
  11 -12  -4    9.96    1.66
  11  -8  -6    4.50    2.06
  11  -7  -6   31.56    2.40
  12 -10   2    0.97    1.26
  12  -4  -2    6.56    1.86
  12  -4  -1   13.27    2.25
   7  -9  -7    1.80    1.66
   7  -6  -7   85.04    2.03
   8  -9  -7  303.96    4.04
   8  -8  -7    7.73    1.80
   8  -7  -7  202.19    3.45
   9  -4  -6   11.52    1.44
   9  -1  -3  112.24    2.20
  10 -14  -2    1.16    1.12
  10  -5  -6   21.87    1.93
  11 -13   0   -0.72    1.06
  11 -13   1    0.27    0.75
  11 -13   1   -0.37    0.44
  12 -11  -2   13.76    1.69
  12  -7  -4   14.94    2.18
  12  -6   2   14.44    1.85
   7  -8  -7  128.92    2.56
   7  -7  -7   11.40    1.31
   8 -14  -4   17.15    1.51
   8 -13  -5   22.89    1.69
   9 -15  -1    1.80    0.79
   9  -3  -5  278.35    3.55
   9  -2  -4   12.02    1.47
  10  -9  -6   96.03    3.07
  10  -4  -5   60.71    2.21
  10  -2  -3   55.76    1.95
  11 -12  -3   -0.55    1.42
  12 -10   1    1.73    1.49
  12  -9   2    3.02    1.44
  12  -7   2    0.27    1.68
  12  -6  -3   14.37    2.10
  12  -5   1    6.48    1.73
   8 -15  -2   10.95    1.29
   9 -14  -3    0.97    1.20
   9 -12  -5   16.51    2.18
   9 -10  -6   49.78    2.56
   9  -5  -6   77.87    2.28
  10 -14   0    7.28    1.19
  10 -13  -3   13.71    1.73
  10 -11  -5   41.97    2.33
  10  -8  -6  152.20    3.40
  10  -7  -6   51.45    2.43
  11  -8  -5    4.80    2.03
  11  -7  -5   38.62    2.46
  11  -3  -2   56.20    2.26
  12 -10  -2    2.80    1.75
  12 -10  -1    0.47    1.84
  12  -6   1   14.42    2.25
   9  -1  -2   78.32    1.87
  10 -12  -4   47.28    2.18
  10  -5  -5   93.12    2.63
  11 -12  -2   15.34    1.68
  11 -12   2    8.14    1.17
  11 -10  -4    9.01    2.05
  11  -5  -4   14.46    2.00
  12  -9  -2    0.18    1.87
  12  -9  -1   18.01    2.21
  12  -9   0   -0.30    1.84
  12  -8  -2   77.55    3.03
  12  -8   1    2.33    1.93
   9  -9  -6   28.02    2.02
   9  -4  -5    3.79    1.24
  10 -13  -2    1.30    1.56
  10 -10  -5    0.27    1.81
  10  -2  -1    3.47    1.53
  11 -12  -1    3.79    1.38
  11 -12   0   28.75    1.86
  11 -12   1    2.27    1.18
  11 -11  -3    2.61    1.81
  11  -6  -4  131.20    3.23
  12  -8  -1   18.45    2.07
  12  -7  -1   23.82    2.13
  12  -7   0   14.94    1.87
   8 -13  -4    3.89    1.66
   8  -6  -6   32.98    1.65
   9  -3  -4   38.34    1.61
   9  -2  -3   53.83    1.70
   9  -1  -1   47.06    1.53
  10 -13   3    7.98    0.99
  10 -11  -4    3.76    2.14
  10  -8  -5   66.76    2.82
  11 -11  -2   35.34    2.31
  11  -9   4    0.42    1.32
  11  -8  -4   13.07    2.10
  11  -7  -4    9.67    2.01
  11  -5  -3   30.43    2.08
   7 -15  -2    2.43    1.20
   7 -12  -5    3.79    1.73
   8  -8  -6   66.87    2.21
   8  -4  -5   71.27    1.96
   9  -5  -5   56.93    2.02
  10 -13  -1    6.64    1.33
  11 -11  -1   20.72    2.03
  11 -10   3    1.05    1.47
  11  -6  -3   35.89    2.25
  11  -5  -2   11.42    2.02
  11  -4   0   11.16    1.82
  11  -4   1   35.46    1.99
   6  -9  -6   44.55    1.70
   6  -7  -6   10.51    1.17
   7 -13  -4   16.40    1.79
   9 -14  -1    6.99    1.32
   9 -10  -5   86.43    2.63
  10 -13   0   10.57    1.36
  10 -13   1    0.97    1.36
  10 -13   2    3.72    1.09
  10 -10  -4    7.92    1.90
  10  -5  -4   75.89    2.36
  10  -4  -3   10.34    1.69
  11 -11   0   12.97    1.66
  11 -11   1   13.53    1.50
  11 -10  -2   26.02    2.19
  11  -8  -3    2.50    1.90
  11  -7  -3   15.33    2.06
   6  -8  -6   14.99    1.23
   8 -14  -2   58.12    2.08
   9 -14   0   16.83    1.49
   9 -14   3   -0.52    0.44
   9  -9  -5   83.13    2.57
   9  -8  -5   33.36    2.22
   9  -6  -5    8.75    1.47
   9  -2  -2   35.38    1.47
  10 -12  -2   29.20    1.98
  10 -11  -3   16.19    2.03
  10  -6  -4  221.16    3.60
  10  -3  -1    3.94    1.73
  11 -10  -1    7.25    2.10
  11  -9   3    6.74    1.49
  11  -8   3    4.55    1.84
  11  -6  -2   60.04    2.46
  11  -5   0    1.89    1.97
   6 -14  -3    1.41    1.52
   7 -11  -5   26.58    1.81
   8 -15   1   12.75    1.13
   8 -15   2    1.02    0.99
   8 -13  -3   81.53    2.54
   8 -10  -5   19.38    1.99
   8  -5  -5   59.13    1.78
   9 -14   1   12.03    1.26
   9 -13  -2    2.40    1.43
   9 -12  -3   19.81    2.11
   9 -11  -4   32.86    2.15
   9  -3  -3  100.65    2.15
  10 -12  -1    2.39    1.86
  10 -10   5    3.92    1.38
  10  -8  -4  131.34    3.13
  10  -7  -4   15.25    1.90
  10  -5  -3   98.59    2.68
  10  -3   0    0.86    1.68
  11 -10   0   30.21    2.06
  11 -10   1   19.38    1.79
  11  -9  -1   12.29    2.32
  11  -9   2    3.29    1.88
  11  -8  -2   19.57    2.13
  11  -7  -2    7.77    1.91
  11  -6  -1   17.36    1.86
   6 -16   1    0.61    0.83
   6 -11  -5    7.68    1.36
   8  -9  -5    5.45    1.87
   9  -5  -4   29.68    1.62
   9  -2  -1   81.02    1.87
  10 -12   0   37.89    2.17
  10 -12   2    9.71    1.54
  10 -11  -2    2.79    1.78
  10 -11   4    1.05    1.45
  10  -4  -2  175.04    3.01
  11  -9   0   24.51    2.08
  11  -9   1   44.44    2.19
  11  -8   2    5.59    1.58
  11  -7  -1   23.79    2.05
   7 -14  -2    2.73    1.53
   8 -14  -1    4.65    1.40
   8  -4  -4   37.89    1.45
   9 -13  -1    2.76    1.45
   9  -4  -3    5.01    1.35
   9  -2   0    8.10    1.30
  10 -12   1    0.62    1.42
  10  -9  -3   25.78    2.12
  10  -9   5   19.22    1.75
  10  -8  -3   12.27    2.16
  10  -7  -3   23.36    2.24
  10  -6  -3   16.55    1.76
  10  -4  -1    9.25    1.71
   6 -15  -1    0.90    1.30
   7 -15   0    5.49    1.12
   7  -9  -5  100.24    2.48
   8 -11  -4   38.20    2.05
   9 -12  -2   30.94    2.04
   9  -9  -4  155.22    3.15
   9  -8  -4    8.53    1.89
   9  -7  -4   34.25    1.87
   9  -6  -4   13.30    1.53
  10 -11  -1    3.80    1.79
  10 -11   3   39.53    1.80
  10  -8   5    0.55    1.55
  10  -5  -2   43.41    1.96
  10  -4   0   12.56    1.81
   6 -16   3    0.54    0.75
   6 -12  -4   17.45    1.50
   7  -8  -5   19.81    1.40
   7  -7  -5   78.51    1.89
   8 -14   0   22.89    1.48
   8 -13  -2    5.94    1.62
   8 -10  -4   16.93    1.96
   9 -13   1   19.42    1.61
   9 -13   3   25.73    1.51
   9 -11   6    0.71    1.24
  10 -11   0    8.62    1.76
  10 -11   1   89.26    2.72
  10 -11   2   10.08    1.62
  10  -9  -2   13.85    1.92
  10  -6  -2    4.73    1.61
  10  -5  -1   74.81    2.52
  10  -4   1    3.97    1.45
   5 -16   1    0.64    0.94
   5  -9  -5    9.10    1.16
   6 -14  -2    5.18    1.52
   6  -9  -5  114.41    2.19
   6  -7  -5   53.15    1.59
   7 -15   2    1.58    1.15
   8 -14   3    0.34    1.21
   8 -13   6    0.69    0.58
   9 -12  -1   14.42    1.81
   9  -5  -3   25.36    1.53
   9  -4  -2   31.70    1.71
   9  -3  -1  599.70    4.52
  10 -10   3    2.61    1.75
  10  -8  -2   58.98    2.42
  10  -7  -2   97.48    2.71
  10  -6   4   11.39    1.56
  10  -5   0   33.62    2.06
   5  -8  -5   58.75    1.46
   6 -15   0   20.97    1.60
   7 -14  -1   14.42    1.49
   8 -14   2    2.64    1.14
   8 -13  -1   27.36    1.79
   8  -4  -3    7.49    0.98
   9 -10   6    9.02    1.56
   9  -8  -3    2.58    1.82
   9  -7  -3  183.34    3.24
   9  -6  -3    7.17    1.41
   9  -3   0   13.39    1.44
  10 -10   0   11.34    1.92
  10 -10   1    8.31    1.80
  10 -10   2   44.38    2.14
  10  -9  -1   40.63    2.32
  10  -9   3    1.97    1.84
  10  -8  -1   53.68    2.58
  10  -7  -1   36.94    2.32
  10  -6  -1    2.98    1.57
  10  -5   1    9.03    1.55
   6 -11  -4    0.57    1.24
   7 -14   6    9.97    1.11
   7 -12  -3    1.35    1.44
   7 -10  -4    3.53    1.34
   8 -13   5   20.59    1.57
   9 -12   0    5.72    1.66
   9 -12   1    2.76    1.77
   9 -10  -2   49.32    2.45
   9  -5  -2    6.42    1.51
   9  -3   1  108.63    2.25
  10  -8   0   13.74    2.15
  10  -8   3    4.07    1.92
  10  -7   0    6.56    1.94
  10  -6   0   49.08    2.10
  10  -6   2    6.91    1.98
   5 -16   3    1.32    0.90
   5 -11  -4   49.40    1.64
   6 -15   1    7.91    1.33
   7 -14   0    3.61    1.37
   7  -9  -4    0.75    1.53
   8 -13   0    3.09    1.50
   9 -12   2   13.87    1.67
   9  -4  -1   45.14    1.65
  10  -8   1    6.39    1.79
  10  -7   1    5.96    1.71
  10  -7   2    8.54    1.77
   6 -14  -1    9.33    1.40
   6 -10  -4  328.40    3.53
   7  -8  -4   45.87    1.65
   7  -6  -4    3.07    0.97
   8 -13   1   38.77    2.06
   8 -11  -2    3.59    1.95
   8 -11   7   29.11    1.83
   9 -11   0    4.28    1.78
   9 -11   4    2.28    1.41
   9 -10  -1   63.54    2.59
   9  -9  -2   42.80    2.14
   9  -8  -2    4.71    1.57
   9  -7  -2    3.87    1.46
   9  -7   6   -0.45    1.27
   9  -6  -2  119.39    2.48
   9  -4   0    1.08    1.34
   5 -12  -3   -0.14    1.40
   6 -15   2    1.64    1.12
   6 -15   5   24.18    1.20
   6  -9  -4   10.81    1.29
   7 -14   1    1.60    1.31
   7 -14   5    3.84    0.96
   7 -14   5    3.34    0.67
   7 -13  -1    7.01    1.50
   7 -12   8    0.92    1.12
   8 -13   2   11.24    1.50
   8 -13   3    8.77    1.38
   8  -9  -3   12.91    1.59
   8  -8  -3   59.47    1.95
   8  -6  -3   46.11    1.64
   8  -4  -2   13.83    1.09
   8  -2   1    5.95    0.85
   9 -11   1   53.68    2.26
   9 -11   3   18.14    1.72
   9  -5  -1   52.96    1.83
   9  -4   1   16.17    1.63
   4 -15   0    4.13    1.31
   5 -13  -2    0.35    1.41
   6 -15   3    2.70    1.08
   6 -15   4    1.42    0.94
   6 -14   0    2.12    1.49
   6  -8  -4   71.82    1.78
   6  -7  -4   21.64    1.20
   7 -14   2    1.61    1.23
   7 -14   3    1.23    1.33
   7 -10  -3    0.99    1.64
   7 -10   9   -0.12    0.99
   8 -10   7   15.81    1.71
   9 -10   0   40.11    2.11
   9 -10   4    2.66    1.53
   9  -9  -1  198.97    3.39
   9  -8  -1   13.55    1.96
   9  -7  -1   29.26    1.98
   9  -5   0    8.85    1.61
   9  -5   4    3.87    1.58
   9  -4   2    2.42    1.23
   4 -16   3    5.50    1.01
   5  -9  -4   -0.11    0.82
   6 -11  -3   91.44    2.15
   7 -13   6   14.90    1.60
   8 -12   1   10.15    1.93
   8  -5  -2    4.30    0.98
   8  -3   0   -0.13    0.97
   9 -10   2   85.36    2.76
   9 -10   3   -1.30    1.62
   9  -9   0   60.44    2.28
   9  -5   1   53.04    2.00
   4 -16   5    0.39    0.80
   4  -9  -4  109.52    1.73
   6 -12  -2    4.71    1.36
   7  -6  -3    8.93    0.96
   8 -12   2   44.55    2.22
   8 -12   3   22.27    1.92
   8  -9   7   30.81    1.98
   8  -8  -2    9.38    1.59
   8  -4  -1   50.26    1.45
   9  -8   0   15.30    1.71
   9  -6   0   25.32    1.59
   4 -15   1   52.77    1.75
   5 -15   2   33.99    1.50
   5 -15   6    7.16    1.04
   5 -14   0   30.45    1.73
   5 -11  -3  170.37    2.56
   6 -14   1   -0.10    1.30
   6 -14   6   22.04    1.48
   6 -12   9   15.32    1.25
   7 -11   8    0.44    1.38
   7  -9   9   22.65    1.42
   7  -8  -3   62.73    1.74
   7  -7  -3    7.27    1.02
   8 -11   0   57.39    2.19
   8 -10  -1   24.20    1.82
   8  -7  -2    2.83    1.21
   8  -7   7   11.53    1.63
   8  -3   1    7.10    0.92
   9  -9   2   25.41    1.97
   9  -8   1   48.86    2.09
   9  -8   2   14.06    2.00
   9  -8   3    1.77    1.48
   9  -7   1  109.91    2.58
   9  -7   2   12.41    1.77
   9  -7   3    4.07    1.83
   9  -6   1   39.87    1.83
   9  -6   2    6.50    1.43
   9  -6   3   72.35    2.14
   3 -16   3    1.14    0.99
   4 -11  -3   11.29    1.04
   5 -15   3    3.31    1.30
   6 -14   2    8.04    1.49
   6 -10  10    4.17    0.97
   7 -13   2   12.46    1.58
   7 -13   3   11.28    1.65
   8  -9  -1   34.38    2.04
   3 -15   1    3.86    1.21
   5 -15   4   15.79    1.27
   5 -14   8    1.71    0.71
   5 -10  -3   31.87    1.46
   6 -14   4   24.85    1.64
   6 -14   5    0.59    1.11
   6 -11  -2   46.40    1.76
   6  -9  -3   52.57    1.59
   7 -11  -1    5.27    1.46
   7 -10   8   30.12    1.93
   8 -11   3   19.84    1.79
   8 -10   0  108.01    2.60
   8  -9   6    5.08    1.73
   8  -8  -1   38.44    1.76
   3 -16   5    0.68    0.85
   5 -14   1    4.04    1.47
   5 -13   9    1.05    1.02
   5 -12  10    2.05    0.89
   6 -12  -1    1.90    1.38
   7  -8  -2    3.23    1.20
   8 -10   1   45.06    2.03
   8  -9   0    2.65    1.47
   8  -5   0    8.39    1.09
   8  -4   1    3.48    0.90
   4 -15   7    3.51    0.86
   4 -10  -3   66.94    1.52
   5 -14   7    8.79    1.25
   5  -9  -3  108.03    1.84
   6 -10  -2  336.01    3.51
   6  -9  10    0.81    1.05
   7 -11   0   59.64    2.09
   7 -10  -1   -0.32    1.31
   7  -9   8   43.60    2.11
   7  -7  -2    1.12    0.94
   8 -10   2   26.53    1.83
   8 -10   4    8.17    1.69
   8  -9   5    6.50    1.56
   8  -8   0   48.74    1.88
   8  -7   0    4.66    1.41
   8  -6   0   20.78    1.31
   8  -4   2   50.02    1.54
   8  -4   3   18.98    1.21
   4 -15   3   12.71    1.16
   4 -15   6    8.49    1.14
   4 -14   9    2.38    0.79
   5 -12  -1   10.69    1.55
   5 -11  -2  177.09    2.55
   5  -8  -3   21.02    0.98
   6 -13   2    6.22    1.71
   6 -13   6    1.10    1.26
   6 -11  -1    3.65    1.44
   7 -12   3   51.12    2.06
   7  -8   8   39.19    1.93
   8  -9   1    9.80    1.57
   8  -9   2   27.84    2.01
   8  -5   1   79.22    1.80
   2 -16   5    8.27    0.98
   2 -16   7    1.71    0.65
   3 -15   2   24.93    1.32
   4 -15   4    6.21    1.12
   4 -15   5   11.19    1.17
   4  -9  -3  198.43    2.16
   5 -14   3   25.25    1.67
   6 -13   3   13.29    1.75
   6 -13   4   50.94    2.07
   6 -13   5   25.59    1.58
   6  -9  -2    0.41    0.99
   7 -11   1    5.62    1.49
   7 -10   0   12.13    1.70
   7 -10   7    4.46    1.64
   8  -8   1    2.08    1.38
   8  -8   2   33.65    2.03
   8  -7   1  205.77    2.87
   8  -6   1    1.24    1.21
   8  -6   2   42.73    1.79
   8  -5   2   53.81    1.65
   8  -5   3   23.40    1.38
   4 -11  -2   21.52    1.18
   5 -14   4   10.11    1.32
   5 -14   5    8.03    1.25
   5 -13   8    0.84    1.23
   5 -10  -2  146.95    2.30
   6 -12   1    2.07    1.59
   6 -10   9    6.39    1.50
   6  -8  -2   15.94    1.07
   7 -11   2   60.47    2.10
   7 -11   4  144.13    2.95
   7  -8  -1    3.13    1.11
   8  -7   2    7.26    1.32
   8  -7   3    4.44    1.45
   8  -7   4   17.40    1.56
   2 -15   2   16.73    1.14
   3 -15   3   17.29    1.24
   4 -14   2   50.95    1.85
   4 -14   8    9.01    1.12
   4 -13   0   14.20    1.25
   4 -12  -1   19.09    1.26
   4 -10  12    0.75    0.65
   5 -13   1    6.81    1.46
   5  -9  11    2.33    0.87
   6 -11   0    2.35    1.49
   6 -10  -1   27.67    1.42
   6  -7  -2   32.19    1.15
   7 -10   1   27.25    1.68
   7  -9   0   13.80    1.39
   7  -3   2   36.62    1.09
   1 -16   5    0.86    0.78
   1 -16   7   -0.11    0.71
   3 -15   7   13.37    1.02
   5 -13   7   14.94    1.69
   5 -12   0   29.41    1.56
   5 -11  -1  141.99    2.31
   6  -9   9   81.81    2.21
   7  -8   0   26.73    1.40
   7  -8   7    0.74    1.42
   7  -5   0   86.98    1.62
   2 -15   3   66.86    1.73
   2 -15   9   21.24    0.95
   3 -15   5   28.83    1.36
   3 -15   6    6.60    1.06
   3 -13   0    4.33    1.23
   4 -14   3    3.04    1.43
   4 -14   7    2.92    1.07
   4 -10  -2   91.41    1.65
   5  -8  -2   61.40    1.39
   6 -12   4    8.58    1.53
   6 -11   1    5.08    1.62
   6 -11   7    4.30    1.57
   7 -10   3  162.67    2.82
   7 -10   4   26.51    1.78
   7  -9   1   96.90    2.19
   7  -7   0   -0.52    0.93
   7  -5   6   38.46    1.65
   3 -14   9    1.10    0.90
   4 -14   4   23.31    1.59
   4 -14   5   10.48    1.51
   4 -14   6    7.35    1.25
   4 -13   1  174.55    2.56
   5 -13   3    2.81    1.43
   5 -13   4    8.39    1.62
   5 -13   5    2.26    1.51
   5 -13   6   11.47    1.43
   5 -12   1    0.62    1.46
   5 -10  -1   12.04    1.25
   6  -8  -1    0.95    0.85
   6  -7  -1   47.05    1.34
   6  -7   9    4.17    1.41
   7  -9   5    6.29    1.45
   7  -8   1    6.00    1.17
   7  -6   1    1.79    0.99
   7  -5   1   11.51    0.92
   7  -4   2   34.49    1.13
   7  -4   3   96.85    1.76
   7  -4   4  178.93    2.29
   0 -16   6   41.97    1.17
   1 -15   3    6.89    1.17
   1 -15  10    8.63    0.64
   1 -15  10    2.41    0.36
   2 -15   4    4.46    1.22
   4  -9  -2   36.16    1.07
   6 -11   2    0.18    1.33
   6  -9   0    9.75    1.25
   7  -9   3   77.90    2.12
   7  -9   4   11.93    1.54
   7  -8   2   71.21    1.87
   7  -8   5    6.51    1.34
   7  -7   1   17.77    1.17
   7  -5   2   23.41    1.08
   2 -15   5   51.86    1.60
   5 -12   2   13.96    1.67
   5  -9  -1   42.01    1.41
   6 -11   3    2.69    1.41
   6 -11   4    3.48    1.46
   6 -10   1   23.27    1.47
   6 -10   7    5.69    1.58
   7  -8   3   54.91    1.80
   7  -7   2   11.60    1.15
   7  -7   4   11.79    1.52
   7  -7   5   12.82    1.36
   7  -6   2  185.66    2.34
   7  -5   3   63.84    1.49
   7  -5   4   -1.07    0.94
  -1 -16   7   -0.34    0.65
  -1 -16   8    3.20    0.62
   1 -15   9    5.27    0.86
   2 -15   6    1.58    0.96
   2 -14  10    2.02    0.79
   3 -14   3    0.99    1.13
   3 -13   1  142.71    2.22
   4 -10  11    7.51    1.22
   5 -12   3    3.46    1.54
   5 -12   6   50.10    2.06
   5 -11   8    6.36    1.85
   6 -10   2   89.32    2.21
   6  -8   0   82.64    1.65
   1 -15   4    2.60    0.92
   2 -11  13    4.04    0.66
   3 -14   4   57.52    1.71
   4 -12   1    4.48    1.13
   5 -11   1    9.82    1.23
   5  -8  -1   66.30    1.34
   5  -8  10   37.50    1.68
   5  -7  10   24.99    1.56
   6 -10   5  219.80    3.22
   6  -9   1   26.80    1.34
   6  -6   0    6.08    0.73
   0 -15   4   -0.78    0.97
   0 -15  10    0.55    0.70
   1 -15   5    2.79    1.14
   2 -13   1    4.71    1.11
   2 -13  11    0.98    0.67
   2 -12  12    8.42    0.89
   3 -14   5   16.26    1.33
   3 -14   6  101.33    2.08
   4 -13   5   86.08    2.07
   4  -9  11   17.49    1.47
   5 -11   2   13.71    1.49
   6 -10   4  121.84    2.40
   6  -9   2   11.13    1.38
   6  -9   6    1.77    1.55
   6  -8   1    5.69    1.00
   1 -15   7    8.54    1.00
   1 -13  12    1.14    0.67
   1 -12  13    0.99    0.60
   3 -10  12   10.05    0.93
   5  -9   0   -0.98    0.77
   6  -7   1    5.13    0.84
   6  -6   1    9.76    0.80
   6  -3   4    6.15    0.64
   0 -15   9    3.56    0.86
   2 -14   4   22.76    1.45
   3 -13   8    4.27    1.41
   3 -12   1   56.57    1.51
   3 -11   0   11.67    1.12
   4 -11   1    8.35    1.29
   4 -11   9    1.80    1.88
   5 -11   3   11.78    1.36
   5 -11   4    9.86    1.56
   5 -11   5    4.86    1.56
   6  -9   4   51.07    1.76
   6  -8   2   71.59    1.64
   2 -14   5   11.33    1.36
   2 -10  -1    7.09    0.72
   2 -10  13    1.75    0.75
   4 -12   7   12.21    1.52
   5 -10   2   63.33    1.66
   6  -8   3    3.52    1.03
   6  -8   4   49.33    1.59
   6  -8   5   25.22    1.44
   6  -7   6    7.02    1.21
   6  -6   2  146.59    1.86
   6  -5   2   33.77    1.01
   6  -5   6    1.68    0.99
   6  -4   3   94.81    1.41
   6  -4   4  128.57    1.66
  -1 -15   5   39.33    1.27
  -1 -15  10    5.06    0.66
   0 -15   6    3.13    0.89
   0 -15   7   51.34    1.39
   0 -15   8    4.37    0.87
   2 -14   6   32.06    1.43
   3 -13   6    0.42    1.44
   3 -13   7   44.08    1.71
   3  -9  12   24.93    1.19
   4 -12   4  121.04    2.25
   4  -7  11   48.15    1.55
   5 -10   3   81.94    2.04
   5 -10   6    8.72    1.69
   5  -7   0    7.40    0.68
   6  -7   3   56.89    1.46
   6  -7   4   21.14    1.16
   6  -6   3   26.44    1.08
   6  -6   4   12.87    1.13
   6  -5   3    9.14    0.76
   6  -5   4   96.05    1.62
   6  -5   5   40.32    1.24
   2 -12   1  117.33    1.79
   2 -11   0    1.44    0.66
   3 -12   2    5.04    1.06
   3 -12   9   -0.25    1.36
   4 -11   2   49.72    1.51
   4 -10   1    4.04    1.02
   4  -9   0   50.75    1.18
   5 -10   4    4.52    1.20
   5 -10   5   16.93    1.41
   5  -9   2    7.75    1.12
   5  -9   7    3.02    1.59
   5  -8   1   36.53    1.11
  -1 -15   7   17.67    1.08
   1 -14   5    4.92    1.20
   1 -14   8   21.46    1.33
   1 -13   2   67.46    1.49
   1 -11  13   14.22    0.89
   2 -13   3   10.89    1.18
   3 -10   0  250.15    2.26
   3  -8  12   29.01    1.24
   4 -11   3    6.76    1.29
   5  -7   1   22.26    0.96
  -3 -15  11    0.60    0.51
  -1 -13  13    6.03    0.66
   0 -13  12    4.05    0.72
   1 -14   6   47.45    1.61
   1 -14   7    1.13    1.00
   2 -13   4    5.56    1.34
   3  -7  12   15.27    1.19
   4 -11   4   14.79    1.29
   4 -11   6   13.40    1.38
   4  -8  10    6.01    1.40
   5  -9   3   12.67    1.13
   5  -9   4   -0.14    1.23
   5  -9   5   84.97    2.01
   5  -9   6   92.47    2.06
   5  -8   7  116.34    2.20
   5  -5   8    8.80    0.96
  -2 -15   9    5.18    0.75
   1  -9  14   -0.01    0.56
   2 -13   7   17.12    1.55
   2 -10  12   39.65    1.53
   3 -12   7    2.37    1.29
   4 -10   2   66.71    1.50
   5  -8   6    7.80    1.32
   5  -7   7   87.36    1.97
   5  -4   7  102.90    1.67
  -3 -15  10    0.36    0.60
  -2 -15   8   28.20    1.00
  -2 -14  12    1.19    0.63
   0 -14   9   15.30    1.09
   2 -11   1    2.64    0.89
   3 -12   5   38.11    1.54
   3 -11   2   11.40    1.02
   3 -10   1   39.81    1.21
   3  -9   0    8.51    0.64
   4 -10   3   23.42    1.30
   5  -8   3   10.06    0.95
   5  -8   4    5.32    0.94
   5  -8   5   43.21    1.42
   5  -7   2   21.62    0.90
  -3 -15   8    1.12    0.71
   0 -14   6    2.63    1.11
   0 -14   7   10.29    1.20
   0 -14   8   10.85    1.03
   2 -12   9    8.27    1.41
   2  -7  13   24.22    1.12
   3  -8  11   55.29    2.01
   4 -10   4   37.61    1.40
   4 -10   5   24.42    1.48
   4  -8   9    9.59    1.37
   5  -7   3   72.89    1.37
   5  -7   5   26.12    1.27
   5  -4   6  412.25    2.76
  -3 -13  14    1.69    0.47
  -1 -14  10    7.00    0.83
   0 -10  14    7.02    0.77
   0  -8  15    0.25    0.53
   1 -13   4   21.94    1.17
   1 -12   2   79.51    1.45
   1 -11  12    7.46    1.06
   2  -9  12   25.90    1.46
   5  -7   4    4.82    0.81
   5  -6   3   16.53    0.82
   5  -6   4  150.51    1.84
   5  -6   5   45.20    1.31
   5  -6   6    7.20    0.93
   5  -4   5    1.47    0.54
  -4 -14  13    0.77    0.36
  -3 -14  12   16.16    0.78
  -2 -13  13    5.41    0.69
  -1 -14   9    2.33    1.00
  -1 -13  12   -0.14    0.73
  -1 -10  15    7.85    0.57
   0 -12  12   27.15    1.13
   0 -11  13   24.11    1.09
   1 -13   5    7.47    1.08
   1 -13   7   46.37    1.70
   1 -13   8    2.49    1.16
   2 -12   4   19.19    1.13
   2 -12   8   76.65    2.00
   2 -11   2    6.23    0.96
   3 -11   4   11.71    1.11
   3 -11   5  109.68    2.08
   3 -11   7  238.09    2.91
   3 -10   2    5.98    0.81
   3  -9   1   36.71    1.03
   4  -9   7   84.00    1.95
   4  -6   9   10.70    1.30
   4  -5   9   28.14    1.28
   5  -5   4   12.95    0.71
  -3 -12  15   -0.13    0.28
  -3 -12  15    0.11    0.19
  -2 -12  14   16.31    0.75
  -2 -11  15    4.36    0.55
  -1 -14   6    5.74    0.93
  -1 -14   8   64.87    1.56
  -1 -12  13   28.89    1.03
  -1 -11  14    0.63    0.67
   0 -12   2   10.18    0.91
   1  -9  13   43.11    1.35
   2 -12   5   15.06    1.19
   2 -12   6   70.60    1.72
   2 -10   1    6.19    0.65
   2  -8  12   37.14    1.53
   4  -9   4   42.40    1.29
   4  -9   5    5.97    1.01
   4  -9   6   90.93    1.86
  -2 -14  10    1.40    0.87
   0 -13   9    6.92    1.27
   3 -10   8   44.35    1.73
   3  -9   9  103.01    2.42
   3  -8  10    2.09    1.41
   4  -8   3    2.81    0.70
  -4 -14  12    6.31    0.65
  -4 -13  14   -0.15    0.44
  -2 -14   6   18.45    0.98
  -2 -14   9    6.35    1.01
  -1 -13  11    4.34    0.94
   0 -13   5    3.51    0.93
   0 -12  11    6.54    1.22
   0  -9  14   57.87    1.25
   1 -12   9    4.42    1.29
   2 -11   3   16.73    0.99
   3 -10   7   23.65    1.38
   4  -8   4   81.26    1.44
   4  -8   5   40.40    1.30
   4  -8   6   19.93    1.13
  -3 -14   6   96.07    1.52
  -3 -13  13    6.69    0.63
  -2 -14   7    1.64    0.81
  -2 -14   8   25.21    1.05
  -2 -13  12    0.98    0.72
  -1 -13   4    4.68    0.82
   0 -13   6   23.45    1.20
   0 -12   3    1.32    0.85
   1 -12   4    4.82    0.91
   1 -11   2    8.94    0.79
   1 -10   1    9.80    0.68
   1  -8  13   42.94    1.35
   2 -11   4   18.14    1.04
   2 -11   8   36.77    1.60
   3 -10   5    1.23    0.94
   3 -10   6   19.28    1.23
  -5 -14  12    3.74    0.51
  -4 -14  11   12.95    0.81
  -3 -14   7    6.16    0.91
  -3 -14  10   42.21    1.13
  -3  -8  17    1.26    0.38
  -1 -12  12    9.83    0.96
   1 -12   6   12.78    1.12
   1 -12   7   11.26    1.18
   1 -11  10   -0.37    1.32
   2 -11   5    6.72    0.98
   2 -11   6    1.78    1.03
   2 -11   7   84.18    1.85
   4  -7   4   11.49    0.75
   4  -7   5   83.41    1.40
   4  -7   6   50.64    1.30
   4  -6   7   75.87    1.48
   4  -5   7   91.40    1.54
   4  -4   7   19.05    0.89
  -6 -14  12   30.88    0.71
  -5 -13  14    0.04    0.38
  -3 -14   8   10.56    0.85
  -3 -14   9    0.52    0.73
  -3 -11  15    6.08    0.60
  -2 -13  11    3.66    0.93
  -2 -10  15    5.98    0.61
  -1 -13   9   18.70    1.30
  -1 -11  13   35.17    1.13
  -1 -10  14    6.84    0.75
   0 -11   2    0.53    0.62
   1 -11   3    3.31    0.87
   1  -9  12    1.78    1.08
   1  -7  13   41.33    1.35
   2 -10   3   -0.48    0.76
   3  -9   4   20.53    0.94
   3  -9   7    4.58    1.07
   3  -8   2   10.02    0.62
   3  -5  10   87.79    1.63
   4  -6   5   30.39    0.98
   4  -6   6   45.94    1.13
  -6 -14  11   21.14    0.71
  -5 -14  11    9.49    0.63
  -4 -14   8    3.29    0.79
  -4 -14   9   -0.32    0.78
  -4 -14  10   33.63    0.96
  -4 -13  13    8.00    0.71
  -3 -13  12    2.42    0.79
  -2 -11  14   11.92    0.75
  -1 -13   6    0.66    0.85
  -1 -13   8    0.78    0.96
  -1 -12   3    1.35    0.61
  -1  -8  15    4.92    0.63
   0 -12   4   35.59    1.12
   0 -10   1   23.82    0.72
   2 -10   8  191.12    2.54
   3  -9   5    5.87    0.87
   3  -9   6   33.58    1.25
   4  -5   5  232.36    1.90
   4  -5   6    4.12    0.64
   4  -4   6   49.27    0.96
  -6 -14  10    1.95    0.55
  -6 -13  14    4.76    0.47
  -5 -14  10    2.32    0.67
  -5 -12  15    0.19    0.43
  -4  -9  17    4.27    0.39
  -2 -13   5  104.28    1.53
  -2 -13  10    5.62    1.07
   0 -12   5    6.57    1.03
   0 -11  11    8.89    1.25
   0  -7  14   -0.02    0.83
   1 -11   4   45.53    1.19
   1 -10   2   57.75    1.04
   1  -6  13   12.97    0.89
   2 -10   7    1.46    1.01
   2  -9   2   42.65    0.92
   2  -7  11    8.74    1.30
   3  -8   3   11.91    0.68
   3  -8   7   38.68    1.40
   3  -6   9    2.69    0.90
  -3  -9  16    6.66    0.59
  -2 -13   6    0.80    0.94
  -2 -13   9   74.83    1.62
  -2 -12  12    5.62    1.01
   0 -12   6    9.22    1.01
   0 -12   7    4.63    1.01
   1 -11   7   21.24    1.37
   1  -8  12   12.71    1.27
   2 -10   5   -0.68    0.78
   2 -10   6  130.56    1.92
   3  -8   5    0.50    0.81
   3  -7   8    4.18    0.97
   3  -5   9    5.39    0.83
   3  -4   9   74.90    1.38
  -5 -13  13    9.81    0.61
  -4 -12  14    9.56    0.66
  -4 -10  16    3.05    0.51
  -3 -13  11   18.44    0.98
  -3 -12  13    1.67    0.70
  -2  -9  15    4.57    0.66
  -2  -7  16    1.33    0.49
  -1 -12  10   15.80    1.22
   0 -11   3    2.48    0.64
   2  -9   8   47.06    1.64
   3  -6   8   49.75    1.33
  -6 -13  13    3.93    0.57
  -6 -12  15    3.91    0.46
  -4 -11  15    7.09    0.60
  -3 -13   6    4.22    0.90
  -3 -11  14    0.96    0.74
  -3 -10  15    9.75    0.74
  -2 -11  13    6.96    0.88
  -2 -10  14    6.45    0.79
  -1  -6  15    2.77    0.63
   0  -8  13    0.74    0.89
   1 -10   3   53.75    1.05
   1 -10   9    5.72    1.29
   2  -9   4    2.36    0.71
   3  -7   6   77.21    1.39
   3  -5   8  114.40    1.61
  -8 -13  13    6.46    0.44
  -7 -13  13   14.34    0.60
  -6 -10  17    1.41    0.34
  -5 -13  12   24.51    0.93
  -4  -8  17    0.65    0.43
  -3 -13   9   68.48    1.54
  -2 -12  11   -0.21    0.95
  -1 -12   6    6.33    1.01
  -1 -12   8    9.42    1.25
   0 -11   4    8.53    0.75
   0  -9  12    7.74    1.24
   1 -10   4   20.53    0.93
   1 -10   8   31.40    1.53
   1  -9  10    1.43    1.41
   2  -9   6    2.19    0.80
   2  -9   7  122.84    1.86
   3  -7   5  393.76    2.51
   3  -6   7   72.93    1.29
  -7 -12  15    7.17    0.43
  -5 -12  14    7.95    0.60
  -3 -12  12   11.84    0.94
  -1 -12   7    8.03    1.00
  -1  -8  14   11.40    0.86
   0 -11   5   29.44    1.03
   0 -11   8   16.15    1.17
   1 -10   5    4.82    0.88
   1 -10   7   12.13    1.17
   1  -6  12   85.86    1.73
   2  -8   3   45.26    0.92
   2  -8   8    4.96    0.98
   3  -6   6   35.20    0.98
   3  -5   7   94.42    1.38
  -6 -13  12    0.14    0.63
  -5 -13  11   39.94    1.11
  -4 -13   9    5.11    0.92
  -4 -13  10    2.95    0.80
  -2 -12   5    5.76    0.83
  -2 -12  10  115.56    1.89
  -2 -11  12    1.76    0.96
  -1  -9  13    7.27    0.95
   0 -11   6   15.29    0.96
   0 -11   7    7.49    0.97
   1 -10   6   33.82    1.12
   1  -5  12    7.13    1.04
   2  -8   7   11.96    0.99
   2  -7   9    7.59    1.07
   3  -6   5   14.31    0.65
   3  -4   7    0.71    0.45
  -8 -13  12    0.58    0.41
  -7 -11  16    2.14    0.36
  -7 -10  17    0.37    0.32
  -6 -12  14   13.78    0.67
  -5 -10  16    5.24    0.51
  -4 -11  14    4.97    0.79
  -4  -9  16    1.89    0.52
  -3 -11  13   15.88    0.94
  -3  -9  15    2.63    0.72
  -2 -10  13    9.69    1.12
  -2  -9  14    3.99    0.77
  -1 -11   4    9.71    0.79
  -1  -7  14    9.50    0.95
   0  -9  11   13.06    1.40
   1  -9   3  111.77    1.27
   2  -4  10   74.80    1.33
   3  -5   6   41.26    0.86
  -6 -13  11    3.37    0.65
  -5 -13   8   12.46    0.85
  -5 -13   9    5.71    0.81
  -5 -13  10    1.74    0.74
  -5 -12  13    1.15    0.74
  -4 -12  12   46.35    1.26
  -4 -10  15    0.82    0.56
  -3  -7  16    9.03    0.67
  -2 -12   7    9.38    0.91
  -2 -12   8   10.11    0.95
  -1 -11   9   89.09    1.75
   1  -9   4   19.59    0.80
   1  -9   8    0.91    0.94
   2  -7   8    4.73    0.81
  -8 -11  16    0.32    0.24
  -8 -11  16    0.09    0.16
  -7 -13  10    2.56    0.60
  -7 -12  14   34.49    0.77
  -6 -11  15   23.53    0.77
  -5  -8  17    0.72    0.47
  -3 -12  10   60.35    1.43
  -2 -11  11   50.23    1.51
  -1 -11   5   29.30    0.96
  -1 -11   8    2.25    1.08
  -1  -8  13    2.31    0.93
   0 -10   4    4.67    0.60
   0 -10   8    4.37    1.14
   1  -9   7   16.09    0.97
   1  -6  11    8.82    1.08
   2  -7   7   17.53    0.83
  -9 -12  14    0.52    0.33
  -7  -8  18    0.46    0.33
  -6 -12  13   21.65    0.85
  -6 -10  16    7.03    0.58
  -4 -12  11    3.69    0.96
  -3 -12   6   17.06    0.87
  -3 -11  12    3.96    0.95
  -2 -10  12   13.34    1.30
  -2  -8  14    2.68    0.87
  -1 -11   6   16.10    0.91
  -1 -11   7   18.04    1.01
  -1 -10   3   18.35    0.68
   0 -10   5    1.55    0.65
   0  -8  11    4.05    1.51
   0  -7  12    6.85    1.10
   1  -9   6    1.30    0.69
   1  -5  11   28.13    1.33
   2  -7   4   34.97    0.76
   2  -7   5   99.84    1.23
   2  -7   6    0.44    0.56
   2  -6   8   15.95    0.86
   2  -4   9  112.79    1.47
  -5 -11  14    0.11    0.62
  -5  -9  16    4.85    0.60
  -4 -11  13   26.12    1.02
  -4  -8  16    2.37    0.58
  -3 -12   7    1.51    0.76
  -2 -11  10    2.51    1.03
  -2  -9  13   18.50    1.12
  -2  -6  15    0.33    0.59
   1  -8   8  116.97    1.80
   1  -4  11    7.04    0.91
   2  -6   7   24.52    0.90
  -7 -12  13    4.98    0.67
  -7 -11  15   15.79    0.61
  -5 -10  15    0.31    0.59
  -4 -12   6   54.74    1.09
  -4 -12  10   95.47    1.56
  -4  -9  15    5.15    0.79
  -3 -11   4   21.20    0.79
  -3 -10  13    5.00    0.92
  -3  -9  14    4.09    0.82
  -2 -11   5   12.58    0.73
  -2 -11   9    7.37    1.00
   0  -6  12  230.91    2.48
   1  -8   7   20.68    0.99
   2  -6   6  297.49    2.04
  -9 -12  13    0.29    0.41
  -8 -12  13    1.67    0.51
  -8 -11  15   11.33    0.56
  -7 -10  16    2.38    0.46
  -7  -9  17    0.64    0.32
  -6 -12  12   17.39    0.85
  -6 -11  14    7.50    0.73
  -5  -7  17    7.44    0.52
  -4 -12   7   32.76    0.99
  -2 -11   8    1.74    0.85
  -2 -10   3   24.07    0.70
  -2 -10  11    3.88    1.07
  -1 -10   4    3.09    0.50
  -1 -10   9    0.12    0.98
  -1  -8  12  134.97    2.14
   0  -9   8    2.70    0.99
   1  -8   5   59.21    1.00
   1  -8   6  275.84    2.10
   2  -5   7   98.03    1.26
   2  -4   8  116.30    1.33
 -10 -11  15    1.67    0.27
  -9 -11  15   14.88    0.55
  -8  -8  18    2.86    0.34
  -7 -12  12   14.05    0.85
  -6  -6  18   11.65    0.44
  -5 -12   7   93.97    1.40
  -5 -12  10    5.74    0.96
  -5 -11  13   46.38    1.15
  -4 -11  12   27.06    1.13
  -4  -7  16    2.44    0.67
  -3 -11  10   25.96    1.29
  -3  -7  15    3.94    0.82
  -2  -7  14    3.02    0.80
  -1 -10   5   42.52    0.95
   0  -5  12  122.66    1.84
   1  -5  10    6.72    0.85
  -8 -12  12    7.88    0.68
  -8 -10  16   10.39    0.51
  -8  -9  17    2.81    0.42
  -7 -11  14   21.44    0.84
  -7  -7  18    2.43    0.37
  -6 -10  15   -0.20    0.55
  -6  -9  16    0.99    0.51
  -5 -12   8   16.25    0.93
  -5  -8  16   46.50    1.01
  -3 -11   5   33.12    0.87
  -2 -10  10   26.82    1.41
  -2  -9  12   53.73    1.52
  -1  -9  10   21.21    1.29
  -1  -6  13    3.88    0.81
   0  -4  12    5.11    0.94
   1  -6   9   13.13    0.91
   1  -4  10   24.37    0.98
  -9 -12  11    8.06    0.55
  -9 -10  16    5.27    0.46
  -8 -12  11   21.81    0.83
  -7 -12  11    5.92    0.71
  -6  -5  18    0.40    0.38
  -5 -10  14   91.81    1.40
  -5  -9  15   27.53    0.97
  -5  -6  17    0.49    0.51
  -4 -10  13    9.14    0.95
  -4  -9  14    1.87    0.91
  -3 -11   8    4.89    0.92
  -3 -11   9   28.54    1.18
  -3  -8  14    2.77    0.81
  -1  -7  12   23.60    1.28
   1  -7   7   56.45    1.08
 -10 -11  14   -0.06    0.38
 -10 -10  16    1.55    0.34
  -9  -9  17    8.12    0.46
  -8 -12  10   12.43    0.73
  -8 -11  14    0.24    0.50
  -7 -12   9    8.06    0.78
  -7 -12  10   16.74    0.79
  -7 -10  15   11.62    0.73
  -7  -8  17    3.18    0.50
  -5 -11  12    0.82    0.83
  -4 -11   5    6.71    0.57
  -3 -11   7   41.88    1.09
  -3  -6  15    1.41    0.74
  -2 -10   9    7.49    0.98
  -1  -9   9    5.32    1.00
   0  -8   8    4.36    0.77
   1  -7   5   17.79    0.60
   1  -6   8   74.39    1.25
   1  -5   9   35.77    0.98
 -10  -9  17    3.26    0.36
  -9 -11  14    0.63    0.39
  -8  -7  18   -0.04    0.38
  -7 -11  13    9.01    0.81
  -6  -7  17    5.51    0.55
  -4 -11   6   21.46    0.88
  -4 -11  10    6.90    0.92
  -2 -10   5   24.66    0.78
  -2 -10   8   19.62    0.99
  -2  -8  12   23.84    1.45
  -2  -7  13   44.24    1.29
  -1  -9   4   17.15    0.58
  -1  -9   8   85.34    1.56
   0  -8   7    5.75    0.68
  -6 -11  12   41.71    1.13
  -6 -10  14   33.87    0.99
  -6  -8  16   26.95    0.89
  -5 -10  13    7.23    0.89
  -5  -7  16   -0.30    0.67
  -4 -11   7    3.92    0.83
  -4 -11   8   38.77    1.20
  -4 -11   9   32.42    1.09
  -3 -10   4   18.01    0.67
  -3 -10  10    3.42    1.17
  -2 -10   6   18.11    0.79
  -2 -10   7    5.82    0.73
  -1  -9   6    1.66    0.63
  -1  -8  10    2.77    1.07
  -1  -6  12   50.66    1.40
   0  -8   5   10.45    0.55
   0  -8   6   12.24    0.65
   0  -7   9    1.67    0.84
   1  -6   7   22.07    0.75
   1  -5   8  106.48    1.36
   1  -4   9   41.64    0.94
 -11 -10  15    1.96    0.37
 -10 -11  13    8.24    0.50
  -8 -11  13    7.84    0.66
  -8  -8  17    7.17    0.54
  -6  -9  15   17.08    0.81
  -5 -11   6    5.66    0.71
  -5 -11  10    4.13    0.93
  -5  -9  14   16.15    0.98
  -4  -8  14   79.36    1.51
  -4  -7  15   38.83    1.02
  -3  -8  13   22.92    1.12
   0  -4  11    0.69    0.72
   1  -6   6   30.79    0.73
   1  -3   9    7.12    0.53
  -9  -7  18   -0.10    0.32
  -8  -9  16   13.63    0.63
  -7 -11  12    5.40    0.74
  -6 -11  11    4.72    0.83
  -6  -6  17    1.82    0.49
  -5 -11   7    9.50    0.85
  -5 -11   9   50.17    1.27
  -4 -10  11   17.08    1.06
  -3 -10   5    2.77    0.51
  -3 -10   9    6.04    0.90
  -2  -6  13   11.39    0.96
  -1  -5  12   18.73    1.11
   0  -7   8   29.00    0.94
   0  -3  11    5.50    0.80
   1  -5   7   85.98    1.14
   1  -4   8  251.72    1.85
  -9  -8  17    8.59    0.55
  -5  -6  16   17.86    0.84
  -3 -10   7    6.89    0.88
  -2  -7  12    1.93    0.97
   0  -7   7  190.10    1.70
 -11  -9  16    0.08    0.38
 -11  -7  18    1.81    0.31
 -10 -11  11   10.96    0.59
 -10  -9  16    0.70    0.46
 -10  -7  18    2.29    0.29
  -8 -10  14    4.19    0.65
  -7 -11  11   52.61    1.19
  -7  -8  16    9.02    0.65
  -6 -11   7   12.10    0.68
  -6 -11   8    7.49    0.87
  -6 -11   9    3.55    0.87
  -4  -9  12   37.09    1.37
  -4  -6  15   -0.01    0.67
  -3  -7  13   55.82    1.47
  -2  -9   8    9.10    0.82
  -1  -8   8  168.31    1.85
  -1  -4  12   12.70    1.00
 -12 -10  13   14.78    0.51
 -11 -10  14   24.55    0.62
 -11  -8  17    1.27    0.35
 -10  -8  17    0.34    0.38
  -9 -11  10    2.37    0.66
  -9 -11  11   12.73    0.70
  -8 -11  10    6.00    0.78
  -8 -11  11   42.01    1.03
  -7 -11   8    2.97    0.75
  -7 -10  13   29.69    1.10
  -6  -9  14   16.78    0.91
  -6  -5  17   26.95    0.75
  -5 -10  11    3.15    0.89
  -5  -7  15   40.90    1.14
  -4 -10   5    0.65    0.48
  -4 -10   9    1.82    0.92
  -4  -8  13   -0.59    0.99
  -3  -9  10   22.61    1.15
  -2  -9   6   13.29    0.68
  -2  -9   7  311.86    2.26
  -2  -8  10    4.24    0.98
  -2  -5  13    3.80    0.75
  -1  -8   5   10.03    0.52
  -1  -8   6  276.95    1.93
  -1  -8   7   13.16    0.71
   0  -6   8   42.97    1.01
  -8  -9  15    3.06    0.63
  -8  -8  16    2.83    0.65
  -8  -7  17   21.60    0.69
  -8  -5  18    0.73    0.46
  -7  -6  17    6.39    0.64
  -5  -5  16    2.06    0.71
  -4 -10   6   19.42    0.75
  -2  -7  11    1.61    1.00
  -1  -7   9    6.87    0.88
  -1  -5  11    6.25    1.07
  -1  -3  12   34.00    0.97
 -13  -9  14    2.23    0.32
 -11 -10  13   14.73    0.65
 -10  -4  19    1.01    0.32
  -9  -9  15   13.03    0.74
  -8 -10  13    4.98    0.73
  -7  -9  14   17.20    0.98
  -6  -4  17    0.09    0.55
  -5 -10  10   81.73    1.47
  -3  -9   4    7.31    0.44
  -2  -8   9    0.23    0.81
  -2  -4  13    5.67    0.70
   0  -6   7   14.87    0.62
 -11  -9  15    2.33    0.51
 -10 -10  13    8.92    0.70
 -10  -9  15    2.21    0.56
 -10  -6  18    1.79    0.42
  -9 -10  13    1.14    0.63
  -9  -8  16    0.52    0.59
  -9  -7  17    2.56    0.48
  -7  -8  15    0.25    0.78
  -7  -7  16   18.27    0.78
  -6 -10  11   18.32    0.99
  -6  -6  16   29.28    0.87
  -5 -10   6   40.38    0.97
  -5 -10   9   20.56    1.02
  -5  -9  12   13.46    1.01
  -3  -9   8   14.27    0.83
  -3  -7  12   25.94    1.19
  -3  -6  13   13.61    0.91
   0  -5   8  166.33    1.61
 -13  -9  13    1.93    0.37
 -12  -6  18    3.36    0.34
 -11 -10  12   52.58    0.95
 -11  -6  18    3.65    0.39
  -9  -5  18    1.50    0.49
  -8 -10  12   51.93    1.25
  -6 -10  10   99.93    1.60
  -6  -7  15   18.65    1.00
  -5 -10   7    1.88    0.60
  -5 -10   8   16.61    0.84
  -5  -8  13   25.36    1.20
  -4  -9  10    0.45    0.87
  -4  -7  13    1.49    0.97
  -4  -4  15    4.33    0.72
  -3  -9   6   13.10    0.64
  -3  -9   7   33.10    0.92
  -2  -8   8   29.27    0.96
  -2  -7  10    5.94    0.95
  -2  -5  12   43.53    1.22
  -1  -7   7   47.62    0.94
 -12  -8  16   19.31    0.54
 -12  -7  17    4.75    0.42
 -11 -10  11   27.41    0.79
 -11  -8  16   13.11    0.58
 -10 -10  12   12.76    0.79
 -10  -8  16    6.42    0.55
 -10  -7  17   10.45    0.54
  -9 -10  12   12.16    0.88
  -6 -10   6   71.72    1.11
  -5  -9  11   50.49    1.43
  -4  -9   4  117.83    1.12
  -2  -8   5   33.16    0.70
  -2  -8   6   13.11    0.61
  -2  -8   7   15.97    0.71
  -2  -6  11    1.76    0.90
  -1  -7   6    5.62    0.47
   0  -3   9  135.68    1.43
 -11  -9  14    1.24    0.60
  -8  -8  15   35.32    0.98
  -8  -3  18    1.90    0.48
  -7 -10  10   33.06    1.18
  -6 -10   8   25.92    0.97
  -6 -10   9   26.67    0.97
  -6  -9  12    0.78    0.84
  -6  -5  16    4.49    0.67
  -5  -3  16    2.00    0.54
  -4  -9   5  241.21    1.70
  -4  -9   9  138.46    1.75
  -3  -7  11   24.07    1.26
  -3  -5  13   14.91    0.89
  -1  -3  11   74.66    1.31
 -11  -3  19    3.04    0.33
 -10 -10  10   39.55    1.00
 -10  -9  14    2.51    0.58
 -10  -2  19    0.20    0.30
  -9 -10  11    7.28    0.71
  -9  -6  17    5.99    0.66
  -7 -10   8    3.31    0.78
  -7 -10   9    5.01    0.86
  -7  -8  14    9.12    0.99
  -7  -6  16   37.50    0.98
  -7  -4  17    0.11    0.61
  -5  -9  10    5.23    1.03
  -4  -9   6   88.05    1.22
  -4  -9   7   41.81    1.03
  -4  -9   8    9.61    0.75
  -4  -5  14    4.60    0.75
  -3  -8   9    2.18    0.77
  -3  -6  12    1.62    0.87
  -2  -4  12    4.81    0.75
 -12  -9  13    6.75    0.54
 -11  -5  18    7.33    0.49
  -9  -8  15    0.23    0.64
  -9  -7  16   13.11    0.73
  -8 -10   8   40.92    1.04
  -8 -10   9   -0.28    0.74
  -8  -5  17    9.16    0.62
  -7  -7  15    9.95    0.83
  -5  -6  14    4.42    0.95
  -4  -7  12   22.02    1.11
  -4  -6  13   84.23    1.49
  -1  -6   7   84.66    1.15
 -12  -8  15   19.11    0.63
 -12  -5  18    0.11    0.31
 -10  -8  15   -0.01    0.57
  -9  -9  13   20.32    0.91
  -6  -4  16    1.31    0.63
  -5  -9   9   45.35    1.14
  -3  -7  10    0.39    0.83
  -3  -4  13    5.24    0.72
  -2  -3  12    3.67    0.65
  -3 -17   3    2.16    1.00
  -3 -17   4    2.41    0.87
  -3 -17   5   26.17    1.22
  -3 -16   0    6.39    0.97
  -3 -15  10    0.63    0.76
  -3 -14  11    1.36    0.73
  -2 -16   7    3.06    1.04
  -2 -14  10    1.31    0.86
  -1 -16   5    0.58    1.39
   0 -14  -2   10.20    1.22
   1 -14   5    5.91    1.80
   2 -13  -1   32.93    1.88
   3 -12   1   58.67    2.06
   3 -10   5   -0.83    1.68
   3  -9  -3  115.15    1.81
   4  -8   1  140.49    2.11
  -5 -17   2    0.51    0.65
  -4 -17   2    0.67    0.77
  -2 -16   0    6.25    1.09
  -2 -15   9    6.67    1.00
  -1 -16   1    0.05    1.11
  -1 -14   9    1.32    1.07
  -1 -13  10    7.40    1.18
   0 -15   6    2.73    1.50
   3 -12   0    7.39    1.44
   3 -12   3   59.44    2.29
   3 -11  -2    8.64    1.16
   4  -9   0   48.56    1.51
   4  -9   1    9.24    1.10
   4  -9   2   65.99    1.82
   4  -8  -1   48.07    1.33
   4  -8   2   67.88    1.63
  -3 -17   2    4.79    0.92
  -2 -17   3    4.24    1.11
  -2 -17   4    7.64    1.11
  -2 -15  -2   15.74    1.15
  -1 -16   0    7.65    1.34
  -1 -15   8    0.47    1.18
   0 -16   3    0.92    1.54
   0 -15  -1    3.16    1.28
   0 -14   8   11.94    1.63
   0 -13   9    9.28    1.44
   1 -15   3    8.49    1.64
   1 -14   6   54.18    2.36
   1 -13  -3   28.38    1.41
   2 -14   1   16.03    1.68
   2 -13  -2    2.50    1.50
   2 -12  -3   25.00    1.40
   4 -10   1    2.68    1.16
   4 -10   2   65.79    2.17
   4  -9  -1  235.77    2.75
   4  -8   3    2.18    0.95
  -3 -17   7   19.13    1.02
  -3 -16   9    3.25    0.63
  -2 -17   2    2.39    1.05
  -2 -17   5    5.33    0.99
  -2 -16   8    6.77    1.05
  -1 -15  -2    1.03    1.04
   0 -16   1   19.97    1.63
   0 -16   2   16.26    1.49
   0 -16   4    6.60    1.41
   1 -15   0   53.73    1.98
   1 -14  -2   20.50    1.56
   2 -11  -4   90.91    1.86
   3 -13   0    4.37    1.77
   3 -12   4   15.66    1.91
   3 -11  -3  105.07    2.27
   4  -9  -2   37.34    1.34
   4  -8  -2  108.65    1.80
  -2 -17   6    0.10    0.94
  -2 -16  -1    1.16    1.02
   1 -15   5    3.55    1.65
   2 -14  -1  128.10    2.61
   3  -9  -4    7.02    0.85
   4 -11  -1   53.36    2.02
   4 -11   1    8.77    1.48
   4 -11   2   54.12    2.12
   4 -10  -2   90.40    1.99
   4 -10   3   22.50    1.70
   4  -7   4   11.46    1.17
  -2 -17   1    8.90    1.07
  -1 -17   2   -1.10    1.13
  -1 -17   3    4.58    1.05
  -1 -17   4   16.58    1.28
  -1 -16  -1   30.58    1.49
   0 -16   0    4.54    1.26
   0 -15  -2   25.78    1.43
   1 -14   7    1.41    1.54
   2 -13  -3   18.69    1.47
   3 -11   6    1.42    2.27
   3 -10  -4   20.09    1.17
   4 -11   3    7.05    1.96
   4 -10   4   40.56    2.18
   4  -9  -3  203.94    2.62
   4  -8  -3   69.59    1.50
  -2 -15  10    2.09    0.71
  -1 -15   9    2.88    0.97
  -1 -14  10    4.77    0.94
   0 -16   6   45.17    1.80
   1 -15   6    3.96    1.73
   1 -14  -3    0.64    1.18
   1 -13  -4    3.01    1.30
   2 -15   0   14.26    1.86
   2 -15   1   54.64    2.14
   2 -15   2   18.27    1.79
   2 -15   3   68.97    2.55
   2 -14  -2    5.18    1.42
   3 -13  -2  101.61    2.59
   4 -12   0  254.74    3.59
   4 -12   2  131.84    3.15
   4 -11  -2   20.74    1.49
   4 -10  -3   65.75    1.92
  -3 -17   0    0.43    0.72
  -2 -17   0    1.11    0.88
  -2 -17   7   31.20    1.09
   0 -16  -1   20.57    1.40
   0 -15   8    3.91    1.19
   1 -16   1   30.59    1.67
   1 -16   4   15.74    1.69
   2 -15   4    4.82    1.96
   3 -11  -4   22.47    1.34
   4 -12   3    3.83    2.15
   5  -9   0    0.02    1.25
   5  -8   0  102.01    2.01
   5  -8   1   42.78    1.71
  -1 -17   6    9.44    1.05
  -1 -16   8    4.45    0.91
   0 -17   2   17.82    1.41
   0 -17   3   25.53    1.49
   0 -15  -3   18.40    1.41
   1 -16   0    9.43    1.33
   2 -15  -1   20.48    1.66
   2 -12   8   64.63    2.23
   2 -11  -5   12.21    1.09
   3 -14  -1    6.95    1.60
   4 -13   0   17.55    2.05
   4 -13   1  165.67    3.43
   4 -12  -2  447.96    4.48
   4 -11  -3   10.40    1.30
   4 -10   5   32.84    1.97
   4  -9  -4  110.78    2.05
   4  -8  -4   12.28    1.02
   5 -10   0   24.60    1.61
   5 -10   1   24.84    1.88
   5  -9   2    8.69    1.69
   5  -7   0    9.15    0.97
   5  -7   1   28.50    1.26
  -1 -17   0    3.54    0.95
   0 -17   1    5.63    1.23
   0 -17   4    7.08    1.14
   0 -16   7   -0.57    1.09
   1 -16  -1    1.68    1.39
   1 -15   7    8.31    1.53
   3 -14  -2    4.93    1.78
   3 -13  -3   50.45    1.94
   3 -10  -5    1.89    1.05
   4 -13  -1   68.87    2.35
   4 -10  -4    8.25    1.35
   5 -11   0    0.57    1.79
   5 -10   2   72.87    2.28
   5  -9  -2    9.87    1.17
   5  -8  -2   60.02    1.60
   5  -7   2   23.01    1.21
  -2 -18   3    1.33    0.70
   0 -16  -2   17.63    1.39
   1 -15  -3   45.38    1.83
   2 -16   1   -1.40    1.53
   2 -16   2   17.68    1.84
   2 -12  -5    4.56    1.37
   3 -15   1    3.32    1.64
   5 -11  -1  148.51    2.88
   5 -11   1   12.55    1.71
   5 -10  -2  152.55    2.67
   5  -9   3   16.18    1.56
  -1 -17   7    5.84    0.84
   2 -16   0    7.79    1.43
   2 -14   7    6.12    1.80
   3 -15   0    5.78    1.64
   3 -13   6    1.53    2.03
   3 -12   7    7.16    1.95
   3 -11  -5   33.65    1.47
   4 -11  -4  111.39    2.33
   5 -12   0   26.54    2.22
   5 -11  -2  182.59    3.07
   5  -8  -3   18.91    1.17
   5  -7   3   85.22    1.91
  -1 -18   3    3.68    0.84
  -1 -17  -1    0.90    0.87
   1 -17   1    1.06    1.25
   1 -17   2   11.87    1.25
   1 -17   3    8.16    1.25
   1 -16  -2    8.57    1.40
   2 -16   4   36.30    1.84
   4 -14   2   55.14    2.42
   4 -13  -3    4.36    1.70
   4  -9  -5  238.24    2.85
   5 -12  -1   11.13    1.74
   5 -12   1    0.45    1.72
   5  -8   4    4.84    1.62
   5  -6   3   18.02    1.26
   0 -17  -1    4.36    1.12
   0 -17   6    4.79    0.99
   0 -16   8    1.64    0.85
   0 -15   9    2.74    0.79
   1 -17   0    2.03    1.23
   1 -17   4    5.88    1.14
   2 -16  -1    2.78    1.24
   2 -15  -3   94.23    2.25
   3 -15   4    4.91    1.80
   3 -12  -5   31.34    1.60
   4 -14   3    4.34    1.98
   4 -12  -4  156.21    2.81
   4 -10  -5    0.11    1.14
   5 -12  -2   55.85    2.23
   5 -10   4    6.39    1.83
   5  -9  -4    1.08    1.25
   5  -8  -4  123.08    2.21
   5  -7   4    4.85    1.36
  -1 -18   1    0.12    0.73
   1 -15   8    0.54    0.89
   3 -13   7   46.72    2.31
   4 -11  -5    6.10    1.49
   5 -13  -1   22.88    1.99
   5 -13   1    5.62    1.87
   5 -12  -3    1.50    1.87
   5 -12   3    4.51    1.89
   5 -10  -4  105.25    2.31
   6 -10   0   60.82    2.43
   6  -9  -1    6.23    1.34
   6  -9   0   10.61    1.45
   6  -8  -1    0.12    1.11
   6  -8   0   88.24    2.14
   0 -18   2    0.54    0.88
   0 -18   3    5.51    0.86
   1 -17  -1   11.70    1.25
   1 -16   7   -0.63    0.96
   2 -16  -2    8.02    1.30
   3 -16   0    4.88    1.43
   4 -15   0    4.29    1.66
   4 -13  -4   89.69    2.61
   5 -13  -2   -0.66    1.65
   5 -11  -4   56.39    2.06
   6 -11   0    1.60    2.00
   6 -10  -2  332.85    4.08
   6 -10  -1   30.82    1.89
   6 -10   1   24.44    1.89
   6  -9  -2    2.70    1.30
   6  -8  -2   15.72    1.31
   6  -8   1    8.44    1.37
   6  -7  -1   50.90    1.63
   6  -7   0   86.43    1.98
   0 -18   1   -0.02    0.80
   1 -16  -3   18.82    1.30
   2 -17   1    3.71    1.15
   2 -17   3    6.13    1.29
   2 -14   8    8.62    1.28
   3 -16  -1    8.47    1.41
   3 -15  -3   10.86    1.50
   4 -15   2    0.09    1.69
   5 -14   0   31.44    2.42
   5 -13   3    2.55    2.40
   6 -11  -2   47.91    2.44
   6 -11  -1    3.18    1.67
   6 -11   1    4.65    1.81
   6  -9  -3   50.42    1.84
   6  -9   2    9.41    1.65
   6  -8  -3    3.86    1.30
   6  -7  -2   29.64    1.37
   6  -7   1    6.36    1.16
   2 -17   0   -0.23    1.07
   2 -16   6   19.94    1.46
   2 -15  -4    4.36    1.20
   4 -10  -6   18.58    1.46
   5 -14   1    1.98    1.81
   5 -13  -3   15.46    1.78
   5 -10  -5   25.55    1.54
   5  -9  -5    8.67    1.16
   6 -12   0    4.35    1.88
   6 -10  -3    8.32    1.52
   6  -7   2    6.88    1.24
   6  -6   0    6.38    1.02
   6  -6   1    9.81    1.26
   1 -17  -2   -1.28    0.98
   2 -17  -1    7.78    1.33
   3 -14   7    1.46    1.47
   4 -13   6    7.62    1.93
   5 -14   2    4.15    1.91
   5 -11  -5   52.05    2.00
   6 -12  -2    4.78    1.77
   6 -12   1    1.89    1.89
   6 -10   3    5.39    1.84
   6  -8   3    3.58    1.58
   1 -18   1    3.82    0.93
   1 -18   2    4.31    0.69
   3 -15  -4    6.72    1.55
   4 -16   1    3.80    1.64
   4 -15  -3   28.28    2.03
   4 -15   4    4.45    1.73
   5 -12   5    8.50    2.54
   6  -8  -4   76.02    1.96
   6  -6   2  181.91    2.66
   1 -18   0   25.68    1.21
   2 -17  -2    1.05    1.11
   2 -17   5   20.57    1.27
   3 -17   1    4.29    1.20
   3 -17   2    0.34    1.30
   3 -16   5    0.54    1.35
   4 -16   2   12.56    1.56
   5 -15  -1   22.74    2.15
   5 -15   0    5.53    1.71
   5 -15   1   18.69    2.13
   5 -12  -5   19.48    1.72
   6  -7  -4   23.14    1.32
   7  -9  -1   49.85    2.38
   3 -17   3   17.03    1.39
   4 -16  -2   15.85    1.69
   4 -16   3    8.72    1.71
   4 -14   6    8.46    1.88
   5 -15  -2    2.68    1.86
   5 -13   5    2.31    2.53
   5 -11   6    1.59    2.11
   5 -10  -6   40.72    1.83
   5  -9  -6   45.01    1.65
   6 -13  -3   15.03    1.94
   6 -12  -4   19.39    2.01
   6  -9  -5  118.05    2.57
   6  -8  -5   27.52    1.63
   7 -11  -1    5.71    2.19
   7 -10  -2   26.20    2.01
   7 -10   0   12.09    1.93
   7  -9  -2   78.70    2.43
   7  -9   0   11.63    1.74
   7  -8  -2    1.96    1.37
   7  -8  -1    2.71    1.38
   7  -8   0   34.49    1.85
   4 -15  -4   13.38    1.58
   5 -14  -4  171.29    3.20
   5 -13  -5   76.87    2.41
   6 -11  -5    7.51    1.70
   7 -11  -2   43.13    2.38
   7 -10  -3    1.62    1.67
   7 -10   1   28.98    2.20
   7  -9  -3   70.89    2.33
   7  -8  -3   68.74    2.17
   7  -8   1    4.88    1.63
   7  -7  -2    0.69    1.16
   7  -7  -1   63.10    1.98
   7  -7   0   -0.38    1.31
   2 -18   0    2.53    0.91
   2 -18   1    0.45    0.65
   2 -18   1    0.30    0.43
   2 -18   2    0.56    0.59
   3 -17  -2    3.49    1.18
   3 -17   4    4.24    1.17
   3 -15  -5   20.64    1.60
   4 -16   4    5.77    1.56
   5 -15   3    3.36    1.73
   5 -12  -6    2.93    1.72
   5 -12   6   52.69    2.62
   6 -14  -2    5.93    1.87
   6 -13   3   13.92    2.24
   6 -12   4    8.31    2.69
   7 -12  -1   45.45    2.49
   7 -12   0    7.11    2.10
   7 -11  -3    4.06    1.86
   7  -9  -4    2.33    1.70
   7  -7  -3    7.80    1.29
   7  -7   1   19.54    1.61
   2 -17  -3    3.86    1.03
   3 -16   6    8.43    1.13
   4 -17   0   -0.18    1.24
   4 -16  -3   21.34    1.53
   5 -16   0   28.43    1.78
   5 -16   1    1.90    1.61
   6 -14   2    9.40    2.03
   6 -12  -5   52.30    2.32
   7 -11  -4   22.16    2.32
   7  -8   2   77.98    2.54
   7  -6  -2   60.69    1.85
   7  -6  -1    8.61    1.25
   4 -17  -1    5.40    1.23
   4 -17   2    5.53    1.25
   5 -16   2   12.04    1.70
   5 -15  -4   23.11    1.97
   5 -14  -5   27.29    1.89
   6 -15  -1    2.04    1.96
   6 -11   5    2.07    2.43
   6 -10  -6   69.05    2.23
   7 -13  -1    7.75    2.10
   7 -13   0    9.30    2.17
   7  -7  -4    3.36    1.21
   7  -6   1    3.07    1.26
   3 -17  -3    1.10    1.04
   4 -14  -6   18.23    1.73
   5 -10  -7    1.70    1.18
   6 -15   1    8.91    1.69
   6 -14  -4   32.40    2.07
   6  -7  -6    8.39    1.31
   7 -12  -4   14.69    2.06
   7 -10  -5    1.26    1.60
   7  -8  -5   21.37    1.61
   7  -5  -1   87.59    2.15
   4 -16  -4    4.09    1.25
   5 -16  -3   14.71    1.67
   5 -16   3    1.07    1.53
   5 -11  -7    7.48    1.41
   6 -12   5    0.33    2.33
   7  -7  -5   83.04    2.35
   7  -7   3   28.44    2.16
   7  -6  -4    2.35    1.08
   7  -5  -2   41.00    1.61
   7  -5   0   94.20    2.13
   8 -11  -2    3.46    2.38
   8 -11  -1   18.35    2.70
   8 -10  -3  105.64    3.34
   8 -10  -2    5.07    1.99
   8 -10  -1   24.37    2.28
   8 -10   0  112.26    3.58
   8  -9  -3   15.17    2.23
   8  -8  -2   10.17    1.74
   8  -8  -1   44.27    2.24
   6 -14  -5   -0.99    1.83
   7 -13   2   14.19    2.18
   7 -12  -5    4.73    1.81
   7  -5   1   12.31    1.29
   8 -11  -3   46.35    2.61
   8  -9  -4    6.81    2.12
   8  -8  -3   59.38    2.39
   8  -7  -2    3.95    1.74
   8  -7  -1   28.70    2.11
   5 -15  -5   29.81    1.71
   5 -14  -6   18.25    1.70
   6 -16  -1   -0.69    1.43
   6 -16   0   20.52    1.83
   6 -15  -4    2.71    1.79
   6 -10  -7   18.83    1.68
   7 -14  -3    1.38    1.81
   7 -14   1    2.41    1.95
   7 -11  -6   33.82    2.43
   7 -10  -6  147.62    3.19
   7  -8  -6  116.13    2.67
   7  -6  -5   63.17    2.05
   8  -7  -3  120.51    2.84
   8  -7   0    6.14    1.71
   5 -17  -1    6.58    1.16
   5 -16  -4   28.02    1.56
   5 -16   4    1.85    1.18
   5 -14   6    4.12    1.13
   6 -16  -2    6.80    1.40
   8  -9  -5    4.95    2.11
   8  -6  -2   62.91    2.36
   8  -6  -1   11.25    1.89
   5 -17  -2    6.59    1.12
   5 -17   2    1.99    0.98
   6 -16  -3   10.40    1.54
   6  -7  -7   69.35    1.90
   7 -15  -1   14.69    1.78
   7 -12  -6   75.37    2.73
   7 -12   4    3.44    2.68
   8 -13  -3   82.49    2.97
   8 -13  -2    6.22    2.09
   8 -13  -1   28.47    2.40
   8 -13   0    2.59    2.33
   8 -12   1   10.48    2.25
   8 -11  -5   10.44    2.06
   8  -8  -5    5.41    1.64
   8  -6  -3   50.15    2.00
   6 -16   2    7.35    1.35
   6 -15  -5   20.31    1.64
   6 -14  -6   24.15    1.83
   7 -15  -3    4.49    1.53
   7 -15   1   14.08    1.93
   7 -10  -7   26.23    2.19
   7  -9  -7    4.21    1.84
   8  -7  -5    3.21    1.43
   4 -17  -4    1.07    0.90
   5 -17  -3    6.68    1.04
   5 -15  -6    1.90    1.38
   6 -13  -7    2.19    1.80
   6  -6  -7    6.34    1.25
   7 -15  -4    0.40    1.59
   7 -13  -6    6.32    1.85
   7  -8  -7  110.36    2.63
   8 -14  -2   60.09    2.53
   8 -11  -6    0.22    2.21
   8  -7   2    6.95    1.81
   8  -6   1    1.89    1.66
   8  -5  -1  250.47    3.66
   9 -10  -3    6.62    2.18
   9 -10  -1   65.16    3.02
   9  -9  -2   46.00    2.66
   9  -9  -1  207.00    4.24
   9  -8  -2    4.06    2.32
   6 -16  -4   18.00    1.48
   7 -15   2    0.40    1.81
   8 -14  -3   10.30    1.88
   8 -13  -5   23.10    2.21
   8  -8   3   -0.66    2.21
   8  -6  -5   41.95    1.93
   9 -10  -4   36.13    2.57
   9 -10   0   38.57    2.79
   9  -9  -4  142.28    3.60
   9  -9   0   66.74    2.95
   9  -8  -4    7.26    2.29
   9  -8  -3    3.04    1.97
   6 -17  -1    5.16    1.00
   6 -17   0    0.87    1.00
   6 -16   3    0.42    0.58
   6 -11  -8    7.46    1.45
   7 -16  -2    1.60    1.41
   7 -16  -1   10.42    1.40
   7 -16   0   30.33    1.77
   7 -14  -6    3.96    1.81
   8 -14  -4   16.31    1.90
   8 -14   1    3.10    2.02
   9 -12  -3   20.53    2.42
   9 -10  -5   86.26    3.16
   9  -9  -5   83.57    3.05
   9  -7  -3  180.58    3.68
   5 -17  -4    1.45    0.90
   6 -15  -6    1.44    1.27
   6 -14  -7    6.57    1.58
   6  -7  -8    4.32    1.30
   7 -16  -3   -0.43    1.32
   7 -15  -5   17.96    1.62
   8 -15  -2   10.46    1.83
   8 -11  -7   65.57    2.96
   8 -10  -7   16.66    2.05
   8  -9  -7  298.21    4.42
   8  -7   3    4.82    1.83
   8  -5   1   87.62    2.44
   9 -12  -4   73.65    3.05
   9 -12   0    4.23    2.15
   9  -7  -4   37.11    2.32
   6 -17  -3   10.72    1.19
   6 -16  -5   11.94    1.24
   7 -16   1    2.22    1.15
   7 -15   3   13.11    1.72
   7 -14   4   27.83    1.97
   7 -10  -8    2.43    1.68
   7  -8  -8  175.91    3.38
   8 -15  -1   23.86    1.78
   8 -15   0    1.86    1.63
   8  -8  -7    8.01    1.78
   8  -6  -6   31.69    1.82
   8  -4  -3    7.26    1.51
   8  -4  -1   55.71    1.93
   9 -13  -4   21.89    2.47
   9 -13  -3   46.71    2.55
   9 -13  -1    2.09    1.90
   9  -8   1   52.23    2.68
   9  -7  -5   16.32    1.97
   9  -6  -3    5.58    1.65
   9  -6  -2  117.65    3.06
   8  -4   0   50.00    1.92
   9 -13   0   10.48    1.97
   9 -12   1    2.27    1.98
   9  -8  -6    9.21    2.03
   9  -7   1  133.68    3.39
   9  -6  -4   12.76    1.84
   7 -15  -6    2.40    1.47
   7  -7  -8  131.93    2.76
   8 -15   1   11.72    1.72
   8 -14  -6   25.17    2.15
   9 -14  -3    0.07    1.64
   9 -14  -2   17.08    1.84
   9 -12  -6    5.42    2.06
   9  -5  -3   28.72    2.15
   9  -5  -2    6.96    1.96
  10  -9  -4    7.03    2.64
  10  -9  -3   25.49    2.58
  10  -8  -3    7.38    2.61
   8 -15  -5    7.24    1.61
   8 -13  -7   39.87    2.20
   8  -6  -7   13.66    1.63
   8  -5  -6   15.58    1.55
   8  -4   1    4.73    1.44
   9 -14  -4    3.71    1.63
   9 -10  -7   24.90    2.26
   9  -9  -7    1.28    1.89
   9  -5  -4   27.19    2.17
   9  -5  -1   57.31    2.37
  10 -11  -2    3.96    2.29
  10  -9  -5   23.66    2.85
  10  -9  -1   37.78    2.70
  10  -8  -4  126.33    3.63
  10  -8  -2   62.11    3.00
  10  -8  -1   53.32    3.13
   6 -16  -6   16.51    1.32
   7 -13  -8    0.26    1.68
   8 -16  -3    0.18    1.16
   8 -16  -2    0.38    1.04
   8 -16  -1    0.53    1.11
   9 -14   0   16.69    1.79
   9  -8  -7    7.51    1.93
   9  -7   2   16.04    2.10
  10 -12  -4   49.91    2.71
  10 -12  -3   11.37    2.19
  10 -12  -2   32.41    2.49
  10 -11  -5   47.33    2.76
  10  -8  -5   70.79    3.04
  10  -7  -4   13.13    2.26
  10  -7  -3   21.12    2.39
  10  -7  -2   97.02    3.31
   8 -14   3    0.47    1.24
   8 -14   3    0.55    0.75
   8 -12  -8    5.87    1.80
   8  -3  -1  259.93    3.56
   9 -12  -7    2.41    1.95
   9  -9   3   34.79    2.73
  10 -13  -3   17.99    2.31
  10 -11  -6    6.44    2.57
  10 -11   0    9.00    2.30
  10 -10  -6   38.33    2.73
  10  -9  -6   98.63    3.43
  10  -7  -5   13.59    2.26
   8 -16  -4    1.45    1.02
   8 -15  -6   10.14    1.46
   8  -5  -7  252.71    3.67
   8  -4  -6   34.08    1.78
   9 -15  -3    8.08    1.38
   9 -10  -8    5.68    2.40
   9  -9  -8   25.69    2.56
   9  -4  -3    5.61    1.51
   9  -4  -2   34.11    2.00
   9  -4  -1   46.47    2.39
  10 -13  -2    1.75    1.71
  10 -10   1    9.22    2.56
  10  -9   1   31.56    2.88
  10  -8  -6  128.65    3.68
  10  -6  -4  204.09    4.13
  10  -6  -3   17.02    2.23
   7 -16  -6    2.68    1.04
   8 -10  -9   -0.02    2.00
   9 -14  -6   20.95    1.75
   9 -13  -7   25.37    1.90
   9  -8  -8   79.94    2.90
   9  -6  -7    7.42    1.71
  10 -13  -5   30.93    2.20
  10 -13  -1    8.45    1.82
  10 -12  -6   32.41    2.41
  10  -9  -7   98.21    3.40
  10  -7  -6   46.59    2.72
  10  -6  -1    5.72    2.10
   8 -16  -5   -0.63    0.95
   8  -8  -9  155.95    3.56
   8  -3   1    9.15    1.37
   9 -15  -5   12.30    1.53
   9 -15   0    6.28    1.28
   9 -12  -8   33.06    2.50
   9  -7  -8   12.25    2.30
   9  -4  -5    3.68    1.53
   9  -4   0    1.20    1.56
  10 -14  -3    6.96    1.68
  10 -11  -7   29.80    2.48
  10  -8  -7   28.21    2.53
  10  -6   0   49.98    3.02
  10  -5  -3   95.56    3.09
  11 -10  -4   12.70    2.50
  11 -10  -3    7.24    2.42
  10 -14  -4   19.28    1.72
  10 -14  -2    1.97    1.42
  10 -13  -6    1.14    1.61
  10 -12  -7   10.98    1.96
  10  -6  -6    5.92    2.04
  10  -5  -4   68.91    2.79
  10  -5  -1   78.96    3.19
  11 -11  -5    4.32    2.48
  11 -11  -4   18.45    2.41
  11 -11  -3    2.99    2.14
  11 -10  -2   25.28    2.63
  11  -8  -5    1.43    2.31
  11  -8  -3    1.39    2.35
  11  -8  -2   19.66    2.55
   7  -6  -9   48.83    1.93
   8 -15  -7    1.07    1.11
   8  -4  -7   35.55    1.79
   9 -14  -7    1.97    1.38
   9  -6  -8   26.10    2.12
   9  -4  -6   13.75    1.69
  10 -14  -5    2.61    1.40
  10 -14  -1    1.68    1.44
  11 -10  -1    8.52    2.23
  11  -9  -1   13.82    2.57
  11  -8  -6    5.29    2.76
  11  -7  -4    7.63    2.42
  11  -7  -2    8.49    2.77
   8  -3  -6    1.21    1.26
   9 -15  -6   -0.15    1.10
   9  -8  -9   84.02    2.90
  10 -13  -7   14.31    2.01
  10 -13   1    1.27    1.75
  10 -11   2    8.65    2.08
  10  -8   2    1.87    1.98
  10  -6   1    9.59    2.14
  10  -5  -6   18.54    2.13
  10  -4  -3   10.37    2.26
  11 -12  -2   14.69    2.04
  11 -11  -6    2.47    2.14
   8  -6  -9    3.18    1.49
   9  -7  -9   26.64    2.53
   9  -3  -5  256.01    3.99
   9  -3   0   13.97    1.93
  10 -15  -3   20.70    1.47
  10 -14  -6    9.97    1.47
  10  -7  -8    1.88    2.00
  10  -4  -4   28.12    2.20
  10  -4  -2  174.22    3.78
  11 -13  -3   10.93    1.70
  11 -12  -6   32.81    2.27
  11 -11  -7   14.50    2.51
  11 -10  -7    5.05    2.29
  11  -9   0   19.36    2.47
  11  -7  -1   27.14    2.78
  11  -6  -3   27.62    2.63
  11  -6  -2   69.00    3.48
   9 -12  -9    1.90    1.55
   9  -4  -7    4.85    1.53
  10 -15  -4    8.45    1.20
  10  -9  -9   37.76    2.90
  10  -5  -7   26.49    2.52
  10  -4  -5   55.03    2.61
  10  -4  -1    9.29    1.96
  11 -13  -5   29.08    1.93
  11 -13  -2   11.29    1.61
  11 -11   0   14.61    2.14
  11  -7  -7   30.75    3.01
  11  -6  -6   99.41    3.74
   8  -8 -10    4.24    1.70
   8  -3  -7   16.47    1.51
   9 -14  -8    2.48    1.28
   9  -3  -6   10.34    1.60
  10 -15  -5    3.91    1.06
  10 -14  -7    2.33    1.36
  10 -13  -8    0.82    1.57
  10 -11  -9   58.05    2.75
  10 -10  -9   17.68    2.24
  10  -8  -9   57.24    2.79
  10  -6  -8   72.72    2.98
  10  -5   1    8.36    1.95
  10  -4  -6   78.52    2.86
  11 -12  -7   -0.08    1.62
  11 -10  -8   43.16    2.84
  11  -6  -1   14.87    2.40
  11  -5  -4   16.63    2.41
  11  -5  -3   25.62    2.52
  12 -10  -5   25.25    2.80
  12 -10  -4    4.46    2.52
  12  -9  -4    8.72    2.47
   8  -7 -10   32.57    2.27
   9 -13  -9    3.34    1.47
   9  -9 -10    1.76    2.14
   9  -2  -3   53.51    2.17
   9  -2  -2   39.31    1.94
  10  -7  -9    8.24    2.44
  10  -4   0   13.35    1.99
  10  -3  -3   32.42    2.46
  11 -14  -4   23.18    1.64
  11 -14  -3    0.90    1.23
  11 -13  -1   15.40    1.47
  11 -11  -8   17.76    2.08
  11  -6  -7   52.68    2.95
  11  -5  -2   12.32    2.36
  12 -11  -3   13.18    2.29
  12 -10  -6    5.14    2.50
  12 -10  -3    7.56    2.16
  12  -9  -6    3.74    2.37
  12  -8  -3   18.19    2.57
   9 -11 -10    3.29    1.85
   9  -8 -10    8.32    1.95
   9  -4  -8  240.60    3.97
  10  -3  -5    8.06    2.19
  10  -3  -4   11.29    1.89
  10  -3  -2    9.17    1.89
  11 -14  -5    5.02    1.22
  11 -14  -2    4.28    1.25
  11 -13  -7    4.45    1.64
  11  -5  -6    3.36    2.20
  11  -5  -1    6.31    2.51
  12 -11  -6    7.23    1.99
  12 -10  -2    3.13    2.02
  12  -7  -5   26.20    2.76
  12  -7  -4   11.15    2.53
   9  -3  -7    3.32    1.46
   9  -2  -5   77.83    2.48
  10  -6  -9   24.73    2.36
  11 -14  -6    7.64    1.38
  11 -13   0   -1.05    1.38
  11 -10  -9    0.29    2.27
  11  -7   1    3.50    2.10
  11  -6  -8   26.17    2.99
  11  -5  -7    8.68    2.62
  11  -4  -5    3.06    2.59
  12 -12  -5    1.98    1.59
  12 -10  -7    2.75    2.12
  12  -9  -7    3.53    2.30
  12  -7  -6    2.72    2.39
  12  -6  -5    5.06    2.89
  12  -6  -4   48.14    3.56
  10 -14  -8    6.34    1.27
  10 -10 -10   41.95    2.62
  10  -3  -6    8.67    1.89
  11 -11  -9   17.85    2.17
  11  -5   0    2.96    2.46
  11  -4  -2   21.29    2.39
  12 -12  -6   15.18    1.79
  12 -12  -2    2.03    1.66
  12  -7  -7    7.26    2.45
  12  -6  -6   20.31    3.04
  12  -6  -3   13.22    2.49
   9  -6 -10   12.01    2.01
   9  -2  -6  136.22    3.06
  10 -13  -9    6.13    1.38
  10  -7 -10    8.03    2.27
  10  -4  -8    1.94    1.79
  10  -3   0   -1.90    2.00
  11 -13  -8    1.34    1.37
  11  -4  -1   19.22    2.69
  12 -13  -5    4.21    1.38
  12 -12  -7   10.15    1.76
  12 -11  -1    7.20    1.77
  12 -10  -8   23.59    2.31
  12  -6  -2   37.04    2.82
   9  -3  -8  151.26    3.25
  10  -2  -4  159.13    3.52
  10  -2  -2   19.99    2.28
  11 -14  -7    1.99    1.00
  11 -12  -9    0.94    1.59
  11  -5  -8    6.28    2.25
  11  -3  -4   34.45    2.81
  12  -7  -8    8.76    2.43
  12  -6  -7    0.97    2.38
  12  -5  -6    7.09    3.01
  12  -5  -5    6.10    2.47
  12  -5  -4    3.44    2.39
  12  -5  -3    4.25    2.30
  13  -9  -5   20.29    2.68
   9  -2  -7   55.51    2.41
   9  -1  -3  101.98    2.68
  10  -6 -10  264.16    4.72
  11 -10 -10  120.06    3.34
  11  -3  -5   31.31    2.48
  11  -3  -3   56.37    2.84
  12 -10   0   17.55    2.04
  12  -9  -9   14.14    2.49
  12  -6  -8    6.96    2.83
  13 -10  -6    2.30    2.15
  13  -9  -6   15.22    2.20
  13  -8  -5   14.29    2.54
  13  -8  -4    0.93    2.24
   9  -5 -10   22.04    1.98
   9  -1  -5    8.03    1.51
  11  -7 -10   58.00    3.33
  11  -4  -8   36.91    3.05
  11  -4   0    8.13    2.18
  11  -3  -6   20.59    2.38
  11  -3  -2   51.12    2.77
  12 -13  -7    0.53    1.27
  12 -11   0    4.69    1.60
  12 -10  -9    4.74    1.84
  12  -7   0   12.10    2.25
  12  -5  -7    3.20    2.39
  12  -4  -4   64.02    3.59
  13 -11  -6   20.03    2.02
  13 -11  -5    3.12    1.60
  13  -9  -7    8.42    2.20
  13  -8  -7    3.44    2.34
  13  -7  -5    2.90    2.48
  13  -7  -4   10.34    2.54
  10  -5 -10   39.32    2.83
  10  -3  -8    2.71    1.75
  11 -11 -10    3.37    1.56
  11  -3  -7  138.05    3.99
  12 -11  -9    5.19    1.71
  12  -5  -8    9.35    2.87
  12  -5  -1   34.40    3.07
  13 -11  -3    2.64    1.67
  13  -8  -2    7.15    2.47
  13  -7  -3   84.09    3.35
   8  -4 -10  128.20    2.85
   9  -3  -9  138.02    3.17
   9  -1   0    6.23    1.58
  10  -7 -11   11.23    2.29
  10  -2  -7   37.12    2.32
  11  -6 -10    7.37    2.19
  12  -6  -9    9.63    2.41
  12  -6   0    2.75    2.09
  12  -4  -7   33.35    3.18
  13 -12  -6    6.13    1.37
  13 -12  -5    3.74    1.33
  13 -12  -4    3.58    1.31
  13 -10  -2    8.59    1.77
  13  -9  -8   -0.36    1.97
  13  -8  -8    3.12    2.28
  13  -7  -2    2.02    2.52
  11  -4  -9   46.00    2.75
  11  -2  -5   -1.46    1.95
  11  -2  -4   34.32    2.46
  11  -2  -3   21.67    2.38
  12 -13  -8    5.37    1.17
  12 -12  -9    3.72    1.20
  12 -10 -10   20.59    2.26
  12  -9 -10    1.50    1.89
  13 -11  -8    4.63    1.61
  13 -11  -2    0.91    1.41
  13  -7  -8    4.73    2.44
  13  -5  -6   17.31    3.08
  13  -5  -5   21.32    2.78
   9  -1  -7   18.19    1.93
  10  -6 -11   32.99    2.57
  10  -3  -9    3.24    1.87
  10  -1  -5  129.59    3.31
  10  -1  -2   49.75    2.36
  11 -10 -11   28.41    2.05
  11  -9 -11   44.09    2.33
  11  -2  -6   19.71    2.30
  11  -2  -2   36.23    2.50
  12  -4  -8   55.74    3.14
  12  -3  -6    7.77    2.45
  12  -3  -5   25.01    2.69
  12  -3  -4    5.58    2.30
  12  -3  -3   10.12    2.91
  13 -12  -7    1.27    0.96
  13 -12  -7    1.22    0.66
  13 -12  -3    2.27    0.98
  13 -10  -9    5.50    1.88
  13  -9  -9   43.65    2.48
  13  -9  -1   16.96    2.13
  13  -8  -9   20.19    2.41
   9   0  -4  202.04    3.58
   9   0  -2    4.64    1.68
  10  -1  -6   33.67    2.20
  10  -1  -1   31.14    2.38
  11  -2  -7   17.34    2.61
  12  -6 -10   72.90    3.10
  12  -3  -7    1.66    2.83
  13  -7  -9    3.86    2.33
  13  -7  -1   -0.31    2.24
  14  -9  -6   18.68    2.24
  14  -9  -5    6.63    1.93
   8  -3 -10   12.87    1.78
   8  -1  -8  266.69    3.92
   9  -2  -9   11.05    1.95
  11  -2  -1   14.64    2.19
  12  -3  -2    1.94    2.09
  13 -12  -8    1.94    0.93
  13 -12  -8    1.29    0.62
  13 -11  -9    2.34    1.31
  13  -5  -8   18.95    2.69
  13  -5  -2    1.75    2.63
  13  -4  -6    6.74    2.55
  13  -4  -5   20.81    2.94
  14  -9  -4    3.36    1.92
  14  -7  -5   12.66    2.29
   9  -3 -10    7.37    1.79
   9  -1  -8   28.27    2.10
  10  -1  -7   79.39    2.80
  11  -4 -10   92.30    3.28
  11  -2  -8   12.35    2.51
  11  -1  -5    5.57    2.34
  11  -1  -4  146.29    3.90
  12  -9 -11   24.90    2.25
  12  -3  -8   16.22    2.57
  12  -2  -5   71.60    3.55
  12  -2  -4  106.93    3.82
  13  -8 -10   21.37    2.17
  13  -6  -1    3.23    2.01
  13  -4  -7    3.26    2.44
  14 -10  -4    1.19    1.36
  14  -9  -8    7.99    2.01
  14  -8  -8   10.72    2.15
  14  -7  -4    9.45    2.10
  14  -6  -6   -0.32    2.66
  14  -6  -5    3.28    2.65
   9   0  -6   43.15    2.11
  10  -2  -9   24.51    2.19
  12 -10 -11    0.44    1.36
  12  -3  -1    2.11    2.41
  12  -2  -6   52.44    3.03
  12  -2  -3   14.73    2.82
  13 -10 -10    3.09    1.54
  14 -11  -6    3.02    0.98
  14 -11  -5   15.98    1.42
  14 -10  -8    8.98    1.51
  14  -8  -3    2.87    1.80
  14  -7  -8    3.21    2.12
  14  -7  -3   26.94    2.52
  14  -6  -7    6.20    2.36
  14  -6  -4   14.48    2.66
  10  -4 -11   36.82    2.57
  10  -1  -8    6.07    2.04
  11  -1  -2   10.40    2.16
  12  -4 -10    7.62    2.72
  12  -3  -9   25.65    2.97
  12  -2  -7    7.38    2.42
  13 -12  -9    4.43    0.89
  13 -11 -10    4.92    1.27
  13  -6 -10    5.04    2.28
  13  -5  -1    4.62    2.41
  13  -3  -6    9.38    2.59
  13  -3  -5  106.36    3.82
  13  -3  -4   17.04    2.91
  14  -9  -9    2.10    1.80
  14  -7  -9    6.81    2.39
  14  -6  -8   20.74    2.47
  14  -5  -7   34.14    3.20
  14  -5  -6   22.69    2.78
  14  -5  -5  107.98    3.96
  11  -7 -12   19.32    2.29
  11  -3 -10    8.20    2.16
  11  -2  -9   65.90    2.89
  11  -1  -7    9.37    2.17
  13  -4  -9   14.90    2.61
  13  -3  -7   48.61    3.12
  13  -3  -3   48.34    3.36
  14 -11  -8    2.18    1.12
  14 -10  -9    3.79    1.45
  14  -8  -2    4.86    1.71
   8  -2 -10   13.12    1.50
   8  -1  -9  147.67    2.91
   9  -2 -10   14.51    1.76
   9  -1  -9   16.70    1.73
  13  -9 -11   16.31    1.79
  13  -8 -11    1.11    1.77
  13  -3  -8   42.99    3.07
  14  -9  -2    2.87    1.37
  14  -8 -10   10.78    2.02
  14  -5  -8    2.67    2.39
   8   0  -8  135.66    2.98
   9   1  -5    8.73    1.81
   9   1  -3  103.32    2.65
  10  -1  -9   47.51    2.74
  11  -1  -8    9.05    2.10
  12  -8 -12  102.34    2.89
  12  -7 -12   18.16    2.25
  12  -2  -1  165.42    4.07
  12  -1  -6    0.62    2.21
  12  -1  -5    1.55    2.19
  12  -1  -4    0.19    2.18
  13  -6 -11   31.12    2.53
  13  -4  -1   38.13    2.46
  13  -2  -5    9.44    2.82
  14 -11  -9    3.17    1.10
  14  -7 -10   25.81    2.23
  14  -5  -3   29.97    2.53
  14  -4  -4   77.87    3.55
  15  -8  -7    0.37    1.68
  15  -8  -6    0.44    1.58
   9   0  -8    3.22    1.52
  11  -2 -10   18.19    2.59
  11   0  -6   94.43    3.18
  12  -6 -12   46.36    2.70
  12  -4 -11    7.81    2.21
  12  -2  -9   15.03    2.48
  12  -1  -7    2.95    2.27
  12  -1  -3   22.19    2.42
  13  -3  -9   48.10    3.03
  14  -6 -10    1.74    2.02
  15  -9  -7    9.66    1.39
  15  -9  -5    3.78    1.34
  15  -8  -5    0.01    1.42
  15  -7  -8   26.21    2.35
  15  -7  -7    9.70    1.82
  15  -7  -6    3.25    1.72
   9   1  -6   44.19    2.11
   9   1  -1   47.59    1.91
  10   1  -4   14.96    2.11
  11  -3 -11   16.08    2.20
  11  -1  -9   31.17    2.43
  12  -1  -2    3.31    2.47
  13  -5 -11    8.57    2.17
  13  -2  -8   20.24    3.04
  13  -2  -3   51.51    3.23
  14  -5 -10    0.37    2.41
  14  -4  -9   19.59    2.99
  15 -10  -7    2.00    1.01
  15  -6  -8   18.44    2.42
  15  -6  -7    1.38    1.84
  15  -6  -6   19.84    2.21
  15  -6  -5    2.49    2.13
  10   1  -5  143.44    3.35
  12  -1  -8   10.19    2.41
  13  -8 -12   23.75    1.98
  13  -3 -10   15.31    2.84
  14  -9 -11    0.49    1.28
  14  -8 -11   17.74    1.84
  14  -7 -11   16.06    1.94
  15  -8  -9    6.50    1.47
  15  -7  -4    1.72    1.42
  15  -5  -7    8.55    2.37
  15  -5  -6   -0.89    2.21
   8  -1 -10   20.44    1.52
   9   1  -7   19.32    1.73
  11  -4 -12    6.32    1.86
  11   0  -8  476.91    6.12
  12  -3 -11   25.43    2.48
  13  -9 -12   -0.44    1.22
  13  -6 -12    4.35    2.12
  13  -2  -9   15.37    2.51
  13  -1  -6   11.72    2.49
  13  -1  -5    9.76    2.82
  14  -6 -11    7.10    1.85
  14  -4 -10   29.47    2.93
  15  -6  -9    1.92    1.86
  15  -6  -4   12.02    1.85
  15  -5  -5   33.33    2.33
  10   1  -7   81.46    3.02
  11  -2 -11    1.77    2.28
  11  -1 -10   20.29    2.48
  12  -1  -9   57.89    3.01
  12  -1  -1   68.35    2.91
  12   0  -6   58.86    3.00
  12   0  -4    3.04    2.16
  13  -1  -7   24.46    2.70
  13  -1  -4   27.43    2.60
  14 -10 -11    2.26    1.00
  14  -4  -2   19.73    2.06
  15  -8 -10    5.26    1.31
  15  -7 -10    7.21    1.62
  15  -7  -3    2.63    1.34
  15  -5  -9   37.59    2.47
  15  -4  -7   26.47    2.73
  15  -4  -6   21.64    2.60
   9   2  -4   11.18    1.81
  10  -3 -12   45.85    2.30
  11   1  -5    8.06    1.93
  13  -2 -10    5.50    2.58
  13  -1  -8   15.57    2.52
  13  -1  -3   66.85    3.26
  15  -9 -10    4.92    1.15
  15  -6 -10    2.88    1.70
  15  -4  -8    4.98    2.10
  15  -4  -5    3.93    1.98
   8   1  -8  294.88    3.92
   9   1  -8   19.74    1.74
   9   2  -5   85.53    2.52
   9   2  -3   52.80    2.02
  11   1  -7    9.98    2.36
  11   1  -3   11.14    1.89
  12  -6 -13    1.99    1.81
  12  -2 -11   36.12    2.48
  12   0  -8    3.96    2.15
  14  -8 -12    1.33    1.29
  14  -7 -12    7.23    1.62
  14  -3 -10   21.55    2.46
  15  -4  -4   26.25    2.34
   9   2  -6  149.53    3.15
  10   1  -8    6.78    1.68
  11   1  -2   10.50    2.19
  12  -5 -13   63.31    2.56
  12  -3 -12    5.06    1.88
  12   0  -2  104.76    3.07
  13  -4 -12    7.27    2.05
  13  -1  -9   29.18    2.65
  13   0  -6   62.20    3.37
  14  -6 -12    3.00    1.61
  14  -3  -2   11.35    1.83
  14  -2  -3   26.91    2.60
  15  -8 -11    1.58    1.21
  15  -7 -11   20.94    1.69
  15  -6 -11    0.97    1.58
  15  -3  -8   14.77    2.55
  15  -3  -7   61.93    2.97
  15  -3  -6    8.90    2.13
  16  -7  -8    6.20    1.33
  16  -7  -7    0.85    1.26
   9   2  -1   77.70    2.27
  10  -2 -12   38.98    2.32
  10   2  -5   43.04    2.17
  10   2  -3   52.46    2.36
  11  -4 -13    5.97    1.81
  11  -1 -11    9.88    1.95
  11   1  -8   11.76    1.99
  12   1  -6    2.42    2.42
  13  -7 -13   11.40    1.55
  13  -6 -13   39.19    2.12
  13  -2 -11   51.46    3.06
  13  -1  -2   31.20    2.32
  13   0  -4   32.14    2.76
  14  -5 -12   -0.37    1.63
  14  -3 -11   15.05    2.54
  14  -1  -7   22.62    2.66
  15  -5 -11    5.34    1.92
  15  -3  -9   36.92    2.77
  15  -3  -5    0.84    1.92
  16  -8  -8    4.99    0.89
  16  -8  -8    1.86    0.56
  16  -6  -8    2.00    1.39
  16  -6  -7    4.31    1.31
  16  -6  -6   13.85    1.66
   8   2  -7  107.81    2.51
   9   1  -9   19.67    1.70
   9   2  -7   61.98    2.28
  10   1  -9   42.19    2.39
  10   2  -6  143.63    3.30
  11  -2 -12   36.02    2.14
  11   0 -10   11.54    1.95
  12   1  -4    0.73    1.94
  13  -5 -13   56.12    2.45
  13   0  -8    4.33    2.23
  15  -4  -3   11.05    1.81
  15  -3  -4   27.20    2.34
  16  -8  -9    1.15    0.94
  16  -5  -8    0.13    1.42
  10   2  -2   20.80    1.69
  11   1  -9   30.51    2.52
  11   1  -1   32.73    1.89
  11   2  -5   -0.51    1.94
  12  -2 -12   58.61    2.70
  12  -1 -11   20.95    2.19
  12   1  -8   11.23    2.48
  12   1  -3   22.56    2.06
  14  -4 -12   21.48    2.06
  14  -2  -2   20.30    2.14
  15  -4 -11   23.66    2.23
  15  -3 -10    9.39    2.02
  15  -2  -8    4.95    2.17
  15  -2  -7    0.49    2.06
  15  -2  -6    8.93    2.06
  16  -7 -10    5.08    1.18
  16  -6 -10    3.07    1.37
  16  -6  -5   -1.01    1.03
  16  -5  -9    6.47    1.52
  11   2  -6   21.02    2.11
  11   2  -4   37.21    2.27
  13  -4 -13    5.01    1.93
  14  -7 -13   10.98    1.33
  14  -6 -13    1.68    1.40
  14  -2 -11   -0.55    2.28
  15  -8 -12    0.47    0.90
  15  -7 -12    1.00    0.85
  15  -6 -12   11.88    1.42
  15  -2  -9    1.36    1.98
  15  -2  -5    0.63    1.85
  16  -8 -10    0.16    0.44
  16  -5  -5   25.68    1.63
  16  -4  -9    4.69    1.74
  16  -4  -6    2.67    1.69
   8   2  -8  137.35    2.68
   9   3  -4   45.82    2.11
  10  -1 -12    5.58    1.77
  10   2  -8   25.68    1.90
  10   2  -1    1.76    1.50
  11   2  -7   17.76    2.05
  11   2  -3   16.77    1.85
  12   1  -9   63.63    3.07
  13  -1 -11   11.10    2.12
  13   0  -2    3.99    1.93
  13   1  -7   21.41    2.83
  13   1  -6   11.49    2.32
  13   1  -5    9.41    2.50
  14  -5 -13    7.55    1.62
  14  -3 -12    4.86    1.67
  15  -5 -12    9.46    1.54
  15  -3 -11   16.00    2.17
  15  -3  -3   41.50    2.18
  15  -2  -4    4.23    1.91
   8   3  -6    1.68    1.33
   9  -1 -12    3.32    1.51
   9   1 -10   34.36    1.82
   9   3  -5  323.22    4.10
   9   3  -3  108.68    2.44
  11  -1 -12    1.47    1.54
  11   2  -2   36.52    2.15
  13   0 -10   57.66    2.82
  13   1  -8   15.61    2.61
  13   1  -4   25.43    2.58
  15  -4 -12    4.21    1.59
  15  -2 -10   21.67    2.20
  15  -1  -8    5.85    2.37
  15  -1  -7   21.89    2.33
  15  -1  -6    5.01    2.13
  16  -7 -11    2.60    0.99
  16  -6 -11    3.56    1.05
  16  -4 -10    3.55    1.42
  16  -4  -5    3.36    1.31
  16  -3  -7   11.65    1.65
  16  -3  -6    6.59    1.77
   8   1 -10   21.01    1.44
   9   3  -6   11.82    1.54
  11  -2 -13    0.40    1.79
  12   2  -5   73.22    2.77
  12   2  -4  117.19    3.28
  14  -4 -13   38.43    1.95
  15  -1  -9   27.56    2.55
  15  -1  -5   19.16    2.24
  16  -5 -11    1.18    1.17
  10   3  -6   11.32    1.65
  10   3  -3   29.78    1.73
  12   2  -8   71.41    3.05
  13   1  -9   24.92    2.37
  15  -3 -12    3.98    1.74
  15  -2  -3   74.06    2.43
  16  -4 -11    2.58    1.26
  16  -3 -10    3.59    1.48
  16  -3  -5   -0.09    1.37
  16  -2  -8   11.62    1.89
   7   1 -10   15.97    1.33
   8   3  -7   14.41    1.38
  10   3  -7   51.20    2.25
  11   3  -5   32.12    2.24
  12   2  -3   16.42    1.87
  15  -7 -13   -0.19    0.76
  15  -1 -10    4.74    1.88
  15  -1  -4   30.72    2.15
  16  -6 -12    2.01    0.91
  16  -2  -7    1.92    1.43
  16  -2  -6    2.76    1.69
  10   0 -12   16.80    1.65
  10   1 -11   29.04    1.88
  10   3  -2   11.35    1.47
  11   0 -12   43.52    2.15
  11   3  -7  149.66    3.54
  11   3  -6   21.97    2.00
  11   3  -4   41.68    2.14
  12   2  -9   16.85    2.12
  13   1 -10    8.37    2.01
  13   2  -6   20.87    2.19
  15  -4 -13    2.25    1.40
  15   0  -8   22.32    2.12
  16  -5 -12    5.67    1.12
  16  -2 -10    8.18    1.69
  17  -5  -9    0.84    0.80
  17  -5  -8    4.65    0.93
  17  -5  -7    1.99    0.87
   8   3  -8   69.96    2.04
   9   2 -10   12.79    1.66
   9   3  -8  126.94    2.79
  10   2 -10   19.20    1.80
  10   3  -8    4.27    1.55
  11  -1 -13    5.33    1.49
  11   2 -10   16.73    1.89
  11   3  -3   50.33    2.08
  12  -1 -13   15.95    1.96
  12   1 -11   23.89    2.16
  12   2  -2  119.28    2.89
  13   1  -2   31.94    1.85
  13   2  -8   25.84    2.31
  13   2  -4   37.50    2.38
  14  -2 -13    0.63    1.62
  15  -2 -12   16.06    1.76
  15  -1 -11   48.38    2.36
  16  -4 -12    2.04    1.04
  16  -3  -4   13.12    1.30
  17  -5 -10    0.15    0.85
  17  -4  -9    1.94    1.06
  17  -4  -8   11.89    1.17
   8   4  -5   66.51    1.92
   8   4  -4   51.72    1.73
   8   4  -3   10.13    1.11
   9   4  -5    6.42    1.53
   9   4  -4  114.25    2.54
  11   3  -8   -0.90    1.68
  12   2 -10   76.46    2.91
  12   3  -7    5.87    2.18
  12   3  -6    8.24    1.87
  12   3  -5   24.96    2.06
  13  -1 -13    8.91    2.02
  13   2  -9   15.29    2.37
  14  -4 -14   16.89    1.46
  15  -1  -3    1.32    1.42
  15   0 -10    7.43    1.84
  16  -1  -9   19.53    1.73
  16  -1  -8    4.36    1.52
  16  -1  -7    2.18    1.46
   8   4  -6   33.68    1.74
   9   3  -9  135.42    2.90
   9   4  -6   12.62    1.44
   9   4  -3    7.82    1.20
  10   3  -9    2.50    1.47
  10   4  -5   53.28    2.24
  11   3  -2   56.22    1.96
  12   3  -8   13.83    2.28
  13   2  -3   43.90    2.29
  15   0  -4    7.73    1.76
  16  -1  -6   -0.60    1.28
  17  -5 -11   -0.20    0.69
  17  -3  -9    0.23    0.96
  17  -3  -8    2.77    1.00
  17  -3  -7    1.60    1.05
   9   4  -2   32.46    1.64
  10   1 -12    4.95    1.68
  10   4  -6   80.17    2.41
  10   4  -4   30.60    1.78
  11   1 -12    2.16    1.47
  11   2 -11    1.23    1.73
  11   3  -9   16.37    1.88
  12  -2 -14    9.16    1.34
  12   1 -12   12.18    2.06
  13   2 -10    3.71    1.79
  14  -3 -14   23.17    1.56
  14  -1 -13    8.72    1.77
  14   0 -12   11.12    1.70
  14   1  -3   11.78    1.75
  15  -2 -13    4.93    1.52
  15  -1 -12    7.80    1.53
  15   1  -8    4.25    1.81
  15   1  -7   25.36    2.05
  15   1  -6    5.89    1.94
  16  -5 -13    1.32    0.74
  16  -1  -5    6.09    1.44
  17  -4 -11    1.27    0.87
  17  -3 -10    0.74    0.94
   8   3  -9  343.37    3.80
   8   4  -7   33.91    1.60
   9   4  -7    4.82    1.38
  10   4  -3    9.17    1.34
  11   4  -6  106.37    2.99
  11   4  -5    2.30    1.78
  12   2 -11   40.89    2.16
  12   3  -9   28.40    2.11
  12   3  -3   10.32    1.66
  13   3  -7   48.16    2.53
  13   3  -6    7.20    1.81
  14   1 -11   21.64    2.09
  15  -4 -14    2.37    0.95
  15   1  -9   30.09    2.11
  15   1  -5   13.39    1.84
  16  -4 -13    1.52    0.86
  16  -2 -12   21.97    1.49
  16  -1 -11   18.11    1.55
  17  -3  -6    7.76    1.03
  17  -2  -9   -0.15    1.06
  17  -2  -8    3.46    1.15
   9   2 -11   12.99    1.38
  10   4  -8    3.28    1.72
  11   3 -10    8.18    1.66
  13   3  -8   39.70    2.34
  13   3  -5  108.04    2.87
  15   1 -10    4.83    1.61
  16   0 -10   28.01    1.91
  16   0  -6    3.10    1.45
  17  -3 -11    1.37    0.86
  17  -2 -10    0.46    1.08
   7   4  -7  127.45    2.34
   9   3 -10    6.81    1.37
   9   4  -8  219.69    3.35
   9   4  -1   50.20    1.54
  10   4  -2  162.63    2.66
  11   4  -3   29.27    1.94
  12   3 -10   35.30    2.10
  12   3  -2    0.94    1.43
  13   2 -11   44.90    2.32
  13   3  -9   39.96    2.30
  13   3  -4   18.83    1.74
  15  -1 -13    9.57    1.37
  15   0 -12   11.25    1.56
  17  -4 -12    1.37    0.71
   8   4  -8   41.77    1.65
  11   2 -12   35.36    2.07
  12   4  -7   29.40    2.07
  12   4  -6    1.58    1.60
  12   4  -5   13.73    1.75
  15   1 -11   51.53    2.12
  15   1  -4   26.50    1.57
  15   2  -8    8.13    1.65
  15   2  -7    2.54    1.51
  16  -2 -13    0.02    1.04
  17  -2  -6    2.05    0.78
  17  -1  -8    2.26    1.11
   8   5  -5   60.74    1.76
   8   5  -4   22.93    1.27
   8   5  -3  128.58    2.27
   9   5  -5   62.65    1.88
  10   4  -9   16.60    1.61
  11   1 -13    4.18    1.28
  11   3 -11   16.74    1.81
  11   4  -9   48.17    2.15
  12   1 -13   19.48    1.67
  12   2 -12   49.30    2.05
  12   4  -8   57.44    2.38
  12   4  -4   67.19    2.24
  13   3 -10   15.31    1.87
  13   3  -3   46.43    2.09
  14  -1 -14    1.67    1.17
  14   2  -3   23.24    1.71
  15  -2 -14    5.58    1.00
  15   2  -9    2.11    1.59
  15   2  -6    8.83    1.55
  16   1  -9   18.32    1.51
  16   1  -7    1.11    1.44
  17  -1  -7    1.79    0.85
   7   4  -8   60.48    1.69
   7   5  -5    5.02    0.91
   9   5  -6   71.04    2.07
   9   5  -3   28.58    1.37
  10   5  -6   21.23    1.59
  10   5  -5   87.69    2.27
  11   4  -2   16.85    1.39
  12   4  -9    2.39    1.66
  15   2 -10   23.91    1.73
  16   1 -10    2.31    1.22
  -6   3   9    6.97    0.41
  -6   3  11   33.33    0.72
  -6   4  12    9.77    0.69
  -6   6  13   26.52    0.85
  -6   7   7   75.83    0.97
  -6   7  13    3.64    0.66
  -6   9  10    1.86    0.66
  -6   9  11   32.63    0.88
  -5  10  13    7.14    0.64
  -4   1  13   43.10    0.87
  -4   2  14   51.27    0.97
  -3   6  16    9.45    0.56
  -3  10  15   11.69    0.51
  -2   4  16   13.33    0.56
  -2   8  16    2.51    0.40
  -1   4  16   85.96    0.97
  -1  12  14    2.18    0.29
  -6   4   8  348.94    1.74
  -6   4  11   12.03    0.68
  -6   6   7    8.32    0.43
  -6   8   8  107.62    1.17
  -6   8  12   11.78    0.73
  -5   2  12   23.82    0.74
  -5   4  14   14.24    0.72
  -5  11   8    2.82    0.50
  -5  11   9   50.77    0.97
  -4   4  15    4.54    0.59
  -4   8  15   18.07    0.71
  -4  10  14    8.63    0.59
  -3   3  15  109.19    1.26
  -3  11  14    0.66    0.42
  -3  12  13    1.50    0.41
  -2   7  16    1.71    0.49
  -1   5  16    6.58    0.51
  -1   8  16    2.03    0.35
   0   5  16   17.62    0.52
  -6   4  10   66.90    0.90
  -6   5   8    9.99    0.46
  -6   6   8   39.80    0.76
  -6   7   8    4.61    0.45
  -6   8   9   22.54    0.71
  -6   8  10   16.04    0.70
  -6   8  11   14.43    0.71
  -5   3  13   97.84    1.16
  -5   5  14    1.29    0.63
  -4   6  15    0.85    0.63
  -4   7  15   47.95    0.93
  -4  12  11    3.22    0.52
  -3   9  15    2.88    0.51
  -2   1  14    1.91    0.53
  -1   6  16   68.73    0.87
  -1   7  16   13.70    0.49
  -1  14  11    1.39    0.28
   0   6  16   28.10    0.55
  -6   5   9  130.62    1.17
  -6   5  10   12.76    0.56
  -6   6   9   61.36    0.93
  -6   6  11    4.16    0.57
  -6   7   9   94.34    1.10
  -6   7  10   31.12    0.77
  -6   7  11   12.39    0.68
  -5   2  11    1.47    0.41
  -5   4  13    1.01    0.69
  -5  10  11    2.93    0.71
  -4   1  12   12.29    0.51
  -4   2  13   70.68    1.03
  -4   9  14    2.69    0.61
  -4  12  10   90.77    1.14
  -3   2  14    9.99    0.67
  -3  13  10   12.56    0.59
  -2  11  14   13.98    0.55
  -2  12  13    5.10    0.47
   0  10  15    0.46    0.22
  -5   2  10   28.52    0.60
  -5   5  13    4.79    0.73
  -5   7  13    3.82    0.76
  -5   8  13   24.20    0.83
  -5   9  12   12.19    0.72
  -5  10   8   16.99    0.75
  -5  10  10   76.26    1.16
  -4  11  12   28.17    0.78
  -3   1  13  238.61    1.57
  -3   7  15    4.46    0.70
  -3   8  15   -0.12    0.54
  -3  10  14    1.86    0.52
  -3  11  13   15.57    0.68
  -3  12  12   10.64    0.56
  -2   9  15    5.85    0.49
   0  14  11   -0.26    0.25
  -5   3  11    6.47    0.54
  -5   6  13    6.24    0.67
  -5  10   9   21.27    0.70
  -4   1  11  139.94    1.14
  -4   8  14   88.06    1.21
  -3   6  15    2.39    0.61
  -2  13  11    2.28    0.49
  -1  11  14    0.42    0.37
  -1  12  13   25.05    0.58
  -1  13  12    0.42    0.29
  -1  13  12    0.16    0.17
   0   3  15    1.54    0.48
   0   9  15    8.78    0.45
   0  11  14   12.45    0.44
   1   9  15    1.37    0.30
   1  11  14    1.06    0.26
   2   8  15    0.47    0.24
  -5   5  12   43.63    0.95
  -5   8  12   18.31    0.78
  -5   9   7   33.18    0.72
  -5   9  11   47.90    0.98
  -4   6  14   35.00    0.94
  -3   9  14    4.61    0.61
  -2   2  14    1.99    0.49
  -2   5  15   20.66    0.80
  -2   7  15    2.36    0.63
  -2  10  14    5.84    0.59
   2   7  15    0.83    0.29
  -5   3   9   20.48    0.51
  -5   4  11    2.21    0.47
  -5   6  12   21.38    0.76
  -5   7  12    5.08    0.65
  -5   8  11   15.05    0.79
  -5   9   8   32.79    0.75
  -5   9   9   45.00    0.95
  -5   9  10    5.08    0.61
  -3   1  12    5.71    0.53
  -3   2  13    1.09    0.55
  -2   1  13  111.04    1.13
  -2   6  15    0.80    0.55
  -2  11  13    5.59    0.59
  -2  12  12    5.19    0.57
  -1   4  15    4.29    0.52
  -1   8  15    5.37    0.49
   0   8  15    0.22    0.41
   0  12  13    0.33    0.30
   1   4  15    0.25    0.39
   1   8  15   12.77    0.43
   1  12  13    1.18    0.29
   1  13  12    0.93    0.27
   2   6  15    6.99    0.38
  -5   4  10   82.05    0.98
  -5   5  11   18.94    0.67
  -5   8   7   57.93    0.83
  -4   2  11    6.28    0.50
  -4   4  13   -0.22    0.54
  -4   8  13    0.51    0.63
  -4  11   8   40.62    0.84
  -4  11   9   34.53    0.80
  -3   4  14   19.14    0.71
  -3   8  14    3.85    0.65
  -3  11  12    3.70    0.57
  -3  12  10   57.18    0.98
  -2   3  14    0.72    0.62
  -2  13  10    4.90    0.50
  -1   5  15   98.10    1.11
  -1   6  15    2.77    0.60
  -1   7  15   18.57    0.63
  -1  10  14    5.71    0.50
  -1  13  11    3.74    0.48
   0   5  15   67.20    0.95
   0   7  15   60.11    0.88
   0  14  10   12.09    0.45
   1   5  15   20.47    0.59
   1   6  15    4.33    0.45
   2  10  14    1.14    0.27
  -5   4   9   74.85    0.86
  -5   5  10    4.89    0.53
  -5   7   7  182.57    1.31
  -5   7  10    9.84    0.65
  -5   8   8  110.55    1.13
  -5   8   9    0.90    0.50
  -4   3  12    3.43    0.48
  -4   6  13   89.11    1.21
  -4   7  13    2.15    0.64
  -4   9  12   38.51    0.95
  -4  10  11   14.75    0.70
  -3   6  14  105.41    1.27
  -2  13   9   68.46    0.97
  -1   1  13   47.34    0.82
   0   6  15   29.36    0.68
   0  10  14    8.55    0.47
   1  10  14    1.22    0.33
   3   9  14    0.82    0.25
  -5   5   8  402.96    1.84
  -5   5   9   17.55    0.53
  -5   6   8  115.76    1.07
  -5   6   9    1.33    0.40
  -5   6  10   43.34    0.80
  -5   7   8   11.89    0.50
  -4   4  12    9.19    0.65
  -4   8  12    5.82    0.78
  -4  10  10   25.02    0.81
  -3   1  11  264.19    1.52
  -3  12   8    6.13    0.62
  -2   4  14  123.64    1.30
  -2   8  14    4.06    0.62
  -2  12  11    0.92    0.60
  -2  13   8    0.53    0.50
  -1   3  14    3.21    0.62
  -1   9  14   15.55    0.68
  -1  11  13   34.81    0.72
  -1  12  12    8.10    0.49
   1  14  10   13.75    0.43
  -4   3  11   17.72    0.56
  -4   5  12   31.98    0.81
  -4   6  12   10.06    0.76
  -4   7  12   19.96    0.78
  -4   9  11   38.53    0.91
  -4  10   7   12.51    0.58
  -4  10   9    2.16    0.54
  -3   2  12   37.43    0.74
  -3   4  13    5.82    0.66
  -2   1  12   19.87    0.62
  -2   5  14   27.39    0.81
  -2  11  12    1.70    0.55
  -1  13  10    7.84    0.56
   0   9  14   65.86    0.94
   0  11  13   23.20    0.60
   0  13  11    4.48    0.43
   2   9  14   19.64    0.47
   2  11  13    6.32    0.37
   3   8  14    3.95    0.33
  -4   8  11   12.43    0.82
  -4   9   6   96.69    1.03
  -4   9  10    1.47    0.66
  -3   5  13   14.30    0.71
  -3   6  13   12.40    0.81
  -3   7  13   58.39    1.05
  -3  11  10   25.27    0.80
  -2  12  10  103.98    1.23
  -1   4  14  328.23    1.96
  -1   8  14   13.30    0.67
   0  12  12   22.41    0.58
   1   9  14    0.93    0.38
   1  11  13   13.28    0.48
   1  13  11    5.63    0.42
   3  12  12    0.46    0.21
  -4   3  10   26.96    0.58
  -4   4  11   24.24    0.64
  -4   5  11  103.13    1.19
  -4   7  11  186.51    1.61
  -4   9   9  123.70    1.31
  -3   3  12   38.58    0.78
  -3  10  11    6.38    0.68
  -3  11   9   29.02    0.86
  -2   3  13   12.66    0.61
  -2   9  13   16.69    0.76
  -1   2  13   17.64    0.62
  -1  10  13    1.14    0.53
  -1  12  11    5.65    0.63
   0   8  14   82.86    1.03
   1   8  14   25.24    0.69
   1  12  12   23.59    0.54
   1  14   9    2.50    0.40
   2   4  14    1.59    0.48
   2   8  14    2.87    0.39
   2  12  12    6.92    0.36
   2  13  11    1.93    0.31
   3   5  14    3.04    0.37
   3   7  14    3.87    0.29
  -4   4  10   42.45    0.76
  -4   6  11    0.51    0.52
  -4   8  10  175.18    1.50
  -4   9   7   44.00    0.77
  -4   9   8    9.83    0.56
  -3   8  12   37.84    1.00
  -3  11   7   42.87    0.87
  -3  11   8    4.37    0.67
  -2   2  12   56.15    0.89
  -2   4  13    6.33    0.72
  -2  10  12   13.01    0.74
  -2  11  11   47.02    0.93
  -1  11  12    7.25    0.59
  -1  13   9   16.00    0.61
   0   7  14    0.99    0.62
   0  10  13    8.07    0.57
   0  13  10    3.29    0.55
   1   4  14   20.26    0.65
   2   5  14    3.14    0.52
   3  10  13    1.21    0.31
   4   9  13    0.87    0.29
  -4   5  10   11.47    0.59
  -4   6  10   22.56    0.71
  -4   7  10   40.78    0.83
  -4   8   6    7.61    0.40
  -4   8   9    6.23    0.62
  -3   4  12  102.97    1.15
  -3   5  12  126.72    1.35
  -3   7  12   23.97    0.89
  -3  10  10    2.73    0.57
  -2   1  11   22.92    0.54
  -2   5  13    2.97    0.69
  -2   7  13   46.66    0.97
  -1   3  13   31.79    0.83
  -1   9  13    7.05    0.63
  -1  13   8   -0.08    0.53
   0   6  14   49.65    0.90
   0  11  12   18.75    0.73
   1   5  14   14.06    0.59
   1   6  14   60.95    0.91
   1   7  14    0.14    0.47
   1  10  13    4.86    0.47
   2   6  14   56.95    0.81
   2  10  13    1.89    0.38
   2  14   9    1.54    0.37
   4  11  12    0.63    0.22
   5   6  13    2.96    0.29
   5   7  13    2.89    0.26
  -4   8   8   79.48    0.97
  -3   6  12    1.37    0.59
  -2  12   7    8.17    0.64
  -2  12   8    8.55    0.59
  -1  12  10   13.84    0.74
   0   9  13   13.44    0.74
   0  12  11    6.16    0.54
   1  13  10   21.38    0.64
   1  14   8   15.25    0.56
   3  14   9    0.79    0.28
  -4   5   9   24.91    0.58
  -4   7   7  359.19    1.76
  -4   7   8  116.33    1.10
  -3   4  11   23.05    0.69
  -3   8  11    3.48    0.62
  -3   9  10   20.50    0.84
  -3  10   9    6.78    0.60
  -2   3  12    4.25    0.51
  -1   4  13   41.93    0.87
  -1  10  12    6.44    0.66
  -1  11  11   18.03    0.73
   0   3  13   95.98    1.15
   0  13   9    8.05    0.61
   1   9  13   42.82    0.87
   1  11  12    6.64    0.51
   1  12  11    2.45    0.51
   2   9  13   13.86    0.59
   2  11  12    4.69    0.49
   3   9  13    5.34    0.40
   3  11  12    0.16    0.33
   4   8  13   12.04    0.41
   4  12  11    0.25    0.25
   4  13  10    6.15    0.34
  -4   6   8  178.82    1.28
  -3   3  10    3.74    0.46
  -3   6  11   12.22    0.72
  -3   7  11   23.02    0.77
  -3  10   6   20.20    0.61
  -3  10   7    6.38    0.60
  -2   2  11   37.95    0.67
  -2   4  12    6.44    0.62
  -2   8  12   22.95    0.82
  -2  11   9    7.42    0.75
  -1   2  12  200.88    1.45
  -1   5  13  129.73    1.34
  -1   6  13    4.63    0.64
   0   8  13    0.50    0.61
   1   3  13   12.92    0.70
   1  14   7    0.58    0.46
   2  12  11    5.63    0.50
   2  13  10    0.27    0.32
   2  13  10    0.01    0.20
   3  12  11    5.48    0.38
   3  13  10    2.47    0.34
   4   5  13   35.82    0.67
   4   7  13   10.77    0.46
   6   8  12    0.18    0.24
  -3   8  10    8.04    0.63
  -3   9   9   35.95    0.83
  -2   5  12   43.28    0.88
  -2   6  12   53.13    0.98
  -2   7  12    1.28    0.62
  -2   9  11   38.95    0.93
  -2  10  10   25.55    0.90
  -1   1  11   64.89    0.80
   0   4  13    3.08    0.56
   0  10  12   42.38    0.90
   0  11  11    7.39    0.71
   0  12  10   24.70    0.72
   0  13   8    2.23    0.61
   1   8  13   48.47    0.90
   2   8  13    4.03    0.58
   2  14   8    8.60    0.46
   3   4  13    8.09    0.54
   3   8  13   38.77    0.68
   4   6  13    0.26    0.37
   5   9  12    1.29    0.32
  -3   4  10   20.75    0.56
  -3   9   8   14.27    0.69
  -2   3  11  266.85    1.66
  -2  11   8    2.47    0.53
  -1   3  12   34.98    0.76
  -1   8  12  119.60    1.43
  -1  12   8    8.31    0.69
   0   2  12   46.86    0.79
   0   5  13  101.22    1.21
   1   4  13    1.28    0.53
   1   7  13   47.50    0.98
   1  10  12   66.08    0.98
   2  10  12   31.78    0.77
   3   5  13   55.98    0.89
   3   6  13    5.15    0.55
   3   7  13   35.22    0.72
   3  10  12   10.83    0.55
   3  14   8   42.95    0.69
   5  11  11    5.19    0.27
   6   7  12    0.55    0.25
   6  10  11    0.79    0.26
  -3   5  10    8.49    0.50
  -3   8   9    2.75    0.49
  -3   9   6   14.85    0.50
  -3   9   7   32.52    0.70
  -2   2  10  165.50    1.19
  -2   8  11   30.21    0.87
  -2  11   6    0.84    0.52
  -2  11   7   41.23    0.82
  -1   4  12   12.34    0.74
   0   9  12    6.81    0.70
   1  11  11  109.37    1.25
   1  12  10    7.39    0.63
   2   5  13   34.30    0.79
   2   6  13   89.35    1.14
   2   7  13   30.72    0.74
   2  13   9   33.09    0.75
   2  14   7    5.00    0.49
   5  12  10    1.21    0.30
   5  13   9    1.35    0.29
  -3   8   8   12.82    0.62
  -2   4  11    1.12    0.44
  -2   5  11   12.11    0.66
  -2   7  11    2.74    0.60
  -1   1  10   15.11    0.47
  -1   2  11   11.43    0.49
  -1   5  12   17.38    0.70
  -1   6  12   49.14    0.97
  -1   7  12   21.17    0.80
  -1   9  11   41.08    1.02
  -1  11   9   86.07    1.22
  -1  12   7    7.54    0.59
   0   1  11  199.94    1.33
   0   3  12    3.42    0.61
   0  12   9    4.21    0.61
   1   2  12  210.12    1.48
   1   9  12    1.31    0.69
   2  11  11   46.78    0.89
   3  11  11   61.12    0.87
   3  13   9    5.06    0.49
   4   9  12   22.65    0.57
   4  11  11    2.37    0.38
   4  13   9    2.94    0.40
   5   8  12    2.06    0.36
   7   8  11    0.58    0.24
  -3   6   9  109.16    1.08
  -3   8   6   18.21    0.54
  -3   8   7   94.49    0.99
  -2   3  10  104.05    1.03
  -2   6  11    2.40    0.55
  -2  10   8   18.35    0.75
  -1  10  10   15.96    0.76
  -1  12   6    5.47    0.51
   1  13   8    1.27    0.50
   2   9  12   26.47    0.76
   2  12  10   34.63    0.74
   2  14   6   29.33    0.70
   3   9  12   25.04    0.67
   3  12  10    2.08    0.50
   4  12  10   11.85    0.46
   5   7  12    6.09    0.46
  -3   6   8   34.74    0.69
  -3   7   8  187.66    1.36
  -2   8  10    3.87    0.59
  -2   9   9   20.41    0.72
  -2  10   7    5.32    0.63
  -1   3  11   70.10    0.92
  -1   8  11    7.01    0.69
   0   4  12    4.80    0.57
   0   5  12  114.54    1.33
   0   6  12  230.91    1.83
   0   7  12    7.70    0.69
   1   3  12    0.63    0.49
   1  10  11   29.37    0.92
   4   8  12   11.42    0.53
   4  14   7    2.21    0.42
   5   6  12   56.63    0.82
   5  10  11   12.49    0.44
   5  14   7    4.50    0.35
   6   9  11    1.81    0.31
   7  10  10    0.89    0.25
  -3   7   7   59.93    0.78
  -2  10   5   26.29    0.60
  -2  10   6   19.66    0.59
  -1   4  11    4.44    0.62
  -1   7  11   14.04    0.81
  -1  11   8    1.05    0.56
   0   9  11   10.96    0.73
   1   4  12    7.27    0.68
   1  11  10    1.24    0.62
   1  12   9    3.84    0.58
   1  13   7   45.05    0.86
   2   3  12   24.23    0.68
   2   8  12   34.75    0.86
   2  10  11   24.50    0.83
   2  13   8    2.53    0.50
   3   3  12    2.53    0.48
   3   8  12   32.63    0.77
   4   4  12   25.94    0.72
   4   7  12    4.76    0.59
   4  10  11    8.12    0.57
   6  12   9   14.21    0.44
   6  13   8    1.60    0.29
   7   6  11    0.60    0.29
  -2   5  10   71.70    0.94
  -2   6  10   19.48    0.66
  -2   8   9   -0.04    0.49
  -1   2  10   44.31    0.68
  -1   5  11    5.90    0.55
  -1   6  11    1.13    0.56
  -1   9  10   19.51    0.78
  -1  10   9    0.29    0.57
  -1  11   7   18.63    0.76
   0   1  10   27.70    0.58
   0  10  10  172.94    1.61
   0  11   9   22.92    0.77
   0  12   7    3.59    0.65
   1   5  12    5.92    0.63
   1   6  12   83.48    1.17
   2   4  12   27.69    0.84
   2  12   9    6.67    0.66
   3   7  12   19.64    0.76
   3  10  11    5.14    0.55
   3  13   8    4.03    0.57
   4   6  12   71.09    0.99
   5  11  10    0.10    0.36
   5  13   8    0.56    0.40
   6   8  11    2.06    0.41
   8   8  10    0.61    0.19
  -2   7   9   61.88    0.96
  -2   9   7  307.36    1.83
  -1   8  10    3.50    0.71
   1   2  11    4.25    0.54
   2   5  12   47.06    0.93
   2  11  10   22.93    0.77
   3   6  12    6.85    0.62
   3  11  10   12.89    0.70
   3  12   9    0.47    0.56
   4  11  10    1.88    0.46
   4  13   8    1.92    0.44
   4  14   6    5.90    0.48
   5   9  11    1.64    0.42
   5  12   9    4.57    0.40
   8  10   9    1.28    0.25
  -2   5   9   44.65    0.77
  -2   6   9   39.38    0.74
  -2   8   8   27.94    0.70
  -2   9   5   29.20    0.63
  -2   9   6   14.53    0.57
  -1  10   8    5.10    0.61
  -1  11   5   29.15    0.67
   0   4  11    0.43    0.61
   0   7  11  199.65    1.69
   0  12   6    8.65    0.60
   2   9  11   24.69    0.83
   2  13   7   16.77    0.66
   3   9  11   25.30    0.82
   3  14   5   16.03    0.64
   4   9  11   14.16    0.62
   5  14   6    4.12    0.42
   6   7  11    9.38    0.47
   6  10  10    6.39    0.40
   7   9  10   -0.01    0.29
   7  12   8    1.87    0.30
   7  13   7    1.55    0.28
   8   7  10   13.19    0.38
  -1   7  10    9.59    0.64
   0   5  11   63.33    0.99
   0   6  11   84.85    1.15
   0   9  10   72.32    1.15
   0  10   9    8.41    0.69
   0  11   8   14.76    0.72
   0  12   5    7.47    0.56
   1   8  11    6.14    0.69
   2   2  11   69.24    0.91
   5   8  11    1.29    0.44
   6   6  11   27.74    0.63
   8   6  10    5.42    0.35
  -2   7   8   12.74    0.52
  -2   8   7   16.87    0.55
  -1   5  10   43.62    0.79
  -1   6  10    4.10    0.53
  -1   8   9   28.45    0.86
  -1  10   7   22.54    0.70
   0   2  10  448.67    1.96
   1   1  10    5.45    0.38
   1   7  11  170.71    1.59
   1  12   7   10.56    0.76
   2  10  10  101.11    1.29
   2  11   9   18.08    0.88
   2  12   8   65.39    1.04
   2  13   6   10.79    0.70
   3   8  11   45.76    1.00
   3  13   7   37.30    0.80
   4   8  11   30.87    0.79
   4  14   5    8.92    0.55
   5   7  11   23.54    0.76
   5  10  10   29.72    0.70
   6  11   9    1.72    0.39
   6  13   7    9.00    0.43
   7   8  10   28.42    0.62
   7  14   5    6.70    0.33
   8  11   8    1.77    0.27
  -2   5   8   33.07    0.60
  -2   6   8   45.23    0.71
  -2   7   7   57.72    0.83
  -2   8   6   15.18    0.48
  -1   9   8   84.23    1.09
  -1  10   6   24.49    0.74
   0   8  10    8.86    0.69
   0  11   7    7.57    0.62
   1   4  11    6.28    0.56
   1   5  11   27.27    0.77
   1   6  11    7.92    0.67
   1   9  10   -0.03    0.64
   2   7  11    5.04    0.76
   3   3  11  132.85    1.29
   3  10  10   34.78    0.88
   3  12   8   11.49    0.72
   4   3  11   28.77    0.76
   4   7  11   51.04    0.99
   4  10  10   90.14    1.12
   4  13   7   28.52    0.70
   5   5  11   54.07    0.92
   5   6  11    2.97    0.58
   5  11   9   46.05    0.86
   5  13   7   11.43    0.54
   5  14   5    7.33    0.51
   6   9  10    0.99    0.40
   6  12   8   18.87    0.53
   6  14   5    0.65    0.36
   7  10   9    1.89    0.38
   8   9   9    1.05    0.34
   8  12   7    1.38    0.26
   9   7   9   10.25    0.34
  -1   3   9   54.62    0.73
  -1   7   9    5.16    0.53
  -1  10   5   45.38    0.79
   0   3  10    2.76    0.41
   0   9   9    7.08    0.66
   0  10   8    3.56    0.59
   1  10   9    5.45    0.69
   1  11   8    7.12    0.65
   1  12   6   12.64    0.73
   2   4  11   21.46    0.72
   2   5  11   18.73    0.82
   2   6  11    8.14    0.67
   3  11   9   13.96    0.72
   3  13   6    0.86    0.60
   4   4  11   26.91    0.80
   4  11   9    1.70    0.56
   4  12   8   21.88    0.72
   5  12   8    4.82    0.49
   7   7  10   -0.10    0.43
   9   6   9    1.14    0.29
   9  11   7    1.80    0.27
  -1   5   9  101.98    1.04
  -1   6   9   79.59    0.99
  -1   8   8  170.11    1.42
  -1   9   7   45.25    0.83
   0   4  10   62.97    0.90
   0   5  10   12.87    0.59
   0   6  10   42.30    0.86
   0  11   6   17.89    0.67
   1   2  10   59.19    0.81
   1   8  10  376.43    2.28
   3   4  11    9.93    0.60
   3   5  11   25.74    0.78
   3   6  11    8.41    0.68
   4   9  10    0.58    0.69
   5   9  10   10.18    0.61
   6   8  10   18.79    0.67
   7   4  10    4.37    0.50
   7   6  10   21.16    0.64
   7  11   8    1.85    0.44
  10   7   8   -0.23    0.23
   0   8   9  121.65    1.33
   0  10   7   81.63    1.15
   0  11   5   32.44    0.75
   1   7  10  251.52    1.91
   1  11   7   21.28    0.85
   1  12   5    1.55    0.50
   2  10   9   14.76    0.78
   2  11   8   32.55    0.92
   4  13   6    9.73    0.68
   5  14   4    8.10    0.53
   6  10   9    4.59    0.50
   6  14   4   20.42    0.58
   7   5  10   21.67    0.59
   7  12   7    3.22    0.39
   7  14   4   25.56    0.50
   8   8   9    2.25    0.37
   8  10   8    8.01    0.45
  -1   7   8   45.55    0.78
  -1   8   7   14.07    0.63
  -1   9   6    1.69    0.41
   0   9   8    1.96    0.57
   1   4  10   23.53    0.75
   1   6  10   27.48    0.89
   1   9   9  110.46    1.35
   1  10   8   28.92    0.86
   2   2  10    2.92    0.42
   2   8  10  229.01    1.84
   2  12   6   72.03    1.15
   3   8  10    2.83    0.77
   3  12   7    4.26    0.60
   4  10   9    8.32    0.78
   5   8  10   30.96    0.79
   5  10   9   25.45    0.76
   5  13   6   11.60    0.60
   6   7  10   11.96    0.63
   6  11   8   46.76    0.85
   8  13   5   15.35    0.48
   8  14   3    0.17    0.28
  10   6   8    2.96    0.30
  -1   5   8   29.50    0.63
  -1   9   5   30.42    0.61
   0   3   9  144.90    1.14
   0   7   9    2.19    0.54
   0  10   6  283.26    1.84
   1   5  10    6.12    0.56
   2   3  10   89.15    1.07
   2   7  10   18.01    0.79
   3   2  10    7.83    0.48
   4   2  10   71.99    0.98
   4  11   8   27.80    0.91
   4  12   7    8.61    0.64
   5   7  10   23.19    0.84
   5  11   8    6.99    0.70
   5  12   7    7.32    0.66
   6   4  10   25.28    0.76
   6   5  10   22.28    0.74
   6   6  10   17.17    0.66
   6  12   7    1.44    0.46
   8  11   7   25.45    0.60
  10   9   7    4.25    0.29
  -1   7   7   46.82    0.78
  -1   8   6  301.34    1.69
   0   5   9   59.48    0.86
   0   6   9   32.03    0.74
   0   8   8    4.66    0.55
   1   8   9  183.06    1.62
   1  11   6   69.10    1.05
   2   4  10   73.48    1.09
   2   6  10   18.22    0.75
   2   9   9  293.69    2.07
   2  10   8  181.53    1.73
   2  11   7   78.01    1.22
   3   7  10  111.95    1.35
   4  13   5   78.07    1.06
   5   3  10    4.22    0.59
   6   9   9   56.53    0.92
   7  13   5   43.43    0.77
   7  14   3    0.30    0.38
   8   4   9    2.09    0.46
   8   6   9    3.89    0.50
   8  12   6    3.78    0.39
   9   8   8    5.37    0.38
   9  13   4    4.38    0.32
   0   9   7    5.36    0.56
   0  10   5    1.72    0.54
   1   2   9   18.88    0.50
   1   9   8    2.38    0.61
   1  10   7   11.44    0.66
   2   5  10   40.62    0.86
   2  12   5   16.55    0.70
   3   3  10   48.09    0.85
   3   6  10   16.17    0.77
   3   9   9   86.62    1.25
   4   3  10   57.27    0.91
   4   6  10    7.85    0.76
   5   4  10   59.80    0.96
   5   9   9   85.62    1.18
   5  13   5    1.75    0.62
   6  13   5   24.67    0.73
   8   5   9   13.84    0.52
   8   9   8   16.99    0.55
  -1   6   7   85.24    0.88
   0   7   8   28.23    0.70
   0  10   4    3.48    0.48
   1   3   9    7.86    0.48
   1   7   9    7.00    0.62
   1  11   5   42.66    0.85
   2   8   9   46.94    0.99
   2  12   4   19.26    0.75
   3   5  10   81.91    1.13
   3  10   8   39.36    0.97
   3  11   7  216.67    1.78
   4   5  10   21.71    0.76
   4  12   6   84.37    1.23
   4  13   4   14.07    0.73
   6   8   9   42.57    0.96
   6  10   8   42.46    0.88
   7   7   9   38.49    0.85
   7  11   7   27.81    0.69
   7  12   6    7.96    0.52
   9   7   8    5.65    0.46
   9  11   6    1.38    0.34
   9  12   5    2.99    0.34
  10   8   7    0.45    0.33
  10  10   6    5.84    0.34
   0   6   8   41.00    0.78
   0   8   7    5.29    0.48
   0   9   6  134.65    1.24
   1   4   9   39.53    0.78
   1   5   9   35.47    0.79
   1   6   9   12.27    0.61
   1  11   4   53.03    0.92
   2   2   9   76.39    0.91
   2   9   8   44.01    1.04
   3   8   9    4.67    0.69
   5  10   8   13.33    0.75
   5  12   6   41.12    0.89
   6  11   7    3.44    0.58
   6  12   6   48.61    0.89
   7   6   9    3.88    0.61
   8  13   4    0.74    0.31
   8  13   4    0.53    0.21
   9   6   8   61.36    0.84
  10  11   5   14.51    0.46
  10  12   4    8.19    0.36
  11  10   5    1.96    0.25
   0   4   8  232.54    1.40
   0   5   8  164.54    1.24
   1   8   8  113.34    1.27
   1  10   6   33.45    0.81
   2   7   9    9.30    0.68
   3  12   5   39.40    0.90
   4   8   9    7.70    0.71
   5  11   7   47.41    0.97
   5  13   4    9.09    0.60
   6   7   9    4.04    0.70
   6  13   4   47.38    0.91
   7   5   9    3.33    0.59
   7  13   4    8.10    0.57
   8  10   7   12.98    0.55
   8  12   5    0.80    0.47
   9   4   8    1.97    0.43
   9   5   8   32.14    0.68
   9   9   7    5.75    0.42
   9  13   3   19.45    0.52
  11   8   6    9.62    0.38
  11  11   4    0.96    0.24
   0   7   7  199.44    1.42
   0   9   5   50.54    0.78
   1   7   8    1.10    0.59
   2   3   9  172.40    1.32
   2   6   9    4.32    0.57
   3   2   9   25.78    0.65
   3   7   9   27.61    0.85
   3   9   8   81.82    1.22
   3  11   6    0.19    0.67
   4   7   9   11.61    0.82
   5   2   9   35.68    0.77
   6   9   8    5.96    0.74
   8  11   6   13.21    0.57
   0   9   4   13.78    0.49
   1  10   5    4.64    0.50
   2   5   9   93.28    1.11
   2   8   8    5.30    0.63
   2  11   5    6.27    0.63
   3   6   9    3.18    0.70
   3  10   7   21.44    0.83
   4   2   9   92.34    1.01
   4   9   8   45.04    1.01
   5  13   3    4.04    0.63
   6   3   9   92.81    1.09
   6   4   9   19.02    0.77
   7   8   8   32.08    0.88
   7  10   7    4.43    0.58
   7  12   5    2.03    0.53
   8   7   8    9.79    0.55
   8  13   3    7.30    0.53
   9  10   6    9.15    0.50
   9  12   4   42.37    0.74
  10   6   7    2.71    0.41
  10   9   6    1.68    0.37
  11   7   6    1.01    0.32
   0   6   7   17.37    0.51
   1   6   8   77.69    0.98
   1   8   7   20.56    0.66
   1   9   6    2.33    0.58
   2   9   7  130.56    1.38
   2  10   6  139.30    1.41
   3   3   9   16.22    0.59
   3   4   9   74.73    1.02
   3   5   9    4.69    0.55
   4   3   9  121.56    1.25
   4   6   9    9.05    0.68
   4  10   7   -0.40    0.64
   4  11   6   12.36    0.72
   5   3   9   61.90    0.95
   5   4   9    6.89    0.66
   5   5   9   41.11    0.99
   5  12   5    8.72    0.69
   6  10   7    5.72    0.67
   6  12   5    0.15    0.54
   6  13   3   13.62    0.70
   7  11   6   19.50    0.71
   7  13   3   10.52    0.64
   8   6   8   20.27    0.73
   8   9   7   23.32    0.70
   9  11   5    3.55    0.44
  10   4   7    5.29    0.45
  10   5   7   39.16    0.71
  11   9   5   12.51    0.46
  12   7   5   13.25    0.40
   0   7   6   27.56    0.59
   0   8   5   10.81    0.44
   1   4   8  290.29    1.60
   1   5   8  108.49    1.07
   1  10   4   23.21    0.63
   2   7   8    3.44    0.58
   2  11   4   19.94    0.67
   3   8   8   34.46    0.90
   3  11   5  113.59    1.36
   3  12   3   52.10    0.92
   4   4   9    4.36    0.55
   4   5   9   28.19    0.80
   4   8   8   35.50    1.01
   4  12   4  118.18    1.39
   6  11   6   73.68    1.13
   7   7   8   38.86    0.95
   8   4   8   23.25    0.72
   8   5   8   10.25    0.66
  10  10   5    4.06    0.48
  10  12   3    0.59    0.36
  11  12   2   10.58    0.40
  12   9   4    0.20    0.28
   1   7   7   61.15    0.89
   1  10   3   59.03    0.83
   2   2   8   43.91    0.65
   2   6   8   15.60    0.68
   2  11   3   18.66    0.68
   3   1   8    4.45    0.40
   3   9   7    4.61    0.65
   3  10   6   18.67    0.84
   5   8   8   78.37    1.20
   7   9   7   16.43    0.75
   8  10   6   23.09    0.72
   8  11   5    5.85    0.65
   8  12   4   27.76    0.70
   9   7   7   19.60    0.62
  10   8   6   17.00    0.58
  10  11   4    3.01    0.41
  10  13   1    2.52    0.34
  11   5   6    0.24    0.34
   1   8   6  301.31    1.77
   1   9   5  116.26    1.14
   2   3   8   22.75    0.59
   2   5   8   10.49    0.60
   2   8   7   13.54    0.64
   3   7   8    3.71    0.61
   4   9   7   72.17    1.23
   4  11   5    6.05    0.77
   6  12   4    8.43    0.79
   6  13   2    6.28    0.64
   7  12   4    1.69    0.54
   7  13   2   10.93    0.67
   8   8   7   18.51    0.71
   8  13   2   10.59    0.54
   9   9   6    6.47    0.54
  11   4   6    2.90    0.39
  11  11   3    2.31    0.34
  12   6   5    0.48    0.26
  12  10   3    1.60    0.29
  12  11   2    8.49    0.31
  12  11   2    3.21    0.19
  13   6   4    5.52    0.31
   1   6   7   24.93    0.60
   2   4   8  135.02    1.17
   2   9   6    2.07    0.51
   3   2   8  135.11    1.14
   3   6   8   49.26    0.91
   3  11   4   12.88    0.73
   4   7   8  230.21    1.81
   4  10   6    5.44    0.68
   4  12   3    2.15    0.59
   5   7   8   62.36    1.11
   5   9   7    3.21    0.68
   5  11   5    3.26    0.76
   6   6   8    6.54    0.72
   7   3   8   58.42    0.93
   7   4   8    7.41    0.68
   7  10   6    1.78    0.62
   7  11   5   21.62    0.79
   9   6   7   -0.44    0.47
   9  10   5    0.04    0.58
   9  12   3    9.00    0.51
   9  13   1   18.60    0.62
  11   8   5    8.72    0.44
  11  13  -1   14.96    0.42
  12   5   5    4.67    0.35
   1   5   7   93.08    0.93
   1   9   4   22.63    0.63
   2   7   7   16.29    0.63
   2  10   4  110.10    1.19
   3   3   8    8.41    0.52
   3   5   8  113.86    1.20
   3   8   7   39.84    0.90
   4   2   8    8.16    0.52
   4   6   8   62.14    1.04
   5   2   8   83.44    1.01
   5   6   8    7.70    0.66
   5  10   6   11.43    0.74
   6   2   8   74.21    0.96
   6   5   8    6.20    0.72
   6  13   1   38.33    0.85
   7   8   7    1.45    0.62
   8   7   7    9.67    0.66
   8   9   6    4.56    0.70
   9   3   7   25.81    0.70
   9   4   7   38.91    0.84
   9   5   7    4.20    0.52
   9  11   4    2.46    0.50
  10   7   6   26.59    0.67
  10   9   5   19.95    0.63
  10  12   2    7.38    0.52
  10  13   0    7.89    0.44
  12   8   4    6.62    0.39
  12  12   0    2.74    0.30
  13   8   3    5.35    0.33
   1   7   6   69.18    0.86
   1   8   5   63.38    0.86
   3   4   8   53.24    0.84
   3   9   6   32.44    0.84
   3  10   5    0.81    0.57
   3  11   3  189.97    1.56
   4   3   8   31.70    0.78
   4   5   8   96.75    1.16
   4   8   7  140.04    1.48
   4  11   4   13.72    0.78
   4  12   2  127.68    1.30
   5   3   8    6.27    0.61
   5   5   8    8.72    0.73
   5   8   7  106.65    1.40
   5  12   3    3.71    0.61
   6   3   8    7.32    0.59
   6   4   8  280.02    1.88
   6   8   7   18.35    0.80
   7  12   3   49.81    1.03
   7  13   1    3.39    0.51
   8  12   3   24.13    0.74
  11  12   1    2.67    0.35
   1   9   3  116.48    1.06
   2   6   7   25.09    0.64
   2   8   6   64.07    0.94
   2   9   5  226.78    1.61
   3   7   7   47.25    0.91
   4   4   8   77.33    1.02
   4   9   6   86.01    1.27
   5   4   8    8.86    0.60
   8   6   7    4.86    0.58
   8  10   5   34.78    0.88
   8  11   4    1.05    0.58
   9  13   0    8.99    0.54
  10   6   6    2.20    0.48
  10  11   3   37.59    0.75
  10  13  -1    5.05    0.43
  11   7   5    1.96    0.42
  13   9   2   -0.02    0.30
   1   6   6   32.89    0.61
   2   5   7  104.85    1.04
   2  10   3    0.61    0.42
   3  11   2   13.02    0.64
   4   7   7   21.76    0.87
   4  10   5   27.25    0.85
   5   9   6   82.87    1.24
   5  11   4    7.83    0.68
   5  12   2   13.92    0.78
   6   7   7  132.72    1.52
   7  11   4  137.61    1.48
   7  13   0    8.96    0.57
   8   3   7   22.49    0.75
   8   8   6    2.78    0.75
   8  13   0    3.28    0.55
   9   9   5   11.39    0.74
   9  12   2   13.29    0.61
  10   3   6   63.71    0.92
  10   4   6   84.09    1.05
  10   5   6    1.91    0.47
  10   8   5    0.78    0.56
  11  11   2    0.55    0.39
  12  10   2    2.74    0.41
  13   7   3    2.00    0.35
  13  10   1    6.92    0.36
   1   7   5   19.63    0.52
   1   8   4  188.85    1.29
   2   7   6    0.88    0.42
   3   6   7   72.23    1.00
   3   8   6    8.08    0.59
   3  10   4   58.86    0.96
   4  11   3    6.63    0.70
   5   7   7   85.30    1.22
   5  10   5   17.06    0.83
   6  10   5  195.31    1.75
   7   6   7   32.25    0.87
   8   4   7    1.87    0.54
   8  12   2   45.86    0.98
   9  10   4    2.13    0.67
   9  11   3   16.81    0.77
   9  13  -1    2.62    0.50
  10  12   1    0.60    0.46
  11   6   5    9.74    0.51
  11  12   0   24.46    0.62
  12  12  -1    3.45    0.34
   2   8   5    8.74    0.51
   2   9   4    2.22    0.42
   2  10   2    7.58    0.44
   3   5   7   94.40    1.09
   3   9   5    5.67    0.55
   4   1   7   22.09    0.55
   4   6   7   73.21    1.10
   4   8   6   18.49    0.82
   5  12   1    1.15    0.64
   6   6   7   38.03    0.92
   7   2   7   27.68    0.75
   7   5   7    3.96    0.71
   7   8   6   34.72    0.94
   7  12   2   82.56    1.18
   8   9   5    7.19    0.81
   9   6   6    3.21    0.65
  10   9   4   11.47    0.70
  11   5   5   14.39    0.61
  12   6   4    1.88    0.44
  14   6   2    0.91    0.30
  14   8   1    9.33    0.38
   2   6   6  319.21    1.75
   3   4   7    0.92    0.39
   4   9   5    4.03    0.70
   4  10   4   35.22    0.88
   5   6   7   11.05    0.68
   5   8   6    6.67    0.69
   5  11   3   10.16    0.71
   6   8   6    3.77    0.68
   7   3   7   69.39    1.01
   7   4   7   12.94    0.69
   8  10   4    7.55    0.77
   8  11   3   20.36    0.80
   9   8   5   16.10    0.84
   9  12   1    2.51    0.63
  10   7   5    7.79    0.60
  10  10   3    1.05    0.63
  10  11   2    7.46    0.57
  11   3   5   68.93    0.94
  11   4   5    8.52    0.56
  13   6   3    0.54    0.33
  13   8   2    6.96    0.45
  14   9   0    0.61    0.30
   2   9   3   64.42    0.87
   3   7   6   82.05    1.04
   3  10   3   18.55    0.64
   4   2   7    7.07    0.41
   4   4   7   19.67    0.67
   4   5   7   83.54    1.05
   4  11   2   52.52    0.93
   5   2   7   34.48    0.71
   5   5   7   46.26    0.89
   5   9   5   79.57    1.28
   5  10   4    4.39    0.76
   6   3   7    5.49    0.61
   6   4   7   34.24    0.89
   6   5   7    7.69    0.62
   6  11   3    2.92    0.64
   6  12   1    0.75    0.59
   7   9   5    6.49    0.72
   8  12   1   10.02    0.77
  10  12   0   36.73    0.81
  11  11   1   12.90    0.57
  12   5   4    3.11    0.40
  12  11   0    5.71    0.42
  12  12  -2    1.13    0.35
  13   5   3    1.50    0.38
  14   5   2    2.16    0.32
   2   5   6    8.08    0.41
   2   7   5  117.86    1.09
   3   8   5    1.44    0.46
   3   9   4   23.17    0.69
   4   3   7  133.85    1.16
   4   7   6   48.48    0.92
   5   3   7   10.29    0.55
   5   4   7  103.78    1.17
   6   9   5   21.73    0.84
   6  10   4  116.67    1.42
   7   7   6    8.38    0.71
   8   6   6   24.60    0.82
   9   9   4   29.97    0.96
   9  11   2    1.18    0.69
  10   6   5    0.23    0.52
  11   7   4    1.04    0.51
  11  10   2   28.10    0.72
  11  12  -1    3.06    0.43
  12   3   4    2.72    0.44
  12   4   4   19.57    0.57
  14   4   2    2.30    0.33
   2   8   4   46.95    0.74
   3   6   6   41.14    0.76
   3  10   2    5.35    0.52
   4  10   3   25.73    0.84
   4  11   1    9.18    0.57
   5   7   6   29.04    0.83
   5  11   2   16.20    0.70
   6   7   6    5.30    0.67
   6  12   0    4.89    0.65
   8   5   6    2.86    0.71
   9  10   3    0.33    0.64
   9  12   0    5.56    0.66
  12   7   3   22.93    0.69
  12  12  -3    3.74    0.38
  13   4   3    1.73    0.29
   2   9   2   46.43    0.69
   4   6   6   44.85    0.89
   4   8   5   45.60    0.89
   4   9   4   42.72    0.87
   6  11   2    0.28    0.59
   7   6   6  271.74    2.00
   7   8   5    5.63    0.71
   7  11   2   57.81    1.18
   8   2   6   39.61    0.85
   8  11   2   31.80    0.92
   8  12   0    6.51    0.70
  10   5   5   74.13    1.08
  10   9   3    1.59    0.71
  10  11   1   84.83    1.14
  10  12  -1    3.12    0.62
  11   6   4   35.27    0.84
  11  12  -2   12.07    0.57
  13   7   2   12.91    0.52
  13  11  -2    1.10    0.28
  15   6   0    2.09    0.32
   3   5   6   41.13    0.71
   3   7   5  440.23    2.13
   3   9   3   42.99    0.80
   3  10   1   41.68    0.76
   5   6   6    7.10    0.59
   5   8   5   44.31    0.95
   5   9   4    0.48    0.67
   5  10   3   87.37    1.21
   5  11   1   13.24    0.75
   6   6   6  256.10    1.89
   6   8   5   26.83    0.86
   7   5   6   34.02    0.94
   7   9   4   13.34    0.87
   7  10   3  161.07    1.70
   8   3   6   20.61    0.70
   8   7   5   60.86    1.18
  10  10   2   43.06    0.93
  11   8   3    5.52    0.59
  11  11   0   12.11    0.58
  12  11  -1    7.42    0.49
  12  12  -4    1.71    0.36
   3   4   6  138.03    1.12
   3   8   4  121.52    1.18
   4   5   6    4.54    0.46
   4  10   2   68.47    1.05
   6   5   6    0.90    0.64
   6   9   4   53.13    1.06
   6  10   3    3.65    0.64
   7   4   6   41.43    0.96
   8  12  -1    6.43    0.69
   9  11   1   55.74    1.05
   9  12  -1   14.66    0.70
  10   7   4   18.97    0.77
  11   5   4    0.57    0.50
  11   9   2    3.63    0.60
  11  10   1   19.72    0.73
  12   6   3    2.82    0.46
  12   8   2   68.07    0.99
  13   6   2    2.58    0.50
  13   8   1    2.32    0.45
  13  10  -1    2.85    0.42
  14   6   1    1.42    0.38
  14   9  -1    3.44    0.36
   4   4   6   53.81    0.85
   4   7   5   90.28    1.10
   5   1   6   82.67    0.88
   6  11   1    4.27    0.63
   7   3   6  190.22    1.54
   7   7   5   13.78    0.78
   7  11   1    7.00    0.82
   9   5   5   34.48    0.88
   9  10   2   80.94    1.26
  10  11   0    8.15    0.71
  10  12  -2   31.06    0.76
  11   4   4   30.72    0.82
  11  12  -3    0.61    0.43
  12   9   1   15.07    0.65
  12  10   0   16.45    0.63
  13  11  -3    3.08    0.39
  15   5   0    2.62    0.34
  15   7  -1    1.10    0.35
   3   6   5   16.15    0.53
   3   9   2    0.99    0.45
   4   3   6    1.60    0.34
   4   8   4   90.74    1.11
   4   9   3   69.50    1.00
   5   2   6   68.19    0.87
   5   4   6  407.17    2.11
   5   7   5   26.28    0.78
   5  10   2   67.96    1.11
   6   2   6  109.04    1.14
   6   3   6    0.60    0.51
   6   4   6   12.27    0.62
   6   7   5   11.03    0.71
   8   6   5   14.95    0.76
   8   8   4   25.30    0.89
   9   4   5    1.07    0.68
   9  12  -2   30.19    0.84
  11   3   4    5.06    0.53
  11   7   3   44.74    0.94
  11  11  -1   14.86    0.75
  11  12  -4    8.55    0.53
  12   5   3    8.08    0.54
  12  11  -2   14.46    0.65
  13   5   2    1.13    0.50
  14   5   1    1.56    0.43
  14  10  -3    0.61    0.38
  15   4   0    1.32    0.36
   3   7   4   59.08    0.87
   4   6   5   29.31    0.75
   4  10   1    2.94    0.48
   5   3   6   11.25    0.49
   6   8   4   46.89    1.06
   6  10   2   95.46    1.34
   7   6   5   21.99    0.89
   7   8   4   33.00    0.94
   7  10   2   17.96    0.92
   8   9   3  116.77    1.46
   8  10   2   24.43    0.92
   9   2   5    9.70    0.59
   9   3   5    4.24    0.57
   9   7   4   21.33    0.84
   9  11   0    5.96    0.80
  10   9   2   25.06    0.89
  10  10   1    7.96    0.73
  10  12  -3    9.22    0.63
  12   4   3    6.85    0.53
  12   7   2    2.74    0.55
  13   7   1    6.55    0.59
  13  11  -4    1.35    0.40
  14   7   0    9.29    0.49
  15   3   0    8.70    0.43
   3   8   3   13.29    0.50
   5   6   5   44.00    0.86
   6   6   5    8.30    0.63
   6   9   3    9.83    0.70
   6  11   0    1.73    0.59
   7   9   3   79.47    1.24
   7  11   0   64.65    1.17
   8   5   5   77.50    1.16
   8  11   0   58.57    1.18
   9  12  -3   22.78    0.78
  11   6   3    3.12    0.70
  11   8   2    4.58    0.66
  11  10   0   32.68    0.88
  12   2   3    4.83    0.48
  13   4   2    1.47    0.41
  13  10  -2    8.91    0.51
  14   4   1    0.46    0.38
  15   6  -1   14.58    0.54
  16   5  -2    1.89    0.33
   3   9   1   39.70    0.68
   4   7   4   10.60    0.61
   4  10   0   37.23    0.78
   5  10   1   24.54    0.81
   7   5   5  158.29    1.56
   8   4   5    4.41    0.60
   8   7   4   17.04    0.82
   9   6   4   22.44    0.85
   9   8   3    1.35    0.69
  10   4   4    6.56    0.74
  10  11  -1    4.90    0.66
  11  11  -2   28.75    0.88
  12   8   1    1.60    0.59
  12   9   0    1.89    0.67
  12  11  -3   13.50    0.60
  13   3   2    1.34    0.40
  13   9  -1   25.62    0.72
  13  11  -5    3.13    0.42
  14   3   1    1.34    0.39
  14  10  -4    0.34    0.39
  15   9  -4    1.44    0.35
   4   5   5  258.04    1.61
   4   8   3    1.84    0.46
   5   5   5   11.65    0.63
   5   7   4    3.85    0.61
   6   5   5   39.19    0.84
   6  11  -1    1.92    0.55
   7   7   4   10.48    0.73
   8   2   5   18.53    0.67
   8   3   5   99.63    1.20
   8   8   3    0.76    0.78
   8  10   1   43.08    1.12
  10   2   4   20.82    0.76
  10   3   4   22.21    0.82
  12   6   2   13.52    0.68
  13   6   1    3.46    0.60
  14   6   0    2.13    0.46
  15   7  -2    6.16    0.48
  16   4  -2    3.47    0.38
   3   8   2   10.62    0.46
   5   8   3    9.41    0.66
   6   7   4   21.21    0.76
   6  10   1   22.91    0.78
   7   1   5   47.48    0.80
   7   4   5    7.24    0.61
   7  10   1   29.68    0.91
   7  11  -1    6.34    0.67
   8   6   4    7.02    0.79
   8   9   2   26.59    0.93
   8  11  -1   17.94    0.87
   9   5   4    2.38    0.65
  10  10   0    9.86    0.78
  11   7   2   15.96    0.82
  12  11  -4    0.56    0.54
  13  10  -3    3.41    0.56
  13  11  -6   15.07    0.53
  15   5  -1    3.05    0.48
  15   8  -3    9.28    0.46
  16   6  -3    8.29    0.45
   4   6   4  139.31    1.25
   5   4   5    1.59    0.42
   5  10   0   22.67    0.74
   6   4   5   24.02    0.71
   6   8   3    3.92    0.61
   6   9   2   10.00    0.67
   7   2   5   57.24    0.89
   7   3   5   40.16    0.82
   7   8   3   53.42    1.08
   7   9   2    3.33    0.68
  10   6   3   56.32    1.10
  10  11  -2    2.81    0.65
  11   8   1   20.11    0.96
  11  10  -1    8.39    0.72
  11  11  -3    4.17    0.59
  12   5   2    0.48    0.53
  12   7   1   11.68    0.74
  12  10  -2    3.17    0.58
  13   5   1    4.22    0.61
  13   7   0    3.06    0.66
  14   5   0    1.47    0.55
  14   7  -1    5.54    0.54
  14   9  -3    2.85    0.46
  14  10  -5    1.70    0.43
  16   3  -2    0.55    0.36
   4   9   1   11.00    0.53
   5   3   5   28.11    0.62
   5   6   4  151.32    1.40
   6   1   5    2.17    0.38
   6   2   5   49.75    0.83
   6   3   5  278.24    1.75
   6   6   4   12.82    0.72
   7   6   4    9.77    0.68
   7  11  -2   44.79    1.01
   8   5   4   21.45    0.88
   9   4   4   13.79    0.72
   9   8   2    9.74    0.90
   9  10   0   41.74    1.06
  11   2   3    8.13    0.69
  11   9   0   21.52    0.90
  12   4   2    5.01    0.65
  12   8   0   59.40    1.19
  12  11  -5    1.69    0.54
  13   8  -1   10.25    0.76
  13   9  -2    7.37    0.63
  14   8  -2    6.77    0.56
  15   4  -1    6.01    0.52
   4   7   3   72.71    0.94
   4   8   2   67.08    0.91
   6  10   0   60.82    1.03
   7  10   0   12.42    0.81
   8   7   3    2.50    0.67
   8  10   0  119.05    1.50
   8  11  -2    3.99    0.67
   9   1   4   17.48    0.65
   9   2   4  120.54    1.36
   9   3   4   14.67    0.69
   9   9   1   15.06    0.88
  10   5   3   49.43    1.04
  10   7   2    8.58    0.77
  10  11  -3   14.16    0.81
  11  11  -4   20.23    0.84
  13   4   1    2.85    0.62
  13  10  -4    4.00    0.62
  14   4   0    1.26    0.55
  14  10  -6    2.41    0.42
  16   8  -6    1.12    0.32
   4   9   0   56.64    0.85
   5   7   3   79.83    1.05
   5   9   1   49.24    0.89
   6   7   3   65.11    1.10
   7   5   4    0.21    0.53
   7   7   3   28.61    0.87
   8   8   2   31.03    0.97
   8   9   1   10.31    0.79
   9   6   3   64.11    1.18
  11  10  -2   27.18    0.98
  12   3   2   18.10    0.69
  12   6   1   14.39    0.79
  12  10  -3    5.16    0.70
  12  11  -6    6.39    0.57
  14   6  -1    1.99    0.64
  14   9  -4    3.87    0.57
  15   2  -1    4.69    0.52
  15   7  -3    5.16    0.51
  15   8  -4   14.33    0.55
  15   9  -6    3.11    0.43
   5   5   4   13.58    0.55
   5   8   2   48.41    0.88
   6   5   4   99.10    1.17
   6   8   2   73.87    1.11
   6   9   1   25.80    0.80
   6  10  -1   33.41    0.89
   7   8   2   74.50    1.20
   7   9   1   98.37    1.33
   8   3   4  230.12    1.80
   8  11  -3   45.68    0.95
   9  10  -1   68.31    1.23
  10   4   3    1.38    0.62
  10  11  -4    3.48    0.75
  11  11  -5    4.21    0.66
  13   3   1    2.43    0.49
  13   6   0   37.06    0.93
  14   2   0    5.00    0.57
  14   3   0   17.97    0.64
  14  10  -7    2.93    0.38
  16   4  -3    1.95    0.46
  16   6  -4    6.59    0.46
   7   4   4  174.93    1.55
   7  10  -1    0.49    0.71
   8   1   4   52.66    0.91
   8   2   4    6.98    0.56
   8   6   3   41.57    1.00
   8  10  -1   26.31    0.91
   9   5   3    4.08    0.67
   9   7   2   14.70    0.84
  10   3   3   21.13    0.78
  10   6   2    7.18    0.76
  11  11  -6    1.28    0.59
  12   9  -2    2.20    0.70
  13   7  -1    0.72    0.75
  13   9  -3    6.27    0.67
  13  10  -5   20.46    0.72
  14   7  -2    6.36    0.64
  14   8  -3    2.71    0.55
  14  10  -8    7.19    0.45
  15   5  -2    2.08    0.49
  15   9  -7   12.00    0.52
  16   8  -7   -0.24    0.32
   4   7   2    5.24    0.51
   4   8   1  144.61    1.24
   5   4   4  126.79    1.18
   5   9   0    0.54    0.44
   6   4   4  132.80    1.29
   7   3   4   93.97    1.18
   7   6   3    5.21    0.61
   9   8   1   46.50    1.12
   9   9   0   62.27    1.23
  10   1   3   10.32    0.62
  10   2   3   21.91    0.78
  10  11  -5   47.45    1.02
  11   4   2    7.16    0.69
  11  10  -3    5.93    0.86
  12   8  -1   18.43    0.90
  12  10  -4    5.66    0.68
  13   5   0   32.18    0.91
  13   8  -2    5.85    0.69
  14   5  -1   14.49    0.70
  15   8  -5    0.23    0.45
  16   3  -3    4.54    0.51
  17   4  -5    0.26    0.29
  17   4  -5    0.41    0.18
   5   6   3   17.77    0.60
   6   6   3   28.84    0.77
   6   9   0   11.67    0.74
   6  10  -2  359.14    2.20
   7   2   4  219.38    1.62
   7   9   0   12.56    0.84
   8   5   3   22.92    0.82
   8   7   2    5.93    0.71
   8   8   1    2.44    0.84
   8   9   0    2.05    0.67
   9   4   3    9.48    0.72
   9  10  -2   51.78    1.20
  10   7   1    4.84    0.78
  10   9  -1   41.72    1.20
  11   3   2    9.98    0.80
  11   6   1    0.23    0.74
  13  10  -6    2.05    0.53
  15   4  -2    4.65    0.58
  15   6  -3   20.27    0.71
  15   7  -4    1.69    0.52
  15   9  -8    1.66    0.39
  16   1  -3    5.52    0.51
  16   2  -3    0.10    0.47
  16   5  -4   30.69    0.76
  16   7  -6    0.52    0.42
  17   5  -6    9.94    0.46
   5   7   2   27.44    0.70
   5   8   1   45.83    0.84
   6   2   4   81.09    0.97
   6   8   1    7.33    0.69
   7   7   2   14.32    0.73
   7   8   1    5.52    0.74
   7  10  -2   27.02    0.88
   8  10  -2    3.95    0.71
   9   3   3  333.32    2.26
   9   6   2    5.99    0.74
  10   5   2   49.57    1.10
  10   8   0   14.19    0.90
  11   1   2    7.94    0.68
  13   4   0   15.57    0.83
  13   6  -1    3.03    0.83
  13   9  -4    6.29    0.71
  13  10  -7    1.70    0.57
  14   4  -1    1.38    0.58
  14   6  -2    3.13    0.68
  14   8  -4    2.62    0.69
  15   9  -9    1.83    0.33
  16   6  -5    1.74    0.45
  17   3  -5   22.44    0.59
   5   9  -1   44.45    0.85
   7   5   3   65.46    1.06
   8   4   3   19.28    0.87
   9   2   3  265.54    1.98
   9   9  -1  206.36    2.05
  11   7   0    1.06    0.76
  11  10  -4    9.33    0.78
  12   9  -3    4.91    0.77
  13   8  -3    6.81    0.88
  13  10  -8   25.44    0.74
  14   9  -6   22.41    0.75
  15   3  -2    9.14    0.62
  15   8  -6    2.09    0.50
  17   2  -5    3.12    0.44
   5   5   3   65.90    0.90
   6   5   3    9.49    0.55
   7  10  -3    2.28    0.67
   8   6   2   40.57    1.00
   9   1   3   11.72    0.59
   9   7   1  119.99    1.57
   9   8   0   13.51    0.88
   9  10  -3    7.20    0.78
  10   4   2   25.80    0.88
  10   6   1    7.72    0.93
  11   5   1   11.22    0.81
  12   8  -2   77.29    1.38
  12  10  -6    3.88    0.74
  13   3   0    1.58    0.56
  13   7  -2    5.10    0.78
  14   3  -1    3.20    0.57
  15   1  -2   -0.08    0.55
  15   2  -2    4.74    0.57
  15   5  -3    1.54    0.60
  16   7  -7    3.64    0.49
  17   4  -6    4.53    0.48
  17   6  -8    0.32    0.27
   6   9  -1    6.68    0.59
   7   6   2  188.65    1.74
   7   9  -1   52.22    1.06
   8   3   3  194.87    1.68
   8   7   1  215.65    2.00
   8   9  -1   37.19    1.03
   8  10  -3  115.82    1.48
   9   5   2   50.56    1.10
  10   3   2   67.63    1.24
  10   9  -2   12.80    0.88
  11  10  -5    0.73    0.79
  13   2   0    8.68    0.63
  13   5  -1    5.53    0.88
  13   9  -5   21.02    0.83
  14   2  -1    6.65    0.60
  14   5  -2   31.23    0.97
  14   8  -5    0.30    0.74
  14   9  -7   10.78    0.67
  15   6  -4   12.34    0.71
  15   7  -5   12.98    0.70
  15   8  -7    0.71    0.56
   5   6   2    3.64    0.43
   5   7   1   29.35    0.74
   5   8   0  127.24    1.25
   5   9  -2   10.95    0.57
   6   4   3   97.29    1.13
   6   6   2  164.09    1.50
   7   8   0   29.77    0.94
   8   2   3   18.57    0.77
   8   8   0   56.25    1.15
   9  10  -4   36.11    1.13
  10   7   0    6.63    0.83
  10   8  -1   58.08    1.29
  11   4   1   27.54    0.94
  11   6   0   17.93    0.94
  12   9  -4    8.42    0.82
  12  10  -7    1.35    0.59
  14   6  -3   17.14    0.97
  14   9  -8    8.46    0.63
  15   4  -3   17.41    0.86
   6   7   1    5.05    0.54
   6   8   0   95.18    1.21
   7   3   3   62.36    0.97
   7   7   1   19.99    0.76
   8   5   2   47.32    1.01
   9   4   2    3.84    0.64
   9   6   1   34.60    1.03
  10   2   2  161.61    1.64
  10   5   1    8.66    0.79
  11   7  -1   23.32    1.04
  11   8  -2   23.16    1.04
  12   4   0   29.01    1.05
  12  10  -8   25.07    0.78
  13   6  -2   85.04    1.47
  13   8  -4    1.66    0.78
  13   9  -6   14.57    0.91
  14   4  -2   18.17    0.95
  14   7  -4   10.88    0.81
  14   9 -10    3.59    0.47
  14   9  -9    2.00    0.54
  15   8  -8   10.10    0.66
  16   2  -4   16.10    0.75
  16   7  -8    5.71    0.43
   6   3   3    4.52    0.52
   6   9  -2    1.96    0.51
   7   2   3   20.44    0.68
   7   9  -2   89.74    1.37
   8   9  -2   10.36    0.79
   9   7   0    4.99    0.79
   9   8  -1   15.49    0.91
   9  10  -5   91.67    1.45
  10   9  -3   26.40    1.01
  11  10  -7    7.88    0.83
  13   7  -3   89.38    1.50
  14   8  -6    8.05    0.82
  15   3  -3   62.46    1.23
  15   5  -4    9.21    0.75
  15   7  -6    3.52    0.63
  16   0  -4   73.22    1.16
  16   1  -4    4.98    0.59
  16   4  -5    7.90    0.70
  16   7  -9    9.22    0.57
  17   4  -7    1.25    0.51
   5   8  -1   68.27    0.99
   6   5   2   37.11    0.84
   7   5   2   23.14    0.76
   8   4   2   42.66    1.00
   8   6   1    2.83    0.66
   9   3   2   16.68    0.78
  10   6   0   50.39    1.30
  11   5   0    1.61    0.77
  12   3   0    0.37    0.67
  13   9  -7   11.64    0.86
  14   3  -2    8.39    0.88
  15   6  -5    4.35    0.73
  15   8 -11    2.00    0.39
  15   8  -9   12.03    0.61
  16   5  -6    4.63    0.68
  16   6  -7    3.78    0.59
  17   0  -6   18.76    0.69
  17   1  -6    0.68    0.50
   6   8  -1    0.54    0.55
   6   9  -3   64.58    1.07
   7   8  -1    4.22    0.74
   8   7   0    5.91    0.71
   8   8  -1   46.59    1.08
   9   2   2   47.27    1.05
   9   5   1   50.21    1.13
  10   4   1    2.17    0.69
  10   7  -1   42.17    1.21
  10   8  -2   68.36    1.39
  12   5  -1   31.54    1.11
  15   1  -3    3.77    0.75
  15   8 -10    5.02    0.47
  16   7 -11    5.14    0.42
  16   7 -10    6.00    0.41
  17   5  -9    0.89    0.45
   6   6   1   10.51    0.58
   7   6   1    3.62    0.58
   7   7   0    0.75    0.56
   8   9  -3   16.95    0.85
  10   9  -4    6.02    0.85
  11   6  -1   16.72    0.99
  11   8  -3    1.17    0.85
  12   9  -6    3.31    0.76
  13   9  -8    0.73    0.65
  14   2  -2   19.59    0.85
  14   8  -7    2.46    0.71
  15   4  -4   27.15    0.99
  16   3  -5    1.15    0.65
   9   1  -2   77.15    2.16
   9   2  -4   11.98    1.56
  10   1 -12    4.20    1.84
  10   2  -7   42.70    2.17
  11  -1  -2    7.16    1.92
  11   1  -5    5.26    1.74
  12   1  -9   64.92    3.16
  13   0 -10   57.42    3.30
  13   0  -8    2.80    2.56
  14  -6  -4   14.13    2.04
  15  -7 -14    2.48    0.94
  15  -3 -11   15.08    2.30
  15  -3 -10   11.67    2.10
  15  -3  -9   38.43    2.81
  10   1  -3   44.05    2.01
  11  -2  -1    9.93    1.88
  12   1  -8    8.33    2.19
  13  -2  -4   36.01    2.40
  13  -1 -13    7.68    1.82
  14  -5  -4    4.27    1.97
  15  -8  -6    0.39    1.25
  15  -6 -14    9.49    1.13
  15  -6  -6   24.24    2.15
  15  -4 -13    2.46    1.36
  15  -4  -7   22.90    2.16
  15  -3 -12    6.46    2.00
  15  -3  -8    9.85    2.46
   8   3  -7   16.70    1.45
   9   2 -11    9.79    1.86
  10   2  -5   40.64    2.06
  11   1  -4  122.57    3.20
  11   2  -9   63.08    2.89
  11   2  -8    9.53    2.23
  12  -1  -3   17.63    2.05
  12   1 -11   24.13    2.50
  13  -3  -3   52.37    2.48
  14  -4 -15   -0.23    1.31
  15  -5 -14    3.09    1.15
  15  -5  -6    1.69    1.68
  16  -7 -10    6.82    1.22
  16  -6 -10    6.19    1.42
   8   3  -8   68.48    2.11
   9   2  -3   48.95    1.90
   9   3  -7    4.44    1.67
  11   2  -7   16.42    2.03
  12  -2  -2  126.63    3.01
  12   1  -6    3.48    1.99
  13   0  -6   61.55    2.97
  14  -4  -4   88.01    2.83
  14  -1 -12    5.87    1.96
  14  -1  -7   24.06    2.57
  15  -4 -14    2.58    1.39
  15  -4  -6   30.73    2.42
  15  -3 -13   12.03    1.66
  15  -3  -7   57.94    2.94
  15  -2 -11    2.54    1.90
  15  -2 -10   23.26    2.34
  16  -7 -12    1.98    0.81
  16  -7  -9    6.25    1.12
  16  -6 -12    3.01    1.04
  16  -5 -11    1.33    1.28
  16  -5 -10    4.03    1.39
   8   3  -9  318.46    4.01
   9   3  -8  148.13    3.04
   9   3  -6   10.30    1.47
  10   2  -4  180.37    3.28
  12   1 -12   10.79    2.31
  12   1  -5    3.70    2.23
  13  -2 -15    6.80    1.52
  13   1  -9   23.66    2.80
  14  -2 -14    1.78    1.48
  14  -1 -13    9.93    2.11
  15  -2  -8    9.50    2.16
  16  -5 -12    3.37    1.25
  16  -5  -9    4.89    1.37
  16  -4 -11    2.20    1.60
   9   0   0  100.76    2.12
   9   1  -1   41.50    1.66
   9   3  -9  117.62    2.84
   9   3  -5  281.88    3.87
  10   1  -2   47.94    1.92
  10   3  -8    4.45    1.86
  11  -1  -1   27.04    2.06
  11   1 -13    5.24    1.87
  12   2  -9   18.86    2.60
  12   2  -8   75.45    3.26
  13  -2  -3   45.16    2.32
  13   1  -8   18.41    2.43
  14  -3  -4   30.92    2.24
  14   0  -8   21.44    2.52
  15  -6  -5    2.78    1.63
  15  -3  -6    9.33    2.31
  16  -6 -13    0.98    0.66
  16  -4 -12    2.69    1.46
  16  -4  -9    7.16    1.80
   8   3 -10   10.86    1.55
   9   3 -10    7.61    1.79
  10   3  -7   54.34    2.30
  10   3  -6   10.52    1.70
  11   1  -3   11.07    1.78
  12   0 -14    6.99    1.52
  12   2 -10   83.12    3.01
  12   2  -7   10.73    2.15
  14   0 -12   11.65    2.26
  15  -5 -15   15.88    1.06
  15  -2 -13    3.69    1.52
  15  -2  -7    2.78    2.02
  15  -1 -11   54.21    2.64
  15  -1 -10    4.94    1.95
  15  -1  -9   31.50    2.51
  16  -3 -11    0.72    1.65
   9   3  -4   37.64    1.79
  11   2 -12   34.00    2.38
  12   1 -13   18.58    1.91
  12   1  -4    0.33    1.72
  12   2 -11   48.16    2.88
  12   2  -6   48.22    2.97
  13   1  -6   11.56    2.21
  14  -1 -14    0.07    1.65
  15  -4 -15    4.28    1.05
  15  -4  -5    2.75    1.66
  15  -1 -12    6.06    1.99
  15  -1  -8    4.65    2.15
  16  -4 -13    1.37    1.06
  16  -4  -8    0.77    1.52
  16  -3 -12    6.56    1.38
  16  -3  -9    2.10    1.61
  10   3  -5    7.50    1.62
  11   2  -4   34.19    2.10
  11   3  -9   19.85    2.05
  11   3  -8    1.36    1.85
  11   3  -7  146.32    3.48
  13  -1 -15    5.00    1.54
  13  -1  -3   53.10    2.62
  13   0 -14   32.77    2.21
  13   0  -4   32.48    2.33
  14  -2 -15   12.04    1.32
  15  -2 -14    8.07    1.53
  15  -2  -6   11.79    2.08
  16  -5  -7    4.48    1.30
  16  -3  -8    8.40    1.78
   8   4  -7   31.99    1.85
   8   4  -6   38.80    1.92
   9   3  -3  100.19    2.52
  10   1  -1   26.40    1.90
  11   1  -2    9.02    1.91
  11   3 -10    7.63    1.94
  11   3  -6   22.73    2.11
  12   2 -12   49.65    2.68
  12   2  -5   76.59    3.08
  13   1  -5    9.60    2.38
  13   2 -10    3.01    2.53
  13   2  -9   19.25    2.38
  13   2  -8   22.29    2.46
  14  -3  -3   77.30    2.61
  15  -3  -5    2.00    1.65
  15  -1 -13    8.86    1.51
  15  -1  -7   24.00    2.38
  15   0 -10   10.36    2.36
  16  -4 -14    3.23    0.99
  16  -4  -7    1.32    1.43
  16  -3 -13    6.48    1.22
  16  -2 -12   23.82    1.86
  16  -2 -11    1.12    1.46
  16  -2 -10   10.68    1.78
  16  -2  -9    2.64    1.75
   8   4  -8   42.07    1.82
   8   4  -5   67.44    1.98
   9   1   0    3.25    1.29
   9   4  -8  218.59    3.71
   9   4  -6   11.37    1.72
  10   2  -2   19.96    1.61
  10   3  -4   14.54    1.66
  12   0  -2   92.80    2.96
  12   1  -3   15.93    2.22
  13  -2  -2  101.30    2.62
  13   2 -11   46.48    2.83
  13   2  -7   15.59    2.28
  14   1 -12    5.39    2.07
  15   0  -8   25.00    2.67
  16  -3  -7   21.66    2.05
   9   4  -5    3.60    1.55
  11   2 -13    0.14    1.43
  11   3  -5   30.02    2.13
  12   1 -14    0.42    1.35
  12   3  -7    3.48    2.00
  14   0 -14    2.76    1.64
  15  -2  -5   -0.22    1.94
  15  -1 -14   16.06    1.64
  15  -1  -6    6.25    1.88
  15   0 -12   10.19    1.77
  16  -5  -6    2.03    1.25
  16  -3 -14    1.93    1.06
  16  -2 -13    1.24    1.16
  16  -2  -8    9.10    1.76
  16  -1 -10    2.68    1.85
  17  -5 -11    0.24    0.73
  17  -5 -10    0.09    0.90
   8   4  -9   44.07    1.83
   8   4  -4   42.71    1.70
  10   3  -3   24.49    1.96
  10   4  -9   14.59    2.19
  10   4  -8    0.89    1.53
  10   4  -7   19.56    1.87
  10   4  -6   77.70    2.71
  12   3  -6    8.68    2.49
  16  -4  -6    2.50    1.47
  16  -1 -11   16.75    1.73
  16  -1  -9   18.44    1.89
  17  -4 -11    1.57    0.95
  17  -4 -10    0.32    1.08
   9   4  -4   94.83    2.42
  10   3 -12   40.81    1.99
  11   3 -12    4.97    1.94
  11   3  -4   39.90    2.16
  12   3 -11   24.11    2.15
  13   1 -14    0.98    1.38
  14   1 -13    8.79    1.69
  15  -3  -4   21.39    1.83
  15   1 -11   47.75    2.63
  15   1 -10    4.53    1.94
  15   1  -9   27.58    2.62
  16  -3  -6    7.51    1.66
  16  -2 -14    3.24    1.10
  16  -2  -7    3.36    1.63
  16  -1  -8    5.94    1.89
  17  -5  -9    0.85    0.70
  17  -5  -9    0.30    0.45
  17  -4  -9    1.13    1.06
  17  -3 -11    2.64    1.09
   8   4  -3    7.80    1.15
  10   2  -1    2.98    1.54
  10   4  -5   63.42    2.38
  11   1  -1   26.40    1.91
  11   2  -2   32.54    2.21
  11   4  -8   40.95    2.41
  12   1  -2    4.82    1.77
  13   2 -13    7.33    1.83
  13   2  -5    9.36    2.05
  13   3 -10   16.37    2.18
  13   3  -9   43.16    2.64
  13   3  -8   46.44    2.67
  15  -1  -5   18.98    1.92
  15   0  -6   16.45    2.26
  15   1 -12    8.00    1.94
  15   1  -8    6.66    2.05
  16  -1 -13    8.84    1.27
  17  -3 -12    1.05    0.88
  17  -3 -10    0.66    1.03
  10   1   0    7.74    1.24
  10   4  -4   25.08    2.01
  11   4 -10   87.79    2.81
  11   4  -6  111.63    3.08
  12   2  -3   15.79    1.90
  12   3 -12    3.95    1.59
  13   3  -7   48.92    2.70
  14  -1  -3   10.97    1.86
  15  -2  -4    6.66    1.76
  15  -1 -15    0.36    0.99
  15   0 -14    2.95    1.32
  16  -2  -6    2.15    1.64
  16  -1  -7    3.60    1.71
  16   0 -10   28.95    2.02
  17  -4  -8    9.81    1.20
  17  -3 -13    0.88    0.78
   8   5  -6   16.75    1.62
   9   2   0    7.87    1.12
   9   3  -1  697.44    5.25
   9   4 -11    2.25    1.51
   9   4  -3    8.10    1.35
  10   3  -2   10.77    1.53
  10   4 -11   34.92    2.13
  11   4  -5    2.78    1.71
  12   4  -9    5.08    2.06
  12   4  -7   30.58    2.62
  13   0  -2    3.19    1.86
  14   1 -14   -0.24    1.34
  15   1 -13    9.95    1.68
  15   1  -7   28.59    2.29
  16  -1 -14   -0.67    1.00
  16   0 -12   29.50    1.76
  17  -2 -12    4.57    1.00
  17  -2 -10    1.82    1.12
   7   5  -7   56.42    1.89
   8   4  -2   16.43    1.31
   8   5  -8   44.46    2.00
   8   5  -7  228.21    3.36
   8   5  -5   57.22    1.91
   9   5  -8    3.42    1.66
   9   5  -7    6.30    1.47
   9   5  -6   76.88    2.29
  11   4 -11   16.54    1.78
  12   3  -4    7.39    1.92
  14   2 -13    0.49    1.65
  15   2 -10   26.06    2.14
  16  -3  -5   -0.47    1.28
  17  -3  -8    2.07    0.85
  17  -2 -13   -0.51    0.84
  17  -2  -9   -0.25    1.04
   8   2   1    6.45    1.04
   8   5  -4   19.58    1.64
   9   5  -9  123.30    2.92
   9   5  -5   63.38    2.14
  10   4  -3    8.19    1.48
  10   5  -8   35.79    2.06
  10   5  -7   28.98    1.96
  10   5  -6   20.61    2.13
  12   4 -11    6.53    2.15
  12   4  -6    3.70    1.92
  13   2 -14    1.26    1.41
  13   3  -5  100.96    3.26
  14   3 -11   16.07    2.20
  15  -1  -4   34.49    1.88
  15   1  -6    6.23    1.82
  15   2 -11    0.96    1.62
  15   2  -8    7.47    1.95
  16  -1  -6   -0.05    1.35
  16   1 -11   15.29    1.78
  16   1 -10    3.12    1.68
  17  -2  -8    1.55    1.23
  17  -1 -10    0.77    1.26
   8   3   0    0.66    0.91
   9   4  -2   31.34    1.65
  10   5  -5   90.18    2.80
  11   2  -1   12.98    1.52
  11   3  -2   50.81    2.29
  11   4 -12    8.19    1.81
  11   5  -8    6.63    2.11
  12   1  -1   62.79    2.28
  12   2  -2  120.26    2.77
  12   4  -5   12.49    2.24
  13   4  -9   17.95    2.12
  15   1 -14   15.14    1.49
  15   2  -7    2.30    2.08
  16   1 -12    6.54    1.43
  16   1  -9   22.07    1.90
  17  -3  -7    2.09    1.02
  17  -1  -9    1.42    1.13
   8   4  -1   53.26    1.78
   8   5  -3  121.21    2.54
  10   5 -10   35.22    2.23
  11   5  -7    8.56    1.86
  11   5  -6    5.22    2.09
  12   3  -3   12.86    1.84
  13   1  -2   31.54    2.12
  13   3 -13    6.64    1.52
  15   1  -5   16.39    2.05
  16   0 -14   11.89    1.10
  16   1  -8    6.16    1.57
  17  -1 -13    3.88    0.96
   9   3   0   11.71    1.42
  10   4  -2  171.18    3.04
  10   5  -4   68.58    2.48
  11   4  -3   27.12    1.87
  11   5 -10    0.72    1.61
  12   5  -8    8.18    2.24
  13   3  -4   19.34    1.92
  13   4  -6    6.55    1.94
  15   0  -4    6.11    1.50
  15   2  -6    9.58    2.06
  15   3 -10   11.56    2.06
  16   0  -6    2.18    1.40
  17  -2  -7    0.02    1.00
  17  -1  -8    1.68    1.10
  17   0 -10   36.57    1.66
   7   5  -2   38.96    1.52
   9   4  -1   48.78    1.88
   9   5  -3   28.85    1.66
  11   5  -5    7.44    1.82
  12   4  -4   63.19    2.50
  12   5 -10    1.25    1.97
  12   5  -9    5.48    1.85
  12   5  -7    3.48    1.86
  14   1  -3   10.08    1.57
  14   3 -13    1.87    1.54
  14   4 -10   22.97    2.34
  14   4  -9   18.31    2.12
  15   3 -11   15.42    1.73
  15   3  -9   38.04    2.23
  15   3  -8   10.34    2.12
  16  -1  -5    7.77    1.31
  16   1  -7    1.88    1.42
  16   2 -11    0.96    1.42
  16   2 -10    6.35    1.50
  16   2  -9    0.58    1.64
  17   0 -12   12.13    1.10
   8   5  -2    1.55    1.04
   8   6  -6   36.21    1.91
  12   3  -2    0.07    1.68
  12   5  -6    5.61    1.85
  13   3 -14   11.60    1.45
  13   4  -5   22.94    2.05
  14   4 -11    0.41    1.79
  16   2 -12   22.33    1.57
  16   2  -8    9.74    1.76
  17  -1  -7    1.39    1.06
  17   0  -8    0.88    1.22
   7   6  -6  261.53    3.30
   7   6  -5   62.71    1.97
   8   3   1    7.84    1.07
   8   4   0   48.58    1.63
   8   6  -7   12.37    1.38
   8   6  -5   48.10    1.77
   9   5  -2    7.11    1.47
   9   6  -8   25.78    1.75
   9   6  -5    8.90    1.65
  10   5  -3   93.03    2.50
  10   6  -8   78.49    2.71
  10   6  -7    3.25    1.58
  10   6  -6    6.02    1.87
  11   2   0   74.87    2.21
  11   3  -1    7.76    1.39
  11   4  -2   17.42    1.99
  12   4  -3   93.86    2.79
  12   5  -5    4.49    2.09
  13   3  -3   46.19    2.38
  13   5  -8   17.81    2.05
  15   1  -4   29.94    1.87
  15   2 -14    3.79    1.05
  15   2  -5    0.14    1.76
  15   3  -7   67.54    2.55
  16   1 -14    0.35    0.79
  16   1  -6    0.20    1.55
  17   1 -11   -0.06    1.04
  17   1 -10    2.20    1.16
   7   6  -7   90.20    2.05
   7   6  -4    2.76    0.99
   8   6  -8   99.28    2.37
   8   6  -4   35.04    1.60
   9   6  -9   23.17    1.93
  10   3   0   -1.14    1.17
  10   4  -1    7.92    1.36
  10   6  -9   24.95    2.06
  10   6  -5   21.14    2.08
  11   6  -7   54.39    2.66
  13   4 -13    7.52    1.60
  14   2  -3   27.68    1.94
  17  -2  -6    2.65    0.90
  17   1 -12   -0.09    0.94
  17   1  -9    3.63    1.05
   7   6  -8  130.21    2.52
   8   5  -1  241.44    3.10
   9   6  -4   12.15    1.55
  11   5 -12    1.37    1.33
  11   5  -3   27.71    2.16
  11   6  -9   32.78    2.04
  11   6  -6   98.23    2.82
  13   5 -11    6.98    1.68
  13   5  -6   22.16    2.02
  14   3 -14   19.79    1.31
  14   3  -4   30.93    1.95
  15   3  -6   11.03    1.73
  15   4 -10    9.00    1.61
  15   4  -9    6.06    1.64
  16   3 -10    6.80    1.53
   7   6  -3   11.40    1.15
   8   6  -3   54.46    1.80
   9   3   1  112.95    2.06
   9   4   0    3.48    1.11
  10   5  -2   40.39    1.84
  10   6 -10  257.85    3.69
  10   6  -4  224.56    3.51
  11   6 -10    8.00    1.95
  11   6  -5   23.89    2.19
  12   5  -4   -0.06    1.64
  12   6  -9   13.61    2.16
  12   6  -7    2.93    2.04
  14   1  -2  140.89    2.54
  14   4 -13   34.66    1.78
  14   4  -5   13.24    2.10
  14   5 -10    0.13    1.78
  14   5  -9   20.32    1.98
  14   5  -8    3.35    2.02
  15   4 -11   23.40    1.65
  15   4  -8    2.01    1.62
  16   1  -5    6.64    1.37
  16   3 -11    2.53    1.15
  16   3  -9    4.27    1.40
  17  -1  -6    0.14    0.87
  17   1 -13    6.23    0.85
  17   1  -8    1.57    0.99
  12   3  -1    2.76    1.56
  12   4  -2    5.54    1.69
  12   6 -10   80.99    2.85
  12   6  -6   16.07    2.18
  13   5 -12   29.65    1.88
  13   5  -5   23.79    1.95
  14   5 -11    1.01    1.56
  14   5  -7   38.63    2.34
  15   2  -4    5.13    1.36
  15   3  -5    1.76    1.58
  15   4 -12    5.50    1.44
  15   4  -7   25.23    1.91
  16   2 -14    2.75    0.83
  16   2  -6    2.65    1.34
  16   3 -12    6.48    1.08
  16   3  -8    4.88    1.36
  17   2 -11    3.95    1.01
  17   2 -10    0.68    0.98
   7   5   0   98.21    1.95
   7   6  -2   71.18    1.75
   8   6  -2   68.66    1.89
  10   6  -3   17.46    1.64
  11   5  -2   10.76    1.81
  11   6  -4  118.05    2.84
  12   5  -3    5.92    1.78
  13   4  -3    0.07    1.61
  14   3  -3   72.23    2.32
  15   1  -3    3.40    1.14
  15   3 -14   17.20    1.14
  16   3  -7   13.58    1.58
  17   1  -7    1.79    0.95
  17   2  -9   -0.21    0.92
   8   4   1    2.20    0.89
   8   7  -6    5.77    1.30
   8   7  -5    4.45    1.48
   9   6  -2  127.29    2.52
   9   7  -7  149.26    2.87
   9   7  -6   35.81    1.86
   9   7  -5   18.43    1.80
  10   3   1    5.13    1.26
  10   5  -1   75.11    2.25
  10   7  -7   22.61    1.80
  10   7  -6   52.09    2.35
  12   5 -13   52.81    1.91
  12   6  -5    8.93    1.77
  13   6 -10    4.93    1.80
  14   2  -2   16.47    1.56
  14   5 -12    1.87    1.47
  14   5  -6   23.99    1.91
  15   4  -6   26.20    1.77
  16   3 -13    5.92    0.94
  17   2  -8    3.88    1.10
   7   7  -6   21.14    1.51
   7   7  -5   89.73    2.13
   8   7  -4  105.76    2.47
   9   7  -8   11.19    1.54
  10   7  -8    4.01    1.56
  10   7  -5   17.97    1.97
  11   6  -3   30.23    2.08
  11   7  -8   21.31    2.14
  11   7  -7   29.15    2.20
  15   4 -13    1.18    0.95
  15   5 -10    0.29    1.27
  15   5  -9   41.78    1.98
  15   5  -8    5.41    1.67
  16   2  -5    9.35    1.29
  16   4 -11    2.83    1.18
  16   4 -10    2.56    1.16
  16   4  -9    6.85    1.27
  17   2 -13    0.10    0.59
   7   6  -1    8.20    1.05
   7   7  -7   11.99    1.21
   7   7  -4    2.38    1.04
   8   6  -1    9.57    1.20
   8   7  -8   26.92    1.61
   9   4   1   14.60    1.13
   9   5   0    9.66    1.19
  10   7  -9    8.30    1.57
  11   7  -9  106.20    2.68
  11   7  -6   29.76    2.00
  12   4  -1   13.60    1.61
  12   6  -4   56.27    2.24
  13   6 -11   32.94    1.81
  14   5  -5  110.60    2.70
  14   6  -9    0.19    1.70
  15   2  -3   61.57    1.94
  15   3  -4   24.82    1.59
  15   4  -5    3.40    1.45
  15   5 -11    3.64    1.15
  16   3  -6    5.13    1.21
  16   4  -8    3.46    1.17
  17   1  -6   -0.67    0.85
  17   2  -7   -0.58    0.96
  17   3 -11    2.15    0.86
  17   3 -10    0.55    0.86
   6   7  -5   55.38    1.56
   6   7  -4   28.91    1.42
   7   7  -3    9.84    1.12
   8   7  -3  133.42    2.49
   9   6  -1    9.82    1.52
   9   7  -3  186.77    3.13
  10   7 -10    9.32    1.68
  10   7  -4   13.53    1.67
  11   4   0    9.21    1.54
  11   5  -1    5.44    1.65
  11   7 -10   48.61    2.17
  11   7  -5   43.28    2.12
  12   5  -2    5.56    1.46
  12   6 -12   39.83    1.71
  12   7  -8    9.17    1.71
  14   5 -13    6.33    1.18
  14   6 -10    0.49    1.38
  14   6  -8   14.47    1.76
  14   6  -7    5.31    1.82
  15   5  -7    9.01    1.52
  16   3 -14    1.06    0.66
  17   3 -12    0.55    0.73
  17   3  -9    1.10    0.87
   6   7  -6    9.61    1.05
   6   7  -3    6.86    1.11
   7   7  -8  135.61    2.38
  12   3   0    1.99    1.06
  12   6  -3   12.46    1.80
  12   7  -6    1.45    1.60
  13   6 -12    7.05    1.24
  14   3  -2    9.57    1.42
  14   4  -3   -0.18    1.14
  14   6 -11    8.33    1.37
  15   4 -14    2.59    0.81
  15   5  -6    0.21    1.45
  17   3  -8    3.16    0.89
   6   7  -7   89.14    1.86
   7   7  -2    0.61    0.96
   8   7  -2    2.46    1.11
  10   4   1    4.26    1.26
  10   5   0   31.94    1.59
  10   6  -1    4.36    1.56
  10   7  -3   23.65    1.71
  11   6  -2   53.67    2.00
  11   7  -4    6.87    1.60
  12   7  -5   26.72    1.88
  13   7  -9    5.68    1.55
  13   7  -8    6.08    1.62
  13   7  -7    5.72    1.87
  14   5  -4    5.79    1.38
  14   6  -6    0.88    1.46
  16   3  -5    0.50    1.03
  16   4 -13    0.84    0.69
  17   2  -6    2.36    0.85
   6   7  -2   39.19    1.33
   9   7  -2    4.74    1.34
   9   8  -6    9.38    1.47
  10   8  -7   28.72    2.06
  10   8  -6  130.26    2.94
  12   7 -11   15.28    1.63
  13   7 -10    1.12    1.30
  13   7  -6    9.46    1.88
  15   3  -3   53.44    1.68
  15   4  -4   20.28    1.33
  15   6 -10    5.21    1.29
  15   6  -8   19.76    1.63
  16   5 -11    2.30    0.98
  16   5 -10    3.51    0.98
  16   5  -9    5.95    1.11
  16   5  -8    1.69    1.16
  17   3  -7    6.20    0.98
   8   8  -7    9.84    1.34
   8   8  -6   64.32    1.99
   8   8  -5    7.71    1.31
   9   6   0   27.34    1.65
   9   8  -5   35.64    1.82
  10   7  -2   96.39    2.55
  10   8  -8   79.79    2.34
  10   8  -5   63.67    2.22
  11   7  -3   15.02    1.64
  11   8  -8   47.24    2.24
  11   8  -7   63.60    2.32
  11   8  -6    5.63    1.80
  12   5  -1   32.39    1.76
  12   7  -4   15.62    1.65
  13   4  -1   32.37    1.61
  13   5  -2    1.05    1.47
  14   6  -5    4.05    1.41
  15   5  -5   30.61    1.55
  15   6 -11    2.78    1.16
  17   4 -11    0.93    0.64
  17   4 -10    1.63    0.73
  17   4  -9    1.65    0.77
   6   7  -1   56.98    1.59
   7   7  -1   66.64    1.71
   7   8  -6  126.10    2.30
   7   8  -4   45.01    1.71
   8   7  -1   29.62    1.45
   8   8  -8   71.21    2.17
   8   8  -4    3.78    1.25
   9   8  -4    8.26    1.46
  10   8  -9   57.40    2.05
  11   5   0    2.84    1.21
  11   6  -1   16.15    1.70
  11   8  -9   76.15    2.45
  11   8  -5    3.36    1.77
  12   4   0   35.85    1.49
  13   6  -3   10.14    1.61
  13   7 -11    2.61    1.19
  14   4  -2   18.30    1.49
  14   5  -3   26.75    1.62
  14   7  -9    5.17    1.29
  14   7  -8    2.74    1.36
  16   5 -12    4.59    0.81
  16   5  -7    5.77    1.02
  17   4 -12    0.72    0.60
  17   4  -8   14.70    1.04
   6   6   1   10.68    1.00
   7   5   2   23.46    1.13
   7   6   1    2.74    0.99
   7   8  -7  132.44    2.34
   7   8  -3   71.20    1.98
   8   8  -3   70.00    1.98
   9   7  -1   29.89    1.56
   9   8  -9   91.82    2.25
   9   8  -3    3.75    1.35
  12   8  -9    6.65    1.62
  14   6  -4   13.18    1.51
  14   7  -7    4.03    1.36
  15   6 -12    6.87    0.98
  15   6  -6   20.31    1.53
  16   3  -4   14.61    1.06
  16   4  -5    4.66    0.99
  17   3  -6    8.37    0.88
   6   8  -4   96.09    1.90
   8   5   2   50.73    1.48
   8   6   1    1.74    1.06
  10   5   1   10.42    1.17
  10   6   0   46.29    1.67
  10   8 -10  240.16    3.28
  10   8  -3   10.33    1.73
  11   7  -2    7.19    1.47
  11   8  -4    9.17    1.54
  12   8 -10   15.41    1.60
  13   7 -12    3.56    1.17
  13   7  -4    8.22    1.64
  14   7  -6   20.87    1.58
  15   4  -3   10.55    1.17
  15   5  -4    9.58    1.28
  16   5 -13    0.69    0.60
  16   5  -6    2.01    1.01
   6   7   0   92.66    1.78
   6   8  -6   14.00    1.12
   6   8  -3    5.68    1.00
   7   8  -8  194.38    2.69
   7   8  -2    3.79    1.07
   8   7   0    5.28    1.27
   8   8  -2    9.97    1.28
   9   8 -10    7.94    1.36
   9   8  -2    3.06    1.50
  10   7  -1   35.52    1.65
  13   8  -9   17.34    1.45
  13   8  -8    2.15    1.32
  13   8  -7    1.67    1.36
  15   7  -9    6.67    1.20
  16   6 -10    4.65    0.83
  16   6  -9    0.69    0.83
  16   6  -8    1.72    0.98
  17   5 -10   -0.09    0.63
   6   8  -7   73.49    1.80
   9   6   1   39.48    1.41
   9   7   0    4.52    1.35
   9   9  -6   26.22    1.81
  10   9  -7   96.87    2.50
  10   9  -6  103.43    2.64
  11   8 -11    7.17    1.29
  11   8  -3    0.94    1.33
  13   5  -1    4.58    1.11
  13   6  -2   90.39    2.01
  13   8 -10   22.90    1.47
  13   8  -6   21.37    1.56
  14   7 -12    6.36    1.01
  15   6 -13    1.51    0.66
  15   6  -5    3.24    1.00
  15   7 -10    7.46    0.93
  16   6 -11    1.23    0.60
  17   5  -9    0.49    0.63
   5   7   0    7.16    0.78
   5   8  -4  158.14    2.15
   8   8  -1   44.32    1.80
   8   9  -6    7.44    1.31
   8   9  -5    6.22    1.30
   9   9  -7    2.74    1.34
   9   9  -5   82.32    2.21
   9   9  -4  149.97    2.83
  10   8  -2   67.35    2.03
  10   9  -8   77.76    2.13
  10   9  -5   22.49    1.63
  11   5   1    9.14    1.19
  11   6   0   14.39    1.29
  11   7  -1   22.99    1.65
  12   8 -11   26.20    1.37
  13   7  -3   70.56    1.92
  14   5  -2   26.10    1.28
  15   7 -11   16.41    1.10
  15   7  -7    9.43    1.14
  16   4  -4   10.34    0.90
  16   5  -5   27.33    1.18
  16   6 -12    2.08    0.63
  16   6  -7    2.44    0.84
  17   4  -6    2.49    0.66
  17   5  -8    1.62    0.61
   5   8  -2   68.80    1.57
   6   6   2  185.47    2.07
   6   8  -1    0.75    0.86
   7   6   2  201.04    2.33
   7   9  -5  125.89    2.28
   7   9  -4    3.23    1.28
   8   9  -7  289.64    3.41
   8   9  -4    8.40    1.31
   9   8  -1   11.54    1.55
   9   9  -8   27.74    1.64
  10   6   1    8.82    1.27
  10   7   0    3.78    1.38
  10   9  -9   33.95    1.79
  10   9  -4    6.79    1.41
  12   9  -7    2.62    1.54
  13   8 -11   -0.50    0.91
  14   7  -4    7.07    1.26
  14   8  -9    0.91    1.00
  14   8  -7    2.10    1.09
  15   5  -3    0.30    0.93
  15   7  -6    2.53    1.05
   6   5   3   10.60    0.72
   6   7   1    6.37    0.85
   7   7   1   19.06    1.11
   7   9  -6    2.82    1.13
   7   9  -3   74.88    2.00
   8   6   2   42.34    1.47
   8   7   1  212.65    2.65
   8   9  -8   15.20    1.46
   8   9  -3   15.95    1.42
   9   9  -3   49.68    1.84
  11   8  -2   18.81    1.47
  12   8  -3   15.27    1.51
  12   9  -9   11.23    1.52
  12   9  -8    1.32    1.27
  12   9  -6    2.18    1.33
  13   8  -4    2.20    1.35
  14   8  -6    5.60    1.28
  15   7 -12    2.24    0.70
  16   6  -6   17.05    0.95
  17   5  -7    0.84    0.62
   5   8  -1   72.01    1.48
   6   9  -5  121.58    2.20
   6   9  -4   13.55    1.29
   7   8   0   30.87    1.29
   7   9  -7    3.95    1.12
   8   8   0   50.58    1.71
   8   9  -2   10.09    1.49
  10   8  -1   56.04    1.78
  10   9  -3   25.63    1.61
  11   9 -10   20.89    1.46
  12   9  -5   14.06    1.46
  13   6  -1    1.89    1.08
  13   9  -8    2.09    1.28
  16   7 -10    2.51    0.71
   4   8  -3   76.38    1.46
   4   8  -2  147.92    1.93
   6   8   0   96.03    1.76
   6   9  -6   47.08    1.61
   6   9  -3   57.57    1.58
   7   9  -2   89.99    1.97
   9   6   2    6.93    1.12
   9   7   1  130.93    2.14
   9   9  -2   48.29    1.79
  12   6   0    3.73    1.00
  12   7  -1   24.19    1.38
  12   9 -10    0.53    1.03
  13   7  -2    3.00    1.06
  13   9  -7   12.07    1.28
  14   8  -5    0.94    0.98
  15   7  -5    9.43    0.95
  15   8  -9    7.58    0.94
  16   7  -8    3.66    0.73
   5   8   0  110.81    1.80
   6   9  -2    1.47    0.96
   9   8   0   11.86    1.20
   9   9 -10    1.58    1.12
  12   8  -2   62.82    1.79
  12   9  -4    6.48    1.29
  13   8  -3    6.25    1.22
  14   7  -3   21.78    1.17
  15   8  -7   -0.61    0.90
  16   6  -5    0.05    0.69
  16   7 -11    2.86    0.46
  16   7  -7    1.75    0.73
   4   8  -1   56.07    1.24
   5   9  -4    0.16    0.82
   6   6   3   26.51    1.03
   6   7   2    7.27    0.78
   6   9  -7   23.28    1.23
   8   9  -1   36.15    1.54
   8  10  -6   22.08    1.60
   8  10  -5   19.01    1.40
   8  10  -4   17.95    1.59
   9  10  -7   27.89    1.52
   9  10  -5   89.31    2.15
   9  10  -4   30.58    1.75
  10   7   1    3.58    1.13
  10  10  -5   -1.22    1.21
  11  10  -7    6.76    1.30
  11  10  -6   55.15    1.99
  12   9 -11   17.27    1.14
  13   9  -5   16.16    1.24
  14   8 -12    1.21    0.59
  14   9  -8    6.17    1.00
  15   6  -3   12.28    0.90
   5   6   3   18.40    0.77
   5   7   2   29.63    0.96
   5   9  -2   11.35    0.96
   6   8   1    6.87    0.90
   6   9  -1    4.74    1.00
   7   6   3    5.74    0.78
   7  10  -5    2.89    1.29
   7  10  -4    4.48    1.31
   8   7   2    7.25    0.95
   8   8   1    2.16    1.15
   8  10  -7   16.75    1.32
   8  10  -3  103.27    2.29
   9   9  -1  194.33    2.75
  10   6   2    4.41    1.00
  10  10  -4    8.99    1.37
  11  10  -8   42.31    1.60
  11  10  -5    0.71    1.24
  12   9  -3    3.77    1.15
  12  10  -7    1.28    1.22
  13   9 -11   15.50    1.00
  14   8  -4    2.03    0.86
  14   9  -9    2.03    0.82
  14   9  -7    7.92    0.96
  15   7  -4    1.96    0.77
  15   8  -6    0.57    0.72
  16   7  -6    0.74    0.63
   4   8   0  132.60    1.73
   5   8   1   41.23    1.16
   5   9  -6   53.82    1.52
   7  10  -6  164.45    2.43
   7  10  -3    1.41    1.09
   8   6   3   43.18    1.28
   9  10  -3    5.95    1.30
  10   9  -1   40.77    1.60
  10  10  -9   15.27    1.33
  11  10  -9    2.14    1.02
  11  10  -4    8.62    1.47
  12   7   0   12.71    1.14
  12  10  -8   23.58    1.30
  12  10  -6    4.62    1.11
  13   7  -1    1.11    0.95
  13   9  -4    4.88    1.03
  14   9 -10    3.24    0.75
  14   9  -6   16.65    1.05
   4   7   2    4.99    0.64
   5   9  -1   44.83    1.31
   6   9   0    9.14    0.98
   6  10  -4  328.10    3.26
   7  10  -7   26.09    1.41
   8  10  -8   41.82    1.55
   8  10  -2    4.04    1.19
   9   7   2   16.94    1.10
   9   8   1   47.22    1.52
   9  10  -2   49.42    1.83
  12   8  -1   15.45    1.15
  12  10  -9    5.57    0.99
  13   6   0   33.79    1.16
  13   8  -2    6.06    0.95
  14   6  -1    1.04    0.71
  14   7  -2    3.39    0.83
  15   8  -5    0.97    0.65
  16   8  -9    1.37    0.49
   4   9  -3  250.49    2.45
   5   9  -7   31.14    1.34
   6  10  -5   11.26    1.15
   6  10  -3    7.81    1.10
   9   9   0   56.97    1.68
  11   9  -1   11.52    1.32
  11  10 -10  120.65    1.95
  11  10  -3    6.23    1.19
  12   9  -2    0.82    0.96
  12  10  -4    3.81    1.20
  13  10  -9    4.61    0.95
  13  10  -7    2.40    0.92
  13  10  -6    0.71    1.00
  14   8  -3    1.45    0.82
  14   9 -11    1.41    0.59
  14   9  -5    5.59    0.85
  15   9  -9    1.05    0.62
  15   9  -8    0.97    0.68
  16   7  -5    5.41    0.62
  16   8  -8   10.11    0.65
   4   9  -1  270.07    2.51
   5   7   3   79.90    1.39
   5   9   0   -0.16    0.78
   6  10  -6   71.77    1.68
   6  10  -2  370.49    3.33
   7   7   3   27.19    1.16
   7  10  -8    3.32    1.16
   7  10  -1    1.91    1.24
   8  10  -9    0.15    1.05
   8  10  -1   23.60    1.38
  10   8   1    4.84    1.00
  10  11  -6    7.14    1.37
  13   9  -3    4.26    0.88
  15   7  -3    1.19    0.61
  15   9 -10    2.76    0.57
  16   8  -7   -0.05    0.43
   5   8   2   50.22    1.23
   5  10  -4  123.01    1.95
   5  10  -3   33.14    1.24
   6   9   1   25.31    1.13
   6  10  -7   20.54    1.34
   6  10  -1   29.84    1.30
   7   9   1   96.89    1.84
   8   7   3    3.17    0.91
   8   8   2   30.65    1.20
   8   9   1    9.98    1.20
   8  11  -6    0.41    1.27
   8  11  -5   12.17    1.23
   8  11  -4   38.10    1.69
   9  10  -1   66.80    1.76
   9  11  -4   29.03    1.51
  10   7   2    6.17    0.89
  10  11  -5   45.21    1.65
  11  11  -6    2.14    1.17
  13  10 -10    3.37    0.73
  13  10  -5   14.24    1.06
  14   9  -4    2.56    0.80
   4   7   3   73.50    1.24
   4   9  -6   95.94    1.71
   4   9   0   54.66    1.25
   5   9   1   44.83    1.31
   5  10  -5   29.00    1.20
   5  10  -2  172.38    2.24
   7  11  -4   23.01    1.53
   8  11  -7   62.87    1.81
   8  11  -3   44.12    1.58
   9   8   2    8.34    1.06
   9   9   1   13.23    1.28
  10  11  -4    0.90    1.12
  11  10  -2   25.56    1.30
  11  11  -8   16.45    1.20
  11  11  -5    2.89    1.00
  12   8   0   54.53    1.40
  12  10 -11   -0.18    0.66
  12  10  -3    4.41    0.97
  13   8  -1    7.39    0.88
  14   9 -12    0.99    0.42
  14  10  -9    3.52    0.70
  14  10  -8    5.53    0.70
  14  10  -7    2.13    0.68
  15   9  -6    1.93    0.58
   3   8   1    5.14    0.59
   3   9  -2   20.44    0.94
   4   8   2   71.35    1.29
   5  10  -6   41.79    1.45
   6  10   0   60.03    1.68
   7  10   0   13.63    1.16
   7  11  -6   35.73    1.54
   7  11  -3    3.46    1.13
   8  10   0  111.32    2.03
  10  11  -3   14.33    1.25
  11   8   1   17.92    1.13
  11   9   0   18.03    1.23
  11  11  -4   18.96    1.22
  12   9  -1   19.77    1.06
  12  11  -8    4.70    0.96
  13   7   0    1.69    0.63
  13   9  -2    7.45    0.83
  13  10  -4    2.33    0.80
  14  10  -6    2.05    0.67
   3   9  -3  125.91    1.66
   3   9  -1   37.70    1.02
   6   8   3    3.30    0.90
   6  11  -4    3.02    1.15
   6  11  -3   93.24    1.97
   7  11  -2   45.39    1.53
   8  11  -2    3.14    1.13
   9   7   3    2.35    0.84
   9  10   0   38.38    1.41
  10  11  -9   57.79    1.39
  11  11  -9   16.07    0.97
  12  10  -2    1.06    0.91
  12  11  -5    1.98    0.88
  13  10 -11    0.42    0.53
  14   9  -3    1.05    0.69
  14  10 -10    1.71    0.50
  15   9  -5    3.16    0.53
   3   8   2   12.05    0.78
   4  10  -4    7.34    0.85
   4  10  -3   69.97    1.49
   4  10  -2   97.82    1.65
   5   8   3   10.21    0.78
   5   9   2    7.92    0.93
   5  10   0   23.83    1.12
   6   7   4   19.85    0.93
   6   9   2    8.84    0.94
   6  11  -5    8.92    1.08
   6  11  -2   48.87    1.51
   7   8   3   56.42    1.32
   7   9   2    2.53    0.90
   8   9   2   24.63    1.29
   9  11  -9    5.85    0.99
  10   9   1   23.97    1.11
  10  11  -2    2.02    1.04
  11  10  -1    5.90    0.94
  12  11  -4   -0.32    0.94
  13  10  -3    3.05    0.79
  13  11  -8    2.37    0.70
  13  11  -7    6.22    0.72
  14  10  -5    1.50    0.61
  15   7  -2    0.22    0.44
   4   8   3    1.97    0.70
   4  10  -1   18.50    0.96
   5   7   4    4.29    0.60
   5  10  -7    1.34    0.82
   6  10   1   22.40    1.14
   6  11  -6    1.29    0.89
   7  10   1   30.06    1.30
   7  11  -1    5.07    1.09
   8   8   3    0.30    0.74
   8  10   1   38.05    1.47
   8  11  -1   17.19    1.23
  10  10   0    8.33    1.00
  11  11 -10    0.70    0.72
  13  11  -9    1.70    0.61
  13  11  -6   14.88    0.85
   3   9   1   39.96    1.10
   4   9   2   64.68    1.27
   4  10   0   35.32    1.15
   5  10   1   24.67    1.08
   5  11  -4   57.38    1.49
   5  11  -3  168.67    2.25
   5  11  -2  187.57    2.34
   6  11  -1    2.55    1.01
   7  11  -8    1.61    0.97
   9  12  -6    5.43    0.96
   9  12  -4   77.11    1.77
  10  12  -7   11.17    1.13
  10  12  -6   30.58    1.25
  10  12  -5    3.97    0.99
  12   9   0    2.06    0.79
  12  11 -10    1.11    0.54
  13  11  -5    3.91    0.70
  14  10  -4    1.06    0.51
  15   9  -4    1.10    0.45
   4  10  -6   20.31    1.13
   5  11  -5   54.15    1.44
   5  11  -1  143.95    2.15
   6  11  -7   12.76    1.02
   6  11   0    2.98    1.16
   7  11   0   60.87    1.60
   7  12  -5    5.75    1.18
   7  12  -4   14.69    1.31
   8  11   0   52.11    1.49
   9  12  -7    3.44    0.93
   9  12  -3   19.96    1.23
  10  11  -1    3.48    0.95
  10  12  -4   44.94    1.40
  11   9   1   38.18    1.15
  11  10   0   26.97    1.12
  11  12  -7    0.56    0.74
  11  12  -6   31.66    1.17
  11  12  -5    1.37    0.84
  12   8   1    1.42    0.65
  12  10  -1    0.92    0.80
  13   8   0    2.21    0.54
  13  11 -10    4.78    0.54
   2   9  -3  138.24    1.62
   2   9  -2    3.12    0.56
   2   9  -1  220.73    1.94
   3   7   4   52.54    1.01
   3  10  -1   17.65    0.86
   4  10   1    2.75    0.76
   5   9   3   14.35    1.00
   6   8   4   42.37    1.17
   6  10   2   86.31    1.68
   7   9   3   76.83    1.47
   7  10   2   15.51    1.13
   7  12  -6   72.78    1.75
   7  12  -3    2.09    1.04
   8  12  -7   10.74    1.05
   9  11   0    5.93    1.01
   9  12  -8   28.79    1.22
  11  12  -8    9.19    0.77
  11  12  -4    7.24    0.86
  12  12  -7    8.32    0.79
  13  11  -4    0.63    0.59
  14   8  -1    0.63    0.41
  14   9  -2    1.63    0.49
  14  11  -8    2.71    0.49
  14  11  -7    5.50    0.53
  14  11  -6    3.55    0.55
   2   9   0    1.07    0.53
   3   9   2    1.09    0.61
   3  10   0  245.03    2.26
   4  11  -3   11.87    0.99
   4  11  -2   19.66    1.04
   5   8   4    7.39    0.77
   5  10   2   67.68    1.42
   5  11  -6    5.72    0.91
   5  11   0    2.83    0.93
   6  12  -4   19.81    1.16
   6  12  -3   24.11    1.25
   7   8   4   29.86    1.11
   7  12  -2   18.18    1.22
   8   9   3   99.38    1.66
   9  12  -2   28.16    1.27
  10   9   2   21.38    0.94
  11  11  -1   14.77    1.00
  12  12  -8    5.45    0.69
  12  12  -5   -0.26    0.63
  14  11  -9    2.39    0.36
   2   9  -4   43.06    1.06
   4   8   4   94.95    1.36
   4   9   3   66.09    1.28
   4  11  -4  120.11    1.85
   4  11  -1   55.48    1.38
   6  11   1    5.43    0.96
   6  12  -5   57.18    1.50
   6  12  -2    5.86    1.06
   7  12  -1   47.69    1.46
   8  12  -8    8.68    0.99
  10  12  -9    0.34    0.69
  10  12  -2   29.54    1.17
  11  12  -9   -0.68    0.61
  11  12  -3    0.55    0.72
  12  12  -4    2.92    0.74
  13  11  -3    2.11    0.59
   2   8   3   48.43    1.00
   3  10   1   44.50    1.14
   4  10   2   70.80    1.39
   4  11   0   18.62    1.03
   5   7   5   28.29    0.85
   5  11   1   11.08    1.00
   6  12  -6  138.34    2.07
   9   9   3   27.56    1.04
   9  10   2   73.86    1.42
   9  12  -9   -0.26    0.75
   9  12  -1   14.12    1.07
  13  12  -7    3.16    0.53
  13  12  -6    4.57    0.55
   4   7   5   88.94    1.21
   5  12  -4    7.45    1.00
   5  12  -2   57.52    1.51
   5  12  -1   10.31    1.20
   6   9   4   45.34    1.19
   6  10   3    3.08    0.82
   7  10   3  143.61    1.92
   7  12   0    6.01    1.01
   8  12   0    5.57    1.12
   8  13  -4    2.28    1.08
   9  13  -6    0.73    0.91
   9  13  -5   29.26    1.13
   9  13  -4   20.20    1.06
  10  12  -1    2.66    0.86
  10  13  -6    1.36    0.79
  11  10   1   16.81    0.85
  11  12  -2   10.30    0.77
  13  10  -1    1.88    0.50
  13  12  -8    2.20    0.45
  13  12  -5    3.73    0.55
   2  10  -3   31.01    1.04
   2  10  -2   44.49    1.06
   2  10  -1    7.37    0.71
   2  10   0  242.17    2.12
   3  10   2    5.23    0.71
   3  11  -3  116.62    1.79
   3  11  -2   10.75    0.90
   3  11  -1  262.70    2.41
   4  11  -6   23.18    1.13
   4  11   1   10.00    0.93
   5   9   4    0.64    0.70
   5  10   3   77.95    1.47
   5  12  -5   19.45    1.07
   6  11   2    1.07    0.85
   6  12  -7    3.46    0.98
   6  12   0    4.19    0.99
   7   9   4   11.27    0.96
   7  11   2   56.12    1.34
   8  13  -6   29.18    1.21
   8  13  -3   78.12    1.63
   9  12   0    5.14    0.99
  10  13  -7   12.14    0.87
  10  13  -4    0.99    0.69
  11   9   2    1.78    0.63
  11  11   0   13.46    0.79
  11  13  -6    3.37    0.70
  12  11  -1    5.43    0.61
  12  12  -3    3.96    0.57
  14  11  -4    1.69    0.32
   1   9  -1  147.25    1.52
   1   9   0   86.59    1.20
   2  10   1    7.58    0.79
   3   7   5  413.99    2.35
   3  11   0   12.31    0.87
   4   9   4   45.07    1.08
   4  10   3   24.48    0.98
   4  12  -3  193.10    2.33
   4  12  -2  458.54    3.41
   5   8   5   40.75    1.06
   5  11   2   15.61    1.01
   5  12   0   27.97    1.22
   6   8   5   23.27    0.93
   7  13  -5   35.42    1.29
   8  11   2   31.77    1.15
   8  13  -2    6.49    0.98
  10  10   2   38.08    1.01
  10  11   1   78.79    1.33
  10  13  -3   13.63    0.88
  11  13  -7    3.61    0.58
  11  13  -4    0.65    0.67
  13  11  -2    1.69    0.46
  13  12  -4    4.64    0.50
   1   9   1  229.72    1.86
   2   8   4   50.92    0.95
   2   9   3   70.46    1.16
   2  10  -4   13.23    0.92
   3  11   1  168.50    2.05
   4   8   5   47.04    0.99
   4  11   2   48.25    1.26
   4  12  -4  169.11    2.20
   4  12  -1   17.23    1.07
   5  12  -6    4.64    0.89
   6  12   1    1.74    0.91
   6  13  -3   14.67    1.11
   7  13  -6    5.94    0.89
   8  12   1    8.12    1.03
   8  13  -7   33.52    1.10
  10  12   0   29.73    1.03
  10  13  -8    0.67    0.61
  11  12  -1    1.86    0.58
  11  13  -8    1.07    0.52
  12  12  -2    1.26    0.53
   2   7   5  107.34    1.23
   2  10   2    7.90    0.80
   3   9   4   21.51    0.84
   3  10   3   16.61    0.85
   4  12   0  257.38    2.55
   5  12   1   -0.24    0.87
   7  13  -1    7.70    1.02
   8  13  -1   26.45    1.13
   9  10   3    0.01    0.74
   9  11   2    2.67    0.70
   9  13  -8    1.59    0.61
  10  13  -2    2.28    0.62
  11  13  -3   12.70    0.70
  12  13  -7    1.55    0.41
  12  13  -6    7.44    0.53
  12  13  -5    3.10    0.53
   1   9   2   50.48    0.97
   2  11  -2    3.26    0.84
   2  11  -1   81.38    1.47
   3   8   5    0.59    0.52
   3  11   2   11.26    1.02
   4  12  -5   37.13    1.21
   5  10   4    4.92    0.76
   5  13  -3   14.12    1.08
   5  13  -2   -0.54    0.95
   6  10   4  105.22    1.57
   6  11   3    1.23    0.78
   9  12   1    1.59    0.73
  12  10   1    1.00    0.43
  12  13  -8    3.22    0.43
  12  13  -4    1.69    0.47
  13  12  -3    2.51    0.42
[truncated: 1,296,880 more chars]
