# Supplementary material for: A Tail Does Not Always Make a Difference: Assembly of cds Nets from Co(NCS)2 and 1,4-bis(n-Alkyloxy)-2,5-bis(3,2′:6′,3″-terpyridin-4′-yl)benzene Ligands
Source: Molecules. 2022 Aug 5;27(15):4995. doi: 10.3390/molecules27154995 (PMC9370426; doi:10.3390/molecules27154995)
Supplement: Supplementary file 1 [file molecules-27-04995-s001.zip › CAS_091_6_150K.cif]

data_cas_091_6_150k
_audit_creation_date               2022-01-05
_audit_creation_method
;
Olex2 1.5
(compiled 2021.12.09 svn.r5202d8cf for OlexSys, GUI svn.r6439)
;
_shelx_SHELXL_version_number       '2018/3'
loop_
  _audit_author_name
  _audit_author_email
  _audit_author_address
 'Capomolla, S.' simona.capomolla@unibas.ch
;
University of Basel
Department of Chemistry
Mattenstrasse 24a
Basel
Switzerland
;
 'Prescimone, A.' alessandro.prescimone@unibas.ch
;
University of Basel
Department of Chemistry
Mattenstrasse 24a
Basel
Switzerland
;

_audit_contact_author_address
;
University of Basel
Department of Chemistry
Mattenstrasse 24a
Basel
Switzerland
;
_audit_contact_author_email        alessandro.prescimone@unibas.ch
_audit_contact_author_name         'Prescimone, A.'
_audit_contact_author_phone        ''
_publ_contact_author_id_orcid      https://orcid.org/0000-0002-3631-5210
_publ_section_references
;
Dolomanov, O.V., Bourhis, L.J., Gildea, R.J, Howard, J.A.K. & Puschmann, H.
 (2009), J. Appl. Cryst. 42, 339-341.

Sheldrick, G.M. (2015). Acta Cryst. A71, 3-8.

Sheldrick, G.M. (2015). Acta Cryst. C71, 3-8.
;
_chemical_name_common              ?
_chemical_name_systematic          ?
_chemical_formula_moiety          
 'C92 H80 Co2 N16 O4 S4, 5.333(C6 H4 Cl2), 5.667[(C6H4Cl2)]'
_chemical_formula_sum              'C152.34 H135.33 Cl10.67 Co2 N16 O4 S4'
_chemical_formula_weight           2878.52
_chemical_melting_point            ?
loop_
  _atom_type_symbol
  _atom_type_description
  _atom_type_scat_dispersion_real
  _atom_type_scat_dispersion_imag
  _atom_type_scat_source
 'C' 'C' 0.0181 0.0091 'International Tables Vol C Tables 4.2.6.8 and 6.1.1.4'
 'Cl' 'Cl' 0.3639 0.7018 'International Tables Vol C Tables 4.2.6.8 and 6.1.1.4'
 'Co' 'Co' -2.3653 3.6143
 'International Tables Vol C Tables 4.2.6.8 and 6.1.1.4'
 'H' 'H' 0.0000 0.0000 'International Tables Vol C Tables 4.2.6.8 and 6.1.1.4'
 'N' 'N' 0.0311 0.0180 'International Tables Vol C Tables 4.2.6.8 and 6.1.1.4'
 'O' 'O' 0.0492 0.0322 'International Tables Vol C Tables 4.2.6.8 and 6.1.1.4'
 'S' 'S' 0.3331 0.5567 'International Tables Vol C Tables 4.2.6.8 and 6.1.1.4'

_shelx_space_group_comment
;
The symmetry employed for this shelxl refinement is uniquely defined
by the following loop, which should always be used as a source of
symmetry information in preference to the above space-group names.
They are only intended as comments.
;
_space_group_crystal_system        'monoclinic'
_space_group_IT_number             14
_space_group_name_H-M_alt          'P 1 21/c 1'
_space_group_name_Hall             '-P 2ybc'
loop_
  _space_group_symop_operation_xyz
 'x, y, z'
 '-x, y+1/2, -z+1/2'
 '-x, -y, -z'
 'x, -y-1/2, z-1/2'

_cell_length_a                     15.0516(10)
_cell_length_b                     14.9277(5)
_cell_length_c                     46.097(2)
_cell_angle_alpha                  90
_cell_angle_beta                   98.736(4)
_cell_angle_gamma                  90
_cell_volume                       10237.1(9)
_cell_formula_units_Z              3
_cell_measurement_reflns_used      46884
_cell_measurement_temperature      150
_cell_measurement_theta_max        71.11
_cell_measurement_theta_min        3.29
_shelx_estimated_absorpt_T_max     0.640
_shelx_estimated_absorpt_T_min     0.527
_exptl_absorpt_coefficient_mu      4.895
_exptl_absorpt_correction_T_max    0.6567
_exptl_absorpt_correction_T_min    0.4536
_exptl_absorpt_correction_type     multi-scan
_exptl_absorpt_process_details
;
STOE X-Red32, absorption correction by Gaussian integration, analogous to
P. Coppens in: F. R. Ahmed (Editor), "Crystallographic Computing", Munksgaard,
Copenhagen (1970), 255 - 270. Afterwards scaling of reflection intensities was
performed within STOE LANA. J. Koziskova, F. Hahn, J. Richter, J. Kozisek, Acta
Chimica Slovaca, vol. 9, no. 2, 2016, pp. 136 - 140.
Finally a spherical absorption correction was done within STOE LANA.
;
_exptl_absorpt_special_details     ?
_exptl_crystal_colour              pink
_exptl_crystal_colour_primary      pink
_exptl_crystal_density_diffrn      1.401
_exptl_crystal_density_meas        ?
_exptl_crystal_density_method      'not measured'
_exptl_crystal_description         block
_exptl_crystal_F_000               4478
loop_
  _exptl_crystal_face_index_h
  _exptl_crystal_face_index_k
  _exptl_crystal_face_index_l
  _exptl_crystal_face_perp_dist
 -3 -2 -30 0.0989
 7 1 -30 0.0872
 -6 1 30 0.0606
 3 -2 30 0.0503
 -1 0 -3 0.1116
 3 2 30 0.1205
 1 0 3 0.1110
 -2 1 -15 0.0516
 6 -1 -30 0.0718

_exptl_crystal_recrystallization_method
;
The material was recrystallised from a mixture of methanol and 
Dichlorobenzene  by solvent layering
;
_exptl_crystal_size_max            0.15
_exptl_crystal_size_mid            0.117
_exptl_crystal_size_min            0.1
_exptl_transmission_factor_max     ?
_exptl_transmission_factor_min     ?
_diffrn_reflns_av_R_equivalents    0.0550
_diffrn_reflns_av_unetI/netI       0.0399
_diffrn_reflns_Laue_measured_fraction_full  0.991
_diffrn_reflns_Laue_measured_fraction_max  0.918
_diffrn_reflns_limit_h_max         18
_diffrn_reflns_limit_h_min         -14
_diffrn_reflns_limit_k_max         16
_diffrn_reflns_limit_k_min         -18
_diffrn_reflns_limit_l_max         36
_diffrn_reflns_limit_l_min         -57
_diffrn_reflns_number              80876
_diffrn_reflns_point_group_measured_fraction_full  0.991
_diffrn_reflns_point_group_measured_fraction_max  0.918
_diffrn_reflns_theta_full          67.686
_diffrn_reflns_theta_max           73.932
_diffrn_reflns_theta_min           3.787
_diffrn_ambient_temperature        150
_diffrn_detector                   'EIGER2 1M'
_diffrn_detector_area_resol_mean   13.33
_diffrn_detector_type              'DECTRIS EIGER2 1M'
_diffrn_measured_fraction_theta_full  0.991
_diffrn_measured_fraction_theta_max  0.918
_diffrn_measurement_details
;
 1955 frames, detector distance = 40 mm
;
_diffrn_measurement_device         'Eulerian 4-circle diffractometer'
_diffrn_measurement_device_type    'STOE STADIVARI Cu'
_diffrn_measurement_method         'rotation method, \w scans'
_diffrn_radiation_collimation      '1.2 0.6 mm diameter'
_diffrn_radiation_monochromator    'Graded multilayer mirror'
_diffrn_radiation_polarisn_norm    270
_diffrn_radiation_probe            x-ray
_diffrn_radiation_type             'Cu K\a'
_diffrn_radiation_wavelength       1.54186
_diffrn_source                     'Axo Cu'
_diffrn_source_current             1.00
_diffrn_source_power               0.050
_diffrn_source_voltage             50
_diffrn_special_details            ?
_reflns_Friedel_coverage           0.000
_reflns_Friedel_fraction_full      .
_reflns_Friedel_fraction_max       .
_reflns_number_gt                  12630
_reflns_number_total               19075
_reflns_special_details
;
 Reflections were merged by SHELXL according to the crystal
 class for the calculation of statistics and refinement.
 
 Structure factors included contributions from the .fab file.
 
 _reflns_Friedel_fraction is defined as the number of unique
 Friedel pairs measured divided by the number that would be
 possible theoretically, ignoring centric projections and
 systematic absences.
;
_reflns_threshold_expression       'I > 2\s(I)'
_computing_cell_refinement
;
X-Area Recipe 1.36.0.0 (STOE, 2020)
;
_computing_data_collection
;
X-Area Pilatus3_SV 1.31.170.0 (STOE, 2020)
;
_computing_data_reduction
;
X-Area Integrate 1.78.3.0 (STOE, 2020)
X-Area LANA 1.83.8.0 (STOE, 2020)
;
_computing_molecular_graphics      'Olex2 1.5 (Dolomanov et al., 2009)'
_computing_publication_material
;
STOE & Cie GmbH, X-Area, software package for collecting single-crystal or
multi-domain crystal data on STOE area-detector diffractometers, for image 
processing, for the correction and scaling of reflection intensities and 
for outlier rejection, version 1.90, Darmstadt 2020
;
_computing_structure_refinement    'SHELXL 2018/3 (Sheldrick, 2015)'
_computing_structure_solution      'SHELXT 2018/2 (Sheldrick, 2018)'
_refine_diff_density_max           1.680
_refine_diff_density_min           -0.999
_refine_diff_density_rms           0.155
_refine_ls_extinction_coef         .
_refine_ls_extinction_method       none
_refine_ls_goodness_of_fit_ref     1.082
_refine_ls_hydrogen_treatment      constr
_refine_ls_matrix_type             full
_refine_ls_number_parameters       1014
_refine_ls_number_reflns           19075
_refine_ls_number_restraints       126
_refine_ls_R_factor_all            0.1699
_refine_ls_R_factor_gt             0.1267
_refine_ls_restrained_S_all        1.087
_refine_ls_shift/su_max            0.001
_refine_ls_shift/su_mean           0.000
_refine_ls_structure_factor_coef   Fsqd
_refine_ls_weighting_details      
 'w=1/[\s^2^(Fo^2^)+(0.1300P)^2^+85.0000P] where P=(Fo^2^+2Fc^2^)/3'
_refine_ls_weighting_scheme        calc
_refine_ls_wR_factor_gt            0.3098
_refine_ls_wR_factor_ref           0.3534
_refine_special_details
;
This structure contains a lot of disorder.
Half of the solvent had to be treated with the solvent mask, the one
that has been modelled is also disorderd so sadi and some eadp 
restraints had to be used.
All the S atoms are also disordered over 2 or 3 orientations.
One aliphatic is partly disordered
;
_olex2_refinement_description
;
1. Fixed Uiso
 At 1.2 times of:
  All C(H) groups, All C(H,H) groups, All C(H,H,H,H) groups
 At 1.5 times of:
  All C(H,H,H) groups, All C(H,H,H,H,H,H) groups
2. Restrained distances
 C67-C64 \\sim C65-C64
 with sigma of 0.02
 S3-C68 \\sim S2-C68 \\sim S1-C68
 with sigma of 0.02
 C67-C66 \\sim C66-C65
 with sigma of 0.02
 S5-C70 \\sim S6-C70
 with sigma of 0.02
 S8-C69 \\sim S4-C69 \\sim S9-C69
 with sigma of 0.02
 Cl-C97 \\sim Cl5-C99 \\sim Cl3-C96 \\sim Cl97-C98 \\sim Cl71-C73 \\sim Cl4-C74
\\sim Cl78-C86 \\sim Cl2-
 C78 \\sim Cl1-C82 \\sim Cl88-C87 \\sim Cl72-C79 \\sim Cl82-C81
 with sigma of 0.02
3. Rigid bond restraints
 S2, S1
 with sigma for 1-2 distances of 0.01 and sigma for 1-3 distances of 0.01
 S2, S1, S3
 with sigma for 1-2 distances of 0.01 and sigma for 1-3 distances of 0.01
 S6
 with sigma for 1-2 distances of 0.01 and sigma for 1-3 distances of 0.01
 C35, C34, C32, C33, C36
 with sigma for 1-2 distances of 0.01 and sigma for 1-3 distances of 0.01
4. Uiso/Uaniso restraints and constraints
S1 \\sim S2: within 2A with sigma of 0.04 and sigma for terminal atoms of 0.08
within 2A
S6: within 2A with sigma of 0.04 and sigma for terminal atoms of 0.08 within 2A
S2 \\sim S1 \\sim S3: within 2A with sigma of 0.04 and sigma for terminal atoms
of 0.08 within 2A
C34 \\sim C32 \\sim C33 \\sim C36 \\sim C35: within 2A with sigma of 0.04 and
sigma for terminal atoms of 0.08 within 2A
Uanis(C67) = Uanis(C65)
Uanis(S6) = Uanis(S5)
Uanis(S2) = Uanis(S1) = Uanis(S3)
Uanis(S8) = Uanis(S4) = Uanis(S9)
Uanis(Cl1) = Uanis(Cl88) = Uanis(Cl78) = Uanis(Cl2)
Uanis(C87) = Uanis(C90) = Uanis(C91) = Uanis(C92) = Uanis(C89) = Uanis(C86) =
Uanis(C72) = Uanis(C78) = Uanis(C88) = Uanis(C93) = Uanis(C94) = Uanis(C82)
5. Others
 Fixed Sof: S4(0.6) S2(0.5) H64A(0.75) H64B(0.75) H64C(0.25) H64D(0.25)
 C65(0.75) H65A(0.75) H65B(0.75) H66D(0.25) H66E(0.25) H66F(0.25) H66A(0.75)
 H66B(0.75) H66C(0.75) S1(0.2) C67(0.25) H67A(0.25) H67B(0.25) S6(0.7) S3(0.3)
 S5(0.3) S8(0.2) S9(0.2) Cl78(0.5) C87(0.5) C90(0.5) H90(0.5) C91(0.5) H91(0.5)
 C92(0.5) H92(0.5) C89(0.5) H89(0.5) C86(0.5) Cl88(0.5) C72(0.5) H72(0.5)
 C78(0.5) C82(0.5) C88(0.5) H88(0.5) C93(0.5) H93(0.5) C94(0.5) H94(0.5)
 Cl1(0.5) Cl2(0.5) Cl97(0.5) C98(0.5) C101(0.5) H101(0.5) C103(0.5) H103(0.5)
 C104(0.5) H104(0.5) C102(0.5) H102(0.5) C99(0.5) Cl(0.5) Cl3(0.5) C96(0.5)
 C107(0.5) H107(0.5) C106(0.5) H106(0.5) C105(0.5) H105(0.5) C100(0.5)
 H100(0.5) C97(0.5) Cl5(0.5)
6.a Riding coordinates:
 C55(H55A,H55B), C59(H59A,H59B), C64(H64C,H64D), C62(H62A,H62B,H62C), C66(H66D,
 H66E,H66F), C66(H66A,H66B,H66C)
6.b Secondary CH2 refined with riding coordinates:
 C63(H63A,H63B), C64(H64A,H64B), C56(H56A,H56B), C60(H60A,H60B), C57(H57A,
 H57B), C61(H61A,H61B), C65(H65A,H65B), C67(H67A,H67B)
6.c Aromatic/amide H refined with riding coordinates:
 C47(H47), C42(H42), C23(H23), C44(H44), C9(H9), C5(H5), C7(H7), C33(H33),
 C30(H30), C54(H54), C17(H17), C12(H12), C26(H26), C37(H37), C15(H15), C13(H13),
  C36(H36), C50(H50), C29(H29), C3(H3), C52(H52), C34(H34), C20(H20), C1(H1),
 C48(H48), C39(H39), C27(H27), C38(H38), C35(H35), C28(H28), C14(H14), C2(H2),
 C49(H49), C77(H77), C71(H71), C4(H4), C76(H76), C83(H83), C85(H85), C84(H84),
 C80(H80), C90(H90), C91(H91), C92(H92), C89(H89), C72(H72), C88(H88), C93(H93),
  C94(H94), C101(H101), C103(H103), C104(H104), C102(H102), C107(H107),
 C106(H106), C105(H105), C100(H100)
6.d Fitted hexagon refined as free rotating group:
 C74(C73,C77,C71,C4,C76), C79(C81,C83,C85,C84,C80), C87(C90,C91,C92,C89,C86),
 C72(C78,C82,C88,C93,C94), C98(C101,C103,C104,C102,C99), C96(C107,C106,C105,
 C100,C97)
6.e Idealised Me refined as rotating group:
 C58(H58A,H58B,H58C)
;
_atom_sites_solution_hydrogens     mixed
_atom_sites_solution_primary       dual
_atom_sites_solution_secondary     ?
loop_
  _atom_site_label
  _atom_site_type_symbol
  _atom_site_fract_x
  _atom_site_fract_y
  _atom_site_fract_z
  _atom_site_U_iso_or_equiv
  _atom_site_adp_type
  _atom_site_occupancy
  _atom_site_site_symmetry_order
  _atom_site_calc_flag
  _atom_site_refinement_flags_posn
  _atom_site_refinement_flags_adp
  _atom_site_refinement_flags_occupancy
  _atom_site_disorder_assembly
  _atom_site_disorder_group
 Co1 Co 1.000000 0.500000 0.500000 0.0175(3) Uani 1 2 d S . P . .
 Co2 Co 0.66414(6) 0.49882(6) 0.83382(2) 0.0176(2) Uani 1 1 d . . . . .
 S4 S 0.6967(6) 0.6511(10) 0.74608(14) 0.051(4) Uani 0.6 1 d D . P A 1
 S2 S 1.0363(8) 0.6744(5) 0.41595(15) 0.052(4) Uani 0.5 1 d D U P B 1
 O3 O 0.5384(3) 0.3183(3) 1.00231(11) 0.0360(11) Uani 1 1 d . . . . .
 N3 N 1.1987(3) 0.9496(3) 0.67513(10) 0.0204(10) Uani 1 1 d . . . . .
 O2 O 0.8108(3) 0.6734(3) 0.67119(12) 0.0411(12) Uani 1 1 d . . . . .
 N9 N 0.8641(3) 0.9530(3) 1.00916(10) 0.0199(10) Uani 1 1 d . . . . .
 N7 N 0.7264(3) 0.5957(3) 0.86587(10) 0.0221(10) Uani 1 1 d . . . . .
 N6 N 0.4721(3) 0.0454(3) 0.65784(10) 0.0203(10) Uani 1 1 d . . . C 1
 N10 N 1.0006(3) 0.5976(3) 0.46816(11) 0.0260(11) Uani 1 1 d . . . . .
 N5 N 0.5978(3) 0.2484(3) 0.71033(10) 0.0218(10) Uani 1 1 d . . . . .
 N8 N 0.7404(3) 0.7451(3) 0.95804(10) 0.0209(10) Uani 1 1 d . . . . .
 N4 N 0.6037(3) 0.4003(3) 0.80201(11) 0.0239(10) Uani 1 1 d . . . . .
 N1 N 1.0631(3) 0.5908(3) 0.53303(10) 0.0243(10) Uani 1 1 d . . . . .
 N2 N 1.0783(3) 0.7381(3) 0.62559(10) 0.0223(10) Uani 1 1 d . . . . .
 N11 N 0.6637(3) 0.5903(3) 0.80061(12) 0.0274(11) Uani 1 1 d . . . . .
 N12 N 0.6670(3) 0.4060(3) 0.86727(11) 0.0245(11) Uani 1 1 d . . . . .
 C43 C 0.6205(4) 0.6255(4) 0.97908(13) 0.0227(12) Uani 1 1 d . . . . .
 C47 C 0.8269(4) 0.8796(4) 0.99510(12) 0.0221(12) Uani 1 1 d . . . . .
 H47 H 0.857903 0.852318 0.980932 0.026 Uiso 1 1 calc R U . . .
 C42 C 0.6531(4) 0.6096(4) 0.95256(13) 0.0237(12) Uani 1 1 d . . . . .
 H42 H 0.635711 0.557455 0.941294 0.028 Uiso 1 1 calc R U . . .
 C22 C 0.7226(4) 0.3647(4) 0.69065(13) 0.0242(12) Uani 1 1 d . . . . .
 C40 C 0.7427(4) 0.6619(4) 0.91406(12) 0.0218(12) Uani 1 1 d . . . . .
 C23 C 0.6894(4) 0.3807(4) 0.71706(12) 0.0227(12) Uani 1 1 d . . . . .
 H23 H 0.708359 0.432020 0.728526 0.027 Uiso 1 1 calc R U . . .
 C44 C 0.6513(4) 0.7030(4) 0.99466(13) 0.0249(12) Uani 1 1 d . . . . .
 H44 H 0.631126 0.716119 1.012751 0.030 Uiso 1 1 calc R U . . .
 C24 C 0.6283(4) 0.3205(4) 0.72636(12) 0.0196(11) Uani 1 1 d . . . . .
 C9 C 0.9946(4) 0.6938(4) 0.66339(13) 0.0261(13) Uani 1 1 d . . . . .
 H9 H 0.976274 0.705893 0.681842 0.031 Uiso 1 1 calc R U . . .
 C8 C 0.9639(4) 0.6168(4) 0.64793(13) 0.0242(12) Uani 1 1 d . . . . .
 C25 C 0.5940(4) 0.3309(4) 0.75420(13) 0.0245(12) Uani 1 1 d . . . . .
 C75 C 1.0803(4) 0.6556(4) 0.58168(13) 0.0254(13) Uani 1 1 d . . . . .
 C5 C 1.0388(4) 0.5974(4) 0.56015(13) 0.0236(12) Uani 1 1 d . . . . .
 H5 H 0.991250 0.560616 0.564653 0.028 Uiso 1 1 calc R U . . .
 C6 C 1.0502(4) 0.6644(4) 0.61083(13) 0.0239(12) Uani 1 1 d . . . . .
 C31 C 0.6282(4) 0.2342(4) 0.68446(12) 0.0216(12) Uani 1 1 d . . . . .
 C32 C 0.5916(4) 0.1538(4) 0.66805(12) 0.0243(12) Uani 1 1 d . U . . .
 C18 C 0.8634(4) 0.3987(4) 0.66917(14) 0.0268(13) Uani 1 1 d . . . . .
 C7 C 0.9933(4) 0.6016(4) 0.62100(13) 0.0234(12) Uani 1 1 d . . . . .
 H7 H 0.974845 0.549600 0.609815 0.028 Uiso 1 1 calc R U . . .
 C41 C 0.7114(4) 0.6718(4) 0.94313(13) 0.0233(12) Uani 1 1 d . . . . .
 C33 C 0.5087(4) 0.1177(4) 0.67198(12) 0.0208(11) Uani 1 1 d . U . . .
 H33 H 0.476395 0.146258 0.685547 0.025 Uiso 1 1 calc R U . C 1
 C30 C 0.6907(4) 0.2893(4) 0.67438(13) 0.0252(12) Uani 1 1 d . . . . .
 H30 H 0.711766 0.275940 0.656459 0.030 Uiso 1 1 calc R U . . .
 C54 C 0.7007(4) 0.6052(4) 0.89253(12) 0.0223(12) Uani 1 1 d . . . . .
 H54 H 0.650962 0.571000 0.896717 0.027 Uiso 1 1 calc R U . . .
 C19 C 0.7864(4) 0.4268(4) 0.68042(13) 0.0258(13) Uani 1 1 d . . . . .
 C17 C 0.9200(4) 0.4610(4) 0.65916(14) 0.0270(13) Uani 1 1 d . . . . .
 H17 H 0.972601 0.440724 0.652087 0.032 Uiso 1 1 calc R U . . .
 C12 C 1.1647(4) 0.8749(4) 0.66214(12) 0.0217(12) Uani 1 1 d . . . . .
 H12 H 1.197061 0.847070 0.648439 0.026 Uiso 1 1 calc R U . . .
 C16 C 0.9018(4) 0.5528(4) 0.65920(14) 0.0262(13) Uani 1 1 d . . . . .
 C51 C 0.5583(4) 0.5625(4) 0.99004(13) 0.0253(13) Uani 1 1 d . . . . .
 C55 C 0.9653(5) 0.2780(5) 0.66476(17) 0.0368(16) Uani 1 1 d . . . . .
 H55A H 1.012021 0.299931 0.680632 0.044 Uiso 1 1 d R U . . .
 H55B H 0.978391 0.300151 0.645612 0.044 Uiso 1 1 d R U . . .
 C10 C 1.0516(4) 0.7530(4) 0.65206(12) 0.0202(11) Uani 1 1 d . . . . .
 C21 C 0.8264(4) 0.5811(4) 0.67105(15) 0.0284(13) Uani 1 1 d . . . . .
 C46 C 0.7464(4) 0.8415(4) 0.99998(12) 0.0234(12) Uani 1 1 d . . . . .
 C11 C 1.0849(4) 0.8347(4) 0.66725(13) 0.0246(12) Uani 1 1 d . . . . .
 C26 C 0.6301(4) 0.3920(4) 0.77568(12) 0.0205(11) Uani 1 1 d . . . . .
 H26 H 0.676547 0.430512 0.771315 0.025 Uiso 1 1 calc R U . . .
 C70 C 0.6644(4) 0.3868(4) 0.89135(13) 0.0253(13) Uani 1 1 d D . . . .
 C53 C 0.5220(4) 0.4084(4) 1.00085(14) 0.0263(13) Uani 1 1 d . . . . .
 C37 C 0.7960(5) 0.6442(5) 0.86053(15) 0.0340(15) Uani 1 1 d . . . . .
 H37 H 0.814584 0.639193 0.841800 0.041 Uiso 1 1 calc R U . . .
 C45 C 0.7103(4) 0.7604(4) 0.98400(13) 0.0236(12) Uani 1 1 d . . . . .
 C15 C 1.1528(4) 0.9896(4) 0.69469(14) 0.0266(13) Uani 1 1 d . . . . .
 H15 H 1.175839 1.043214 0.704067 0.032 Uiso 1 1 calc R U . . .
 C13 C 1.0391(4) 0.8766(5) 0.68799(15) 0.0336(15) Uani 1 1 d . . . . .
 H13 H 0.985150 0.851455 0.692714 0.040 Uiso 1 1 calc R U . . .
 C36 C 0.5194(4) 0.0045(4) 0.63864(14) 0.0268(13) Uani 1 1 d . U . . .
 H36 H 0.494121 -0.046620 0.628194 0.032 Uiso 1 1 calc R U . C 1
 C50 C 0.8186(4) 0.9906(4) 1.02906(14) 0.0258(13) Uani 1 1 d . . . . .
 H50 H 0.843295 1.042392 1.039205 0.031 Uiso 1 1 calc R U . . .
 C29 C 0.5388(5) 0.3459(5) 0.80788(15) 0.0334(15) Uani 1 1 d . . . . .
 H29 H 0.520350 0.349190 0.826670 0.040 Uiso 1 1 calc R U . . .
 C59 C 0.7194(5) 0.7027(5) 0.67023(16) 0.0357(15) Uani 1 1 d . . . . .
 H59A H 0.681463 0.678226 0.652584 0.043 Uiso 1 1 d R U . . .
 H59B H 0.696013 0.682156 0.688044 0.043 Uiso 1 1 d R U . . .
 C3 C 1.1505(5) 0.7078(5) 0.57489(15) 0.0359(16) Uani 1 1 d . . . . .
 H3 H 1.181283 0.747505 0.589081 0.043 Uiso 1 1 calc R U . . .
 C52 C 0.5785(4) 0.4706(4) 0.99092(13) 0.0269(13) Uani 1 1 d . . . . .
 H52 H 0.632233 0.450668 0.984536 0.032 Uiso 1 1 calc R U . . .
 C63 C 0.6266(4) 0.2879(5) 0.99994(16) 0.0348(15) Uani 1 1 d . . . . .
 H63A H 0.670430 0.314559 1.015783 0.042 Uiso 1 1 calc R U . . .
 H63B H 0.643050 0.306650 0.980854 0.042 Uiso 1 1 calc R U . . .
 C34 C 0.6386(4) 0.1104(4) 0.64850(15) 0.0319(15) Uani 1 1 d . U . . .
 H34 H 0.695373 0.132234 0.645091 0.038 Uiso 1 1 calc R U . . .
 C20 C 0.7698(4) 0.5201(4) 0.68089(14) 0.0281(13) Uani 1 1 d . . . . .
 H20 H 0.717869 0.541022 0.688240 0.034 Uiso 1 1 calc R U . . .
 C1 C 1.1316(5) 0.6426(5) 0.52757(16) 0.0368(16) Uani 1 1 d . . . . .
 H1 H 1.150466 0.637762 0.508873 0.044 Uiso 1 1 calc R U . . .
 C48 C 0.7022(4) 0.8821(5) 1.02075(14) 0.0318(15) Uani 1 1 d . . . . .
 H48 H 0.647129 0.858040 1.024933 0.038 Uiso 1 1 calc R U . . .
 C39 C 0.8163(5) 0.7099(5) 0.90784(15) 0.0371(16) Uani 1 1 d . . . . .
 H39 H 0.848247 0.748417 0.922196 0.045 Uiso 1 1 calc R U . . .
 C27 C 0.5245(5) 0.2753(5) 0.76117(15) 0.0388(18) Uani 1 1 d . . . . .
 H27 H 0.497113 0.232076 0.747554 0.047 Uiso 1 1 calc R U . . .
 C68 C 1.0139(4) 0.6313(5) 0.44667(15) 0.0319(14) Uani 1 1 d D . . . .
 C69 C 0.6756(4) 0.6187(4) 0.77789(14) 0.0281(13) Uani 1 1 d D . . . .
 C38 C 0.8426(5) 0.7014(5) 0.88086(15) 0.0429(19) Uani 1 1 d . . . . .
 H38 H 0.892448 0.734531 0.876176 0.052 Uiso 1 1 calc R U . . .
 C35 C 0.6010(5) 0.0340(5) 0.63387(16) 0.0382(16) Uani 1 1 d . U . . .
 H35 H 0.632732 0.002930 0.620652 0.046 Uiso 1 1 calc R U . . .
 C28 C 0.4975(5) 0.2853(6) 0.78803(17) 0.048(2) Uani 1 1 d . . . . .
 H28 H 0.449616 0.249729 0.792931 0.057 Uiso 1 1 calc R U . . .
 C14 C 1.0732(5) 0.9546(5) 0.70143(15) 0.0357(15) Uani 1 1 d . . . . .
 H14 H 1.042294 0.983962 0.715208 0.043 Uiso 1 1 calc R U . . .
 C64 C 0.6294(6) 0.1890(5) 1.0023(2) 0.053(2) Uani 1 1 d D . . . .
 H64A H 0.602869 0.169583 1.019633 0.063 Uiso 0.75 1 calc R U P D 1
 H64B H 0.692514 0.167975 1.004716 0.063 Uiso 0.75 1 calc R U P D 1
 H64C H 0.648584 0.179127 1.023559 0.063 Uiso 0.25 1 d R U P E 2
 H64D H 0.679274 0.173007 0.991499 0.063 Uiso 0.25 1 d R U P E 2
 C56 C 0.9633(5) 0.1766(5) 0.6648(2) 0.047(2) Uani 1 1 d . . . . .
 H56A H 0.938821 0.155701 0.682422 0.057 Uiso 1 1 calc R U . . .
 H56B H 1.025441 0.153592 0.666151 0.057 Uiso 1 1 calc R U . . .
 C60 C 0.7195(6) 0.8030(5) 0.6691(2) 0.049(2) Uani 1 1 d . . . . .
 H60A H 0.656580 0.824407 0.665428 0.059 Uiso 1 1 calc R U . . .
 H60B H 0.748969 0.822337 0.652306 0.059 Uiso 1 1 calc R U . . .
 C2 C 1.1755(5) 0.7014(6) 0.54706(16) 0.0436(19) Uani 1 1 d . . . . .
 H2 H 1.222534 0.737709 0.541868 0.052 Uiso 1 1 calc R U . . .
 C49 C 0.7385(5) 0.9579(5) 1.03546(16) 0.0385(17) Uani 1 1 d . . . . .
 H49 H 0.708572 0.986607 1.049629 0.046 Uiso 1 1 calc R U . . .
 C57 C 0.9055(7) 0.1375(6) 0.6371(2) 0.064(2) Uani 1 1 d . . . . .
 H57A H 0.842720 0.157928 0.636542 0.077 Uiso 1 1 calc R U . . .
 H57B H 0.927526 0.162332 0.619549 0.077 Uiso 1 1 calc R U . . .
 C61 C 0.7673(8) 0.8465(6) 0.6969(2) 0.068(3) Uani 1 1 d . . . . .
 H61A H 0.743264 0.821123 0.713925 0.082 Uiso 1 1 calc R U . . .
 H61B H 0.832062 0.831558 0.699081 0.082 Uiso 1 1 calc R U . . .
 C65 C 0.5755(8) 0.1481(7) 0.9739(3) 0.058(3) Uani 0.75 1 d D . P F 1
 H65A H 0.512431 0.168652 0.972565 0.070 Uiso 0.75 1 calc R U P F 1
 H65B H 0.599719 0.173670 0.956941 0.070 Uiso 0.75 1 calc R U P F 1
 C58 C 0.9059(11) 0.0386(8) 0.6351(3) 0.104(5) Uani 1 1 d . . . . .
 H58A H 0.868598 0.019701 0.616820 0.156 Uiso 1 1 calc R U . . .
 H58B H 0.881737 0.013131 0.651863 0.156 Uiso 1 1 calc R U . . .
 H58C H 0.967628 0.017472 0.635269 0.156 Uiso 1 1 calc R U . . .
 C62 C 0.7571(12) 0.9474(7) 0.6972(3) 0.111(5) Uani 1 1 d . . . . .
 H62A H 0.781474 0.972562 0.680924 0.166 Uiso 1 1 d R U . . .
 H62B H 0.694504 0.962432 0.695514 0.166 Uiso 1 1 d R U . . .
 H62C H 0.788674 0.971092 0.715204 0.166 Uiso 1 1 d R U . . .
 C66 C 0.5743(12) 0.0490(9) 0.9708(4) 0.129(6) Uani 1 1 d D . . . .
 H66D H 0.577903 0.079672 0.952701 0.194 Uiso 0.25 1 d R U P F 2
 H66E H 0.628453 0.015352 0.976561 0.194 Uiso 0.25 1 d R U P F 2
 H66F H 0.523843 0.008922 0.968081 0.194 Uiso 0.25 1 d R U P F 2
 H66A H 0.545993 0.020302 0.985611 0.194 Uiso 0.75 1 d R U P F 1
 H66B H 0.541333 0.035702 0.951751 0.194 Uiso 0.75 1 d R U P F 1
 H66C H 0.634793 0.027272 0.971851 0.194 Uiso 0.75 1 d R U P F 1
 S1 S 1.0183(16) 0.6462(14) 0.4118(3) 0.052(4) Uani 0.2 1 d D U P B .
 C67 C 0.5642(19) 0.1133(18) 0.9952(7) 0.058(3) Uani 0.25 1 d D . P F 2
 H67A H 0.503441 0.139993 0.990656 0.070 Uiso 0.25 1 calc R U P F 2
 H67B H 0.565222 0.077488 1.013279 0.070 Uiso 0.25 1 calc R U P F 2
 S6 S 0.6600(5) 0.3682(3) 0.92619(9) 0.0409(11) Uani 0.7 1 d D . P G 1
 S3 S 1.046(2) 0.6975(15) 0.4216(4) 0.052(4) Uani 0.3 1 d D U P B 3
 S5 S 0.6466(13) 0.3438(8) 0.9221(3) 0.0409(11) Uani 0.3 1 d D . P G 2
 O4 O 0.8788(3) 0.3080(3) 0.66954(11) 0.0363(11) Uani 1 1 d . . . . .
 S8 S 0.7100(16) 0.6822(12) 0.7533(3) 0.051(4) Uani 0.2 1 d D . P A 2
 S9 S 0.679(3) 0.636(4) 0.7435(5) 0.051(4) Uani 0.2 1 d D . P A 3
 Cl71 Cl 0.8063(3) 0.7052(3) 0.59524(8) 0.1298(17) Uani 1 1 d D . . H 1
 C74 C 0.6472(4) 0.7892(4) 0.58180(13) 0.067(3) Uani 1 1 d DG . . H 1
 C73 C 0.7398(4) 0.7940(4) 0.58272(14) 0.067(3) Uani 1 1 d DG . . H 1
 C77 C 0.7786(3) 0.8712(5) 0.57338(15) 0.082(3) Uani 1 1 d G . . H 1
 H77 H 0.841918 0.874517 0.574010 0.099 Uiso 1 1 calc R U . H 1
 C71 C 0.7248(5) 0.9436(4) 0.56310(14) 0.076(3) Uani 1 1 d G . . H 1
 H71 H 0.751331 0.996408 0.556709 0.092 Uiso 1 1 calc R U . H 1
 C4 C 0.6322(4) 0.9388(4) 0.56217(13) 0.071(3) Uani 1 1 d G . . H 1
 H4 H 0.595420 0.988302 0.555148 0.085 Uiso 1 1 calc R U . H 1
 C76 C 0.5934(3) 0.8616(5) 0.57152(12) 0.059(2) Uani 1 1 d G . . H 1
 H76 H 0.530095 0.858305 0.570886 0.071 Uiso 1 1 calc R U . H 1
 Cl4 Cl 0.5968(3) 0.6946(3) 0.59199(9) 0.1342(17) Uani 1 1 d D . . H 1
 Cl72 Cl 0.9458(3) 0.6850(2) 1.02291(10) 0.1143(13) Uani 1 1 d D . . . .
 C79 C 0.9291(6) 0.5720(4) 1.0234(2) 0.080(3) Uani 1 1 d DG . . . .
 C81 C 0.9697(5) 0.5181(6) 1.04623(16) 0.091(4) Uani 1 1 d DG . . . .
 C83 C 0.9512(7) 0.4269(6) 1.0461(2) 0.111(5) Uani 1 1 d G . . . .
 H83 H 0.978876 0.390036 1.061749 0.134 Uiso 1 1 calc R U . . .
 C85 C 0.8922(7) 0.3895(5) 1.0232(3) 0.145(8) Uani 1 1 d G . . . .
 H85 H 0.879521 0.327128 1.023152 0.174 Uiso 1 1 calc R U . . .
 C84 C 0.8516(5) 0.4434(8) 1.0004(2) 0.105(5) Uani 1 1 d G . . . .
 H84 H 0.811289 0.417815 0.984704 0.126 Uiso 1 1 calc R U . . .
 C80 C 0.8701(5) 0.5346(7) 1.00046(17) 0.095(4) Uani 1 1 d G . . . .
 H80 H 0.842411 0.571411 0.984853 0.114 Uiso 1 1 calc R U . . .
 Cl82 Cl 1.0425(3) 0.5642(4) 1.07489(10) 0.1387(17) Uani 1 1 d D . . . .
 Cl78 Cl 0.7750(6) 1.1410(8) 0.7523(2) 0.1148(15) Uani 0.5 1 d D . P I 1
 C87 C 0.9587(10) 1.1075(8) 0.7597(3) 0.081(2) Uani 0.5 1 d DG . P I 1
 C90 C 1.0457(8) 1.1366(9) 0.7583(3) 0.081(2) Uani 0.5 1 d G . P I 1
 H90 H 1.094995 1.097068 0.763460 0.097 Uiso 0.5 1 calc R U P I 1
 C91 C 1.0604(7) 1.2235(10) 0.7493(3) 0.081(2) Uani 0.5 1 d G . P I 1
 H91 H 1.119872 1.243442 0.748398 0.097 Uiso 0.5 1 calc R U P I 1
 C92 C 0.9882(10) 1.2814(8) 0.7418(3) 0.081(2) Uani 0.5 1 d G . P I 1
 H92 H 0.998343 1.340778 0.735669 0.097 Uiso 0.5 1 calc R U P I 1
 C89 C 0.9013(8) 1.2522(10) 0.7432(3) 0.081(2) Uani 0.5 1 d G . P I 1
 H89 H 0.851934 1.291740 0.737999 0.097 Uiso 0.5 1 calc R U P I 1
 C86 C 0.8865(7) 1.1653(11) 0.7521(3) 0.081(2) Uani 0.5 1 d DG . P I 1
 Cl88 Cl 0.9382(5) 1.0025(5) 0.7707(2) 0.1148(15) Uani 0.5 1 d D . P I 1
 C72 C 0.9262(9) 1.2343(9) 0.7492(3) 0.081(2) Uani 0.5 1 d G . P J 2
 H72 H 0.893582 1.287298 0.743175 0.097 Uiso 0.5 1 calc R U P J 2
 C78 C 0.8832(6) 1.1625(11) 0.7603(3) 0.081(2) Uani 0.5 1 d DG . P J 2
 C82 C 0.9309(10) 1.0849(9) 0.7690(3) 0.081(2) Uani 0.5 1 d DG . P J 2
 C88 C 1.0218(10) 1.0792(9) 0.7667(3) 0.081(2) Uani 0.5 1 d G . P J 2
 H88 H 1.054427 1.026210 0.772697 0.097 Uiso 0.5 1 calc R U P J 2
 C93 C 1.0648(6) 1.1511(11) 0.7556(3) 0.081(2) Uani 0.5 1 d G . P J 2
 H93 H 1.126913 1.147160 0.754033 0.097 Uiso 0.5 1 calc R U P J 2
 C94 C 1.0171(9) 1.2286(9) 0.7468(3) 0.081(2) Uani 0.5 1 d G . P J 2
 H94 H 1.046492 1.277705 0.739272 0.097 Uiso 0.5 1 calc R U P J 2
 Cl1 Cl 0.8845(5) 0.9890(6) 0.7813(2) 0.1148(15) Uani 0.5 1 d D . P J 2
 Cl2 Cl 0.7728(6) 1.1609(8) 0.7643(2) 0.1148(15) Uani 0.5 1 d D . P J 2
 Cl97 Cl 1.1643(5) 0.4249(5) 0.64527(18) 0.0937(19) Uiso 0.5 1 d D . P K 1
 C98 C 1.2223(13) 0.5179(10) 0.6429(4) 0.089(8) Uiso 0.5 1 d DG . P K 1
 C101 C 1.2369(12) 0.5737(11) 0.6673(3) 0.106(9) Uiso 0.5 1 d G . P K 1
 H101 H 1.207721 0.561857 0.683810 0.127 Uiso 0.5 1 calc R U P K 1
 C103 C 1.2943(11) 0.6468(10) 0.6677(3) 0.067(5) Uiso 0.5 1 d G . P K 1
 H103 H 1.304296 0.684881 0.684332 0.080 Uiso 0.5 1 calc R U P K 1
 C104 C 1.3371(10) 0.6641(9) 0.6436(4) 0.075(6) Uiso 0.5 1 d G . P K 1
 H104 H 1.376280 0.714024 0.643765 0.090 Uiso 0.5 1 calc R U P K 1
 C102 C 1.3225(12) 0.6083(12) 0.6191(3) 0.094(8) Uiso 0.5 1 d G . P K 1
 H102 H 1.351687 0.620143 0.602675 0.113 Uiso 0.5 1 calc R U P K 1
 C99 C 1.2651(13) 0.5352(10) 0.6188(3) 0.089(7) Uiso 0.5 1 d DG . P K 1
 Cl Cl 1.2747(7) 0.4476(7) 0.5826(2) 0.112(3) Uiso 0.5 1 d D . P L 2
 Cl3 Cl 1.1573(5) 0.4333(5) 0.62936(18) 0.0946(19) Uiso 0.5 1 d D . P L 2
 C96 C 1.2371(9) 0.5175(8) 0.6329(3) 0.049(4) Uiso 0.5 1 d DG . P L 2
 C107 C 1.2497(9) 0.5802(9) 0.6555(3) 0.082(7) Uiso 0.5 1 d G . P L 2
 H107 H 1.216097 0.575761 0.671321 0.099 Uiso 0.5 1 calc R U P L 2
 C106 C 1.3114(10) 0.6492(8) 0.6550(3) 0.056(4) Uiso 0.5 1 d G . P L 2
 H106 H 1.319926 0.692002 0.670387 0.068 Uiso 0.5 1 calc R U P L 2
 C105 C 1.3605(10) 0.6556(9) 0.6318(3) 0.087(7) Uiso 0.5 1 d G . P L 2
 H105 H 1.402652 0.702831 0.631457 0.104 Uiso 0.5 1 calc R U P L 2
 C100 C 1.3480(10) 0.5930(10) 0.6093(3) 0.081(6) Uiso 0.5 1 d G . P L 2
 H100 H 1.381550 0.597419 0.593462 0.097 Uiso 0.5 1 calc R U P L 2
 C97 C 1.2863(10) 0.5240(9) 0.6098(3) 0.073(6) Uiso 0.5 1 d DG . P L 2
 Cl5 Cl 1.2491(9) 0.4619(8) 0.5881(3) 0.142(4) Uiso 0.5 1 d D . P K 1

loop_
  _atom_site_aniso_label
  _atom_site_aniso_U_11
  _atom_site_aniso_U_22
  _atom_site_aniso_U_33
  _atom_site_aniso_U_23
  _atom_site_aniso_U_13
  _atom_site_aniso_U_12
 Co1 0.0218(7) 0.0124(6) 0.0186(6) 0.0011(5) 0.0047(5) 0.0013(5)
 Co2 0.0210(5) 0.0140(5) 0.0180(5) 0.0007(3) 0.0036(4) 0.0028(3)
 S4 0.063(6) 0.063(9) 0.032(2) 0.019(4) 0.020(4) 0.015(6)
 S2 0.052(5) 0.059(9) 0.049(4) 0.031(5) 0.025(5) 0.010(6)
 O3 0.036(3) 0.020(2) 0.059(3) 0.001(2) 0.028(2) -0.0025(19)
 N3 0.023(2) 0.020(2) 0.018(2) -0.0059(18) 0.0031(19) -0.0084(19)
 O2 0.040(3) 0.022(2) 0.068(3) -0.005(2) 0.031(3) -0.007(2)
 N9 0.023(2) 0.017(2) 0.021(2) -0.0026(18) 0.0063(19) -0.0045(19)
 N7 0.026(2) 0.021(2) 0.020(2) -0.0029(19) 0.0062(19) -0.002(2)
 N6 0.019(2) 0.019(2) 0.023(2) -0.0086(19) 0.0073(19) -0.0065(19)
 N10 0.023(2) 0.024(3) 0.031(3) -0.001(2) 0.005(2) 0.003(2)
 N5 0.024(2) 0.018(2) 0.023(2) -0.0030(19) 0.003(2) -0.0050(19)
 N8 0.019(2) 0.022(2) 0.022(2) -0.0076(19) 0.0041(19) -0.0086(19)
 N4 0.029(3) 0.018(2) 0.026(2) -0.004(2) 0.010(2) -0.004(2)
 N1 0.028(3) 0.025(3) 0.021(2) -0.004(2) 0.007(2) -0.002(2)
 N2 0.023(2) 0.022(2) 0.023(2) -0.006(2) 0.006(2) -0.009(2)
 N11 0.028(3) 0.022(3) 0.034(3) -0.001(2) 0.013(2) 0.007(2)
 N12 0.028(3) 0.021(2) 0.026(3) 0.003(2) 0.009(2) 0.007(2)
 C43 0.022(3) 0.024(3) 0.023(3) -0.004(2) 0.009(2) -0.010(2)
 C47 0.022(3) 0.022(3) 0.023(3) 0.004(2) 0.004(2) -0.002(2)
 C42 0.030(3) 0.018(3) 0.024(3) -0.002(2) 0.008(2) -0.009(2)
 C22 0.026(3) 0.020(3) 0.027(3) -0.002(2) 0.008(2) -0.007(2)
 C40 0.024(3) 0.019(3) 0.024(3) -0.005(2) 0.008(2) -0.007(2)
 C23 0.027(3) 0.023(3) 0.022(3) -0.005(2) 0.013(2) -0.007(2)
 C44 0.029(3) 0.021(3) 0.025(3) -0.005(2) 0.007(2) -0.008(2)
 C24 0.018(3) 0.019(3) 0.023(3) -0.004(2) 0.005(2) -0.005(2)
 C9 0.032(3) 0.024(3) 0.025(3) -0.003(2) 0.013(3) -0.011(3)
 C8 0.025(3) 0.021(3) 0.026(3) -0.008(2) 0.003(2) -0.007(2)
 C25 0.026(3) 0.025(3) 0.025(3) -0.002(2) 0.010(2) -0.007(2)
 C75 0.030(3) 0.024(3) 0.024(3) -0.003(2) 0.010(2) -0.006(2)
 C5 0.028(3) 0.021(3) 0.023(3) -0.007(2) 0.008(2) -0.006(2)
 C6 0.026(3) 0.018(3) 0.028(3) 0.000(2) 0.007(2) -0.004(2)
 C31 0.024(3) 0.023(3) 0.021(3) -0.005(2) 0.012(2) -0.007(2)
 C32 0.027(3) 0.026(3) 0.021(3) -0.003(2) 0.006(2) -0.009(2)
 C18 0.031(3) 0.018(3) 0.034(3) -0.006(2) 0.010(3) -0.005(2)
 C7 0.022(3) 0.024(3) 0.026(3) -0.008(2) 0.009(2) -0.008(2)
 C41 0.027(3) 0.021(3) 0.023(3) -0.008(2) 0.010(2) -0.005(2)
 C33 0.023(3) 0.020(3) 0.021(3) 0.000(2) 0.008(2) -0.005(2)
 C30 0.024(3) 0.024(3) 0.028(3) -0.006(2) 0.007(2) -0.005(2)
 C54 0.021(3) 0.023(3) 0.023(3) -0.005(2) 0.005(2) -0.003(2)
 C19 0.028(3) 0.026(3) 0.027(3) -0.005(2) 0.012(2) -0.004(2)
 C17 0.022(3) 0.023(3) 0.038(3) -0.001(3) 0.010(3) -0.002(2)
 C12 0.025(3) 0.020(3) 0.021(3) 0.002(2) 0.006(2) -0.006(2)
 C16 0.024(3) 0.022(3) 0.035(3) -0.006(3) 0.010(3) -0.010(2)
 C51 0.032(3) 0.020(3) 0.026(3) -0.006(2) 0.012(3) -0.010(2)
 C55 0.036(4) 0.034(4) 0.043(4) 0.000(3) 0.016(3) -0.003(3)
 C10 0.022(3) 0.021(3) 0.019(3) 0.000(2) 0.007(2) -0.001(2)
 C21 0.029(3) 0.015(3) 0.042(4) -0.003(3) 0.007(3) -0.003(2)
 C46 0.028(3) 0.023(3) 0.021(3) -0.002(2) 0.006(2) -0.006(2)
 C11 0.025(3) 0.023(3) 0.027(3) 0.000(2) 0.005(2) -0.002(2)
 C26 0.021(3) 0.021(3) 0.020(3) -0.006(2) 0.006(2) -0.004(2)
 C70 0.025(3) 0.023(3) 0.028(3) 0.005(2) 0.006(2) 0.006(2)
 C53 0.030(3) 0.020(3) 0.032(3) -0.003(2) 0.015(3) -0.008(2)
 C37 0.038(4) 0.037(4) 0.030(3) -0.008(3) 0.015(3) -0.012(3)
 C45 0.024(3) 0.025(3) 0.024(3) -0.007(2) 0.009(2) -0.007(2)
 C15 0.029(3) 0.025(3) 0.030(3) -0.006(2) 0.016(3) -0.007(2)
 C13 0.030(3) 0.039(4) 0.036(3) -0.017(3) 0.018(3) -0.013(3)
 C36 0.028(3) 0.027(3) 0.027(3) -0.011(2) 0.011(3) -0.012(2)
 C50 0.025(3) 0.023(3) 0.031(3) -0.008(2) 0.009(3) -0.009(2)
 C29 0.034(3) 0.035(4) 0.033(3) -0.009(3) 0.012(3) -0.011(3)
 C59 0.036(4) 0.037(4) 0.036(4) -0.001(3) 0.010(3) -0.002(3)
 C3 0.041(4) 0.037(4) 0.033(3) -0.011(3) 0.015(3) -0.021(3)
 C52 0.029(3) 0.024(3) 0.030(3) 0.000(3) 0.011(3) -0.008(3)
 C63 0.030(3) 0.038(4) 0.038(4) 0.001(3) 0.011(3) 0.001(3)
 C34 0.025(3) 0.035(4) 0.039(3) -0.018(3) 0.015(3) -0.019(3)
 C20 0.030(3) 0.019(3) 0.037(3) -0.010(3) 0.010(3) -0.009(2)
 C1 0.040(4) 0.038(4) 0.038(4) -0.011(3) 0.023(3) -0.014(3)
 C48 0.033(3) 0.036(4) 0.031(3) -0.014(3) 0.019(3) -0.017(3)
 C39 0.042(4) 0.041(4) 0.033(3) -0.015(3) 0.020(3) -0.025(3)
 C27 0.040(4) 0.049(4) 0.032(3) -0.019(3) 0.019(3) -0.033(3)
 C68 0.028(3) 0.037(4) 0.033(3) 0.011(3) 0.013(3) 0.010(3)
 C69 0.029(3) 0.029(3) 0.029(3) 0.013(3) 0.010(3) 0.010(3)
 C38 0.045(4) 0.056(5) 0.035(4) -0.023(3) 0.027(3) -0.028(4)
 C35 0.042(4) 0.031(4) 0.047(4) -0.016(3) 0.025(3) -0.015(3)
 C28 0.053(5) 0.057(5) 0.041(4) -0.016(4) 0.032(4) -0.030(4)
 C14 0.037(4) 0.036(4) 0.037(4) -0.013(3) 0.016(3) -0.007(3)
 C64 0.047(5) 0.038(4) 0.077(6) 0.010(4) 0.021(4) 0.004(4)
 C56 0.047(4) 0.029(4) 0.072(5) 0.009(4) 0.027(4) 0.004(3)
 C60 0.053(5) 0.036(4) 0.062(5) 0.006(4) 0.021(4) 0.010(4)
 C2 0.042(4) 0.058(5) 0.036(4) -0.014(3) 0.021(3) -0.029(4)
 C49 0.034(4) 0.046(4) 0.040(4) -0.022(3) 0.021(3) -0.015(3)
 C57 0.066(6) 0.047(5) 0.080(7) -0.006(5) 0.011(5) -0.001(4)
 C61 0.080(7) 0.041(5) 0.087(7) 0.009(5) 0.027(6) 0.008(5)
 C65 0.052(6) 0.038(6) 0.085(9) 0.001(5) 0.012(6) 0.007(5)
 C58 0.145(13) 0.051(7) 0.122(11) -0.005(7) 0.038(10) 0.000(7)
 C62 0.188(16) 0.040(6) 0.104(10) -0.014(6) 0.024(10) -0.005(8)
 C66 0.146(15) 0.076(9) 0.163(16) -0.032(10) 0.017(12) 0.009(9)
 S1 0.052(5) 0.059(9) 0.049(4) 0.031(5) 0.025(5) 0.010(6)
 C67 0.052(6) 0.038(6) 0.085(9) 0.001(5) 0.012(6) 0.007(5)
 S6 0.064(3) 0.034(3) 0.0270(16) 0.0072(15) 0.0144(17) 0.015(2)
 S3 0.052(5) 0.059(9) 0.049(4) 0.031(5) 0.025(5) 0.010(6)
 S5 0.064(3) 0.034(3) 0.0270(16) 0.0072(15) 0.0144(17) 0.015(2)
 O4 0.032(2) 0.024(2) 0.059(3) -0.005(2) 0.024(2) -0.0043(19)
 S8 0.063(6) 0.063(9) 0.032(2) 0.019(4) 0.020(4) 0.015(6)
 S9 0.063(6) 0.063(9) 0.032(2) 0.019(4) 0.020(4) 0.015(6)
 Cl71 0.145(3) 0.140(3) 0.089(2) -0.011(2) -0.029(2) 0.088(3)
 C74 0.083(7) 0.072(7) 0.040(5) -0.002(4) -0.005(5) 0.006(5)
 C73 0.071(6) 0.082(7) 0.046(5) -0.002(5) -0.004(4) 0.036(6)
 C77 0.068(7) 0.122(11) 0.056(6) -0.011(7) 0.007(5) 0.016(7)
 C71 0.074(7) 0.105(9) 0.046(5) -0.011(5) -0.004(5) 0.007(6)
 C4 0.091(8) 0.077(7) 0.042(5) -0.010(5) 0.000(5) 0.035(6)
 C76 0.061(5) 0.083(7) 0.029(4) -0.010(4) -0.005(4) 0.017(5)
 Cl4 0.158(4) 0.123(3) 0.105(3) 0.041(2) -0.036(2) -0.057(3)
 Cl72 0.112(3) 0.074(2) 0.162(4) 0.023(2) 0.036(3) 0.0097(18)
 C79 0.065(7) 0.073(7) 0.105(9) 0.006(7) 0.018(6) 0.005(6)
 C81 0.074(8) 0.104(10) 0.099(9) 0.000(8) 0.026(7) -0.014(7)
 C83 0.133(13) 0.078(9) 0.139(13) 0.019(9) 0.069(11) -0.005(9)
 C85 0.128(15) 0.103(13) 0.22(2) -0.068(15) 0.095(15) -0.051(11)
 C84 0.082(9) 0.108(12) 0.135(13) -0.029(10) 0.052(9) -0.027(8)
 C80 0.076(8) 0.113(11) 0.100(10) -0.002(8) 0.024(7) 0.017(8)
 Cl82 0.128(3) 0.176(5) 0.106(3) 0.006(3) 0.000(2) -0.043(3)
 Cl78 0.083(2) 0.127(3) 0.128(4) 0.010(3) -0.008(3) 0.024(2)
 C87 0.070(4) 0.117(6) 0.051(4) -0.028(4) -0.008(3) 0.012(4)
 C90 0.070(4) 0.117(6) 0.051(4) -0.028(4) -0.008(3) 0.012(4)
 C91 0.070(4) 0.117(6) 0.051(4) -0.028(4) -0.008(3) 0.012(4)
 C92 0.070(4) 0.117(6) 0.051(4) -0.028(4) -0.008(3) 0.012(4)
 C89 0.070(4) 0.117(6) 0.051(4) -0.028(4) -0.008(3) 0.012(4)
 C86 0.070(4) 0.117(6) 0.051(4) -0.028(4) -0.008(3) 0.012(4)
 Cl88 0.083(2) 0.127(3) 0.128(4) 0.010(3) -0.008(3) 0.024(2)
 C72 0.070(4) 0.117(6) 0.051(4) -0.028(4) -0.008(3) 0.012(4)
 C78 0.070(4) 0.117(6) 0.051(4) -0.028(4) -0.008(3) 0.012(4)
 C82 0.070(4) 0.117(6) 0.051(4) -0.028(4) -0.008(3) 0.012(4)
 C88 0.070(4) 0.117(6) 0.051(4) -0.028(4) -0.008(3) 0.012(4)
 C93 0.070(4) 0.117(6) 0.051(4) -0.028(4) -0.008(3) 0.012(4)
 C94 0.070(4) 0.117(6) 0.051(4) -0.028(4) -0.008(3) 0.012(4)
 Cl1 0.083(2) 0.127(3) 0.128(4) 0.010(3) -0.008(3) 0.024(2)
 Cl2 0.083(2) 0.127(3) 0.128(4) 0.010(3) -0.008(3) 0.024(2)

_geom_special_details
;
 All esds (except the esd in the dihedral angle between two l.s. planes)
 are estimated using the full covariance matrix.  The cell esds are taken
 into account individually in the estimation of esds in distances, angles
 and torsion angles; correlations between esds in cell parameters are only
 used when they are defined by crystal symmetry.  An approximate (isotropic)
 treatment of cell esds is used for estimating esds involving l.s. planes.
;
loop_
  _geom_bond_atom_site_label_1
  _geom_bond_atom_site_label_2
  _geom_bond_distance
  _geom_bond_site_symmetry_2
  _geom_bond_publ_flag
 Co1 N9 2.262(5) 4_575 ?
 Co1 N9 2.262(5) 2_746 ?
 Co1 N10 2.069(5) 3_766 ?
 Co1 N10 2.069(5) . ?
 Co1 N1 2.149(5) . ?
 Co1 N1 2.149(5) 3_766 ?
 Co2 N3 2.288(5) 2_746 ?
 Co2 N7 2.175(5) . ?
 Co2 N6 2.253(5) 2_656 ?
 Co2 N4 2.176(5) . ?
 Co2 N11 2.051(5) . ?
 Co2 N12 2.069(5) . ?
 S4 C69 1.621(8) . ?
 S2 C68 1.637(9) . ?
 S2 S1 0.522(17) . ?
 O3 C53 1.367(8) . ?
 O3 C63 1.424(8) . ?
 N3 C12 1.330(7) . ?
 N3 C15 1.355(7) . ?
 O2 C21 1.397(8) . ?
 O2 C59 1.437(8) . ?
 N9 C47 1.350(7) . ?
 N9 C50 1.347(8) . ?
 N7 C54 1.350(7) . ?
 N7 C37 1.327(8) . ?
 N6 C33 1.336(7) . ?
 N6 C36 1.361(7) . ?
 N10 C68 1.155(8) . ?
 N5 C24 1.346(7) . ?
 N5 C31 1.357(7) . ?
 N8 C41 1.330(7) . ?
 N8 C45 1.361(7) . ?
 N4 C26 1.339(7) . ?
 N4 C29 1.330(8) . ?
 N1 C5 1.358(7) . ?
 N1 C1 1.344(8) . ?
 N2 C6 1.329(7) . ?
 N2 C10 1.360(7) . ?
 N11 C69 1.168(8) . ?
 N12 C70 1.153(8) . ?
 C43 C42 1.405(8) . ?
 C43 C44 1.403(8) . ?
 C43 C51 1.470(8) . ?
 C47 H47 0.9500 . ?
 C47 C46 1.389(8) . ?
 C42 H42 0.9500 . ?
 C42 C41 1.392(8) . ?
 C22 C23 1.405(8) . ?
 C22 C30 1.397(8) . ?
 C22 C19 1.464(8) . ?
 C40 C41 1.494(8) . ?
 C40 C54 1.382(8) . ?
 C40 C39 1.386(8) . ?
 C23 H23 0.9500 . ?
 C23 C24 1.398(8) . ?
 C44 H44 0.9500 . ?
 C44 C45 1.378(8) . ?
 C24 C25 1.463(8) . ?
 C9 H9 0.9500 . ?
 C9 C8 1.394(8) . ?
 C9 C10 1.388(8) . ?
 C8 C7 1.398(8) . ?
 C8 C16 1.485(8) . ?
 C25 C26 1.395(8) . ?
 C25 C27 1.409(8) . ?
 C75 C5 1.394(8) . ?
 C75 C6 1.488(8) . ?
 C75 C3 1.386(9) . ?
 C5 H5 0.9500 . ?
 C6 C7 1.398(8) . ?
 C31 C32 1.479(8) . ?
 C31 C30 1.382(8) . ?
 C32 C33 1.396(8) . ?
 C32 C34 1.388(9) . ?
 C18 C19 1.403(8) . ?
 C18 C17 1.388(8) . ?
 C18 O4 1.374(7) . ?
 C7 H7 0.9500 . ?
 C33 H33 0.9500 . ?
 C30 H30 0.9500 . ?
 C54 H54 0.9500 . ?
 C19 C20 1.416(9) . ?
 C17 H17 0.9500 . ?
 C17 C16 1.397(9) . ?
 C12 H12 0.9500 . ?
 C12 C11 1.395(8) . ?
 C16 C21 1.398(9) . ?
 C51 C53 1.408(9) 3_667 ?
 C51 C52 1.405(9) . ?
 C55 H55A 0.9900 . ?
 C55 H55B 0.9900 . ?
 C55 C56 1.514(10) . ?
 C55 O4 1.426(8) . ?
 C10 C11 1.458(8) . ?
 C21 C20 1.371(9) . ?
 C46 C45 1.476(8) . ?
 C46 C48 1.385(8) . ?
 C11 C13 1.407(8) . ?
 C26 H26 0.9500 . ?
 C70 S6 1.641(7) . ?
 C70 S5 1.616(13) . ?
 C53 C52 1.383(8) . ?
 C37 H37 0.9500 . ?
 C37 C38 1.379(9) . ?
 C15 H15 0.9500 . ?
 C15 C14 1.384(9) . ?
 C13 H13 0.9500 . ?
 C13 C14 1.379(9) . ?
 C36 H36 0.9500 . ?
 C36 C35 1.355(9) . ?
 C50 H50 0.9500 . ?
 C50 C49 1.374(9) . ?
 C29 H29 0.9500 . ?
 C29 C28 1.367(10) . ?
 C59 H59A 0.9903 . ?
 C59 H59B 0.9900 . ?
 C59 C60 1.498(10) . ?
 C3 H3 0.9500 . ?
 C3 C2 1.394(9) . ?
 C52 H52 0.9500 . ?
 C63 H63A 0.9900 . ?
 C63 H63B 0.9900 . ?
 C63 C64 1.480(10) . ?
 C34 H34 0.9500 . ?
 C34 C35 1.400(9) . ?
 C20 H20 0.9500 . ?
 C1 H1 0.9500 . ?
 C1 C2 1.354(10) . ?
 C48 H48 0.9500 . ?
 C48 C49 1.388(9) . ?
 C39 H39 0.9500 . ?
 C39 C38 1.367(9) . ?
 C27 H27 0.9500 . ?
 C27 C28 1.369(9) . ?
 C68 S1 1.634(15) . ?
 C68 S3 1.646(14) . ?
 C69 S8 1.623(16) . ?
 C69 S9 1.616(17) . ?
 C38 H38 0.9500 . ?
 C35 H35 0.9500 . ?
 C28 H28 0.9500 . ?
 C14 H14 0.9500 . ?
 C64 H64A 0.9900 . ?
 C64 H64B 0.9900 . ?
 C64 H64C 0.9901 . ?
 C64 H64D 0.9901 . ?
 C64 C65 1.555(15) . ?
 C64 C67 1.50(2) . ?
 C56 H56A 0.9900 . ?
 C56 H56B 0.9900 . ?
 C56 C57 1.548(13) . ?
 C60 H60A 0.9900 . ?
 C60 H60B 0.9900 . ?
 C60 C61 1.517(14) . ?
 C2 H2 0.9500 . ?
 C49 H49 0.9500 . ?
 C57 H57A 0.9900 . ?
 C57 H57B 0.9900 . ?
 C57 C58 1.479(14) . ?
 C61 H61A 0.9900 . ?
 C61 H61B 0.9900 . ?
 C61 C62 1.514(14) . ?
 C65 H65A 0.9900 . ?
 C65 H65B 0.9900 . ?
 C65 C66 1.487(17) . ?
 C58 H58A 0.9800 . ?
 C58 H58B 0.9800 . ?
 C58 H58C 0.9800 . ?
 C62 H62A 0.9595 . ?
 C62 H62B 0.9600 . ?
 C62 H62C 0.9602 . ?
 C66 H66D 0.9588 . ?
 C66 H66E 0.9595 . ?
 C66 H66F 0.9603 . ?
 C66 H66A 0.9606 . ?
 C66 H66B 0.9601 . ?
 C66 H66C 0.9600 . ?
 C66 C67 1.50(2) . ?
 S1 S3 0.95(4) . ?
 C67 H67A 0.9900 . ?
 C67 H67B 0.9900 . ?
 Cl71 C73 1.707(5) . ?
 C74 C73 1.3900 . ?
 C74 C76 1.3900 . ?
 C74 Cl4 1.703(6) . ?
 C73 C77 1.3900 . ?
 C77 H77 0.9500 . ?
 C77 C71 1.3900 . ?
 C71 H71 0.9500 . ?
 C71 C4 1.3900 . ?
 C4 H4 0.9500 . ?
 C4 C76 1.3900 . ?
 C76 H76 0.9500 . ?
 Cl72 C79 1.706(7) . ?
 C79 C81 1.3900 . ?
 C79 C80 1.3900 . ?
 C81 C83 1.3900 . ?
 C81 Cl82 1.726(7) . ?
 C83 H83 0.9500 . ?
 C83 C85 1.3900 . ?
 C85 H85 0.9500 . ?
 C85 C84 1.3900 . ?
 C84 H84 0.9500 . ?
 C84 C80 1.3900 . ?
 C80 H80 0.9500 . ?
 Cl78 C86 1.718(11) . ?
 C87 C90 1.3900 . ?
 C87 C86 1.3900 . ?
 C87 Cl88 1.690(11) . ?
 C90 H90 0.9500 . ?
 C90 C91 1.3900 . ?
 C91 H91 0.9500 . ?
 C91 C92 1.3900 . ?
 C92 H92 0.9500 . ?
 C92 C89 1.3900 . ?
 C89 H89 0.9500 . ?
 C89 C86 1.3900 . ?
 C72 H72 0.9500 . ?
 C72 C78 1.3900 . ?
 C72 C94 1.3900 . ?
 C78 C82 1.3900 . ?
 C78 Cl2 1.700(11) . ?
 C82 C88 1.3900 . ?
 C82 Cl1 1.726(11) . ?
 C88 H88 0.9500 . ?
 C88 C93 1.3900 . ?
 C93 H93 0.9500 . ?
 C93 C94 1.3900 . ?
 C94 H94 0.9500 . ?
 Cl97 C98 1.653(10) . ?
 C98 C101 1.3900 . ?
 C98 C99 1.3900 . ?
 C101 H101 0.9500 . ?
 C101 C103 1.3900 . ?
 C103 H103 0.9500 . ?
 C103 C104 1.3900 . ?
 C104 H104 0.9500 . ?
 C104 C102 1.3900 . ?
 C102 H102 0.9500 . ?
 C102 C99 1.3900 . ?
 C99 Cl5 1.777(12) . ?
 Cl C97 1.686(11) . ?
 Cl3 C96 1.730(9) . ?
 C96 C107 1.3900 . ?
 C96 C97 1.3900 . ?
 C107 H107 0.9500 . ?
 C107 C106 1.3900 . ?
 C106 H106 0.9500 . ?
 C106 C105 1.3900 . ?
 C105 H105 0.9500 . ?
 C105 C100 1.3900 . ?
 C100 H100 0.9500 . ?
 C100 C97 1.3900 . ?

loop_
  _geom_angle_atom_site_label_1
  _geom_angle_atom_site_label_2
  _geom_angle_atom_site_label_3
  _geom_angle
  _geom_angle_site_symmetry_1
  _geom_angle_site_symmetry_3
  _geom_angle_publ_flag
 N9 Co1 N9 180.0(2) 4_575 2_746 ?
 N10 Co1 N9 89.12(18) . 2_746 ?
 N10 Co1 N9 89.12(18) 3_766 4_575 ?
 N10 Co1 N9 90.88(18) . 4_575 ?
 N10 Co1 N9 90.88(18) 3_766 2_746 ?
 N10 Co1 N10 180.0 3_766 . ?
 N10 Co1 N1 90.5(2) . . ?
 N10 Co1 N1 89.5(2) . 3_766 ?
 N10 Co1 N1 89.5(2) 3_766 . ?
 N10 Co1 N1 90.5(2) 3_766 3_766 ?
 N1 Co1 N9 89.25(18) 3_766 2_746 ?
 N1 Co1 N9 89.25(18) . 4_575 ?
 N1 Co1 N9 90.75(18) 3_766 4_575 ?
 N1 Co1 N9 90.75(18) . 2_746 ?
 N1 Co1 N1 180.0(4) . 3_766 ?
 N7 Co2 N3 91.64(18) . 2_746 ?
 N7 Co2 N6 89.33(18) . 2_656 ?
 N7 Co2 N4 179.05(19) . . ?
 N6 Co2 N3 179.03(18) 2_656 2_746 ?
 N4 Co2 N3 87.60(18) . 2_746 ?
 N4 Co2 N6 91.43(19) . 2_656 ?
 N11 Co2 N3 88.83(18) . 2_746 ?
 N11 Co2 N7 90.9(2) . . ?
 N11 Co2 N6 91.28(18) . 2_656 ?
 N11 Co2 N4 89.6(2) . . ?
 N11 Co2 N12 178.9(2) . . ?
 N12 Co2 N3 90.13(18) . 2_746 ?
 N12 Co2 N7 88.9(2) . . ?
 N12 Co2 N6 89.76(18) . 2_656 ?
 N12 Co2 N4 90.5(2) . . ?
 S1 S2 C68 80.5(17) . . ?
 C53 O3 C63 118.2(5) . . ?
 C12 N3 Co2 118.9(4) . 2_756 ?
 C12 N3 C15 117.9(5) . . ?
 C15 N3 Co2 123.0(4) . 2_756 ?
 C21 O2 C59 117.4(5) . . ?
 C47 N9 Co1 118.8(4) . 2_756 ?
 C50 N9 Co1 124.4(4) . 2_756 ?
 C50 N9 C47 116.6(5) . . ?
 C54 N7 Co2 122.3(4) . . ?
 C37 N7 Co2 120.5(4) . . ?
 C37 N7 C54 117.1(5) . . ?
 C33 N6 Co2 119.0(4) . 2_646 ?
 C33 N6 C36 117.5(5) . . ?
 C36 N6 Co2 123.5(4) . 2_646 ?
 C68 N10 Co1 159.1(5) . . ?
 C24 N5 C31 118.4(5) . . ?
 C41 N8 C45 117.8(5) . . ?
 C26 N4 Co2 121.5(4) . . ?
 C29 N4 Co2 121.4(4) . . ?
 C29 N4 C26 117.1(5) . . ?
 C5 N1 Co1 123.1(4) . . ?
 C1 N1 Co1 120.0(4) . . ?
 C1 N1 C5 116.9(5) . . ?
 C6 N2 C10 118.7(5) . . ?
 C69 N11 Co2 158.0(5) . . ?
 C70 N12 Co2 152.1(5) . . ?
 C42 C43 C51 121.0(5) . . ?
 C44 C43 C42 117.0(5) . . ?
 C44 C43 C51 122.0(5) . . ?
 N9 C47 H47 117.9 . . ?
 N9 C47 C46 124.3(5) . . ?
 C46 C47 H47 117.9 . . ?
 C43 C42 H42 120.7 . . ?
 C41 C42 C43 118.6(5) . . ?
 C41 C42 H42 120.7 . . ?
 C23 C22 C19 120.6(5) . . ?
 C30 C22 C23 117.6(5) . . ?
 C30 C22 C19 121.8(5) . . ?
 C54 C40 C41 122.2(5) . . ?
 C54 C40 C39 117.5(5) . . ?
 C39 C40 C41 120.4(5) . . ?
 C22 C23 H23 120.2 . . ?
 C24 C23 C22 119.6(5) . . ?
 C24 C23 H23 120.2 . . ?
 C43 C44 H44 119.6 . . ?
 C45 C44 C43 120.7(5) . . ?
 C45 C44 H44 119.6 . . ?
 N5 C24 C23 122.0(5) . . ?
 N5 C24 C25 115.4(5) . . ?
 C23 C24 C25 122.5(5) . . ?
 C8 C9 H9 119.7 . . ?
 C10 C9 H9 119.7 . . ?
 C10 C9 C8 120.5(5) . . ?
 C9 C8 C7 117.6(5) . . ?
 C9 C8 C16 121.9(5) . . ?
 C7 C8 C16 120.5(5) . . ?
 C26 C25 C24 122.7(5) . . ?
 C26 C25 C27 116.5(5) . . ?
 C27 C25 C24 120.7(5) . . ?
 C5 C75 C6 122.2(5) . . ?
 C3 C75 C5 117.7(5) . . ?
 C3 C75 C6 120.1(5) . . ?
 N1 C5 C75 123.1(5) . . ?
 N1 C5 H5 118.4 . . ?
 C75 C5 H5 118.4 . . ?
 N2 C6 C75 114.7(5) . . ?
 N2 C6 C7 123.2(5) . . ?
 C7 C6 C75 122.1(5) . . ?
 N5 C31 C32 115.3(5) . . ?
 N5 C31 C30 122.7(5) . . ?
 C30 C31 C32 122.0(5) . . ?
 C33 C32 C31 121.2(5) . . ?
 C34 C32 C31 121.6(5) . . ?
 C34 C32 C33 117.2(5) . . ?
 C17 C18 C19 120.4(6) . . ?
 O4 C18 C19 116.0(5) . . ?
 O4 C18 C17 123.6(6) . . ?
 C8 C7 H7 120.6 . . ?
 C6 C7 C8 118.8(5) . . ?
 C6 C7 H7 120.6 . . ?
 N8 C41 C42 124.1(5) . . ?
 N8 C41 C40 114.9(5) . . ?
 C42 C41 C40 120.9(5) . . ?
 N6 C33 C32 124.0(5) . . ?
 N6 C33 H33 118.0 . . ?
 C32 C33 H33 118.0 . . ?
 C22 C30 H30 120.2 . . ?
 C31 C30 C22 119.7(5) . . ?
 C31 C30 H30 120.2 . . ?
 N7 C54 C40 123.7(5) . . ?
 N7 C54 H54 118.2 . . ?
 C40 C54 H54 118.2 . . ?
 C18 C19 C22 123.3(6) . . ?
 C18 C19 C20 117.2(5) . . ?
 C20 C19 C22 119.4(5) . . ?
 C18 C17 H17 119.1 . . ?
 C18 C17 C16 121.7(6) . . ?
 C16 C17 H17 119.1 . . ?
 N3 C12 H12 117.7 . . ?
 N3 C12 C11 124.5(5) . . ?
 C11 C12 H12 117.7 . . ?
 C17 C16 C8 119.8(5) . . ?
 C17 C16 C21 117.9(5) . . ?
 C21 C16 C8 122.3(6) . . ?
 C53 C51 C43 121.7(6) 3_667 . ?
 C52 C51 C43 119.3(6) . . ?
 C52 C51 C53 119.0(5) . 3_667 ?
 H55A C55 H55B 109.5 . . ?
 C56 C55 H55A 110.0 . . ?
 C56 C55 H55B 110.1 . . ?
 O4 C55 H55A 110.1 . . ?
 O4 C55 H55B 110.0 . . ?
 O4 C55 C56 107.1(6) . . ?
 N2 C10 C9 121.2(5) . . ?
 N2 C10 C11 116.1(5) . . ?
 C9 C10 C11 122.6(5) . . ?
 O2 C21 C16 116.6(5) . . ?
 C20 C21 O2 122.7(6) . . ?
 C20 C21 C16 120.7(6) . . ?
 C47 C46 C45 121.3(5) . . ?
 C48 C46 C47 117.0(5) . . ?
 C48 C46 C45 121.7(5) . . ?
 C12 C11 C10 121.4(5) . . ?
 C12 C11 C13 116.5(6) . . ?
 C13 C11 C10 122.1(5) . . ?
 N4 C26 C25 124.5(5) . . ?
 N4 C26 H26 117.7 . . ?
 C25 C26 H26 117.7 . . ?
 N12 C70 S6 175.4(6) . . ?
 N12 C70 S5 168.0(8) . . ?
 O3 C53 C51 116.4(5) . 3_667 ?
 O3 C53 C52 124.2(6) . . ?
 C52 C53 C51 119.4(6) . 3_667 ?
 N7 C37 H37 118.4 . . ?
 N7 C37 C38 123.1(6) . . ?
 C38 C37 H37 118.4 . . ?
 N8 C45 C44 121.8(5) . . ?
 N8 C45 C46 115.5(5) . . ?
 C44 C45 C46 122.7(5) . . ?
 N3 C15 H15 119.0 . . ?
 N3 C15 C14 121.9(6) . . ?
 C14 C15 H15 119.0 . . ?
 C11 C13 H13 120.2 . . ?
 C14 C13 C11 119.5(6) . . ?
 C14 C13 H13 120.2 . . ?
 N6 C36 H36 118.8 . . ?
 C35 C36 N6 122.4(5) . . ?
 C35 C36 H36 118.8 . . ?
 N9 C50 H50 118.2 . . ?
 N9 C50 C49 123.5(6) . . ?
 C49 C50 H50 118.2 . . ?
 N4 C29 H29 118.6 . . ?
 N4 C29 C28 122.8(6) . . ?
 C28 C29 H29 118.6 . . ?
 O2 C59 H59A 110.1 . . ?
 O2 C59 H59B 109.9 . . ?
 O2 C59 C60 107.4(6) . . ?
 H59A C59 H59B 109.5 . . ?
 C60 C59 H59A 110.0 . . ?
 C60 C59 H59B 110.0 . . ?
 C75 C3 H3 120.3 . . ?
 C75 C3 C2 119.4(6) . . ?
 C2 C3 H3 120.3 . . ?
 C51 C52 H52 119.2 . . ?
 C53 C52 C51 121.7(6) . . ?
 C53 C52 H52 119.2 . . ?
 O3 C63 H63A 109.8 . . ?
 O3 C63 H63B 109.8 . . ?
 O3 C63 C64 109.2(6) . . ?
 H63A C63 H63B 108.3 . . ?
 C64 C63 H63A 109.8 . . ?
 C64 C63 H63B 109.8 . . ?
 C32 C34 H34 120.5 . . ?
 C32 C34 C35 119.0(6) . . ?
 C35 C34 H34 120.5 . . ?
 C19 C20 H20 119.1 . . ?
 C21 C20 C19 121.8(6) . . ?
 C21 C20 H20 119.1 . . ?
 N1 C1 H1 118.0 . . ?
 N1 C1 C2 124.1(6) . . ?
 C2 C1 H1 118.0 . . ?
 C46 C48 H48 120.0 . . ?
 C46 C48 C49 120.0(6) . . ?
 C49 C48 H48 120.0 . . ?
 C40 C39 H39 120.3 . . ?
 C38 C39 C40 119.4(6) . . ?
 C38 C39 H39 120.3 . . ?
 C25 C27 H27 120.8 . . ?
 C28 C27 C25 118.4(6) . . ?
 C28 C27 H27 120.8 . . ?
 N10 C68 S2 176.9(7) . . ?
 N10 C68 S1 160.3(10) . . ?
 N10 C68 S3 165.9(11) . . ?
 S1 C68 S2 18.3(6) . . ?
 S1 C68 S3 33.7(13) . . ?
 N11 C69 S4 175.5(8) . . ?
 N11 C69 S8 161.3(9) . . ?
 N11 C69 S9 166(2) . . ?
 C37 C38 H38 120.4 . . ?
 C39 C38 C37 119.2(6) . . ?
 C39 C38 H38 120.4 . . ?
 C36 C35 C34 119.8(6) . . ?
 C36 C35 H35 120.1 . . ?
 C34 C35 H35 120.1 . . ?
 C29 C28 C27 120.7(6) . . ?
 C29 C28 H28 119.7 . . ?
 C27 C28 H28 119.7 . . ?
 C15 C14 H14 120.2 . . ?
 C13 C14 C15 119.6(6) . . ?
 C13 C14 H14 120.2 . . ?
 C63 C64 H64A 109.9 . . ?
 C63 C64 H64B 109.9 . . ?
 C63 C64 H64C 102.8 . . ?
 C63 C64 H64D 102.6 . . ?
 C63 C64 C65 108.9(7) . . ?
 C63 C64 C67 136.4(16) . . ?
 H64A C64 H64B 108.3 . . ?
 H64C C64 H64D 109.4 . . ?
 C65 C64 H64A 109.9 . . ?
 C65 C64 H64B 109.9 . . ?
 C67 C64 H64C 100.8 . . ?
 C67 C64 H64D 103.2 . . ?
 C55 C56 H56A 109.1 . . ?
 C55 C56 H56B 109.1 . . ?
 C55 C56 C57 112.6(7) . . ?
 H56A C56 H56B 107.8 . . ?
 C57 C56 H56A 109.1 . . ?
 C57 C56 H56B 109.1 . . ?
 C59 C60 H60A 108.8 . . ?
 C59 C60 H60B 108.8 . . ?
 C59 C60 C61 113.6(7) . . ?
 H60A C60 H60B 107.7 . . ?
 C61 C60 H60A 108.8 . . ?
 C61 C60 H60B 108.8 . . ?
 C3 C2 H2 120.6 . . ?
 C1 C2 C3 118.8(6) . . ?
 C1 C2 H2 120.6 . . ?
 C50 C49 C48 118.5(6) . . ?
 C50 C49 H49 120.7 . . ?
 C48 C49 H49 120.7 . . ?
 C56 C57 H57A 108.6 . . ?
 C56 C57 H57B 108.6 . . ?
 H57A C57 H57B 107.5 . . ?
 C58 C57 C56 114.8(10) . . ?
 C58 C57 H57A 108.6 . . ?
 C58 C57 H57B 108.6 . . ?
 C60 C61 H61A 108.9 . . ?
 C60 C61 H61B 108.9 . . ?
 H61A C61 H61B 107.7 . . ?
 C62 C61 C60 113.5(10) . . ?
 C62 C61 H61A 108.9 . . ?
 C62 C61 H61B 108.9 . . ?
 C64 C65 H65A 107.8 . . ?
 C64 C65 H65B 107.8 . . ?
 H65A C65 H65B 107.1 . . ?
 C66 C65 C64 118.1(11) . . ?
 C66 C65 H65A 107.8 . . ?
 C66 C65 H65B 107.8 . . ?
 C57 C58 H58A 109.5 . . ?
 C57 C58 H58B 109.5 . . ?
 C57 C58 H58C 109.5 . . ?
 H58A C58 H58B 109.5 . . ?
 H58A C58 H58C 109.5 . . ?
 H58B C58 H58C 109.5 . . ?
 C61 C62 H62A 109.3 . . ?
 C61 C62 H62B 109.4 . . ?
 C61 C62 H62C 109.7 . . ?
 H62A C62 H62B 109.5 . . ?
 H62A C62 H62C 109.5 . . ?
 H62B C62 H62C 109.5 . . ?
 C65 C66 H66A 111.9 . . ?
 C65 C66 H66B 107.0 . . ?
 C65 C66 H66C 109.5 . . ?
 H66D C66 H66E 109.6 . . ?
 H66D C66 H66F 109.5 . . ?
 H66E C66 H66F 109.4 . . ?
 H66A C66 H66B 109.5 . . ?
 H66A C66 H66C 109.4 . . ?
 H66B C66 H66C 109.5 . . ?
 C67 C66 H66D 111.7 . . ?
 C67 C66 H66E 107.7 . . ?
 C67 C66 H66F 109.0 . . ?
 S2 S1 C68 81.1(19) . . ?
 S3 S1 C68 73.8(13) . . ?
 C64 C67 C66 120.5(17) . . ?
 C64 C67 H67A 107.2 . . ?
 C64 C67 H67B 107.2 . . ?
 C66 C67 H67A 107.2 . . ?
 C66 C67 H67B 107.2 . . ?
 H67A C67 H67B 106.8 . . ?
 S1 S3 C68 72.5(12) . . ?
 C18 O4 C55 117.7(5) . . ?
 C73 C74 C76 120.0 . . ?
 C73 C74 Cl4 121.4(5) . . ?
 C76 C74 Cl4 118.5(5) . . ?
 C74 C73 Cl71 120.2(5) . . ?
 C77 C73 Cl71 119.8(5) . . ?
 C77 C73 C74 120.0 . . ?
 C73 C77 H77 120.0 . . ?
 C73 C77 C71 120.0 . . ?
 C71 C77 H77 120.0 . . ?
 C77 C71 H71 120.0 . . ?
 C4 C71 C77 120.0 . . ?
 C4 C71 H71 120.0 . . ?
 C71 C4 H4 120.0 . . ?
 C76 C4 C71 120.0 . . ?
 C76 C4 H4 120.0 . . ?
 C74 C76 H76 120.0 . . ?
 C4 C76 C74 120.0 . . ?
 C4 C76 H76 120.0 . . ?
 C81 C79 Cl72 122.2(6) . . ?
 C81 C79 C80 120.0 . . ?
 C80 C79 Cl72 117.7(6) . . ?
 C79 C81 C83 120.0 . . ?
 C79 C81 Cl82 120.2(7) . . ?
 C83 C81 Cl82 119.7(7) . . ?
 C81 C83 H83 120.0 . . ?
 C85 C83 C81 120.0 . . ?
 C85 C83 H83 120.0 . . ?
 C83 C85 H85 120.0 . . ?
 C83 C85 C84 120.0 . . ?
 C84 C85 H85 120.0 . . ?
 C85 C84 H84 120.0 . . ?
 C80 C84 C85 120.0 . . ?
 C80 C84 H84 120.0 . . ?
 C79 C80 H80 120.0 . . ?
 C84 C80 C79 120.0 . . ?
 C84 C80 H80 120.0 . . ?
 C90 C87 C86 120.0 . . ?
 C90 C87 Cl88 121.4(10) . . ?
 C86 C87 Cl88 118.6(10) . . ?
 C87 C90 H90 120.0 . . ?
 C87 C90 C91 120.0 . . ?
 C91 C90 H90 120.0 . . ?
 C90 C91 H91 120.0 . . ?
 C92 C91 C90 120.0 . . ?
 C92 C91 H91 120.0 . . ?
 C91 C92 H92 120.0 . . ?
 C89 C92 C91 120.0 . . ?
 C89 C92 H92 120.0 . . ?
 C92 C89 H89 120.0 . . ?
 C92 C89 C86 120.0 . . ?
 C86 C89 H89 120.0 . . ?
 C87 C86 Cl78 126.5(11) . . ?
 C89 C86 Cl78 113.5(11) . . ?
 C89 C86 C87 120.0 . . ?
 C78 C72 H72 120.0 . . ?
 C78 C72 C94 120.0 . . ?
 C94 C72 H72 120.0 . . ?
 C72 C78 C82 120.0 . . ?
 C72 C78 Cl2 124.6(11) . . ?
 C82 C78 Cl2 115.4(11) . . ?
 C78 C82 C88 120.0 . . ?
 C78 C82 Cl1 124.6(10) . . ?
 C88 C82 Cl1 115.3(10) . . ?
 C82 C88 H88 120.0 . . ?
 C93 C88 C82 120.0 . . ?
 C93 C88 H88 120.0 . . ?
 C88 C93 H93 120.0 . . ?
 C94 C93 C88 120.0 . . ?
 C94 C93 H93 120.0 . . ?
 C72 C94 H94 120.0 . . ?
 C93 C94 C72 120.0 . . ?
 C93 C94 H94 120.0 . . ?
 C101 C98 Cl97 118.1(11) . . ?
 C101 C98 C99 120.0 . . ?
 C99 C98 Cl97 121.4(11) . . ?
 C98 C101 H101 120.0 . . ?
 C98 C101 C103 120.0 . . ?
 C103 C101 H101 120.0 . . ?
 C101 C103 H103 120.0 . . ?
 C104 C103 C101 120.0 . . ?
 C104 C103 H103 120.0 . . ?
 C103 C104 H104 120.0 . . ?
 C103 C104 C102 120.0 . . ?
 C102 C104 H104 120.0 . . ?
 C104 C102 H102 120.0 . . ?
 C104 C102 C99 120.0 . . ?
 C99 C102 H102 120.0 . . ?
 C98 C99 Cl5 120.0(11) . . ?
 C102 C99 C98 120.0 . . ?
 C102 C99 Cl5 120.0(11) . . ?
 C107 C96 Cl3 125.0(9) . . ?
 C107 C96 C97 120.0 . . ?
 C97 C96 Cl3 114.8(9) . . ?
 C96 C107 H107 120.0 . . ?
 C96 C107 C106 120.0 . . ?
 C106 C107 H107 120.0 . . ?
 C107 C106 H106 120.0 . . ?
 C105 C106 C107 120.0 . . ?
 C105 C106 H106 120.0 . . ?
 C106 C105 H105 120.0 . . ?
 C106 C105 C100 120.0 . . ?
 C100 C105 H105 120.0 . . ?
 C105 C100 H100 120.0 . . ?
 C97 C100 C105 120.0 . . ?
 C97 C100 H100 120.0 . . ?
 C96 C97 Cl 121.2(9) . . ?
 C100 C97 Cl 118.8(9) . . ?
 C100 C97 C96 120.0 . . ?

loop_
  _geom_torsion_atom_site_label_1
  _geom_torsion_atom_site_label_2
  _geom_torsion_atom_site_label_3
  _geom_torsion_atom_site_label_4
  _geom_torsion
  _geom_torsion_site_symmetry_1
  _geom_torsion_site_symmetry_2
  _geom_torsion_site_symmetry_3
  _geom_torsion_site_symmetry_4
  _geom_torsion_publ_flag
 Co1 N9 C47 C46 176.4(4) 2_756 . . . ?
 Co1 N9 C50 C49 -176.2(5) 2_756 . . . ?
 Co1 N10 C68 S1 48(4) . . . . ?
 Co1 N10 C68 S3 -123(5) . . . . ?
 Co1 N1 C5 C75 179.3(5) . . . . ?
 Co1 N1 C1 C2 -179.8(7) . . . . ?
 Co2 N3 C12 C11 175.5(4) 2_756 . . . ?
 Co2 N3 C15 C14 -174.8(5) 2_756 . . . ?
 Co2 N7 C54 C40 175.6(4) . . . . ?
 Co2 N7 C37 C38 -174.7(6) . . . . ?
 Co2 N6 C33 C32 -178.4(5) 2_646 . . . ?
 Co2 N6 C36 C35 179.6(6) 2_646 . . . ?
 Co2 N4 C26 C25 -179.6(5) . . . . ?
 Co2 N4 C29 C28 177.9(6) . . . . ?
 Co2 N11 C69 S8 -124(3) . . . . ?
 Co2 N11 C69 S9 51(8) . . . . ?
 Co2 N12 C70 S5 135(4) . . . . ?
 O3 C53 C52 C51 -179.7(6) . . . . ?
 O3 C63 C64 C65 70.9(9) . . . . ?
 O3 C63 C64 C67 29(2) . . . . ?
 N3 C12 C11 C10 179.7(5) . . . . ?
 N3 C12 C11 C13 -1.0(9) . . . . ?
 N3 C15 C14 C13 0.1(11) . . . . ?
 O2 C21 C20 C19 179.6(6) . . . . ?
 O2 C59 C60 C61 -66.8(9) . . . . ?
 N9 C47 C46 C45 -179.3(5) . . . . ?
 N9 C47 C46 C48 -0.1(9) . . . . ?
 N9 C50 C49 C48 0.1(11) . . . . ?
 N7 C37 C38 C39 -0.5(13) . . . . ?
 N6 C36 C35 C34 -1.5(11) . . . . ?
 N10 C68 S1 S2 -171(2) . . . . ?
 N10 C68 S1 S3 -176(2) . . . . ?
 N10 C68 S3 S1 175(3) . . . . ?
 N5 C24 C25 C26 168.5(6) . . . . ?
 N5 C24 C25 C27 -8.4(9) . . . . ?
 N5 C31 C32 C33 24.8(8) . . . . ?
 N5 C31 C32 C34 -154.1(6) . . . . ?
 N5 C31 C30 C22 -2.1(9) . . . . ?
 N4 C29 C28 C27 2.9(13) . . . . ?
 N1 C1 C2 C3 1.7(13) . . . . ?
 N2 C6 C7 C8 0.2(9) . . . . ?
 N2 C10 C11 C12 -25.6(8) . . . . ?
 N2 C10 C11 C13 155.2(6) . . . . ?
 C43 C42 C41 N8 1.7(9) . . . . ?
 C43 C42 C41 C40 -175.4(6) . . . . ?
 C43 C44 C45 N8 0.7(10) . . . . ?
 C43 C44 C45 C46 -178.3(6) . . . . ?
 C43 C51 C52 C53 -179.6(6) . . . . ?
 C47 N9 C50 C49 0.2(9) . . . . ?
 C47 C46 C45 N8 -22.7(8) . . . . ?
 C47 C46 C45 C44 156.4(6) . . . . ?
 C47 C46 C48 C49 0.5(10) . . . . ?
 C42 C43 C44 C45 0.4(9) . . . . ?
 C42 C43 C51 C53 -130.2(7) . . . 3_667 ?
 C42 C43 C51 C52 48.6(9) . . . . ?
 C22 C23 C24 N5 -2.0(9) . . . . ?
 C22 C23 C24 C25 177.3(6) . . . . ?
 C22 C19 C20 C21 -178.7(6) . . . . ?
 C40 C39 C38 C37 -0.9(12) . . . . ?
 C23 C22 C30 C31 0.4(9) . . . . ?
 C23 C22 C19 C18 135.6(7) . . . . ?
 C23 C22 C19 C20 -46.3(9) . . . . ?
 C23 C24 C25 C26 -10.9(9) . . . . ?
 C23 C24 C25 C27 172.2(6) . . . . ?
 C44 C43 C42 C41 -1.5(9) . . . . ?
 C44 C43 C51 C53 50.9(9) . . . 3_667 ?
 C44 C43 C51 C52 -130.3(7) . . . . ?
 C24 N5 C31 C32 -179.8(5) . . . . ?
 C24 N5 C31 C30 1.7(9) . . . . ?
 C24 C25 C26 N4 -176.4(6) . . . . ?
 C24 C25 C27 C28 177.3(7) . . . . ?
 C9 C8 C7 C6 -0.9(9) . . . . ?
 C9 C8 C16 C17 -132.4(7) . . . . ?
 C9 C8 C16 C21 45.1(9) . . . . ?
 C9 C10 C11 C12 155.6(6) . . . . ?
 C9 C10 C11 C13 -23.7(9) . . . . ?
 C8 C9 C10 N2 0.7(9) . . . . ?
 C8 C9 C10 C11 179.5(6) . . . . ?
 C8 C16 C21 O2 1.4(9) . . . . ?
 C8 C16 C21 C20 179.1(6) . . . . ?
 C25 C27 C28 C29 -1.8(13) . . . . ?
 C75 C6 C7 C8 -176.6(6) . . . . ?
 C75 C3 C2 C1 -1.5(12) . . . . ?
 C5 N1 C1 C2 -1.5(11) . . . . ?
 C5 C75 C6 N2 -162.2(6) . . . . ?
 C5 C75 C6 C7 14.9(9) . . . . ?
 C5 C75 C3 C2 1.2(11) . . . . ?
 C6 N2 C10 C9 -1.4(9) . . . . ?
 C6 N2 C10 C11 179.8(5) . . . . ?
 C6 C75 C5 N1 177.5(6) . . . . ?
 C6 C75 C3 C2 -177.4(7) . . . . ?
 C31 N5 C24 C23 0.3(8) . . . . ?
 C31 N5 C24 C25 -179.0(5) . . . . ?
 C31 C32 C33 N6 -180.0(5) . . . . ?
 C31 C32 C34 C35 179.2(6) . . . . ?
 C32 C31 C30 C22 179.6(6) . . . . ?
 C32 C34 C35 C36 1.0(11) . . . . ?
 C18 C19 C20 C21 -0.5(10) . . . . ?
 C18 C17 C16 C8 -179.3(6) . . . . ?
 C18 C17 C16 C21 3.1(10) . . . . ?
 C7 C8 C16 C17 48.0(9) . . . . ?
 C7 C8 C16 C21 -134.4(7) . . . . ?
 C41 N8 C45 C44 -0.6(9) . . . . ?
 C41 N8 C45 C46 178.5(5) . . . . ?
 C41 C40 C54 N7 178.9(5) . . . . ?
 C41 C40 C39 C38 -178.5(7) . . . . ?
 C33 N6 C36 C35 0.8(10) . . . . ?
 C33 C32 C34 C35 0.2(10) . . . . ?
 C30 C22 C23 C24 1.5(9) . . . . ?
 C30 C22 C19 C18 -46.2(9) . . . . ?
 C30 C22 C19 C20 131.9(7) . . . . ?
 C30 C31 C32 C33 -156.7(6) . . . . ?
 C30 C31 C32 C34 24.4(9) . . . . ?
 C54 N7 C37 C38 0.9(10) . . . . ?
 C54 C40 C41 N8 -161.6(6) . . . . ?
 C54 C40 C41 C42 15.7(9) . . . . ?
 C54 C40 C39 C38 1.7(11) . . . . ?
 C19 C22 C23 C24 179.8(6) . . . . ?
 C19 C22 C30 C31 -177.9(6) . . . . ?
 C19 C18 C17 C16 -1.6(10) . . . . ?
 C19 C18 O4 C55 -166.0(6) . . . . ?
 C17 C18 C19 C22 178.4(6) . . . . ?
 C17 C18 C19 C20 0.3(9) . . . . ?
 C17 C18 O4 C55 12.4(9) . . . . ?
 C17 C16 C21 O2 179.0(6) . . . . ?
 C17 C16 C21 C20 -3.3(10) . . . . ?
 C12 N3 C15 C14 0.4(9) . . . . ?
 C12 C11 C13 C14 1.5(10) . . . . ?
 C16 C8 C7 C6 178.7(6) . . . . ?
 C16 C21 C20 C19 2.1(10) . . . . ?
 C51 C43 C42 C41 179.6(6) . . . . ?
 C51 C43 C44 C45 179.3(6) . . . . ?
 C51 C53 C52 C51 0.8(10) 3_667 . . . ?
 C55 C56 C57 C58 176.2(9) . . . . ?
 C10 N2 C6 C75 178.0(5) . . . . ?
 C10 N2 C6 C7 0.9(9) . . . . ?
 C10 C9 C8 C7 0.5(9) . . . . ?
 C10 C9 C8 C16 -179.1(6) . . . . ?
 C10 C11 C13 C14 -179.2(6) . . . . ?
 C21 O2 C59 C60 -177.2(6) . . . . ?
 C46 C48 C49 C50 -0.5(11) . . . . ?
 C11 C13 C14 C15 -1.1(11) . . . . ?
 C26 N4 C29 C28 -2.0(10) . . . . ?
 C26 C25 C27 C28 0.2(11) . . . . ?
 C53 O3 C63 C64 179.6(6) . . . . ?
 C53 C51 C52 C53 -0.8(10) 3_667 . . . ?
 C37 N7 C54 C40 0.0(9) . . . . ?
 C45 N8 C41 C42 -0.6(9) . . . . ?
 C45 N8 C41 C40 176.6(5) . . . . ?
 C45 C46 C48 C49 179.6(7) . . . . ?
 C15 N3 C12 C11 0.0(9) . . . . ?
 C36 N6 C33 C32 0.5(9) . . . . ?
 C50 N9 C47 C46 -0.2(8) . . . . ?
 C29 N4 C26 C25 0.2(9) . . . . ?
 C59 O2 C21 C16 152.5(6) . . . . ?
 C59 O2 C21 C20 -25.2(10) . . . . ?
 C59 C60 C61 C62 -172.6(10) . . . . ?
 C3 C75 C5 N1 -1.0(10) . . . . ?
 C3 C75 C6 N2 16.3(9) . . . . ?
 C3 C75 C6 C7 -166.6(6) . . . . ?
 C63 O3 C53 C51 -165.7(6) . . . 3_667 ?
 C63 O3 C53 C52 14.8(9) . . . . ?
 C63 C64 C65 C66 176.1(11) . . . . ?
 C63 C64 C67 C66 112(2) . . . . ?
 C34 C32 C33 N6 -1.0(9) . . . . ?
 C1 N1 C5 C75 1.1(9) . . . . ?
 C48 C46 C45 N8 158.2(6) . . . . ?
 C48 C46 C45 C44 -22.7(10) . . . . ?
 C39 C40 C41 N8 18.6(9) . . . . ?
 C39 C40 C41 C42 -164.1(6) . . . . ?
 C39 C40 C54 N7 -1.3(9) . . . . ?
 C27 C25 C26 N4 0.6(10) . . . . ?
 C56 C55 O4 C18 -177.4(6) . . . . ?
 O4 C18 C19 C22 -3.2(9) . . . . ?
 O4 C18 C19 C20 178.7(6) . . . . ?
 O4 C18 C17 C16 -179.9(6) . . . . ?
 O4 C55 C56 C57 71.6(8) . . . . ?
 Cl71 C73 C77 C71 179.8(5) . . . . ?
 C74 C73 C77 C71 0.0 . . . . ?
 C73 C74 C76 C4 0.0 . . . . ?
 C73 C77 C71 C4 0.0 . . . . ?
 C77 C71 C4 C76 0.0 . . . . ?
 C71 C4 C76 C74 0.0 . . . . ?
 C76 C74 C73 Cl71 -179.8(5) . . . . ?
 C76 C74 C73 C77 0.0 . . . . ?
 Cl4 C74 C73 Cl71 -1.9(5) . . . . ?
 Cl4 C74 C73 C77 178.0(5) . . . . ?
 Cl4 C74 C76 C4 -178.0(5) . . . . ?
 Cl72 C79 C81 C83 177.5(7) . . . . ?
 Cl72 C79 C81 Cl82 -2.1(7) . . . . ?
 Cl72 C79 C80 C84 -177.6(6) . . . . ?
 C79 C81 C83 C85 0.0 . . . . ?
 C81 C79 C80 C84 0.0 . . . . ?
 C81 C83 C85 C84 0.0 . . . . ?
 C83 C85 C84 C80 0.0 . . . . ?
 C85 C84 C80 C79 0.0 . . . . ?
 C80 C79 C81 C83 0.0 . . . . ?
 C80 C79 C81 Cl82 -179.6(6) . . . . ?
 Cl82 C81 C83 C85 179.6(6) . . . . ?
 C87 C90 C91 C92 0.0 . . . . ?
 C90 C87 C86 Cl78 179.6(12) . . . . ?
 C90 C87 C86 C89 0.0 . . . . ?
 C90 C91 C92 C89 0.0 . . . . ?
 C91 C92 C89 C86 0.0 . . . . ?
 C92 C89 C86 Cl78 -179.7(11) . . . . ?
 C92 C89 C86 C87 0.0 . . . . ?
 C86 C87 C90 C91 0.0 . . . . ?
 Cl88 C87 C90 C91 -179.5(11) . . . . ?
 Cl88 C87 C86 Cl78 -0.9(13) . . . . ?
 Cl88 C87 C86 C89 179.5(11) . . . . ?
 C72 C78 C82 C88 0.0 . . . . ?
 C72 C78 C82 Cl1 -176.4(12) . . . . ?
 C78 C72 C94 C93 0.0 . . . . ?
 C78 C82 C88 C93 0.0 . . . . ?
 C82 C88 C93 C94 0.0 . . . . ?
 C88 C93 C94 C72 0.0 . . . . ?
 C94 C72 C78 C82 0.0 . . . . ?
 C94 C72 C78 Cl2 179.9(12) . . . . ?
 Cl1 C82 C88 C93 176.8(11) . . . . ?
 Cl2 C78 C82 C88 -179.9(11) . . . . ?
 Cl2 C78 C82 Cl1 3.7(11) . . . . ?
 Cl97 C98 C101 C103 172.2(16) . . . . ?
 Cl97 C98 C99 C102 -171.9(16) . . . . ?
 Cl97 C98 C99 Cl5 6.1(15) . . . . ?
 C98 C101 C103 C104 0.0 . . . . ?
 C101 C98 C99 C102 0.0 . . . . ?
 C101 C98 C99 Cl5 178.1(15) . . . . ?
 C101 C103 C104 C102 0.0 . . . . ?
 C103 C104 C102 C99 0.0 . . . . ?
 C104 C102 C99 C98 0.0 . . . . ?
 C104 C102 C99 Cl5 -178.1(15) . . . . ?
 C99 C98 C101 C103 0.0 . . . . ?
 Cl3 C96 C107 C106 -175.0(13) . . . . ?
 Cl3 C96 C97 Cl -6.1(13) . . . . ?
 Cl3 C96 C97 C100 175.5(12) . . . . ?
 C96 C107 C106 C105 0.0 . . . . ?
 C107 C96 C97 Cl 178.4(13) . . . . ?
 C107 C96 C97 C100 0.0 . . . . ?
 C107 C106 C105 C100 0.0 . . . . ?
 C106 C105 C100 C97 0.0 . . . . ?
 C105 C100 C97 Cl -178.4(13) . . . . ?
 C105 C100 C97 C96 0.0 . . . . ?
 C97 C96 C107 C106 0.0 . . . . ?

_smtbx_masks_special_details       ?
loop_
  _smtbx_masks_void_nr
  _smtbx_masks_void_average_x
  _smtbx_masks_void_average_y
  _smtbx_masks_void_average_z
  _smtbx_masks_void_volume
  _smtbx_masks_void_count_electrons
  _smtbx_masks_void_content
 1 0.515 0.377 0.643 423.3 151.2 '4.25 (C6H4Cl2)'
 2 0.515 0.123 0.143 423.3 152.0 '4.25 (C6H4Cl2)'
 3 0.485 -0.123 0.857 423.3 152.3 '4.25 (C6H4Cl2)'
 4 0.485 0.623 0.357 423.3 153.2 '4.25 (C6H4Cl2)'

_smtbx_masks_void_probe_radius     1.2
_smtbx_masks_void_truncation_radius  1.2
_shelx_res_file
;
TITL cas_091_6_150k_a.res in P2(1)/c
    cas_091_6_150k.res
    created by SHELXL-2018/3 at 11:48:51 on 05-Jan-2022
REM Old TITL
REM SHELXT solution in P2(1)/c: R1 0.330, Rweak 0.011, Alpha 0.083
REM <I/s> 0.000 for 0 systematic absences, Orientation as input
REM Formula found by SHELXT: C198 N26 O42 S6 Co3
CELL 1.54186 15.0516 14.9277 46.0966 90 98.736 90
ZERR 3 0.001 0.0005 0.002 0 0.004 0
LATT 1
SYMM -X,0.5+Y,0.5-Z
SFAC C Cl Co H N O S
UNIT 457.02 32.01 6 405.99 48 12 12
DELU S2 S1
SIMU S1 S2
SADI C67 C64 C65 C64
SIMU S6
DELU S2 S1 S3
SADI S3 C68 S2 C68 S1 C68
SIMU S2 S1 S3
DELU S6
SADI C67 C66 C66 C65
EADP C67 C65
SADI S5 C70 S6 C70
EADP S6 S5
EADP S2 S1 S3
EADP S8 S4 S9
SADI S8 C69 S4 C69 S9 C69
DELU C35 C34 C32 C33 C36
SIMU C34 C32 C33 C36 C35
EADP Cl1 Cl88 Cl78 Cl2
EADP C87 C90 C91 C92 C89 C86 C72 C78 C88 C93 C94 C82
SADI Cl C97 Cl5 C99 Cl3 C96 Cl97 C98 Cl71 C73 Cl4 C74 Cl78 C86 Cl2 C78 Cl1 =
 C82 CL88 C87 CL72 C79 CL82 C81

L.S. 15
PLAN  30
SIZE 0.1 0.117 0.15
TEMP -123.15
CONF
list 4
MORE -1
BOND $H
ABIN
fmap 2
acta
OMIT -2 7 2
OMIT 2 6 9
OMIT -1 5 16
OMIT -1 0 2
OMIT -1 1 2
OMIT -1 4 1
OMIT 7 3 3
OMIT 2 1 1
OMIT 6 9 33
OMIT -3 1 3
OMIT -2 2 5
OMIT -3 10 19
OMIT 0 1 12
OMIT -1 6 13
OMIT -10 3 39
OMIT -4 6 10
OMIT -4 4 12
OMIT -10 6 9
OMIT -1 2 2
REM <olex2.extras>
REM <HklSrc "%./CAS_091_6_150K.hkl">
REM </olex2.extras>

WGHT    0.130000   85.000000
FVAR       0.10896
CO1   3    1.000000    0.500000    0.500000    10.50000    0.02179    0.01245 =
         0.01864    0.00106    0.00466    0.00134
CO2   3    0.664143    0.498822    0.833821    11.00000    0.02102    0.01401 =
         0.01799    0.00071    0.00358    0.00276
PART 1
S4    7    0.696740    0.651062    0.746083    10.60000    0.06279    0.06257 =
         0.03155    0.01924    0.02041    0.01546
S2    7    1.036330    0.674417    0.415954    10.50000    0.05228    0.05907 =
         0.04926    0.03142    0.02469    0.01026
PART 0
O3    6    0.538366    0.318294    1.002314    11.00000    0.03600    0.01997 =
         0.05872    0.00122    0.02839   -0.00251
N3    5    1.198655    0.949644    0.675126    11.00000    0.02256    0.02039 =
         0.01818   -0.00590    0.00307   -0.00845
O2    6    0.810796    0.673361    0.671194    11.00000    0.04018    0.02209 =
         0.06822   -0.00540    0.03113   -0.00741
N9    5    0.864104    0.952998    1.009165    11.00000    0.02253    0.01694 =
         0.02131   -0.00258    0.00634   -0.00446
N7    5    0.726353    0.595738    0.865868    11.00000    0.02607    0.02097 =
         0.02020   -0.00285    0.00615   -0.00216
PART 1
N6    5    0.472125    0.045354    0.657843    11.00000    0.01941    0.01916 =
         0.02346   -0.00857    0.00734   -0.00654
PART 0
N10   5    1.000574    0.597650    0.468163    11.00000    0.02268    0.02440 =
         0.03120   -0.00082    0.00483    0.00311
N5    5    0.597838    0.248398    0.710327    11.00000    0.02400    0.01830 =
         0.02299   -0.00299    0.00295   -0.00496
N8    5    0.740392    0.745138    0.958043    11.00000    0.01938    0.02161 =
         0.02185   -0.00765    0.00406   -0.00859
N4    5    0.603695    0.400322    0.802007    11.00000    0.02931    0.01844 =
         0.02567   -0.00369    0.00977   -0.00431
N1    5    1.063100    0.590771    0.533028    11.00000    0.02811    0.02489 =
         0.02088   -0.00401    0.00721   -0.00214
N2    5    1.078306    0.738115    0.625592    11.00000    0.02291    0.02168 =
         0.02301   -0.00646    0.00584   -0.00917
N11   5    0.663744    0.590335    0.800613    11.00000    0.02832    0.02233 =
         0.03437   -0.00066    0.01341    0.00661
N12   5    0.667010    0.405989    0.867273    11.00000    0.02800    0.02124 =
         0.02598    0.00317    0.00947    0.00659
C43   1    0.620529    0.625535    0.979076    11.00000    0.02240    0.02428 =
         0.02313   -0.00440    0.00872   -0.01022
C47   1    0.826922    0.879623    0.995098    11.00000    0.02219    0.02151 =
         0.02272    0.00415    0.00420   -0.00179
AFIX  43
H47   4    0.857903    0.852318    0.980932    11.00000   -1.20000
AFIX   0
C42   1    0.653108    0.609593    0.952556    11.00000    0.03043    0.01822 =
         0.02371   -0.00229    0.00838   -0.00863
AFIX  43
H42   4    0.635711    0.557455    0.941294    11.00000   -1.20000
AFIX   0
C22   1    0.722610    0.364673    0.690647    11.00000    0.02635    0.01998 =
         0.02742   -0.00225    0.00756   -0.00668
C40   1    0.742730    0.661869    0.914059    11.00000    0.02354    0.01861 =
         0.02441   -0.00497    0.00771   -0.00701
C23   1    0.689421    0.380670    0.717058    11.00000    0.02675    0.02250 =
         0.02179   -0.00549    0.01302   -0.00678
AFIX  43
H23   4    0.708359    0.432020    0.728526    11.00000   -1.20000
AFIX   0
C44   1    0.651264    0.703049    0.994656    11.00000    0.02883    0.02142 =
         0.02537   -0.00513    0.00706   -0.00782
AFIX  43
H44   4    0.631126    0.716119    1.012751    11.00000   -1.20000
AFIX   0
C24   1    0.628337    0.320527    0.726357    11.00000    0.01756    0.01853 =
         0.02307   -0.00366    0.00461   -0.00546
C9    1    0.994562    0.693804    0.663395    11.00000    0.03203    0.02371 =
         0.02537   -0.00350    0.01321   -0.01059
AFIX  43
H9    4    0.976274    0.705893    0.681842    11.00000   -1.20000
AFIX   0
C8    1    0.963898    0.616788    0.647928    11.00000    0.02513    0.02091 =
         0.02617   -0.00770    0.00278   -0.00654
C25   1    0.594002    0.330865    0.754199    11.00000    0.02614    0.02467 =
         0.02460   -0.00197    0.01020   -0.00676
C75   1    1.080308    0.655629    0.581676    11.00000    0.03043    0.02386 =
         0.02381   -0.00332    0.01005   -0.00596
C5    1    1.038809    0.597417    0.560147    11.00000    0.02821    0.02058 =
         0.02320   -0.00682    0.00767   -0.00566
AFIX  43
H5    4    0.991250    0.560616    0.564653    11.00000   -1.20000
AFIX   0
C6    1    1.050190    0.664366    0.610826    11.00000    0.02620    0.01821 =
         0.02820   -0.00011    0.00748   -0.00354
C31   1    0.628219    0.234163    0.684464    11.00000    0.02374    0.02264 =
         0.02114   -0.00463    0.01248   -0.00679
C32   1    0.591589    0.153821    0.668046    11.00000    0.02659    0.02598 =
         0.02109   -0.00322    0.00581   -0.00909
C18   1    0.863352    0.398701    0.669173    11.00000    0.03062    0.01767 =
         0.03365   -0.00567    0.00987   -0.00487
C7    1    0.993259    0.601627    0.621002    11.00000    0.02241    0.02374 =
         0.02580   -0.00763    0.00897   -0.00768
AFIX  43
H7    4    0.974845    0.549600    0.609815    11.00000   -1.20000
AFIX   0
C41   1    0.711412    0.671803    0.943131    11.00000    0.02698    0.02135 =
         0.02350   -0.00769    0.01017   -0.00464
C33   1    0.508740    0.117680    0.671982    11.00000    0.02304    0.01985 =
         0.02112    0.00005    0.00836   -0.00509
AFIX  43
H33   4    0.476395    0.146258    0.685547    11.00000   -1.20000
AFIX   0
C30   1    0.690659    0.289271    0.674377    11.00000    0.02439    0.02376 =
         0.02812   -0.00638    0.00655   -0.00525
AFIX  43
H30   4    0.711766    0.275940    0.656459    11.00000   -1.20000
AFIX   0
C54   1    0.700701    0.605210    0.892526    11.00000    0.02101    0.02331 =
         0.02314   -0.00526    0.00482   -0.00306
AFIX  43
H54   4    0.650962    0.571000    0.896717    11.00000   -1.20000
AFIX   0
C19   1    0.786427    0.426785    0.680417    11.00000    0.02769    0.02562 =
         0.02663   -0.00457    0.01212   -0.00435
C17   1    0.920026    0.461005    0.659159    11.00000    0.02166    0.02280 =
         0.03810   -0.00080    0.00980   -0.00185
AFIX  43
H17   4    0.972601    0.440724    0.652087    11.00000   -1.20000
AFIX   0
C12   1    1.164705    0.874946    0.662138    11.00000    0.02453    0.01993 =
         0.02133    0.00215    0.00567   -0.00613
AFIX  43
H12   4    1.197061    0.847070    0.648439    11.00000   -1.20000
AFIX   0
C16   1    0.901816    0.552767    0.659202    11.00000    0.02376    0.02180 =
         0.03470   -0.00623    0.00957   -0.00974
C51   1    0.558308    0.562521    0.990036    11.00000    0.03152    0.02043 =
         0.02631   -0.00589    0.01155   -0.01040
C55   1    0.965341    0.277971    0.664762    11.00000    0.03588    0.03444 =
         0.04332    0.00022    0.01644   -0.00259
AFIX   3
H55A  4    1.012021    0.299931    0.680632    11.00000   -1.20000
H55B  4    0.978391    0.300151    0.645612    11.00000   -1.20000
AFIX   0
C10   1    1.051589    0.752955    0.652060    11.00000    0.02204    0.02097 =
         0.01889    0.00039    0.00694   -0.00099
C21   1    0.826404    0.581095    0.671048    11.00000    0.02924    0.01484 =
         0.04170   -0.00279    0.00720   -0.00275
C46   1    0.746364    0.841457    0.999980    11.00000    0.02775    0.02262 =
         0.02062   -0.00217    0.00590   -0.00573
C11   1    1.084870    0.834745    0.667250    11.00000    0.02450    0.02271 =
         0.02716    0.00041    0.00539   -0.00210
C26   1    0.630057    0.392046    0.775676    11.00000    0.02141    0.02135 =
         0.01955   -0.00607    0.00602   -0.00403
AFIX  43
H26   4    0.676547    0.430512    0.771315    11.00000   -1.20000
AFIX   0
C70   1    0.664368    0.386830    0.891352    11.00000    0.02520    0.02297 =
         0.02849    0.00513    0.00635    0.00608
C53   1    0.522037    0.408378    1.000850    11.00000    0.03015    0.01964 =
         0.03231   -0.00309    0.01456   -0.00799
C37   1    0.795979    0.644175    0.860526    11.00000    0.03781    0.03689 =
         0.03047   -0.00827    0.01503   -0.01197
AFIX  43
H37   4    0.814584    0.639193    0.841800    11.00000   -1.20000
AFIX   0
C45   1    0.710346    0.760440    0.984000    11.00000    0.02384    0.02496 =
         0.02375   -0.00727    0.00890   -0.00697
C15   1    1.152757    0.989593    0.694694    11.00000    0.02856    0.02505 =
         0.02970   -0.00612    0.01579   -0.00703
AFIX  43
H15   4    1.175839    1.043214    0.704067    11.00000   -1.20000
AFIX   0
C13   1    1.039127    0.876644    0.687994    11.00000    0.03009    0.03876 =
         0.03603   -0.01741    0.01835   -0.01303
AFIX  43
H13   4    0.985150    0.851455    0.692714    11.00000   -1.20000
AFIX   0
C36   1    0.519352    0.004483    0.638641    11.00000    0.02816    0.02680 =
         0.02749   -0.01051    0.01102   -0.01180
AFIX  43
H36   4    0.494121   -0.046620    0.628194    11.00000   -1.20000
AFIX   0
C50   1    0.818634    0.990560    1.029058    11.00000    0.02478    0.02333 =
         0.03086   -0.00792    0.00919   -0.00906
AFIX  43
H50   4    0.843295    1.042392    1.039205    11.00000   -1.20000
AFIX   0
C29   1    0.538796    0.345854    0.807884    11.00000    0.03420    0.03511 =
         0.03282   -0.00884    0.01175   -0.01077
AFIX  43
H29   4    0.520350    0.349190    0.826670    11.00000   -1.20000
AFIX   0
C59   1    0.719443    0.702676    0.670234    11.00000    0.03613    0.03715 =
         0.03552   -0.00123    0.01045   -0.00152
AFIX   3
H59A  4    0.681463    0.678226    0.652584    11.00000   -1.20000
H59B  4    0.696013    0.682156    0.688044    11.00000   -1.20000
AFIX   0
C3    1    1.150489    0.707772    0.574889    11.00000    0.04108    0.03679 =
         0.03269   -0.01122    0.01517   -0.02052
AFIX  43
H3    4    1.181283    0.747505    0.589081    11.00000   -1.20000
AFIX   0
C52   1    0.578463    0.470596    0.990921    11.00000    0.02868    0.02375 =
         0.03034   -0.00006    0.01095   -0.00770
AFIX  43
H52   4    0.632233    0.450668    0.984536    11.00000   -1.20000
AFIX   0
C63   1    0.626645    0.287857    0.999945    11.00000    0.02973    0.03822 =
         0.03826    0.00099    0.01145    0.00081
AFIX  23
H63A  4    0.670430    0.314559    1.015783    11.00000   -1.20000
H63B  4    0.643050    0.306650    0.980854    11.00000   -1.20000
AFIX   0
C34   1    0.638572    0.110411    0.648498    11.00000    0.02519    0.03504 =
         0.03865   -0.01818    0.01505   -0.01890
AFIX  43
H34   4    0.695373    0.132234    0.645091    11.00000   -1.20000
AFIX   0
C20   1    0.769757    0.520104    0.680893    11.00000    0.02992    0.01858 =
         0.03723   -0.00954    0.01001   -0.00925
AFIX  43
H20   4    0.717869    0.541022    0.688240    11.00000   -1.20000
AFIX   0
C1    1    1.131637    0.642642    0.527568    11.00000    0.03977    0.03821 =
         0.03771   -0.01094    0.02257   -0.01415
AFIX  43
H1    4    1.150466    0.637762    0.508873    11.00000   -1.20000
AFIX   0
C48   1    0.702233    0.882089    1.020752    11.00000    0.03286    0.03614 =
         0.03068   -0.01443    0.01869   -0.01684
AFIX  43
H48   4    0.647129    0.858040    1.024933    11.00000   -1.20000
AFIX   0
C39   1    0.816340    0.709913    0.907839    11.00000    0.04174    0.04074 =
         0.03330   -0.01455    0.02007   -0.02473
AFIX  43
H39   4    0.848247    0.748417    0.922196    11.00000   -1.20000
AFIX   0
C27   1    0.524534    0.275343    0.761165    11.00000    0.03953    0.04896 =
         0.03216   -0.01911    0.01907   -0.03296
AFIX  43
H27   4    0.497113    0.232076    0.747554    11.00000   -1.20000
AFIX   0
C68   1    1.013866    0.631261    0.446669    11.00000    0.02757    0.03744 =
         0.03309    0.01097    0.01279    0.00952
C69   1    0.675607    0.618686    0.777891    11.00000    0.02854    0.02876 =
         0.02883    0.01256    0.01046    0.00966
C38   1    0.842632    0.701408    0.880860    11.00000    0.04453    0.05601 =
         0.03475   -0.02307    0.02682   -0.02771
AFIX  43
H38   4    0.892448    0.734531    0.876176    11.00000   -1.20000
AFIX   0
C35   1    0.601042    0.034000    0.633875    11.00000    0.04181    0.03136 =
         0.04687   -0.01630    0.02460   -0.01490
AFIX  43
H35   4    0.632732    0.002930    0.620652    11.00000   -1.20000
AFIX   0
C28   1    0.497535    0.285293    0.788034    11.00000    0.05310    0.05736 =
         0.04052   -0.01556    0.03244   -0.03042
AFIX  43
H28   4    0.449616    0.249729    0.792931    11.00000   -1.20000
AFIX   0
C14   1    1.073204    0.954550    0.701428    11.00000    0.03719    0.03610 =
         0.03696   -0.01292    0.01603   -0.00704
AFIX  43
H14   4    1.042294    0.983962    0.715208    11.00000   -1.20000
AFIX   0
C64   1    0.629434    0.188987    1.002289    11.00000    0.04733    0.03778 =
         0.07651    0.00987    0.02132    0.00383
PART 1
AFIX  23
H64A  4    0.602869    0.169583    1.019633    10.75000   -1.20000
H64B  4    0.692514    0.167975    1.004716    10.75000   -1.20000
AFIX   3
PART 2
H64C  4    0.648584    0.179127    1.023559    10.25000   -1.20000
H64D  4    0.679274    0.173007    0.991499    10.25000   -1.20000
AFIX   0
PART 0
C56   1    0.963260    0.176574    0.664836    11.00000    0.04672    0.02889 =
         0.07196    0.00934    0.02738    0.00392
AFIX  23
H56A  4    0.938821    0.155701    0.682422    11.00000   -1.20000
H56B  4    1.025441    0.153592    0.666151    11.00000   -1.20000
AFIX   0
C60   1    0.719536    0.802975    0.669059    11.00000    0.05279    0.03602 =
         0.06235    0.00607    0.02090    0.01005
AFIX  23
H60A  4    0.656580    0.824407    0.665428    11.00000   -1.20000
H60B  4    0.748969    0.822337    0.652306    11.00000   -1.20000
AFIX   0
C2    1    1.175530    0.701437    0.547063    11.00000    0.04202    0.05782 =
         0.03566   -0.01405    0.02085   -0.02852
AFIX  43
H2    4    1.222534    0.737709    0.541868    11.00000   -1.20000
AFIX   0
C49   1    0.738496    0.957917    1.035456    11.00000    0.03414    0.04603 =
         0.04016   -0.02170    0.02128   -0.01533
AFIX  43
H49   4    0.708572    0.986607    1.049629    11.00000   -1.20000
AFIX   0
C57   1    0.905525    0.137517    0.637066    11.00000    0.06628    0.04733 =
         0.07960   -0.00567    0.01128   -0.00071
AFIX  23
H57A  4    0.842720    0.157928    0.636542    11.00000   -1.20000
H57B  4    0.927526    0.162332    0.619549    11.00000   -1.20000
AFIX   0
C61   1    0.767306    0.846529    0.696860    11.00000    0.07975    0.04127 =
         0.08725    0.00937    0.02715    0.00811
AFIX  23
H61A  4    0.743264    0.821123    0.713925    11.00000   -1.20000
H61B  4    0.832062    0.831558    0.699081    11.00000   -1.20000
AFIX   0
PART 1
C65   1    0.575469    0.148101    0.973944    10.75000    0.05246    0.03834 =
         0.08476    0.00074    0.01187    0.00684
AFIX  23
H65A  4    0.512431    0.168652    0.972565    10.75000   -1.20000
H65B  4    0.599719    0.173670    0.956941    10.75000   -1.20000
AFIX   0
PART 0
C58   1    0.905904    0.038609    0.635088    11.00000    0.14484    0.05083 =
         0.12238   -0.00494    0.03809   -0.00050
AFIX 137
H58A  4    0.868598    0.019701    0.616820    11.00000   -1.50000
H58B  4    0.881737    0.013131    0.651863    11.00000   -1.50000
H58C  4    0.967628    0.017472    0.635269    11.00000   -1.50000
AFIX   0
C62   1    0.757084    0.947382    0.697174    11.00000    0.18768    0.04018 =
         0.10430   -0.01410    0.02365   -0.00465
AFIX   3
H62A  4    0.781474    0.972562    0.680924    11.00000   -1.50000
H62B  4    0.694504    0.962432    0.695514    11.00000   -1.50000
H62C  4    0.788674    0.971092    0.715204    11.00000   -1.50000
AFIX   0
C66   1    0.574343    0.048982    0.970761    11.00000    0.14614    0.07603 =
         0.16315   -0.03228    0.01654    0.00894
PART 2
AFIX   3
H66D  4    0.577903    0.079672    0.952701    10.25000   -1.50000
H66E  4    0.628453    0.015352    0.976561    10.25000   -1.50000
H66F  4    0.523843    0.008922    0.968081    10.25000   -1.50000
AFIX   3
PART 1
H66A  4    0.545993    0.020302    0.985611    10.75000   -1.50000
H66B  4    0.541333    0.035702    0.951751    10.75000   -1.50000
H66C  4    0.634793    0.027272    0.971851    10.75000   -1.50000
AFIX   0
PART 0
S1    7    1.018346    0.646167    0.411801    10.20000    0.05228    0.05907 =
         0.04926    0.03142    0.02469    0.01026
PART 2
C67   1    0.564186    0.113303    0.995155    10.25000    0.05246    0.03834 =
         0.08476    0.00074    0.01187    0.00684
AFIX  23
H67A  4    0.503441    0.139993    0.990656    10.25000   -1.20000
H67B  4    0.565222    0.077488    1.013279    10.25000   -1.20000
AFIX   0
PART 1
S6    7    0.659951    0.368224    0.926188    10.70000    0.06445    0.03366 =
         0.02703    0.00720    0.01435    0.01484
PART 3
S3    7    1.045565    0.697491    0.421596    10.30000    0.05228    0.05907 =
         0.04926    0.03142    0.02469    0.01026
PART 2
S5    7    0.646625    0.343778    0.922113    10.30000    0.06445    0.03366 =
         0.02703    0.00720    0.01435    0.01484
PART 0
O4    6    0.878822    0.307987    0.669541    11.00000    0.03214    0.02351 =
         0.05864   -0.00461    0.02426   -0.00430
PART 2
S8    7    0.710015    0.682159    0.753262    10.20000    0.06279    0.06257 =
         0.03155    0.01924    0.02041    0.01546
PART 3
S9    7    0.679398    0.636270    0.743505    10.20000    0.06279    0.06257 =
         0.03155    0.01924    0.02041    0.01546

PART 1
CL71  2    0.806268    0.705215    0.595235    11.00000    0.14505    0.14042 =
         0.08941   -0.01067   -0.02930    0.08790
AFIX  66
C74   1    0.647204    0.789189    0.581797    11.00000    0.08305    0.07199 =
         0.04036   -0.00200   -0.00494    0.00629
C73   1    0.739818    0.794005    0.582725    11.00000    0.07067    0.08157 =
         0.04553   -0.00211   -0.00377    0.03611
C77   1    0.778621    0.871226    0.573376    11.00000    0.06801    0.12232 =
         0.05647   -0.01144    0.00741    0.01574
AFIX  43
H77   4    0.841918    0.874517    0.574010    11.00000   -1.20000
AFIX  65
C71   1    0.724810    0.943631    0.563099    11.00000    0.07426    0.10465 =
         0.04628   -0.01071   -0.00431    0.00723
AFIX  43
H71   4    0.751331    0.996408    0.556709    11.00000   -1.20000
AFIX  65
C4    1    0.632197    0.938816    0.562171    11.00000    0.09125    0.07735 =
         0.04175   -0.00999   -0.00015    0.03521
AFIX  43
H4    4    0.595420    0.988302    0.555148    11.00000   -1.20000
AFIX  65
C76   1    0.593393    0.861596    0.571520    11.00000    0.06096    0.08303 =
         0.02873   -0.01002   -0.00486    0.01689
AFIX  43
H76   4    0.530095    0.858305    0.570886    11.00000   -1.20000
AFIX   0
CL4   2    0.596772    0.694587    0.591992    11.00000    0.15796    0.12291 =
         0.10456    0.04142   -0.03562   -0.05676

PART 0
CL72  2    0.945779    0.684985    1.022912    11.00000    0.11152    0.07412 =
         0.16188    0.02328    0.03597    0.00975
AFIX  66
C79   1    0.929132    0.571962    1.023390    11.00000    0.06468    0.07339 =
         0.10509    0.00554    0.01844    0.00535
C81   1    0.969663    0.518092    1.046228    11.00000    0.07427    0.10429 =
         0.09856    0.00018    0.02629   -0.01445
C83   1    0.951175    0.426853    1.046140    11.00000    0.13265    0.07753 =
         0.13926    0.01887    0.06941   -0.00512
AFIX  43
H83   4    0.978876    0.390036    1.061749    11.00000   -1.20000
AFIX  65
C85   1    0.892156    0.389485    1.023212    11.00000    0.12801    0.10338 =
         0.22417   -0.06768    0.09489   -0.05118
AFIX  43
H85   4    0.879521    0.327128    1.023152    11.00000   -1.20000
AFIX  65
C84   1    0.851625    0.443355    1.000374    11.00000    0.08248    0.10821 =
         0.13532   -0.02898    0.05228   -0.02671
AFIX  43
H84   4    0.811289    0.417815    0.984704    11.00000   -1.20000
AFIX  65
C80   1    0.870112    0.534593    1.000462    11.00000    0.07589    0.11266 =
         0.10012   -0.00246    0.02355    0.01654
AFIX  43
H80   4    0.842411    0.571411    0.984853    11.00000   -1.20000
AFIX   0
CL82  2    1.042488    0.564166    1.074888    11.00000    0.12812    0.17614 =
         0.10649    0.00589    0.00018   -0.04260

PART 1
CL78  2    0.775034    1.141013    0.752291    10.50000    0.08285    0.12676 =
         0.12751    0.00967   -0.00789    0.02431
AFIX  66
C87   1    0.958686    1.107454    0.759676    10.50000    0.07030    0.11687 =
         0.05071   -0.02842   -0.00763    0.01157
C90   1    1.045655    1.136584    0.758291    10.50000    0.07030    0.11687 =
         0.05071   -0.02842   -0.00763    0.01157
AFIX  43
H90   4    1.094995    1.097068    0.763460    10.50000   -1.20000
AFIX  65
C91   1    1.060433    1.223533    0.749345    10.50000    0.07030    0.11687 =
         0.05071   -0.02842   -0.00763    0.01157
AFIX  43
H91   4    1.119872    1.243442    0.748398    10.50000   -1.20000
AFIX  65
C92   1    0.988242    1.281352    0.741783    10.50000    0.07030    0.11687 =
         0.05071   -0.02842   -0.00763    0.01157
AFIX  43
H92   4    0.998343    1.340778    0.735669    10.50000   -1.20000
AFIX  65
C89   1    0.901273    1.252223    0.743168    10.50000    0.07030    0.11687 =
         0.05071   -0.02842   -0.00763    0.01157
AFIX  43
H89   4    0.851934    1.291740    0.737999    10.50000   -1.20000
AFIX  65
C86   1    0.886494    1.165274    0.752114    10.50000    0.07030    0.11687 =
         0.05071   -0.02842   -0.00763    0.01157
AFIX   0
CL88  2    0.938168    1.002532    0.770720    10.50000    0.08285    0.12676 =
         0.12751    0.00967   -0.00789    0.02431
PART 2
AFIX  66
C72   1    0.926232    1.234300    0.749168    10.50000    0.07030    0.11687 =
         0.05071   -0.02842   -0.00763    0.01157
AFIX  43
H72   4    0.893582    1.287298    0.743175    10.50000   -1.20000
AFIX  65
C78   1    0.883175    1.162453    0.760255    10.50000    0.07030    0.11687 =
         0.05071   -0.02842   -0.00763    0.01157
C82   1    0.930948    1.084907    0.769023    10.50000    0.07030    0.11687 =
         0.05071   -0.02842   -0.00763    0.01157
C88   1    1.021777    1.079209    0.766704    10.50000    0.07030    0.11687 =
         0.05071   -0.02842   -0.00763    0.01157
AFIX  43
H88   4    1.054427    1.026210    0.772697    10.50000   -1.20000
AFIX  65
C93   1    1.064835    1.151055    0.755617    10.50000    0.07030    0.11687 =
         0.05071   -0.02842   -0.00763    0.01157
AFIX  43
H93   4    1.126913    1.147160    0.754033    10.50000   -1.20000
AFIX  65
C94   1    1.017064    1.228601    0.746849    10.50000    0.07030    0.11687 =
         0.05071   -0.02842   -0.00763    0.01157
AFIX  43
H94   4    1.046492    1.277705    0.739272    10.50000   -1.20000
AFIX   0
CL1   2    0.884465    0.989015    0.781316    10.50000    0.08285    0.12676 =
         0.12751    0.00967   -0.00789    0.02431
CL2   2    0.772759    1.160935    0.764279    10.50000    0.08285    0.12676 =
         0.12751    0.00967   -0.00789    0.02431

PART 1
CL97  2    1.164308    0.424860    0.645275    10.50000    0.09365
AFIX  66
C98   1    1.222336    0.517921    0.642933    10.50000    0.08924
C101  1    1.236944    0.573689    0.667341    10.50000    0.10593
AFIX  43
H101  4    1.207721    0.561857    0.683810    10.50000   -1.20000
AFIX  65
C103  1    1.294312    0.646767    0.667650    10.50000    0.06689
AFIX  43
H103  4    1.304296    0.684881    0.684332    10.50000   -1.20000
AFIX  65
C104  1    1.337071    0.664078    0.643553    10.50000    0.07502
AFIX  43
H104  4    1.376280    0.714024    0.643765    10.50000   -1.20000
AFIX  65
C102  1    1.322463    0.608311    0.619145    10.50000    0.09434
AFIX  43
H102  4    1.351687    0.620143    0.602675    10.50000   -1.20000
AFIX  65
C99   1    1.265096    0.535232    0.618835    10.50000    0.08912
AFIX   0
PART 2
CL    2    1.274720    0.447642    0.582556    10.50000    0.11221
CL3   2    1.157336    0.433291    0.629363    10.50000    0.09463
AFIX  66
C96   1    1.237147    0.517540    0.632947    10.50000    0.04937
C107  1    1.249682    0.580157    0.655516    10.50000    0.08225
AFIX  43
H107  4    1.216097    0.575761    0.671321    10.50000   -1.20000
AFIX  65
C106  1    1.311359    0.649206    0.654961    10.50000    0.05641
AFIX  43
H106  4    1.319926    0.692002    0.670387    10.50000   -1.20000
AFIX  65
C105  1    1.360499    0.655639    0.631837    10.50000    0.08668
AFIX  43
H105  4    1.402652    0.702831    0.631457    10.50000   -1.20000
AFIX  65
C100  1    1.347965    0.593022    0.609267    10.50000    0.08066
AFIX  43
H100  4    1.381550    0.597419    0.593462    10.50000   -1.20000
AFIX  65
C97   1    1.286289    0.523972    0.609822    10.50000    0.07279
AFIX   0
PART 1
CL5   2    1.249111    0.461935    0.588105    10.50000    0.14170
HKLF 4


REM  cas_091_6_150k_a.res in P2(1)/c
REM wR2 = 0.3534, GooF = S = 1.082, Restrained GooF = 1.087 for all data
REM R1 = 0.1267 for 12630 Fo > 4sig(Fo) and 0.1699 for all 19075 data
REM 1014 parameters refined using 126 restraints

END

WGHT      0.2000      0.0000

REM Highest difference peak  1.680,  deepest hole -0.999,  1-sigma level  0.155
Q1    1   0.8786  0.8178  0.5837  11.00000  0.05    0.98
Q2    1   1.2675  0.6403  0.6775  11.00000  0.05    0.95
Q3    1   1.3957  0.6243  0.6063  11.00000  0.05    0.92
Q4    1   0.9742  1.0014  0.7724  11.00000  0.05    0.92
Q5    1   0.8147  0.4346  0.9689  11.00000  0.05    0.91
Q6    1   1.1568  0.4752  0.6621  11.00000  0.05    0.90
Q7    1   0.8198  0.4806  0.9948  11.00000  0.05    0.87
Q8    1   0.6232  0.3115  0.9116  11.00000  0.05    0.87
Q9    1   0.7732  0.8588  0.6755  11.00000  0.05    0.72
Q10   1   0.6842  0.6787  0.5931  11.00000  0.05    0.71
Q11   1   1.2745  0.5011  0.5794  11.00000  0.05    0.68
Q12   1   0.8373  1.2867  0.7490  11.00000  0.05    0.68
Q13   1   1.0238  1.0609  0.7705  11.00000  0.05    0.67
Q14   1   0.9086  0.1133  0.6649  11.00000  0.05    0.66
Q15   1   0.8408  0.7447  0.5758  11.00000  0.05    0.66
Q16   1   1.0419  0.4819  1.0737  11.00000  0.05    0.66
Q17   1   0.9727  0.6836  0.9965  11.00000  0.05    0.65
Q18   1   1.0003  0.4224  1.0645  11.00000  0.05    0.64
Q19   1   1.0225  0.6395  0.4190  11.00000  0.05    0.62
Q20   1   0.5188  0.3319  0.9954  11.00000  0.05    0.60
Q21   1   0.8795  0.5221  0.9708  11.00000  0.05    0.60
Q22   1   0.9925  0.5955  0.4566  11.00000  0.05    0.60
Q23   1   0.9155  0.6365  1.0041  11.00000  0.05    0.59
Q24   1   0.8912  0.5394  0.9803  11.00000  0.05    0.59
Q25   1   0.8435  0.9253  1.0044  11.00000  0.05    0.58
Q26   1   1.0227  1.3004  0.7470  11.00000  0.05    0.58
Q27   1   1.0621  1.3187  0.7407  11.00000  0.05    0.57
Q28   1   0.5651  0.1422  0.9963  11.00000  0.05    0.57
Q29   1   0.5230  0.5203  0.6705  11.00000  0.05    0.57
Q30   1   0.8600  0.3300  0.6612  11.00000  0.05    0.56
;
_shelx_res_checksum                89906
_shelx_hkl_file
;
   2  -3   7   10.74    0.22
   3  -1  -7  207.03    0.68
   5  -4   4    9.95    0.52
   6  -3  -5   19.37    0.46
   7  -3  -5    4.65    0.66
   7  -1 -12   18.96    0.69
   7   3 -18    9.86    0.51
   9  -4   2   16.33    0.65
   9  -3  -5   -0.33    0.64
  10  -4   6   12.89    0.68
  10  -4   8    3.78    0.68
  10  -4   9   17.55    0.80
  10  -4  11    1.17    0.82
  10  -4  12    0.36    0.68
  10  -4  13   80.45    0.97
  10  -3  -4    0.77    0.60
  10  -2  -8  170.54    1.61
  10   1 -16    0.53    0.50
  10   2 -17    7.02    0.65
  10   3 -18    0.32    0.53
  11  -2  -7    6.42    0.66
  11   1 -15    2.25    0.56
  11   3 -17    0.53    0.76
  12  -3   4    2.02    0.62
  12  -3  10    6.17    0.91
  12  -3  11    1.90    0.89
  12  -3  13    0.26    0.63
  12  -2  -5    0.08    0.85
  12  -2  -4    4.51    0.79
  12  -1  -9    1.09    0.64
  12   3 -16    0.88    0.61
  13  -2   0    9.56    0.73
  13  -1  -6    2.57    0.65
  14  -1   0    1.78    0.61
  14   0  -6    0.87    0.62
  14   1  -9   -0.77    0.76
  14   2 -11    1.02    0.75
   2  -2   0   17.89    0.31
   4  -4  11   10.57    0.45
   4  -4  12    0.52    0.43
   5  -2  -7    9.05    0.40
   5  -1 -10  146.85    0.97
   6  -3  -4   37.22    0.66
   6  -2  -8    2.78    0.51
   6  -1 -11   24.10    0.69
   6   1 -15   64.17    0.77
   8   0 -14    0.40    0.63
   8   3 -18   41.84    0.77
   9  -4   4    3.01    0.70
   9  -4   5   11.60    1.07
   9  -3  -4    2.95    0.68
   9   3 -18    5.41    0.66
  10  -3  -3   37.31    1.02
  10  -3  -2   44.38    1.31
  10   1 -15   18.92    1.04
  11  -3   0    1.98    0.84
  11  -3   1    1.76    1.15
  11  -1 -10  203.70    1.77
  11   0 -12    2.37    1.04
  11   1 -14    0.74    0.92
  12  -3   8    1.21    0.80
  12  -3   9   75.65    1.27
  12  -1  -8   -0.25    0.82
  12   1 -13   -1.74    0.85
  13  -2   2    3.49    0.88
  13  -2   5   -0.93    1.07
  13  -2  12    3.93    0.96
  13   0  -8  117.36    1.55
  13   2 -12    0.47    0.99
  14  -1   2    1.79    0.81
  14  -1   3    0.21    0.89
  14   0  -4   43.74    1.15
  14   1  -8   -0.99    0.85
  14   3 -11    0.36    0.70
   3  -3   3 3245.79    3.35
   4  -2  -5  524.55    1.54
   6  -3  -3  819.89    2.46
   6   2 -16   17.04    0.56
   7  -4   3    0.37    0.60
   7  -4   4  532.25    2.28
   7  -2  -8 1044.91    2.94
   8  -2  -8   -1.22    0.76
   9  -4  10    5.76    1.02
  10  -1 -10    7.28    1.04
  10   2 -16   -0.54    0.88
  10   3 -17    7.87    0.86
  11  -3   3    5.31    1.19
  11  -1  -9    9.91    0.98
  11   2 -15    0.63    0.94
  11   3 -16   66.03    1.33
  12  -2  -1    1.93    1.24
  12  -1  -7   19.67    1.09
  12   0 -10   14.38    1.02
  12   1 -12   -0.05    0.83
  12   3 -15    6.47    0.81
  13  -2   8    1.49    0.90
  13  -2   9    3.48    0.87
  13  -1  -3   10.99    1.04
  13   1 -10    0.05    0.92
  13   3 -13   -0.63    0.83
  14   0  -2    4.76    1.16
  14   1  -6    0.48    1.05
  14   2  -9    1.33    0.89
   4  -1  -8  713.38    1.73
   5  -4   8  620.79    2.05
   5  -2  -6    4.95    0.41
   5   3 -16   29.98    0.47
   6  -1 -10    0.64    0.56
   7  -4   5   -0.83    0.58
   7   1 -15   14.57    0.60
   8  -4  13    1.82    0.78
   8  -4  14  100.96    1.25
   9  -3  -2    1.24    0.78
   9   3 -17    5.01    0.76
  10  -3   0   11.58    0.98
  10  -2  -6    0.65    0.82
  10   0 -12    1.29    0.91
  10   1 -14   38.95    1.10
  11  -3   5    3.83    0.90
  11  -3   6    4.34    1.14
  11  -3   7   -0.25    1.04
  11  -3  12    0.07    0.98
  11  -3  14    0.25    0.93
  11  -2  -4   19.69    1.10
  11   1 -13    9.24    0.91
  12  -2   1    1.79    1.06
  12  -1  -6    1.04    0.97
  12  -1  -5    2.85    1.12
  12   1 -11    4.20    1.01
  12   3 -14   -1.62    0.92
  12   4 -15  175.00    1.85
  13  -1  -2    0.85    0.99
  13   1  -9    8.94    0.98
  13   3 -12    4.66    1.03
  13   4 -13   -1.24    0.92
  14   0   0    1.46    1.07
  14   1  -5    7.87    1.03
  14   2  -8    2.47    0.89
   2  -2   1    6.91    0.23
   3  -3   4    0.18    0.27
   3  -1  -6  945.19    1.68
   5  -4  11  261.80    1.31
   5  -4  12    4.62    0.47
   6  -3  -2   22.73    0.63
   7  -4   7  113.29    1.21
   7  -4  14    4.11    0.69
   7  -3  -2  279.31    1.56
   7  -2  -7    3.94    0.59
   7  -1 -10   25.57    0.73
  10  -3   1   18.13    0.98
  10  -3   2   -0.30    1.03
  10  -2  -5  113.82    1.42
  10  -1  -9    0.59    0.77
  11  -3   8    4.79    0.92
  11  -3   9    1.29    0.84
  11  -1  -7   16.69    1.02
  11   3 -15    0.76    0.85
  11   4 -16   79.12    1.21
  12  -2   3   -0.84    1.03
  12  -1  -4    0.24    0.97
  13  -1   0    0.84    0.96
  13   1  -8    6.05    0.93
  13   2 -10    0.95    0.96
  14   0   2   68.85    1.45
  14   1  -4    0.49    0.88
  14   2  -7   -0.03    0.79
  14   3  -8    1.51    0.95
   5  -2  -5    0.92    0.40
   6  -4  12  562.98    1.94
   6  -3  -1   18.03    0.60
   7  -4  12    0.07    0.58
   7  -4  13    5.42    0.64
   7  -2  -6   25.94    0.72
   7   0 -12    0.93    0.57
   7   1 -14  127.31    1.01
   9  -3   0    8.21    0.73
   9  -3   1   18.62    0.87
  10  -3   3   13.83    0.89
  10  -3   4   22.80    1.04
  10  -2  -4   17.86    0.86
  10  -1  -8   -0.01    0.70
  10   1 -13   20.52    0.83
  11  -2  -1   -1.16    0.80
  11   1 -12    3.79    0.77
  12  -2   7    5.23    0.98
  12  -2  13    1.59    0.83
  12   3 -13   32.33    1.01
  12   4 -14    2.88    0.75
  13  -1   2    4.22    0.91
  13  -1   3    5.47    1.02
  13  -1   4    1.43    0.97
  13   1  -7    0.22    0.82
  13   3 -11  148.07    1.65
  13   4 -12   -0.89    0.64
  14   0   4    0.94    0.80
  14   2  -6    0.93    0.73
  14   2  -5    1.09    0.89
   4  -1  -7  139.20    0.71
   6  -1  -9  556.27    1.74
  10  -3   5   -0.09    0.70
  10  -2  -3  133.14    1.38
  11  -2   0    1.25    0.78
  11   2 -13   25.20    0.87
  12  -2  11    5.47    0.80
  12  -1  -2    2.15    0.84
  12   1  -9    1.83    0.73
  12   2 -11    2.15    0.72
  13  -1   6   -0.04    0.74
  13  -1  12    6.91    0.75
  13  -1  13   57.51    1.09
  13   1  -6    2.50    0.80
   2   0  -8  563.26    0.76
   2   0   0    5.27    0.12
   2   1  10    1.57    0.12
   3   3  17    3.04    0.20
   5   2 -20    1.46    0.14
   6   2 -17    1.41    0.32
   7   2 -13   19.35    0.31
   7   2 -12    8.11    0.39
   7   2  -1    6.12    1.73
   7   6  15   -0.41    0.50
   8   4 -20   -0.04    0.25
   8   7  13   13.63    0.66
   9   4 -13    8.54    0.65
   9   4  -2    3.08    2.33
   9   5   4    1.16    0.63
   9   6   7    1.88    0.63
   9   8  10   23.97    0.81
  10   6 -15    6.29    0.71
  10   6 -14   54.35    0.91
  10   6  -1   -0.52    0.60
  10   6   0    0.35    0.73
  10   7 -18    0.23    0.63
  10   7   2    1.15    0.60
  10   9   5    1.38    0.65
  11   9  -8    1.28    0.69
   2   2  15    2.09    0.11
   3   0  -6    3.53    0.10
   3   0  -4  104.54    0.32
   3   0  -2    6.68    0.13
   6   2   7   27.98    0.32
   6   3  11   28.38    0.31
   6   4  14   19.42    0.44
   7   2   2   28.59    0.36
   7   5  14    6.57    0.30
   8   4   7    0.84    0.24
   8   7  14   -0.33    0.29
   9   4 -14   -0.03    0.26
   9   4   0    1.19    0.30
   9   4   1    6.36    0.36
   9   5   5    0.88    0.53
   9   6 -22    1.81    0.31
   9   7  10    3.06    0.36
   9   9  11   -0.04    0.26
   9  10  11    0.26    0.23
  10   5 -10    3.35    0.40
  10   5  -7   25.93    0.52
  10   5  -4    9.36    0.43
  10   6 -16   -0.15    0.30
  10   6   1   -0.21    0.33
  10   7 -19    0.04    0.34
  10   8 -21    0.09    0.39
  10   8   5    0.12    0.32
  10   9   6   -0.09    0.29
  11   8 -12    0.56    0.48
  11   8 -11   -0.07    0.39
  11   8  -9    0.37    0.38
  11   8  -8    1.98    0.35
  11   8  -6    5.65    0.43
  11   9 -14    4.16    0.37
  11   9 -12    4.46    0.33
  11   9 -11   -0.13    0.29
   3   0  -8  207.70    0.51
   3   2  14   21.66    0.21
   4   3  16   24.61    0.28
   5   1 -15    0.86    0.33
   5   1   4   44.27    0.30
   6   1 -10    0.52    0.24
   7   2   3    7.49    0.34
   8   5  11   21.30    0.53
   8   6  13    5.09    0.45
   9   5 -20    0.06    0.40
   9   9  12    0.68    0.41
  10   5 -13    1.14    0.49
  10   5 -12    1.04    0.41
  10   5  -1   21.17    0.62
  10   6 -18    0.89    0.44
  10   6   2    2.12    0.34
  10   6   3    5.04    0.55
  10   7   5    1.23    0.43
  10   8   6    3.13    0.34
  11   7  -9    2.70    0.54
  11   7  -8    0.84    0.55
  11   7  -6    1.48    0.53
  11   7  -5    1.43    0.53
  11   8 -14    0.55    0.49
  11   9  -2    0.35    0.41
  11   9   0   28.60    0.65
   2   0   2   76.14    0.26
   3   0   0 2529.87    2.36
   4   2  13   24.80    0.39
   5   2  11    3.24    0.37
   6   1 -11   19.97    0.46
   6   2   8   33.95    0.62
   6   4  15   12.04    0.34
   7   3 -21    2.60    0.49
   8   7  15    3.79    0.70
   9   3  -8    2.13    0.71
   9   3  -5    0.80    0.69
   9   4 -17    1.38    0.70
   9   4   3   53.02    0.96
   9   5   7    0.37    0.37
   9   6  10    1.66    0.78
   9   8  12   17.44    0.49
  10   5   0    1.22    0.88
  10   6 -19    2.46    0.78
  10   6   4   51.81    1.16
  10   7 -21    6.57    0.78
  10   7   6   -0.58    0.71
  10   8   8   25.66    0.98
  11   7 -14    1.76    0.85
  11   7 -12    5.50    0.79
  11   7 -11    1.91    0.45
  11   7  -2   -0.12    0.56
  11   8 -15   -0.81    0.66
   2   1  11  543.10    1.10
   4   0  -4    8.01    0.41
   5   1 -16   92.60    0.76
   5   1   6    4.69    0.51
   6   3  13   -0.07    0.43
   7   2   5   17.65    0.81
   8   2 -10    9.84    0.83
   8   2  -9   -0.01    0.66
   8   2  -8   -0.13    0.66
   8   2  -5   -1.29    0.61
   8   2  -4   48.54    0.95
   8   5  12   77.95    1.00
   9   3 -12    7.58    0.92
   9   3  -4    3.46    0.60
   9   3  -3  245.38    1.87
   9   4 -18    7.98    0.82
   9   4   4    2.95    0.67
   9   4   5   12.27    1.13
   9   5 -22    0.42    0.54
   9   7  12  128.67    1.72
  10   5 -17   37.69    1.30
  10   5 -16    5.62    0.95
  10   7   7   35.94    1.24
  10   9   9    2.46    1.01
  11   6  -7    2.96    1.27
  11   6  -5    1.13    1.24
  11   7 -16    1.62    1.11
  11   7  -1  114.18    1.78
  11   7   0   -1.53    1.25
  11   8 -17   -0.23    1.01
  11   8   1   -0.80    0.97
  11   9   3    0.96    1.06
   3   0 -10  182.77    0.56
   3   0   2  162.14    0.57
   4   0  -8 1520.81    1.91
   6   2 -20    1.24    0.30
   6   4  16   -0.42    0.39
   7   2   6    5.82    0.46
   7   3 -22   10.21    0.45
   7   5  16    2.99    0.50
   8   2 -12    7.63    0.52
   8   5  13    5.56    0.61
   9   3 -13   42.83    0.74
   9   3   0    6.62    0.61
   9   4 -19   27.02    0.71
   9   6  11   -0.18    0.01
  10   4 -12    3.20    0.70
  10   4  -5   69.71    1.40
  10   4  -4    1.73    0.59
  10   4  -3    5.41    0.72
  10   5 -18    2.67    0.65
  10   6 -21    8.42    0.67
  10   6   6    0.47    0.56
  10   8   9    1.22    0.90
  10   9  10    0.22    0.58
  11   6 -14    6.83    0.74
  11   6 -12    1.15    0.59
  11   7 -17    1.43    0.66
   4   0   0   -3.07    0.01
   7   1  -7   -0.66    0.01
   7   1  -6   -1.41    0.01
   7   1  -4   -3.86    0.01
   8   2   1   -0.22    0.01
   8   6  15   19.22    0.59
   9   3   1   15.26    0.59
   9   7  13   13.30    0.59
  10   4  -1   -1.51    0.01
  10   5   4   56.21    0.93
  11   8   4    0.65    0.58
   4   5   6    0.30    0.31
   5   8   5   42.49    0.73
   6   5   2    6.49    0.51
   6   8   3  111.84    1.12
   7   1 -10   24.81    0.61
   7   2  -6   27.55    0.66
   7   6   0    0.60    0.61
   7   9   0   -0.54    0.78
   8   2 -11   -0.45    0.59
   8   6  -3    3.38    0.66
   8   8  -3    1.84    0.87
   8  11  -6    1.11    0.94
   8  12  -9    0.09    0.90
   8  13 -13   38.27    1.00
   9   2 -28    4.87    0.67
   9   2 -27  396.03    2.16
   9   2 -26    0.62    0.78
   9   2 -25    8.19    0.81
   9   2 -22   23.64    0.88
   9   2 -20    1.08    0.77
   9   2 -19    1.28    0.64
   9   4 -10    1.65    0.71
   9   7  -7    2.25    1.00
   9   9  -8    6.15    1.06
   9  10  -9    7.41    0.91
   9  11 -12    2.17    0.98
   9  11 -11    2.76    0.81
   9  12 -16    0.92    0.84
   9  12 -15   18.31    0.87
  10   4 -29    1.43    0.76
  10   4 -27    0.64    0.96
  10   4 -26   28.53    1.11
  10   5 -32   10.40    0.95
  10   6 -34    0.48    0.82
  10   7 -35    1.92    0.61
  10   8 -35    4.07    0.60
  10   8 -34    0.13    0.69
  10   8 -13    3.29    0.96
  10   9 -34    0.47    0.54
  10   9 -15    3.10    1.11
  10   9 -14    0.40    0.90
  10  10 -31    0.28    0.64
  10  10 -30    3.17    0.70
  10  10 -18    1.63    1.01
  10  11 -25    1.90    0.65
  10  11 -24    5.90    0.71
  10  11 -23  112.60    1.38
   5   4   3   60.38    0.63
   5   5   4    1.31    0.42
   6   3  -1   19.68    0.56
   6   9   2   22.42    0.80
   6  10   1   17.71    0.88
   7   7   0    4.93    0.73
   7   8   0   12.33    0.79
   7  11  -3   -0.22    0.84
   7  12  -5   -0.37    0.80
   7  14 -13    0.44    0.65
   8   1 -18    4.93    0.60
   8   6  -4    5.07    0.79
   8   7  -3   10.97    0.75
   8  10  -5    5.45    0.83
   8  12 -10   71.00    1.30
   8  13 -14    3.33    0.80
   9   4 -11   -0.21    0.71
   9   5  -9   25.42    0.89
   9   6  -8    8.86    0.85
   9   7  -8    1.48    1.03
   9   9  -9   21.96    1.17
   9  10 -10    2.43    0.90
   9  12 -18   10.41    0.88
   9  12 -17    0.05    0.85
  10   4 -24    3.86    0.85
  10   5 -30    6.43    1.01
  10   7 -34    0.94    0.67
  10   7 -33    1.76    0.82
  10   7 -15    1.68    1.11
  10   8 -14  124.21    1.63
  10   9 -32   22.66    0.89
  10   9 -16    1.96    0.91
  10  10 -29    5.49    0.68
  10  10 -28    0.84    0.82
  10  10 -21    2.56    0.98
  10  10 -20   43.73    1.29
  10  10 -19    0.92    0.88
   6   8   2    0.28    0.63
   7   2  -7    3.12    0.46
   7   9  -1    3.40    0.78
   7  11  -4   -0.15    0.89
   7  12  -6    5.62    0.91
   7  13  -9   -0.28    0.81
   7  14 -15    7.55    0.70
   8   1 -26    2.61    0.62
   8   1 -24    0.05    0.62
   8   1 -23    2.68    0.64
   8   1 -22    1.88    0.62
   8   1 -21    9.60    0.68
   8   1 -20    0.89    0.50
   8   3  -9    2.83    0.57
   8   7  -4  109.81    1.34
   8  11  -8    2.01    1.01
   8  13 -16    0.07    0.73
   8  13 -15   11.43    0.85
   9   3 -31    1.56    0.85
   9   3 -30   33.83    1.01
   9   3 -17    6.54    0.83
   9   3 -16    2.57    0.70
   9   4 -12  106.66    1.27
   9   5 -10    2.29    0.76
   9   6  -9    1.32    0.81
   9   9 -10   -0.25    1.07
   9  10 -11    1.74    0.92
   9  11 -14    0.12    0.96
   9  12 -22   -0.39    0.76
   9  12 -21    0.74    0.78
   9  12 -19   17.15    0.81
  10   5 -29   70.71    1.26
  10   5 -26   18.93    1.17
  10   5 -24    2.28    1.01
  10   5 -22   -0.43    1.04
  10   6 -31    3.46    0.93
  10   6 -30    2.62    0.97
  10   6 -18    0.88    1.15
  10   6 -17    3.61    0.94
  10   7 -31   -0.94    0.89
  10   7 -17   24.80    1.26
  10   7 -16    0.50    0.90
  10   8 -32   11.04    0.79
  10   8 -31   -0.28    0.84
  10   8 -17   69.98    1.55
  10   9 -30    2.47    0.81
  10   9 -29   12.97    0.93
  10   9 -19    3.15    1.12
  10   9 -18   -1.26    0.96
  10  10 -26  107.95    1.40
  10  10 -25    1.06    0.77
  10  10 -24    0.56    0.76
  10  10 -23    1.57    0.79
   4   7   6    1.35    0.37
   5   7   4    4.39    0.50
   6   3  -2   21.17    0.58
   6   4   0    4.82    0.43
   6   5   1    0.48    0.41
   6   9   1    0.16    0.68
   7   3  -5    5.32    0.49
   7   8  -1    2.56    0.65
   7   9  -2    0.47    0.81
   7  14 -16    1.90    0.69
   8   3 -10    2.62    0.68
   8   5  -6    0.50    0.76
   8   6  -5   33.62    0.88
   8   8  -5    0.65    0.92
   8  12 -12    3.96    0.97
   8  13 -18    5.58    0.77
   8  13 -17   -0.28    0.75
   9   3 -19    0.97    0.85
   9   3 -18    6.04    0.72
   9   4 -34    1.38    0.81
   9   4 -14    1.47    0.90
   9   5 -11    1.22    0.76
   9   6 -37    7.91    0.79
   9   6 -10    0.63    0.79
   9   7 -38    1.73    0.64
   9  11 -16    2.87    1.04
   9  12 -25    2.13    0.64
   9  12 -24   33.56    0.88
  10   6 -28    0.69    1.07
  10   6 -19    1.08    0.94
  10   7 -30    0.76    0.93
  10   7 -29    1.48    1.00
  10   7 -18   -1.27    0.91
  10   8 -30    1.97    0.76
  10   8 -28    0.18    0.96
  10   8 -20    4.97    1.19
  10   9 -28    2.61    0.78
  10   9 -27   -0.18    0.79
  10   9 -26   60.87    1.34
  10   9 -25   -0.40    1.04
  10   9 -24    1.84    1.06
  10   9 -23   82.62    1.52
  10   9 -22    1.83    1.07
  10   9 -21   -0.56    0.90
   5   5   3    5.14    0.38
   6  10   0  509.37    2.36
   7   8  -2  109.80    1.29
   7  13 -11   41.97    1.11
   7  14 -17   35.48    0.82
   8   3 -11    0.40    0.70
   8   6  -6    1.62    0.85
   8  11 -10   -0.46    1.00
   8  12 -13    8.50    1.03
   8  13 -23   -0.49    0.69
   8  13 -22   20.85    0.86
   8  13 -21    3.81    0.77
   8  13 -20    0.59    0.75
   8  13 -19   42.73    0.95
   9   3 -26   -2.22    0.87
   9   3 -24    4.75    0.90
   9   3 -21   53.00    1.02
   9   3 -20   -0.19    0.69
   9   5 -35    0.60    0.83
   9   5 -12    0.85    0.76
   9   6 -36   11.34    0.86
   9   7 -37   -0.59    0.71
   9   8 -37    1.47    0.57
   9   9 -36    4.83    0.68
   9  10 -14    7.09    1.18
   9  11 -30    1.29    0.69
   9  11 -17    2.61    0.87
  10   6 -26    3.77    0.95
  10   6 -24    1.41    0.90
  10   7 -28    1.18    0.87
  10   7 -27    0.28    0.90
  10   7 -24    0.05    1.12
  10   7 -23    5.91    1.13
  10   7 -22    0.76    0.94
  10   8 -27    0.85    0.87
  10   8 -26   14.14    0.99
  10   8 -25    0.50    0.88
  10   8 -24    0.64    0.90
  10   8 -21   -0.53    0.98
   6   8   1    1.73    0.53
   6  12  -4    0.72    0.82
   7   1 -14  146.09    1.06
   7   5  -3   14.30    0.63
   7   7  -2   18.25    0.72
   7   9  -3    5.76    0.89
   7  11  -6    3.07    0.95
   7  12  -8    1.60    0.93
   7  13 -12    1.38    0.89
   8   3 -12    1.53    0.70
   8   4  -9   -0.27    0.61
   8   7  -6   -0.13    0.73
   8   8  -6    0.96    0.76
   8  10  -8    6.59    0.91
   8  11 -11    7.84    1.07
   8  12 -15    0.33    0.93
   8  12 -14    1.07    0.95
   9   4 -17    1.61    0.90
   9   4 -16    2.18    0.76
   9   6 -35    4.77    0.88
   9   6 -12  211.08    1.79
   9   8 -36   32.47    0.87
   9   9 -35    8.90    0.70
   9  10 -33    4.91    0.66
   9  10 -32    5.33    0.78
   9  10 -16   -0.17    1.11
   9  11 -29   -0.46    0.66
   9  11 -28    1.47    0.69
   9  11 -27   20.65    0.97
   9  11 -26    0.37    0.88
   9  11 -25    1.08    0.90
   9  11 -23    0.75    0.96
   9  11 -21   28.24    1.19
   9  11 -20    0.88    0.86
   9  11 -19    5.48    0.89
   5   7   3    3.18    0.51
   5   8   3    0.91    0.54
   6   0 -16   -0.10    0.37
   6   9   0   18.60    0.72
   6  10  -1    7.64    0.71
   6  13  -8    0.29    0.82
   7   1 -16   -0.08    0.53
   7   1 -15   12.57    0.52
   7  12  -9    0.63    1.00
   7  13 -13    3.09    0.89
   8   2 -28    5.61    0.78
   8   2 -27    0.41    0.74
   8   2 -20    3.50    0.73
   8   2 -19   10.72    0.77
   8   6  -7   52.91    1.02
   8   7  -7   21.31    1.01
   8   8  -7   69.25    1.21
   8  11 -12    2.24    1.11
   9   4 -29    0.21    0.92
   9   4 -21    2.23    0.94
   9   5 -32   -0.11    0.99
   9   5 -16    5.42    1.05
   9   6 -34    0.46    0.93
   9   7 -35    1.10    0.85
   9   8 -35    2.29    0.68
   9   8 -34    1.23    0.83
   9   8 -14    4.81    1.13
   9   8 -13    6.99    1.00
   9   9 -34    0.17    0.66
   9   9 -33   17.45    0.96
   9  10 -30    4.41    0.87
   4   5   4   60.69    0.63
   5  10   1   -0.18    0.68
   6   3  -4   37.22    0.68
   6   5  -1   14.23    0.63
   6   7   0    0.63    0.63
   6  14 -14    8.72    0.80
   7   9  -4   11.25    0.82
   7  12 -10    5.01    1.04
   7  13 -15    5.74    0.93
   7  13 -14   31.90    0.95
   8   2 -26    3.04    0.64
   8   2 -24    1.36    0.72
   8   4 -11    0.19    0.64
   8   6  -8    1.73    0.74
   8   7  -8   -1.41    0.94
   8   8 -39    0.69    0.65
   8   8  -8    0.80    0.97
   8  10 -10    2.85    0.88
   8  11 -13   45.56    1.33
   8  12 -19    2.13    0.94
   8  12 -18    0.77    0.94
   8  12 -17    1.84    0.81
   9   4 -23    3.16    0.81
   9   5 -31    4.83    1.01
   9   5 -30   -0.36    1.00
   9   6 -33    4.15    0.98
   9   6 -32    1.97    0.97
   9   6 -16    2.33    1.04
   9   7 -34   -1.11    0.76
   9   7 -33   27.99    1.12
   9   8 -33    9.29    1.00
   9   8 -15    6.15    1.14
   9   9 -32    1.43    0.73
   9  10 -29    1.16    0.76
   9  10 -28   -0.38    0.94
   9  10 -27    2.19    1.00
   9  10 -26   -0.41    0.97
   9  10 -22    0.34    1.08
   9  10 -21    9.18    1.21
   9  10 -19    4.56    1.00
   5   8   2  113.64    1.09
   6   1 -11   21.58    0.54
   6   2  -7   22.18    0.57
   6   9  -1    3.11    0.64
   6  14 -16    1.73    0.74
   6  14 -15    1.08    0.73
   7   1 -20    2.25    0.56
   7   2 -12   11.71    0.55
   7   3  -9   30.26    0.76
   7   6  -4   -0.37    0.58
   7   7  -4    0.63    0.75
   7   9  -5  110.01    1.46
   7  13 -17    5.96    0.91
   8   5 -10    0.79    0.68
   8   6 -38    2.87    0.79
   8   7  -9    5.79    1.01
   8  10 -12    4.38    1.10
   8  10 -11    2.73    0.91
   8  11 -14    1.22    0.88
   8  12 -28   30.80    0.89
   8  12 -25   27.09    1.06
   8  12 -24    0.15    0.91
   8  12 -23    9.31    1.00
   8  12 -22  123.05    1.59
   8  12 -21    8.56    0.97
   8  12 -20    0.21    0.78
   9   5 -29    3.39    0.86
   9   5 -28    0.32    1.08
   9   5 -27    4.51    1.10
   9   5 -20    0.37    1.01
   9   6 -31    7.65    1.11
   9   7 -32    5.08    1.01
   9   7 -31    0.34    1.02
   9   8 -32    2.31    0.84
   9   8 -16    4.13    0.97
   9   9 -30   35.70    1.07
   9   9 -29    6.55    1.07
   9   9 -19    9.76    1.23
   9  10 -25    0.31    0.86
   9  10 -24  107.47    1.53
   9  10 -23    4.14    0.95
   5   5   1    6.62    0.48
   5   9   1    3.39    0.66
   6   0 -20    4.63    0.42
   6   3  -5   29.61    0.63
   6   4  -3    0.42    0.44
   6   7  -1    2.77    0.67
   6  10  -3    3.41    0.90
   6  12  -7    7.27    1.01
   6  13 -11    1.93    0.87
   7   1 -25   -0.04    0.58
   7   1 -24    5.98    0.60
   7   1 -22    1.55    0.48
   7   4  -7    0.85    0.52
   7  11  -9    0.36    1.06
   7  12 -12   -0.79    1.00
   7  13 -20   16.84    0.98
   7  13 -19    0.97    0.90
   8   3 -29    1.78    0.83
   8   3 -18   48.35    1.03
   8   4 -34   10.61    0.95
   8   4 -13    0.05    0.67
   8   5 -36    1.55    0.87
   8   6 -37    2.28    0.84
   8   6 -10  248.39    1.82
   8   7 -38    1.33    0.76
   8   7 -10   23.31    1.13
   8   8 -10   20.63    1.13
   8   9 -37   48.52    0.95
   8  11 -32    0.48    0.67
   8  11 -31   20.12    0.94
   8  11 -17    2.05    1.10
   9   5 -26    0.37    0.86
   9   6 -30   51.97    1.26
   9   6 -29    3.16    1.12
   9   6 -28    2.12    1.13
   9   6 -27   88.34    1.54
   9   7 -30   26.52    1.18
   9   7 -19   -0.59    1.17
   9   8 -30   16.89    0.97
   9   8 -29   -0.73    1.06
   9   8 -28    4.87    1.11
   9   8 -19    1.48    0.97
   9   9 -26    0.85    0.96
   9   9 -25    8.09    1.19
   9   9 -24   17.14    1.27
   9   9 -21   11.94    1.09
   5  12  -4   93.84    1.31
   6   1 -12   22.07    0.49
   6   6  -2   -0.09    0.57
   6  11  -5    0.07    0.78
   6  12  -8    1.58    1.00
   6  13 -12   15.55    1.01
   6  14 -21    6.23    0.79
   6  14 -20    0.06    0.74
   6  14 -19    0.68    0.68
   7   2 -14  401.36    1.79
   7   3 -10    2.09    0.51
   7   7  -5   10.44    0.72
   7  11 -10    3.04    1.12
   7  12 -14   18.19    1.17
   7  13 -26    0.64    0.64
   7  13 -25   -0.07    0.66
   7  13 -24    5.61    0.69
   7  13 -23   28.78    0.92
   7  13 -22    6.69    0.79
   7  13 -21    0.42    0.75
   8   3 -28  268.58    1.95
   8   3 -27    4.59    0.88
   8   3 -21    0.99    0.79
   8   3 -20    4.88    0.81
   8   3 -19    4.66    0.66
   8   4 -33   -0.80    0.92
   8   6 -36    3.68    0.87
   8   8 -11    6.90    1.09
   8   9 -36    0.29    0.64
   8   9 -35   -1.42    0.82
   8  10 -34   28.21    0.89
   8  11 -30    4.67    0.76
   8  11 -19   37.01    1.33
   9   6 -26    1.50    0.92
   9   6 -25    7.91    0.98
   9   7 -28    1.34    0.97
   9   7 -27    3.28    0.99
   9   7 -25    5.91    1.22
   9   7 -24   22.99    1.34
   9   7 -22   -0.11    0.98
   9   8 -27    9.14    1.04
   9   8 -24   34.29    1.22
   9   8 -22   10.50    1.07
   5  10  -1   15.88    0.82
   5  13  -8    2.23    0.86
   5  14 -12    5.97    0.71
   6   3  -6  261.56    1.33
   6   4  -4    2.63    0.46
   6   5  -3   20.68    0.61
   6  13 -13    1.31    0.98
   7   8  -6   26.19    0.91
   7   9  -7    5.42    0.84
   7  12 -15    1.55    1.06
   8   3 -24   11.77    0.78
   8   3 -23    2.09    0.70
   8   4 -32    0.33    0.75
   8   4 -31   -0.77    0.98
   8   5 -34    2.12    0.96
   8   6 -35   12.57    1.04
   8   6 -12    0.34    0.78
   8   7 -36    0.59    0.90
   8   9 -13    8.79    1.01
   8  10 -32    0.62    0.88
   8  10 -31   44.17    1.22
   8  10 -15    0.55    0.98
   8  11 -26    0.39    0.86
   8  11 -25   54.70    1.35
   8  11 -24    4.64    1.08
   8  11 -23    2.10    1.09
   8  11 -22   65.67    1.37
   8  11 -21    1.65    0.91
   8  11 -20   -0.38    0.90
   4   6   3    3.04    0.41
   5   5   0    7.98    0.43
   5  12  -5   -0.38    0.85
   5  14 -14    1.00    0.83
   6   3  -7   16.99    0.59
   6   4  -5   36.20    0.74
   6   8  -3    1.46    0.78
   6  10  -5   18.07    1.05
   6  12 -10   -0.16    1.01
   7   7 -40    4.50    0.76
   7   8  -7    1.64    0.75
   7   9 -39    4.40    0.70
   7  10 -37    2.26    0.71
   7  10 -10   -0.19    1.04
   7  12 -30    5.48    0.79
   8   5 -33    0.98    0.98
   8   5 -32    2.97    1.03
   8   6 -34   74.39    1.44
   8   6 -14   -0.52    0.97
   8   9 -33    1.36    0.93
   8  10 -30    3.34    1.02
   8  10 -29    2.81    1.02
   4   5   2    8.24    0.42
   4   7   3    0.53    0.37
   4   9   2    2.52    0.58
   5  14 -16    9.11    0.88
   5  14 -15    0.37    0.81
   6   1 -15   66.71    0.74
   6   5  -4   65.59    0.84
   6   9  -4    2.72    0.71
   6  12 -11    5.70    1.04
   6  13 -16   -0.40    0.98
   7   2 -28   11.06    0.79
   7   2 -26  207.56    1.55
   7   2 -19    4.73    0.65
   7   5  -9    0.14    0.74
   7   6 -39   -0.95    0.81
   7   6  -8    8.72    0.86
   7   7 -39    0.11    0.80
   7   7  -8   20.58    0.97
   7   8 -39    9.02    0.78
   7   8  -8    6.67    0.98
   7   9 -38   74.45    1.19
   7   9  -9    7.66    1.06
   7  10 -36    0.09    0.76
   7  11 -34    0.33    0.63
   7  11 -33    1.75    0.80
   7  11 -14   27.48    1.31
   7  11 -13    1.46    0.91
   7  12 -26    4.54    0.98
   7  12 -25    0.50    0.98
   7  12 -22    6.24    1.05
   7  12 -21    3.51    1.09
   7  12 -20   89.19    1.58
   8   4 -27    7.98    1.00
   8   4 -26    1.40    0.97
   8   4 -25  107.49    1.49
   8   4 -23    1.39    0.93
   8   4 -22   73.40    1.30
   8   4 -21    3.62    0.89
   8   4 -20   -0.32    0.72
   8   5 -16    4.86    0.81
   8   6 -33    4.97    1.06
   8   7 -34   31.06    1.07
   8   7 -33    9.72    1.14
   8   7 -14    1.48    0.87
   8   9 -32    0.88    0.83
   8  10 -27    1.16    0.94
   8  10 -26    2.10    1.12
   8  10 -25   -0.37    1.17
   8  10 -24   10.57    1.25
   8  10 -23    0.21    1.22
   5   2  -6    5.21    0.35
   5   9  -1  190.35    1.44
   5  13 -10    0.77    0.92
   5  14 -18    3.01    0.84
   5  14 -17    0.55    0.82
   6   2 -11    3.44    0.43
   6   4  -6   13.84    0.56
   6   9  -5    1.48    0.89
   6  11  -8    3.05    0.88
   6  13 -28    1.27    0.75
   6  13 -27   38.88    1.04
   6  13 -19    2.83    0.99
   6  13 -18    2.63    1.04
   6  13 -17    2.62    0.88
   7   2 -25    0.35    0.57
   7   3 -15    7.13    0.71
   7   5 -37    0.72    0.87
   7   5 -10    0.59    0.76
   7   6 -38    2.71    0.88
   7   6  -9    4.23    0.85
   7   9 -37    9.03    0.86
   7  10 -12    1.90    1.14
   7  11 -15    4.58    1.18
   7  12 -24    0.99    0.85
   8   5 -30    1.70    0.87
   8   5 -18    4.24    0.82
   8   6 -32    2.55    0.91
   8   6 -17    1.59    1.06
   8   7 -16   -0.06    0.88
   8   8 -32    9.10    0.96
   8   8 -31   12.85    1.21
   8   9 -29   14.15    1.01
   8   9 -28    6.58    1.18
   8   9 -27    0.31    1.17
   8   9 -21    0.68    1.20
   8   9 -20   -0.41    1.22
   4   7   2    0.88    0.45
   4  10   0    7.13    0.71
   4  14 -12    0.08    0.78
   5   6  -1  236.01    1.36
   5   8  -1   34.24    0.83
   5   9  -2    1.68    0.69
   5  12  -7    1.39    0.79
   5  14 -24   -0.95    0.75
   5  14 -23    2.98    0.81
   5  14 -22   13.91    0.90
   5  14 -21    3.27    0.81
   5  14 -20    0.18    0.81
   5  14 -19   46.51    1.06
   6   1 -19    7.07    0.53
   6   1 -18   32.46    0.65
   6   3  -9  451.59    1.79
   6   8 -41    0.80    0.66
   6  10  -7    8.03    1.06
   6  12 -13    0.79    1.13
   6  13 -26    3.11    0.73
   6  13 -25    6.75    0.78
   6  13 -24   41.22    1.14
   6  13 -22    0.61    0.91
   6  13 -21   14.70    0.95
   6  13 -20    0.63    0.82
   7   3 -31    3.61    0.86
   7   5 -36    1.45    0.92
   7   6 -37    0.58    0.90
   7   8 -10   -0.84    1.00
   7   9 -36    4.22    0.91
   7  10 -34    0.30    0.83
   7  11 -31    8.68    0.85
   7  11 -30   -0.03    0.94
   7  11 -29    9.44    1.06
   7  11 -18    0.49    1.13
   7  11 -17   49.56    1.42
   7  11 -16    0.46    1.00
   8   5 -24    0.28    0.99
   8   5 -21   -0.23    0.82
   8   6 -29    5.53    1.11
   8   6 -19    0.42    1.05
   8   6 -18    0.08    0.87
   8   7 -30    2.48    1.00
   8   7 -29    3.59    1.17
   8   8 -29    0.69    0.93
   8   8 -28   27.60    1.34
   8   8 -21    1.33    1.18
   8   8 -19   -0.55    0.96
   8   9 -23    1.85    1.02
   8   9 -22   28.81    1.22
   3   7   4   18.48    0.49
   4   9   1  208.21    1.40
   4  14 -13    0.31    0.84
   5   2  -7    9.88    0.38
   5   5  -2    1.06    0.49
   6   1 -22    0.13    0.52
   6   1 -21  267.82    1.46
   6   2 -13   38.42    0.71
   6   4  -7   38.23    0.69
   6   9 -40    8.03    0.66
   6   9  -6    0.04    0.71
   6  10 -38    4.28    0.72
   6  11 -36   63.06    1.04
   6  11 -10    0.59    0.90
   6  12 -32    0.21    0.65
   7   3 -30    0.71    0.67
   7   5 -35    4.31    0.98
   7   5 -12    1.51    0.80
   7   6 -36    5.04    0.96
   7   7 -37    0.54    0.77
   7   9 -35   40.98    1.17
   7  10 -15   -0.88    1.20
   7  11 -28    0.46    0.85
   7  11 -27   28.91    1.23
   7  11 -24   -1.40    1.13
   7  11 -23   73.34    1.59
   7  11 -22    6.93    1.24
   7  11 -21    4.12    1.27
   7  11 -20   61.94    1.52
   8   6 -27    2.42    0.92
   8   6 -26    1.05    0.93
   8   6 -21    3.56    0.94
   8   7 -28   13.07    1.03
   8   7 -27    5.60    1.00
   8   7 -25    4.26    1.24
   8   7 -24   -0.37    1.20
   8   8 -24    4.76    1.06
   8   8 -23    1.69    1.03
   8   8 -22   73.25    1.45
   4   8   1    1.18    0.54
   4  12  -5   95.24    1.36
   4  13  -8   -0.01    0.87
   5   8  -2    1.77    0.67
   5  12  -9    2.03    1.03
   6   2 -14   52.36    0.78
   6   7 -40    0.14    0.76
   6   8 -40    0.31    0.74
   6   9 -39   48.56    1.06
   6   9  -7    3.70    0.89
   6  11 -35    5.89    0.72
   6  11 -11   -0.90    0.91
   6  12 -31    2.25    0.72
   6  12 -30   63.55    1.25
   6  12 -17    1.88    1.10
   6  12 -16    1.50    1.10
   7   3 -26   51.29    1.07
   7   3 -25    0.89    0.80
   7   3 -21    2.50    0.73
   7   4 -15    0.40    0.72
   7   6 -35   32.27    1.23
   7   7 -36   12.58    0.92
   7   7 -11   55.79    1.10
   7   8 -35    6.92    1.05
   7   8 -12    2.55    1.01
   7   9 -34    0.13    0.79
   7   9 -33    1.68    1.00
   7  10 -31    0.66    0.87
   7  10 -30    0.91    1.06
   4   6   1   81.57    0.76
   4   7   1  367.58    1.60
   4   9   0    0.33    0.60
   4  11  -3   10.78    0.87
   4  14 -16   14.42    0.99
   4  14 -15   -0.10    0.86
   5   4  -4  644.97    1.95
   5   5  -3   15.81    0.59
   5   7  -2    0.47    0.50
   5  13 -30   -0.21    0.72
   5  13 -29    0.84    0.75
   5  13 -16    7.74    1.09
   6   2 -15  114.99    1.01
   6   3 -11   10.57    0.52
   6   8 -39   24.41    0.98
   6   9 -38    3.13    0.81
   6   9  -8    1.01    0.95
   6  10 -36   92.77    1.36
   6  11 -12    6.78    0.95
   6  12 -29    6.95    0.84
   6  12 -28    0.53    0.83
   6  12 -27    1.55    1.01
   6  12 -26    4.71    1.05
   6  12 -20    0.02    1.06
   6  12 -18   20.43    1.10
   7   5 -14  138.41    1.41
   7   7 -35   51.28    1.20
   7   7 -12   28.59    0.97
   7   8 -34   -1.87    1.01
   7   8 -13    0.15    0.87
   7  10 -28    0.68    1.18
   7  10 -27    1.79    1.18
   7  10 -20    6.72    1.30
   7  10 -18    0.76    1.02
   4   5   0    6.53    0.41
   4  12  -6    4.68    0.92
   4  13 -10    5.24    1.00
   4  14 -25    3.28    0.76
   4  14 -19    0.46    0.85
   4  14 -17    8.93    0.82
   5   7  -3   17.62    0.68
   5   8 -42    3.36    0.68
   5  12 -11    1.34    1.06
   5  13 -27    1.25    0.88
   5  13 -26    1.18    0.85
   5  13 -19    3.16    1.01
   5  13 -18    0.78    1.04
   6   2 -17    3.58    0.52
   6   2 -16   16.62    0.53
   6   3 -12    2.63    0.57
   6   6 -39    7.17    0.86
   6   8 -38    1.39    0.86
   6   9 -37   -0.21    0.84
   6   9  -9    5.61    0.98
   6  10 -35   20.24    0.99
   6  12 -25    0.06    0.88
   6  12 -24   18.69    1.01
   6  12 -23   11.81    1.00
   6  12 -22    9.33    0.96
   7   4 -29    5.35    0.77
   7   4 -19   -0.63    0.78
   7   4 -18    3.24    0.65
   7   5 -32   11.57    0.89
   7   5 -31    0.73    1.02
   7   5 -15    1.95    0.70
   7   7 -33    8.92    1.19
   7   8 -33    0.50    0.90
   7   8 -15   -0.32    1.09
   7   9 -31    0.80    0.93
   7   9 -30    5.78    1.16
   7  10 -26   88.92    1.57
   7  10 -24   17.55    1.17
   7  10 -22    5.46    1.07
   7  10 -21    0.80    1.04
   3   7   3   13.18    0.45
   4   6   0    1.50    0.44
   4   7   0    2.51    0.50
   4   8   0    0.73    0.44
   4  11  -4    2.68    0.80
   4  14 -24   12.24    0.77
   4  14 -23   34.97    0.96
   4  14 -21    0.79    0.71
   5   5  -4  116.26    0.99
   5  10 -39   -0.38    0.66
   5  12 -33    0.17    0.75
   5  12 -13    3.10    1.11
   5  12 -12    2.63    0.92
   5  13 -25    4.45    0.78
   5  13 -24    1.54    0.80
   5  13 -22   34.02    1.06
   5  13 -21   -0.97    0.85
   6   5 -37    1.67    0.88
   6   5  -9   38.58    0.85
   6   6 -38    1.30    0.90
   6   7 -38    0.87    0.90
   6   9 -36    7.55    0.96
   6   9 -10    8.93    1.02
   6  10 -34    5.51    0.98
   6  11 -31    0.62    0.82
   6  11 -30   66.35    1.44
   6  11 -16    0.95    1.15
   6  11 -15    4.96    0.97
   7   4 -25   -1.11    0.82
   7   4 -24    1.45    0.85
   7   4 -23  103.78    1.33
   7   4 -22   26.40    0.85
   7   4 -21    3.19    0.69
   7   5 -18    1.75    0.87
   7   6 -31    4.40    1.15
   7   6 -15    0.43    0.74
   7   7 -32   69.24    1.39
   7   7 -31    3.59    1.13
   7   7 -15    2.82    0.82
   7   8 -31    1.40    0.98
   7   8 -16   -0.29    0.88
   7   9 -25    2.01    1.19
   7   9 -21   -1.26    1.20
   7   9 -20    3.15    1.16
   4  13 -13    0.17    0.99
   5   9 -40    6.70    0.68
   5  10 -38    3.57    0.76
   5  11 -36    0.69    0.64
   5  12 -32    0.20    0.69
   5  12 -31    8.85    0.89
   6   2 -26   -1.00    0.61
   6   2 -25    7.65    0.68
   6   2 -20    1.54    0.48
   6   3 -32   -0.15    0.76
   6   4 -11   -0.53    0.49
   6   5 -36   22.33    1.04
   6   6 -37    4.32    0.94
   6   7 -37   -0.93    0.96
   6   8 -37   -1.02    0.79
   6   9 -11    1.08    1.00
   6  11 -29   13.10    0.97
   6  11 -28    2.01    1.03
   6  11 -27    4.15    1.15
   6  11 -20    3.26    1.23
   6  11 -19   -1.06    1.19
   6  11 -17    1.93    0.96
   7   5 -21    1.06    0.91
   7   6 -29   -0.26    1.07
   7   6 -18   11.36    1.02
   7   8 -28    0.73    1.16
   7   8 -27    1.44    1.25
   3  11  -2    1.87    0.70
   3  14 -14    2.71    0.88
   4   4  -2   39.39    0.51
   4   9  -2   10.67    0.69
   4  13 -31    5.86    0.67
   4  13 -30    0.83    0.74
   5   1 -16   80.64    0.75
   5   3  -8    2.50    0.37
   5   4  -6    3.82    0.41
   5   9 -39    0.65    0.76
   5   9  -6    1.45    0.78
   5  11 -35    1.93    0.68
   5  12 -30    1.92    0.76
   5  12 -29    0.08    0.95
   5  12 -16    4.59    1.13
   5  12 -15    1.94    0.92
   6   4 -12  185.10    1.27
   6   5 -35    1.37    0.89
   6   7 -36   -0.68    0.96
   6   7 -10    3.48    0.84
   6   8 -36   36.99    1.07
   6   9 -34   -0.57    0.96
   6  10 -32    7.22    0.92
   6  10 -31    0.81    1.10
   6  11 -26    8.49    1.03
   6  11 -25    1.12    1.00
   6  11 -24    7.66    1.06
   6  11 -23    1.95    1.03
   6  11 -22    0.02    0.97
   6  11 -21    2.11    1.06
   7   5 -24    2.55    0.79
   7   5 -23   90.00    1.28
   7   6 -23    0.53    1.04
   7   6 -21    4.52    0.99
   7   7 -28    7.62    0.99
   7   8 -26   32.34    1.26
   7   8 -25    2.41    1.01
   3  14 -17    2.78    0.93
   4  13 -29   74.98    1.17
   4  13 -28   10.56    0.89
   4  13 -16    5.88    1.07
   5   1 -18   26.72    0.54
   5   2 -12    0.62    0.41
   5   6 -40   27.28    0.97
   5   7 -40   44.13    1.08
   5   8 -39    1.53    0.82
   5   9 -38    1.48    0.84
   5   9  -7   60.48    1.12
   5  10 -36    1.33    0.81
   5  10  -9   -0.99    0.90
   5  11 -33    8.77    0.98
   5  11 -12    1.03    1.10
   5  12 -28   76.09    1.32
   5  12 -27    1.76    0.98
   5  12 -26   -0.30    1.02
   5  12 -19    4.38    1.18
   5  12 -17    6.12    0.93
   6   3 -29    0.81    0.75
   6   3 -17    0.55    0.59
   6   3 -16   17.88    0.60
   6   5 -34    1.44    0.90
   6   5 -11    6.22    0.58
   6   8 -35    0.91    0.81
   6   8 -11    1.83    0.76
   6   9 -33   33.83    1.12
   6   9 -32    1.70    1.05
   6  10 -30   19.46    1.10
   6  10 -29    0.66    1.12
   6  10 -28   14.71    1.21
   6  10 -18   75.82    1.56
   6  10 -17   -0.93    1.11
   3  14 -25    9.15    0.72
   3  14 -18  117.95    1.44
   4   8  -2  349.93    1.66
   4   9  -3   18.48    0.65
   4  12 -34   -0.28    0.61
   4  13 -27   -0.04    0.69
   5  11 -32    0.86    0.81
   5  12 -23    0.95    0.91
   5  12 -21    0.39    0.94
   5  12 -20    9.47    1.02
   6   3 -28    0.49    0.61
   6   3 -18  305.71    1.58
   6   4 -14   13.03    0.60
   6  10 -27  169.03    1.88
   6   1 -29   -0.54    0.73
   7   0  -6    0.15    0.55
   7   1   1 2029.63    3.44
   7   2 -31    0.85    0.74
   8   1 -24    0.27    0.75
   8   2 -29   10.45    0.89
   8   3 -33    0.59    0.95
   8   4 -35    0.47    0.95
   8   5 -37    4.61    0.85
   9   1 -18    5.39    0.86
   9   1 -17    1.01    0.82
   9   1  -9   60.35    1.11
   9   2 -26    0.61    0.88
   9   2  -2    1.22    0.56
   9   3 -30   33.46    1.19
   9   4 -33    4.81    1.04
   9   5 -35   -0.31    0.97
   9   7 -37   -0.14    0.73
  10   2 -19    3.63    0.94
  10   2  -9   12.01    0.84
  10   2  -8  190.65    1.71
  10   3 -27   -0.19    1.17
  10   3  -2   42.05    0.99
  10   4 -30    1.04    0.98
  10   4   1   30.33    0.80
  10   5 -32   10.71    0.99
  10   6 -34   -0.32    0.91
  10   7 -35    1.79    0.82
  11   3 -10    1.56    1.05
  11   4 -26   -0.56    1.21
  11   5 -29    2.03    1.11
  11   5 -28  161.36    1.91
  11   6 -31    1.43    0.98
  11   7 -32    1.66    0.91
  11   8 -32    1.67    0.71
  12   5 -22    4.12    1.26
  12   5 -21   27.50    1.29
  12   5 -20    0.44    1.05
  12   5  -9    8.55    1.19
  12   6 -24    4.01    0.99
  12   6  -6   27.24    1.18
  12   7 -27    7.60    1.03
  12   7  -4    2.88    0.93
  12   8 -28    0.36    0.87
   4  -1 -17   12.46    0.49
   4   0 -26   12.00    0.58
   5  -1 -13  105.80    0.89
   5  -1 -10  151.20    1.02
   7   1   2    4.26    0.42
   7   3 -35   43.41    1.07
   8   1 -26    3.64    0.93
   9   1 -21  115.57    1.46
   9   2  -1    1.48    0.54
   9   3   3    3.79    0.58
   9   4 -34    2.01    0.96
   9   6 -37    7.06    0.87
  10   2  -7   50.02    1.03
  10   2  -6    1.96    0.84
  10   3 -28    2.71    1.10
  10   3  -1   13.06    0.82
  10   4   2    2.10    0.68
  10   5 -33    0.94    0.82
  11   3 -22   54.63    1.49
  11   4 -27   -1.49    1.18
  11   4  -3    3.21    0.92
  11   5 -30   -0.14    1.06
  11   5   0    1.82    0.79
  11   8 -33    1.07    0.65
  12   5 -24   -1.04    1.22
  12   5  -8    0.14    0.87
  12   5  -7    0.44    1.09
  12   6 -27   22.30    1.20
  12   6 -26   -0.51    0.93
  12   6  -5    5.31    0.85
  12   6  -4    2.14    0.94
  12   8 -29   -0.90    0.79
  13   7 -17   72.81    1.42
  13   7 -16   -0.49    0.97
  13   8 -20    3.41    0.90
  13   8 -19   -0.44    0.85
  13   8 -18    0.59    0.77
  13   8 -17    4.43    0.81
  13   8 -16    1.70    0.82
  13   8 -15    0.75    0.77
  13   8 -14    2.33    0.80
  13   8 -13   -0.48    0.85
  13   8 -12    5.26    0.95
  13   9 -19    1.11    0.78
  13   9 -18    0.75    0.67
  13   9 -17    4.26    0.73
  13   9 -16    4.06    0.71
  13   9 -15   -0.73    0.65
  13   9 -13   -0.20    0.73
  13   9 -12   -0.91    0.75
   4  -1 -18   23.66    0.54
   5  -1 -16   86.48    0.85
   6   1 -30  154.49    1.42
   8   1 -27   -0.40    0.88
   8   3 -34   30.87    1.15
   9   1 -23    7.67    1.03
   9   1 -22    0.80    0.84
   9   1  -6   13.61    0.68
   9   2   0  278.72    1.61
   9   3 -32    0.24    1.03
   9   5 -36    4.00    0.76
   9   7 -38    2.14    0.59
  10   2  -5  109.91    1.32
  10   3   0   10.40    0.75
  10   5 -34   -1.59    0.93
  10   6 -35    3.04    0.74
  11   3 -23    5.30    1.06
  11   3  -6   -0.35    0.95
  11   4  -2    5.07    0.88
  11   5 -31    8.88    1.05
  11   7 -33   -0.20    0.72
  12   4 -21   22.51    1.34
  12   4 -19    0.35    1.02
  12   4 -18    6.55    1.12
  12   4 -12   35.01    1.17
  12   4 -10    1.40    1.05
  12   5 -25   -0.10    0.93
  12   5  -6    8.80    1.07
  12   6 -28    1.80    1.04
  12   8 -30   67.72    1.18
  13   7 -21    1.09    0.98
  13   7 -20    3.92    0.86
  13   7 -19    0.18    0.82
  13   7 -14    4.84    0.89
  13   7 -12    1.75    0.96
  13   7 -11   32.38    1.17
  13   8 -23   13.48    0.91
  13   8 -22    0.99    0.84
  13   8 -21    0.07    0.70
  13   8 -10    1.65    0.87
  13   9 -11   21.33    0.81
  13   9 -10    0.74    0.74
   5  -1 -18   23.53    0.57
   6  -1 -15   62.74    0.90
   6  -1 -12   22.11    0.61
   6  -1 -11   21.34    0.66
   6  -1 -10    1.54    0.54
   7   1 -30    2.43    0.80
   7   1   3    1.48    0.39
   8   1 -28   50.32    1.21
   9   1 -25    0.89    0.97
   9   1  -4    0.74    0.66
   9   3 -33    5.76    1.05
   9   5 -37    0.37    0.82
  10   1 -16   -0.27    1.01
  10   1 -15   20.11    1.11
  10   1 -14   37.68    1.20
  10   2  -4   16.25    0.77
  10   3 -30    0.11    1.09
  10   4 -33    4.54    1.02
  10   5 -35  103.89    1.46
  10   6 -36   -0.12    0.80
  10   7 -37    7.51    0.73
  11   2 -13   30.52    1.23
  11   3 -26    1.57    1.20
  11   3 -25  161.78    1.88
  11   3  -5    0.29    0.91
  11   4 -29   -0.23    0.93
  11   4  -1    2.87    0.82
  11   5 -32   -0.76    0.92
  11   6 -33   -0.95    0.75
  11   7 -34   10.24    0.75
  12   4 -23    0.29    1.15
  12   4 -22    2.04    1.00
  12   5 -27   21.50    1.27
  12   5 -26    2.89    0.99
  12   6 -29    1.99    0.98
  12   7 -30    0.54    0.69
  13   6 -20  119.62    1.67
  13   6 -19    3.45    0.94
  13   6 -18   -0.19    0.86
  13   6 -15    0.43    0.86
  13   6 -13    0.91    1.04
  13   6 -12    1.30    1.08
  13   7 -23   21.46    1.08
  13   7 -22    2.17    0.85
  13   7 -10    0.43    0.81
  13   7  -9   -0.87    0.91
  13   8 -24    1.83    0.69
  13   8  -9   -0.36    0.70
  13   8  -8    2.52    0.81
  13   9  -9    0.35    0.61
   6  -1 -18   31.96    0.78
   8   0  -6    5.45    0.55
   8   1 -29    5.56    0.91
   8   3 -35   10.44    0.95
   9   1 -26    0.50    1.00
   9   1  -3    8.70    0.71
   9   4 -36  111.17    1.47
  10   1 -20   28.06    1.24
  10   1 -18    3.37    0.89
  10   1 -17    3.38    0.88
  10   1 -12   24.55    0.95
  10   1 -11  118.54    1.39
  10   1 -10    6.79    0.95
  10   2 -27    1.48    1.09
  10   2  -3  137.82    1.32
  10   3   1   16.77    0.77
  11   2 -10    9.56    1.06
  11   3 -27    1.52    1.18
  11   3  -4   16.37    0.99
  11   4 -30    3.51    0.89
  11   6 -34   86.75    1.35
  11   7 -35    0.19    0.71
  12   3 -17    2.90    1.21
  12   3 -16   -0.46    1.16
  12   3 -15    6.51    1.19
  12   4 -25    3.73    1.26
  12   4 -24   29.88    1.20
  12   5 -28    0.32    0.90
  12   6 -30   10.73    0.97
  12   7 -31    3.88    0.70
  13   5 -16    1.78    1.07
  13   6 -23    3.28    1.05
  13   6 -22    3.17    0.85
  13   6 -11   39.73    1.14
  13   6 -10    1.43    0.99
  13   6  -9    2.48    1.00
  13   7 -25   -0.72    0.86
  13   7  -7    1.04    0.84
   6  -1 -19    8.22    0.56
   7  -1 -15   13.32    0.77
   7   1 -31    0.92    0.83
   8   1   1    0.33    0.40
   8   3 -36   -0.03    0.84
   9   0 -16   48.36    1.06
   9   3 -34    1.67    0.85
   9   5 -38    0.38    0.77
  10   1 -22   12.42    1.19
  10   1 -21   -0.68    0.91
  10   1  -9   -0.32    0.72
  10   1  -8    1.72    0.87
  10   2  -2  357.81    1.98
  10   3   2    0.58    0.65
  10   4 -34   -0.81    0.76
  10   5 -36    0.96    0.86
  10   6 -37   -0.87    0.70
  11   2 -22  140.97    1.76
  11   2  -9    0.11    0.79
  11   3 -28   16.56    1.05
  11   3  -3   -0.24    0.84
  11   4 -31    4.01    0.90
  11   4   0   24.75    0.90
  11   5 -33    4.38    0.80
  11   6 -35    4.03    0.77
  12   3 -21    4.57    1.25
  12   3 -19   -0.85    1.01
  12   3 -18    0.89    1.03
  12   3 -14   -0.40    0.97
  12   3 -12    1.54    0.93
  12   3 -11    3.22    1.13
  12   5 -29   12.37    0.96
  12   6 -31    5.64    0.87
  12   7 -32    0.44    0.73
  13   5 -22    3.78    1.13
  13   5 -21   -0.45    1.11
  13   5 -20    1.06    0.91
  13   5 -19    1.81    0.92
  13   5 -14   61.50    1.34
  13   5 -12    4.23    1.16
  13   6 -25    0.91    0.99
  13   7 -27    1.07    0.80
  13   7 -26    2.16    0.70
  13   7  -6   -0.70    0.83
  13   8 -27    1.30    0.61
   6  -1 -21  252.13    1.52
   6   0 -28   -0.37    0.55
   7  -1 -16   -0.48    0.58
   7  -1 -10   24.29    0.66
   7  -1  -9    2.01    0.64
   7   1 -32   18.52    0.90
   8   1 -30    1.03    0.75
   8   2 -34   13.93    0.99
   9   0 -20    2.32    0.82
   9   1  -1   -0.52    0.60
   9   2 -32    1.51    1.03
   9   4 -37    6.66    0.91
  10   1  -7   15.17    0.80
  10   1  -6    2.12    0.82
  10   3 -33    9.02    1.06
  10   4 -35    1.14    0.96
  11   2  -7    6.74    0.81
  11   2  -6    1.11    0.90
  11   3 -29    2.02    0.96
  11   4 -32    3.37    0.85
  11   5 -34   11.02    0.95
  12   3 -22    1.11    1.05
  12   3 -10    0.12    0.92
  12   4 -28    5.28    1.15
  12   5 -30    9.44    0.89
  12   5  -2    1.60    0.82
  12   7 -33   64.96    1.14
  13   5 -24    1.57    1.07
  13   5 -23    4.48    0.91
  13   5 -10    4.54    1.06
  13   6 -27   -0.54    0.91
  13   6 -26   35.97    1.05
  13   6  -7    0.38    0.89
  13   7 -28   -0.02    0.79
   4  -1 -23  195.39    1.19
   5  -1 -23    2.86    0.46
   6  -1 -22    1.00    0.54
   7  -1 -20    1.71    0.61
   7  -1  -7    5.71    0.62
   7   0 -28    3.30    0.82
   9   0 -22    1.73    0.84
  10   1  -5   92.18    1.25
  10   5 -37    1.11    0.75
  10   6 -38    2.75    0.63
  11   2  -5    7.07    0.95
  11   3 -30    0.72    0.90
  11   4 -33   -0.23    0.96
  11   5 -35   -1.64    0.81
  11   6 -36    3.43    0.73
  12   3 -25    2.27    1.19
  12   4 -29    1.12    1.04
  12   5 -31    1.51    0.77
  12   6 -33    4.91    0.84
  13   4 -21    2.42    1.18
  13   4 -20    5.08    1.21
  13   4 -19    3.44    1.05
  13   4 -18    0.12    1.00
  13   4 -17   16.72    1.07
  13   4 -15    0.68    0.97
  13   4 -14   28.39    1.18
  13   4 -13    1.38    1.15
  13   4 -12    1.21    1.04
  13   5 -25    1.41    0.85
  13   6 -28    1.42    0.92
  13   6  -6   -0.05    0.73
  13   6  -5    4.85    0.88
  13   7 -29    5.37    0.78
  14   8 -19    1.40    0.71
  14   8 -18   -0.01    0.70
  14   8 -17   -0.32    0.70
  14   8 -15    1.55    0.71
   7  -1 -21   15.17    0.71
   7  -1  -6    7.36    0.62
   7   1   5    0.53    0.34
   8  -1 -18    5.38    0.87
   8  -1 -16  182.08    1.52
   8   2 -35   -1.01    0.90
   9   0 -24    2.96    0.84
   9   3 -36   31.95    1.11
  10   1 -27    3.36    1.16
  10   2 -31   -1.57    0.88
  10   3 -34    3.17    0.97
  10   4 -36    2.92    0.76
  10   5 -38    5.02    0.75
  11   1 -15    2.04    0.95
  11   1 -14    0.42    0.93
  11   1 -13    8.89    0.96
  11   1 -12    3.66    1.06
  11   2 -27    0.60    0.97
  11   2  -4   17.35    1.00
  11   3 -31    5.92    0.90
  11   3   0    2.85    0.78
  11   4 -34   19.40    1.07
  12   2 -20    4.37    1.27
  12   2 -17   14.56    1.19
  12   2 -15   31.30    1.21
  12   4 -30    4.05    1.03
  12   5 -32    1.05    0.71
  12   6 -34   -0.24    0.72
  13   4 -24    1.80    1.09
  13   4 -22    2.84    1.02
  13   4 -11    1.31    0.98
  13   4 -10    0.80    1.10
  13   5 -27    0.87    0.99
  13   5  -7   -0.35    0.79
  13   5  -6    0.92    0.94
  13   6 -29    0.96    0.85
  14   7 -21    0.75    0.79
  14   7 -20   -0.49    0.80
  14   7 -19   33.34    0.98
  14   7 -18   -0.62    0.72
  14   7 -17    0.75    0.70
  14   7 -16   21.57    0.86
  14   7 -15    1.17    0.79
  14   7 -14   -0.15    0.83
  14   7 -13    9.41    0.88
  14   8 -14    0.63    0.62
  14   8 -12    1.38    0.69
   7  -1 -23  252.90    1.70
   8   0 -28   75.27    1.30
   9   1 -31    3.59    1.06
   9   2 -34    6.18    1.01
  10   0 -18   34.91    1.12
  10   0 -14   26.48    1.01
  10   0 -10    6.33    0.95
  10   1 -28    1.11    1.12
  10   2 -32   39.15    1.31
  10   2   1   47.53    0.94
  10   3 -35   42.33    1.23
  10   4 -37    0.65    0.85
  11   1 -23    0.65    1.28
  11   1 -22  438.94    2.79
  11   1  -9    7.94    1.05
  11   2 -29    2.55    1.18
  11   3 -32    1.01    0.90
  11   5 -36   -1.54    0.68
  12   2 -22   11.23    1.12
  12   3 -28    3.03    1.09
  12   4 -31    1.32    0.83
  12   4  -2   -1.07    0.74
  12   5 -33   32.46    1.06
  13   3 -17  139.18    1.94
  13   4 -25   -0.48    0.92
  13   4  -9    1.38    0.92
  13   4  -8    4.81    1.04
  13   5 -28    0.54    0.80
  13   6 -30    0.52    0.67
  14   6 -21    1.97    0.91
  14   6 -20    0.65    0.87
  14   6 -19    4.94    0.78
  14   6 -18    0.89    0.79
  14   6 -17    0.33    0.79
  14   6 -16   17.27    0.92
  14   6 -13    2.12    0.90
  14   7 -24   -0.68    0.72
  14   7 -23    3.91    0.78
  14   7 -22   11.25    0.74
  14   7 -12    1.64    0.69
  14   7 -11    2.21    0.81
  14   8 -11    2.61    0.69
   7  -1 -25   -0.30    0.76
   7  -1 -24    5.28    0.68
   7   0 -30    9.62    0.74
   7   0   2    1.22    0.43
   7   1   6    5.65    0.42
   8  -1 -21   10.36    0.79
   8  -1  -7  386.21    1.94
   8   0   0    4.81    0.57
   9   2 -35    1.87    0.98
   9   3 -37    6.84    0.88
  10   0 -22    6.38    1.00
  10   1  -2   32.98    0.95
  10   2 -33    3.99    1.08
  10   2   2    1.38    0.67
  11   1  -8    8.32    0.87
  11   1  -7   19.10    1.08
  11   2 -30   -0.07    1.16
  11   3 -33    4.21    1.02
  11   3   1   -0.14    0.74
  11   4 -35    0.77    0.76
  12   3 -29    4.21    0.91
  12   5 -34   -0.10    0.83
  13   3 -22   -0.91    1.24
  13   3 -21    0.16    1.23
  13   3 -20    5.05    1.04
  13   3 -19    5.58    1.09
  13   3 -18    1.94    1.08
  13   3 -15    1.84    1.03
  13   3 -14   20.17    1.09
  13   3 -13   -0.19    1.12
  13   4 -26   29.64    1.14
  13   4  -7    1.17    1.09
  13   5 -30   -0.62    0.85
  13   5 -29   16.59    0.93
  13   5  -4    2.39    0.89
  13   6 -31    0.39    0.63
  14   5 -20    2.34    1.00
  14   5 -18    0.84    1.02
  14   5 -16   12.32    1.11
  14   5 -15    4.96    1.03
  14   6 -24    1.76    0.88
  14   6 -23    2.93    0.77
  14   6 -12    0.82    0.75
  14   6 -11    0.82    0.93
  14   7  -9    1.38    0.75
   5  -2 -15    3.11    0.57
   5  -2 -14   17.04    0.56
   5  -2 -12    0.17    0.42
   8  -1 -23    3.36    0.76
   8  -1  -6    0.73    0.56
   8   0 -30    8.00    0.97
   8   1 -34    3.36    0.94
   9  -1 -16    4.91    0.83
   9  -1 -14    2.01    0.77
   9  -1 -11    3.10    0.88
   9   1 -32   -0.21    0.82
   9   1   2    5.47    0.62
  10   2 -34    2.53    1.02
  10   3 -36    1.80    0.90
  10   4 -38  133.53    1.52
  11   1 -26    2.29    1.03
  11   2 -31    1.70    1.09
  11   2  -1   -0.72    0.80
  11   3 -34    0.82    1.00
  11   4 -36   -0.15    0.84
  13   3 -24    0.93    1.18
  13   3 -10    5.07    1.21
  13   4 -28    1.39    0.87
  13   4  -6    7.61    1.07
  14   5 -23    5.68    1.03
  14   5 -14    2.30    0.87
  14   5 -13  162.61    1.81
  14   5 -12    0.64    0.99
  14   6 -26   -0.69    0.78
  14   6 -25   -0.52    0.69
  14   6 -10    1.27    0.85
  14   6  -9    0.09    0.86
   5  -2 -18    1.18    0.59
   5  -2 -17   16.17    0.58
   6  -2 -17    1.83    0.67
   6  -2 -16   15.64    0.64
   6  -2 -14   49.48    0.82
   6  -2 -13   35.90    0.75
   6  -2 -11    2.84    0.53
   6  -1 -27    3.37    0.59
   7  -1 -27    2.28    0.81
   8   1   5  331.17    1.50
   9  -1 -21  118.91    1.52
   9  -1 -10    1.54    0.72
   9  -1  -9   62.86    1.18
   9   0  -2   30.23    0.76
   9   1 -33   82.35    1.45
   9   2 -36   22.89    1.09
  10   0  -6    8.33    0.76
  10   1 -31   -0.43    1.09
  10   3 -37    2.32    0.89
  11   1  -5    2.83    0.81
  11   5 -38    0.02    0.69
  12   1 -21  149.84    2.01
  12   1 -19    0.91    1.05
  12   1 -17    1.61    1.05
  12   1 -16   -0.32    1.04
  12   2 -27  145.01    1.84
  12   3 -31    1.70    0.88
  12   4 -34    0.93    0.89
  13   3 -25    0.15    0.99
  13   3  -9    7.17    0.97
  13   3  -8   15.28    1.20
  13   4 -30    1.06    0.94
  13   5 -32    0.70    0.78
  14   4 -20    0.54    1.05
  14   4 -19    1.50    1.10
  14   4 -18    3.44    1.12
  14   4 -15    0.76    1.05
  14   5 -25   14.63    1.02
  14   5 -24    0.44    0.78
  14   6  -8    2.30    0.85
   5  -2 -20    2.75    0.60
   5  -2  -7    9.07    0.48
   6  -2 -20    1.48    0.68
   6  -2  -8    2.51    0.57
   6  -1 -28    1.85    0.70
   7  -2 -18    0.44    0.76
   7  -2 -12   13.42    0.80
   8  -1 -26    1.89    0.91
   8   1 -35    4.05    0.95
   9  -1 -23    7.29    0.91
   9   1 -34    8.71    1.07
   9   1   3   54.68    0.86
  10   1   0   54.78    0.93
  10   2 -35  302.97    2.30
  11   2 -33    2.61    1.06
  11   2   0    1.17    0.81
  11   3 -35    3.20    0.78
  11   4 -37    0.35    0.66
  12   1 -23    0.08    1.26
  12   1 -22    5.20    1.08
  12   2 -29    0.17    1.07
  12   5 -36    2.11    0.71
  13   2 -21    7.70    1.32
  13   2 -20   96.33    1.70
  13   2 -19    1.87    1.06
  13   2 -17   99.48    1.65
  13   2 -15    0.67    1.02
  13   3 -28    0.70    1.06
  13   3 -27    0.76    0.90
  13   4 -31    3.47    0.90
  13   4  -4    1.31    0.97
  14   4 -22   19.12    1.04
  14   4 -21   -0.05    0.90
  14   4 -14    2.40    0.89
  14   4 -13    2.07    1.07
  14   5 -26    0.67    0.73
  14   5  -9    0.37    0.90
   5  -2 -21    0.51    0.59
   5  -2  -6    5.56    0.44
   6  -1 -29   -0.18    0.71
   7  -2 -19    5.02    0.68
   7  -1 -28    6.55    0.71
   7  -1  -1    6.58    0.46
   8  -1 -27    0.12    0.77
   9  -1 -25    0.76    1.07
   9  -1 -24    6.07    0.90
   9  -1  -6   12.66    0.86
   9   2 -37    0.88    0.75
  10  -1 -20   27.99    1.30
  10  -1 -18    5.62    0.96
  10  -1 -17    3.19    0.93
  10  -1 -16   -0.88    0.89
  10  -1 -15   18.82    1.01
  10  -1 -14   42.22    1.14
  10  -1 -13   19.40    1.14
  10  -1 -12   24.48    1.19
  10   0 -28    3.90    0.96
  10   1 -33   -0.21    1.09
  10   1   1   75.32    1.09
  10   2 -36   -0.64    0.90
  10   3 -38  117.83    1.49
  11   0 -24   -0.34    1.29
  11   0 -10  132.55    1.60
  11   1 -30   -0.03    1.15
  11   1  -3    1.35    0.88
  11   2   1    1.47    0.78
  11   4 -38    7.70    0.79
  12   2 -30  100.46    1.58
  12   3 -33    4.05    0.83
  13   2 -24    1.75    1.23
  13   2 -12    2.33    0.98
  13   3 -29   19.25    1.19
  13   4 -32    2.30    0.85
  13   4  -3    0.87    0.92
  13   5 -33    0.04    0.65
  14   4 -25    1.61    0.97
  14   4 -24    2.20    0.91
  14   4 -11   -1.01    1.01
  14   4 -10  168.97    1.87
  14   5  -8    0.75    0.81
  14   5  -7   57.38    1.23
   5  -2  -5    1.18    0.42
   7  -2  -8 1065.42    2.98
   7  -1 -29   53.79    1.11
   7  -1   0    0.73    0.51
   8  -2 -19    7.90    0.98
   8  -2 -16  182.43    1.60
   8  -2 -11   -0.80    0.77
   9  -1 -26    2.73    0.89
   9   0 -32    0.75    1.04
   9   1 -35    1.69    0.95
   9   1   4    4.34    0.58
  10  -1 -22   11.18    1.24
  10  -1 -21   -0.36    0.98
  10  -1 -11  123.56    1.50
  11   0  -8    9.39    0.90
  11   1 -31  207.01    2.12
  11   1  -2   11.83    0.95
  11   2 -34   62.21    1.28
  11   3 -37  148.30    1.62
  12   3 -34    2.81    0.92
  12   4 -36   43.03    1.04
  13   3  -5   69.30    1.42
  14   3 -22   18.74    1.26
  14   3 -20    5.32    1.00
  14   3 -19  122.39    1.71
  14   3 -18    2.85    0.94
  14   3 -16   44.46    1.29
  14   3 -15    0.82    1.13
  14   3 -14    4.42    1.16
  14   4 -27   -1.24    0.91
  14   4  -9    0.47    1.04
  14   5 -29    0.53    0.67
  15   6 -18   49.36    1.10
  15   6 -17    3.69    0.78
  15   6 -16    0.51    0.74
   6  -1 -30  153.61    1.43
   7  -2  -7    3.78    0.56
   7  -2  -6   29.00    0.79
   7  -1 -30    3.76    0.87
   8  -2 -20    2.89    0.78
   8  -2  -9   -0.91    0.77
   8  -1 -29    4.38    0.96
   9  -1 -27   28.50    1.10
   9  -1  -4    0.61    0.60
  10  -1  -9    0.13    0.80
  10   0 -30   -0.78    0.93
  10   0  -2  148.06    1.39
  10   2 -37    2.90    0.91
  11   1 -32    4.74    1.19
  11   2 -35    1.04    0.95
  11   2   2   11.34    0.81
  12   3 -35   -0.02    0.84
  13   1 -15    2.14    1.23
  13   2  -8    3.89    0.95
  13   2  -7    1.91    1.12
  13   3  -4    5.41    1.00
  14   3 -11   -1.40    1.07
  14   4 -28    3.92    0.77
  14   5 -30   -0.99    0.64
  15   5 -19    0.46    0.84
  15   5 -17    1.35    0.84
  15   6 -14   15.72    0.85
   6  -2 -25    6.75    0.73
   7  -2 -25    1.37    0.80
   7  -2  -5   40.84    0.83
   7  -1 -31    0.48    0.80
   7  -1   1 1963.07    3.53
   8  -2 -22    4.84    0.80
   8  -2  -8    0.79    0.63
   8  -1 -30    1.15    0.98
   8   0 -34  242.18    1.95
   9  -2 -19    1.80    1.07
   9  -2 -16    0.99    0.85
   9  -2 -14    4.21    0.96
   9  -2 -12   44.55    1.17
   9  -1  -3    8.43    0.73
  10  -1  -7   16.74    0.86
  10   1 -35    8.14    1.05
  11  -1 -14   -0.78    1.19
  11   0 -28   14.11    1.09
  11   1 -33    0.49    1.08
  11   3 -38    2.64    0.81
  12   1 -30   33.07    1.34
  12   1 -29    0.84    0.98
  13   1 -23  248.76    2.46
  13   1 -21    7.30    1.12
  13   1 -13    2.31    1.01
  13   2 -29  161.71    1.91
  13   2  -6   -0.34    1.07
  14   3 -27    0.35    0.99
  14   3 -26    1.74    0.87
  14   4 -30   -0.11    0.77
  14   4  -6    1.48    0.90
  15   5 -23    0.19    0.76
  15   5 -22    1.47    0.67
  15   5 -21    2.19    0.72
  15   5 -20    9.89    0.78
  15   5 -16    1.48    0.71
  15   5 -14    0.73    0.82
   6  -2 -26   -1.12    0.70
   7  -2 -26  198.66    1.69
   7  -2  -4   85.39    0.99
   8  -2 -24   -0.02    0.75
   9  -2 -22   21.06    1.20
   9  -2 -21   61.59    1.27
   9  -2 -20   -0.34    0.87
   9   0 -34    0.45    1.00
  10  -1 -27    0.82    1.13
  10  -1  -6    2.27    0.75
  10  -1  -5   94.34    1.33
  10   0 -32  118.31    1.62
  10   1 -36    0.65    0.90
  11  -1 -23    1.57    1.26
  11   0 -30    0.32    1.12
  11   0  -4   28.63    0.96
  11   1 -34  150.73    1.78
  11   1   0    7.44    0.73
  13   1 -25   13.31    1.31
  13   1 -10   -0.57    1.16
  14   2 -23    0.32    1.09
  14   2 -22  128.74    1.84
  14   2 -21    1.18    1.00
  14   2 -20    0.67    0.95
  14   2 -18    1.19    0.94
  14   2 -16   26.44    1.19
  14   2 -15    1.02    1.16
  14   3 -28   26.95    1.11
  14   3  -8    0.14    1.04
  15   4 -20    8.05    0.95
  15   4 -19   -0.22    0.91
  15   4 -18   69.71    1.34
  15   4 -16    4.96    0.92
  15   5 -13    1.85    0.68
   7  -1   2    4.27    0.41
   8  -2 -26    2.98    0.96
   8  -2  -5   -0.08    0.68
   8  -1   1   -0.24    0.55
   9  -2  -9  139.78    1.43
   9  -2  -8    1.60    0.87
   9  -1  -1   -0.83    0.67
  10  -1 -28    2.09    0.93
  10  -1  -4    7.16    0.87
  11  -1 -25  151.54    1.98
  11  -1  -9   10.53    1.13
  11   2 -37   37.28    1.06
  12   1 -32    0.51    1.00
  12   2 -35    0.87    0.86
  13   1 -27    3.78    1.15
  13   1  -8    6.70    1.14
  13   2 -31    1.06    0.79
  13   3 -34    0.89    0.78
  14   2 -25    0.40    1.04
  14   2 -24    5.88    0.94
  14   2 -13    4.16    0.98
  14   2 -12    0.63    1.07
  14   2 -11   -0.12    1.11
  15   4 -24   14.38    0.89
  15   4 -23    0.95    0.69
  15   4 -22    0.04    0.70
  15   4 -15    8.33    0.83
  15   4 -14    0.93    0.83
  15   4 -13    3.11    0.87
  15   5 -11   -0.08    0.66
  15   5 -10    0.56    0.71
   5  -2 -27    2.00    0.59
   6  -3 -17    0.59    0.68
   6  -3 -16   15.93    0.80
   6  -3 -13   12.78    0.75
   7  -2 -28    9.27    0.84
   8  -2 -27   -0.23    0.91
   9  -2 -25    9.64    1.10
   9  -2  -7    1.14    0.68
   9  -1 -31    2.91    0.83
  10  -2 -18    5.07    0.95
  10  -2 -16   -1.01    0.88
  10  -2 -14  132.47    1.59
  10  -2 -13    3.21    0.88
  10  -1 -29   82.13    1.45
  10  -1  -3   14.93    0.87
  10   1 -37    2.96    0.88
  11  -1  -8    6.54    0.89
  11  -1  -7   17.39    1.05
  11   0  -2  112.68    1.42
  11   1 -35   -0.25    0.79
  12   1 -33   64.61    1.35
  13   0 -18   -0.23    1.28
  13   1 -29   92.66    1.58
  13   1 -28    3.48    0.95
  13   1  -7   -0.05    1.07
  13   2 -32    2.78    0.74
  13   2  -3    3.52    0.95
  13   3 -35   42.53    1.00
  14   2 -27    0.75    0.99
  14   2 -26    0.79    0.86
  14   3 -30    0.44    0.69
  15   3 -20   -1.12    0.84
  15   3 -17    4.55    0.97
  15   4 -25   -0.02    0.64
  15   4 -12  107.28    1.42
  15   4 -11   -0.14    0.80
   5  -3 -18    1.02    0.65
   5  -3 -16   34.98    0.73
   5  -3 -12    5.26    0.49
   6  -3 -12    2.22    0.55
   6  -3 -10   43.73    0.85
   6  -2 -28    9.50    0.63
   6  -2  -1    1.74    0.37
   7  -1   3    0.05    0.35
   8  -2 -28    5.36    0.94
   9  -2 -26    2.32    0.85
   9  -1 -32    0.22    0.96
   9   0 -36   79.85    1.32
   9   0   4   -0.32    0.52
  10  -2 -10   -1.53    0.79
  10  -2  -9    7.96    0.97
  10  -1 -30    1.19    0.90
  10   0   2   56.03    0.94
  11  -1 -28    2.89    1.14
  11   1   2    0.10    0.72
  12  -1 -22    5.96    1.30
  12  -1 -21  148.75    1.95
  12  -1 -17    1.24    1.02
  12  -1 -15   17.92    1.16
  12   0 -30  367.14    2.60
  12   2 -36   63.37    1.12
  13   0 -22    1.78    1.00
  13   0 -14   19.81    1.14
  13   0 -12   14.46    1.23
  13   1 -30    2.23    0.99
  13   1  -6    3.75    1.07
  13   2 -33    0.33    0.72
  14   1 -22  225.60    2.18
  14   1 -21    2.34    1.17
  14   1 -20    3.34    1.10
  14   1 -19    4.16    1.00
  14   1 -17    3.70    1.13
  14   1 -15   -0.05    1.14
  14   2  -9    1.12    0.88
  14   2  -8    2.52    1.05
  15   3 -24    1.45    0.84
  15   3 -22    0.18    0.71
  15   3 -21   64.68    1.21
  15   3 -16    0.86    0.77
  15   3 -14    8.33    0.97
  15   4 -10    2.99    0.83
   4  -3 -12    0.62    0.43
   5  -3 -10    0.54    0.42
   6  -2 -29   -0.82    0.67
   7  -3 -21    2.29    0.78
   7  -3 -20  114.24    1.26
   7  -2 -29   97.63    1.21
   7  -2  -1    3.86    0.44
   8  -3 -20    4.58    0.88
   8  -3 -19    2.91    0.90
   8  -3 -18   39.17    0.98
   8  -3 -14    3.85    0.75
   8  -3 -13  292.97    1.87
   8  -3 -12    0.77    0.82
   8  -2 -29    9.25    0.96
   9  -2  -5    9.46    0.68
   9  -1   1    2.49    0.62
  10  -2  -8  171.57    1.65
  10  -1 -31    0.61    0.83
  10  -1  -2   32.36    0.85
  11  -1 -29   -0.14    1.03
  11  -1  -5    2.80    0.92
  12  -1 -24   41.93    1.42
  12  -1 -23    1.46    1.01
  12   1 -34    0.63    0.74
  12   2 -37   -1.18    0.68
  13   0 -10    1.04    1.05
  13   1 -31   -1.39    0.91
  13   1  -5   13.08    1.06
  13   2  -2    9.43    0.90
  14   1 -25   44.97    1.26
  14   1 -24    3.01    0.99
  14   1 -13    4.27    0.94
  14   1 -12   -0.12    1.07
  14   2 -30    4.99    0.83
  14   2 -29    2.43    0.76
  15   3 -26    3.68    0.78
  15   3 -25    1.08    0.69
  15   3 -13   -0.69    0.72
  15   3 -12   11.59    0.95
  15   4  -9   40.21    0.99
   4  -3 -18    2.67    0.50
   4  -3 -17  203.79    1.29
   6  -3  -7   14.48    0.52
   7  -3 -22   12.37    0.71
   7  -2 -30    4.86    0.77
   7  -1   4  152.59    0.97
   8  -3 -21    0.42    0.70
   8  -3 -11   -0.20    0.63
   8  -3  -9    2.15    0.72
   8  -2 -30   -0.05    0.84
   8  -1 -34    2.20    0.80
   9  -3 -18    5.63    0.97
   9  -3 -17    5.01    1.00
   9  -3 -16    3.02    0.98
   9  -3 -15  702.81    3.03
   9  -3 -14    1.02    0.90
   9  -2  -4    2.66    0.60
  10  -2 -27    0.91    1.03
  10  -2  -7   46.38    1.02
  10  -1 -32   32.34    1.07
  10   0 -36    0.24    0.84
  11  -2 -21    1.03    1.00
  11  -2 -13   28.11    1.07
  11  -2 -12   -0.41    1.07
  11  -1 -30    0.28    1.03
  11   0 -34   82.81    1.33
  11   0   0    1.26    0.61
  11   1 -37   26.33    0.95
  12   0 -32    0.90    0.92
  12   1 -35    1.19    0.80
  13   0  -8  121.53    1.64
  13   2 -35    1.03    0.64
  14   1 -27    2.12    0.90
  14   1 -11   11.08    0.97
  14   1 -10    0.20    1.00
  14   2 -31    5.29    0.78
  14   2  -6    1.02    0.89
  15   2 -21   80.52    1.36
  15   2 -20    4.58    0.88
  15   2 -19    0.42    0.88
  15   2 -18    3.37    0.89
  15   2 -16   -2.02    0.90
  15   3 -11    7.43    0.76
  15   3 -10    4.71    0.84
   4  -3  -9    3.13    0.34
   8  -3 -23    1.34    0.71
   9  -3 -20    0.56    0.82
   9  -3 -19    0.00    0.80
   9  -3 -13   50.38    1.05
   9  -3 -12    4.88    0.73
   9  -1 -34    5.52    0.75
  11  -2 -11    7.41    0.91
  12  -1 -27   85.04    1.47
  13   0 -28    9.55    0.93
  15   2 -24   20.06    0.83
  15   2 -23    1.33    0.72
  15   2 -15    2.69    0.76
  15   2 -14    0.84    0.76
   7   0  18    0.74    0.65
   7   1  20   10.79    0.78
   8  -3   6    5.01    0.60
   9  -3   4    4.73    0.81
   9  -1  14    1.15    0.82
  10  -3   2    1.00    0.90
  10  -3   3   12.74    0.85
  10  -2   9   26.33    1.07
  10   2  19    3.62    1.26
  10   4  21   11.63    1.27
  11  -2   6    3.41    1.10
  11   0  14   37.06    1.35
  11   1  16    0.99    1.28
  11   3  19    3.80    1.08
  11   7  20   27.49    1.12
  12  -2   3   -0.69    1.24
  12   0  12    3.30    1.14
  12   1  14    0.23    1.31
  13  -2  -3    2.59    1.16
  13  -2  -2    8.96    1.02
  13  -1   5    5.68    1.12
  13   5  16    6.93    1.13
  14   2  10    0.03    1.27
  14   3  12    2.16    1.08
  14   4  13    4.62    1.03
  15   2   6   31.34    1.44
  15   6  10    1.53    0.82
  15   7  10    0.20    0.58
  16   1  -8    1.48    0.83
  16   1  -7   -0.51    0.85
  16   1  -5   33.06    1.05
  16   2   0    4.84    1.01
  16   3   3    0.65    0.85
  16   5   5    3.66    0.80
  16   7   5   -0.46    0.57
  17   3 -11    0.66    0.56
  17   3  -9   -0.48    0.59
  17   4  -3    2.10    0.58
   6   2  21  105.24    1.34
   8   1  19   24.24    1.01
   9  -3   3    2.81    0.79
   9  -2   9    0.37    0.83
   9  -1  13    1.18    0.95
   9   0  16    5.93    1.03
   9   3  21  119.77    1.83
  10  -3   1   18.04    1.00
  10  -2   8    0.04    0.83
  10   3  20    1.85    1.06
  10   5  21    0.56    1.13
  10   7  21    2.92    0.97
  11  -3  -5    0.32    0.86
  11  -3  -4   18.18    1.02
  11  -3  -3    0.82    0.75
  11  -2   5   90.97    1.65
  11   4  19   -1.22    1.20
  11   6  20    6.61    0.96
  11   8  19   -0.95    0.84
  12   1  13    1.49    1.31
  12   2  15   20.63    1.53
  12   6  18   30.74    1.29
  13  -2  -7    1.17    1.00
  13  -2  -6   -0.36    1.02
  13  -2  -5   44.91    1.34
  13  -1   3    6.92    1.25
  13  -1   4    1.46    1.06
  13   1  11    0.53    1.11
  13   4  15    5.75    1.35
  13   9  14   -0.24    0.60
  14  -1  -2    0.54    0.95
  14   3  11    4.62    1.32
  14   6  13    0.14    0.94
  14   8  12    1.20    0.71
  14   9  11    5.18    0.57
  15   1   2    9.05    1.33
  15   2   5   -1.01    1.26
  15   3   7    1.51    1.18
  15   5   9   20.98    1.13
  16   1 -10    0.38    0.81
  16   1  -9    0.44    0.82
  16   2  -1   -0.46    0.82
  16   6   5    0.62    0.61
  17   5  -4   -0.11    0.58
   6   1  19   11.90    0.74
   6   3  22    4.07    0.63
   7   1  19   62.63    1.13
   8   0  16   -1.34    0.82
   8   2  20  153.20    1.86
   9   2  19    7.53    1.15
   9   6  22    1.13    0.99
  10  -3  -1   13.00    0.90
  10  -3   0   10.25    0.78
  10  -2   7   37.51    1.10
  10   2  18    1.50    1.25
  10   4  20    1.67    1.19
  11  -1   9    6.79    1.25
  11   0  12   15.33    1.34
  11   1  15    0.20    1.15
  11   7  19   -0.47    0.96
  12  -2   1    0.90    0.94
  12  -1   6   15.74    1.36
  12   0  10    0.30    1.11
  12   8  17    2.79    0.87
  13  -1   2    4.76    1.32
  13   1  10   16.07    1.25
  13   5  15    0.98    1.20
  14  -1  -6    0.51    1.08
  14  -1  -4   -0.46    0.96
  14   2   9    1.19    1.06
  14   5  12    0.50    1.09
  15   0  -8    1.32    0.98
  15   1   1    0.16    1.21
  15   2   4    1.95    1.29
  15   3   6   13.14    1.27
  15   4   8    0.49    0.93
  15   6   9    6.18    0.79
  16   2  -3    9.30    1.10
  16   3   1    2.70    0.85
  16   4   3   -0.10    0.81
  16   5   4    6.36    0.78
  16   6   4   13.00    0.82
  16   8   3   -0.33    0.34
  16   8   3   -0.08    0.22
  17   4 -13    0.30    0.48
  17   4 -12    0.37    0.50
  17   4  -9   -0.64    0.60
  17   4  -7   -0.37    0.53
  17   5  -6    0.27    0.58
  17   5  -5   -0.59    0.58
   6   2  20    8.23    0.73
   7  -1  13  119.82    1.36
   7   2  20    7.18    0.91
   8  -1  13    4.20    0.71
   8   1  18    2.67    0.80
   8   3  21    1.98    0.83
   9  -3   1   19.04    0.76
   9   1  17    2.34    1.05
   9   4  21    5.30    0.95
  10  -3  -3   35.29    1.03
  10  -3  -2   44.06    1.00
  10  -2   6    7.79    0.84
  10   3  19   91.51    1.62
  11  -2   3    6.05    1.12
  11   1  14    5.73    1.30
  11   4  18   -0.95    1.23
  12   1  12    1.21    1.12
  12   3  15    2.65    1.41
  12   5  17    1.18    0.95
  12   7  17    1.19    0.99
  13   4  14    9.51    1.20
  13   6  15    5.53    0.93
  13   8  14    0.61    0.86
  13   9  13    1.67    0.70
  14  -1  -9   -1.43    0.99
  14  -1  -8    1.72    0.97
  14   2   8    9.78    1.17
  14   3  10    1.90    1.12
  14   4  11   41.94    1.36
  14   8  11   -0.45    0.77
  15   7   8    1.30    0.78
  15   8   7   -0.57    0.61
  15   9   6    0.09    0.49
  16   2  -5    3.83    1.01
  16   2  -4    2.12    0.86
  16   3  -1   -0.48    0.99
  16   3   0    0.28    0.87
  16   4   2    0.25    0.83
  16   5   3    2.01    0.78
  16   7   3   -0.05    0.63
  16   8   2   -0.04    0.50
  17   5  -8    0.32    0.54
  17   6  -6   -0.65    0.50
   6   3  21  203.84    1.75
   7   1  18    1.00    0.65
   8   2  19    4.83    1.02
   9  -3  -1    6.53    0.72
   9  -2   7    4.26    0.71
   9   2  18   50.82    1.41
  10  -3  -4    1.24    0.62
  10   1  15    3.07    1.21
  11  -2   2   10.71    1.08
  11  -1   7    1.73    1.14
  12  -2  -4    4.90    1.03
  12  -1   4    0.90    1.21
  12   1  11    6.05    1.40
  12   9  15    6.24    0.84
  13   1   8    1.57    1.44
  13   7  14    0.78    1.01
  14   0   0    1.78    1.29
  14   4  10    1.18    1.33
  14   5  11    8.82    1.20
  14   7  11   29.71    1.11
  15   1  -2    2.03    1.27
  15   3   5    1.65    1.05
  15   4   6    8.57    1.25
  16   2  -9   -1.61    0.88
  16   2  -7    8.24    1.00
  16   3  -2    1.11    1.01
  16   4   0   -0.02    0.92
  16   4   1    1.35    0.81
  16   5   2    4.72    0.80
  16   7   2    0.79    0.66
  17   5  -9    2.02    0.59
  17   6  -8   -0.06    0.48
  17   6  -7   -0.15    0.45
   7   2  19  306.54    2.19
   8  -2   7    3.38    0.73
   8   3  20   11.75    0.91
   9  -3  -2    1.09    0.56
   9  -2   6  168.61    1.64
   9  -1  10    0.90    0.88
   9   1  16    6.29    0.91
   9   3  19    1.22    1.11
   9   4  20    4.31    0.95
  10   0  12    0.62    1.05
  10   8  19   55.41    1.28
  11  -2   0   -0.38    0.92
  11   0  10    0.66    1.19
  11   1  13    3.30    1.08
  12  -2  -7    2.28    0.91
  12  -2  -5    1.14    0.98
  12   3  14    1.22    1.33
  12   6  16   -0.70    1.21
  13  -1  -2   -0.14    1.18
  13   0   4  142.97    1.97
  13   2  10   45.43    1.46
  13   8  13    4.04    0.93
  13   9  12   -0.05    0.75
  14   0  -2    4.40    1.33
  14   3   8    8.57    1.41
  14   9   9   -0.01    0.64
  15   1  -4    0.92    1.22
  15   1  -3   38.08    1.25
  15   2   1    3.99    1.26
  15   4   5    0.53    1.15
  15   5   6    0.85    1.09
  16   2 -12    0.00    0.80
  16   2 -11   -1.17    0.83
  16   2 -10    0.75    0.75
  16   3  -4    2.64    1.02
  16   3  -3    2.37    0.83
  16   8   0    0.96    0.55
   7   1  17    6.61    0.68
   8  -1  11  252.81    1.91
   8   2  18   13.54    1.05
   9  -2   5    1.27    0.66
  10   2  16   46.98    1.35
  10   4  18    1.59    1.29
  11  -2  -1   -0.62    0.96
  11   1  12    0.60    1.06
  11   2  14   22.24    1.41
  12   2  12   35.83    1.41
  12   8  15    1.02    1.00
  12   9  14    4.34    0.95
  12  10  13   14.04    0.77
  13  -1  -3   10.34    1.02
  13   1   6    0.58    1.40
  13   2   9    3.16    1.14
  13   6  13   21.22    1.30
  13   7  13   39.67    1.32
  14   4   9    0.41    1.09
  14   6  10    0.70    1.07
  14   7  10    2.52    0.97
  15   1  -6    0.37    1.14
  15   8   5   -0.64    0.69
  15   9   4    1.33    0.59
  16   3  -5    2.38    1.02
  16   5   0    1.27    0.75
  16   6   0    2.80    0.84
  16   7   0    1.61    0.71
  16   8  -1   -0.25    0.55
   8   4  20   89.72    1.44
   9   3  18    8.20    0.98
  10  -2   2    0.50    0.71
  10  -1   7    3.36    0.96
  11  -1   5   28.50    1.11
  11   1  11   50.33    1.55
  11   3  15    2.90    1.10
  11   4  16    0.79    1.26
  11   7  17   56.54    1.47
  12   0   6    4.29    1.07
  12   2  11    7.97    1.43
  12   3  13    1.78    1.16
  12   4  14    0.54    1.18
  13  -1  -7   -0.18    1.03
  13  -1  -6    4.12    1.14
  13  -1  -5   12.77    1.02
  13   2   8    0.77    1.44
  13   5  12    1.43    1.35
  13   8  12    0.31    0.97
  13  11   8    0.45    0.48
  14   0  -6    0.42    1.13
  14   4   8   54.05    1.62
  14   6   9    0.20    1.10
  14   7   9    0.11    0.98
  14   9   8    0.38    0.73
  15   1 -12    0.21    0.92
  15   1 -10    0.92    1.00
  15   1  -8    1.37    1.09
  15   2  -1    1.56    1.06
  15   4   4    1.47    1.03
  15   5   5    2.10    0.92
  16   3  -8   15.08    1.06
  16   3  -7    1.44    0.98
  16   4  -4   -0.65    0.94
  16   4  -3    0.22    0.81
  16   5  -2   20.26    1.03
  16   5  -1    3.34    0.81
  16   6  -1    0.51    0.81
  16   8  -2    8.22    0.63
   6   2  18   38.96    0.91
   7   1  16    0.58    0.60
   8  -1   9    2.84    0.71
   8   1  15   11.09    0.91
   9   1  14    1.90    0.96
  10  -2   1   46.55    1.05
  10   0  10    4.92    0.92
  10   3  16  103.27    1.82
  10   4  17    2.94    1.32
  10   5  18    1.04    1.00
  10   6  18   -0.19    1.12
  10   8  18    1.84    0.96
  11  -2  -5    7.18    0.89
  11  -2  -4   17.54    1.00
  11   0   8   73.35    1.48
  11   2  13   -0.85    1.06
  11   5  16    1.09    1.23
  12  -1  -1   -0.57    1.07
  12   3  12   17.71    1.53
  12   8  14    0.47    1.03
  12  10  12   10.62    0.80
  13  -1  -8    7.16    1.06
  13   6  12    1.31    1.01
  13   7  12   -0.75    1.08
  14   4   7    1.31    1.34
  14   5   8   -0.77    1.29
  14   9   7    0.61    0.73
  15   2  -3    1.53    1.17
  15   4   3    9.24    1.10
  16   3 -14    0.05    0.79
  16   3 -13    0.19    0.84
  16   3 -11   15.42    1.00
  16   3  -9    2.09    0.78
  16   4  -5    2.40    0.96
  16   5  -3   -0.24    0.90
  16   7  -2   18.93    0.85
  16   8  -3    0.75    0.59
   6   4  20    4.32    0.73
   8   3  18    0.92    0.84
   8   6  20    3.34    0.97
   9  -2   2   -0.07    0.67
   9  -1   7    2.72    0.80
   9   3  17    6.14    0.96
  11  -2  -6    0.86    0.84
  11  -1   3    1.36    0.89
  11   3  14    0.78    1.08
  11   4  15   -1.03    1.07
  11   9  15    3.86    0.96
  12  -1  -2    3.51    1.10
  12   2  10    6.75    1.17
  12   6  14    0.64    1.03
  12   7  14    1.90    1.16
  12   9  13    9.66    0.96
  12  11  10    1.02    0.59
  13   1   4    0.15    1.12
  13   6  11   -0.36    1.19
  13   9  10    0.39    0.83
  13  10   9    1.54    0.70
  13  11   7   32.66    0.76
  14   7   8    6.55    1.03
  14  10   5   10.88    0.67
  15   2  -5   -0.27    1.24
  15   5   3    2.73    1.14
  15   6   4    2.21    0.88
  15   7   4    1.41    0.80
  15   9   2    3.27    0.63
  16   6  -3    0.12    0.84
   8   1  14    0.77    0.77
   9   0  10    0.17    0.88
   9   1  13    0.64    0.79
   9   2  15    4.31    0.87
   9   5  18    0.30    1.04
  10  -2  -2  361.67    2.26
  10  -1   4   16.25    1.01
  10   5  17    9.05    1.08
  11   1   9    9.63    1.29
  12  -1  -4    0.73    1.06
  12   1   6   14.76    1.35
  12   3  11    3.38    1.18
  12   4  12    4.06    1.40
  12  10  11    1.84    0.88
  13   0  -2    6.76    1.29
  13   1   3    6.91    1.15
  13   3   8   -0.84    1.12
  13   7  11    2.50    0.95
  14   4   6    3.06    1.15
  14   6   7    1.40    1.18
  14   8   7    0.58    0.92
  14   9   6   -0.17    0.80
  15   2  -7    0.89    1.19
  15   2  -6   29.24    1.23
  15   5   2   -0.48    1.14
  15   6   3    1.19    0.89
  15   7   3   17.99    0.92
  15   8   2    0.29    0.81
  15  10  -1    0.91    0.48
  16   4 -16   -0.63    0.76
  16   4 -10    2.90    0.89
  16   4  -9    2.46    0.92
  16   4  -8    2.22    0.84
  16   5  -6   -0.80    0.85
  16   5  -5   29.54    1.01
  16   6  -4    0.55    0.71
  16   7  -4    0.12    0.73
   8   3  17    6.72    0.94
   9  -2   0  279.14    1.89
   9   3  16    2.34    0.91
  10  -2  -4   16.14    0.89
  10   0   8   -0.06    0.82
  10   2  13   51.62    1.33
  10   6  17    5.19    1.02
  10   9  16   11.00    1.01
  11  -1   0    6.19    1.03
  11   2  11    4.67    1.08
  11   9  14    5.49    0.98
  11  10  13    0.40    0.81
  12  -1  -5    2.91    1.03
  12   0   2   10.62    1.05
  12   3  10    9.13    1.46
  12   7  13    5.20    1.06
  12   9  12   55.48    1.27
  12  11   9   45.66    0.93
  13   1   2    4.49    1.14
  13   2   5    0.64    1.15
  13   3   7  116.04    1.87
  13   9   9    0.02    0.92
  13  10   8   -0.48    0.72
  14   1  -4   -0.25    1.08
  14   4   5    2.20    1.08
  14   5   6    1.54    1.09
  14   7   7    2.28    0.91
  14   8   6    0.07    0.90
  15   2  -8    0.45    0.95
  15   3  -3  121.96    1.78
  15   6   2   -1.18    0.86
  15   7   2    0.46    0.95
  16   4 -12    0.43    0.83
  16   4 -11    1.24    0.73
  16   6  -6    0.17    0.84
  16   6  -5   18.27    0.86
  16   7  -5   12.97    0.70
   7   2  16  120.39    1.35
   8   0  10    0.94    0.73
   8   1  13    2.72    0.65
   8   6  19    1.58    0.79
   9  -2  -1    1.21    0.55
   9  -1   5    8.30    0.72
   9   2  14   -0.42    0.81
   9   7  18   46.20    1.17
  10  -2  -5  114.07    1.32
  10   2  12    6.29    1.16
  10   4  15    1.25    1.21
  11  -1  -1   24.47    1.14
  11   1   8    2.11    0.99
  11   2  10    0.23    1.22
  11   3  12   -0.24    1.07
  12  -1  -8   -1.42    0.93
  12  -1  -7   20.52    1.08
  12   1   5    1.90    1.14
  12   4  11   -0.05    1.14
  13   1   0    0.95    1.25
  13   1   1  105.28    1.77
  13   2   4    4.65    1.18
  13   8   9   -1.07    1.01
  14   1  -7   19.70    1.33
  14   1  -6    1.54    1.05
  14   2  -1   -0.57    1.12
  14   5   5    2.35    1.33
  14   6   6    5.29    1.03
  14  11   1   -0.27    0.49
  15   2 -15    1.09    0.89
  15   2 -13    2.20    0.98
  15   5   0    4.02    1.20
  15   8   1    0.38    0.72
  16   5 -18    0.76    0.59
  16   5 -17   78.06    1.09
  16   5 -11    3.94    0.83
  16   5 -10    0.23    0.88
  16   5  -9    2.15    0.79
  16   6  -7    0.14    0.70
  16   7  -7    1.59    0.72
  16   8  -8   31.89    0.79
   7   3  17    0.48    0.64
   8   4  17    6.36    0.98
   9  -1   4    4.57    0.75
   9   2  13    4.19    1.00
   9   3  15  139.93    1.71
   9   4  16    4.49    1.15
   9   8  17    8.40    1.01
  10  -1   2   -0.63    0.71
  10   1   9   13.32    1.12
  10   3  13   64.70    1.53
  10   7  16   10.46    1.17
  11   1   7    1.97    0.99
  11   6  14  187.18    2.19
  11   8  14    7.43    1.00
  12  -1  -9    2.35    0.75
  12   0   0   24.53    1.15
  12   1   4    0.03    1.03
  12   5  11   -0.13    1.38
  12   9  11    0.17    0.95
  12  10  10    0.57    0.86
  12  11   8   -1.31    0.69
  13   3   5    0.35    1.34
  13   4   7   -0.17    1.33
  13   6   9    1.33    1.12
  13   7   9    2.77    1.03
  13   9   8    1.38    0.94
  14   1 -10   -1.76    1.11
  14   1  -9   -0.79    1.14
  14   1  -8    1.21    0.92
  14   2  -2    1.25    1.09
  14   5   4    3.14    1.29
  14   7   5    9.22    1.20
  14   9   4    0.31    0.88
  14  11   0    2.79    0.53
  15   3  -6   26.88    1.22
  15   4  -3    2.14    1.20
  15   5  -1    1.05    1.17
  15   7   0    0.37    0.98
  15   8   0    8.73    0.80
  15   9  -1    1.77    0.60
  15  10  -4    0.72    0.53
  16   5 -15    2.60    0.73
  16   5 -14   -0.55    0.75
  16   5 -13    2.70    0.81
  16   5 -12    2.87    0.72
  16   6 -19    3.03    0.52
  16   6 -18   -0.30    0.60
  16   6 -10   -0.22    0.82
  16   6  -9   -0.95    0.81
  16   7  -8   10.21    0.71
  16   8 -11    0.25    0.54
  16   8 -10    0.53    0.57
  16   8  -9   -0.43    0.51
   6   3  17   -0.07    0.51
   6   4  18   21.38    0.83
   7   2  15    0.74    0.57
   8   2  14    3.89    0.72
   9   6  17    2.66    0.91
  10  -1   1   75.79    1.23
  10   4  14    2.08    0.99
  11  -1  -3    1.30    0.79
  11   5  13    2.18    1.07
  11  10  12    4.76    0.91
  12   3   8    1.14    1.10
  13   0 -12   13.74    1.09
  13   0 -10    0.84    1.04
  13   1  -2   -0.07    1.22
  13   4   6    4.32    1.40
  13   6   8   -0.90    1.29
  13   9   7   18.74    1.10
  13  10   6   -0.16    0.83
  13  11   4   10.59    0.72
  14   1 -12   -0.08    1.03
  14   1 -11   11.61    0.96
  14   2  -4   37.50    1.53
  14   9   3   -0.04    0.86
  15   3  -9  132.21    1.87
  15   3  -8    1.84    1.02
  15   4  -4    2.24    1.04
  15   5  -2    0.65    1.00
  15   7  -1    1.29    0.99
  16   6 -17    6.73    0.64
  16   6 -15    0.13    0.70
  16   6 -14   56.57    1.07
  16   7 -18    0.78    0.48
  16   7 -16    0.58    0.53
  16   7 -15   -0.02    0.58
  16   7 -14   -0.21    0.58
  16   7 -12    1.13    0.68
  16   8 -13    0.28    0.51
   7   3  16    8.09    0.70
   8   1  11  243.87    1.90
   9  -1   2    5.58    0.72
   9   1  10    1.62    0.74
   9   5  16   11.24    0.99
  10  -1   0   54.70    1.09
  10   6  15   26.06    1.18
  10   7  15    1.29    1.18
  11   1   5   30.36    1.32
  11  11  10    0.82    0.81
  12  10   9    0.81    0.78
  12  12   5    0.02    0.57
  13   1  -3   12.24    1.14
  13   2   1   47.50    1.64
  14   2  -6   -0.11    1.26
  14   2  -5    0.90    1.07
  14   5   3   -0.10    1.10
  14   6   3   -0.10    1.21
  14   7   4    0.11    0.97
  14  10   1    1.88    0.74
  14  11  -1    3.80    0.58
  15   3 -17    5.45    0.92
  15   3 -16    2.05    0.91
  15   3 -13   -0.26    1.04
  15   3 -10    5.00    0.99
  15   4  -6   22.04    1.34
  15   7  -2    1.05    1.05
  15   8  -2   -0.25    0.73
  15   9  -3    4.12    0.66
   7   6  18    3.11    0.87
   9   6  16    0.70    1.08
   9   8  16   -0.64    1.01
  10  -1  -2   32.75    1.03
  10   0   4   62.77    1.20
  10   1   7    4.70    1.03
  10   5  14    2.61    1.01
  10   9  14   -0.33    1.00
  10  10  13    5.04    0.98
  11  -1  -7   16.55    0.97
  11   0   0    0.85    1.00
  11   3   9   -0.29    1.20
  11   4  11    1.77    1.09
  12   0  -4   34.57    1.15
  12   4   8    1.42    1.36
  12   5   9   10.95    1.45
  12  10   8    1.50    0.92
  13   1  -5   12.92    1.35
  13   7   7    8.95    1.13
  13   9   6    0.10    0.99
  13  10   5    1.24    0.87
  13  11   3    1.55    0.72
  14   2  -7    1.38    1.30
  14   5   2    1.37    1.13
  14   9   2    3.45    0.78
  14  10   0    0.69    0.74
  14  11  -2   -0.31    0.56
  15   4  -7    0.79    0.97
  15   5  -5    0.67    1.18
  15   7  -3    0.84    1.02
  15   9  -4   -0.08    0.64
  15  10  -7    0.98    0.56
   8   3  14  105.47    1.48
   9   2  11    4.23    0.79
  10  -1  -3   15.11    0.89
  10   4  12    0.77    1.13
  10   5  13   48.45    1.46
  11  -1  -9    8.47    0.86
  11  -1  -8    7.82    0.74
  11   1   4    0.26    0.89
  11   5  11   52.16    1.63
  11   6  12    2.15    1.04
  11   7  12    1.21    1.24
  11  11   9    0.14    0.84
  11  12   7    0.52    0.66
  12   2   3   -0.71    1.28
  12   3   6   25.48    1.29
  12   4   7   -1.36    1.31
  12   8   9    1.51    1.14
  12  11   6   -0.01    0.79
  13   1  -7    1.84    1.13
  13   1  -6    3.59    1.17
  13   7   6   -0.19    1.31
  13   8   6    3.32    1.15
  13  10   4   34.05    1.10
  13  12   0    0.10    0.51
  14   2  -9   -0.72    1.21
  14   6   2    2.82    1.08
  14   9   1    1.08    0.90
  14  11  -3   -0.04    0.56
  15   5  -6    1.82    1.14
  15   8  -4    1.25    0.77
   7   2  13   33.26    0.81
   8   2  12    3.71    0.64
   9   1   8    6.85    0.72
   9   3  12    4.98    1.00
   9   6  15   49.01    1.40
   9   7  15   64.04    1.46
   9   8  15   17.40    1.17
  10  -1  -4    6.66    0.80
  10   2   8    0.88    0.99
  10   3  10   17.29    1.18
  10  11  11    4.10    0.84
  11   0  -2  116.26    1.63
  11   1   3   -0.37    0.86
  11   2   6    3.09    0.99
  11   3   8    4.99    1.06
  11  10  10    2.58    0.98
  12   1  -1    1.17    0.95
  12  10   7    4.17    1.03
  13   1  -9    8.96    1.18
  13   1  -8    6.04    1.21
  13   2  -2    9.33    1.14
  13   4   3    2.35    1.14
  13   9   5    0.89    0.85
  13  11   2    0.72    0.64
  13  12  -1    0.56    0.54
  14   2 -11    0.92    1.12
  14   5   0    0.28    1.11
  14   6   1    0.68    1.08
  14   8   1   -1.39    1.08
  14  10  -1    2.66    0.67
  14  11  -4   14.01    0.67
  15   4 -19   -0.19    0.83
  15   4 -18   69.27    1.30
  15   4 -16    5.10    0.97
  15   4 -14    1.30    1.04
  15   4 -11    0.21    0.96
  15   5  -8    1.97    1.15
  15   5  -7    0.57    0.96
  15   8  -6    4.63    0.89
  15   9  -7    0.83    0.73
  15  10 -10   -0.23    0.54
   6   5  17    0.34    0.64
   8   2  11   14.62    0.82
   8   8  16    1.91    0.96
   9  -1  -1   -0.18    0.54
   9   1   7    3.23    0.85
   9   5  14    0.99    0.90
  10  -1  -6    1.68    0.70
  10  -1  -5   92.10    1.21
  10   5  12    1.37    1.19
  10   7  13   13.82    1.29
  11   1   2    0.27    0.88
  11   3   7    0.17    1.23
  11   4   9    3.07    1.09
  11   7  11  175.38    2.01
  11   9  10    9.54    1.18
  11  11   8   -0.26    0.85
  11  12   6    0.49    0.70
  12   0 -10   12.39    1.02
  12   1  -2    2.73    0.94
  12   3   4    2.83    1.30
  12   5   7   -0.45    1.40
  12   8   8    4.69    1.25
  12  11   5   -0.02    0.83
  12  12   3    7.12    0.70
  13   1 -12    0.35    1.02
  13   1 -10    0.52    1.14
  13   3   0    1.04    1.18
  13   4   2   -1.50    1.33
  13   7   5    0.78    1.09
  13   8   5    0.06    1.00
  13   9   4    2.81    1.07
  13  10   3    1.35    0.88
  13  11   1    2.65    0.77
  14   5  -1    3.08    1.15
  14   6   0    3.20    1.10
  14   8   0    0.97    1.12
  14  10  -2    0.55    0.80
  14  11  -5    1.67    0.59
  15   5  -9   10.75    0.97
  15   6  -7    0.41    0.91
  15   7  -7    3.00    1.03
  15   7  -6   21.25    1.01
  15   8  -7    1.41    0.88
  15   9  -8   -0.62    0.62
  15  10 -13    0.20    0.50
  15  10 -12   17.04    0.65
   7   4  15   36.56    1.02
   8   4  14   82.29    1.28
   9   2   9    0.28    0.88
  10  -1  -7   14.59    0.81
  10   1   4   14.93    1.02
  10   2   7   36.88    1.11
  10   3   9   11.30    1.11
  10  10  11    3.78    1.00
  10  11  10    4.73    0.89
  11   0  -4   27.44    1.11
  11   2   4    7.67    1.19
  11   4   8   91.17    1.80
  11   7  10    4.29    1.29
  11  13   3   -0.70    0.53
  12   0 -12    2.80    0.74
  12   1  -4    0.39    1.08
  12   2   1    0.53    1.01
  12   3   3    5.91    1.36
  12  10   6   33.26    1.22
  12  13  -1    1.30    0.47
  13   1 -13    2.10    0.99
  13   4   1    8.32    1.47
  13   5   3    1.09    1.12
  13   7   4    1.22    1.30
  13   8   4   18.59    1.16
  13   9   3    1.29    1.05
  13  10   2    1.66    0.96
  14   5  -2    0.22    1.18
  14   6  -1    2.24    1.09
  14  11  -6    0.07    0.61
  15   5 -19    1.90    0.86
  15   5 -18   -0.42    0.84
  15   5 -14    1.59    0.99
  15   5 -13    1.65    1.06
  15   5 -12   34.75    1.29
  15   7  -8   -0.69    1.00
  15   8  -9    1.39    0.85
  15   9 -10    0.33    0.72
   9   4  12  132.03    1.63
   9   7  14   12.62    1.01
  10  -1  -9   -0.57    0.68
  10  -1  -8    1.55    0.65
  10   2   6    9.01    1.00
  10   4  10  130.11    1.73
  10   8  12   10.73    1.21
  11   1   0    6.63    1.05
  11   3   6    4.77    1.02
  11  12   5    5.83    0.80
  12   8   7    1.26    1.01
  12   9   6    1.13    1.11
  13   2  -7    1.07    1.19
  13   2  -6    0.23    1.03
  13   4   0    0.69    1.46
  13   5   2   -0.62    1.10
  13   7   3   -2.12    1.26
  13   8   3    1.05    1.26
  14   6  -2   -0.60    1.11
  14   7  -2    0.92    1.19
  14  10  -4   19.31    0.93
  14  11  -7    8.56    0.67
  15   5 -17   -0.33    0.78
  15   5 -16    0.09    0.80
  15   5 -15   49.27    1.15
  15   6 -21   27.91    0.91
  15   6 -12   53.59    1.36
  15   6 -11   -1.03    1.00
  15   7 -23    1.09    0.53
  15   7 -22    0.98    0.67
  15   7 -11    0.11    0.95
  15   8 -22   -0.38    0.56
  15   8 -10    3.15    0.88
  15   9 -13   -0.55    0.65
  15   9 -12   -0.12    0.68
   7   4  14    3.74    0.78
   8   4  13    1.26    0.71
   8   7  15    4.89    0.81
   9   1   5    7.65    0.84
   9   3  10    2.54    0.77
   9   9  13    0.12    0.99
  10   0  -2  145.13    1.58
  10   6  11    2.76    1.21
  10  11   9    3.18    0.94
  11   1  -1   24.80    1.15
  11   2   3    6.95    0.96
  11   3   5    3.68    1.16
  11   5   8   13.94    1.35
  11  13   2   -0.22    0.60
  12   1  -6    0.20    1.03
  12   3   2    2.83    1.13
  12   5   5    0.85    1.16
  12  10   5    2.11    0.90
  12  12   1    0.84    0.73
  12  13  -2    0.06    0.50
  13   2  -8    4.48    1.23
  13   3  -3    1.27    1.10
  13   4  -1    2.51    1.45
  13   9   2    0.30    0.93
  13  11  -1    0.31    0.66
  14   3 -18    3.98    0.98
  14   6  -3    0.89    1.14
  14   7  -3    0.49    1.18
  14   8  -3    1.94    1.14
  14  10  -5    0.22    0.83
  15   6 -20    4.37    0.79
  15   6 -19    2.14    0.84
  15   6 -18   58.65    1.22
  15   6 -13    0.07    0.86
  15   7 -21   13.19    0.74
  15   7 -20    0.34    0.68
  15   7 -14    1.54    0.91
  15   7 -13    0.63    0.93
  15   7 -12    1.34    0.94
  15   8 -21    3.42    0.57
  15   8 -13   -1.22    0.83
  15   9 -18    0.77    0.54
  15   9 -17    0.23    0.57
   8   3  11  485.76    2.60
   9   2   7    3.75    0.85
   9   4  11   56.15    1.21
   9   5  12    1.72    0.89
  10   1   2    0.11    0.71
  10   3   7    5.94    1.09
  10   7  11    0.80    1.23
  10   8  11   16.77    1.30
  10  12   7   -0.36    0.78
  11   0  -8    8.99    0.89
  11   1  -2   12.65    1.09
  11   2   2   11.32    0.97
  11  10   7    0.81    1.09
  11  11   6    4.71    0.98
  11  12   4    0.97    0.82
  12   1  -7   21.46    1.03
  12   6   5    2.88    1.41
  12   9   5   -1.10    1.15
  12  10   4    2.12    1.08
  12  13  -3    1.88    0.55
  13   3  -5   68.38    1.70
  13   3  -4    5.16    1.13
  13   4  -2    5.11    1.45
  13   7   2    0.75    1.14
  14   7  -4    3.54    1.28
  14   9  -5   -0.64    0.98
  14  10  -6    0.89    0.71
  14  11 -10    0.49    0.63
  15   7 -19    0.66    0.74
  15   7 -17   -0.09    0.78
  15   7 -16    1.89    0.87
  15   7 -15    9.85    0.88
  15   8 -18    8.29    0.73
  15   8 -17    0.02    0.71
  15   8 -16   -0.48    0.74
  15   8 -15    2.70    0.68
   7   6  15    0.66    0.67
   8   4  12    2.99    0.72
   8   5  13    6.02    0.91
   8   7  14    0.18    1.00
   8   8  14   16.91    1.09
   9   0   0  103.96    1.22
   9   1   4    5.09    0.66
   9   4  10    8.37    0.99
   9   6  12   11.08    1.17
   9   9  12    1.85    1.08
   9  11  10    0.49    0.90
  10   1   1   74.10    1.29
  10   4   8    3.22    1.12
  10   5   9    4.24    1.15
  10   6  10  252.23    2.38
  10  10   9   -0.60    1.09
  10  11   8    2.89    0.99
  10  13   4   -0.48    0.66
  11   1  -3    1.58    1.01
  11   2   1    1.05    0.87
  11  13   1   -0.60    0.61
  12   1  -9    2.83    0.87
  12   3   0    1.03    1.04
  12   4   2    1.11    1.10
  12   9   4    4.18    1.21
  12  13  -4   -0.11    0.53
  13   2 -12    0.89    1.18
  13   2 -11    0.82    0.92
  13   4  -3    2.64    1.39
  13   7   1    4.67    1.15
  13   9   0    0.92    1.19
  13  10  -1    1.27    1.00
  13  11  -3    1.21    0.87
  13  12  -6    0.28    0.59
  14   6  -6   -1.53    1.32
  14   8  -5    3.07    1.13
  14   9  -6    0.75    0.97
  14  10  -8    1.06    0.80
  14  11 -12    2.12    0.62
  14  11 -11   -0.25    0.61
   9   2   6  165.62    1.61
   9   3   8    3.53    0.90
  10   1   0   52.42    1.18
  10   3   6    0.68    0.84
  10  12   6    2.34    0.85
  11   0 -12    2.55    0.79
  11   3   3    4.93    0.99
  11  10   6    0.81    1.16
  11  12   3    0.86    0.86
  11  13   0    0.81    0.65
  12   1 -13   -0.10    0.94
  12   1 -12    0.89    0.98
  12   1 -11    3.81    0.87
  12   2  -5   -0.19    1.16
  12   4   1   -1.45    1.27
  12   6   4    0.81    1.15
  12   7   4    3.72    1.41
  12  10   3    3.13    0.93
  12  12  -1    0.69    0.77
  13   2 -17  100.86    1.57
  13   2 -16    0.08    1.00
  13   2 -15    0.23    0.99
  13   3  -8   15.45    1.32
  13   3  -7    4.96    1.05
  13   4  -4   -0.83    1.36
  13   5  -2   13.10    1.50
  13   8   0    0.75    1.27
  13   9  -1    0.64    1.14
  13  12  -7   -0.17    0.61
  14   4 -21    0.05    0.93
  14   4 -20   -0.55    0.94
  14   4 -18    3.96    1.03
  14   4 -15    0.81    1.17
  14   8  -6    0.27    1.10
  14  10  -9   -0.13    0.80
  14  11 -15    2.53    0.56
  14  11 -13   12.25    0.70
   7   3  11    0.04    0.51
   8   5  12   76.12    1.35
   8  10  12    5.12    0.97
   9   6  11   -0.27    1.07
   9   9  11    1.70    1.12
  10   0  -6    6.91    0.79
  10   3   5   -0.94    0.97
  10   4   7   24.93    1.08
  10   5   8    0.74    1.14
  10   9   9    3.11    1.19
  10  10   8   -0.57    1.12
  10  11   7   89.58    1.55
  10  13   3    0.87    0.72
  11   1  -5    3.05    0.84
  11   2  -1    1.68    1.05
  11  11   4    1.39    1.04
  12   1 -15   17.86    1.01
  12   1 -14    6.96    0.92
  12  10   2    3.58    1.09
  13   3  -9    7.59    1.35
  13   5  -3   -0.40    1.39
  13  10  -3   -0.82    1.00
  14   5 -12    0.18    1.18
  14   6  -9    1.63    1.28
  14   6  -8    2.04    1.10
  14   7  -8    0.30    1.19
  14   8  -8    3.93    1.11
  14   9  -9    4.07    0.99
  14  10 -11    1.15    0.81
  14  10 -10    3.95    0.72
  14  11 -18    5.08    0.47
  14  11 -17    4.15    0.47
  14  11 -16    0.70    0.48
   6   5  14   17.80    0.75
   7   4  12    0.04    0.55
   7   5  13   91.55    1.28
   8   2   7    2.93    0.58
   8   3   9    4.03    0.62
   9   1   2    4.56    0.61
   9   2   5    1.83    0.67
   9   3   7   30.32    0.95
   9  11   9    7.79    0.97
  10   2   2    1.06    0.75
  10   8   9    1.32    1.06
  10  12   5    0.78    0.88
  10  14  -1    2.55    0.55
  11   3   1    0.65    1.11
  11   4   3    3.33    1.19
  11   7   6    0.90    1.26
  11   8   6    0.63    1.28
  11  10   5   -1.00    1.00
  11  14  -5   -0.25    0.47
  12   2  -7    2.95    0.95
  12   5   1   -0.44    1.30
  12   6   2    1.39    1.38
  12   9   2    3.73    1.29
  12  10   1   -0.34    1.08
  12  13  -6    3.10    0.54
  13   3 -10    4.64    1.04
  13   4  -7    0.57    1.26
  13   4  -6    9.37    1.16
  13   5  -4    5.20    1.36
  13  10  -4    0.60    1.02
  13  11  -6    5.31    0.92
  13  12  -9    0.33    0.57
  14   5 -23    6.30    0.87
  14   5 -22   46.20    1.19
  14   6 -11   -1.29    1.19
  14   7  -9    1.05    1.20
  14   8 -27    1.60    0.49
  14   8  -9    4.14    1.11
   8   4  10   11.09    0.75
   8   5  11   40.03    1.14
   8   7  12    1.30    0.97
   8   9  12    0.67    0.94
   9   4   8    1.43    0.89
   9   5   9  110.82    1.62
   9   6  10    1.50    1.04
  10   1  -2   34.40    0.94
  10   2   1   45.96    1.18
  10   3   4   22.21    0.97
  10   5   7  135.89    1.75
  10  11   6    0.49    1.04
  10  13   2   -0.42    0.75
  11   1  -8    7.94    0.98
  11   1  -7   16.33    0.87
  11   3   0    1.98    1.07
  11   5   4    1.24    1.05
  11  10   4   -1.14    1.16
  11  12   1    1.08    0.90
  11  13  -2    1.42    0.71
  11  14  -6    0.32    0.48
  12   4  -2    0.83    1.24
  12   7   2    1.00    1.14
  12  11  -1   -1.45    0.97
  12  13  -7    0.19    0.52
  13   3 -14   20.94    1.28
  13   3 -12    8.77    1.04
  13   8  -3    1.34    1.29
  13   9  -3    1.37    1.01
  13  10  -5   29.34    1.20
  14   6 -24    2.97    0.82
  14   6 -23    2.54    0.83
  14   6 -12    1.72    1.19
  14   7 -26   -0.07    0.61
  14   7 -11    0.43    1.19
  14   7 -10   53.23    1.37
  14   8 -26    0.85    0.55
  14   8 -25    1.45    0.68
  14   9 -25    4.77    0.52
  14   9 -24    0.55    0.53
  14   9 -12    0.72    0.95
  14   9 -11    1.52    0.82
  14  10 -22    7.17    0.52
  14  10 -21    2.50    0.55
  14  10 -20   -0.24    0.60
  14  10 -19    6.66    0.67
  14  10 -18   -0.12    0.62
  14  10 -17    0.64    0.67
  14  10 -15    0.30    0.74
  14  10 -14    0.55    0.65
   7   4  11    3.89    0.64
   7   5  12    6.35    0.79
   7   6  13   38.69    0.93
   8  10  11    7.34    0.96
   9   3   6  279.49    2.04
   9  10   9    0.73    1.09
   9  13   4    0.51    0.75
  10   0 -10    8.04    0.73
  10   3   3   12.64    1.02
  10   5   6    2.10    1.08
  10   6   7    2.72    1.18
  10  14  -2   17.88    0.72
  11   1  -9    8.56    0.96
  11   4   2    4.83    1.00
  11   7   5   96.13    1.68
  11  14  -7    6.13    0.56
  12   2 -11    1.54    1.04
  12   5  -1    2.76    1.36
  12   7   1    1.40    1.34
  12  11  -2    3.14    1.06
  12  12  -4   -0.63    0.68
  12  13  -8    0.73    0.53
  13   3 -20    7.12    0.99
  13   3 -19    3.68    1.01
  13   3 -18    1.51    1.03
  13   3 -17  140.49    1.80
  13   4 -10    0.93    1.17
  13   5  -7    1.44    1.30
  13   8  -4    1.20    1.29
  13   9  -4    1.39    1.02
  13  11  -8    5.90    0.91
  13  12 -14    4.05    0.63
  13  12 -12    0.15    0.56
  14   6 -22    0.16    0.87
  14   6 -20   -0.84    1.00
  14   6 -19    5.78    0.99
  14   6 -18    0.52    1.02
  14   6 -17    0.01    1.11
  14   7 -24   -0.40    0.75
  14   7 -23    3.60    0.82
  14   7 -13    9.34    1.21
  14   8 -24    3.41    0.70
  14   8 -13   10.22    1.14
  14   8 -12    2.97    0.92
  14   9 -15    0.62    0.86
  14   9 -13    2.92    0.82
   6   5  13    0.12    0.45
   7   8  13  104.35    1.36
   8   5  10    4.99    0.89
   8   6  11   -0.48    0.72
   8   9  11   32.58    1.23
   9   5   8    6.17    1.01
   9   6   9   14.23    0.98
   9   9   9  164.92    1.96
  10   1  -4    5.88    0.70
  10   3   2    1.28    0.92
  10   7   7   31.80    1.35
  10  12   3    2.74    0.98
  10  14  -3    3.16    0.60
  11   2  -5    7.43    1.05
  11   8   4    0.12    1.32
  11  13  -3    0.46    0.63
  11  14  -8    1.47    0.51
  12   3  -7   -0.71    1.13
  12   4  -4    4.93    1.29
  12   5  -2    0.05    1.34
  12   6   0    2.79    1.12
  12  10  -1    2.63    0.99
  12  11  -3   53.60    1.36
  12  13 -10   -0.39    0.56
  13   4 -12    2.29    1.24
  13   5  -8   40.44    1.57
  13   8  -5   17.83    1.35
  13   9  -6    0.04    1.15
  13  10  -7    0.84    1.06
  13  11 -10    1.77    0.85
  13  11  -9    0.04    0.75
  13  12 -18    4.19    0.54
  13  12 -17    1.22    0.54
  13  12 -16    2.87    0.59
  13  12 -15    0.00    0.48
  14   7 -22   12.74    0.94
  14   7 -21   -0.10    0.89
  14   7 -20   -1.34    0.95
  14   7 -17    0.75    1.07
  14   8 -22   23.75    0.94
  14   8 -20   -1.76    0.82
  14   8 -19    1.76    0.87
  14   8 -18    1.18    0.93
  14   8 -16    6.59    1.04
  14   8 -15    2.02    1.00
  14   9 -21    2.77    0.64
  14   9 -19    6.12    0.82
  14   9 -18   -0.58    0.79
  14   9 -17    0.04    0.74
  14   9 -16    3.81    0.77
   7   4  10   92.59    1.18
   7   5  11    8.37    0.76
   7   6  12    6.74    0.78
   7   9  12    7.03    0.90
   8   7  11  152.91    1.67
   9   1  -1    0.28    0.54
   9   2   2    1.13    0.72
   9   4   6  421.10    2.54
   9  10   8    1.35    1.06
   9  12   5   -0.23    0.91
   9  14   0   18.12    0.76
  10   1  -5   95.46    1.25
  10   6   6    1.94    0.97
  10   9   6    1.49    1.25
  10  11   4    2.33    1.09
  11   1 -14    0.77    0.80
  11   1 -13    8.79    0.93
  11   2  -6   -0.30    0.99
  11   7   3   -0.42    1.27
  11  10   2   57.24    1.56
  11  11   1   -0.11    1.08
  11  14  -9    0.71    0.51
  12   2 -17   14.96    1.07
  12   2 -15   29.20    1.13
  12   3  -8   -0.21    1.11
  12   4  -5   -0.41    1.23
  12   6  -1    0.99    1.11
  12   9  -1    1.36    1.28
  12  10  -2    0.26    1.16
  12  11  -4    2.28    1.02
  12  13 -11   -0.03    0.57
  13   4 -13    0.13    1.16
  13   5  -9    2.74    1.10
  13   9  -7    0.84    1.19
   7   7  12    0.98    0.78
   8   3   6    3.85    0.70
   8   5   9    6.10    0.88
   8  12   7    0.84    0.90
   9   3   4    5.08    0.71
   9   5   7    0.67    0.79
   9   6   8    1.40    0.83
   9   9   8    9.92    1.20
   9  15  -5   -0.36    0.42
  10   1  -7   14.68    0.85
  10   2  -2  350.75    2.26
  10   3   1   17.65    0.91
  10   4   3   13.94    0.94
  10   7   6   -1.29    0.97
  10  12   2    3.21    0.99
  10  14  -4    1.41    0.63
  11   3  -3    1.21    0.86
  11   4  -1    3.58    1.17
  11   5   1    2.98    1.04
  11   6   2   85.44    1.74
  11  11   0    5.11    1.13
  11  12  -2    0.60    1.00
  11  14 -10   57.16    0.88
  12   3 -10   -0.10    1.13
  12   4  -6    5.96    1.27
  12  12  -7    3.02    0.76
  13   4 -18   -0.50    1.11
  13   4 -17   15.82    1.21
  13   4 -15   -0.17    0.98
  13   5 -10    4.94    1.11
  13   9  -8    0.59    1.14
  13  10 -10    0.27    0.97
  13  10  -9    1.47    0.88
  13  11 -24    1.92    0.51
  13  11 -12   -0.58    0.69
   7   6  11    1.41    0.77
   9   1  -3    8.31    0.69
   9   3   3    3.13    0.77
   9   4   5    8.97    0.94
   9   7   8   11.97    0.99
   9   8   8    0.06    0.93
   9  12   4    0.57    0.96
   9  13   2   -0.19    0.85
  10   1  -8    0.19    0.75
  10   2  -3  135.02    1.58
  10   3   0   11.10    1.00
  10   4   2    1.12    1.00
  10   7   5    2.14    1.20
  10   9   5    7.40    1.25
  10  11   3    0.79    1.17
  10  12   1    0.12    0.98
  10  13  -1   -0.52    0.73
  10  14  -5    6.61    0.71
  11   3  -4   15.50    0.98
  11   5   0    1.98    1.20
  11  10   1    1.00    0.99
  11  12  -3    0.55    0.93
  11  13  -6    2.16    0.83
  11  14 -12    4.40    0.55
  11  14 -11    0.33    0.50
  12   3 -11    4.53    1.11
  12   4  -7    3.34    1.19
  12   7  -2    2.40    1.10
  12  10  -4    2.25    1.23
  12  12  -9    1.96    0.83
  12  13 -17    3.77    0.54
  12  13 -15   10.29    0.64
  12  13 -14   -0.02    0.49
  13   5 -12    3.39    1.04
  13   8  -9    1.14    1.32
  13   9 -29    4.42    0.53
  13   9  -9   -0.89    0.98
  13  10 -11    9.63    1.06
  13  11 -23    6.02    0.59
  13  11 -21    0.52    0.59
  13  11 -16    0.22    0.80
   6   6  12   23.35    0.80
   7   7  11   19.62    0.97
   8   4   7    2.93    0.63
   8   5   8   34.53    1.04
   8   6   9    3.08    0.78
   8   9   9    3.34    1.02
   8  13   4   -1.15    0.83
   9   1  -4    0.94    0.61
   9   5   6   10.88    0.86
   9   7   7   20.94    1.22
   9   9   7   16.92    1.26
   9  15  -6    0.13    0.47
  10   1  -9    0.36    0.73
  10   2  -4   15.78    0.95
  10   3  -1   13.29    0.99
  10   6   4   56.70    1.34
  10   9   4  163.68    2.05
  11   2 -10    8.95    0.97
  11   2  -9    1.35    0.76
  11   3  -5    1.10    0.85
  11   5  -1   28.87    1.35
  11   8   1   -0.52    1.34
  11  10   0    1.94    1.25
  11  13  -7   24.48    0.97
  11  14 -14    1.70    0.50
  11  14 -13    3.33    0.54
  12   3 -14    0.86    1.06
  12   6  -4    1.22    1.12
  12   7  -3   27.76    1.29
  12  11  -7    1.05    1.07
  12  12 -10    0.19    0.84
  12  13 -19    2.50    0.44
  12  13 -18    4.96    0.49
  13   5 -23    4.06    0.99
  13   8 -29    0.63    0.59
  13   8 -10    0.36    1.26
  13   9 -10   -1.01    0.98
  13  10 -26   36.75    0.81
  13  10 -14   12.59    1.05
  13  10 -13   -0.28    0.98
  13  10 -12    0.78    0.86
  13  11 -20    0.86    0.54
   6   8  12  129.55    1.43
   8  11   7    1.19    1.01
   9   2  -1   -0.14    0.69
   9   4   4    2.47    0.73
   9   5   5    1.33    0.93
   9   8   7    2.05    0.94
   9  12   3    1.57    1.06
   9  13   1    2.26    0.86
   9  14  -2    3.09    0.74
  10   1 -10    5.91    0.73
  10   2  -5  106.49    1.43
  10   4   1   30.75    1.04
  10   5   2   -0.49    1.03
  10   6   3    9.58    1.17
  10  12   0    1.84    1.07
  10  14  -7   -0.01    0.65
  11   2 -12    1.24    0.88
  11   7   0   -0.68    1.27
  11  10  -1   11.76    1.32
  11  13  -8    0.10    0.77
  11  14 -15    0.74    0.49
  12   3 -19   -0.13    0.93
  12   3 -17    2.11    1.03
  12   3 -16    1.26    1.11
  12   4 -10    0.47    1.17
  12   5  -7   -0.10    1.29
  12   6  -5    4.50    1.15
  12   7  -4    2.62    1.09
  12  11  -8    6.90    1.11
  12  12 -12    5.25    0.88
  12  12 -11    2.80    0.70
  13   5 -21    0.43    0.89
  13   6 -25    0.10    0.92
  13   7 -27    0.28    0.81
  13   8 -27    0.93    0.69
  13   8 -11   30.94    1.30
  13   9 -27    0.66    0.62
  13   9 -26    5.90    0.73
  13   9 -12   -0.41    0.97
  13  10 -17   -0.20    0.86
  13  10 -15   -0.40    0.84
   7   5   9    3.08    0.57
   7   7  10  239.06    1.88
   8   4   6    3.91    0.60
   8   5   7    2.00    0.81
   8  12   5   14.78    1.05
   8  13   3    3.52    0.91
   8  14   0    1.24    0.80
   9   3   1   17.22    0.90
   9   4   3   56.52    1.21
   9   7   6   12.79    1.13
   9   8   6  214.27    2.19
   9  10   5    5.32    1.18
   9  13   0    0.72    0.88
   9  14  -3    1.12    0.75
   9  15  -8    1.25    0.52
  10   1 -12   22.61    0.88
  10   1 -11  118.38    1.31
  10   3  -2   38.89    1.03
  10   4   0    0.01    0.80
  10  14  -8   27.12    0.86
  11   2 -14    0.65    0.84
  11   2 -13   29.28    1.11
  11   3  -8    3.30    1.01
  11   4  -4  197.01    1.98
  11   5  -2    0.32    1.00
  11   6  -1   89.71    1.62
  11   8   0    2.73    1.11
  11  11  -3    0.72    1.13
  11  12  -5    1.92    0.84
  11  13  -9    0.66    0.77
  12   4 -12   35.58    1.37
  12   5  -8   -2.20    1.01
  12   7  -5    2.21    1.09
  12   9  -6    0.27    1.30
  12  11  -9    3.59    1.05
  12  12 -14    0.84    0.81
  13   6 -23    3.04    1.07
  13   6 -22    3.39    1.09
  13   6 -19    3.63    1.20
  13   7 -26    1.68    0.82
  13   7 -25    1.12    0.88
  13   7 -14    5.19    1.11
  13   8 -26    3.63    0.81
  13   8 -13   -0.07    1.04
  13   9 -24    0.36    0.78
  13   9 -15   -0.36    1.07
  13   9 -14   16.41    1.06
  13  10 -21    0.37    0.65
  13  10 -20    8.00    0.76
  13  10 -19    3.37    0.76
  13  10 -18   -0.43    0.72
   6   6  11    3.70    0.54
   7  10   9    3.42    0.95
   8   7   8  138.95    1.58
   8  10   7    6.33    1.13
   8  11   6    1.14    1.03
   9   2  -2    1.94    0.59
   9   5   4    3.09    0.89
   9  12   2    0.36    1.03
   9  15  -9    7.37    0.57
  10   1 -14   38.41    0.94
  10   1 -13   19.14    0.73
  10   2  -7   47.95    1.12
  10   3  -3   36.67    1.01
  10   4  -1    8.98    1.04
  10   6   2    4.73    0.96
  10  11   0    1.77    1.14
  10  13  -4    2.09    0.80
  11   2 -17    0.98    0.89
  11   2 -15    1.04    0.83
  11   4  -5   14.41    1.01
  11   6  -2    2.22    1.20
  11   8  -1  114.91    1.80
  11  13 -11    0.88    0.79
  12   4 -13    8.14    1.18
  12   5  -9    8.36    1.09
  12   9  -7    2.39    1.32
  12  11 -11    0.74    1.03
  12  11 -10   -0.48    0.87
  12  12 -24    7.19    0.57
  12  12 -23    3.97    0.56
  12  12 -17   -0.96    0.73
  12  12 -16    0.69    0.79
  12  12 -15    0.37    0.67
  13   7 -24    1.66    0.93
  13   7 -23   21.33    1.11
  13   7 -21    0.95    1.10
  13   7 -20    4.86    1.16
  13   7 -19   -0.17    1.16
  13   7 -17   78.48    1.61
  13   8 -25    2.82    0.75
  13   8 -24    0.21    0.88
  13   8 -23   14.83    1.06
  13   8 -22    0.23    0.97
  13   8 -21    0.74    1.02
  13   8 -20    4.04    1.05
  13   8 -19   -0.64    1.04
  13   8 -16    1.46    0.99
  13   8 -15    0.39    1.00
  13   9 -22   -0.37    0.88
  13   9 -20   -0.67    0.92
  13   9 -19    1.08    0.98
  13   9 -18    0.58    0.84
  13   9 -17    3.23    0.89
   7   6   9    4.35    0.65
   8   3   3    0.18    0.52
   8   5   6    0.69    0.65
   8  13   2   20.64    1.05
   8  14  -1    2.60    0.82
   8  15  -5    2.43    0.60
   9   3   0    6.89    0.68
   9   7   5    4.62    0.89
   9   9   5    5.61    1.05
   9  13  -1    2.28    1.00
   9  15 -10    2.90    0.56
  10   1 -15   19.16    0.74
  10   2  -8  173.60    1.67
  10   3  -4    0.53    0.71
  10   5   0    0.82    1.04
  10   6   1    0.75    1.14
  10   7   2    1.29    0.99
  10   9   2    1.39    1.04
  10  12  -2   18.21    1.06
  10  14 -10    0.38    0.69
  11   2 -18   20.79    0.88
  11   3 -10    1.26    0.97
  11   4  -6    0.78    0.89
  11   5  -4   28.43    1.19
  11   7  -2    1.44    1.08
  11  10  -3    1.25    1.07
  11  11  -5   -1.03    1.20
  11  12  -7    0.26    0.84
  11  13 -12    0.48    0.82
  12   4 -23    0.70    0.90
  12   4 -16    7.17    1.16
  12   4 -15  180.88    1.94
  12   6  -9    1.27    1.34
  12   7  -8    0.11    1.37
  12   9  -8   -0.01    1.25
  12  10 -10    0.64    1.15
  12  11 -28   -0.34    0.49
  12  12 -22    0.21    0.54
  12  12 -21    7.82    0.62
  12  12 -20    0.50    0.68
  12  12 -19    1.20    0.60
  12  12 -18    2.47    0.65
   7   8   9    3.00    0.88
   7  10   8    4.62    0.97
   8   8   7   18.68    1.07
   8  15  -6    2.32    0.61
   9   2  -4    2.66    0.68
   9   3  -1    6.48    0.80
   9   5   3   10.74    0.83
   9   6   4    2.51    0.82
   9   9   4    3.34    1.20
   9  13  -2    1.73    0.92
   9  15 -11    1.90    0.55
  10   2  -9   10.93    0.86
  10   3  -5   13.65    0.91
  10   7   1    3.06    1.21
  10   8   1   11.91    1.32
  10   9   1  154.33    2.04
  10  11  -1    0.63    1.00
  10  12  -3    2.02    1.08
  10  13  -6    0.44    0.94
  10  14 -11    4.35    0.71
  11   3 -12   13.51    1.08
  11   5  -5    2.57    0.99
  11   6  -4   11.34    1.33
  11  11  -6    1.29    1.23
  11  12  -9   -0.61    1.01
  11  12  -8    1.01    0.85
  11  13 -14    5.81    0.81
  11  13 -13   51.97    1.02
  12   4 -22    1.22    0.95
  12   4 -20   12.94    1.12
  12   4 -19    1.26    1.06
  12   4 -18    6.10    0.94
  12   5 -13    4.02    1.22
  12   7  -9  101.52    1.92
  12  10 -30    1.69    0.53
  12  10 -11    1.87    1.20
  12  11 -26    0.30    0.60
  12  11 -15    7.16    1.02
  12  11 -14    0.40    0.95
  12  11 -13   -0.41    0.85
   6   8  10    0.94    0.69
   7   6   8    7.78    0.65
   8   5   5  543.37    2.65
   9   6   3    1.13    0.98
   9  12   0    9.80    1.15
   9  14  -6   22.17    0.95
   9  15 -13    0.70    0.52
   9  15 -12    0.16    0.51
  10   2 -10    0.10    0.66
  10   3  -6    0.30    0.86
  10   4  -3    6.18    0.82
  10  11  -2    1.76    1.25
  10  13  -7    1.91    0.92
  10  14 -13    1.74    0.66
  10  14 -12    0.51    0.59
  11   3 -14    7.98    0.99
  11   6  -5    0.23    1.26
  11   7  -4   16.02    1.35
  11   8  -4   18.13    1.50
  11   9  -4   11.17    1.25
  11  10  -5   -0.34    1.14
  11  13 -24    1.12    0.50
  11  13 -23    6.33    0.57
  11  13 -16    6.04    0.78
  11  13 -15   10.47    0.73
  12   5 -15    2.79    1.24
  12   5 -14    2.30    0.97
  12   7 -10    4.58    1.14
  12   8 -31    0.43    0.68
  12   9 -11    5.09    1.31
  12  10 -29    0.34    0.59
  12  10 -28    1.24    0.63
  12  10 -13   -0.09    1.14
  12  10 -12    4.02    1.01
  12  11 -25   -0.14    0.66
  12  11 -24    0.84    0.71
  12  11 -23    1.26    0.74
  12  11 -18   23.03    1.07
  12  11 -17    1.74    0.96
  12  11 -16    0.58    0.81
   7   7   8    1.54    0.77
   7   9   8    1.83    0.75
   7  14   0    0.34    0.80
   8   7   6    1.06    0.76
   8  10   5    4.93    1.10
   8  11   4    0.67    1.05
   8  13   0   -0.85    0.98
   8  14  -3    0.00    0.81
   8  15  -7    6.47    0.65
   9   3  -2    1.84    0.61
   9   4   0    4.05    0.69
   9   7   3  193.09    2.00
   9   8   3   10.54    1.18
   9  10   2    1.19    1.22
   9  13  -3   44.03    1.13
   9  14  -7    0.60    0.83
   9  15 -14   -0.29    0.53
  10   3  -7    1.15    0.87
  10   4  -4    2.24    0.79
  10   7   0    2.41    1.00
  10  12  -5   -0.09    1.12
  10  13  -8    4.24    0.96
  10  14 -15    2.78    0.66
  10  14 -14   12.61    0.75
  11   3 -15   -0.07    0.92
  11   4 -10   13.82    1.11
  11   7  -5    3.30    1.26
  11   8  -5    5.12    1.34
  11   9  -5    3.31    1.15
  11  12 -11    0.93    0.85
  11  13 -22    0.58    0.53
  11  13 -21    1.67    0.63
  11  13 -20    0.77    0.63
  11  13 -19   19.11    0.73
  12   5 -22    3.14    1.11
  12   5 -21   26.89    1.27
  12   5 -20    0.92    1.13
  12   5 -19   -0.14    1.15
  12   5 -17    4.41    1.00
  12   6 -13    1.50    1.06
  12   7 -30   -0.10    0.77
  12   7 -29    0.94    0.80
  12   7 -12    5.48    1.30
  12   8 -30   66.26    1.15
  12   9 -13    4.95    1.31
  12  11 -20   -0.23    0.70
  12  11 -19    1.09    0.78
   6   6   9    0.15    0.49
   6   9   9   93.98    1.33
   7  13   2   -0.41    0.88
   7  15  -4    0.46    0.65
   8   7   5   72.31    1.33
   8  15  -8    6.50    0.68
   9   5   1    8.23    0.80
   9   6   2   -0.46    0.79
   9   9   2    2.78    1.12
   9  13  -4    0.78    1.03
   9  14  -8    0.53    0.84
   9  15 -17    0.18    0.49
   9  15 -16    1.18    0.51
   9  15 -15    7.45    0.55
  10   2 -14  132.47    1.45
  10   8  -1    2.13    1.23
  10  11  -4    4.09    1.28
  10  12  -6    4.04    1.18
  10  14 -22    1.96    0.51
  10  14 -19    0.44    0.58
  10  14 -18   -0.36    0.60
  10  14 -17    0.27    0.63
  10  14 -16    2.19    0.64
  11   3 -19    4.54    0.98
  11   3 -18   -0.50    0.90
  11   3 -17    0.47    0.76
  11   4 -12    5.11    1.06
  11   4 -11    1.78    0.89
  11   6  -7    2.60    1.26
  11   7  -6   -0.26    1.25
  11   9  -6    8.58    1.18
  11  11  -9    3.12    1.05
  11  12 -28   24.42    0.68
  11  12 -13    8.15    1.07
  11  12 -12    0.52    0.86
  12   6 -27   20.39    1.04
  12   6 -25    6.16    1.04
  12   6 -17    0.95    1.19
  12   6 -15    4.03    1.03
  12   7 -14    3.14    1.32
  12   7 -13    2.24    1.16
  12   8 -29    0.04    0.81
  12   8 -28   -0.87    0.84
  12   9 -28    4.17    0.83
  12   9 -14    0.48    1.08
  12  10 -26   -0.56    0.66
  12  10 -25    4.00    0.87
  12  10 -24   13.37    0.93
  12  10 -19    0.02    1.01
  12  10 -18    3.76    1.12
  12  10 -16   -0.14    0.94
   6   7   9  339.60    1.98
   6   8   9  157.07    1.52
   6  10   8    5.47    0.87
   7   8   7  232.44    1.95
   7   9   7   21.02    0.95
   7  10   6    0.90    0.97
   7  11   5    1.95    0.94
   7  14  -1    3.01    0.86
   7  15  -5    3.31    0.70
   8   4   2   21.44    0.73
   8   6   4    2.41    0.85
   8  10   4    4.49    0.93
   8  11   3    2.52    0.95
   8  13  -1    5.15    1.03
   8  15  -9    0.03    0.66
   9   2  -7    0.81    0.51
   9   3  -4    3.43    0.71
   9   6   1    4.89    0.99
   9   7   2    0.35    0.85
   9  10   1    1.71    0.96
   9  12  -2    2.27    1.01
   9  13  -5    1.72    1.05
   9  15 -18   11.52    0.55
  10   2 -16   -1.28    0.73
  10   3  -9    4.70    0.85
  10   7  -2   91.20    1.68
  10   8  -2  232.71    2.36
  10   9  -2  198.57    2.14
  10  10  -3    1.42    1.30
  10  14 -20   35.31    0.77
  11   7  -7   37.09    1.48
  11   9  -7   18.27    1.22
  11  10 -33    8.48    0.57
  11  10  -8    0.46    1.13
  11  11 -31    1.78    0.52
  11  11 -10    6.33    1.07
  11  12 -27   -0.16    0.56
  11  12 -26    1.92    0.60
  11  12 -15   -0.68    0.99
  11  12 -14   -1.19    0.82
  12   7 -27    8.30    1.01
  12   7 -25    2.61    1.02
  12   8 -26    9.75    0.98
  12   9 -25   -0.27    0.98
  12   9 -17    1.86    1.21
  12   9 -16    0.98    1.05
  12  10 -22   -1.08    0.77
  12  10 -21    0.21    0.80
   7   6   6    2.04    0.71
   7  15  -6    0.13    0.76
   8   7   4    0.87    0.93
   8   8   4    0.94    0.98
   8   9   4   10.64    1.11
   8  11   2    1.89    1.14
   8  13  -2    0.06    1.00
   8  14  -5    2.92    0.92
   9   3  -5    0.68    0.70
   9   4  -2    2.89    0.69
   9   7   1    3.97    1.05
   9   8   1   -0.82    1.07
   9  13  -6   48.83    1.34
   9  14 -10    3.15    0.89
  10   2 -18    4.83    0.79
  10   4  -7    1.65    0.93
  10   7  -3   -0.13    1.21
  10   9  -3    3.95    1.35
  10  10  -4    1.32    1.32
  10  11  -5   76.19    1.57
  10  12  -8   39.56    1.39
  11   4 -16   88.18    1.51
  11   5 -11    4.43    1.10
  11   6  -9   10.02    1.11
  11   7  -8   -1.06    1.07
  11   9 -34    0.38    0.55
  11   9  -8    4.11    1.10
  11  10 -32    0.70    0.65
  11  10 -10   13.23    1.39
  11  10  -9   -0.90    1.10
  11  11 -30    1.32    0.58
  11  12 -25    4.47    0.68
  11  12 -24   -1.37    0.72
  11  12 -23    0.38    0.73
  11  12 -19    1.44    0.89
  11  12 -17   -0.48    0.93
  12   7 -24   17.41    1.18
  12   7 -23    2.34    1.12
  12   7 -22    0.15    1.20
  12   8 -25    0.23    1.00
  12   8 -19    3.83    1.22
  12   8 -18   76.15    1.54
  12   9 -23    0.41    0.83
  12   9 -22    1.48    0.87
  12   9 -20   -0.11    0.94
   6   7   8    5.57    0.68
   7   8   6    3.50    0.90
   7   9   6    3.23    0.78
   7  10   5   10.37    1.03
   7  11   4   14.44    1.09
   7  14  -2    6.44    0.86
   8   5   2    1.50    0.73
   8  15 -12    1.75    0.68
   8  15 -11    1.00    0.67
   9   4  -3   28.66    0.97
   9   9   0   39.27    1.39
   9  12  -4    0.84    1.16
   9  14 -12   58.67    1.16
  10   3 -12    0.04    0.83
  10   3 -11   15.36    0.81
  10   4  -8  128.97    1.61
  10   5  -6    8.05    1.07
  10  12  -9    1.96    1.14
  10  13 -28    2.46    0.50
  10  13 -14    0.18    0.91
  11   4 -24    0.00    0.92
  11   4 -23    2.35    0.95
  11   4 -20    0.09    1.01
  11   4 -19    1.63    1.03
  11   4 -18    0.21    1.07
  11   5 -12    1.83    0.94
  11   6 -11    2.36    1.25
  11   8  -9    2.34    1.32
  11   9 -33    4.04    0.68
  11  10 -11    2.40    1.26
  11  11 -29   -0.05    0.63
  11  11 -14   -0.53    1.17
  11  11 -13    5.65    1.04
  11  12 -22   37.49    0.95
  11  12 -21    2.99    0.74
   6  10   7   10.87    0.77
   6  11   6    2.08    0.85
   6  16 -10    3.09    0.58
   7   5   4  280.82    1.83
   7   6   5    1.66    0.70
   7  12   2    6.88    1.08
   7  13   0   -0.13    1.01
   7  15  -7    1.21    0.72
   8   8   3   -0.40    1.01
   8   9   3    5.33    0.93
   8  14  -7   20.32    1.02
   8  15 -13   21.97    0.82
   9   4  -4    0.89    0.79
   9   6  -1   10.72    1.05
   9  10  -1    1.69    1.01
   9  13  -8    0.55    1.02
   9  14 -13    0.82    0.85
  10   3 -13    1.16    0.86
  10   4  -9   18.52    1.00
  10   6  -5   27.73    1.13
  10   7  -4    1.81    1.00
  10   9  -5  111.23    1.93
  10  10  -6    6.19    1.36
  10  12 -10    3.77    1.00
  10  13 -27    0.36    0.53
  10  13 -26   14.11    0.68
  10  13 -16    0.66    0.90
  10  13 -15    0.87    0.77
  11   4 -22    4.25    0.82
  11   5 -15    1.63    1.15
  11   5 -14    2.12    0.91
  11   6 -12    0.45    1.22
  11   7 -11    2.39    1.31
  11   8 -33    0.97    0.70
  11  10 -31    1.82    0.69
  11  10 -13   10.35    1.33
  11  11 -28   -0.10    0.62
  11  11 -26    0.08    0.79
  11  11 -17   -0.93    1.08
  11  11 -16   21.56    1.25
   5   8   9    0.17    0.60
   6  14  -1   -0.32    0.93
   6  16 -11   10.45    0.65
   7   7   5   -0.50    0.74
   7   8   5    9.32    0.91
   7   9   5    2.24    0.78
   7  11   3    1.48    1.09
   7  15  -8    3.59    0.77
   8   6   2  115.28    1.37
   8   9   2   72.12    1.51
   8  15 -15    2.11    0.66
   8  15 -14    0.35    0.66
   9   2 -11    3.00    0.55
   9   5  -3   81.89    1.37
   9   8  -1    3.44    1.14
   9  10  -2    0.54    1.21
   9  14 -15   -0.21    0.80
   9  14 -14    7.89    0.88
  10   3 -15   15.75    0.95
  10   4 -10    8.17    0.83
  10   7  -5   32.32    1.22
  10   9  -6    9.14    1.34
  10  10 -36    0.75    0.46
  10  10  -7    2.60    1.35
  10  11 -34    1.46    0.48
  10  11  -9    0.78    1.28
  10  11  -8    3.35    1.13
  10  12 -31    1.11    0.52
  10  12 -12   -0.85    1.11
  10  12 -11    7.39    1.04
  10  13 -24    2.22    0.69
  10  13 -23   10.41    0.78
  10  13 -22    2.44    0.74
  10  13 -21    1.37    0.74
  10  13 -20   14.08    0.91
  10  13 -19    8.21    0.89
  10  13 -17    7.19    0.81
  11   5 -27    0.21    0.92
  11   5 -26   -0.16    0.96
  11   5 -18   18.96    1.21
  11   5 -17    1.55    1.13
  11   6 -14    9.30    1.28
  11   7 -31  108.78    1.44
  11   8 -32    1.27    0.80
  11   8 -12    0.32    1.39
  11   8 -11    0.57    1.10
  11   9 -31   10.70    0.86
  11  10 -29    0.58    0.80
  11  10 -15    1.25    1.22
  11  10 -14    2.94    1.06
  11  11 -25   36.79    1.00
  11  11 -21    0.19    1.03
  11  11 -19    6.24    1.09
  11  11 -18    0.28    0.93
   6   8   7    2.86    0.60
   6  10   6   38.52    1.11
   6  11   5   -1.01    0.91
   6  15  -5   -0.08    0.73
   6  16 -12   24.57    0.75
   7   6   4  225.02    1.73
   7  12   1    2.70    1.09
   7  13  -1    3.81    1.03
   7  14  -4    0.08    0.76
   7  15  -9    1.04    0.77
   8   4  -1  306.41    1.89
   8   6   1    8.60    0.84
   8   7   2   24.43    0.91
   8   8   2  135.49    1.62
   8  14  -9    0.69    0.95
   8  15 -17    4.62    0.66
   8  15 -16    4.99    0.68
   9   2 -13    0.49    0.63
   9   3  -8    1.86    0.59
   9   4  -5   30.56    0.87
   9   6  -2    2.24    0.81
   9   7  -2   -0.16    1.00
   9  12  -6   83.16    1.54
   9  13 -10    0.57    1.07
   9  14 -26    0.71    0.44
   9  14 -25   -0.21    0.52
   9  14 -18   41.65    1.03
   9  14 -17    2.64    0.83
   9  14 -16    0.08    0.69
  10   3 -18    0.63    0.82
  10   4 -12    2.46    0.93
  10   8  -6    3.77    1.08
  10   9  -7    3.41    1.31
  10  10 -35    5.59    0.56
  10  11 -33    1.43    0.54
  10  12 -30    2.30    0.58
  11   5 -24    1.18    1.02
  11   5 -23    1.17    1.08
  11   5 -21   -0.83    1.09
  11   5 -19   22.40    1.08
  11   6 -29    0.14    0.88
  11   6 -15   -0.99    0.96
  11   7 -30    4.16    0.96
  11   7 -14    1.58    1.29
  11   8 -31    5.10    0.83
  11   8 -30    1.65    0.87
  11   9 -30    5.12    0.87
  11   9 -29   -0.43    0.85
  11  10 -28   54.25    1.08
  11  10 -27    1.99    0.93
  11  10 -17    0.58    1.29
  11  10 -16   34.60    1.31
   5   9   8  149.71    1.45
   6   9   6   21.14    0.96
   6  15  -6    2.74    0.81
   6  16 -13   -0.18    0.52
   7   8   4  247.03    1.97
   7  10   3    0.93    1.00
   7  11   2    1.02    1.08
   7  14  -5   12.32    1.07
   7  15 -10    0.62    0.80
   8   4  -2    0.88    0.63
   8   8   1    2.82    0.96
   8   9   1    3.60    1.06
   8  10   0    0.51    1.17
   8  11  -1   25.86    1.31
   8  13  -6    3.34    1.13
   8  14 -10   64.25    1.33
   8  15 -23    1.72    0.45
   8  15 -22   -0.40    0.50
   8  15 -21    0.48    0.54
   8  15 -20    0.66    0.55
   8  15 -19   14.07    0.70
   8  15 -18    0.70    0.55
   9   2 -14    2.93    0.54
   9   5  -4    1.64    0.73
   9   8  -2    2.50    0.94
   9  11  -5    1.63    1.25
   9  13 -11    0.42    1.08
   9  14 -24    3.56    0.55
   9  14 -23   -0.54    0.57
   9  14 -22    0.86    0.69
   9  14 -21    1.95    0.71
   9  14 -20    1.00    0.62
   9  14 -19    4.89    0.68
  10   3 -22    5.98    0.88
  10   3 -21    6.10    0.85
  10   3 -20   21.71    0.98
  10   3 -19    4.02    0.72
  10   5 -10    6.68    1.06
  10   6  -8  145.39    1.76
  10   7  -7    0.62    0.98
  10   9 -36   -0.40    0.56
  10  10  -9    0.70    1.42
  10  11 -32    1.84    0.61
  10  11 -11   15.09    1.39
  10  12 -29    0.37    0.55
  10  12 -15   -0.97    1.10
  10  12 -14   30.85    1.18
  11   6 -20    0.27    1.14
  11   6 -19    2.40    1.23
  11   6 -17    8.31    1.02
  11   7 -29    0.66    0.95
  11   7 -28    9.04    1.11
  11   7 -16   -1.06    1.26
  11   8 -15    1.01    1.14
  11   9 -28    6.61    1.04
  11   9 -27    0.55    0.98
  11  10 -26    0.75    0.82
  11  10 -25   21.88    0.98
  11  10 -22   27.65    1.26
  11  10 -20    0.91    1.16
   6   7   6    2.12    0.55
   6  11   4    4.14    0.97
   6  15  -7    1.87    0.86
   6  16 -14    0.15    0.54
   7  12   0    3.60    0.88
   7  15 -11   22.02    0.92
   8   6   0    1.79    0.66
   8  14 -11    1.40    0.97
   9   2 -16    0.35    0.62
   9   6  -4    5.18    0.99
   9   8  -3   32.38    1.17
   9  12  -8    1.55    1.05
   9  13 -30    1.64    0.51
   9  13 -13   -0.52    1.02
   9  13 -12    9.39    0.91
  10   7  -8   -0.52    0.99
  10   8  -8  125.88    1.80
  10   9 -35   28.76    0.85
  10   9  -9    3.83    1.32
  10  10 -34    0.59    0.61
  10  11 -31    4.58    0.72
  10  11 -12   -0.60    1.08
  10  12 -27   -0.17    0.63
  10  12 -26   33.77    1.04
  10  12 -25    0.13    0.82
  10  12 -19    2.00    1.01
  10  12 -18    2.79    1.11
  10  12 -16    5.73    1.00
  11   6 -23    4.96    0.94
  11   6 -21    0.54    0.97
  11   7 -27    2.52    1.07
  11   7 -21    7.30    1.23
  11   7 -20    8.01    1.20
  11   7 -18    0.31    1.02
  11   7 -17    0.65    1.04
  11   8 -28    6.76    0.90
  11   8 -26    1.50    1.14
  11   8 -25   70.82    1.53
  11   8 -17    0.09    1.06
  11   9 -26    0.41    0.89
  11   9 -25   28.91    1.23
  11   9 -23    1.45    1.18
  11   9 -21    0.74    1.25
  11   9 -20    3.76    1.26
   5   9   7    5.08    0.72
   5  16 -10   16.00    0.70
   6   9   5    0.48    0.84
   6  12   2    3.10    0.95
   6  14  -3    4.24    0.93
   6  16 -17    0.96    0.55
   6  16 -16    0.22    0.54
   6  16 -15    0.86    0.56
   7   9   3    2.73    0.79
   7  10   2    1.92    1.02
   7  11   1   60.77    1.30
   7  14  -7   -0.22    0.93
   7  15 -13   -0.19    0.75
   7  15 -12    5.70    0.82
   8   7   0    1.58    0.73
   8   9   0    5.08    0.90
   8  13  -7   52.04    1.32
   8  14 -12    0.32    0.94
   9   2 -18  100.10    1.20
   9   3 -11   15.46    0.70
   9   4  -8    0.73    0.61
   9   7  -4    8.51    0.94
   9   9  -4    3.15    1.02
   9  11 -36   -0.15    0.48
   9  12 -34    1.21    0.44
   9  12 -10    0.42    1.23
   9  13 -29    5.03    0.61
   9  13 -14    2.56    1.05
  10   5 -13    2.42    0.99
  10   6 -10    5.37    0.95
  10   7 -10    1.61    1.17
  10   7  -9    3.92    1.02
  10   8  -9    2.98    1.05
  10   9 -34   -0.02    0.71
  10   9 -10    5.96    1.30
  10  10 -33    2.63    0.72
  10  11 -14   -0.49    1.22
  10  12 -24    1.83    0.75
  10  12 -22   -0.12    0.83
  10  12 -21    0.10    0.85
  10  12 -20   44.59    1.17
  11   7 -22    1.52    1.05
  11   8 -24    8.36    1.02
  11   8 -23    1.27    0.95
   5  16 -11    3.30    0.61
   6   7   5    5.32    0.57
   6  10   4    9.57    0.97
   6  11   3    4.70    0.98
   6  14  -4   -1.36    0.96
   6  15  -8    1.31    0.83
   6  16 -19    0.08    0.51
   6  16 -18   22.34    0.68
   7   9   2   -1.14    0.96
   7  11   0    2.64    1.12
   7  15 -14   16.29    0.89
   8   5  -2    0.03    0.60
   8   6  -1   18.17    0.80
   8   7  -1   42.39    1.16
   8  11  -3    2.93    0.98
   8  13  -8    0.80    0.94
   8  14 -29   -0.14    0.47
   8  14 -14    1.75    0.97
   8  14 -13   12.82    0.87
   9   3 -13   52.87    1.06
   9   3 -12    5.38    0.63
   9   4  -9   33.15    0.98
   9   5  -7    2.82    0.87
   9  12 -33    0.51    0.52
   9  12 -11    1.05    1.29
   9  13 -28   -0.35    0.54
   9  13 -27   33.06    0.91
   9  13 -17    4.94    1.03
   9  13 -16    4.46    1.05
  10   4 -25    2.23    0.92
  10   4 -24    3.04    0.94
  10   4 -22    1.15    0.90
  10   4 -21    0.41    0.91
  10   4 -20   67.11    1.33
  10   4 -18    4.35    0.80
  10   8 -34    0.23    0.80
  10   8 -11   13.46    1.37
  10   9 -33    0.85    0.80
  10  10 -32   31.25    0.97
  10  11 -29   62.98    1.13
  10  11 -28    5.69    0.92
  10  11 -16    0.67    1.02
   5  16 -12    0.49    0.60
   6   9   4    0.44    0.78
   6  15  -9   18.51    0.94
   7   7   2    1.44    0.62
   7   8   2    3.56    0.73
   7  13  -5    2.98    1.19
   7  14  -9    5.18    1.05
   7  15 -16    0.24    0.77
   7  15 -15    0.29    0.70
   8   5  -3    1.13    0.59
   8   8  -1    4.60    0.85
   8   9  -2    1.37    1.05
   8  13  -9    0.92    0.96
   8  14 -28   12.99    0.57
   8  14 -27    3.68    0.62
   8  14 -15    1.21    0.78
   9   3 -14   -0.56    0.72
   9   4 -10    0.36    0.64
   9   5  -8    2.38    0.86
   9   8  -6   45.91    1.40
   9  10 -37    0.29    0.52
   9  10  -7   -0.56    1.06
   9  11 -35   -0.66    0.56
   9  12 -32   -0.24    0.59
   9  13 -26    3.79    0.65
   9  13 -25   -0.21    0.78
   9  13 -24   58.43    1.17
   9  13 -23   14.51    0.97
   9  13 -22    0.77    0.89
   9  13 -21   47.59    1.24
   9  13 -20    4.67    1.01
   9  13 -19   -0.63    1.00
  10   5 -16    3.65    1.07
  10   6 -13   -0.39    0.91
  10   7 -33    2.06    0.89
  10   7 -12    7.29    1.05
  10   8 -33    0.83    0.85
  10   9 -32   24.65    1.04
  10  10 -31    0.44    0.72
  10  10 -30    3.73    0.95
  10  11 -27   14.20    0.87
  10  11 -26    1.22    0.94
  10  11 -25    0.53    1.02
  10  11 -24    5.46    1.10
  10  11 -21    3.03    1.16
   5  14  -2    1.26    0.87
   5  15  -6    0.58    0.79
   5  16 -14    1.14    0.68
   5  16 -13    2.91    0.63
   6   7   4    2.63    0.65
   6   8   4    2.28    0.76
   6  11   2    2.70    0.82
   6  12   0    5.26    1.09
   6  14  -5    0.28    0.78
   6  15 -10   -0.13    0.83
   7   6   1  104.76    1.20
   7  10   0    0.55    1.07
   7  11  -1    3.16    1.10
   7  13  -6   -0.66    1.15
   7  14 -10    7.76    1.05
   7  15 -25    0.35    0.48
   7  15 -24    2.70    0.57
   7  15 -23   27.21    0.77
   7  15 -22    2.67    0.62
   7  15 -21    2.36    0.66
   7  15 -20    0.88    0.68
   7  15 -19    2.82    0.73
   7  15 -18    0.24    0.72
   7  15 -17   16.80    0.77
   8   7  -2    0.20    0.72
   8   8  -2    2.19    0.83
   8  11  -5    1.27    1.23
   8  13 -33    0.53    0.49
   8  13 -11    3.47    1.20
   8  14 -26    0.34    0.53
   8  14 -25    6.23    0.74
   8  14 -24    0.10    0.73
   8  14 -23    3.08    0.79
   8  14 -21    6.46    0.86
   8  14 -20    0.77    0.85
   8  14 -17    1.42    0.76
   9   3 -16    2.54    0.72
   9   3 -15  718.61    2.92
   9   4 -11    0.53    0.65
   9   5  -9   27.42    1.04
   9   6  -7   20.85    0.95
   9   7  -7    3.05    1.01
   9   9 -37    1.52    0.71
   9   9  -7    1.76    1.04
   9  10 -36   26.91    0.80
   9  10  -8    0.20    1.07
   9  11 -34    0.48    0.63
   9  12 -31    0.22    0.59
   9  12 -30   65.60    1.10
  10   5 -28    1.06    0.93
  10   5 -26   18.42    1.10
  10   5 -20    1.37    0.98
  10   5 -18    3.20    1.02
  10   5 -17   33.69    1.11
  10   7 -32   20.21    1.07
  10   7 -31   -0.90    0.93
  10   8 -32   10.01    1.01
  10   8 -14  124.84    1.96
  10   8 -13    3.64    1.09
  10   9 -31   -0.30    0.93
  10   9 -14    0.82    1.06
  10  10 -29    5.41    1.00
  10  10 -28   -0.61    0.98
   5  13   0    0.96    0.91
   5  14  -3   -0.20    0.91
   5  15  -7   19.34    0.97
   5  16 -15    0.08    0.63
   6  14  -6    2.30    0.99
   6  15 -12    4.36    0.86
   6  15 -11   -0.25    0.84
   7   7   1  113.26    1.31
   7  12  -4    1.72    1.19
   7  14 -11   31.51    1.24
   8   4  -6    4.18    0.56
   8   6  -3    4.28    0.70
   8   7  -3   11.56    0.97
   8  11 -38    0.40    0.45
   8  11  -6    1.07    1.27
   8  13 -32    0.31    0.52
   8  13 -12   -0.35    1.13
   8  14 -22    7.32    0.74
   9   3 -18    4.31    0.78
   9   3 -17    5.62    0.62
   9   4 -12  100.63    1.28
   9   5 -10    2.89    0.88
   9   6  -8    7.92    0.87
   9   7  -8    1.33    1.03
   9   9  -8    7.56    1.10
   9  10 -35    3.99    0.72
   9  10  -9    7.28    1.14
   9  11 -33   11.86    0.80
   9  12 -29    2.79    0.80
   9  12 -16   -0.24    1.26
   9  12 -15   17.48    1.18
  10   5 -24   -0.37    1.00
  10   5 -22    0.43    0.98
  10   5 -21    1.19    0.83
  10   6 -29  105.92    1.60
  10   6 -28   -0.66    1.01
  10   6 -18    0.74    1.11
  10   6 -17    4.33    1.09
  10   6 -16    1.03    0.91
  10   7 -30    1.69    1.04
  10   7 -16    1.14    1.21
  10   7 -15   -0.12    0.99
  10   8 -31   -0.46    0.96
  10   8 -30    0.56    1.03
  10   8 -16   11.93    1.32
  10   9 -30    0.57    0.82
  10   9 -29   15.15    1.16
  10   9 -16    3.73    1.13
  10  10 -27    1.51    0.88
  10  10 -26  111.58    1.68
  10  10 -25    0.06    1.15
  10  10 -24   -0.07    1.18
  10  10 -23    2.38    1.24
  10  10 -22   -0.05    1.27
  10  10 -21    2.97    1.30
  10  10 -19    0.80    1.13
   4  16 -11    3.54    0.65
   5   9   5    4.18    0.73
   5  15  -8    3.37    0.87
   5  16 -18    0.49    0.58
   5  16 -17    0.31    0.62
   5  16 -16    6.88    0.67
   6   8   3  109.44    1.35
   6  12  -1    0.47    1.11
   6  14  -7    1.08    1.02
   6  15 -13   -0.83    0.87
   7   7   0    4.89    0.80
   7   8   0   11.95    0.95
   7   9   0    1.23    0.81
   7  10  -1    2.76    0.94
   7  13  -7    6.06    1.06
   7  14 -31   -0.38    0.47
   8   6  -4    3.77    0.69
   8  10 -39    0.65    0.47
   8  12 -35   -0.07    0.50
   8  13 -31   14.40    0.63
   8  13 -30    1.54    0.64
   8  13 -14    3.14    1.19
   9   3 -20    0.09    0.69
   9   5 -11    0.48    0.85
   9   6  -9    1.45    0.81
   9   7  -9  348.33    2.53
   9   8  -9    4.78    1.16
   9   8  -8    1.96    0.99
   9   9 -36    4.53    0.77
   9   9  -9   21.47    1.21
   9  10 -10    3.42    1.18
   9  11 -32    0.90    0.84
   9  12 -28    2.08    0.73
   9  12 -27    8.21    0.92
   9  12 -25    2.39    0.98
   9  12 -20   -0.90    1.11
   9  12 -19   16.93    1.30
   9  12 -18   10.83    1.07
   9  12 -17    0.49    1.03
  10   6 -27    7.87    1.08
  10   6 -26    3.64    1.14
  10   6 -25    3.27    1.13
  10   6 -24    1.01    1.13
  10   6 -22    0.94    1.13
  10   6 -21   11.90    1.26
  10   6 -20   97.26    1.69
  10   6 -19    2.40    0.96
  10   7 -19    0.22    1.16
  10   7 -18    0.95    1.21
  10   8 -29    2.83    1.07
  10   8 -17   68.71    1.52
  10   9 -25    0.85    1.16
  10   9 -24    2.30    1.23
  10   9 -19    1.98    1.33
  10   9 -18   -1.24    1.08
   4  16 -12    0.32    0.64
   5   8   5   40.38    0.87
   5  10   4    5.32    0.69
   5  12   1   -0.50    0.93
   5  13  -1    9.18    0.99
   5  15  -9    1.04    0.85
   5  16 -22   18.31    0.63
   5  16 -21    0.22    0.52
   5  16 -20    0.49    0.54
   5  16 -19    1.89    0.58
   6   9   2   20.73    0.99
   6  12  -2    3.99    1.10
   6  14  -8    1.11    1.06
   6  15 -15   17.04    0.96
   6  15 -14    0.59    0.86
   7   9  -1    2.50    1.01
   7  10  -2    9.68    1.15
   7  11  -3   -1.10    0.95
   7  12  -5   -0.66    0.98
   7  14 -30   -0.92    0.54
   7  14 -14   11.06    1.10
   7  14 -13    0.89    0.81
   8   5  -6    2.20    0.62
   8   6  -5   31.72    1.03
   8   7  -4  113.42    1.44
   8   8  -4    9.25    0.89
   8  11 -37   29.27    0.75
   8  11  -8    0.83    1.24
   8  12 -34    7.34    0.67
   8  13 -29    0.78    0.72
   8  13 -16    1.13    1.14
   8  13 -15   11.70    1.07
   9   4 -15   88.02    1.23
   9   5 -12    1.77    0.71
   9   6 -10    1.39    0.80
   9   7 -10    2.96    1.12
   9   8 -36   28.93    0.97
   9   9 -10    1.45    1.04
   9  10 -34   -0.04    0.67
   9  11 -31    0.45    0.85
   9  11 -30   -0.40    0.88
   9  12 -23    1.93    0.92
   9  12 -21   -0.63    0.96
  10   7 -24   -0.43    1.17
  10   7 -23    4.07    1.27
  10   7 -22    0.14    1.21
  10   7 -21    7.29    1.17
  10   7 -20   10.30    1.05
  10   8 -23   -0.33    1.21
  10   8 -21    0.66    1.27
   4  16 -13    0.38    0.67
   5  11   2  190.46    1.81
   5  13  -2    0.12    0.95
   5  14  -5    0.89    1.00
   5  15 -10   15.76    1.00
   6   8   2    0.15    0.72
   6  10   1   18.54    0.91
   6  14  -9    2.87    1.09
   6  15 -27   35.24    0.76
   6  15 -26    5.95    0.61
   6  15 -17    1.16    0.86
   6  15 -16   -0.88    0.88
   7   8  -1    1.63    0.72
   7  11  -4    0.13    1.19
   7  12  -6    4.84    1.01
   7  13 -34    1.15    0.52
   7  13  -9   -1.60    0.97
   7  14 -29   13.57    0.62
   7  14 -28    0.05    0.65
   7  14 -16    1.59    1.02
   7  14 -15    6.85    1.06
   8   4  -9    0.45    0.66
   8   5  -7  400.56    2.28
   8   6  -6    2.76    0.79
   8   8  -5    0.13    0.83
   8  11 -36   -0.17    0.63
   8  12 -33    0.99    0.69
   8  13 -28    0.75    0.67
   8  13 -27   -0.23    0.82
   8  13 -26    3.95    0.87
   8  13 -18    5.01    1.14
   8  13 -17    0.46    0.95
   9   4 -18    7.01    0.89
   9   4 -17    1.62    0.79
   9   5 -13    2.55    0.75
   9   6 -11    2.84    0.82
   9   8 -35    2.37    0.89
   9   8 -11    1.28    1.20
   9   9 -34    0.38    0.87
   9  10 -33    4.34    0.77
   9  10 -32    5.29    0.91
   9  10 -14    7.20    1.29
   9  10 -13    2.38    1.09
   9  11 -29    0.57    0.95
   4  15  -7    0.12    0.84
   4  16 -15    7.47    0.70
   5  12   0    6.44    1.03
   5  15 -11    6.89    0.96
   6   9   1   -0.52    0.83
   6  10   0  492.12    2.78
   6  11  -1    0.98    1.03
   6  14 -10   -1.53    1.11
   6  15 -25    0.43    0.53
   6  15 -24    5.72    0.68
   6  15 -23    0.19    0.68
   6  15 -22   -0.67    0.73
   6  15 -21   29.58    0.95
   6  15 -20   -0.34    0.79
   6  15 -19    2.58    0.82
   6  15 -18    0.68    0.71
   7   6  -2    5.44    0.59
   7   7  -2   17.05    0.84
   7   8  -2  103.92    1.42
   7   9  -2   -0.58    0.82
   7  12 -37    0.93    0.48
   7  14 -26   32.81    0.98
   7  14 -25    9.64    0.85
   7  14 -17   36.96    1.11
   8   7  -6    0.71    0.92
   8   8  -6    0.79    1.02
   8  10 -37   10.78    0.73
   8  10  -8    6.30    1.34
   8  11 -35    5.25    0.72
   8  11 -10   -0.63    1.32
   8  12 -32    1.38    0.73
   8  13 -25    6.06    0.85
   8  13 -24    3.10    0.82
   8  13 -21    2.91    0.94
   9   4 -26    3.01    0.90
   9   4 -24    6.95    0.89
   9   4 -23    3.76    0.88
   9   4 -21    0.94    0.84
   9   4 -19   36.14    0.96
   9   5 -15   97.21    1.47
   9   6 -13   33.30    1.22
   9   7 -34   -0.30    0.90
   9   8 -34    1.18    0.92
   9   8 -12   22.78    1.17
   9   9 -33   16.06    1.04
   9   9 -13   10.52    1.30
   9  10 -31    4.75    1.01
   9  11 -27   20.86    1.04
   9  11 -26    0.17    1.08
   9  11 -25    0.65    1.18
   9  11 -24    2.11    1.21
   9  11 -23    0.49    1.25
   9  11 -22    2.11    1.31
   9  11 -21   32.34    1.50
   9  11 -20    1.93    1.25
   9  11 -19    4.68    1.06
   4  15  -8    0.79    0.84
   4  16 -16   -0.30    0.66
   5   9   3    4.45    0.71
   5  13  -3    0.92    1.04
   5  15 -12    7.61    0.97
   6   8   1    1.24    0.71
   6  12  -4   -0.19    1.13
   6  14 -11   -0.41    1.08
   7   9  -3    4.16    1.01
   7  10  -4   21.50    1.23
   7  11 -39    1.54    0.48
   7  12  -8    2.58    1.19
   7  13 -33    0.78    0.51
   7  13 -12    2.29    1.26
   7  14 -24    6.16    0.75
   7  14 -23   11.30    0.83
   7  14 -22    0.13    0.75
   7  14 -21   -0.50    0.78
   8   4 -11    1.03    0.66
   8   6  -7   51.26    1.05
   8   7  -7   21.53    1.07
   8   9 -38    0.14    0.71
   8  12 -31    1.11    0.69
   8  12 -30    7.18    0.86
   9   5 -29    3.18    0.95
   9   5 -16    6.29    0.81
   9   7 -14   -0.06    1.11
   9   8 -33   10.60    1.06
   9   8 -14    4.48    1.24
   9   8 -13    7.77    1.05
   9  10 -29    0.30    1.07
   9  10 -28   -0.92    1.08
   9  10 -18   96.71    1.87
   9  10 -16   -0.81    1.10
   4  10   4   22.75    0.85
   4  15  -9    1.55    0.86
   4  16 -24    1.09    0.46
   4  16 -23    3.47    0.54
   4  16 -22    3.22    0.57
   4  16 -21    1.15    0.59
   4  16 -20    6.23    0.66
   4  16 -19    0.81    0.65
   4  16 -18    3.95    0.72
   5   8   3    0.70    0.62
   5  10   2  351.51    2.21
   5  12  -1   13.64    0.92
   5  13  -4    1.40    1.08
   5  15 -29    0.43    0.48
   5  15 -14    2.77    0.94
   5  15 -13   46.63    1.18
   6   9   0   16.73    0.83
   6  10  -1    6.97    1.02
   6  13 -36    0.60    0.46
   6  14 -32   -0.06    0.37
   6  14 -32   -0.08    0.24
   6  14 -31    0.27    0.58
   6  14 -13    1.61    1.05
   7   8  -3   -0.40    0.69
   7  10 -40   -0.26    0.52
   7  10  -5    4.17    1.14
   7  11  -6    3.57    0.99
   7  12 -36   -1.32    0.48
   7  13 -32   20.00    0.71
   7  13 -31    0.51    0.69
   7  13 -14   32.99    1.40
   7  13 -13    2.28    1.06
   8   4 -12    2.50    0.67
   8   8  -8    1.40    1.07
   8   9 -37   48.79    1.04
   8   9  -8    4.65    1.05
   8  10 -10    4.50    1.30
   8  11 -33    8.20    0.90
   8  11 -13   47.80    1.63
   8  11 -12    4.50    1.13
   8  12 -29    1.45    0.93
   8  12 -28   32.92    1.19
   8  12 -18    2.29    1.25
   8  12 -17    2.13    1.29
   8  12 -16   27.46    1.31
   9   5 -28   -0.17    0.91
   9   5 -26   -0.61    0.96
   9   5 -20    1.79    0.95
   9   6 -31    7.29    0.98
   9   6 -30   49.08    1.29
   9   7 -15   24.72    1.23
   9   8 -32    2.97    0.89
   9   8 -31   -0.65    1.07
   9   8 -16    4.17    1.22
   9   9 -29    7.13    1.18
   9   9 -17   -0.25    1.32
   9  10 -27    2.18    1.00
   9  10 -26   -0.24    1.18
   9  10 -25    0.63    1.26
   9  10 -24  108.39    1.88
   3  16 -14    1.44    0.78
   3  16 -13   -0.06    0.69
   4  15 -10    1.98    0.87
   5   9   2   90.70    1.23
   5  11   0   19.98    1.08
   5  12  -2    1.58    1.09
   5  14  -8    0.69    1.03
   5  15 -28    0.15    0.57
   5  15 -16   55.87    1.25
   5  15 -15   14.30    1.05
   6   8   0  193.13    1.62
   6  11  -3   94.24    1.50
   6  14 -30   30.48    0.85
   6  14 -14    8.87    1.16
   7   6  -4    0.23    0.55
   7   9  -4   10.24    0.90
   7  12 -35    3.78    0.66
   7  12 -10    5.55    1.09
   7  13 -30   -0.80    0.77
   7  13 -16    1.99    1.22
   8   3 -18   41.75    0.91
   8   4 -13   -0.71    0.65
   8   5 -10   -0.36    0.57
   8   7  -9    6.22    0.94
   8   8  -9    1.32    1.07
   8   9 -36    0.09    0.82
   8  10 -35    2.80    0.83
   8  10 -11    3.28    1.08
   8  11 -32    1.62    0.93
   8  11 -14    0.33    1.31
   8  12 -26    6.71    1.00
   8  12 -25   25.34    1.26
   8  12 -24   -0.63    1.18
   8  12 -23    9.09    1.27
   8  12 -22  123.27    1.87
   8  12 -21    7.83    1.27
   8  12 -20    0.04    1.05
   8  12 -19    2.63    1.08
   9   5 -23    6.65    0.85
   9   5 -22   -1.25    0.78
   9   6 -29    5.63    1.05
   9   6 -28    0.60    1.07
   9   6 -19    6.17    1.11
   9   7 -29    2.76    1.08
   9   7 -18    3.29    1.11
   9   7 -16    0.25    0.90
   9   9 -21   11.87    1.34
   9   9 -19    9.51    1.16
   4  11   2    4.52    0.85
   4  12   0    9.62    0.95
   5   8   2  109.60    1.23
   5  10   1   -0.76    0.69
   5  14 -34    4.55    0.49
   5  14  -9    1.49    1.07
   5  15 -27    0.41    0.54
   5  15 -26    0.38    0.66
   5  15 -25    7.97    0.73
   5  15 -18    0.73    0.92
   5  15 -17    1.47    0.91
   6   8  -1   -0.18    0.72
   6   9  -1    4.65    0.73
   6  10  -2    4.42    0.85
   6  12 -38    0.37    0.48
   6  12  -6   10.12    1.04
   6  13 -35    0.95    0.54
   6  14 -29    0.69    0.69
   6  14 -16    1.22    1.10
   6  14 -15    1.91    0.87
   7   6  -5   28.97    0.89
   7   9 -40    0.60    0.64
   7   9  -5  105.57    1.49
   7  10 -39    0.02    0.62
   7  10  -6    3.34    0.94
   7  11 -37    0.40    0.64
   7  12 -11   18.02    1.20
   7  13 -29   58.84    1.11
   7  13 -28   12.07    0.97
   7  13 -27   -0.01    0.94
   7  13 -17    5.62    1.07
   8   3 -21   -0.06    0.64
   8   3 -20    3.61    0.65
   8   3 -19    3.47    0.54
   8   5 -12   12.85    0.83
   8   6 -10  233.47    1.87
   8   7 -10   23.53    1.08
   8   8 -36   10.52    0.91
   8   8 -10   20.16    1.20
   8  10 -34   27.90    1.07
   8  10 -13    7.81    1.30
   8  10 -12    5.85    1.11
   8  11 -30    3.61    1.01
   8  11 -16   41.65    1.60
   9   6 -27   87.98    1.47
   9   6 -25    6.62    1.05
   9   6 -20    0.30    0.88
   9   7 -28   -0.43    1.05
   9   7 -26    2.86    1.18
   9   7 -25    3.04    1.15
   9   7 -22    0.62    1.10
   9   7 -21  131.96    1.86
   9   7 -19    0.49    0.93
   9   8 -27    7.09    1.25
   9   8 -26    1.91    1.26
   9   8 -25    1.41    1.18
   9   8 -24   34.61    1.39
   9   8 -23    1.41    1.19
   9   8 -19   -1.08    1.01
   9   9 -22    2.85    1.15
   3  16 -24    6.74    0.55
   3  16 -17    0.83    0.72
   4  10   3   -0.07    0.57
   4  13  -3    1.08    0.97
   5   9   1    2.88    0.77
   5  11  -1  398.35    2.49
   5  12  -3   -0.40    0.87
   5  14 -33    3.43    0.54
   5  15 -24    2.78    0.65
   5  15 -23    3.37    0.82
   5  15 -22   12.59    0.90
   5  15 -21    3.14    0.88
   5  15 -20    0.94    0.74
   5  15 -19    8.18    0.82
   6   7  -1    2.38    0.54
   6  10  -3    4.39    1.04
   6  11 -40   -0.95    0.49
   6  11  -5    0.28    1.10
   6  12  -7    6.56    1.21
   6  13 -34    0.13    0.59
   6  14 -27    1.70    0.69
   6  14 -26    1.24    0.90
   6  14 -25   -0.70    0.87
   6  14 -20    0.01    1.05
   6  14 -19    0.58    1.07
   6  14 -18    2.05    1.09
   7   7  -5    9.56    0.72
   7   8  -5   87.34    1.30
   7  11 -36    3.65    0.78
   7  11  -9    0.22    1.03
   7  12 -33    0.78    0.67
   7  13 -26   -0.05    0.82
   7  13 -25    0.18    0.84
   7  13 -24    5.11    1.08
   7  13 -23   28.00    1.27
   7  13 -20   17.18    1.14
   8   5 -13  371.34    2.26
   8   7 -36   -0.02    0.89
   8   7 -11    5.21    1.00
   8   8 -11    7.09    1.09
   8   9 -35    0.04    0.77
   8  10 -32    0.25    1.02
   8  11 -28   10.57    1.22
   8  11 -17    2.59    1.12
   9   7 -24   22.12    1.14
   9   7 -23    0.41    0.97
   2  16 -13    3.33    0.70
   3  15  -9   15.73    0.95
   3  16 -23    4.02    0.59
   3  16 -22    0.88    0.57
   3  16 -21    5.54    0.65
   3  16 -20   -0.05    0.66
   3  16 -19   -0.67    0.70
   4  11   1    4.59    0.86
   4  12  -1    3.48    0.95
   4  15 -30    0.71    0.49
   4  15 -13   10.25    1.03
   5   8   1    2.77    0.63
   5  12  -4   89.63    1.58
   5  13 -37    4.90    0.50
   5  14 -32    2.78    0.62
   5  14 -12    5.66    1.17
   5  14 -11    4.54    0.99
   6  10 -41    0.84    0.54
   6  12 -37    0.80    0.59
   6  12  -8    1.38    1.14
   6  13 -33   22.44    0.83
   6  14 -24   32.12    1.05
   6  14 -23   -0.69    0.82
   6  14 -22   -0.29    0.89
   7   7  -6    8.54    0.85
   7   8  -6   22.96    0.92
   7   9 -39    4.50    0.78
   7   9  -7    5.70    1.10
   7  10  -8   14.70    1.06
   7  11 -35   11.51    0.92
   7  11 -11    5.17    1.33
   7  11 -10    2.34    1.05
   7  12 -32    4.33    0.74
   7  12 -31    0.46    0.93
   8   4 -17   19.31    0.83
   8   5 -14   21.91    0.93
   8   6 -13   10.84    0.91
   8   6 -12    0.61    0.69
   8   7 -35    1.61    0.92
   8   7 -12    7.67    1.03
   8   8 -35   -0.97    0.92
   8   9 -33    1.60    1.02
   8   9 -13    9.27    1.06
   8  10 -31   41.11    1.33
   8  10 -15   -0.40    1.05
   8  11 -26   -0.03    1.02
   8  11 -25   52.57    1.42
   8  11 -22   60.05    1.52
   2  16 -15    1.64    0.78
   2  16 -14    1.39    0.70
   3  15 -10   -0.17    0.89
   4   9   3    5.60    0.56
   4  10   2    2.62    0.71
   4  15 -29    3.55    0.51
   4  15 -28    0.06    0.59
   4  15 -15   -0.91    1.01
   4  15 -14    3.29    0.83
   5  10  -1   16.93    1.02
   5  12  -5    0.59    1.08
   5  13 -36   -0.38    0.53
   5  13  -8    1.96    1.23
   6   9  -3  253.55    1.98
   6  13 -32    1.13    0.64
   6  13 -31   -0.25    0.80
   7   7  -7    2.02    0.83
   7   9 -38   73.77    1.21
   7  10 -37    1.55    0.80
   7  11 -34    1.68    0.93
   7  11 -12    1.98    1.32
   7  12 -30    5.56    0.86
   7  12 -29    0.25    1.01
   8   4 -26    0.65    0.81
   8   4 -21    4.23    0.74
   8   4 -20   -0.29    0.72
   8   5 -16    5.92    0.84
   8   6 -33    3.32    0.96
   8   6 -14    0.93    0.87
   8   8 -14   -0.46    1.08
   8   9 -32   -0.25    1.13
   8   9 -15    4.06    1.29
   8  10 -29    2.44    1.17
   8  10 -28   20.29    1.33
   8  10 -19   43.77    1.57
   8  10 -17    2.11    1.09
   2  16 -17    0.73    0.71
   3  13  -2    1.37    0.93
   4  11   0    4.47    0.90
   4  15 -27   -0.71    0.64
   4  15 -26   24.70    0.86
   4  15 -18    1.51    0.99
   4  15 -16    3.15    0.87
   5  11 -41    1.08    0.49
   5  12 -39    0.32    0.48
   5  14 -30   -0.31    0.70
   5  14 -15    1.05    1.10
   5  14 -14    1.39    0.95
   6   8  -3    1.48    0.64
   6   9 -41   -0.22    0.71
   6   9  -4    1.69    0.92
   6  10 -40    3.25    0.67
   6  10  -5   19.07    1.02
   6  11 -38    0.35    0.68
   6  12 -35    2.09    0.76
   6  12 -10    1.80    1.20
   6  13 -30    2.68    0.88
   6  13 -16    0.44    1.26
   7   8  -8    7.28    0.98
   7  10 -36    0.15    0.86
   7  11 -33    0.96    0.94
   7  11 -13    0.19    1.13
   7  12 -28    0.16    0.91
   7  12 -26    4.95    1.25
   7  12 -21    1.98    1.27
   7  12 -20   84.59    1.81
   8   4 -25  104.51    1.30
   8   4 -24    7.73    0.71
   8   4 -23    0.95    0.64
   8   4 -22   69.88    1.11
   8   5 -30    3.00    0.90
   8   5 -29    7.85    0.92
   8   5 -18    4.21    0.82
   8   5 -17   13.31    0.87
   8   6 -32    0.20    0.96
   8   9 -17    9.14    1.34
   8   9 -16    3.28    1.06
   8  10 -27   -0.42    1.06
   8  10 -22   16.35    1.46
   8  10 -21    7.51    1.18
   2  15  -8    8.78    0.92
   2  16 -24    0.84    0.51
   2  16 -23   -0.67    0.55
   2  16 -22   44.61    0.90
   2  16 -21    0.37    0.64
   2  16 -20    0.72    0.71
   2  16 -19    5.02    0.77
   3  12   0   51.78    1.17
   3  15 -31    0.92    0.48
   3  15 -12   28.74    1.16
   4   9   2    3.01    0.55
   4  10   1   31.83    0.95
   4  12  -3  105.03    1.58
   4  13 -38   12.83    0.55
   4  13  -6    1.29    1.05
   4  14 -34    0.70    0.48
   4  14 -10    2.46    1.15
   4  15 -25    6.43    0.69
   4  15 -24    1.88    0.81
   4  15 -23   23.92    1.00
   4  15 -22    0.58    0.91
   4  15 -21    0.47    0.93
   4  15 -20   15.70    1.01
   4  15 -19    0.09    0.84
   5  12 -38    3.05    0.60
   5  13 -35    0.28    0.53
   5  13 -10    1.56    1.30
   5  14 -29    1.92    0.66
   5  14 -17   -0.04    1.16
   5  14 -16    8.12    1.02
   6   9  -5    0.55    0.85
   6  11 -37    0.40    0.74
   6  11  -8    1.54    0.96
   6  12 -11    5.32    1.09
   6  13 -29    3.82    0.81
   6  13 -28   -0.46    0.97
   6  13 -27   39.91    1.29
   6  13 -18   -0.55    1.29
   6  13 -17    3.73    1.12
   7   5 -10    0.84    0.64
   7   7  -8   20.24    0.83
   7   8  -9   -0.45    0.95
   7   9 -37    8.20    0.79
   7  10 -35   -0.78    0.91
   7  11 -32   15.12    0.95
   7  11 -31    9.63    1.11
   7  11 -15    5.05    1.39
   7  11 -14   26.72    1.29
   7  12 -24    0.32    1.03
   7  12 -23   29.97    1.27
   7  12 -22    4.44    1.10
   8   5 -27    0.22    0.91
   8   5 -21   -1.02    0.88
   8   5 -19  197.94    1.74
   8   6 -31   25.58    0.99
   8   6 -30   12.77    1.14
   8   6 -17    0.10    0.89
   8   6 -16    2.79    0.74
   8   7 -31  157.77    1.92
   8   7 -16   -0.57    0.82
   8   8 -17    1.04    1.12
   8   8 -16   18.29    1.09
   8   9 -18   15.28    1.18
   1  16 -15    0.70    0.75
   2  15  -9   -1.04    0.89
   3  15 -30    1.43    0.54
   3  15 -13    1.82    1.02
   4  11  -1    3.63    0.74
   4  14 -33    0.38    0.60
   4  14 -11   -0.84    1.17
   5   8  -1   29.28    0.84
   5  10 -42    0.06    0.53
   5  11 -40    0.54    0.57
   5  13 -34    4.03    0.61
   5  14 -26    2.64    0.84
   5  14 -25    3.50    0.99
   5  14 -24   -1.24    1.06
   5  14 -23    4.31    1.10
   5  14 -21    3.26    1.14
   5  14 -19   45.78    1.27
   5  14 -18    2.08    0.98
   6   9 -40    6.65    0.77
   6  10  -7    5.96    1.10
   6  12 -33    3.35    0.89
   6  12 -13   -0.31    1.30
   6  13 -26    3.49    0.93
   6  13 -25    7.38    0.99
   6  13 -24   40.43    1.40
   6  13 -23    9.53    1.23
   6  13 -22    1.09    1.22
   6  13 -21   14.87    1.17
   6  13 -20    0.47    1.08
   6  13 -19    1.65    1.04
   7   5 -11  210.40    1.64
   7   7 -37    1.01    0.90
   7  10 -34    0.59    0.85
   7  11 -30   -0.92    1.09
   7  11 -18    1.55    1.27
   7  11 -17   47.46    1.58
   7  11 -16    1.23    1.11
   8   5 -24    0.36    0.74
   8   6 -28    9.42    1.11
   8   6 -27    2.72    1.05
   8   6 -21    1.85    0.98
   8   6 -19   -0.64    0.80
   8   6 -18    0.46    0.82
   8   7 -30   -0.31    0.92
   8   7 -29    4.06    1.18
   8   7 -28   11.81    1.17
   8   7 -19  301.84    2.42
   8   8 -29    1.61    0.99
   8   8 -28   26.58    1.37
   8   8 -21   -0.03    1.21
   8   8 -19    0.44    0.97
   8   9 -25  101.60    1.70
   8   9 -23   -1.24    1.05
   8   9 -22   28.14    1.28
   1  16 -24    0.58    0.58
   1  16 -17   -0.20    0.71
   1  16 -16    0.75    0.72
   2  15 -10   18.58    1.04
   3  11   1    3.91    0.79
   3  12  -1   -0.13    0.88
   3  13  -4    7.35    1.02
   3  14 -35   -0.22    0.46
   3  15 -29    1.72    0.54
   3  15 -28    7.61    0.67
   3  15 -15   21.24    1.13
   3  15 -14    1.53    0.86
   4  10   0    6.72    0.68
   4  11 -42    2.10    0.47
   4  11  -2   28.08    1.10
   4  12  -4    4.29    1.07
   4  13 -37   -0.09    0.48
   4  14 -32    7.73    0.64
   4  14 -13   -0.87    1.16
   4  14 -12    1.42    0.99
   5   9  -2    2.69    0.65
   5  11  -5    0.34    0.87
   5  13 -33   -0.14    0.61
   6   7  -5    9.30    0.62
   6   9  -6    0.76    0.74
   6  10 -38    5.61    0.85
   6  11 -36   62.59    1.15
   6  11 -10    0.16    1.00
   6  12 -32    0.66    0.81
   6  12 -31    1.59    0.99
   6  12 -15    6.36    1.37
   7   7 -10    7.07    0.75
   7   8 -36    7.57    1.02
   7   9 -35   41.21    1.25
   7  10 -33    0.84    0.95
   7  10 -15    0.58    1.29
   7  10 -14   13.42    1.15
   7  11 -28    0.17    1.06
   7  11 -27   26.19    1.42
   7  11 -26  136.74    2.05
   7  11 -20   58.55    1.64
   8   6 -26    1.24    0.82
   8   6 -24   -0.16    0.82
   8   6 -23    0.21    0.83
   8   7 -27    6.26    0.97
   8   7 -26    0.89    0.94
   8   7 -25    3.85    1.13
   8   7 -24    0.32    1.10
   8   7 -23    6.86    1.14
   8   7 -22    0.42    0.89
   8   7 -21    7.17    0.95
   8   7 -20    0.89    0.89
   8   8 -25    2.09    0.99
   8   8 -23    0.87    1.00
   8   8 -22   69.62    1.47
   1  16 -23    1.85    0.55
   1  16 -22    0.09    0.60
   1  16 -21    0.07    0.65
   1  16 -19   -0.16    0.74
   1  16 -18    1.02    0.72
   2  15 -31   17.88    0.61
   2  15 -11    1.45    0.96
   3  10   2    2.68    0.69
   3  15 -27    3.27    0.63
   3  15 -26    0.44    0.75
   3  15 -18    4.57    1.01
   3  15 -17   -0.42    1.04
   3  15 -16   -0.75    0.84
   4  12  -5   89.38    1.59
   4  13 -36    7.95    0.65
   4  13  -8    1.43    1.13
   4  14 -31    0.04    0.59
   4  14 -30    3.56    0.78
   4  14 -14  101.73    1.77
   5   8  -2    0.94    0.63
   5   9 -42    2.12    0.71
   5   9  -3   15.64    0.90
   5  10 -41    3.31    0.66
   5  11 -39    1.68    0.69
   5  11  -6   11.33    0.99
   5  12 -36    0.04    0.75
   5  12  -9   -0.92    1.17
   5  13 -32    2.46    0.73
   6   8 -40    1.38    0.81
   6   8  -6   25.84    0.86
   6   9  -7    4.22    0.80
   6  10  -9   36.60    1.34
   6  11 -12    8.00    1.32
   6  11 -11    1.14    1.01
   6  12 -30   63.42    1.45
   6  12 -29    8.78    1.16
   6  12 -16    0.96    1.35
   7   3 -22   12.31    0.68
   7   5 -13    3.78    0.70
   7   7 -11   51.71    1.09
   7   8 -35    7.05    1.11
   7   8 -12    1.81    0.93
   7   9 -34    0.58    0.91
   7   9 -14   17.43    1.28
   7   9 -13    3.74    0.97
   7  10 -31   -0.01    0.97
   7  10 -30   -0.19    1.23
   7  10 -17   44.67    1.57
   2  15 -30    1.17    0.55
   3  13 -38    1.44    0.50
   3  14 -34   -0.19    0.50
   3  15 -25    4.76    0.72
   3  15 -24    6.66    0.78
   3  15 -23    5.30    0.92
   3  15 -22    3.84    0.95
   3  15 -20   -0.23    1.01
   4   9   0    0.71    0.54
   4  10 -43    0.36    0.50
   4  11  -3   10.81    0.98
   4  12 -39    0.41    0.50
   4  13 -35    6.90    0.74
   4  14 -29   -0.78    0.84
   4  14 -16   13.87    1.27
   4  14 -15    0.84    0.94
   5  11 -38   -0.02    0.75
   5  12 -35    1.00    0.84
   5  13 -30   -0.25    0.79
   5  13 -29    1.50    1.00
   6   9 -38    3.28    0.94
   6  10 -36   93.78    1.46
   6  10 -10   12.10    1.19
   6  11 -33    8.19    1.05
   6  11 -13    2.56    1.30
   6  12 -28    0.72    1.01
   6  12 -27    0.11    1.26
   7   6 -34    3.99    0.98
   7   6 -13    6.52    0.78
   7   7 -13   10.52    0.96
   7   7 -12   24.91    0.91
   7   9 -15    9.45    1.04
   7  10 -29    1.06    1.02
   7  10 -20    4.06    1.38
   7  10 -18    1.85    1.08
   0  16 -24    1.36    0.48
   0  16 -23   -0.26    0.49
   0  16 -22    0.03    0.55
   0  16 -21   -0.20    0.68
   0  16 -19    0.49    0.76
   0  16 -17    2.31    0.69
   1  15 -10    0.94    0.88
   2  15 -29    3.26    0.61
   2  15 -14    5.17    1.07
   2  15 -13  121.20    1.51
   3  13  -6   14.57    1.17
   3  14 -33    1.37    0.55
   4  10  -2  142.71    1.57
   4  12 -38   38.02    0.91
   4  12  -6    5.23    0.93
   4  13 -10    6.95    1.10
   4  14 -27   -0.24    0.83
   4  14 -25    2.29    1.04
   4  14 -20   43.37    1.42
   4  14 -19   -0.13    1.20
   4  14 -18    1.16    1.18
   4  14 -17    9.17    1.07
   5   9 -41    1.19    0.72
   5  11  -8   11.85    1.19
   5  12 -11   -0.51    1.00
   5  13 -28    9.00    0.97
   5  13 -27    0.75    1.12
   5  13 -26    2.10    1.13
   5  13 -19    3.10    1.37
   6   9 -37   -0.17    0.92
   6   9  -9    5.63    1.01
   6  10 -35   22.93    1.18
   6  11 -32    0.96    1.08
   6  11 -15    6.48    1.30
   6  11 -14    8.18    1.13
   6  12 -24   19.84    1.23
   6  12 -23   11.38    1.19
   7   4 -19    0.83    0.65
   7   4 -18    3.69    0.55
   7   5 -15    2.33    0.58
   7   6 -33   13.65    1.07
   7   7 -33    9.59    1.13
   7   8 -15    0.52    1.05
   7   8 -14   33.32    1.10
   7   9 -18   19.15    1.32
   7   9 -17  221.92    2.27
   7  10 -25    0.33    1.10
   7  10 -24   17.88    1.25
   7  10 -23  166.27    2.08
   7  10 -22    4.90    1.17
   7  10 -21   -0.89    1.12
   1  15 -31    0.59    0.47
   1  15 -11   15.09    1.00
   2  13  -4   85.20    1.43
   2  14 -35    1.99    0.51
   2  15 -28    6.94    0.61
   2  15 -27   -0.77    0.70
   3  10 -44   -0.38    0.50
   3  11  -1    0.25    0.67
   3  12 -40    0.49    0.51
   3  13 -37    0.50    0.48
   3  13  -7    1.46    1.14
   3  14 -32    0.03    0.57
   4   9  -1   18.50    0.72
   4  10 -42    2.07    0.62
   4  11 -40   -0.29    0.63
   4  13 -33    0.86    0.84
   4  13 -11  259.12    2.33
   4  14 -24   12.43    1.02
   4  14 -23   34.94    1.20
   4  14 -22    1.52    0.99
   4  14 -21    0.95    0.99
   5   9  -5    7.52    0.88
   5  10 -39    0.48    0.82
   5  11 -37   83.64    1.26
   5  12 -33    0.33    0.93
   5  12 -13    3.46    1.32
   5  12 -12    1.00    1.05
   5  13 -25    4.25    1.04
   5  13 -22   31.55    1.33
   5  13 -21   -0.16    1.11
   5  13 -20    1.54    1.13
   6   7 -38    0.38    0.82
   6   8 -38    0.14    0.89
   6   9 -10    7.37    1.00
   6  10 -34    5.99    1.14
   6  10 -12   40.25    1.26
   6  11 -31   -0.22    0.98
   6  11 -30   64.24    1.62
   6  11 -17    2.54    1.33
   6  11 -16    1.25    1.11
   7   4 -26  268.03    1.94
   7   4 -25   -0.88    0.75
   7   4 -22   21.56    0.86
   7   4 -21    2.40    0.65
   7   5 -31   -0.75    0.69
   7   5 -30   -0.47    0.90
   7   6 -31    4.92    1.01
   7   6 -16    1.73    0.80
   7   6 -15    0.68    0.63
   7   7 -16    6.59    0.97
   7   8 -31    0.66    1.18
   7   8 -30    2.30    1.17
   7   8 -17    1.11    1.08
   7   8 -16    0.17    0.86
   7   9 -28   13.18    1.14
   7   9 -26   32.53    1.50
   7   9 -25   -0.35    1.28
   7   9 -22   16.53    1.36
   7   9 -21   -1.07    1.32
   7   9 -20    3.15    1.23
  -1  16 -22    9.52    0.56
  -1  16 -21    1.77    0.62
  -1  16 -20   -0.02    0.64
  -1  16 -19    1.57    0.65
  -1  16 -18    2.61    0.60
  -1  16 -17    0.29    0.61
   1  15 -30    0.18    0.52
   1  15 -12    2.24    0.93
   2  15 -26    7.79    0.71
   2  15 -25   42.89    1.08
   2  15 -24    5.81    0.88
   2  15 -23    1.50    0.88
   2  15 -22   -0.45    0.94
   2  15 -20   -0.23    1.01
   2  15 -18    3.28    1.10
   2  15 -17    3.66    1.07
   3   9   1   17.20    0.69
   3  11 -42    0.72    0.53
   3  11  -2    2.23    0.84
   3  12  -4   10.68    0.88
   3  13 -36   -0.34    0.63
   3  13  -8    1.05    1.13
   3  14 -31    2.27    0.65
   3  14 -30   47.63    1.13
   4   9 -43   -0.20    0.61
   4   9  -2   11.82    0.77
   4  11  -5  145.43    1.65
   4  12  -8  393.80    2.69
   4  13 -13    0.59    1.23
   5   9 -40    6.17    0.86
   5  10 -38    2.77    0.89
   5  12 -32    0.00    0.86
   5  12 -31    8.38    1.12
   5  12 -14    2.26    1.07
   6   8 -37   -1.11    1.02
   6   8 -10   11.92    0.93
   6   9 -36    5.60    0.91
   6   9 -35   10.01    1.14
   6   9 -11   -0.03    0.82
   6  10 -33   20.44    1.24
   6  10 -14    4.94    1.24
   6  10 -13    3.74    1.02
   6  11 -28   -0.01    1.28
   6  11 -20    2.11    1.35
   6  11 -19    1.21    1.34
   6  11 -18    0.84    1.12
   7   5 -28    0.80    0.89
   7   5 -27    6.11    0.90
   7   6 -30   40.86    1.32
   7   6 -29    0.35    0.99
   7   6 -18   11.52    0.94
   7   7 -31    2.87    0.95
   7   7 -18    4.54    1.01
   7   7 -17   40.92    1.09
   7   8 -20  102.58    1.75
   7   8 -18    3.82    0.93
   7   9 -23   82.26    1.61
   1  15 -29   13.41    0.67
   1  15 -13    0.19    0.96
   2  12 -41    2.66    0.49
   2  13 -38    0.18    0.50
   2  13  -5    3.29    0.99
   3  13 -35    0.00    0.71
   3  14 -29    4.87    0.77
   3  14 -16   18.01    1.27
   3  14 -15   12.18    1.28
   4  10 -41    7.83    0.78
   4  11 -39    7.72    0.78
   4  12 -36    1.48    0.71
   4  13 -31    5.78    0.84
   4  13 -30    1.03    1.04
   5   9 -39    0.00    0.85
   5   9  -6    1.29    0.70
   5  11 -35    1.38    0.82
   5  12 -30    2.44    0.99
   5  12 -29   -0.40    1.18
   5  12 -17    7.76    1.40
   5  12 -16    3.75    1.37
   6   6 -10    0.63    0.64
   6   7 -10    3.85    0.75
   6   8 -36   37.67    1.32
   6   8 -11    0.28    0.90
   6   9 -34    0.37    1.12
   6   9 -12   35.34    1.12
   6  10 -31    1.16    1.27
   6  11 -23    1.30    1.10
   6  11 -22   -0.56    1.09
   6  11 -21    2.66    1.12
   7   5 -26   14.04    0.83
   7   5 -24    2.30    0.82
   7   5 -23   88.56    1.27
   7   5 -22   12.75    0.78
   7   5 -21    1.01    0.66
   7   6 -27   -0.04    1.00
   7   6 -26   24.05    1.12
   7   6 -22   -0.12    0.90
   7   6 -21    3.10    0.94
   7   7 -28    6.55    0.98
   7   7 -25    0.69    1.07
   7   7 -22    3.23    1.06
   7   7 -19    2.31    0.82
   7   8 -26   30.45    1.20
   7   8 -25    1.90    0.99
   7   8 -21    1.02    0.94
   0  15 -31    0.55    0.43
   0  15 -11   -0.10    0.82
   1  14 -35    0.56    0.50
   1  15 -28    1.21    0.59
   1  15 -27   -0.34    0.69
   1  15 -15   -0.04    1.05
   2  11   0    5.39    0.77
   2  13  -6    4.56    1.01
   3  10 -43    1.87    0.56
   3  11 -41    0.63    0.59
   3  12 -38    0.91    0.67
   3  14 -27   -0.04    0.82
   3  14 -26    1.04    1.05
   3  14 -25    9.81    1.13
   3  14 -19    2.16    1.21
   3  14 -18  111.18    1.84
   3  14 -17    3.92    1.04
   4   9 -42    8.55    0.79
   4  11 -38    1.29    0.87
   4  11  -7   11.27    1.13
   4  12 -35    2.15    0.73
   4  13 -29   73.07    1.38
   4  13 -28    8.74    1.18
   5   9  -7   59.08    1.12
   5  10 -37   13.08    0.87
   5  10  -9   -0.80    0.83
   5  11 -34    2.31    0.89
   5  11 -33    8.46    1.14
   5  11 -13   60.37    1.56
   5  11 -12   -1.16    0.98
   5  12 -27    1.30    1.24
   5  12 -26    2.22    1.32
   5  12 -25   44.76    1.57
   5  12 -19    1.32    1.35
   5  12 -18    6.84    1.18
   6   7 -11    4.15    0.76
   6   8 -12  152.46    1.72
   6   9 -13    0.63    0.88
   6  10 -18   69.14    1.69
   7   6 -24    8.75    0.86
   0  15 -30    3.16    0.51
   0  15 -12    0.49    0.92
   1  14 -34    0.55    0.56
   1  15 -26    0.13    0.63
   1  15 -25    1.53    0.81
   1  15 -24   -0.18    0.83
   1  15 -18    1.31    1.02
   1  15 -16    2.78    0.86
   2  10 -44    0.78    0.55
   2  10   1    5.00    0.66
   2  12 -40   16.59    0.67
   2  13  -7   13.74    1.11
   3  11  -4    7.25    0.95
   3  13 -33    5.37    0.93
   3  14 -24   86.02    1.50
   3  14 -23   -0.20    0.98
   3  14 -22    2.71    0.98
   3  14 -20    1.39    1.03
   4  10 -40   -1.43    0.67
   4  10  -5    0.84    0.70
   4  11  -8   38.32    1.32
   4  12 -34    0.85    0.79
   4  12 -12   -0.35    1.17
   4  12 -11    3.75    0.99
   4  13 -27    2.16    1.00
   4  13 -26    7.89    1.09
   4  13 -23   65.09    1.74
   4  13 -22    2.08    1.38
   5   8 -39    2.11    0.95
   5   9 -38    1.59    0.96
   5  11 -32    1.85    1.19
   5  11 -14    1.69    1.27
   6   6 -12   12.88    0.76
   6   7 -35   -0.18    0.99
   6   8 -13    3.08    0.78
   6   9 -15   12.25    1.00
   6  10 -27  156.43    2.04
   6  10 -26   44.72    1.59
   6  10 -25    0.72    1.42
   6  10 -24  242.85    2.54
   6  10 -22   13.17    1.50
   6  10 -21   -0.39    1.29
   6  10 -19   13.42    1.16
   0  14 -35   -0.23    0.45
   0  15 -29   -0.46    0.48
   0  15 -28    2.02    0.62
   0  15 -13    1.16    0.94
   1  12 -41    1.95    0.47
   1  13 -38    0.83    0.50
   1  13  -4   13.05    0.95
   1  14 -33    0.63    0.64
   1  15 -23   16.56    0.95
   1  15 -22    1.14    0.82
   1  15 -19    0.78    0.90
   2  13 -36    0.15    0.56
   2  14 -30    0.83    0.73
   2  14 -14   -0.56    1.23
   3  10 -42   11.77    0.74
   3  10  -2    2.66    0.60
   3  11 -40    0.94    0.63
   3  12 -37   -0.04    0.65
   3  12  -7    8.63    0.92
   3  13 -32    5.06    0.97
   4   9  -4    3.19    0.62
   4  10 -39    0.85    0.90
   4  10  -6    0.86    0.86
   4  11 -36    3.40    0.94
   4  11  -9    0.09    1.11
   4  12 -13    1.90    1.27
   5   7 -39    3.08    0.91
   5   9 -37   95.10    1.58
   5   9  -9    0.19    0.72
   5  10 -35    9.08    0.93
   5  10 -12    1.51    1.04
   5  11 -30    0.25    1.30
   5  11 -16    9.96    1.40
   5  11 -15   12.04    1.15
   6   6 -34    5.18    1.01
   6   6 -13    3.86    0.68
   6   7 -34   -0.99    1.04
   6   7 -13    2.07    0.67
   6   8 -15   -0.40    0.96
   6   9 -30   -0.90    1.00
   6   9 -29    0.99    1.27
   6   9 -18   23.82    1.34
   6   9 -17    3.60    0.97
  -1  15 -29    0.08    0.52
   0  15 -27    3.16    0.70
   0  15 -26    1.37    0.74
   0  15 -14    0.80    0.93
   1  11 -43    0.14    0.46
   1  13  -5   27.12    1.12
   2  11  -2    2.13    0.83
   2  12 -39    0.36    0.57
   2  13 -35    1.94    0.77
   2  13  -8   10.55    0.97
   2  14 -28   15.94    1.03
   2  14 -16    6.83    1.31
   2  14 -15    1.49    1.04
   3   9 -43    1.79    0.69
   3  11 -39   55.12    1.16
   3  12  -8    2.81    0.91
   3  13 -31    0.86    0.85
   3  13 -30   -0.37    1.02
   3  13 -14    0.81    1.27
   3  13 -13    0.70    1.08
   4   9 -40    1.09    0.90
   4  10 -38  222.88    2.00
   4  11 -35    8.99    1.05
   4  12 -31    4.80    1.00
   4  12 -30    1.82    1.19
   4  12 -15   17.95    1.43
   4  12 -14  179.01    2.09
   5   8 -38    4.42    0.87
   5   8  -8    1.37    0.60
   5   9 -36    0.22    1.12
   5   9 -10   13.50    0.86
   5  10 -34   15.73    1.07
   5  10 -33    9.15    1.27
   5  10 -13   37.28    1.35
   5  11 -29   27.16    1.32
   5  11 -19   12.92    1.45
   5  11 -18    1.41    1.30
   6   5 -32    6.45    0.93
   6   6 -33    3.60    0.99
   6   7 -32    5.46    1.13
   6   7 -15   29.86    1.03
   6   7 -14    6.54    0.72
   6   8 -31    0.70    1.15
   6   8 -30    4.79    1.20
   6   8 -17    0.59    0.97
   6   9 -28    0.79    1.05
   6   9 -27   40.51    1.36
   6   9 -25    2.98    1.30
   6   9 -21   12.93    1.32
   6   9 -19    8.66    1.06
  -1  15 -28    5.59    0.62
  -1  15 -12    1.08    0.86
   0  14 -34    0.36    0.47
   0  15 -25   -0.15    0.80
   0  15 -24   -0.01    0.88
   0  15 -23    5.04    0.91
   0  15 -22    8.85    0.98
   0  15 -19   -0.65    1.03
   0  15 -18    2.47    1.04
   0  15 -17   -0.34    1.06
   1  13 -37   -0.14    0.51
   1  13  -6    4.45    0.95
   2  10 -43   -1.07    0.60
   2  12 -38    3.09    0.75
   2  13 -34    1.38    0.82
   2  13  -9    7.45    0.95
   2  14 -26    0.84    0.90
   2  14 -25    3.73    1.10
   2  14 -24    0.07    1.16
   2  14 -21    4.22    1.24
   2  14 -20    0.59    1.22
   2  14 -19    0.14    1.25
   2  14 -18    6.84    1.24
   3  10 -41    1.24    0.66
   3  11  -6   19.93    1.07
   3  12 -35    0.61    0.89
   3  13 -29    1.65    0.92
   3  13 -28    2.60    1.17
   4   8 -41   18.11    0.96
   4  12 -16    1.88    1.10
   5   8 -37    5.13    1.08
   5   9 -11    4.96    0.81
   5  10 -15    1.56    1.14
   5  11 -25    7.19    1.18
   5  11 -24    0.98    1.10
   5  11 -23    7.99    1.17
   5  11 -21    4.76    1.14
   5  11 -20    4.10    1.13
   6   5 -31    2.86    0.88
   6   6 -32    1.89    0.87
   6   6 -16    6.68    0.78
   6   7 -31    2.66    1.07
   6   7 -30    0.14    1.07
   6   7 -17    9.07    0.93
   6   7 -16    8.14    0.76
   6   8 -29   -0.25    1.00
   6   8 -20    8.69    1.08
  -2  15 -29    5.71    0.50
  -1  15 -27    0.11    0.62
  -1  15 -14    7.65    0.98
  -1  15 -13   78.85    1.32
   0  12 -41    0.60    0.45
   0  13 -38    0.83    0.43
   0  14 -33    1.22    0.64
   0  15 -21   89.58    1.39
   0  15 -20   -1.32    0.86
   1  10 -44    2.48    0.50
   1  11 -42    0.38    0.52
   1  14 -30   -0.17    0.82
   2   9 -44    4.06    0.65
   2  10  -1    5.64    0.69
   2  12  -6    7.37    1.04
   2  13 -33    1.13    0.77
   2  13 -11   12.66    1.26
   2  13 -10   -1.19    0.90
   3  10 -40    1.29    0.86
   3  10  -4    0.17    0.65
   3  11 -38    1.28    0.76
   3  12 -34    1.15    0.84
   3  12 -11   18.50    1.29
   3  12 -10    3.69    0.98
   3  13 -27   60.08    1.41
   3  13 -25    0.15    1.34
   3  13 -24    3.40    1.34
   3  13 -23    3.94    1.36
   4   8 -40    5.09    0.96
   4   9 -39    0.05    0.77
   4  10 -37    2.04    0.88
   4  11 -33    1.99    1.20
   4  11 -12    1.28    1.09
   4  12 -21    0.84    1.49
   4  12 -18    6.33    1.23
   5   9 -12    4.42    0.81
   5  10 -16   22.29    1.16
   6   4 -26    1.19    0.57
   6   4 -24   38.34    0.94
   6   4 -23    1.41    0.66
   6   4 -22    7.45    0.67
   6   4 -21   27.01    0.74
   6   5 -29    0.00    0.88
   6   6 -18   77.70    1.26
   6   7 -29    3.29    0.95
   6   7 -28    0.30    1.13
   6   7 -19    0.96    0.91
   6   7 -18   42.78    1.06
   6   8 -26    2.02    0.98
   6   8 -25    2.30    0.98
   6   8 -24   55.82    1.35
   6   8 -22    8.56    0.98
   6   8 -21    4.59    0.93
  -2  15 -27   -1.01    0.53
  -1  15 -26   -0.24    0.61
  -1  15 -25    3.36    0.74
  -1  15 -24    1.59    0.78
  -1  15 -17    0.80    0.96
   0  13 -37    0.06    0.59
   0  14 -32   -0.56    0.68
   1   9 -45   -0.15    0.56
   1  14 -29    2.11    0.79
   1  14 -28    2.70    1.00
   1  14 -15    1.22    1.21
   2  10 -42    0.50    0.73
   2  11 -40    3.17    0.68
   2  13 -32    0.80    0.84
   2  13 -31   53.35    1.31
   3   9 -41    0.86    0.82
   3  11 -37    7.41    0.82
   3  12 -33   -0.01    0.90
   3  12 -32    3.13    1.12
   4   7 -40    3.35    1.01
   4  10 -10    2.65    0.99
   4  11 -32   93.82    1.65
   4  11 -31    0.57    1.26
   4  11 -14   65.85    1.61
   4  11 -13    6.15    1.01
   5   6 -36    0.99    0.93
   5   7 -36    0.56    1.05
   5   7 -10    4.36    0.58
   5   8 -11    3.22    0.68
   5   9 -14    3.28    1.03
   5   9 -13   15.92    0.93
   5  10 -28   40.14    1.41
   5  10 -27   16.19    1.47
   5  10 -26    1.13    1.37
   5  10 -19  171.24    2.14
   6   5 -27   93.36    1.32
   6   5 -26    2.37    0.80
   6   5 -25    4.79    0.83
   6   5 -20    6.95    0.65
   6   6 -28    0.76    0.82
   6   6 -27    5.16    0.94
   6   6 -25    3.06    0.94
   6   6 -24   91.91    1.46
   6   6 -22    2.59    0.88
   6   6 -21    1.18    0.85
   6   6 -20    0.35    0.67
   6   7 -26   -0.37    0.88
   6   7 -25    1.85    0.90
   6   7 -24   12.12    0.97
   6   7 -23    0.60    0.86
   6   7 -22   -0.19    0.79
   6   7 -20    1.00    0.77
  -2  15 -26    6.87    0.67
  -2  15 -14    3.45    0.84
  -1  13 -38    7.63    0.49
  -1  14 -33    0.72    0.58
  -1  15 -23   -0.72    0.70
  -1  15 -22    3.65    0.88
  -1  15 -21    1.16    0.92
  -1  15 -20    5.61    1.02
  -1  15 -19   42.08    1.27
   0  12 -40    0.83    0.54
   0  14 -31    0.14    0.75
   1  12 -38   28.22    0.91
   1  12  -4    1.53    0.90
   1  13 -34   -0.10    0.84
   1  14 -25    0.83    1.06
   2   9 -43   18.67    0.86
   2  11 -39    0.13    0.87
   2  12 -36    0.26    0.71
   2  12  -8    0.10    1.03
   2  13 -30    1.56    1.04
   2  13 -14    2.21    1.24
   2  13 -13    4.37    1.06
   3  10 -39    1.15    0.73
   3  11 -36   15.21    0.96
   3  11  -8   -0.78    0.83
   3  12 -31    6.33    1.21
   3  12 -13   -0.68    0.98
   4   8 -39   -0.19    0.97
   4   9 -37    0.18    1.11
   4  10 -35   14.94    1.07
   4  10 -34   13.63    1.27
   4  11 -30    1.91    1.33
   4  11 -16   15.44    1.38
   4  11 -15    3.97    1.04
   5   6 -35    1.32    0.96
   5   7 -35    5.25    1.14
   5   8 -12    0.95    0.69
   5   9 -31   12.17    1.12
   5   9 -15    0.82    0.85
   5  10 -25   78.71    1.66
   5  10 -24   -1.42    1.11
   5  10 -23    3.26    1.14
   5  10 -21    1.04    1.10
  -3  15 -26   -0.78    0.52
  -2  14 -33   -0.32    0.50
  -2  15 -25    4.49    0.61
  -2  15 -24    0.41    0.71
  -2  15 -23   16.50    0.84
  -2  15 -16   -0.50    0.93
  -1  13 -37   11.27    0.62
  -1  14 -32   -0.09    0.63
   0  10 -44    1.27    0.49
   0  11 -42   12.90    0.63
   0  13 -36   12.05    0.67
   0  13  -6   25.56    1.10
   0  14 -30   24.61    0.89
   1  10 -43    0.91    0.65
   1  12  -5    3.55    0.96
   1  13 -33    7.84    0.91
   1  14 -24    4.19    0.98
   1  14 -23   -0.40    0.98
   1  14 -22    0.60    1.02
   1  14 -20   43.28    1.37
   1  14 -19    0.33    1.00
   1  14 -18    0.36    1.07
   2  10 -41    2.83    0.79
   2  11 -38    0.45    0.84
   2  12 -35    0.18    0.79
   2  13 -29    2.72    0.98
   2  13 -28    5.37    1.19
   2  13 -15    1.03    1.20
   3  10  -6  326.92    2.20
   3  11 -35    3.29    0.94
   3  11  -9  235.71    2.10
   3  12 -29    0.47    1.28
   3  12 -16   18.11    1.39
   3  12 -15   33.91    1.48
   3  12 -14    0.00    1.03
   4   9 -36    6.61    1.22
   4   9  -9    3.09    0.80
   4  10 -33    0.40    1.30
   4  10 -12    0.03    1.00
   4  11 -26   32.60    1.55
   4  11 -19    5.54    1.35
   4  11 -18    5.83    1.37
   4  11 -17    4.09    1.09
   5   6 -34    5.00    0.98
   5   7 -12    0.78    0.57
   5   8 -14   -0.13    0.70
   5   9 -28   77.29    1.78
   5   9 -18   -0.74    1.10
   5   9 -17    0.24    0.85
  -3  15 -25    0.24    0.56
  -3  15 -24    2.33    0.61
  -2  15 -22    5.47    0.82
  -2  15 -21    0.02    0.84
  -2  15 -19    1.21    0.91
  -2  15 -18    0.38    0.93
  -1  12 -40   10.59    0.59
  -1  14 -31    0.22    0.70
   0  13 -35    1.15    0.75
   0  14 -28    1.90    0.92
   0  14 -14    0.81    1.21
   1   9 -44    0.04    0.65
   1  11 -40    2.36    0.79
   1  12 -37   -0.06    0.69
   1  13 -10   -0.74    0.89
   2   9 -42    2.93    0.86
   2  10  -3   36.91    0.96
   2  11  -6    4.87    0.94
   2  12 -34   45.84    1.19
   2  13 -27    2.28    1.07
   2  13 -26    3.03    1.12
   2  13 -25   28.84    1.50
   2  13 -23    7.05    1.41
   3   8 -41    2.51    0.90
   3   9 -39   20.62    1.11
   3   9  -5    6.15    0.74
   3  10 -37   -0.45    1.05
   3  10  -7    0.55    0.70
   3  11 -34    1.48    0.98
   3  11 -11    2.61    1.12
   3  12 -28   20.61    1.25
   3  12 -27    4.21    1.34
   3  12 -18   26.53    1.60
   3  12 -17    0.81    1.16
   4   9 -10    8.66    0.76
   4  10 -14  118.52    1.74
   4  11 -25    1.05    1.13
   4  11 -23   21.02    1.31
   4  11 -22    5.48    1.17
   4  11 -21    4.33    1.18
   5   5 -33   -0.16    0.86
   5   6 -33    2.74    1.06
   5   7 -33    3.75    0.93
   5   7 -32    6.33    1.12
   5   8 -31  125.08    1.81
   5   8 -16  127.50    1.66
   5   8 -15    1.32    0.73
   5   9 -27    7.52    1.12
   5   9 -26    0.72    1.06
   5   9 -25  133.78    1.89
   5   9 -24   10.54    1.35
   5   9 -23    5.46    1.24
   5   9 -22   -0.44    1.01
   5   9 -20    2.98    0.98
  -4  15 -23    1.35    0.55
  -4  15 -22    5.40    0.69
  -3  15 -23    1.30    0.69
  -3  15 -22    0.57    0.71
  -3  15 -21   26.30    0.92
  -3  15 -20    2.37    0.75
  -3  15 -19    1.79    0.78
  -3  15 -18    1.50    0.83
  -3  15 -17    2.87    0.83
  -2  13 -37    1.58    0.50
  -2  14 -32    2.84    0.52
  -1  13 -36    0.52    0.64
  -1  14 -30    0.18    0.77
   0   9 -45    3.33    0.54
   0  11 -41    0.48    0.64
   0  14 -27   17.11    0.98
   0  14 -26   -0.65    0.99
   0  14 -25    2.39    1.06
   0  14 -15   18.44    1.32
   1  10 -42    1.34    0.61
   1  12 -36    1.00    0.86
   1  13 -31    0.99    0.86
   1  13 -30    1.74    1.07
   1  13 -12    8.15    1.25
   2  11 -37   58.70    1.22
   2  12 -33    6.70    0.98
   2  12 -32    3.46    1.17
   3   7 -41   -0.29    0.87
   3   8 -40    9.66    1.05
   3  10  -8    3.68    0.88
   3  11 -33   62.59    1.47
   3  11 -32   -0.27    1.30
   3  12 -22    1.01    1.17
   3  12 -21   21.06    1.33
   3  12 -20    3.36    1.19
   4  10 -30   -0.57    1.37
   5   6 -32    2.03    1.07
   5   7 -31  162.33    2.01
   5   7 -15   20.65    0.82
   5   8 -29    0.87    0.97
   5   8 -27   -0.58    1.14
   5   8 -19    3.35    1.03
   5   8 -18   -0.42    0.94
   5   8 -17   12.83    0.89
  -4  15 -21   -0.61    0.61
  -4  15 -20    1.00    0.65
  -4  15 -19   47.27    0.98
  -4  15 -18    0.12    0.67
  -3  14 -32   -0.21    0.50
  -2  12 -40   -0.65    0.46
  -2  13 -36   -0.13    0.56
  -2  14 -31    0.81    0.64
  -1  10 -44    1.78    0.48
  -1  11 -42    2.20    0.54
  -1  13 -35    1.01    0.74
  -1  14 -29    0.44    0.71
  -1  14 -28   15.34    0.97
   0  10 -43    5.81    0.66
   0  12  -4   -0.76    0.85
   0  13 -33   21.31    1.00
   0  13  -8   16.02    0.95
   0  14 -24   15.93    1.07
   0  14 -22    2.25    1.20
   0  14 -21   11.35    1.30
   0  14 -20    3.52    1.25
   0  14 -19    5.70    1.34
   0  14 -18    4.89    1.15
   1   9 -43   -0.02    0.75
   1  10 -41    0.91    0.81
   1  10  -1    0.86    0.62
   1  11 -39    0.60    0.74
   1  12 -35    4.99    1.02
   1  12  -7    1.72    0.97
   1  13 -13    7.68    1.25
   2  10 -39    8.64    0.90
   2  11 -36    3.07    0.90
   2  11  -7   14.56    0.90
   2  12 -31   -0.95    1.19
   2  12 -13   10.96    1.27
   2  12 -12    1.51    1.00
   3  10  -9  113.08    1.56
   3  11 -31    4.75    1.16
   3  11 -14    1.19    1.19
   3  11 -13    9.01    1.02
   4   6 -37    2.74    0.94
   4   7 -37    2.16    0.86
   4   9 -13    0.42    0.89
   4   9 -12    1.89    0.74
   4  10 -29   35.38    1.39
   4  10 -28    1.22    1.15
   4  10 -27    0.89    1.41
   4  10 -19    9.63    1.30
   4  10 -17    7.07    1.05
   5   5 -31   26.09    1.08
   5   5 -30    4.92    0.89
   5   6 -31    1.43    0.85
   5   6 -30    0.32    1.02
   5   6 -16    4.31    0.71
   5   7 -30    0.59    0.93
   5   7 -29    6.25    1.17
   5   7 -28   21.29    1.22
   5   7 -17   45.68    1.10
   5   7 -16    3.27    0.67
   5   8 -26   11.80    1.06
   5   8 -25  121.96    1.74
   5   8 -24    1.86    0.95
   5   8 -23    1.03    0.89
   5   8 -22    8.52    0.95
   5   8 -21    5.72    0.90
  -3  13 -36   -0.62    0.45
  -3  14 -31   -0.97    0.53
  -2  14 -30    0.87    0.59
  -2  14 -10    0.39    0.93
  -1   9 -45    0.34    0.50
  -1  14 -27    1.23    0.94
  -1  14 -26   -2.23    0.96
  -1  14 -14    3.28    1.23
   0   9 -44    0.63    0.62
   0  12 -37    4.56    0.70
   0  13 -32    1.63    0.96
   0  13 -10   12.88    1.19
   0  13  -9   66.89    1.34
   1  11 -38   11.89    0.99
   1  11  -4    1.75    0.68
   1  12 -34    3.87    1.03
   1  12  -8   66.18    1.43
   1  13 -28    4.17    1.06
   1  13 -27   -0.99    1.23
   1  13 -16    2.27    1.33
   1  13 -15    3.53    1.34
   2   8 -42   -0.20    0.81
   2   9 -40   15.20    1.06
   2  10 -38    5.75    1.06
   2  10  -5    0.64    0.75
   2  12 -30    2.54    1.07
   2  12 -29    2.72    1.33
   2  12 -14    4.67    1.26
   3   7 -40   10.98    1.04
   3   9 -37    7.16    1.18
   3   9  -7   12.05    0.71
   3  10 -34    0.53    1.25
   3  10 -10    0.90    0.81
   3  11 -16   16.88    1.37
   3  11 -15  223.91    2.27
   4   7 -36    1.59    0.93
   4   8 -34    2.97    1.27
   4   9 -31   -0.02    1.30
   4  10 -26    5.75    1.19
   4  10 -25    9.29    1.22
   4  10 -24    7.83    1.21
   4  10 -23   73.57    1.63
   4  10 -22    6.81    1.17
   4  10 -21    5.66    1.10
   4  10 -20   13.20    1.17
   5   5 -29   34.63    1.10
   5   5 -28    1.51    0.82
   5   6 -29   -1.64    0.94
   5   6 -28    7.68    1.00
   5   6 -18    1.49    0.73
   5   6 -17    2.18    0.60
   5   7 -27    7.56    0.96
   5   7 -26    1.61    1.09
   5   7 -25    5.12    1.09
   5   7 -24   -0.04    1.03
   5   7 -23   15.24    1.04
   5   7 -22    0.91    0.94
   5   7 -20    0.50    0.85
  -3  14 -30   18.83    0.74
  -2  12 -39    2.68    0.56
  -2  13 -35   12.47    0.73
  -2  14 -29    1.83    0.67
  -2  14 -28    0.51    0.83
  -2  14 -11   15.44    1.08
  -1  10 -43    2.45    0.59
  -1  12 -38    7.42    0.62
  -1  13 -33    0.32    0.82
  -1  13  -7    4.34    1.01
  -1  14 -25    2.21    1.06
  -1  14 -24   -1.40    1.11
  -1  14 -23   -0.67    1.13
  -1  14 -15   -0.23    1.18
   0   8 -45    0.68    0.63
   0  10 -42   48.75    1.03
   0  12 -36   44.47    1.17
   0  12  -5    5.35    0.91
   0  13 -31    0.16    0.87
   0  13 -30    7.99    1.13
   1   9 -42   12.04    0.96
   1  10 -40   -0.40    0.91
   1  10  -2   14.99    0.73
   1  11 -37    1.16    1.00
   1  12 -33    8.57    1.19
   1  12  -9    0.54    1.01
   1  13 -25    5.76    1.19
   1  13 -24    0.24    1.18
   1  13 -23   44.74    1.70
   1  13 -17    2.18    1.10
   2   7 -42   -0.18    0.84
   2   8 -41    2.20    0.93
   2  10 -37   19.65    1.23
   2  10  -6    3.52    0.84
   2  11 -34   39.91    1.32
   2  12 -17   11.78    1.44
   2  12 -15    3.10    1.06
   3  10 -11    6.06    0.84
   3  11 -27  224.23    2.42
   3  11 -26    7.04    1.40
   3  11 -25    0.59    1.40
   3  11 -19   -1.07    1.35
   3  11 -18    3.46    1.31
   3  11 -17   -0.14    1.06
   4   7 -35    3.18    0.91
   4   8 -33    1.85    1.25
   4   9 -30   -0.62    1.09
   4   9 -29   71.82    1.78
   4   9 -16    9.70    1.09
   4   9 -15   -0.95    0.82
   5   4 -25    1.15    0.64
   5   4 -24    3.34    0.66
   5   5 -27    1.25    0.79
   5   6 -27   -0.22    0.76
   5   6 -26    5.51    0.93
   5   6 -25   44.26    1.20
   5   6 -23    6.48    0.90
   5   6 -22  171.05    1.74
   5   6 -20   -0.05    0.64
   5   6 -19   22.58    0.81
  -4  14 -30   -0.14    0.49
  -3  12 -39   -0.02    0.46
  -3  13 -35    0.71    0.57
  -3  14 -29    1.60    0.68
  -2  13 -34   -0.40    0.73
  -2  14 -27   -0.49    0.88
  -1  12 -37   10.57    0.87
  -1  13 -32    0.50    0.90
  -1  13  -8   18.48    1.14
  -1  14 -22  115.74    1.69
  -1  14 -21    3.42    1.09
  -1  14 -19    0.17    1.13
   0  11 -39   20.62    0.87
   0  12  -6   34.71    1.18
   1   8 -43    0.73    0.83
   1  10 -39    1.32    0.96
   1  10  -3   56.62    1.04
   1  11 -36    8.75    1.11
   1  12 -32   24.06    1.19
   2   9  -4    4.05    0.56
   2  10  -7   16.01    0.91
   2  11 -33   11.04    1.15
   2  11 -32   11.28    1.37
   2  11 -10   16.22    1.00
   2  12 -22   43.40    1.76
   2  12 -21   10.22    1.52
   2  12 -20    1.44    1.17
   2  12 -19    0.48    1.17
   2  12 -18    1.62    1.15
   3   9  -9    4.74    0.80
   3  10 -12    3.63    0.84
   3  11 -23    1.35    1.16
   3  11 -22    4.65    1.21
   3  11 -21  215.81    2.38
   4   5 -35   26.14    1.13
   4   6 -35    0.92    1.03
   4   7 -34    8.62    1.00
   4   8 -32   39.80    1.33
   4   8 -31    2.82    1.25
   4   9 -28    4.68    1.12
   4   9 -27    2.44    1.17
   4   9 -25   -1.11    1.25
   4   9 -20   25.38    1.30
   4   9 -19    3.72    1.14
   4   9 -18    5.55    0.93
   5   5 -24    0.78    0.63
   5   5 -23   22.95    0.81
  -4  14 -29    1.17    0.54
  -2  10 -43    0.10    0.52
  -2  12 -38    8.51    0.62
  -2  13 -33    0.33    0.80
  -2  14 -25    0.54    0.94
  -2  14 -24    2.76    1.01
  -2  14 -15   -0.80    1.16
  -1   9 -44   11.95    0.73
  -1  10 -42    7.86    0.74
  -1  11 -40    3.51    0.62
  -1  13 -31   15.94    1.10
   0   8 -44    0.06    0.72
   0  11 -38   -1.08    0.90
   0  11  -3    3.83    0.80
   0  12 -34    4.52    1.09
   0  12  -7    0.60    0.97
   0  13 -28   -0.77    1.02
   0  13 -27   22.49    1.43
   0  13 -13   -0.12    1.06
   1  12 -31    2.05    1.03
   1  12 -30    8.82    1.35
   1  12 -12    4.52    1.24
   1  12 -11    8.71    1.02
   2   7 -41    0.91    0.95
   2   9 -38    0.32    1.16
   2   9  -5    0.45    0.66
   2  10 -35    6.15    1.25
   2  11 -31   10.10    1.44
   2  11 -12    0.89    1.14
   3  10 -29    0.12    1.47
   3  10 -15    8.89    1.16
   3  10 -14    1.28    0.88
   4   5 -34    1.35    0.92
   4   6 -34   -1.44    0.88
   4   7 -33   44.18    1.32
   4   8 -30    1.20    1.00
   4   8 -15    0.72    0.71
   4   9 -24   15.21    1.18
   4   9 -23   22.37    1.20
   4   9 -22   15.45    1.13
   4   9 -21    0.45    0.98
  -5  14 -28    0.26    0.48
  -5  14 -27    0.83    0.56
  -4  13 -34   11.80    0.63
  -4  14 -28    2.06    0.59
  -4  14 -27    1.67    0.70
  -3  11 -41   -0.86    0.50
  -3  12 -38   -0.10    0.49
  -3  13 -34   -0.56    0.56
  -3  14 -27    6.49    0.72
  -3  14 -26    1.34    0.89
  -2  12 -37   -0.27    0.73
  -2  13 -32    2.54    0.88
  -2  14 -23    2.59    0.95
  -2  14 -22   -1.30    1.11
  -2  14 -21   -0.69    1.20
  -2  14 -20   31.07    1.49
  -2  14 -19    6.03    1.36
  -2  14 -18    2.46    1.32
  -2  14 -17    8.66    1.35
  -2  14 -16    2.37    1.26
  -1   8 -45    2.35    0.63
  -1  12 -36   -0.51    0.76
  -1  13 -30    0.62    1.03
  -1  13 -10    6.89    1.18
   0  11 -37   16.86    1.11
   0  12 -33    3.82    1.16
   0  13 -26   -1.62    1.08
   0  13 -15   15.41    1.27
   1   7 -43   -0.05    0.87
   1   8 -42    9.70    0.95
   1   9 -40    1.26    1.00
   1  10 -38   79.67    1.46
   1  10  -4   -0.56    0.71
   1  11 -34    6.68    1.20
   1  11  -7    1.19    0.76
   1  12 -29   10.33    1.19
   1  12 -28    0.45    1.37
   1  12 -14   10.06    1.35
   1  12 -13   10.39    1.12
   2   8 -39    0.31    1.05
   2   9 -37   17.23    1.29
   2  10 -34  115.34    1.98
   2  10  -8    2.21    0.71
   2  11 -13   18.12    1.07
   3   6 -38    5.79    1.03
   3   7 -37    8.54    1.18
   3   8 -35    8.22    1.32
   3   9 -32   -0.32    1.28
   3   9 -11    6.17    0.72
   3  10 -28    3.17    1.19
   3  10 -26   12.65    1.48
   3  10 -17    2.76    1.20
   3  10 -16   19.41    1.10
   4   5 -33    0.58    0.96
   4   6 -33    4.52    0.91
   4   8 -28   12.38    1.10
   4   8 -27   10.71    1.27
   4   8 -26    9.07    1.20
   4   8 -18   21.60    1.12
   4   8 -16   27.72    0.96
  -5  14 -26    7.35    0.65
  -4  14 -26    1.51    0.78
  -3  12 -37    0.05    0.66
  -3  13 -33    5.45    0.65
  -3  14 -25    8.01    0.90
  -3  14 -24   52.88    1.32
  -3  14 -23    0.11    1.02
  -3  14 -15   -1.07    1.09
  -3  14 -14    1.99    1.13
  -3  14 -13   19.47    1.17
  -2  10 -42    3.16    0.66
  -2  11 -40    1.87    0.58
  -2  13 -31    2.75    0.95
  -2  13  -8    2.52    0.97
  -1   9 -43   27.48    0.93
  -1  10 -41   14.51    0.92
  -1  12 -35   -0.83    0.85
  -1  12  -5   15.10    0.97
  -1  13 -29    1.26    0.95
  -1  13 -28    9.28    1.22
  -1  13 -12    6.06    1.20
   0   8 -43    5.06    0.89
   0  11  -4    6.24    0.70
   0  13 -22    2.01    1.25
   1  10 -37    0.51    1.12
   1  11 -33    4.59    1.34
   1  12 -27   -0.13    1.19
   1  12 -15    2.71    1.07
   2   7 -40    1.64    1.06
   2  10 -10   11.86    1.00
   2  10  -9    0.22    0.73
   2  11 -27   -0.59    1.37
   2  11 -26   17.29    1.56
   2  11 -15    0.17    0.99
   3   6 -37    0.32    1.03
   3   8 -34   12.16    1.40
   3   8  -9   78.33    1.11
   3   9 -31    4.40    1.40
   3   9 -13    2.16    0.90
   3   9 -12    0.10    0.70
   3  10 -25    6.35    1.22
   3  10 -24   91.81    1.79
   3  10 -23    2.38    1.16
   3  10 -22   -0.48    1.08
   3  10 -21   15.12    1.22
   3  10 -18   44.24    1.34
   4   6 -31   -1.18    1.05
   4   7 -30    1.62    0.96
   4   7 -16    0.02    0.76
   4   7 -15    0.18    0.60
   4   8 -25    0.41    0.94
   4   8 -24   18.13    1.07
   4   8 -23   27.39    1.12
   4   8 -22    3.46    0.91
   4   8 -21   14.67    0.99
   4   8 -19    1.72    0.82
  -6  14 -24   23.73    0.73
  -5  14 -25    0.68    0.68
  -4  11 -40    2.01    0.52
  -4  12 -37    7.43    0.62
  -4  13 -33   -0.56    0.53
  -4  14 -25   17.87    0.95
  -4  14 -24    2.21    0.87
  -3  11 -40    2.66    0.60
  -3  13 -32   -0.93    0.78
  -3  14 -22    2.58    1.08
  -3  14 -21   15.00    1.23
  -3  14 -20    0.13    1.17
  -2   8 -45    1.16    0.59
  -2  11 -39    9.48    0.84
  -2  12 -36    2.54    0.73
  -2  13 -30    0.04    1.02
  -2  13  -9    0.95    0.99
  -1   8 -44    0.62    0.73
  -1  11 -38    4.51    0.77
  -1  12  -6    0.86    0.95
  -1  13 -26    3.20    1.29
  -1  13 -13    3.91    1.29
   0   7 -44    1.00    0.82
   0   9 -41   14.80    1.09
   0  10 -39    5.27    0.86
   0  10  -2   10.49    0.73
   0  11  -5    0.76    0.84
   0  12 -31   -0.18    1.04
   0  12 -30   25.07    1.43
   1   7 -42    0.60    0.94
   1   9 -39   10.81    1.17
   1  10 -36   13.61    1.32
   1  11 -32    1.27    1.35
   1  11  -9   13.92    0.94
   1  12 -22    4.56    1.54
   1  12 -21   12.83    1.54
   1  12 -19    0.70    1.19
   1  12 -18    1.13    1.18
   1  12 -17   28.20    1.36
   2   8 -38    1.53    1.03
   2  11 -25  103.71    1.90
   2  11 -24    1.88    1.21
   2  11 -19    1.64    1.16
   3   7 -35    4.87    1.20
   3   8 -33    3.42    1.32
   3   8 -10    1.69    0.60
   3   9 -29    2.35    1.38
   3   9 -14    4.10    0.80
   4   4 -30   20.83    0.97
   4   5 -31    1.53    0.81
   4   6 -29  135.31    1.77
   4   7 -28    0.29    0.94
   4   7 -27    2.10    1.09
   4   7 -19   -0.12    0.78
   4   7 -18    0.44    0.81
  -6  14 -23    0.10    0.63
  -5  13 -32   -0.20    0.54
  -5  14 -24    2.74    0.73
  -5  14 -23   14.47    0.90
  -4  13 -32    1.33    0.70
  -4  14 -22   56.28    1.32
  -4  14 -15    2.31    1.07
  -3   9 -44    1.82    0.54
  -3  10 -42    7.82    0.64
  -3  12 -36    5.12    0.79
  -3  13 -31    0.64    0.87
  -2  12 -35   12.08    0.88
  -2  13 -29    7.43    1.14
  -2  13 -10    0.17    1.09
  -1   9 -42    1.87    0.86
  -1  11 -37   50.85    1.31
  -1  12  -7    0.82    1.03
  -1  13 -24   -0.50    1.40
  -1  13 -23    0.86    1.38
  -1  13 -16    1.75    1.47
  -1  13 -15    0.19    1.35
  -1  13 -14    0.43    1.05
   0  10 -38    1.67    1.09
   0  11 -35    4.53    1.03
   0  12 -29   -0.26    1.30
   0  12 -12    5.13    1.22
   1   9 -38   -0.82    1.20
   1  10  -6    0.83    0.65
   1  11 -31    0.12    1.19
   1  11 -11   12.98    1.19
   2  10 -31    5.00    1.24
   2  10 -30    0.40    1.44
   2  10 -12    5.56    1.02
   3   6 -36    7.83    0.94
   3   7 -34    2.03    1.20
   3   8 -32   -0.16    1.07
   3   8 -12   23.55    0.91
   3   8 -11    5.45    0.62
   3   9 -27    7.70    1.41
   3   9 -26    3.47    1.33
   3   9 -16   12.85    0.95
   4   4 -29   27.01    0.95
   4   7 -25   -0.75    0.87
   4   7 -24    4.68    0.84
   4   7 -21   14.64    0.88
   4   7 -20    1.02    0.72
  -6  13 -31   -0.94    0.46
  -6  14 -21   21.20    0.87
  -6  14 -20    2.77    0.76
  -6  14 -19    8.51    0.81
  -6  14 -18    2.13    0.87
  -6  14 -17   -0.79    0.88
  -5  12 -36    0.44    0.51
  -5  13 -31   -0.04    0.61
  -5  14 -22    0.07    0.83
  -5  14 -21    0.95    0.91
  -5  14 -20   25.09    1.08
  -5  14 -18    7.76    0.95
  -5  14 -16   -0.23    0.95
  -5  14 -15    5.56    0.99
  -4  10 -42    3.72    0.50
  -4  12 -36   -0.55    0.66
  -4  13 -31   14.69    0.87
  -4  14 -19    2.06    0.94
  -4  14 -18    1.26    0.98
  -4  14 -17    1.06    0.89
  -3  11 -39    8.36    0.67
  -3  12 -35    0.09    0.82
  -3  13 -30    1.35    0.93
  -2  11 -38    9.91    0.94
  -2  12 -34   -0.05    0.96
  -2  13 -28    3.72    0.98
  -2  13 -27    5.04    1.24
  -2  13 -11   62.76    1.58
  -1  11 -36    0.84    1.07
  -1  12 -32    1.96    0.98
  -1  12  -8    0.50    1.06
  -1  13 -22   -0.09    1.23
  -1  13 -21   -0.29    1.18
   0   7 -43    4.99    0.96
   0   9 -40    7.29    1.07
   0  10 -37    3.74    1.15
   0  10  -3    6.89    0.71
   0  11 -34    1.46    1.06
   0  12 -28    0.10    1.17
   0  12 -27   -0.63    1.45
   0  12 -14    1.88    1.35
   0  12 -13   19.27    1.37
   1   7 -41   72.84    1.47
   1   9 -37    0.07    1.17
   1  10 -34    6.07    1.38
   1  11 -12    0.53    0.94
   2   6 -39    0.80    1.04
   2   9 -33    0.82    1.36
   2   9  -9    1.08    0.78
   2  10 -29   11.34    1.30
   2  10 -13    8.16    0.91
   3   5 -35    1.98    0.97
   3   6 -35    1.52    0.89
   3   7 -33   17.88    1.34
   3   8 -31    0.56    1.03
   3   8 -30   74.24    1.75
   3   9 -25    1.89    1.12
   3   9 -24    7.15    1.13
   3   9 -23    0.68    1.04
   3   9 -22    1.06    1.21
   3   9 -21    4.27    1.19
   3   9 -20   -0.25    0.95
   3   9 -18   24.26    1.10
   4   4 -28   -0.16    0.58
   4   4 -27    3.05    0.72
   4   4 -26   96.66    1.27
   4   5 -27   -0.24    0.82
   4   5 -26    0.62    0.78
   4   6 -26    8.13    0.82
   4   6 -25    1.25    0.75
   4   6 -24    3.93    0.90
   4   6 -23   34.05    1.10
   4   6 -22    7.91    0.89
   4   6 -19   45.12    0.97
   4   6 -18    2.62    0.61
  -6  13 -30    1.51    0.57
  -5  11 -39    0.86    0.46
  -5  13 -30    1.80    0.69
  -4  11 -39    2.47    0.55
  -4  12 -35    0.96    0.72
  -4  13 -30    0.05    0.84
  -3   9 -43   -1.24    0.64
  -3  10 -41    0.64    0.70
  -3  11 -38    0.66    0.80
  -3  13 -29    2.59    0.84
  -3  13  -9  120.53    1.73
  -2   7 -45    0.13    0.68
  -2   8 -44    1.78    0.71
  -2  11 -37   -1.44    0.91
  -2  12 -33    0.51    1.01
  -2  13 -26   19.95    1.21
  -2  13 -25    2.72    1.31
  -2  13 -13    0.38    1.27
  -2  13 -12    5.71    1.02
  -1   7 -44    5.16    0.88
  -1   8 -43   12.46    0.96
  -1   9 -41    1.07    0.98
  -1  10 -39    0.13    0.81
  -1  11  -4    1.06    0.82
  -1  12 -31   10.86    1.12
  -1  12 -30    0.30    1.25
  -1  12  -9    0.09    1.09
   0   8 -41    0.64    1.02
   0   9 -39   20.69    1.26
   0  11 -33   18.29    1.26
   0  11 -32   -0.56    1.34
   0  11  -8    0.43    0.95
   0  12 -17    2.61    1.37
   0  12 -16    2.10    1.36
   0  12 -15    3.17    1.15
   1   6 -41   12.42    1.03
   1   7 -40    1.00    1.08
   1   8 -39   -0.04    0.94
   1  11 -27    7.39    1.46
   1  11 -26    2.95    1.45
   1  11 -14   95.29    1.75
   1  11 -13    7.32    1.03
   2   6 -38    1.12    1.01
   2   7 -37    5.95    1.22
   2   8 -35    4.31    1.33
   2   9 -32    0.58    1.34
   2  10 -26    9.25    1.50
   2  10 -25   10.44    1.53
   2  10 -17    3.47    1.23
   2  10 -16  182.63    2.12
   2  10 -15    4.54    0.96
   3   6 -34    1.15    0.92
   3   7 -32    0.77    1.19
   3   8 -29   -0.33    1.03
   3   8 -28   16.72    1.37
   3   8 -15   10.00    0.94
   4   4 -25   -0.02    0.59
   4   5 -24    0.97    0.73
   4   5 -23  322.84    2.16
   4   5 -22   -0.02    0.70
  -6  13 -29    0.38    0.61
  -5  12 -35    2.43    0.58
  -5  13 -29   14.35    0.86
  -4   9 -43    5.05    0.59
  -4  10 -41   -0.08    0.61
  -4  11 -38    0.19    0.69
  -4  13 -29    1.79    0.89
  -3  12 -34    1.03    0.77
  -3  13 -27    4.58    1.16
  -3  13 -10    7.75    1.15
  -2   9 -42    1.15    0.72
  -2  12 -32    7.15    1.16
  -2  13 -24   -0.23    1.14
  -2  13 -22    1.32    1.45
  -2  13 -21    1.27    1.40
  -2  13 -14    3.94    1.15
  -1  10 -38    6.63    1.09
  -1  11 -35   13.64    1.09
   0   7 -42    1.38    1.00
   0  10 -36   70.36    1.54
   0  10  -4    4.15    0.62
   0  11  -9    3.94    1.10
   0  12 -22   -0.78    1.25
   0  12 -21   -0.69    1.27
   0  12 -20    1.45    1.26
   0  12 -19    2.08    1.26
   0  12 -18    8.45    1.27
   1  10  -9    0.71    0.84
   1  11 -25    9.29    1.32
   1  11 -24   -0.97    1.47
   1  11 -20   79.90    1.92
   1  11 -19   -0.28    1.43
   1  11 -17   30.17    1.51
   1  11 -16    5.87    1.10
   2   9 -30    4.69    1.40
   2   9 -11   16.48    0.84
   2  10 -24    5.41    1.24
   2  10 -23   21.25    1.33
   2  10 -22   87.69    1.77
   2  10 -21    3.08    1.16
   2  10 -19    2.55    1.08
   3   5 -34    0.64    0.80
   3   6 -33   11.32    1.01
   3   6 -32   -0.38    1.10
   3   7 -31   -0.22    1.00
   3   7 -30   24.13    1.37
   3   8 -26   -0.62    1.17
   3   8 -25    3.04    1.20
   3   8 -18  233.54    2.13
   3   8 -16   21.86    0.93
  -7  13 -27    0.74    0.55
  -6  12 -34    1.22    0.55
  -6  13 -28    2.36    0.70
  -5  11 -38    2.94    0.53
  -5  12 -34    1.02    0.72
  -5  13 -28    1.91    0.84
  -4  12 -34   26.97    0.91
  -4  13 -28    6.40    0.86
  -4  13 -27    5.07    1.04
  -3   9 -42    5.99    0.79
  -3  10 -40    1.18    0.78
  -3  11 -37    0.46    0.88
  -3  12 -33    0.33    0.85
  -3  13 -26    0.21    0.98
  -3  13 -25    2.75    1.25
  -3  13 -11    1.65    1.13
  -2  10 -39    3.04    0.99
  -2  12  -7    0.85    1.02
  -1   9 -40    0.08    1.02
  -1  10 -37    2.16    1.14
  -1  11 -34    1.34    1.06
  -1  11  -5    0.23    0.81
  -1  12 -28   50.05    1.57
  -1  12 -27   -1.72    1.53
  -1  12 -12    2.71    1.27
   0   8 -40    0.11    1.09
   0   9 -38    1.15    1.00
   0  10 -35   -0.09    1.07
   0  11 -10    0.80    1.06
   1  10 -31    1.23    1.22
   1  10 -30    2.59    1.52
   2   6 -37    0.88    1.07
   2   7 -35    3.70    1.21
   2   8 -33   -0.39    1.25
   2   9 -13   45.71    1.21
   3   5 -33    3.92    0.84
   3   6 -31    5.77    1.09
   3   7 -29    3.25    1.16
   3   7 -28   17.87    1.25
   3   8 -24   24.02    1.13
   3   8 -23   10.18    1.01
   3   8 -22    0.57    0.90
   3   8 -19    5.16    0.87
  -7  13 -26    2.26    0.61
  -6  11 -37    0.24    0.52
  -6  12 -33    4.97    0.66
  -6  13 -27    2.52    0.76
  -5  10 -40    0.26    0.58
  -5  13 -27    1.17    0.90
  -4   7 -45   -0.07    0.60
  -4   8 -44   -0.72    0.55
  -4   9 -42    0.16    0.65
  -4  10 -40    3.66    0.71
  -4  11 -37    5.16    0.88
  -4  12 -33    1.87    0.92
  -4  13 -26    4.02    1.10
  -3  12 -32    2.71    0.96
  -3  13 -24   16.38    1.21
  -3  13 -23   -1.42    1.32
  -2   7 -44    2.66    0.85
  -2   9 -41   18.30    0.96
  -2  10 -38    6.62    1.09
  -2  11 -35    9.07    1.03
  -2  12 -30    0.32    1.07
  -2  12  -8   65.71    1.49
  -1   8 -41    0.59    1.01
  -1   9 -39    2.91    1.13
  -1  11 -33    0.65    1.13
  -1  11 -32    6.87    1.40
  -1  11  -6    3.90    0.97
  -1  12 -26    3.24    1.33
  -1  12 -14    2.57    1.40
   0   6 -42   76.16    1.50
   0   8 -39   33.50    1.41
   0   9 -37   11.74    1.33
   0  10  -6   63.80    1.21
   0  11 -12    8.62    1.25
   1   9  -7    1.70    0.72
   1  10 -29    7.06    1.31
   1  10 -12   10.58    1.13
   1  10 -11   23.87    1.01
   2   5 -37   73.30    1.49
   2   6 -36   13.71    1.27
   2   8 -32    7.36    1.14
   2   9 -28  102.34    1.87
   2   9 -26    4.14    1.44
   2   9 -15    5.18    1.01
   3   5 -32    2.58    0.84
   3   5 -31    7.23    1.02
   3   6 -30   28.85    1.26
   3   7 -27   66.89    1.44
   3   7 -26   -0.63    1.08
   3   7 -16   27.24    0.98
  -8  13 -23    7.56    0.61
  -7  12 -32    4.97    0.57
  -7  13 -25   43.42    0.97
  -6  13 -26    0.24    0.84
  -5   9 -42    0.96    0.54
  -5  11 -37    1.10    0.62
  -5  12 -33    1.80    0.68
  -5  13 -26   31.52    1.16
  -4  12 -32    1.14    1.04
  -4  13 -25   60.28    1.38
  -3   8 -43   -0.79    0.82
  -3   9 -41   -0.59    0.89
  -3  10 -39    6.25    0.84
  -3  12 -31    1.11    0.99
  -2   8 -42    5.79    0.96
  -2   9 -40   -0.05    1.02
  -2  11 -34    1.53    1.22
  -2  12 -29    0.85    1.16
  -2  12 -28    2.81    1.47
  -2  12  -9    0.84    1.12
  -1   6 -43   -0.92    1.05
  -1   7 -42   -0.50    1.01
  -1  10 -36   -1.04    1.06
  -1  10  -3    7.44    0.74
  -1  12 -21    3.23    1.61
  -1  12 -20    3.34    1.63
  -1  12 -19   11.41    1.65
  -1  12 -16    6.20    1.22
  -1  12 -15    3.09    1.26
   0   7 -40   24.18    1.30
   0   9 -36    0.58    1.39
   0  10  -7    3.97    0.87
   0  11 -27   80.56    1.83
   0  11 -13    9.36    1.26
   1   6 -39    0.74    1.13
   1   9 -33    0.37    1.17
   1   9 -32    7.93    1.44
   1  10 -26   38.54    1.73
   1  10 -13    6.39    0.95
   2   5 -36    3.73    1.08
   2   6 -35    0.48    1.17
   2   7 -33    3.29    1.26
   2   8 -31  125.69    1.93
   2   8 -30   -0.01    1.34
   2   8 -11    0.09    0.75
   2   9 -25  150.90    2.10
   2   9 -24   45.14    1.46
   2   9 -22   -1.13    1.29
   2   9 -21    4.60    1.25
   2   9 -19  304.99    2.64
   2   9 -18    0.25    1.14
   2   9 -17   -0.01    0.88
   2   9 -16    0.95    0.86
   3   4 -31   11.13    0.91
   3   6 -29   13.37    0.98
   3   7 -25    4.19    0.89
   3   7 -22    1.16    0.95
   3   7 -21  441.04    2.77
   3   7 -20    5.52    0.91
   3   7 -19   -0.55    0.82
   3   7 -18   64.33    1.17
   3   7 -17    3.73    0.68
  -8  13 -22   -0.22    0.63
  -7  12 -31   17.55    0.73
  -6  10 -39    1.71    0.55
  -6  12 -32    0.71    0.72
  -6  13 -25   -0.70    0.88
  -5  10 -39   -0.23    0.68
  -5  11 -36    0.59    0.79
  -5  12 -32    4.83    0.93
  -5  13 -24    2.66    1.12
  -4   8 -43    0.21    0.70
  -4  11 -36    0.17    0.80
  -4  12 -31    0.77    1.08
  -4  13 -23    0.11    1.02
  -4  13 -22    0.11    1.31
  -3   7 -44    0.52    0.80
  -3  10 -38    0.66    0.98
  -3  12 -30   25.52    1.24
  -2   7 -43    1.24    0.93
  -2  11 -33   -0.60    1.27
  -2  12 -27    4.28    1.29
  -2  12 -26   90.14    2.03
  -1   9 -38    0.20    1.19
  -1  10 -35   -0.18    1.15
  -1  11  -8    1.82    1.03
   0   6 -41    0.63    1.05
   0   8 -38    0.44    1.29
   0  10  -8    0.44    0.91
   0  11 -25    5.16    1.31
   0  11 -24    8.83    1.40
   0  11 -23   22.53    1.76
   0  11 -22    2.79    1.62
   0  11 -21    9.14    1.57
   0  11 -16    2.03    1.36
   1   5 -39    4.25    1.08
   1   7 -37    0.70    1.04
   1   8 -35   14.65    1.23
   1   9 -31   -0.62    1.46
   1  10 -25    3.96    1.26
   1  10 -22    2.02    1.44
   1  10 -18    8.58    1.31
   2   6 -34   34.59    1.42
   2   8 -29    4.28    1.13
   2   8 -28   19.49    1.41
   3   4 -30  139.32    1.60
   3   5 -29    1.43    0.92
   3   6 -27   80.53    1.41
   3   6 -26   -1.15    0.95
  -8  12 -29    4.15    0.58
  -8  13 -20    2.24    0.74
  -8  13 -19    0.50    0.85
  -7  11 -35    0.01    0.56
  -7  13 -23    5.90    0.87
  -7  13 -22   33.75    1.10
  -6   9 -41    0.29    0.52
  -6  12 -31    0.44    0.82
  -6  13 -24    0.96    0.85
  -6  13 -23   -0.17    1.00
  -5   8 -43    0.49    0.58
  -5   9 -41   11.30    0.76
  -5  12 -31    2.14    0.96
  -5  13 -23   49.43    1.33
  -5  13 -22   -0.90    1.24
  -5  13 -13    1.68    1.17
  -5  13 -12    2.23    1.15
  -4   9 -41    0.73    0.80
  -4  11 -35    0.97    1.02
  -4  12 -30   -0.08    1.20
  -4  13 -18    4.35    1.48
  -4  13 -16   16.67    1.38
  -4  13 -15    0.38    1.25
  -3   8 -42   24.82    1.08
  -3   9 -40    1.38    0.96
  -3  11 -34   10.36    1.24
  -3  12 -29   -0.89    1.10
  -3  12 -28   11.06    1.46
  -3  12  -8    1.34    1.11
  -2   8 -41   -0.19    1.07
  -2   9 -39    0.88    1.12
  -2  11  -5   10.18    0.94
  -2  12 -25    0.04    1.26
  -2  12 -13   -0.24    1.36
  -1   7 -41    0.66    1.17
  -1   9 -37    3.48    1.35
  -1  10 -34    5.95    1.25
  -1  10  -4  263.74    1.98
  -1  11  -9    0.86    0.92
   0  11 -20    3.36    1.28
   0  11 -19    8.75    1.28
   1   8 -34    2.20    1.11
   1   9 -30   19.62    1.40
   1   9 -29  262.67    2.83
   1  10 -21    1.02    1.16
   1  10 -19    5.01    1.14
   2   6 -33    3.19    1.15
   2   8 -26    1.83    1.22
   2   8 -14   -0.73    0.81
   2   8 -13   39.82    0.97
   3   4 -29    0.03    0.68
   3   4 -28    2.22    0.81
   3   5 -27  113.27    1.57
   3   6 -24  235.32    2.04
   3   6 -22    2.50    0.85
  -8  13 -18    2.90    0.82
  -8  13 -17    8.09    0.87
  -7  12 -30    0.16    0.59
  -7  13 -21    4.18    0.97
  -7  13 -20    4.94    1.02
  -6  10 -38    1.44    0.67
  -6  11 -35    0.37    0.73
  -6  12 -30   39.66    1.13
  -6  13 -22    3.69    0.95
  -6  13 -21   14.41    1.21
  -6  13 -20    1.80    1.09
  -6  13 -13   -1.54    1.06
  -5   7 -44    7.39    0.65
  -5  10 -38   11.64    0.90
  -5  11 -35   15.76    0.88
  -5  12 -30    1.08    1.03
  -5  13 -21    1.37    1.05
  -5  13 -20   -0.55    1.28
  -5  13 -19    5.08    1.36
  -5  13 -16    1.76    1.38
  -5  13 -15   -1.04    1.32
  -5  13 -14    1.38    1.27
  -4  10 -38   -0.36    0.80
  -4  11 -34    6.02    1.14
  -4  12 -29    0.25    1.24
  -3   7 -43    1.48    0.92
  -3  10 -37   -0.10    0.93
  -3  11 -33   26.48    1.43
  -3  12 -27   19.56    1.54
  -3  12  -9   75.68    1.65
  -2   7 -42    0.70    1.04
  -2  10 -35   14.19    1.41
  -2  11 -31    0.15    1.19
  -2  12 -21    0.18    1.63
  -2  12 -20    2.45    1.64
  -2  12 -18    0.37    1.65
  -2  12 -15    0.26    1.46
  -2  12 -14   23.22    1.35
  -1   6 -42    1.02    0.99
  -1   8 -39    1.91    1.09
  -1   9 -36   -0.23    1.35
  -1  10 -33    2.01    1.29
  -1  10  -5   -0.03    0.77
  -1  11 -11   -0.88    1.15
  -1  11 -10    5.26    0.97
   0  10 -29    0.91    1.30
   0  10 -28    0.09    1.51
   1   5 -38    8.81    1.15
   1   6 -37    3.82    1.22
   1   8 -32  540.05    3.65
   1   9 -28   12.03    1.57
   1   9 -12    4.27    0.90
   1   9 -11   28.59    0.96
   2   5 -34    1.25    1.04
   2   7 -30   -1.41    1.04
   2   8 -23    3.69    1.21
   2   8 -18    1.84    0.96
   2   8 -17   -1.01    0.96
   2   8 -16  106.83    1.49
   2   8 -15    7.57    0.78
   3   4 -27   13.15    0.85
   3   4 -26    0.50    0.72
   3   5 -25    6.39    0.86
   3   5 -24    3.37    0.80
  -7  11 -34    7.41    0.64
  -4   9 -40   26.65    0.99
  -4  12 -28   59.06    1.55
  -3  12 -26    0.32    1.24
  -2   9 -38    4.93    1.07
  -2  11 -30    0.10    1.25
  -1  11 -26    0.85    1.38
  -1  11 -12    2.68    1.04
   0  10 -11   17.30    0.99
   1   9 -27   -1.94    1.20
   2   7 -29    3.95    1.04
   2   8 -21    2.78    0.93
   2   8 -20   14.06    1.01
   3   5 -23    1.91    0.63
 -13  -3 -31    9.23    0.58
 -13  -1 -29   -0.07    0.61
 -13   1 -25    6.51    0.83
 -12  -2 -33   -0.14    0.70
 -12   0 -30    2.71    0.90
 -12   1 -28    2.11    1.00
 -12   2 -25    1.39    0.99
 -11   0 -32   88.45    1.45
 -11   1 -30   -0.61    0.94
 -11   3 -24    1.59    1.11
 -10  -5 -37    1.39    0.67
 -10  -4 -37    7.28    0.77
 -10  -3 -37   31.70    1.06
 -10  -2 -36    1.43    0.90
 -10  -1 -35    0.83    0.98
 -10   0 -34   20.78    1.32
  -9  -6 -38   -0.08    0.67
  -9   4 -23    9.47    1.23
  -8  -8 -37   -0.06    0.54
  -8  -7 -38    1.28    0.69
  -8  -5 -39   -1.04    0.89
  -8  -4 -39    3.31    1.00
  -8  -3 -39    1.73    1.11
  -8  -2 -38    3.87    1.12
  -8  -1 -37    3.67    1.15
  -8   0 -36    2.73    1.48
  -8   4 -24   20.38    1.31
  -7   2 -32    0.99    1.21
  -7   3 -29    4.75    1.31
  -7   4 -25   22.15    1.33
  -6   2 -32    2.83    1.22
  -6   3 -29    4.60    1.29
  -6   4 -25   14.93    1.21
  -6   5 -17    0.21    0.72
  -5   0 -36  142.76    2.13
  -5   2 -32    4.17    1.44
  -5   4 -24   -0.06    0.99
  -4  -2 -38    1.06    1.20
  -4  -1 -37    6.25    1.49
  -4   2 -31  111.15    1.93
  -3  -2 -37    0.85    1.11
  -3   3 -25    0.34    0.69
  -2  -5 -37    2.79    1.13
  -2  -4 -37    3.33    1.30
  -2  -2 -36    0.34    1.22
  -1  -4 -35    8.37    1.10
  -1  -2 -34  264.82    2.38
   0  -3 -32   -0.25    0.88
   0  -2 -31   16.84    0.98
   0  -1 -29    1.91    0.66
 -13   0 -28    3.35    0.76
 -13   1 -26    0.03    0.80
 -12  -4 -34    0.43    0.48
 -12  -3 -34    0.55    0.59
 -12   2 -26    0.14    0.94
 -11  -5 -36   -0.18    0.53
 -11  -4 -36    1.48    0.65
 -11  -2 -35    2.18    0.73
 -11  -1 -34    0.38    0.81
 -11   1 -31    1.38    1.08
 -11   2 -28    4.22    0.99
 -11   3 -25    2.44    1.07
 -10  -6 -37    1.25    0.56
 -10   2 -30    1.88    1.27
  -9  -2 -38   -0.05    1.00
  -9  -1 -37   -1.05    1.23
  -9   1 -34    1.54    1.32
  -9   3 -28    0.58    1.15
  -9   4 -24   24.33    1.36
  -8  -6 -39    0.46    0.76
  -8   3 -29   40.22    1.44
  -7  -7 -39    0.36    0.72
  -7  -5 -40    6.22    1.07
  -7  -4 -40   18.13    1.25
  -7  -2 -39    4.49    1.15
  -7  -1 -38   15.48    1.31
  -7   2 -33    0.30    1.49
  -7   3 -30   -0.73    1.37
  -7   4 -26    4.69    1.22
  -7   5 -19   53.00    1.24
  -6  -5 -40    3.07    1.08
  -6  -3 -40    1.79    1.35
  -6   1 -35    7.40    1.31
  -6   2 -33   -0.68    1.55
  -6   3 -30    4.38    1.40
  -6   5 -18    0.57    0.79
  -5  -4 -40    0.10    1.35
  -5  -1 -38    2.54    1.28
  -5   1 -35  161.62    2.39
  -5   3 -29  166.74    2.03
  -4  -6 -39   -0.12    1.08
  -4   1 -34    9.07    1.24
  -4   2 -32   16.17    1.40
  -4   4 -23   -0.25    0.88
  -3   2 -30  108.41    1.65
  -3   3 -26   -0.33    0.73
  -2  -3 -37    6.91    1.31
  -2  -1 -35  263.09    2.44
  -2   2 -28   13.87    1.03
  -1  -3 -35   -0.43    1.07
  -1  -1 -33   22.48    1.20
  -1   1 -28  114.17    1.43
 -12   1 -29    2.96    0.90
 -11  -3 -36    1.38    0.63
 -11   2 -29    9.63    1.19
 -10  -5 -38    2.57    0.60
 -10  -4 -38    0.83    0.74
 -10  -1 -36   11.80    0.96
 -10   1 -33   -0.18    1.17
  -9  -5 -39   13.83    0.80
  -9  -4 -39    1.66    0.83
  -9   0 -36   56.03    1.57
  -9   2 -32    0.08    1.28
  -9   4 -25    0.63    1.21
  -8  -5 -40    0.72    0.83
  -8  -4 -40    1.61    0.97
  -8  -2 -39    4.15    1.06
  -8  -1 -38   10.27    1.15
  -8   1 -35   13.25    1.32
  -8   3 -30    1.38    1.47
  -8   4 -26   58.46    1.65
  -7  -6 -40   52.67    1.16
  -7   5 -20    2.93    0.95
  -6  -6 -40    0.50    0.90
  -6  -2 -40    6.36    1.35
  -6  -1 -39    3.71    1.52
  -6   4 -26    3.62    1.01
  -6   5 -19    0.14    0.83
  -5  -6 -40    0.21    0.99
  -5   2 -33    6.48    1.24
  -5   3 -30    5.61    1.30
  -5   4 -26    9.33    1.16
  -5   5 -18    0.85    0.70
  -4  -5 -40   22.08    1.34
  -4  -1 -38    3.07    1.25
  -3  -3 -39  181.00    2.37
  -3  -2 -38   -0.06    1.10
  -3  -1 -37    4.38    1.19
  -3   0 -36   98.99    1.95
  -3   3 -27  147.39    1.71
  -2  -5 -38   57.64    1.45
  -2  -4 -38  198.79    2.30
  -2  -2 -37   11.77    1.43
  -2  -1 -36    2.43    1.30
  -2   1 -32    7.59    1.17
  -2   2 -29    0.49    0.98
  -2   3 -24   -0.04    0.74
  -1  -3 -36    2.08    1.13
  -1  -2 -35   26.07    1.31
  -1  -1 -34   -0.55    1.08
  -1   0 -32   21.55    1.16
  -1   1 -29    1.70    0.72
   0  -2 -32    2.38    0.76
   0  -1 -31    1.72    0.87
 -13   1 -27    0.51    0.69
 -12  -2 -34   -0.01    0.60
 -12  -1 -33   22.11    0.86
 -12   2 -27    1.96    0.96
 -11  -4 -37    0.17    0.57
 -11  -2 -36    0.74    0.74
 -11  -1 -35   24.06    1.00
 -11   1 -32    0.58    1.04
 -10   2 -31    0.38    1.04
  -9  -6 -39    1.71    0.56
  -9   4 -26    7.72    1.20
  -8  -7 -39    2.48    0.58
  -8  -3 -40    1.86    0.90
  -8   1 -36    2.05    1.35
  -8   4 -27    6.87    1.31
  -8   5 -21    9.89    1.03
  -7  -4 -41    5.88    1.03
  -7  -2 -40    7.97    1.10
  -7  -1 -39    0.21    1.12
  -7   2 -34   23.89    1.40
  -7   3 -31   25.22    1.34
  -7   4 -27    1.44    1.06
  -6  -4 -41    0.98    1.13
  -6  -3 -41    1.36    1.22
  -6   3 -31    1.95    1.17
  -6   4 -27    1.91    1.04
  -6   5 -21   25.17    1.13
  -6   5 -20    8.41    0.80
  -5  -5 -41   25.69    1.23
  -5  -4 -41   18.22    1.39
  -5   0 -38    1.38    1.51
  -5   1 -36    8.94    1.29
  -5   2 -34   10.03    1.61
  -5   3 -31    2.45    1.36
  -5   5 -19   -0.52    0.78
  -4  -6 -40   19.64    1.13
  -4  -1 -39    0.06    1.43
  -4   3 -30    1.67    1.23
  -4   4 -25    9.25    1.07
  -3  -6 -39    3.39    1.07
  -3  -2 -39    3.54    1.32
  -3  -1 -38    0.90    1.42
  -3   2 -32    2.20    1.25
  -3   4 -22    4.34    0.77
  -2  -3 -38    5.69    1.31
  -2   2 -30    1.98    1.01
  -1   1 -30    4.09    0.92
   0  -3 -34    6.77    0.98
   0  -2 -33   11.30    1.04
 -13  -1 -31    1.32    0.54
 -12   0 -32   -0.28    0.75
 -12   1 -30    3.19    0.88
 -11  -3 -37    0.48    0.62
 -11   0 -34   -0.43    0.78
 -11   3 -27   -0.58    1.02
 -10  -1 -37   25.71    1.00
 -10   0 -36    1.01    1.00
 -10   2 -32    0.10    1.22
  -9  -4 -40    5.50    0.75
  -9  -2 -39    7.52    0.88
  -9   2 -33   11.30    1.16
  -8  -6 -40    0.34    0.65
  -8  -2 -40   -1.19    1.04
  -8   0 -38   24.04    1.43
  -8   2 -34    2.31    1.23
  -7  -7 -40    4.92    0.71
  -7  -5 -41    3.58    0.93
  -7  -3 -41    8.55    1.14
  -7   1 -37   13.52    1.59
  -7   3 -32   -0.81    1.41
  -7   4 -28   99.65    1.93
  -7   5 -22    5.15    1.11
  -6  -7 -40    0.51    0.71
  -6  -6 -41    0.00    0.82
  -6  -2 -41    7.31    1.29
  -6   2 -35    9.40    1.58
  -6   3 -32    0.45    1.43
  -6   4 -28    5.21    1.38
  -6   5 -22    1.07    0.98
  -5  -6 -41    1.00    0.96
  -5  -3 -41   60.40    1.55
  -5   4 -27    1.73    1.00
  -5   5 -21    3.42    0.88
  -4  -5 -41    0.49    1.08
  -4  -4 -41    1.63    1.30
  -4   1 -36   -0.47    1.18
  -4   3 -31   48.88    1.56
  -4   4 -26   -0.43    1.06
  -3  -5 -40    1.30    1.15
  -3   1 -35    4.96    1.17
  -3   3 -29    3.37    1.12
  -2  -4 -39    1.72    1.25
  -2  -2 -38    4.73    1.42
  -2  -1 -37    3.50    1.31
  -1  -4 -37   18.61    1.24
  -1  -3 -37   19.54    1.31
  -1  -2 -36   15.98    1.09
  -1  -1 -35    1.25    1.17
  -1   1 -31  203.47    2.05
  -1   2 -27   -0.15    0.68
 -13   0 -30    0.58    0.57
 -13   1 -28    0.44    0.61
 -12  -2 -35   -0.37    0.53
 -12  -1 -34    9.12    0.71
 -12   1 -31   16.29    0.91
 -12   2 -28    0.75    0.85
 -11  -2 -37   -0.44    0.65
 -11  -1 -36    7.79    0.80
 -10  -4 -39    0.66    0.60
 -10  -3 -39   -0.88    0.68
  -9  -5 -40    0.22    0.60
  -9  -3 -40    0.98    0.70
  -9  -1 -39   10.95    1.06
  -9   1 -36    6.08    1.19
  -8  -5 -41   24.48    0.90
  -8  -4 -41    0.38    0.71
  -8  -3 -41   12.26    1.01
  -8   1 -37    2.58    1.37
  -8   2 -35    6.28    1.38
  -8   4 -28    5.03    1.13
  -8   5 -23   44.57    1.37
  -7  -2 -41    3.03    1.13
  -7  -1 -40   12.68    1.19
  -7   4 -29    2.24    1.36
  -7   5 -23   -0.68    1.09
  -6  -4 -42   20.24    1.21
  -6   4 -29    3.52    1.37
  -5  -2 -41  133.27    1.93
  -5   2 -35    0.03    1.24
  -5   3 -32    1.75    1.22
  -5   4 -28    1.93    1.03
  -4   4 -27    1.21    1.14
  -3  -2 -40    0.79    1.33
  -3  -1 -39    2.56    1.46
  -3   2 -33   11.12    1.15
  -3   3 -30  109.85    1.80
  -3   4 -25    2.28    0.94
  -3   4 -24   79.53    1.28
  -2  -3 -39    9.06    1.16
  -2   0 -36   15.57    1.20
  -2   1 -34    1.29    1.03
  -2   2 -31   -0.02    0.90
  -2   3 -27   51.89    1.16
  -1   1 -32    9.49    1.09
  -1   2 -28  194.49    1.83
   0  -2 -34    4.16    1.00
   0  -1 -33  579.18    3.18
   1  -2 -30   -0.06    0.60
   1  -1 -29   77.33    1.20
 -11   3 -28    0.16    0.97
 -10  -2 -39    3.68    0.77
 -10   1 -35   -0.75    0.85
 -10   2 -33   -0.06    1.07
 -10   3 -30    0.02    1.12
 -10   4 -26    0.84    1.08
  -9   0 -38    4.15    0.98
  -9   3 -32    0.63    1.26
  -8  -2 -41    7.99    1.07
  -8   4 -29   30.07    1.47
  -7  -5 -42   -0.24    0.76
  -7  -4 -42   -0.32    0.87
  -7   1 -38   16.21    1.49
  -7   3 -33   -1.18    1.16
  -7   4 -30    1.45    1.36
  -7   5 -24    1.35    1.07
  -6  -5 -42    1.04    0.87
  -6  -1 -41    8.31    1.42
  -6   2 -36   25.31    1.44
  -6   4 -30   81.85    1.84
  -6   5 -24   37.24    1.35
  -5  -5 -42   -0.26    1.00
  -5  -3 -42    5.07    1.10
  -5  -1 -41    9.70    1.51
  -5   3 -33    1.07    1.39
  -5   4 -29   45.40    1.37
  -5   5 -23    8.27    1.06
  -4  -6 -41    3.29    0.94
  -4  -4 -42   -0.43    1.14
  -4   4 -28   77.42    1.62
  -4   5 -21    3.34    0.85
  -3  -5 -41    3.57    1.10
  -3  -4 -41    2.49    1.26
  -3   2 -34    4.15    1.31
  -3   3 -31    1.19    1.22
  -3   4 -26    1.16    0.97
  -2  -2 -39    0.68    1.15
  -2  -1 -38    0.64    1.08
  -2   2 -32   10.16    1.04
  -1  -4 -38    1.30    1.11
  -1  -3 -38   -1.77    1.23
  -1  -1 -36    1.38    1.00
  -1   2 -29   15.57    0.91
   0   1 -29    4.78    0.88
   1  -2 -31   -0.71    0.79
 -13   1 -29    0.20    0.54
 -12  -1 -35   -0.06    0.54
 -11  -3 -38    8.75    0.56
 -11  -1 -37    0.83    0.65
 -11   1 -34    0.95    0.87
 -11   2 -32   20.36    1.05
 -11   3 -29   18.18    1.05
 -10   3 -31   20.17    1.21
 -10   4 -27    0.17    1.06
  -9  -4 -41   -0.64    0.60
  -9  -3 -41    0.25    0.71
  -9   1 -37   -0.18    1.07
  -8  -6 -41    4.65    0.59
  -8  -4 -42    1.88    0.71
  -8  -3 -42   -0.98    0.80
  -8   1 -38    9.38    1.29
  -8   2 -36   -1.07    1.28
  -8   5 -25   -0.84    1.10
  -7  -2 -42   -0.74    1.05
  -7  -1 -41   28.39    1.27
  -7   0 -40   11.27    1.16
  -7   5 -25   82.64    1.63
  -6  -6 -42   34.95    0.95
  -6  -2 -42   42.40    1.30
  -6   1 -39    5.43    1.41
  -6   3 -34    1.31    1.20
  -6   5 -25    2.98    1.13
  -5  -6 -42    0.87    0.79
  -5  -2 -42   24.84    1.26
  -5   3 -34   -0.15    1.47
  -5   4 -30    0.65    1.26
  -5   5 -24    0.93    1.06
  -4  -5 -42   -0.01    1.02
  -4  -3 -42    1.34    1.08
  -4   1 -38    1.93    1.28
  -4   3 -33   -0.47    1.34
  -4   4 -29    3.56    1.21
  -4   5 -22   85.68    1.42
  -3  -1 -40   -0.74    1.17
  -3   1 -37    5.43    1.23
  -3   2 -35   16.52    1.49
  -3   4 -27    0.76    1.01
  -2  -3 -40    1.95    1.11
  -2   2 -33    7.13    1.28
  -1  -2 -38    1.97    1.24
  -1   1 -33   23.52    1.11
  -1   2 -30   -0.18    0.81
  -1   3 -25  235.64    1.88
   0  -3 -36   10.09    1.09
   0  -1 -34    9.40    0.92
   0   1 -30   -0.37    0.88
   1  -2 -32  111.77    1.51
   1  -1 -30    9.65    0.72
 -12   0 -34    0.24    0.59
 -11  -2 -38   16.21    0.67
 -11   0 -36    7.89    0.79
 -10  -4 -40    2.61    0.49
 -10  -1 -39    3.14    0.80
 -10   0 -38   11.36    0.93
 -10   1 -36   11.65    0.91
 -10   2 -34   20.49    1.03
  -9  -2 -41   -0.40    0.78
  -9  -1 -40    2.01    0.80
  -9   3 -33   11.91    1.32
  -8  -1 -41   13.16    0.95
  -8   0 -40   14.97    1.23
  -8   3 -34    4.37    1.34
  -8   5 -26   24.30    1.31
  -7  -6 -42   -0.07    0.58
  -7  -4 -43   11.81    0.88
  -7  -3 -43    4.31    0.93
  -7   1 -39    1.32    1.16
  -7   4 -31    9.82    1.27
  -6  -4 -43    1.35    0.98
  -6  -1 -42   81.85    1.75
  -6   4 -31    5.54    1.14
  -6   5 -26    3.33    1.18
  -5  -4 -43    1.93    1.05
  -5  -3 -43    0.89    1.16
  -5  -1 -42    1.59    1.37
  -5   2 -37    1.74    1.25
  -4  -2 -42    0.27    1.11
  -4   1 -39   -1.41    1.45
  -4   4 -30   20.16    1.38
  -4   5 -24    2.04    0.95
  -3  -4 -42    7.00    1.23
  -3  -3 -42    9.83    1.41
  -3   1 -38    0.22    1.42
  -3   4 -28   -0.54    1.08
  -2  -2 -40   14.00    1.20
  -2   1 -36    4.03    1.14
  -2   2 -34    2.63    1.31
  -2   4 -25    1.09    0.82
  -1  -4 -39    6.06    1.16
  -1   1 -34    1.01    1.10
  -1   2 -31    2.33    1.03
  -1   3 -26   10.40    0.78
   0  -3 -37    9.89    1.08
   0  -2 -36   58.19    1.51
   0   1 -31    1.89    0.92
   1  -1 -31    1.76    0.81
 -11   1 -35   22.99    0.95
 -11   2 -33    0.85    0.87
 -11   3 -30    8.32    0.99
 -10  -2 -40   29.73    0.83
 -10   2 -35   -0.21    0.95
 -10   3 -32    4.15    1.08
  -9   1 -38   -0.08    0.98
  -9   2 -36   45.10    1.26
  -8   1 -39    1.11    1.15
  -8   2 -37    1.49    1.08
  -7  -2 -43    4.34    0.97
  -7  -1 -42    4.50    1.01
  -7   2 -38    2.03    1.34
  -7   4 -32    2.46    1.46
  -7   5 -27    2.03    1.27
  -6   1 -40    1.10    1.40
  -6   4 -32    1.50    1.38
  -6   5 -27   38.44    1.28
  -5  -2 -43    2.07    1.02
  -5   5 -27   20.92    1.30
  -5   5 -26   21.27    1.10
  -4  -5 -43   18.66    1.03
  -4  -3 -43    4.23    1.24
  -4  -1 -42   -0.62    1.37
  -4   4 -31    2.30    1.31
  -3  -5 -42    2.90    1.00
  -3   0 -40   -0.38    1.47
  -3   2 -36    4.44    1.19
  -3   3 -33    5.56    1.13
  -2  -5 -41   44.96    1.30
  -2  -2 -41    3.88    1.33
  -2  -1 -40    2.72    1.37
  -2   3 -31   12.50    1.05
  -2   4 -26   52.43    1.26
  -1  -2 -39    2.00    1.21
  -1  -1 -38    8.78    1.12
  -1   2 -32    6.44    1.15
   0  -2 -37   14.73    1.20
   0  -1 -36   16.92    1.20
   0   0 -34   25.27    1.27
   0   1 -32    1.18    0.94
   0   2 -28    7.77    0.89
   1  -3 -34    3.97    0.90
   1  -2 -33   18.74    0.89
   1  -1 -32    9.56    0.95
   1   0 -30   -0.65    0.78
 -12   1 -33   22.07    0.78
 -12   2 -31    0.48    0.65
 -11  -1 -38    1.44    0.56
 -10   1 -37   29.14    0.96
 -10   4 -29   -1.58    1.05
  -9  -4 -42    3.02    0.54
  -9  -1 -41    1.14    0.80
  -9   0 -40   16.66    1.01
  -9   3 -34    2.38    1.02
  -8  -3 -43   -0.66    0.68
  -8   3 -35    6.01    1.10
  -8   5 -27    0.74    0.95
  -7   1 -40   15.81    1.20
  -7   3 -36   -1.78    1.39
  -7   5 -28   45.47    1.54
  -6  -4 -44    1.39    0.85
  -6  -1 -43    0.85    1.20
  -6   4 -33    2.67    1.40
  -6   6 -20    0.26    0.86
  -5  -6 -43    0.94    0.69
  -5  -4 -44   20.80    1.11
  -5  -3 -44    0.20    1.11
  -5   3 -36    0.36    1.54
  -4   2 -38   -0.02    1.45
  -3  -4 -43   -0.03    1.12
  -3  -3 -43    0.53    1.27
  -3   2 -37    1.87    1.45
  -3   4 -30  116.30    1.86
  -3   5 -23    0.62    0.86
  -2  -4 -42    1.49    1.11
  -2   3 -32    7.54    1.22
  -2   4 -27    3.93    0.96
  -1  -3 -40   -0.59    1.18
  -1   2 -33   13.65    1.25
  -1   3 -29   15.14    1.10
   0  -3 -38    1.74    1.11
   0   2 -29    0.24    0.88
   1  -1 -33   11.60    1.02
 -11   1 -36    6.61    0.72
 -11   2 -34   -0.19    0.77
 -10   2 -36    1.42    0.90
 -10   3 -33    0.37    0.86
 -10   4 -30   -0.45    0.95
  -9  -2 -42   11.93    0.68
  -9   1 -39    8.56    1.00
  -9   2 -37    1.15    0.87
  -8  -2 -43    0.66    0.77
  -8   1 -40   -0.24    0.92
  -8   2 -38    2.65    1.00
  -8   3 -36    0.96    1.24
  -8   5 -28    4.44    1.19
  -7  -4 -44    3.35    0.73
  -7  -3 -44    0.25    0.77
  -7  -1 -43   29.02    1.10
  -7   0 -42   13.18    1.07
  -7   2 -39    5.07    1.36
  -7   5 -29    0.96    1.28
  -6  -5 -44    0.99    0.70
  -6  -2 -44    9.25    1.06
  -6   1 -41    8.61    1.34
  -5   1 -41    7.65    1.41
  -5   4 -33    3.38    1.19
  -5   6 -19    1.97    0.83
  -4  -1 -43   20.19    1.42
  -4   0 -42    1.88    1.42
  -3  -5 -43    0.17    0.95
  -3   1 -40   -1.66    1.43
  -3   3 -35    0.42    1.43
  -3   5 -24    0.97    0.76
  -2  -1 -41    4.17    1.19
  -2   0 -40    0.52    1.47
  -2   2 -36    3.08    1.15
  -2   3 -33   16.18    1.39
  -2   4 -28   -1.05    0.82
  -1   0 -38   -1.35    1.03
  -1   1 -36    1.06    1.02
  -1   2 -34  254.95    2.48
   0  -2 -38    0.65    1.16
   0  -1 -37    0.54    1.12
   1  -3 -35    4.53    0.93
   1   1 -29   75.06    1.27
   1   1 -28    0.73    0.62
 -12   1 -34    8.34    0.59
 -11   0 -38   10.76    0.64
 -10  -2 -41    1.74    0.50
 -10   1 -38   -0.28    0.68
 -10   3 -34    0.98    0.93
  -9  -1 -42   -0.52    0.71
  -9   2 -38    0.25    0.94
  -9   4 -32    3.19    1.17
  -9   5 -28    0.70    1.03
  -8  -1 -43    3.11    0.84
  -8   2 -39    2.02    1.08
  -7  -5 -44    0.40    0.54
  -7  -2 -44    0.12    0.74
  -7   3 -37   25.19    1.27
  -7   5 -30    0.38    1.30
  -7   6 -23   10.31    1.12
  -6  -1 -44    3.63    1.04
  -6   2 -40    6.56    1.40
  -6   6 -23    1.63    1.09
  -5  -1 -44   14.95    1.27
  -5   3 -37    0.69    1.23
  -5   4 -34    3.78    1.22
  -5   6 -22    2.37    0.95
  -5   6 -21    0.67    0.91
  -5   6 -20   60.58    1.16
  -4  -5 -44    2.15    0.88
  -4  -2 -44    3.00    0.97
  -4   2 -39    9.69    1.27
  -4   3 -37    9.57    1.59
  -4   4 -33    1.61    1.15
  -4   5 -28   16.38    1.12
  -3  -3 -44    3.71    1.17
  -3  -1 -43    2.34    1.39
  -3   2 -38    0.94    1.19
  -3   3 -36   22.57    1.54
  -3   4 -32    1.16    1.31
  -2   1 -39    0.74    1.38
  -2   2 -37   10.46    1.50
  -2   3 -34   -0.68    1.32
  -1  -2 -41   21.90    1.43
  -1   3 -31  499.02    3.12
  -1   4 -25    3.92    0.85
   0   0 -36  548.10    3.28
   0   2 -31   16.56    0.95
   0   3 -26    0.75    0.80
   0   3 -25    0.63    0.62
   1  -3 -36   -0.72    0.93
   1  -1 -34   17.06    0.95
   1   1 -30   10.95    0.95
   2  -2 -30   16.37    0.73
 -11   1 -37    0.33    0.58
 -11   2 -35    2.46    0.69
 -11   3 -32    0.16    0.76
 -10  -1 -41    4.23    0.58
 -10   2 -37    1.22    0.82
  -9   3 -36    1.37    1.09
  -9   4 -33   -0.93    1.12
  -8  -2 -44    1.94    0.68
  -8   1 -41   12.87    0.94
  -8   3 -37    6.17    1.17
  -8   4 -34   -0.65    1.23
  -7  -1 -44    1.96    0.93
  -7   1 -42    2.59    1.11
  -7   2 -40    7.76    1.25
  -7   4 -35    1.43    1.28
  -7   5 -31    7.88    1.37
  -7   6 -24    1.55    1.11
  -6  -4 -45    8.59    0.77
  -6  -3 -45    3.76    0.80
  -6  -2 -45    3.31    0.94
  -6   1 -42   84.23    1.62
  -6   6 -24   31.67    1.30
  -5  -4 -45    1.53    0.86
  -5  -3 -45   12.99    0.98
  -5  -2 -45    3.18    1.06
  -5   4 -35   22.27    1.60
  -5   5 -31    6.51    1.37
  -4  -4 -45    0.98    0.90
  -4  -3 -45   -0.41    1.10
  -4  -1 -44   -0.73    1.21
  -4   1 -42   -1.72    1.41
  -4   4 -34   13.88    1.28
  -4   6 -20    2.83    0.87
  -4   6 -19  124.85    1.53
  -4   6 -18    1.63    0.76
  -3  -4 -44    1.93    0.93
  -3  -2 -44    1.57    1.30
  -3   2 -39    2.93    1.42
  -3   4 -33   -1.12    1.35
  -3   5 -27  132.36    1.75
  -2  -4 -43   -0.68    1.01
  -2  -3 -43    0.17    0.99
  -2   3 -35    6.35    1.35
  -1   2 -35   29.20    1.28
  -1   3 -32    1.28    1.10
   0  -2 -39    1.68    0.99
   0   1 -35    8.44    1.16
   0   2 -32    3.42    0.88
   0   3 -27  488.31    2.72
   1  -2 -36    8.29    1.04
   1   1 -31    1.25    0.92
   2  -2 -31  101.17    1.34
 -11   3 -33    5.10    0.76
 -10   1 -39    1.55    0.71
 -10   4 -32    0.50    0.89
  -9   2 -39    8.76    0.95
  -9   5 -29    4.85    1.05
  -8   2 -40   -1.74    1.03
  -8   4 -35    2.64    1.20
  -8   5 -31    2.77    1.29
  -7  -3 -45    0.43    0.63
  -7  -2 -45    6.87    0.82
  -7   6 -25   21.92    1.24
  -6  -1 -45   16.73    1.02
  -6   2 -41    5.25    1.32
  -6   3 -39   51.56    1.68
  -6   5 -32    0.74    1.41
  -6   6 -26    0.23    1.16
  -6   6 -25    6.85    0.96
  -5  -5 -45    2.25    0.70
  -5  -1 -45    0.65    1.05
  -5   0 -44  114.98    1.88
  -5   2 -41  133.82    2.11
  -5   5 -32    2.85    1.34
  -5   6 -25    0.07    1.11
  -5   6 -24    0.97    0.86
  -4  -2 -45    1.61    0.95
  -4   3 -38   -0.88    1.23
  -4   5 -31   49.22    1.58
  -4   5 -30    7.07    1.08
  -4   6 -22  132.55    1.68
  -4   6 -21    3.67    0.76
  -3  -5 -44    0.17    0.83
  -3  -1 -44    4.83    1.33
  -3   2 -40   -1.08    1.43
  -3   3 -37    0.45    1.21
  -3   4 -34    3.37    1.44
  -3   5 -29    0.87    1.14
  -2   2 -38    4.46    1.23
  -2   4 -32   17.99    1.34
  -2   4 -31   -0.48    0.98
  -2   5 -24    3.94    0.77
  -1  -1 -41    1.45    1.10
  -1   0 -40    6.27    1.14
  -1   3 -33    0.46    1.15
  -1   4 -28   46.74    1.32
  -1   4 -27    1.65    0.78
   0  -3 -40    3.76    1.11
   0  -2 -40   11.83    1.32
   0   1 -36   18.91    1.32
   0   2 -33    9.79    0.98
   0   3 -29   -0.63    0.96
   0   3 -28    1.17    0.76
   1  -3 -37    1.26    1.00
   1  -2 -37    0.46    1.02
   1   0 -34    0.71    0.83
   1   1 -32    9.08    1.03
   1   2 -28    0.31    0.83
   1   2 -27    3.89    0.68
   2  -2 -32    2.68    0.81
   2  -1 -31  122.67    1.51
 -11   2 -36    0.59    0.62
  -9   1 -41   -0.42    0.77
  -8  -1 -44   -0.13    0.63
  -8   1 -42   -0.25    0.91
  -8   3 -38   13.41    1.02
  -8   6 -26   22.15    1.19
  -7  -1 -45   -0.27    0.78
  -7   0 -44   41.50    1.17
  -7   1 -43   29.60    1.19
  -7   3 -39    0.64    1.19
  -7   4 -36    0.63    1.01
  -7   6 -27    3.19    1.13
  -6  -3 -46    2.89    0.75
  -6   1 -43    1.40    0.98
  -6   5 -33   13.68    1.46
  -6   6 -27   72.40    1.68
  -5  -3 -46    3.91    0.92
  -5  -2 -46    0.36    0.94
  -5   6 -26   93.18    1.73
  -4  -5 -45    1.72    0.72
  -4  -1 -45    1.52    1.12
  -4   1 -43   17.84    1.55
  -4   4 -36    0.48    1.46
  -4   5 -32    4.51    1.33
  -4   6 -23    1.31    0.81
  -3  -4 -45    0.50    0.93
  -3  -3 -45   18.02    1.04
  -3  -2 -45    0.71    1.22
  -3   3 -38    2.39    1.48
  -2   3 -36    2.09    1.15
  -2   4 -33    1.45    1.28
  -2   5 -26  127.54    1.64
  -1   1 -39    4.39    1.15
  -1   2 -37   -0.97    1.35
  -1   3 -34    9.84    1.35
  -1   4 -29    2.15    0.87
   0   1 -37    1.24    1.19
   0   2 -34    4.85    1.14
   0   3 -30   35.97    1.24
   1  -1 -37    1.04    1.11
   1   1 -33    9.69    1.11
   2  -2 -33    1.56    0.82
   2  -1 -32    1.86    0.85
 -11   1 -38    0.09    0.50
 -11   3 -34    1.39    0.64
 -10   1 -40   18.55    0.76
 -10   3 -36    1.09    0.83
 -10   4 -33   -0.59    0.86
  -9   2 -40    4.15    0.84
  -9   4 -35    0.10    0.98
  -9   5 -31    0.40    1.05
  -8  -2 -45    0.88    0.56
  -8   2 -41    6.58    1.00
  -8   3 -39    3.38    1.05
  -8   5 -32    0.08    0.94
  -7   4 -37    1.24    1.25
  -7   6 -28    7.28    1.21
  -6  -4 -46    0.93    0.59
  -6   2 -42   42.46    1.35
  -5   1 -44   18.66    1.32
  -5   3 -40    3.12    1.43
  -4  -4 -46   17.18    0.93
  -4  -2 -46    4.57    1.11
  -4   2 -42    0.77    1.36
  -4   4 -37    4.27    1.50
  -4   6 -26   -0.38    1.10
  -3  -1 -45   24.75    1.38
  -3   1 -43    0.21    1.43
  -3   3 -39  184.55    2.41
  -3   5 -31    1.62    1.28
  -3   6 -22    1.61    0.89
  -3   6 -21   54.46    1.23
  -3   6 -20    7.21    0.87
  -2  -1 -44    4.03    1.25
  -2   3 -37    7.81    1.23
  -2   4 -34    2.83    1.32
  -2   5 -28    1.97    1.11
  -2   5 -27   -0.24    0.83
  -1  -4 -43    4.05    1.03
  -1   1 -40   16.08    1.49
  -1   2 -38   -0.33    1.39
  -1   3 -35   -0.37    1.34
  -1   4 -30    2.60    0.94
   0  -3 -41    1.16    0.87
   0  -2 -41   -0.49    1.23
   1   2 -30   -0.45    0.72
   2  -2 -34    2.42    0.89
   2  -1 -33    1.77    0.87
  -9   1 -42    0.60    0.66
  -9   3 -38   -0.65    0.80
  -8  -1 -45   10.78    0.70
  -8   0 -44   30.73    0.90
  -8   1 -43    2.63    0.82
  -8   4 -37    1.61    1.09
  -8   5 -33    4.28    1.20
  -7  -2 -46   10.56    0.70
  -7   2 -42   -1.66    0.91
  -7   3 -40   18.61    1.11
  -7   5 -34   -0.11    1.30
  -7   6 -29   -0.51    1.18
  -6  -1 -46    6.84    0.78
  -6   1 -44    4.45    0.92
  -5  -5 -46    0.97    0.56
  -5  -1 -46    2.07    0.81
  -5   2 -43    2.49    1.25
  -5   5 -34   15.82    1.24
  -5   6 -29  108.35    1.90
  -4  -1 -46    7.73    1.10
  -4   1 -44    0.70    1.30
  -4   6 -27    9.12    1.19
  -3  -4 -46    0.64    0.83
  -3  -3 -46   -0.30    1.02
  -3   4 -36    4.32    1.24
  -3   6 -24  258.34    2.27
  -2  -3 -45    9.55    1.12
  -2  -2 -45    1.06    1.22
  -2   3 -38    8.36    1.44
  -2   5 -29    3.21    0.97
  -1  -3 -44    1.84    1.05
  -1   0 -42    2.12    1.34
  -1   4 -32    5.07    1.27
  -1   5 -22    4.27    0.68
   0   0 -40   30.96    1.53
   0   1 -38   14.83    1.17
   0   3 -32    0.71    0.91
   0   4 -25   15.18    0.81
   1  -2 -39    2.14    1.09
   1  -1 -38  110.65    1.77
   1   2 -31    0.94    0.77
   2  -2 -35   24.68    1.07
   2  -1 -34   17.54    1.04
   2   0 -32    6.80    0.95
   2   1 -29    1.15    0.76
   2   1 -28  157.66    1.53
 -11   2 -37    0.05    0.48
 -11   3 -35   26.96    0.79
 -10   2 -39    3.52    0.65
 -10   3 -37   28.98    0.92
 -10   4 -34   29.85    1.01
  -9  -1 -44    4.67    0.50
  -9   4 -36   11.72    1.02
  -8   2 -42    0.84    0.90
  -8   3 -40    0.69    0.96
  -7   1 -44    1.69    0.81
  -7   4 -38    3.29    1.02
  -7   5 -35    0.35    1.24
  -6  -3 -47    1.53    0.62
  -6  -2 -47   -0.24    0.70
  -6   2 -43    3.14    0.99
  -6   3 -41    0.44    1.06
  -6   6 -30    0.84    1.22
  -5  -3 -47   19.42    0.81
  -5  -2 -47    9.41    0.92
  -5   0 -46    0.49    1.06
  -5   3 -41   64.04    1.60
  -5   5 -35    3.76    1.37
  -4  -3 -47    0.12    0.88
  -4  -2 -47    5.27    1.02
  -4   2 -43   23.09    1.47
  -4   4 -38    4.92    1.27
  -4   6 -28   36.41    1.29
  -3  -1 -46    0.97    1.14
  -3   1 -44    3.84    1.37
  -3   4 -37    3.08    1.25
  -3   6 -26    1.11    1.15
  -3   6 -25    2.91    0.89
  -2  -1 -45    4.21    1.25
  -2   0 -44    3.17    1.12
  -2   2 -41    3.87    1.25
  -2   5 -31    2.21    1.21
  -1  -2 -44    1.84    1.19
  -1   1 -41    1.15    1.16
  -1   2 -39    2.44    1.18
  -1   3 -37   19.00    1.50
  -1   4 -33    3.27    1.31
  -1   5 -26   14.02    1.05
  -1   5 -25  329.60    2.35
   0  -2 -42    5.85    1.05
   0   1 -39   10.84    1.35
   0   2 -37   16.90    1.41
   0   3 -33    5.16    1.01
   0   4 -28   19.52    1.13
   0   4 -27   36.30    1.07
   1  -1 -39    3.96    1.20
   1   0 -38   54.55    1.53
   1   2 -33   19.32    1.20
   1   3 -28    2.66    0.91
   2  -1 -35   -0.20    0.92
  -9   2 -41    0.37    0.64
  -9   3 -39    8.35    0.76
  -9   5 -33   12.04    1.03
  -8   1 -44    0.77    0.71
  -8   4 -38   53.15    1.37
  -7   2 -43    3.42    0.82
  -7   4 -39   -0.09    1.12
  -6  -1 -47    0.63    0.73
  -6   0 -46    1.55    0.77
  -6   1 -45   15.95    0.95
  -6   3 -42   13.15    1.24
  -5  -1 -47    6.14    0.90
  -5   2 -44   15.40    1.27
  -5   4 -39    0.37    1.20
  -5   6 -31    0.56    1.33
  -4  -4 -47    1.65    0.69
  -4   1 -45    0.85    1.06
  -4   5 -35    2.53    1.20
  -4   6 -30    2.30    1.37
  -3  -3 -47   -0.73    0.90
  -3   2 -43    4.48    1.40
  -3   4 -38   -0.34    1.45
  -3   6 -27   11.08    1.04
  -2  -3 -46    3.34    1.02
  -2  -2 -46   -1.32    1.14
  -2   5 -32   21.62    1.45
  -1   1 -42   -0.69    1.34
  -1   2 -40   51.76    1.56
  -1   4 -34   26.56    1.53
  -1   5 -28   69.33    1.51
  -1   5 -27    6.36    0.87
   0  -1 -42   23.58    1.25
   0   2 -38    1.02    1.29
   0   3 -34    5.54    1.06
   0   4 -30   27.86    1.28
   0   4 -29    2.81    0.88
   1  -2 -40   -1.66    1.07
   1   1 -37    1.96    1.20
   1   2 -34    0.56    1.13
   1   3 -29   22.14    0.96
   2  -2 -36   -0.76    0.92
   2   1 -31  130.21    1.56
 -10   2 -40   22.87    0.71
 -10   3 -38   -0.28    0.62
 -10   4 -35    0.47    0.71
  -9   0 -44    0.22    0.47
  -9   1 -43    3.39    0.59
  -9   4 -37    0.16    0.85
  -8   3 -41    9.55    0.93
  -8   6 -30    3.31    1.05
  -7   0 -46    3.31    0.64
  -7   3 -42   -0.34    0.97
  -7   5 -36    0.63    1.19
  -6   5 -37    3.93    1.25
  -6   7 -24   57.88    1.45
  -5  -3 -48    3.35    0.65
  -5  -2 -48   -0.08    0.73
  -5   1 -46    0.65    1.05
  -5   4 -40    1.03    1.34
  -5   6 -32   12.43    1.42
  -5   7 -23  151.87    1.86
  -4   2 -44    3.75    1.05
  -4   6 -31   24.90    1.53
  -3  -4 -47    1.58    0.75
  -3  -1 -47    0.08    1.08
  -3   1 -45   25.63    1.31
  -3   4 -39   74.57    1.97
  -3   5 -35    1.60    1.40
  -3   6 -29    0.55    1.27
  -2  -4 -46   -0.02    0.84
  -2  -1 -46    1.09    1.17
  -2   3 -40    4.29    1.21
  -2   4 -37    4.01    1.23
  -2   5 -33    4.27    1.44
  -2   6 -24   18.81    1.08
  -2   6 -23   50.58    1.15
  -1  -3 -45    0.97    0.99
  -1  -2 -45   -0.76    1.15
  -1  -1 -45    0.86    1.23
  -1   2 -41   22.53    1.64
  -1   3 -38    0.52    1.19
   0   0 -42   47.24    1.68
   1  -1 -40    0.06    0.97
   1   2 -35    1.46    1.18
   1   3 -31   27.86    1.23
   1   3 -30    3.30    0.83
   2  -1 -36    1.03    0.81
   2   1 -33    1.46    0.95
   2   1 -32    0.47    0.77
   2   2 -28    4.38    0.84
   2   2 -27    0.67    0.62
 -10   4 -36    3.59    0.75
  -9   2 -42   10.77    0.69
  -9   5 -34    0.01    0.86
  -8   4 -39    6.98    0.97
  -8   5 -36    0.62    1.04
  -8   6 -31   -0.18    1.01
  -7  -1 -47    2.59    0.55
  -7   2 -44    0.19    0.73
  -7   4 -40   18.95    1.17
  -7   5 -37   65.60    1.58
  -6   7 -26    3.10    1.09
  -6   7 -25    1.19    1.07
  -5  -1 -48    0.52    0.78
  -5   2 -45    3.69    1.13
  -5   3 -43    0.11    1.04
  -5   6 -33    3.24    1.43
  -4  -3 -48    2.24    0.74
  -4  -2 -48    1.51    0.83
  -4  -1 -48    1.97    0.88
  -4   1 -46    6.59    1.02
  -4   2 -45    2.32    1.22
  -4   3 -43    2.56    1.35
  -4   4 -40   65.55    1.64
  -4   6 -32    2.73    1.39
  -4   7 -22   20.33    1.10
  -4   7 -21    1.47    0.99
  -4   7 -20   -0.46    0.90
  -4   7 -19   21.00    1.05
  -3   2 -44    0.55    1.11
  -3   3 -42    8.89    1.23
  -3   5 -36   57.63    1.82
  -3   6 -30    2.97    1.09
  -2  -2 -47   -0.53    1.02
  -2   1 -45    2.79    1.34
  -2   4 -38  194.12    2.35
  -2   6 -27    1.40    1.17
  -1   4 -36    2.53    1.39
   0  -3 -44   -0.17    0.97
   0   1 -41    3.86    1.12
   0   2 -39    0.68    1.12
   1  -1 -41    3.68    1.21
   1   1 -38  112.04    1.76
   1   2 -36    6.37    1.25
   1   3 -32    1.07    0.89
   2  -2 -38   21.28    1.16
   2  -1 -37   23.59    1.20
   2   0 -36   24.06    1.23
   2   1 -34   18.59    1.17
   2   2 -29   -0.13    0.69
   3  -1 -31    8.01    0.79
   3  -1 -30   35.13    0.87
 -10   3 -39   -1.02    0.52
  -9   5 -35    6.01    0.90
  -8   0 -46    1.26    0.51
  -8   3 -42    0.03    0.80
  -8   6 -32   14.75    1.15
  -7   1 -46   25.56    0.89
  -7   3 -43    2.46    0.93
  -6  -1 -48    0.50    0.61
  -6   4 -41    2.76    0.98
  -6   5 -38    2.54    1.19
  -6   7 -27    3.27    1.15
  -5   1 -47    5.03    0.98
  -5   4 -41   18.40    1.24
  -5   7 -27    1.53    1.19
  -5   7 -26    4.47    1.15
  -4  -4 -48   -0.01    0.54
  -4   4 -41    1.97    1.38
  -4   6 -33    3.61    1.11
  -4   7 -25  159.28    1.96
  -4   7 -24   10.20    1.17
  -4   7 -23    1.56    0.90
  -3  -3 -48   13.75    0.87
  -3  -1 -48    9.21    1.07
  -3   1 -46    0.53    1.05
  -3   2 -45    3.86    1.31
  -3   3 -43    0.42    1.38
  -2   4 -39    1.39    1.42
  -2   5 -35    6.69    1.24
  -2   6 -28   10.38    1.07
  -1  -3 -46    8.46    1.06
  -1  -2 -46   16.96    1.20
  -1  -1 -46   10.11    1.24
  -1   2 -42    1.15    1.24
  -1   3 -40    1.42    1.23
  -1   4 -37   18.88    1.56
   0   1 -42   22.60    1.45
   0   3 -37   10.92    1.20
   0   4 -33    2.83    1.04
   0   5 -26    1.68    0.94
   0   5 -24  122.72    1.50
   1  -2 -42   10.08    1.17
   1   1 -39    4.93    1.06
   1   2 -37    1.26    1.26
   1   4 -27    0.33    0.91
   1   4 -25   14.90    0.79
   2  -1 -38    1.22    1.11
   2   2 -32    1.86    0.99
   2   2 -31  105.61    1.50
   3  -1 -32   12.72    0.88
   3   0 -30   65.79    1.20
  -9   2 -43    0.40    0.51
  -9   3 -41    0.80    0.59
  -8   2 -44    3.24    0.61
  -8   5 -37    2.69    0.95
  -8   6 -33    1.61    1.03
  -7   2 -45    7.35    0.72
  -7   4 -41    6.21    0.85
  -7   5 -38    0.01    0.90
  -7   6 -34   56.24    1.50
  -6   0 -48    3.25    0.67
  -6   1 -47    1.38    0.81
  -6   3 -44   -0.46    0.94
  -6   4 -42   19.54    1.16
  -6   5 -39   68.03    1.58
  -5  -3 -49   -0.21    0.50
  -5  -2 -49   -0.69    0.61
  -5   0 -48    6.59    0.73
  -5   3 -44   -0.79    0.95
  -5   4 -42    0.33    1.20
  -5   5 -39    2.94    1.34
  -5   7 -28   -0.40    1.23
  -4  -3 -49    1.97    0.71
  -4  -2 -49    1.58    0.73
  -4   0 -48    0.70    0.76
  -4   1 -47    0.95    0.94
  -4   2 -46    5.45    1.19
  -4   4 -42    0.88    1.27
  -4   6 -34   77.05    1.69
  -3   5 -38    1.85    1.41
  -3   6 -33    1.74    1.37
  -2  -2 -48    1.06    0.93
  -2   1 -46    0.16    1.28
  -2   4 -40    2.44    1.45
  -1   5 -33   -1.67    1.09
  -1   6 -24    1.12    0.97
  -1   6 -22   66.14    1.30
   0  -3 -45    2.07    1.00
   0   1 -43    6.50    1.32
   0   2 -41    1.76    1.40
   0   3 -38   -0.28    1.14
   0   4 -35    0.17    1.36
   0   5 -28    1.75    0.86
   0   5 -27   53.12    1.22
   1  -1 -42    1.76    1.01
   1   1 -40    1.05    1.25
   1   2 -38   98.61    1.89
   1   3 -35    4.17    1.27
   1   3 -34    5.17    1.01
   1   4 -28    3.69    0.83
   2  -2 -39    1.88    1.01
   2  -1 -39   -0.70    1.11
   2   0 -38   28.43    1.32
   2   1 -36    1.10    1.19
   2   2 -33    0.76    1.07
   2   3 -26    2.34    0.77
   3  -1 -33  278.11    2.14
 -10   4 -37    3.53    0.56
  -9   5 -36   -0.13    0.77
  -8   1 -46    0.50    0.50
  -8   3 -43   -0.57    0.66
  -8   5 -38   11.06    0.97
  -7   3 -44    0.43    0.80
  -7   6 -35   10.61    1.22
  -6   7 -29    1.05    1.12
  -5  -1 -49   -0.41    0.66
  -5   3 -45   11.96    1.13
  -5   7 -29    1.78    1.23
  -4  -1 -49   27.61    0.99
  -4   6 -35    6.51    1.22
  -4   7 -28   51.17    1.58
  -3  -3 -49    0.40    0.75
  -3  -2 -49    7.14    0.91
  -3   0 -48   71.23    1.29
  -3   4 -42    7.07    1.41
  -3   7 -23    1.86    0.87
  -3   7 -22    4.33    0.84
  -3   7 -19   -0.50    0.68
  -2  -1 -48    4.61    1.11
  -2   2 -45    3.29    1.33
  -2   3 -43   -0.62    1.19
  -2   5 -37    3.24    1.23
  -2   6 -31    6.63    1.12
  -1  -3 -47    8.46    0.96
  -1  -2 -47    2.45    1.01
  -1  -1 -47    0.49    1.09
  -1   0 -46   10.33    1.11
  -1   1 -45   -1.09    1.06
  -1   4 -39    4.79    1.50
  -1   5 -34   26.18    1.34
  -1   6 -27    6.30    1.12
  -1   6 -26    0.34    0.88
  -1   6 -25  150.46    1.77
   0  -1 -45    6.66    1.04
   0   2 -42    2.74    1.36
   0   3 -39   73.56    1.69
   0   5 -30   40.64    1.27
   1  -1 -43    2.20    1.21
   1   1 -41    1.12    1.27
   1   2 -39    3.66    1.35
   1   4 -30   -0.90    0.89
   2  -2 -40   33.98    1.27
   2   1 -37   21.87    1.35
   2   3 -29   49.20    1.25
   3  -1 -34    3.61    0.94
  -9   3 -42    0.70    0.51
  -8   2 -45    0.52    0.54
  -8   4 -41   -0.09    0.77
  -7   4 -42   -0.43    0.76
  -7   6 -36    1.47    1.05
  -7   7 -30    2.80    1.04
  -6  -1 -49    4.23    0.53
  -6   1 -48    0.79    0.68
  -6   3 -45    4.13    0.91
  -6   5 -40    1.27    1.10
  -6   6 -36   20.58    1.19
  -5   1 -48    0.94    0.72
  -5   2 -47    8.83    0.97
  -5   4 -43    1.04    0.97
  -5   7 -31   28.19    1.45
  -4   1 -48    1.58    0.82
  -4   2 -47    4.47    1.11
  -4   3 -45    0.45    1.04
  -4   4 -43    1.53    1.25
  -4   5 -40   22.05    1.33
  -4   7 -30    2.09    1.29
  -4   7 -29    1.11    1.02
  -3  -1 -49    0.81    0.82
  -3   1 -48    9.48    1.07
  -3   3 -45   17.37    1.35
  -3   7 -28   -1.27    1.18
  -3   7 -27    1.85    1.20
  -3   7 -26    1.08    0.95
  -2   1 -47   11.31    1.23
  -1   1 -46   10.90    1.33
  -1   4 -40  451.41    3.39
  -1   5 -36   -1.06    1.47
  -1   6 -28   12.76    1.04
   0  -2 -46    1.21    1.05
   0  -1 -46    1.02    1.13
   0   3 -40    4.57    1.22
   0   4 -37    1.46    1.38
   0   5 -32    2.36    1.32
   1   2 -40   -0.74    1.29
   1   3 -37    2.30    1.35
   1   4 -32   48.55    1.34
   2  -1 -40    6.10    0.96
   2   2 -35   26.94    1.16
   2   3 -31  404.27    2.77
   2   3 -30    1.53    0.80
   3  -1 -35   15.90    1.07
   3   1 -30   37.34    1.00
  -9   4 -40    3.91    0.60
  -9   5 -37    2.10    0.69
  -8   5 -39    0.79    0.81
  -8   6 -35   -0.50    0.91
  -7   3 -45   -0.44    0.68
  -7   4 -43   11.96    0.89
  -7   5 -40    8.18    0.97
  -6   2 -47    0.65    0.76
  -6   5 -41   -0.34    1.01
  -5   3 -46    2.77    0.95
  -5   4 -44   21.58    1.18
  -5   5 -41   24.22    1.32
  -5   6 -37    2.56    1.13
  -4  -2 -50    1.29    0.62
  -4  -1 -50    0.26    0.69
  -4   3 -46   22.02    1.23
  -4   7 -31    4.67    1.33
  -3   2 -47    0.19    1.09
  -3   4 -43   -0.72    1.14
  -3   6 -36  109.11    2.07
  -3   7 -29    3.06    1.31
  -2  -3 -49    1.61    0.76
  -2  -2 -49    1.05    0.87
  -2  -1 -49    0.17    0.98
  -2   2 -46   -0.85    1.07
  -2   6 -34    4.72    1.20
  -2   7 -24    0.85    1.10
  -2   7 -23  180.57    2.03
  -2   7 -21   -0.84    0.92
  -1  -2 -48   -0.09    0.95
  -1  -1 -48   -0.16    0.98
  -1   2 -45   -2.66    1.27
  -1   5 -37  376.75    3.20
  -1   6 -31   13.23    1.40
  -1   6 -30    2.46    1.03
   0   0 -46    0.89    1.20
   0   2 -43    3.41    1.19
   0   4 -38   -0.86    1.38
   0   5 -33   32.68    1.35
   1   1 -42   -0.21    1.02
   1   4 -34   19.98    1.44
   1   5 -24    1.29    0.82
   2  -1 -41   -0.80    1.13
   2   0 -40    3.61    0.99
   2   1 -39    1.02    1.30
   2   2 -36   -0.78    0.97
   2   3 -32   10.05    0.97
   3  -1 -36   59.34    1.35
   3   1 -33  262.42    2.26
   3   2 -28    1.18    0.79
   3   2 -27   -0.39    0.72
  -8   3 -44    0.55    0.53
  -8   6 -36    5.83    0.94
  -7   6 -37    8.88    1.07
  -7   7 -32   15.97    1.17
  -6   3 -46    2.51    0.80
  -6   4 -44   -0.94    0.88
  -6   7 -33   45.27    1.48
  -5  -1 -50    5.13    0.57
  -5   6 -38   33.95    1.32
  -4   1 -49   29.61    1.04
  -4   2 -48    1.13    0.95
  -4   4 -44    1.74    1.02
  -4   6 -38   -0.60    1.36
  -4   7 -32    3.40    1.16
  -3  -3 -50    0.01    0.61
  -3  -2 -50   -0.62    0.67
  -3  -1 -50   -0.19    0.81
  -3   3 -46   -0.18    1.16
  -3   4 -44    3.01    1.33
  -3   5 -41    5.30    1.41
  -3   7 -31   -0.05    1.35
  -3   7 -30    6.63    1.13
  -2   2 -47    0.40    1.18
  -2   4 -43    0.23    1.39
  -2   7 -26    3.49    0.99
  -2   7 -25    0.51    0.96
  -2   7 -19    6.92    0.73
  -2   7 -18    1.12    0.75
  -1   0 -48    0.66    1.07
  -1   1 -47    1.26    1.21
  -1   4 -41    0.40    1.19
  -1   5 -38    2.87    1.57
  -1   6 -32   -1.10    1.09
   0  -2 -47   -0.95    0.99
   0  -1 -47    3.35    1.12
   0   3 -42   -1.34    1.44
   0   4 -39    8.93    1.48
   0   5 -35   -0.03    1.44
   0   5 -34    3.05    1.17
   0   6 -25    0.11    0.99
   0   6 -24  268.13    2.27
   0   6 -22    0.00    0.83
   0   6 -21    0.60    0.77
   1  -2 -45    1.25    1.03
   1   1 -43    4.34    1.31
   1   2 -41    6.35    1.17
   1   4 -35   37.31    1.38
   1   5 -28    1.24    1.07
   1   5 -26   68.24    1.29
   1   5 -25    0.19    0.73
   2  -1 -42    0.79    1.10
   2   1 -40    6.15    1.27
   2   4 -27    0.14    0.92
   2   4 -25  225.01    1.93
   2   4 -24   28.53    0.96
   3  -1 -37    2.31    1.03
   3   1 -34    2.90    1.03
   3   2 -30  154.33    1.76
   3   2 -29    0.25    0.69
  -9   4 -41    0.33    0.49
  -9   5 -38    1.20    0.58
  -8   5 -40    0.17    0.72
  -7   5 -41    4.07    0.84
  -7   6 -38    7.61    0.97
  -7   7 -33    1.10    0.99
  -6   1 -49    3.77    0.58
  -6   2 -48   54.94    1.00
  -6   5 -42    2.06    1.00
  -6   7 -34    2.38    1.14
  -5   0 -50    7.45    0.62
  -5   3 -47   18.29    0.97
  -5   4 -45    0.90    0.97
  -4   3 -47    0.79    0.99
  -4   5 -42   -1.00    1.04
  -4   7 -33    2.04    1.16
  -3   0 -50    0.78    0.84
  -3   1 -49    1.41    0.80
  -3   5 -42    4.01    1.35
  -2  -2 -50   37.26    0.97
  -2   3 -46    3.72    1.27
  -2   6 -36   -0.29    1.19
  -2   7 -29    6.02    1.34
  -2   7 -28    3.24    1.06
  -1  -2 -49    5.67    0.89
  -1  -1 -49    4.78    0.99
  -1   2 -46   17.55    1.24
  -1   5 -39    2.21    1.48
  -1   6 -34   33.03    1.71
   0   4 -40   30.84    1.68
   0   6 -29   -1.07    1.16
   0   6 -28    5.75    1.15
   0   6 -27   25.44    1.11
   1   2 -42   10.95    1.20
   1   3 -40    2.80    1.48
   1   4 -36    0.23    1.12
   1   5 -30    2.55    0.98
   1   5 -29  145.35    1.83
   2   2 -39    3.22    1.25
   2   2 -38   23.89    1.23
   2   3 -35   -0.54    0.99
   2   4 -30    3.40    1.08
   2   4 -29   -0.40    0.83
   3  -1 -38   -0.90    1.03
   3   1 -35   16.08    1.05
  -8   4 -43   -0.78    0.54
  -8   6 -37   -0.52    0.77
  -7   3 -46    4.32    0.55
  -7   4 -44    3.27    0.64
  -7   7 -34   27.01    1.23
  -6   3 -47    1.67    0.69
  -6   6 -39   11.23    0.97
  -6   7 -35    4.73    1.12
  -5   5 -43    2.21    1.07
  -5   6 -40    0.02    1.15
  -5   7 -35  144.53    2.03
  -4  -1 -51    0.26    0.55
  -4   1 -50   -1.30    0.70
  -4   2 -49    2.40    0.86
  -4   5 -43   20.69    1.32
  -4   8 -23    1.13    1.06
  -3   3 -47    0.03    0.94
  -3   4 -45    3.37    1.04
  -3   7 -34    0.09    1.35
  -2  -1 -50   -0.62    0.72
  -2   0 -50    3.03    0.93
  -2   1 -49    0.74    0.98
  -2   2 -48    0.25    1.11
  -2   4 -44   88.35    1.71
  -2   6 -37   13.08    1.31
  -2   7 -31    6.15    1.39
  -2   7 -30   -0.58    1.10
  -1   1 -48   -1.32    1.11
  -1   2 -47    1.48    1.25
  -1   3 -45    0.67    1.16
   0  -2 -48    6.53    0.98
   0  -1 -48    0.05    1.03
   0   2 -45   -0.54    1.13
   0   4 -41    1.91    1.46
   0   6 -31    6.65    1.35
   0   6 -30   13.07    1.12
   1  -2 -46    0.37    1.01
   1   5 -32    1.57    1.04
   2  -1 -43    4.07    1.13
   2   1 -41   -0.14    1.12
   2   3 -37   12.25    1.40
   2   4 -32   -1.50    1.15
   3  -1 -39   19.15    1.17
   3   1 -37    0.82    1.09
   3   1 -36   59.95    1.35
   3   2 -34    3.62    1.15
   3   2 -33   15.83    1.01
   3   3 -27  256.21    2.06
  -8   5 -41   19.46    0.77
  -7   5 -42   -0.09    0.67
  -6   5 -43   -0.67    0.84
  -6   6 -40    1.09    1.01
  -5   1 -50    4.45    0.57
  -5   2 -49    0.05    0.61
  -5   4 -46    3.65    0.89
  -5   7 -36    0.65    1.24
  -4   3 -48    2.15    0.89
  -4   4 -46   17.80    1.10
  -4   6 -40   21.47    1.23
  -4   8 -27    0.64    1.20
  -4   8 -25   37.60    1.21
  -3   1 -50   -0.71    0.69
  -3   5 -43    1.46    1.10
  -3   7 -35    5.89    1.37
  -2   3 -47  135.10    1.90
  -2   4 -45    3.07    1.26
  -2   5 -42    1.48    1.14
  -2   7 -33    3.97    1.40
  -2   7 -32    9.07    1.17
  -1   6 -36   11.43    1.30
  -1   7 -25   20.43    1.10
  -1   7 -21    1.52    0.76
  -1   7 -20    2.65    0.83
  -1   7 -19    3.77    0.80
   0   1 -47    1.90    1.00
   0   2 -46   -0.75    1.30
   0   5 -38    1.38    1.20
   0   6 -32   -0.72    1.11
   1   0 -46    0.05    1.18
   1   3 -42   -0.54    1.35
   1   4 -39    1.67    1.47
   1   5 -34    6.09    1.34
   2   1 -42   -0.16    1.04
   2   2 -40   33.67    1.33
   2   3 -38    1.78    1.36
   2   4 -34   59.41    1.66
   3   1 -38   -1.86    1.15
   3   3 -29   13.52    0.88
   3   3 -28    0.00    0.72
   4   0 -30    0.86    0.71
  -7   4 -45    0.47    0.59
  -6   2 -49    6.71    0.58
  -6   7 -36   24.80    1.19
  -5   6 -41    0.21    1.04
  -5   7 -37    5.67    1.21
  -5   8 -29   37.88    1.36
  -4   5 -44    0.72    0.92
  -4   7 -37   32.30    1.50
  -4   8 -29    1.65    1.26
  -4   8 -28    3.89    1.21
  -3   3 -48   14.53    0.96
  -3   5 -44    0.94    1.23
  -3   8 -26    0.61    1.20
  -3   8 -25   -0.68    1.14
  -3   8 -24   12.21    1.25
  -3   8 -22    6.16    1.16
  -3   8 -21    1.45    1.02
  -3   8 -20   11.93    1.02
  -2  -2 -51   -0.30    0.60
  -2  -1 -51   -0.35    0.74
  -2   1 -50   -1.12    0.85
  -2   2 -49   -0.50    0.95
  -2   5 -43    1.54    1.34
  -1  -2 -50    0.12    0.74
  -1  -1 -50    2.42    0.88
  -1   0 -50    0.74    0.92
  -1   1 -49    4.72    1.05
  -1   2 -48    2.08    1.14
  -1   7 -30    3.04    1.30
  -1   7 -29    1.42    1.05
   0  -2 -49    1.98    0.90
   0  -1 -49    0.41    0.94
   0   1 -48    0.03    1.10
   0   3 -45    1.97    1.35
   0   5 -39   78.70    1.75
   1  -1 -47    1.85    1.06
   1   1 -46    0.00    1.23
   1   4 -40    2.65    1.48
   1   5 -36    2.16    1.37
   1   5 -35  164.38    2.15
   2   1 -43    3.83    1.36
   2   2 -41    7.82    1.13
   2   3 -39    0.83    1.38
   2   4 -35   -0.21    1.26
   3   1 -39   22.16    1.36
   3   2 -37    5.80    1.22
   3   2 -36   18.79    1.14
   3   3 -32    8.04    0.94
   3   3 -31    1.10    0.83
   4   0 -32  340.71    2.34
   4   1 -30    1.77    0.79
   4   1 -29   10.95    0.86
   4   1 -28    1.63    0.74
  -8   5 -42    0.91    0.52
  -7   6 -40   53.38    1.10
  -7   7 -36    0.86    0.90
  -6   3 -48    8.98    0.59
  -6   6 -41   -1.36    0.85
  -6   7 -37   -0.27    1.02
  -5   2 -50    8.24    0.65
  -5   7 -38    0.48    1.12
  -4   1 -51    0.41    0.57
  -4   3 -49    2.30    0.77
  -4   4 -47    2.99    0.82
  -4   5 -45    2.59    0.98
  -4   6 -42    0.77    1.08
  -3   1 -51   36.16    0.94
  -3   2 -50   -0.06    0.83
  -3   4 -47    0.49    1.04
  -3   6 -41   -1.24    1.09
  -3   8 -28    0.83    1.26
  -2   4 -46    1.63    1.00
  -2   6 -40    0.70    1.23
  -2   7 -35   83.46    1.75
  -1   3 -47    9.13    1.11
  -1   6 -38   -0.40    1.23
  -1   7 -32    4.53    1.38
   0   2 -47   -0.59    1.01
   0   6 -35    2.62    1.23
   1   4 -41    2.47    1.43
   1   6 -30    9.13    1.27
   1   6 -29    1.60    1.21
   1   6 -28    2.01    0.94
   1   6 -27    0.70    0.89
   1   6 -25    1.93    0.81
   1   6 -24   26.05    0.97
   1   6 -23  124.05    1.53
   2   3 -40   18.54    1.52
   2   4 -37   14.87    1.44
   2   4 -36   -1.46    1.10
   2   5 -30    3.51    1.16
   2   5 -29   26.63    1.13
   2   5 -28    9.01    0.94
   2   5 -27   -0.06    0.81
   2   5 -26    4.96    0.83
   2   5 -25  353.55    2.40
   2   5 -24   -0.56    0.69
   3  -1 -41    3.51    0.89
   3   1 -40    7.03    1.27
   3   2 -38    0.66    1.27
   3   3 -34   10.03    1.20
   4   1 -32    1.37    0.96
   4   1 -31   -0.34    0.70
  -7   4 -46   12.75    0.59
  -7   6 -41    1.54    0.78
  -6   4 -47    0.16    0.58
  -6   6 -42   39.19    1.06
  -6   7 -38   -1.48    0.92
  -6   8 -32   -0.83    0.98
  -5   3 -49    0.17    0.58
  -5   5 -45    3.23    0.76
  -5   8 -32   87.09    1.68
  -4   7 -38    1.67    1.07
  -3  -1 -52    0.92    0.53
  -3   0 -52    0.12    0.57
  -3   3 -49    0.01    0.78
  -3   5 -45   47.62    1.28
  -3   7 -38    0.03    1.33
  -3   8 -31    6.95    1.32
  -2   2 -50   37.40    1.14
  -2   4 -47   -1.68    1.08
  -2   6 -41    1.72    1.13
  -2   7 -36    1.59    1.18
  -2   8 -27    0.62    1.20
  -2   8 -26    9.39    1.33
  -2   8 -25    2.06    1.29
  -2   8 -24    0.01    1.18
  -2   8 -21    5.15    1.05
  -1  -2 -51   -0.30    0.68
  -1  -1 -51    1.42    0.76
  -1   1 -50    0.24    0.94
  -1   2 -49    5.40    0.96
  -1   4 -46   91.93    1.79
  -1   5 -43   85.58    1.73
   0   3 -46    0.08    1.11
   0   4 -44    1.01    1.21
   0   7 -22    1.93    0.94
   1  -1 -48    5.90    1.02
   1   0 -48    2.57    1.04
   1   1 -47    2.64    1.22
   1   2 -46    0.80    1.27
   1   5 -38    9.03    1.45
   1   6 -32   20.34    1.50
   1   6 -31    1.60    1.08
   2   2 -43    7.27    1.28
   2   5 -32    2.10    1.23
   3  -1 -42   -0.09    1.05
   3   0 -42   52.58    1.49
   3   1 -41    5.31    1.21
   3   2 -39   16.53    1.41
   3   3 -35    0.79    0.99
   3   4 -30  139.26    1.85
   3   4 -29   -0.04    1.00
   3   4 -28    3.32    0.93
   3   4 -27   14.26    0.86
   3   4 -26    0.27    0.69
   4   1 -34    4.72    1.05
   4   1 -33   22.47    0.99
   4   2 -29    3.05    0.86
   4   2 -28   11.41    0.88
   4   2 -27    3.09    0.78
  -7   7 -37   30.76    0.98
  -6   5 -45   15.29    0.79
  -6   8 -33    1.26    0.99
  -5   4 -48    0.17    0.65
  -5   6 -43    0.39    0.96
  -5   7 -39    3.52    1.04
  -5   8 -33    7.43    1.16
  -4   2 -51    1.71    0.63
  -4   4 -48    0.14    0.70
  -4   5 -46    1.08    0.89
  -4   6 -43    2.91    0.93
  -3   4 -48   29.24    1.11
  -3   5 -46    1.81    1.06
  -3   6 -43    0.65    1.18
  -3   7 -39    2.34    1.31
  -3   8 -32    4.70    1.33
  -2   0 -52   -0.09    0.64
  -2   3 -49    2.90    0.84
  -2   5 -45    0.99    1.05
  -2   6 -42   -0.63    1.30
  -2   8 -30    2.85    1.31
  -2   8 -29    3.99    1.36
  -2   8 -20   44.16    1.10
  -2   8 -19    1.91    0.89
  -1   3 -48    6.41    1.00
  -1   5 -44   13.85    1.39
  -1   7 -35   13.72    1.38
   0  -1 -50    0.06    0.81
   0   0 -50    0.64    0.94
   0   3 -47   -0.56    1.25
   0   4 -45   16.22    1.49
   0   7 -31    5.16    1.41
   0   7 -30   40.49    1.40
   0   7 -29    1.41    1.06
   0   7 -20    2.71    0.70
   0   7 -19    1.06    0.77
   1   3 -45    4.83    1.39
   1   5 -39    2.63    1.26
   1   6 -33   -0.05    1.15
   2  -1 -46   10.78    1.05
   2   0 -46    6.55    1.20
   2   4 -39    2.45    1.44
   2   5 -34    1.92    1.35
   2   5 -33    3.99    1.12
   3  -1 -43    1.30    1.01
   3   2 -40    0.63    1.38
   3   3 -37   -0.59    1.23
   3   4 -32   -0.12    1.15
   3   4 -31   10.23    1.01
   4   1 -35  313.97    2.49
   4   2 -32   32.24    1.23
  -8   6 -40    0.62    0.50
  -7   6 -42   -0.27    0.68
  -7   7 -38    2.57    0.75
  -6   7 -39   29.52    1.06
  -6   8 -34   -0.03    0.93
  -5   3 -50    2.88    0.54
  -5   7 -40   -0.27    1.01
  -5   8 -34   -1.48    0.86
  -4   1 -52    0.70    0.48
  -4   3 -50    1.47    0.61
  -4   6 -44    6.76    1.01
  -4   7 -40    5.22    1.13
  -4   8 -35    2.30    1.19
  -3   1 -52    0.29    0.52
  -3   3 -50    0.23    0.68
  -2   2 -51    0.27    0.80
  -2   5 -46   -0.45    1.12
  -2   6 -43    1.55    1.30
  -2   7 -39    9.48    1.41
  -2   8 -18    8.01    0.74
  -2   8 -17   72.87    1.22
  -1   1 -51    1.15    0.84
  -1   2 -50    0.27    0.83
  -1   3 -49   13.93    1.13
  -1   4 -47    4.57    1.07
  -1   5 -45   -0.09    1.23
  -1   6 -41    0.19    1.24
  -1   7 -36    2.04    1.21
   0   1 -50    1.48    1.01
   0   2 -49    0.71    1.10
   0   5 -43    1.59    1.36
   0   7 -33  318.72    2.97
   0   7 -32    1.40    1.16
   1  -1 -49    1.39    0.92
   1   1 -48    5.43    0.98
   1   2 -47    4.71    1.03
   1   5 -40   -0.76    1.17
   1   6 -35    0.76    1.22
   2  -1 -47    6.12    1.11
   2   1 -46   11.22    1.31
   2   4 -40   57.20    1.80
   2   5 -36    4.58    1.48
   3   1 -42   -1.15    1.02
   3   3 -38    0.75    1.08
   4   0 -38    3.79    1.10
  -6   5 -46    0.05    0.55
  -6   7 -40    1.57    0.80
  -6   8 -35    1.88    0.99
  -5   6 -44   47.51    1.11
  -4   4 -49    0.69    0.72
  -4   7 -41    4.59    1.12
  -4   8 -36    2.95    1.16
  -3   4 -49    2.26    0.84
  -3   5 -47    0.42    0.90
  -3   6 -44    1.56    0.92
  -2   1 -52    0.46    0.59
  -2   8 -33    1.23    1.40
  -1  -1 -52   -0.09    0.62
  -1   6 -42    1.31    1.14
  -1   8 -27    0.66    1.08
  -1   8 -26    0.95    1.05
  -1   8 -22  329.52    2.58
   0  -1 -51    2.15    0.78
   0   3 -48   13.75    1.08
   0   5 -44    0.47    1.32
   0   7 -35    2.39    1.47
   0   7 -34    0.57    1.22
   1   1 -49    2.26    1.06
   1   2 -48    0.08    1.08
   1   3 -46   -1.37    1.07
   1   4 -44   31.76    1.44
   1   5 -41    7.31    1.23
   1   6 -37    4.84    1.52
   1   6 -36    2.38    1.23
   2   4 -41   10.38    1.25
   2   6 -29    6.67    1.27
   2   6 -28   28.11    1.37
   2   6 -27    1.55    1.07
   2   6 -26    0.97    1.01
   2   6 -25   15.61    1.10
   2   6 -24    0.28    0.93
   3   1 -43    1.95    0.99
   3   3 -40    0.68    1.30
   3   4 -36  117.62    2.04
   3   4 -35    4.24    1.11
   4   1 -38    9.84    1.23
   4   2 -36   15.10    1.29
   4   3 -30    1.04    1.00
   4   3 -29  333.55    2.38
   4   3 -27    0.82    0.70
   4   3 -26   13.73    0.77
   4   3 -25    0.46    0.72
  -6   6 -44    0.27    0.60
  -5   4 -49    0.23    0.51
  -5   5 -47    4.82    0.59
  -5   8 -36    1.41    0.81
  -4   3 -51    1.48    0.56
  -4   6 -45   -0.71    0.85
  -4   8 -37   12.27    1.21
  -3   2 -52    0.60    0.57
  -3   6 -45    1.28    1.01
  -3   7 -41    0.67    0.97
  -3   8 -36    2.46    1.30
  -2   2 -52    0.55    0.66
  -2   4 -49   -0.05    0.80
  -2   5 -47   60.82    1.40
  -2   8 -34    5.49    1.19
  -1   4 -48    1.71    0.92
  -1   5 -46   18.93    1.14
  -1   6 -43    1.16    1.14
  -1   8 -32    2.51    1.34
  -1   8 -30   -0.94    1.21
  -1   8 -19    5.49    0.89
   0   1 -51    3.59    0.88
   0   2 -50    0.34    0.96
   0   3 -49    0.85    1.03
   0   4 -47    0.89    1.19
   0   7 -36    1.39    1.44
   1  -1 -50    8.96    0.89
   1   0 -50   12.13    1.01
   1   3 -47    3.80    1.21
   1   4 -45    4.47    1.31
   1   6 -38   95.16    1.87
   1   7 -30    1.50    1.36
   1   7 -29    4.49    1.29
   1   7 -28    4.52    1.07
   1   7 -27    0.75    1.00
   1   7 -25   -0.21    0.87
   1   7 -24   10.87    0.96
   1   7 -23  102.91    1.60
   1   7 -22    2.21    0.94
   2  -1 -48    0.74    0.86
   2   1 -47    3.92    1.14
   2   4 -42    4.14    1.18
   2   5 -39    0.85    1.50
   2   5 -38    8.04    1.28
   2   6 -32    1.43    1.35
   2   6 -31   14.54    1.22
   2   6 -23   -0.31    0.70
   2   6 -21   -0.09    0.77
   3   2 -43    3.31    1.37
   3   3 -41    4.60    1.32
   3   4 -37    2.83    1.14
   3   5 -29    0.36    0.93
   3   5 -25    8.23    0.83
   4   0 -40   -0.16    1.08
   4   1 -39    1.49    1.19
   4   2 -37    0.09    1.18
   4   3 -34    8.63    1.23
  -6   7 -41    0.05    0.72
  -6   8 -36   62.74    1.23
  -5   6 -45    4.76    0.68
  -5   7 -42    0.13    0.85
  -4   4 -50    1.32    0.61
  -4   7 -42   -0.52    0.87
  -4   8 -38    0.40    1.06
  -4   9 -29    1.53    1.11
  -4   9 -28    1.82    1.13
  -4   9 -27    1.74    1.08
  -3   4 -50    0.50    0.71
  -3   5 -48    0.91    0.85
  -3   9 -26    2.18    1.15
  -3   9 -25    0.65    1.21
  -3   9 -24   24.51    1.31
  -3   9 -23    2.53    1.07
  -2   1 -53    9.72    0.62
  -2   3 -51    0.60    0.65
  -1   4 -49   19.68    1.14
  -1   5 -47    0.95    1.10
  -1   6 -44    1.54    1.30
  -1   7 -40    7.22    1.43
  -1   8 -34  138.65    2.20
  -1   8 -33    3.88    1.37
  -1   8 -18    0.63    0.65
  -1   8 -17    0.03    0.72
   0   6 -42   87.64    1.77
   1   2 -49    0.92    1.08
   1   5 -43    0.21    1.22
   1   6 -39    1.38    1.20
   1   7 -33    2.11    1.55
   1   7 -32  301.75    2.81
   1   7 -31    1.05    1.15
   2   0 -48    4.10    0.83
   2   1 -48    0.51    1.04
   2   2 -47    6.48    1.21
   2   3 -45    1.34    1.06
   2   5 -40   31.27    1.70
   2   6 -35    0.41    1.39
   2   6 -34   36.89    1.47
   2   6 -33    1.86    1.17
   2   6 -20   19.00    0.78
   3   4 -39    1.19    1.41
   3   4 -38    1.22    1.14
   3   5 -33    5.21    1.14
   3   5 -32    2.37    1.07
   3   5 -22   -0.26    0.59
   4   1 -40    1.39    1.21
   4   2 -39   -0.11    1.22
   4   3 -36    3.23    1.25
   4   3 -35  124.63    1.84
   5   0 -32    0.59    0.83
  -7   7 -40    5.22    0.58
  -6   6 -45    0.87    0.52
  -6   8 -37    0.91    0.81
  -5   5 -48    4.65    0.58
  -4   6 -46   16.15    0.87
  -3   3 -52    0.01    0.57
  -3   6 -46    2.14    0.80
  -3   7 -43    0.49    1.05
  -3   8 -38    0.54    1.18
  -3   9 -30    3.82    1.22
  -3   9 -29    1.96    1.23
  -3   9 -28    1.13    1.17
  -3   9 -27    9.23    1.03
  -2   5 -48    3.86    0.84
  -2   7 -42    2.28    1.02
  -2   8 -37   -0.56    1.26
  -1   2 -52   31.03    0.95
  -1   3 -51    6.53    0.89
  -1   7 -41    0.81    1.38
  -1   8 -35    0.23    1.42
  -1   8 -16  224.64    1.78
   0  -1 -52    4.33    0.63
   0   2 -51    2.73    0.90
   0   4 -48   28.06    1.20
   0   5 -46   10.95    1.27
   0   6 -43   10.28    1.39
   0   8 -30   12.65    1.48
   0   8 -29    0.28    1.31
   0   8 -28   17.60    1.28
   0   8 -27   95.65    1.78
   0   8 -26   -1.19    1.07
   0   8 -25    6.24    1.07
   0   8 -24   14.31    1.14
   1   3 -48   -0.67    0.95
   1   5 -44   18.59    1.48
   1   7 -35  229.60    2.73
   1   7 -34    0.36    1.22
   1   7 -19    3.26    0.64
   2   3 -46    1.63    1.23
   3   0 -46   -0.46    1.04
   3   4 -40    1.66    1.36
   3   5 -36  126.49    2.13
   3   5 -35    3.40    1.17
   4   0 -42    6.13    1.12
   4   1 -41   57.62    1.56
   4   3 -37    0.97    1.29
   4   4 -32   91.69    1.73
   4   4 -31    4.13    1.17
   4   4 -30   22.59    1.08
   4   4 -29   27.96    1.07
   4   4 -27    3.44    0.77
   4   4 -26   97.47    1.38
   4   4 -25    0.21    0.81
   4   4 -24    0.70    0.75
   5   0 -34  432.65    2.69
   5   1 -32    0.85    0.90
   5   1 -30    0.83    0.81
   5   1 -29    4.04    0.68
   5   1 -27    9.20    0.65
  -6   8 -38    0.16    0.71
  -5   6 -46    0.16    0.54
  -5   7 -43    0.98    0.71
  -4   5 -49    8.55    0.67
  -4   8 -39   -1.05    0.82
  -3   4 -51    0.05    0.61
  -3   8 -39    3.96    1.14
  -2   2 -53   10.79    0.64
  -2   5 -49    0.02    0.85
  -2   9 -29   83.15    1.82
  -2   9 -28    1.04    1.37
  -2   9 -27   -0.12    1.33
  -2   9 -24    4.58    1.24
  -1   1 -53    4.09    0.62
  -1   4 -50    1.02    0.90
  -1   7 -42    1.11    1.33
   0   4 -49    1.70    1.04
   0   5 -47   -0.48    1.14
   0   6 -44    4.29    1.33
   0   8 -33    8.97    1.53
   0   8 -31   -1.62    1.14
   0   8 -20    3.85    0.95
   1   1 -51    1.08    0.85
   1   3 -49   -0.08    1.08
   1   5 -45   26.25    1.54
   1   7 -36    3.06    1.34
   2   1 -49   13.95    1.11
   2   2 -48    3.00    1.15
   2   3 -47    0.78    1.15
   2   4 -45    5.36    1.39
   2   6 -38   -1.33    1.45
   2   6 -37   -0.72    1.21
   3   1 -46    1.11    1.13
   3   2 -45    3.15    1.12
   3   4 -41    1.62    1.16
   4   1 -42    0.10    1.16
   4   2 -41    7.28    1.31
   4   3 -39    4.71    1.27
   4   4 -33    1.80    1.01
   5   0 -36    0.42    0.99
   5   1 -35    6.94    1.07
   5   1 -34   51.04    1.36
   5   2 -31   28.79    1.14
   5   2 -27    0.23    0.78
  -4   7 -44    0.45    0.81
  -4   8 -40    4.44    0.95
  -4   9 -33    1.54    1.09
  -3   6 -47    0.27    0.69
  -3   7 -44   -1.02    0.80
  -3   8 -40    1.74    1.10
  -3   9 -33   33.73    1.49
  -2   4 -51    1.27    0.72
  -2   7 -44    3.99    1.06
  -2   8 -39    0.73    1.04
  -2   9 -31    0.69    1.34
  -2   9 -30    2.30    1.28
  -2   9 -21    2.40    0.95
  -1   3 -52    8.52    0.77
  -1   6 -46   92.24    1.53
  -1   7 -43   40.43    1.50
  -1   8 -38    0.03    1.35
   0   3 -51   17.78    1.00
   0   6 -45   73.87    1.68
   0   8 -35    8.69    1.50
   0   8 -34   31.91    1.47
   0   8 -19   10.20    0.78
   0   8 -18   26.98    0.99
   1   4 -48    1.44    1.18
   1   5 -46   -0.28    1.22
   1   7 -37   -0.37    1.25
   2   0 -50    0.20    0.85
   2   2 -49   -0.81    1.04
   2   6 -39    0.48    1.39
   2   7 -32    6.79    1.44
   2   7 -31    8.32    1.49
   2   7 -30   -0.15    1.13
   2   7 -29    5.11    1.12
   2   7 -28   31.48    1.29
   2   7 -27    1.87    0.98
   2   7 -25   45.62    1.27
   2   7 -24    7.29    1.09
   3   1 -47    3.42    1.14
   3   2 -46    1.09    1.24
   3   4 -42   45.92    1.57
   3   5 -39    4.38    1.50
   3   5 -38    0.26    1.20
   3   6 -32   -1.35    1.36
   3   6 -31    4.65    1.29
   3   6 -30   27.88    1.26
   3   6 -28    0.74    0.96
   3   6 -27   79.89    1.49
   3   6 -26    2.01    0.90
   3   6 -25    9.12    1.07
   3   6 -24  223.04    2.12
   4   2 -42   -0.20    1.29
   4   3 -40    1.86    1.34
   4   4 -35    5.68    1.11
   5   1 -36    3.92    1.12
   5   2 -34   62.05    1.48
   5   2 -33   -0.42    1.08
   5   2 -32    7.58    0.90
   5   2 -26    1.89    0.62
  -6   7 -43    0.55    0.51
  -6   8 -39    0.73    0.65
  -5   6 -47    7.95    0.57
  -5   7 -44    9.55    0.69
  -5   8 -40    2.14    0.77
  -4   7 -45    0.80    0.72
  -4   9 -35    1.00    1.05
  -3   6 -48   19.59    0.84
  -3   7 -45   20.19    0.97
  -3   8 -41    0.33    1.04
  -3   9 -35   -0.81    1.15
  -2   5 -50    4.50    0.78
  -2   8 -40   -1.59    0.98
  -1   5 -49   70.98    1.26
  -1   8 -39    1.07    1.36
  -1   9 -29    3.79    1.41
  -1   9 -28    6.06    1.40
  -1   9 -27   -0.15    1.34
  -1   9 -26    3.64    1.40
  -1   9 -25   10.12    1.41
  -1   9 -24    0.63    1.27
   0   1 -53    0.13    0.66
   0   4 -50    2.37    0.92
   0   5 -48    6.29    0.99
   0   7 -42    1.52    1.38
   0   8 -17    7.56    0.82
   1   0 -52    3.10    0.74
   1   1 -52    0.43    0.78
   1   2 -51    0.38    0.86
   1   3 -50   -0.99    0.94
   1   6 -43    0.57    1.15
   1   8 -30   -0.07    1.44
   1   8 -29  104.03    2.04
   1   8 -28    2.53    1.34
   1   8 -27   -0.55    1.27
   1   8 -26  133.48    2.05
   1   8 -25    0.06    1.24
   1   8 -24    1.71    1.19
   2   1 -50    0.39    0.94
   2   3 -48    4.55    1.10
   2   4 -46   17.09    1.21
   2   5 -44    3.89    1.43
   2   7 -21   16.22    1.01
   3   0 -48   34.53    1.20
   3   2 -47    7.24    1.18
   3   3 -45    4.57    1.03
   3   5 -40   10.63    1.54
   3   6 -34   -0.95    1.40
   3   6 -33   10.90    1.26
   4   3 -41   71.74    1.82
   4   4 -38   27.06    1.58
   4   4 -37    0.15    1.13
   4   5 -30    0.97    1.18
   4   5 -29  114.72    1.82
   4   5 -28   -0.62    1.07
   4   5 -27    0.34    1.05
   5   0 -38    2.28    1.06
   5   1 -38    5.47    1.19
   5   1 -37  131.40    1.74
   5   2 -35   27.43    1.13
   5   3 -31    6.31    1.07
   5   3 -30    1.20    1.01
   5   3 -29   10.56    1.04
  -5   8 -41    3.56    0.72
  -4   6 -48   -0.23    0.56
  -4   9 -36    0.48    0.98
  -3   9 -36   13.96    1.23
  -2   3 -53   52.72    0.85
  -2   4 -52    2.59    0.65
  -2   6 -48   -0.43    0.82
  -2   7 -45   -0.59    0.82
  -2   8 -41    1.43    1.11
  -2   9 -35   13.57    1.36
  -1   8 -40   25.41    1.45
  -1   9 -32    2.62    1.49
  -1   9 -30    1.50    1.15
  -1   9 -22   23.57    1.12
  -1   9 -21    5.81    1.11
   0   2 -53    2.14    0.67
   0   6 -46    9.50    1.04
   0   7 -43    6.58    1.35
   0   8 -16    1.20    0.70
   1   4 -49   -0.39    0.86
   1   5 -47   16.02    1.12
   1   6 -44   78.24    1.64
   1   8 -33   -0.67    1.51
   1   8 -32  542.63    3.64
   1   8 -31    0.29    1.20
   1   8 -23   46.76    1.28
   1   8 -21    6.68    1.02
   2   2 -50   -0.62    0.96
   2   3 -49   23.82    1.20
   2   4 -47    4.27    1.18
   2   5 -45   -1.51    1.33
   2   7 -36    4.39    1.57
   2   7 -35    2.50    1.29
   3   1 -48   27.76    1.21
   3   3 -46   -0.33    1.16
   3   4 -44    2.86    1.37
   3   5 -41    0.63    1.26
   3   6 -36    8.16    1.31
   3   6 -21   11.63    0.77
   3   6 -20    9.50    0.85
   4   5 -35   29.04    1.56
   4   5 -34   -0.52    1.38
   4   5 -33    1.47    1.11
   4   5 -32  129.03    1.91
   4   5 -23  338.09    2.36
   5   1 -39    4.29    1.16
   5   3 -34    2.92    1.22
   5   3 -33    1.35    1.14
   5   3 -32    2.22    0.93
   5   3 -25   51.97    1.11
  -5   7 -45    2.24    0.54
  -4   8 -42    0.56    0.80
  -4   9 -37   10.18    1.00
  -3   5 -51    5.45    0.56
  -3   8 -42   24.79    0.98
  -2   8 -42    6.71    1.11
  -2   9 -36    4.93    1.29
  -1   2 -54    0.33    0.50
  -1   4 -52   23.32    0.84
  -1   5 -50    1.16    0.70
  -1   6 -48    2.15    0.92
  -1   7 -45    1.05    1.06
  -1   8 -41    0.86    1.22
  -1   9 -20    2.97    0.81
  -1   9 -19   19.54    1.07
   0   4 -51    0.72    0.83
   0   5 -49    7.23    0.91
   0   6 -47   -0.24    1.06
   0   7 -44    0.99    1.20
   1   2 -52    2.84    0.78
   1   3 -51    4.23    0.80
   1   4 -50   16.09    1.05
   1   6 -45    3.35    1.07
   1   7 -41   76.53    1.74
   1   8 -35   14.03    1.56
   1   8 -34    1.83    1.33
   1   8 -20  471.83    2.82
   2   1 -51    0.67    0.85
   2   4 -48    1.32    1.12
   2   6 -42   -0.07    1.20
   2   7 -38    2.18    1.49
   2   7 -37    5.22    1.27
   2   7 -18    3.49    0.78
   3   1 -49    1.64    0.94
   3   2 -48    2.49    1.08
   3   4 -45    1.09    1.28
   3   6 -38    1.59    1.44
   3   6 -19   15.06    0.74
   4   4 -41   16.30    1.46
   4   4 -40    1.32    1.15
   4   5 -37   -0.12    1.40
   4   5 -22   -0.02    0.65
   4   5 -21   11.92    0.85
   5   1 -40   -1.41    1.13
   5   3 -36    1.40    1.28
   5   3 -35   16.51    1.16
  -5   8 -42   -0.10    0.61
  -4   8 -43    0.35    0.72
  -4   9 -38    9.52    0.93
  -3   6 -49    0.26    0.52
  -3   8 -43    0.20    0.85
  -3   9 -38   -1.05    1.04
  -2   5 -51    2.85    0.58
  -2   6 -49    4.85    0.68
  -2   8 -43    0.66    0.96
  -2   9 -37    0.87    1.18
  -1   7 -46   45.75    1.25
  -1   8 -42    0.15    1.18
  -1   9 -36    1.99    1.33
  -1   9 -18   55.27    1.23
   0   3 -53   -0.46    0.64
   0   5 -50    1.51    0.88
   0   8 -40   -0.92    1.31
   0   9 -32    0.65    1.38
   0   9 -31    0.43    1.49
   0   9 -29   11.94    1.29
   0   9 -27    5.36    1.23
   0   9 -26   -1.35    1.12
   0   9 -23    1.69    1.20
   1   6 -46    0.52    1.16
   1   7 -42   -1.25    1.15
   1   8 -36    0.62    1.32
   1   8 -19    2.99    0.77
   2   2 -51    0.40    0.89
   2   3 -50    0.12    1.00
   2   6 -43  111.52    1.88
   2   7 -17    2.99    0.74
   3   4 -46    0.22    1.25
   3   5 -43    0.50    1.16
   3   6 -39    6.35    1.25
   3   7 -32   -0.75    1.42
   3   7 -31   -0.19    1.44
   3   7 -30   25.83    1.53
   3   7 -29    4.82    1.15
   3   7 -28   14.60    1.18
   3   7 -26    1.02    1.17
   3   7 -25    4.25    1.10
   4   1 -46   -0.14    1.07
   4   2 -45    2.48    1.01
   4   5 -38   16.76    1.54
   5   2 -40  131.89    1.98
   5   3 -38    2.36    1.33
   5   3 -37   78.38    1.66
   5   4 -33    5.79    1.28
   5   4 -30    0.61    0.90
   5   4 -29    1.10    0.87
   5   4 -28  369.46    2.59
   5   4 -26   23.90    1.11
  -4   7 -47   -0.36    0.54
  -3   7 -47    0.82    0.65
  -3   9 -39    3.31    1.01
  -2   7 -47   28.79    0.98
  -1   5 -51    0.88    0.62
  -1   6 -49   23.61    0.88
  -1   8 -43   13.02    1.15
  -1   9 -37    2.82    1.34
   0   2 -54    1.59    0.54
   0   4 -52    0.71    0.69
   0   6 -48   25.67    0.98
   0   7 -45  109.13    1.63
   0   8 -41    0.37    1.25
   0   9 -33   56.10    1.57
   0   9 -22    0.79    0.91
   0   9 -21    3.52    1.14
   1   3 -52    0.56    0.76
   1   4 -51   -0.41    0.85
   1   5 -49    4.94    0.87
   1   6 -47    0.82    1.08
   1   8 -17   37.87    1.06
   2   1 -52   12.78    0.84
   2   4 -49    0.41    0.85
   2   5 -47    1.89    1.00
   2   6 -44    0.97    1.13
   2   8 -33   -1.44    1.56
   2   8 -31  128.43    2.09
   2   8 -30   -0.02    1.20
   2   8 -28   21.65    1.31
   2   8 -27    0.27    1.08
   2   8 -25   65.72    1.49
   2   8 -24    3.99    1.16
   3   1 -50   -0.23    0.86
   3   2 -49    0.69    0.85
   3   3 -48    0.69    0.94
   3   5 -44   -1.28    1.15
   3   7 -34    3.59    1.28
   3   7 -33   18.21    1.38
   3   7 -24   66.01    1.37
   3   7 -23    5.11    1.01
   4   1 -47    8.56    1.08
   4   2 -46    1.81    1.12
   4   3 -45    1.13    1.28
   4   5 -40   -0.67    1.45
   4   5 -39    5.99    1.26
   4   6 -34   -0.09    1.41
   4   6 -33    4.21    1.49
   4   6 -32   78.37    1.73
   4   6 -31    0.11    1.12
   4   6 -30    2.19    1.09
   4   6 -29  144.04    1.96
   4   6 -26    8.58    0.97
   4   6 -25    3.17    1.06
   5   1 -42    5.12    1.11
   5   2 -41   14.25    1.29
   5   3 -39    1.24    1.09
   5   4 -35    3.80    1.09
   5   4 -34   41.24    1.37
   5   4 -25    2.12    0.74
   5   4 -24    3.05    0.71
   5   4 -23   55.82    1.15
  -5   8 -43   -0.02    0.51
  -4   8 -44    0.53    0.62
  -4   9 -39    0.04    0.80
  -3   9 -40    2.44    0.90
  -3  10 -31   -0.08    1.12
  -3  10 -30   42.48    1.36
  -2   6 -50   11.05    0.70
  -2   9 -39    1.09    1.09
  -2  10 -28    4.90    1.26
  -2  10 -27    2.25    1.24
  -2  10 -26   33.00    1.45
  -2  10 -25    2.03    1.21
  -2  10 -24   -0.89    1.14
  -1   4 -53    1.48    0.51
  -1   9 -38   -0.66    1.21
   0   5 -51    6.26    0.83
   0   6 -49    2.73    0.86
   0   7 -46    0.13    1.01
   0   8 -42  103.39    1.79
   0   9 -20    3.61    0.84
   0   9 -19   -0.64    0.94
   1   7 -44   -0.68    1.03
   1   8 -40    0.73    1.37
   1   8 -39    2.15    1.23
   1   8 -16    5.15    0.78
   1   9 -28   11.44    1.53
   2   2 -52   45.32    1.10
   2   3 -51    1.29    0.87
   2   4 -50    5.15    0.97
   2   6 -45    2.14    1.04
   2   7 -42   -0.91    1.32
   2   7 -41    0.14    1.18
   2   8 -35    6.57    1.60
   2   8 -34  313.97    2.93
   2   8 -23    3.19    0.96
   2   8 -22  279.48    2.35
   2   8 -21    2.64    1.00
   3   2 -50    1.23    0.91
   3   3 -49    2.99    1.04
   3   4 -47   -0.47    0.96
   3   5 -45  110.03    1.81
   3   6 -42   15.98    1.55
   3   7 -36   86.29    1.86
   3   7 -22    1.00    0.78
   3   7 -21  446.05    2.76
   4   2 -47   45.53    1.43
   4   3 -46    0.27    1.16
   4   6 -24    4.14    0.86
   4   6 -23   37.96    1.10
   5   3 -40    3.08    1.10
   5   4 -38   12.51    1.45
   5   4 -37    2.06    1.10
   5   4 -22  212.04    1.82
   6   1 -31    0.57    0.71
   6   1 -28    1.68    0.73
   6   1 -27    3.93    0.73
   6   1 -26   35.85    0.94
   6   2 -30   91.04    1.48
  -4   9 -40   19.15    0.88
  -3   8 -45   10.75    0.76
  -3  10 -33    2.79    1.09
  -3  10 -32   -2.50    1.05
  -2   7 -48   -0.33    0.65
  -2   8 -45    0.95    0.81
  -2   9 -40   -0.39    1.00
  -2  10 -32   33.43    1.39
  -1   5 -52   -0.37    0.52
  -1   6 -50    0.55    0.61
  -1   8 -44    0.14    0.81
  -1   9 -39    1.31    1.15
   0   3 -54    1.61    0.52
   0   4 -53   -0.40    0.58
   0   7 -47    4.48    0.98
   0   8 -43    6.73    1.15
   0   9 -37   12.95    1.39
   0   9 -18  117.97    1.61
   1   1 -54    0.55    0.51
   1   3 -53    3.31    0.69
   1   4 -52    3.51    0.74
   1   5 -50    2.43    0.77
   1   6 -48   -0.61    0.87
   1   8 -41   10.96    1.42
   1   8 -15   -0.23    0.68
   1   9 -33   -0.12    1.43
   1   9 -31    1.60    1.21
   1   9 -29  273.27    2.75
   1   9 -24    1.49    1.28
   2   6 -46  111.85    1.72
   2   7 -43   31.22    1.49
   2   8 -36   -0.91    1.32
   2   8 -20   12.44    1.06
   3   1 -51   19.40    0.90
   3   4 -48  110.28    1.73
   3   5 -46    6.49    1.24
   3   7 -38    1.28    1.22
   3   7 -20    5.53    0.76
   3   7 -19    0.99    0.81
   4   1 -48   19.01    1.11
   4   4 -45    2.67    1.27
   4   6 -38   24.69    1.74
   4   6 -37    4.55    1.29
   4   6 -22    6.91    0.82
   4   6 -21    1.99    0.89
   5   5 -35    8.87    1.46
   5   5 -33   -0.17    1.09
   5   5 -32    0.53    1.06
   5   5 -31   27.26    1.25
   5   5 -30    5.48    1.03
   5   5 -29   34.92    1.24
   5   5 -28    1.49    0.94
   5   5 -27    1.21    0.89
   6   1 -35   12.73    0.98
   6   2 -35    1.08    1.14
   6   2 -34    3.55    1.17
   6   2 -33    7.45    0.93
   6   2 -32    4.16    0.89
   6   2 -29    0.33    0.73
   6   2 -28    9.34    0.78
   6   2 -27   38.36    1.09
   6   2 -26   -1.07    0.75
  -4   8 -45    2.02    0.52
  -4   9 -41    0.54    0.73
  -3   9 -41    0.00    0.81
  -3  10 -34    0.54    1.00
  -2   6 -51    1.20    0.51
  -2   9 -41   18.78    1.04
  -1   7 -48    0.22    0.65
  -1   8 -45    2.97    0.93
  -1   9 -40   -0.72    1.10
  -1  10 -29    6.65    1.35
  -1  10 -27    1.25    1.35
  -1  10 -26   -0.09    1.29
  -1  10 -25    4.53    1.38
   0   6 -50   -0.28    0.75
   0   8 -44   -0.56    1.05
   0   9 -39   22.02    1.36
   0   9 -38    0.56    1.03
   1   2 -54    1.57    0.53
   1   5 -51    2.58    0.81
   1   6 -49    2.27    0.92
   1   7 -46    8.30    1.15
   1   9 -34    0.33    1.25
   1   9 -22    2.66    0.94
   1   9 -21    0.61    1.05
   2   1 -53    3.71    0.62
   2   2 -53   10.97    0.74
   2   3 -52    2.58    0.78
   2   4 -51    0.73    0.84
   2   5 -49  106.63    1.50
   2   6 -47    1.95    1.16
   2   8 -39   -0.31    1.47
   2   8 -19    2.58    0.76
   3   3 -50    0.15    0.91
   3   4 -49    1.70    1.00
   3   5 -47    1.03    1.15
   3   6 -44    2.44    1.31
   3   7 -18   58.83    1.21
   3   8 -29    0.37    1.40
   3   8 -28   16.23    1.45
   4   2 -48    3.78    1.00
   4   3 -47   86.00    1.53
   4   5 -43    7.96    1.24
   4   6 -39    3.47    1.26
   4   6 -20  371.23    2.38
   4   7 -30    2.44    1.38
   5   1 -45    0.04    1.03
   5   2 -44    2.05    1.12
   5   4 -40   51.57    1.51
   5   5 -24   -0.23    0.74
   5   5 -23   23.98    1.07
   6   2 -37    5.00    1.27
   6   2 -36   73.80    1.49
   6   2 -25    6.13    0.65
   6   3 -34   -0.23    1.14
   6   3 -33   32.20    1.38
   6   3 -32   -1.18    1.11
   6   3 -30   14.48    1.11
   6   3 -29    2.14    1.01
  -3   8 -46    0.00    0.56
  -3   9 -42    5.35    0.79
  -2   7 -49   -0.02    0.55
  -2   8 -46    4.83    0.72
  -2  10 -35   13.83    1.19
  -1   6 -51    1.00    0.52
  -1   9 -41    1.45    1.02
  -1  10 -33    3.21    1.31
  -1  10 -22   53.11    1.41
  -1  10 -21    7.01    1.06
   0   7 -48    3.42    0.85
   0   9 -40    6.55    1.19
   0   9 -16    3.77    0.77
   1   3 -54    0.80    0.53
   1   8 -43    0.87    1.21
   1   9 -37    0.44    1.44
   2   5 -50    0.13    0.88
   2   8 -40   65.27    1.86
   2   8 -17   -0.09    0.77
   3   6 -45   10.18    1.29
   3   7 -41    0.88    1.19
   3   7 -17    3.81    0.80
   3   8 -33    4.14    1.32
   3   8 -32    0.56    1.27
   3   8 -31   -0.76    1.24
   3   8 -27   57.08    1.59
   3   8 -26    0.82    1.05
   3   8 -24   21.92    1.35
   4   1 -49    5.12    0.88
   4   3 -48   -0.60    1.04
   4   5 -44    0.12    1.11
   4   6 -18    2.10    0.74
   4   7 -35    2.86    1.47
   4   7 -32  354.61    3.05
   4   7 -28    1.75    1.11
   4   7 -26   76.18    1.56
   4   7 -25   -0.05    1.18
   5   1 -46    0.11    1.07
   5   2 -45   -1.02    1.13
   5   3 -44    1.20    1.27
   5   5 -39   -1.58    1.46
   5   5 -38    4.24    1.23
   6   1 -40    0.88    1.04
   6   1 -39   18.22    1.20
   6   2 -39   78.60    1.70
   6   2 -38    2.19    1.19
   6   3 -36    7.28    1.30
   6   3 -35    2.44    1.02
   6   3 -26    5.21    0.75
  -4   9 -42   -0.27    0.54
  -3  10 -37   -0.26    0.92
  -3  10 -36   14.51    0.96
  -2  10 -36    1.92    1.04
  -1   9 -42    0.91    0.94
  -1  10 -35    0.99    1.21
  -1  10 -34    4.82    1.07
   0   8 -45    1.49    0.79
   0   9 -15   89.12    1.29
   0  10 -30  124.88    2.16
   0  10 -29    0.88    1.36
   0  10 -28    0.33    1.41
   0  10 -26    2.53    1.46
   0  10 -25    3.95    1.42
   0  10 -24   24.38    1.46
   1   5 -52   -0.67    0.65
   1   7 -47   47.86    1.19
   1   9 -38   -0.57    1.34
   1   9 -18   17.06    1.04
   2   3 -53    4.63    0.68
   2   4 -52    8.10    0.82
   2   7 -45    1.01    0.97
   2   8 -41    2.29    1.18
   2   9 -33    2.76    1.56
   2   9 -32   -0.05    1.52
   2   9 -31  307.77    2.93
   2   9 -30    4.79    1.32
   2   9 -28  113.46    1.98
   2   9 -27    5.25    1.19
   2   9 -25  147.18    2.19
   2   9 -24   44.91    1.56
   3   1 -52    6.88    0.70
   3   2 -52    1.04    0.70
   3   3 -51   34.89    0.98
   3   4 -50    0.32    0.91
   3   5 -48    1.36    0.89
   3   6 -46    4.31    1.21
   3   7 -16   26.55    0.94
   3   8 -35    8.03    1.43
   3   8 -22   -0.44    1.07
   4   4 -47    7.55    0.97
   4   5 -45    1.40    1.06
   4   6 -42    2.65    1.41
   4   7 -37    3.00    1.50
   4   7 -36    1.22    1.24
   4   7 -24    6.47    0.99
   5   2 -46   48.22    1.41
   5   6 -35    2.82    1.46
   5   6 -34    4.74    1.56
   5   6 -33    4.83    1.23
   5   6 -32   -0.81    1.15
   5   6 -31    1.99    1.16
   5   6 -30    3.13    1.14
   5   6 -29   -0.59    1.06
   5   6 -28    7.77    1.10
   5   6 -27   -1.13    1.16
   6   4 -33  117.32    1.97
   6   4 -32    3.67    1.22
   6   4 -30  104.96    1.68
   6   4 -29    1.68    1.09
   6   4 -28   26.10    1.28
  -2   8 -47    4.65    0.62
  -2   9 -43    0.17    0.67
  -2  10 -37    1.13    0.99
  -1   7 -50   -0.46    0.56
  -1   9 -43   32.38    1.14
  -1  10 -36   -0.24    1.08
   0   5 -53    2.09    0.52
   0   7 -49    1.72    0.67
   0   8 -46    0.18    0.85
   0   9 -42   53.56    1.37
   0   9 -14   -0.57    0.69
   0  10 -34    9.77    1.45
   0  10 -23    7.43    1.05
   1   7 -48   -0.73    0.86
   1   9 -39   11.63    1.20
   2   2 -54   -0.22    0.53
   2   7 -46    0.24    0.91
   2   8 -42   -0.33    1.09
   2   9 -34    6.19    1.31
   2   9 -23    4.11    1.05
   2   9 -22    1.46    1.20
   3   5 -49    4.63    0.98
   3   6 -47    1.01    1.06
   3   8 -20    4.31    0.99
   4   2 -50   23.79    1.04
   4   3 -49    3.84    0.82
   4   4 -48    6.29    1.09
   4   5 -46    1.32    1.13
   4   6 -43    0.44    1.14
   4   7 -21   15.55    1.10
   5   2 -47    4.84    0.99
   5   3 -46    4.54    1.15
   5   4 -44    0.83    1.26
   5   5 -19   48.06    1.09
   5   6 -37    1.52    1.52
   5   6 -36   -0.86    1.23
   5   6 -25   46.10    1.28
   6   2 -41    7.90    1.19
   6   3 -40    1.33    1.31
   6   3 -39  135.90    1.91
   6   4 -37    6.08    1.42
   6   4 -36  261.15    2.55
   6   4 -35    7.73    1.18
   6   4 -26    1.30    0.81
  -3   9 -44    1.46    0.62
  -3  10 -38    0.64    0.75
  -2   9 -44    7.00    0.73
  -2  10 -38    5.99    0.85
  -1  10 -38    7.53    1.08
   0   6 -52    1.57    0.56
   0   9 -43    6.35    0.99
   0  10 -35    0.35    1.09
   1   4 -54    4.00    0.54
   1   6 -51    0.41    0.71
   1   9 -41  106.17    1.78
   1   9 -16    1.17    0.81
   1  10 -30    4.47    1.53
   1  10 -29    6.62    1.63
   1  10 -28   -0.42    1.58
   1  10 -27    0.18    1.50
   2   4 -53    4.48    0.66
   2   7 -47    6.73    1.03
   2   8 -43    7.81    1.09
   2   9 -37   18.10    1.56
   2   9 -21    3.94    0.95
   3   3 -52    0.29    0.75
   3   4 -51    1.81    0.71
   3   7 -44    2.02    1.06
   3   8 -40    9.32    1.48
   3   8 -19    4.97    1.01
   4   3 -50    9.05    0.96
   4   4 -49    0.27    0.98
   4   5 -47   76.00    1.58
   4   6 -44  102.95    1.77
   4   7 -40    1.68    1.26
   5   6 -38   -0.83    1.21
   5   6 -23    7.39    0.91
   5   6 -22  173.87    1.93
   6   4 -39    0.33    1.43
   6   4 -38    1.93    1.15
   6   4 -24   41.17    1.06
   6   4 -23    2.35    0.87
   6   5 -33   16.01    1.47
   6   5 -31    1.52    1.29
   6   5 -30    3.57    1.27
   6   5 -29   -1.08    1.21
  -3  10 -39    5.06    0.74
  -1   8 -48    0.41    0.61
  -1   9 -44   16.69    0.83
  -1  10 -39    0.77    0.98
   0  10 -37    5.64    1.25
   0  10 -19   24.25    1.16
   1   5 -53    3.01    0.52
   1   8 -46    0.81    0.80
   1   9 -42   12.41    1.18
   1  10 -34    4.41    1.38
   1  10 -25    5.25    1.16
   1  10 -23   49.01    1.56
   2   5 -52   10.73    0.74
   2   6 -50    0.71    0.66
   2   7 -48    0.33    0.91
   2   8 -44    4.14    0.98
   2   8 -14    0.70    0.58
   2   9 -39    1.18    1.38
   2   9 -38    0.66    1.20
   2   9 -20    1.62    0.89
   3   5 -50   -0.48    0.73
   3   7 -45   83.60    1.56
   3   8 -41    1.46    1.31
   3   8 -18  229.68    2.07
   3   9 -31    5.57    1.63
   3   9 -30  104.13    2.25
   3   9 -29    1.18    1.61
   3   9 -28   15.46    1.61
   3   9 -27    9.01    1.46
   4   2 -51    6.68    0.82
   4   7 -42    2.12    1.36
   4   7 -41   78.17    1.75
   4   7 -19    0.31    0.72
   4   7 -18    0.59    0.81
   4   8 -35    2.29    1.49
   4   8 -34    4.46    1.52
   4   8 -32   41.04    1.63
   4   8 -30    0.93    1.26
   4   8 -29  146.83    2.16
   4   8 -26   10.36    1.38
   4   8 -25   -0.52    1.28
   5   2 -48    1.17    0.95
   5   3 -47    9.76    0.94
   5   5 -44    2.51    1.29
   5   7 -33    5.05    1.57
   5   7 -32    6.86    1.57
   5   7 -31  175.68    2.47
   6   5 -37    0.76    1.37
   6   5 -36   23.67    1.59
   6   5 -35   -1.05    1.15
   6   5 -34   -0.60    1.14
   6   5 -27   95.24    1.60
   6   5 -26    2.93    1.12
  -2   9 -45   -0.55    0.55
  -2  10 -40    1.01    0.76
  -1   9 -45    0.86    0.73
  -1  10 -40    5.29    0.96
   0   8 -48    6.55    0.71
   0   9 -44    0.17    0.73
   0  10 -39    3.93    1.10
   0  10 -38    2.76    0.93
   0  10 -18  165.74    1.84
   1   6 -52   -0.31    0.58
   1  10 -35    8.48    1.18
   1  10 -22    1.87    1.19
   1  10 -21   -1.24    1.10
   2   8 -45   -0.66    1.04
   2   9 -40   15.18    1.36
   2   9 -18   -0.77    0.97
   3   3 -53    0.45    0.60
   3   4 -52    0.43    0.63
   3   5 -51    7.85    0.81
   3   7 -46    6.60    1.00
   3   8 -42   63.68    1.54
   3   8 -17    4.85    0.89
   3   9 -33  130.40    2.21
   3   9 -25    0.73    1.10
   3   9 -24    5.47    1.33
   4   4 -50   63.67    1.28
   4   6 -46    2.95    1.01
   4   7 -43   -0.53    1.33
   4   7 -17   77.34    1.30
   4   8 -24   22.00    1.19
   4   8 -23   27.83    1.38
   5   4 -47    0.90    1.04
   5   5 -45   -0.86    1.18
   5   6 -42    1.96    1.43
   5   6 -41    1.08    1.17
   5   6 -20    0.04    0.74
   5   6 -19   22.94    1.03
   5   7 -36   -0.06    1.49
   5   7 -34   43.53    1.61
   5   7 -26    1.92    1.02
   5   7 -25    5.25    1.26
   6   3 -43    1.39    0.95
   6   4 -21   28.33    0.88
   6   5 -39    8.26    1.43
   6   5 -38    2.59    1.18
   6   5 -25    5.24    0.90
   6   5 -24   61.03    1.28
   7   2 -33    4.66    1.07
   7   2 -32  220.70    2.15
   7   2 -31    0.09    0.99
   7   2 -30    5.05    0.99
   7   2 -29   95.42    1.53
   7   2 -28    6.97    0.95
  -2  10 -41    7.64    0.75
  -2  11 -33    0.80    1.06
  -2  11 -32   16.70    1.11
  -1  10 -41   13.75    0.91
  -1  11 -31   22.46    1.25
  -1  11 -26    1.23    1.15
   0   7 -51    5.72    0.51
   0  10 -17   20.87    1.03
   1   9 -44    0.62    0.91
   1   9 -14    3.80    0.65
   1  10 -37   -0.37    1.19
   1  10 -20    3.60    1.12
   2   5 -53    0.09    0.57
   2   7 -49    2.05    0.79
   2   8 -46    8.27    1.02
   2   9 -17   -0.70    0.93
   2  10 -30    1.16    1.51
   2  10 -29   11.12    1.64
   2  10 -28  280.27    2.97
   2  10 -27   -0.55    1.52
   2  10 -26    9.00    1.48
   3   7 -47    0.23    0.99
   3   8 -43    5.42    1.07
   3   8 -16   19.65    0.97
   3   9 -37    7.31    1.45
   3   9 -23   -1.19    1.00
   4   2 -52    0.30    0.64
   4   5 -49    3.10    0.90
   4   6 -47   -0.31    1.02
   4   7 -44    3.87    1.27
   4   8 -39    2.30    1.46
   4   8 -38    6.61    1.26
   4   8 -22    3.23    0.97
   4   8 -21   14.96    1.22
   5   2 -49   10.36    0.91
   5   3 -49   85.67    1.40
   5   5 -46   16.84    1.23
   5   6 -18    1.35    0.82
   5   7 -24    0.09    0.95
   6   3 -44   -0.19    0.99
   6   4 -43    3.52    1.32
   6   5 -23    0.35    0.78
   6   5 -22    1.38    0.91
   6   6 -35   11.76    1.53
   6   6 -34    4.12    1.53
   6   6 -33    4.78    1.45
   6   6 -32    2.89    1.21
   6   6 -31   -0.84    1.16
   6   6 -30  199.01    2.32
   6   6 -29   25.25    1.49
   6   6 -28    0.80    1.31
   7   2 -38   72.94    1.57
   7   2 -37    3.25    1.17
   7   2 -36   11.28    1.00
   7   2 -27    0.63    0.71
   7   3 -36    1.99    1.17
   7   3 -35   45.34    1.50
   7   3 -34    9.61    1.21
   7   3 -33    5.96    0.99
   7   3 -32  161.66    1.92
   7   3 -31    3.66    0.93
   7   3 -30    2.27    0.95
   7   3 -28    3.93    1.05
  -3  10 -41    0.44    0.50
  -2  10 -42    3.16    0.63
  -2  11 -34    0.65    0.91
  -1   9 -46    5.45    0.62
  -1  11 -33    0.41    1.09
  -1  11 -32    6.51    1.14
   0   8 -49   -0.23    0.56
   0  10 -41   -0.86    0.92
   1   8 -48    0.86    0.65
   1   9 -13   11.41    0.80
   1  10 -39   -0.10    1.12
   1  10 -38   79.50    1.55
   1  10 -19    4.77    1.02
   2   9 -16    0.73    0.90
   2  10 -35    5.17    1.47
   2  10 -25   10.05    1.24
   3   3 -54    2.83    0.51
   3   4 -53    0.26    0.57
   3   6 -50   -0.23    0.67
   3   7 -48    5.67    0.93
   3   8 -44   -0.15    0.94
   3   9 -39   22.83    1.54
   3   9 -21    4.43    1.01
   4   3 -52   -0.76    0.66
   4   5 -50    0.45    0.82
   4   7 -16   -0.07    0.64
   5   4 -48    1.09    0.84
   5   5 -47   -0.08    1.04
   5   6 -44    1.32    1.20
   5   7 -40   42.58    1.72
   5   7 -22    0.49    0.90
   5   7 -21    1.60    1.07
   6   2 -46   -1.56    0.97
   6   3 -45   19.48    1.05
   6   4 -44    1.03    1.23
   6   5 -42   10.00    1.34
   6   5 -21   45.08    1.07
   6   6 -37    3.27    1.52
   6   6 -36    4.06    1.26
   6   6 -27    6.46    1.08
   6   6 -25    2.67    1.18
   7   2 -25    0.09    0.65
   7   2 -24   18.87    0.91
   7   3 -38   64.19    1.66
   7   3 -26   52.19    1.19
   7   3 -25    1.05    0.91
   7   4 -34    1.24    1.31
   7   4 -33    2.29    1.31
   7   4 -31    4.58    1.33
   7   4 -30   10.14    1.28
   7   4 -29    4.42    1.21
  -1  11 -35   15.00    1.07
  -1  11 -34    0.86    0.98
   0   9 -46    7.57    0.67
   0  11 -33   17.63    1.28
   0  11 -31    0.15    1.25
   0  11 -30    3.16    1.07
   0  11 -25    4.65    1.29
   0  11 -24    8.74    1.28
   1   9 -12    4.44    0.68
   1  10 -40   -0.08    1.06
   2   6 -52    2.28    0.54
   2   7 -50    1.66    0.63
   2   9 -43   18.72    1.06
   2   9 -15    3.47    0.88
   2  10 -37   20.55    1.45
   2  10 -36    5.46    1.19
   2  10 -22   87.89    1.77
   3   8 -45   26.01    1.07
   3   8 -14   34.42    1.01
   3   9 -40    5.19    1.14
   3   9 -19   28.33    1.29
   4   7 -46    2.65    1.07
   4   7 -15    0.84    0.64
   4   8 -42    0.42    1.27
   4   8 -41   18.32    1.27
   4   8 -19    1.18    0.83
   4   9 -33   -0.87    1.68
   4   9 -32   17.08    1.67
   4   9 -31    0.42    1.31
   4   9 -30   -1.07    1.28
   4   9 -29   84.44    1.89
   4   9 -28    6.06    1.58
   4   9 -27    2.81    1.51
   5   4 -49   13.83    1.00
   5   6 -45    2.73    1.14
   5   6 -16    2.13    0.76
   5   7 -20    0.92    0.84
   5   8 -34  102.87    2.21
   5   8 -33    5.82    1.53
   5   8 -30    3.46    1.29
   5   8 -29   -0.31    1.23
   5   8 -28   37.12    1.70
   5   8 -27    0.89    1.45
   6   3 -46    1.10    0.99
   6   5 -43    2.86    1.27
   6   5 -20    8.43    0.74
   6   6 -24   89.02    1.55
   6   6 -23   17.32    1.22
   7   3 -39    7.16    1.09
   7   4 -37    1.53    1.34
   7   4 -36    4.76    1.14
   7   4 -28   10.26    1.02
   7   4 -26  261.84    2.34
  -2  10 -43    0.39    0.52
  -2  11 -36    3.53    0.79
  -1  10 -43    2.02    0.66
  -1  11 -36    2.77    0.95
   0   9 -47    0.36    0.58
   0  11 -34    0.92    1.15
   0  11 -23   19.00    1.25
   1   9 -46    1.41    0.76
   1  10 -41    2.97    0.97
   1  10 -17   89.58    1.41
   2   8 -48    1.60    0.78
   2   9 -44    7.34    0.89
   2  10 -38    7.69    1.10
   2  10 -21    2.01    0.99
   3   5 -53    0.24    0.54
   3   6 -51   17.85    0.73
   3   7 -49    0.07    0.77
   3   8 -46    2.77    0.94
   3   9 -42   21.76    1.29
   3   9 -41    2.28    1.04
   3   9 -18   22.97    1.16
   3  10 -30   73.56    2.04
   3  10 -29    0.05    1.56
   3  10 -28    4.26    1.55
   4   3 -53    7.79    0.61
   4   4 -52    2.34    0.65
   4   6 -49    2.12    0.85
   4   7 -14   26.12    0.84
   4   8 -43    0.08    1.20
   4   9 -37    1.00    1.42
   4   9 -25    0.36    1.14
   4   9 -24   17.06    1.47
   5   6 -46   83.37    1.55
   5   7 -43   13.96    1.37
   5   8 -26   12.36    1.26
   6   3 -47    0.29    0.93
   6   4 -46   -0.77    1.04
   6   5 -44    0.48    1.21
   6   6 -41    2.94    1.42
   6   6 -40    2.42    1.23
   6   6 -22    3.31    0.88
   6   7 -35    0.32    1.51
   6   7 -34    1.99    1.59
   6   7 -31    1.44    1.26
   6   7 -30    0.06    1.44
   7   3 -23   65.30    1.17
   7   3 -22   10.25    0.88
   7   4 -38   10.03    1.23
   7   4 -25   -0.85    0.83
   7   5 -35    2.90    1.34
   7   5 -34   -1.01    1.35
   7   5 -33    2.48    1.31
   7   5 -32    6.84    1.33
   7   5 -30   -0.94    1.30
   7   5 -29  184.71    2.27
   7   5 -28    0.41    1.18
  -1  11 -37   50.22    1.16
   0  10 -43    8.67    0.79
   0  11 -36    1.55    1.05
   0  11 -21    9.46    1.11
   0  11 -20    0.84    1.06
   1   8 -50    3.27    0.55
   1  10 -42    0.85    0.87
   1  10 -16   11.19    0.85
   1  11 -33    5.10    1.32
   1  11 -32    0.45    1.29
   1  11 -27    8.41    1.22
   1  11 -26    4.44    1.42
   1  11 -24    0.61    1.28
   2   7 -51   -0.34    0.53
   2  10 -39    9.59    1.03
   2  10 -19    0.40    1.13
   3   8 -47   -0.96    0.83
   3   8 -13   21.78    0.79
   3   9 -43    2.71    1.05
   3   9 -17    3.27    0.97
   3  10 -34   -0.65    1.27
   3  10 -26   17.23    1.31
   3  10 -24   93.97    1.99
   4   8 -44   15.89    1.18
   4   9 -38    7.23    1.27
   4   9 -23   22.24    1.25
   4   9 -22   15.38    1.38
   5   3 -51    0.46    0.71
   5   4 -50    0.44    0.77
   5   5 -49   81.62    1.39
   5   6 -47    0.87    1.02
   5   7 -44    3.86    1.21
   5   7 -18    3.80    0.82
   5   8 -39    2.42    1.39
   5   8 -38    3.07    1.24
   5   8 -23   -0.26    1.03
   5   8 -22    8.35    1.23
   6   4 -47    3.17    0.97
   6   6 -42    4.80    1.31
   6   6 -21    0.42    0.83
   6   6 -20   -0.02    0.99
   6   7 -36   -0.47    1.30
   6   7 -26    2.06    1.13
   6   7 -25    0.80    1.32
   7   3 -42    7.61    1.19
   7   4 -23  102.33    1.46
   7   5 -37    1.47    1.32
   7   5 -36    0.47    1.12
   7   5 -27    6.54    1.01
  -1  10 -44    2.82    0.57
   0  10 -44    0.95    0.66
   0  11 -38   -0.38    0.90
   0  11 -37   18.48    1.06
   1   9 -47    1.63    0.58
   1  10 -43    1.88    0.84
   1  10 -15   50.29    1.20
   1  11 -35  113.91    1.84
   1  11 -34    8.80    1.08
   2   8 -49    3.62    0.63
   2   9 -13   46.21    1.00
   2  10 -41    3.32    1.06
   3   6 -52    0.56    0.53
   3   7 -50    0.54    0.61
   3   9 -44    5.45    1.00
   3   9 -16   13.53    1.01
   3  10 -36   48.19    1.52
   3  10 -23    3.81    1.16
   3  10 -22    1.73    1.33
   4   4 -53    1.06    0.54
   4   5 -52    0.00    0.61
   4   7 -48    0.29    0.85
   4   8 -45    4.11    1.05
   4   8 -16   28.72    1.00
   4   9 -40    1.76    1.27
   4   9 -21   -0.60    0.98
   5   4 -51    2.80    0.72
   5   7 -45    4.84    1.12
   5   7 -17   46.15    1.13
   5   8 -41    5.82    1.31
   5   8 -40   22.70    1.31
   5   8 -21    4.15    1.16
   6   7 -23    0.37    1.21
   7   3 -43    3.71    0.96
   7   4 -42   -1.32    1.22
   7   4 -22   21.04    0.92
   7   4 -21    1.23    0.84
   7   5 -25    6.53    0.96
   7   5 -24    2.33    1.08
   7   6 -34    3.03    1.44
   7   6 -33   10.97    1.56
   7   6 -32  380.82    3.20
   7   6 -31    3.33    1.46
   7   6 -30   35.24    1.60
  -1  11 -39    0.28    0.68
   0  11 -39   22.25    0.97
   1   9 -48    2.37    0.55
   1  10 -14  104.30    1.46
   1  11 -37    1.22    1.07
   1  11 -36    8.35    1.00
   2   8 -50    0.69    0.56
   2   9 -12   16.28    0.88
   2  10 -42    0.10    0.94
   2  10 -17    4.12    0.88
   2  11 -33   11.82    1.42
   2  11 -32   12.08    1.52
   2  11 -31   10.01    1.55
   2  11 -27   -0.68    1.53
   2  11 -26   23.01    1.59
   3   7 -51   17.96    0.72
   3   8 -48    4.40    0.67
   3  10 -21   14.89    1.35
   4   6 -51    0.31    0.68
   4   7 -49    0.66    0.76
   4   8 -46   -0.51    0.91
   4   8 -15    1.20    0.74
   4   9 -41   32.96    1.32
   4   9 -19    3.29    1.16
   5   3 -52    1.10    0.58
   5   5 -50    0.60    0.75
   5   6 -48    0.02    0.78
   5   7 -16    3.93    0.76
   5   8 -42    3.44    1.23
   5   9 -32    1.06    1.32
   5   9 -31   14.06    1.43
   5   9 -30    0.24    1.31
   5   9 -29    0.71    1.53
   5   9 -28   82.43    2.08
   6   3 -49    4.49    0.83
   6   4 -48   76.76    1.35
   6   5 -47    2.81    0.98
   6   6 -18   80.86    1.45
   6   7 -41    0.05    1.36
   6   7 -40   -0.38    1.18
   6   7 -22   -0.27    0.94
   6   8 -32   -0.36    1.47
   6   8 -31    2.16    1.54
   6   8 -30    3.44    1.50
   7   3 -44    5.22    0.87
   7   3 -19    8.61    0.78
   7   5 -23   87.10    1.46
   7   5 -22   13.34    1.05
   7   6 -36    3.64    1.24
   7   6 -35   31.52    1.47
   7   6 -29   -1.24    1.11
   7   6 -28    8.00    1.16
   7   6 -26   29.28    1.42
   8   2 -35    0.93    1.03
   8   2 -34   14.97    1.19
   8   2 -30    1.03    1.02
   8   3 -33    2.00    1.20
   8   3 -32    4.46    1.15
  -1  11 -40    2.86    0.63
   0  10 -45    1.41    0.53
   1  10 -13    4.80    0.84
   1  11 -38   13.15    1.04
   1  11 -19    1.47    1.06
   2   9 -47    2.05    0.63
   2  10 -43   -0.60    0.85
   2  11 -35   -2.69    1.23
   2  11 -34   40.60    1.39
   2  11 -24    2.39    1.40
   3   8 -49    2.54    0.69
   3   8 -11    4.75    0.63
   3   9 -45    1.74    0.76
   3   9 -14    3.24    0.91
   3  10 -40   -0.52    1.05
   3  10 -20    1.70    1.03
   4   5 -53    6.42    0.55
   4   9 -42    9.02    1.03
   4   9 -18    5.83    1.18
   4  10 -30    0.85    1.30
   4  10 -28    2.33    1.31
   4  10 -26    6.23    1.55
   5   4 -52   21.15    0.80
   5   7 -47    1.20    0.89
   5   8 -43    2.32    1.16
   5   8 -19    4.36    0.95
   5   8 -18    0.07    1.02
   5   9 -36   -0.49    1.24
   5   9 -26    1.48    1.23
   5   9 -25  133.64    2.20
   6   6 -45   66.97    1.40
   6   7 -42   25.96    1.28
   6   7 -21   84.54    1.54
   6   8 -37   -0.74    1.43
   6   8 -29    0.40    1.25
   6   8 -28    4.55    1.27
   6   8 -26    1.01    1.48
   7   3 -45   -0.20    0.95
   7   4 -44    2.00    1.07
   7   4 -19    1.29    0.80
   7   5 -43    4.34    1.20
   7   5 -42    1.43    1.08
   7   5 -21    0.32    0.95
   7   6 -39   -0.30    1.43
   7   6 -24    9.90    1.22
   8   2 -37   78.39    1.57
   8   2 -36   -0.01    1.06
   8   2 -29    8.72    0.87
   8   2 -28    8.90    1.04
   8   2 -27    0.29    0.91
   8   3 -37   19.98    1.27
   8   3 -36    1.29    1.23
   8   3 -35    9.67    1.23
   8   3 -34   32.27    1.22
   8   3 -31  164.36    1.94
   8   3 -30    9.17    0.99
   8   3 -28  270.37    2.38
   8   4 -33    0.97    1.24
   8   4 -32    1.42    1.22
  -1  11 -41   -0.24    0.51
   1  10 -45    0.17    0.60
   1  11 -18    1.18    1.05
   2   9 -11   15.40    0.73
   2  10 -44    0.47    0.73
   2  11 -36    2.99    0.95
   2  11 -22    9.17    1.36
   3   9 -46    5.95    0.72
   3  10 -41    0.44    0.84
   3  10 -18   44.30    1.44
   4   6 -52   -0.28    0.53
   4   7 -50   27.08    0.83
   4   8 -47   22.76    0.89
   4  10 -37    0.72    1.37
   4  10 -36    1.49    1.20
   4  10 -23   73.20    1.81
   5   8 -44    0.21    0.89
   5   9 -39    1.04    1.33
   5   9 -38    0.88    1.15
   5   9 -23    6.58    1.19
   6   3 -50   -0.43    0.67
   6   5 -48   21.80    0.91
   6   6 -46    5.00    0.87
   6   7 -43    0.17    0.99
   6   7 -19    0.66    1.07
   6   8 -39   24.19    1.54
   6   8 -38    1.59    1.23
   6   8 -24   55.90    1.73
   7   4 -45    0.61    1.03
   7   4 -18    2.80    0.79
   7   6 -41    1.12    1.29
   7   6 -40    1.70    1.14
   7   6 -23    1.58    0.95
   7   7 -34   -1.98    1.57
   7   7 -33    8.51    1.59
   7   7 -32   66.93    1.91
   7   7 -31    3.77    1.50
   8   2 -26    3.96    0.90
   8   2 -25    8.84    0.90
   8   3 -26    0.47    1.00
   8   4 -37   -0.55    1.29
   8   4 -36    3.28    1.32
   8   4 -35   -0.64    1.08
   8   4 -34   10.66    1.14
   8   4 -31   -1.34    1.01
   8   4 -29   -0.08    0.99
   8   4 -27    6.98    1.16
   0  11 -41   -0.16    0.63
   0  12 -31    0.68    0.99
   0  12 -30   22.54    1.22
   0  12 -29    1.18    1.10
   0  12 -28    1.07    1.15
   0  12 -27   -0.25    1.18
   1  11 -40    0.85    0.68
   2  11 -38   -0.04    0.99
   2  11 -20   33.50    1.44
   3   8 -50   -0.04    0.55
   3   9 -47    0.08    0.69
   3   9 -13    2.68    0.75
   3  10 -42   12.46    0.86
   3  10 -17    2.16    1.10
   3  11 -33   67.19    1.78
   3  11 -32   -0.51    1.34
   3  11 -31    4.70    1.24
   3  11 -26   10.02    1.62
   4   8 -48    0.71    0.74
   4   9 -44   39.20    1.11
   4   9 -16    7.96    1.14
   4  10 -38  242.69    2.39
   4  10 -22    7.13    1.35
   5   6 -50    0.16    0.61
   5   7 -48   -0.55    0.68
   5   8 -45    1.84    0.85
   5   8 -16  131.07    1.74
   5   9 -41    0.36    1.14
   5   9 -40    7.29    1.11
[truncated: 2,887,281 more chars]
