# Supplementary material for: A Tail Does Not Always Make a Difference: Assembly of cds Nets from Co(NCS)2 and 1,4-bis(n-Alkyloxy)-2,5-bis(3,2′:6′,3″-terpyridin-4′-yl)benzene Ligands
Source: Molecules. 2022 Aug 5;27(15):4995. doi: 10.3390/molecules27154995 (PMC9370426; doi:10.3390/molecules27154995)
Supplement: Supplementary file 1 [file molecules-27-04995-s001.zip › CAS_116_2_150K.cif]

data_cas_116_2_150k
_audit_creation_date               2022-01-24
_audit_creation_method
;
Olex2 1.5
(compiled 2021.12.09 svn.r5202d8cf for OlexSys, GUI svn.r6439)
;
_shelx_SHELXL_version_number       '2018/3'
loop_
  _audit_author_name
  _audit_author_email
  _audit_author_address
 'Capomolla, S.S.' simona.capomolla@unibas.ch
;
University of Basel
Department of Chemistry
Mattenstrasse 24a
Basel
Switzerland
;
 'Prescimone, A.' alessandro.prescimone@unibas.ch
;
University of Basel
Department of Chemistry
Mattenstrasse 24a
Basel
Switzerland
;

_audit_contact_author_address
;
University of Basel
Department of Chemistry
Mattenstrasse 24a
Basel
Switzerland
;
_audit_contact_author_email        alessandro.prescimone@unibas.ch
_audit_contact_author_name         'Prescimone, A.'
_audit_contact_author_phone        ''
_publ_contact_author_id_orcid      ''
_publ_section_references
;
Dolomanov, O.V., Bourhis, L.J., Gildea, R.J, Howard, J.A.K. & Puschmann, H.
 (2009), J. Appl. Cryst. 42, 339-341.

Sheldrick, G.M. (2015). Acta Cryst. A71, 3-8.

Sheldrick, G.M. (2015). Acta Cryst. C71, 3-8.
;
_chemical_name_common              ?
_chemical_name_systematic          ?
_chemical_formula_moiety           'C48 H44 Co N8 O2 S2, 4(C6 H4 Cl2)'
_chemical_formula_sum              'C72 H60 Cl8 Co N8 O2 S2'
_chemical_formula_weight           1475.93
_chemical_melting_point            ?
loop_
  _atom_type_symbol
  _atom_type_description
  _atom_type_scat_dispersion_real
  _atom_type_scat_dispersion_imag
  _atom_type_scat_source
 'C' 'C' 0.0137 0.0067 'International Tables Vol C Tables 4.2.6.8 and 6.1.1.4'
 'H' 'H' 0.0000 0.0000 'International Tables Vol C Tables 4.2.6.8 and 6.1.1.4'
 'Cl' 'Cl' 0.3281 0.5435 'International Tables Vol C Tables 4.2.6.8 and 6.1.1.4'
 'Co' 'Co' -0.6628 2.9049
 'International Tables Vol C Tables 4.2.6.8 and 6.1.1.4'
 'N' 'N' 0.0241 0.0134 'International Tables Vol C Tables 4.2.6.8 and 6.1.1.4'
 'O' 'O' 0.0389 0.0241 'International Tables Vol C Tables 4.2.6.8 and 6.1.1.4'
 'S' 'S' 0.2925 0.4295 'International Tables Vol C Tables 4.2.6.8 and 6.1.1.4'

_shelx_space_group_comment
;
The symmetry employed for this shelxl refinement is uniquely defined
by the following loop, which should always be used as a source of
symmetry information in preference to the above space-group names.
They are only intended as comments.
;
_space_group_crystal_system        'monoclinic'
_space_group_IT_number             14
_space_group_name_H-M_alt          'P 1 21/n 1'
_space_group_name_Hall             '-P 2yn'
loop_
  _space_group_symop_operation_xyz
 'x, y, z'
 '-x+1/2, y+1/2, -z+1/2'
 '-x, -y, -z'
 'x-1/2, -y-1/2, z-1/2'

_cell_length_a                     15.3929(3)
_cell_length_b                     14.4011(4)
_cell_length_c                     16.7954(4)
_cell_angle_alpha                  90
_cell_angle_beta                   112.716(2)
_cell_angle_gamma                  90
_cell_volume                       3434.31(15)
_cell_formula_units_Z              2
_cell_measurement_reflns_used      78575
_cell_measurement_temperature      150
_cell_measurement_theta_max        56.09
_cell_measurement_theta_min        2.48
_shelx_estimated_absorpt_T_max     0.590
_shelx_estimated_absorpt_T_min     0.386
_exptl_absorpt_coefficient_mu      3.926
_exptl_absorpt_correction_T_max    0.2143
_exptl_absorpt_correction_T_min    0.0961
_exptl_absorpt_correction_type     multi-scan
_exptl_absorpt_process_details
;
STOE X-Red32, absorption correction by Gaussian integration, analogous to
P. Coppens in: F. R. Ahmed (Editor), "Crystallographic Computing", Munksgaard,
Copenhagen (1970), 255 - 270. Afterwards scaling of reflection intensities was
performed within STOE LANA. J. Koziskova, F. Hahn, J. Richter, J. Kozisek, Acta
Chimica Slovaca, vol. 9, no. 2, 2016, pp. 136 - 140.
Finally a spherical absorption correction was done within STOE LANA.
;
_exptl_absorpt_special_details     ?
_exptl_crystal_colour              pink
_exptl_crystal_colour_primary      pink
_exptl_crystal_density_diffrn      1.427
_exptl_crystal_density_meas        ?
_exptl_crystal_density_method      'not measured'
_exptl_crystal_description         block
_exptl_crystal_F_000               1518
loop_
  _exptl_crystal_face_index_h
  _exptl_crystal_face_index_k
  _exptl_crystal_face_index_l
  _exptl_crystal_face_perp_dist
 0 0 1 0.0661
 -4 -3 -10 0.1292
 17 5 -30 0.1237
 -15 4 30 0.1083
 8 -7 30 0.1122
 -30 -5 -18 0.0753
 0 0 -1 0.0733
 30 2 25 0.0601
 -1 2 -6 0.1298
 -7 -1 15 0.1036
 16 -3 -30 0.1139

_exptl_crystal_size_max            0.3
_exptl_crystal_size_mid            0.2
_exptl_crystal_size_min            0.15
_exptl_crystal_size_rad            0.200
_exptl_transmission_factor_max     ?
_exptl_transmission_factor_min     ?
_diffrn_reflns_av_R_equivalents    0.0594
_diffrn_reflns_av_unetI/netI       0.0337
_diffrn_reflns_Laue_measured_fraction_full  0.996
_diffrn_reflns_Laue_measured_fraction_max  0.979
_diffrn_reflns_limit_h_max         17
_diffrn_reflns_limit_h_min         -18
_diffrn_reflns_limit_k_max         17
_diffrn_reflns_limit_k_min         -17
_diffrn_reflns_limit_l_max         20
_diffrn_reflns_limit_l_min         -13
_diffrn_reflns_number              29543
_diffrn_reflns_point_group_measured_fraction_full  0.996
_diffrn_reflns_point_group_measured_fraction_max  0.979
_diffrn_reflns_theta_full          53.597
_diffrn_reflns_theta_max           55.745
_diffrn_reflns_theta_min           2.881
_diffrn_ambient_temperature        150
_diffrn_detector                   Pilatus300K
_diffrn_detector_area_resol_mean   5.81
_diffrn_detector_type              'DECTRIS PILATUS 300K'
_diffrn_measured_fraction_theta_full  0.996
_diffrn_measured_fraction_theta_max  0.979
_diffrn_measurement_details
;
 3686 frames, detector distance = 60 mm
;
_diffrn_measurement_device         'Eulerian 4-circle diffractometer'
_diffrn_measurement_device_type    'STOE STADIVARI'
_diffrn_measurement_method         'rotation method, \w scans'
_diffrn_radiation_collimation      '1.2 0.6 mm diameter'
_diffrn_radiation_monochromator    'Graded multilayer mirror'
_diffrn_radiation_polarisn_norm    0
_diffrn_radiation_probe            x-ray
_diffrn_radiation_type             GaK\a
_diffrn_radiation_wavelength       1.34143
_diffrn_source                     'Metaljet D2'
_diffrn_source_current             3.570
_diffrn_source_power               0.250
_diffrn_source_voltage             70
_reflns_Friedel_coverage           0.000
_reflns_Friedel_fraction_full      .
_reflns_Friedel_fraction_max       .
_reflns_number_gt                  6270
_reflns_number_total               6585
_reflns_special_details
;
 Reflections were merged by SHELXL according to the crystal
 class for the calculation of statistics and refinement.
 
 _reflns_Friedel_fraction is defined as the number of unique
 Friedel pairs measured divided by the number that would be
 possible theoretically, ignoring centric projections and
 systematic absences.
;
_reflns_threshold_expression       'I > 2\s(I)'
_computing_cell_refinement
;
X-Area Recipe 1.34.0.0 (STOE, 2019)
;
_computing_data_collection
;
X-Area Pilatus3_SV 1.31.154.0 (STOE, 2019)
;
_computing_data_reduction
;
X-Area Integrate 1.77.0.0 (STOE, 2019)
X-Area LANA 1.77.1.0 (STOE, 2019)
X-Area X-Red32 1.65.0.0 (STOE, 2018)
;
_computing_molecular_graphics      'Olex2 1.5 (Dolomanov et al., 2009)'
_computing_publication_material
;
STOE & Cie GmbH, X-Area, software package for collecting single-crystal or
multi-domain crystal data on STOE area-detector diffractometers, for image 
processing, for the correction and scaling of reflection intensities and 
for outlier rejection, version 1.88, Darmstadt 2019
;
_computing_structure_refinement    'SHELXL 2018/3 (Sheldrick, 2015)'
_computing_structure_solution      'SHELXT 2018/2 (Sheldrick, 2018)'
_refine_diff_density_max           1.205
_refine_diff_density_min           -0.718
_refine_diff_density_rms           0.107
_refine_ls_extinction_coef         .
_refine_ls_extinction_method       none
_refine_ls_goodness_of_fit_ref     1.048
_refine_ls_hydrogen_treatment      constr
_refine_ls_matrix_type             full
_refine_ls_number_parameters       392
_refine_ls_number_reflns           6585
_refine_ls_number_restraints       46
_refine_ls_R_factor_all            0.0881
_refine_ls_R_factor_gt             0.0853
_refine_ls_restrained_S_all        1.047
_refine_ls_shift/su_max            0.000
_refine_ls_shift/su_mean           0.000
_refine_ls_structure_factor_coef   Fsqd
_refine_ls_weighting_details      
 'w=1/[\s^2^(Fo^2^)+(0.1026P)^2^+14.1118P] where P=(Fo^2^+2Fc^2^)/3'
_refine_ls_weighting_scheme        calc
_refine_ls_wR_factor_gt            0.2228
_refine_ls_wR_factor_ref           0.2251
_refine_special_details            ?
_olex2_refinement_description
;
1. Fixed Uiso
 At 1.2 times of:
  All C(H) groups, All C(H,H) groups
 At 1.5 times of:
  All C(H,H,H) groups
2. Restrained distances
 Cl3-C31 \\sim Cl4-C37 \\sim Cl5-C36 \\sim Cl6-C42 \\sim Cl2-C30 \\sim Cl1-C25
 with sigma of 0.02
3. Rigid bond restraints
 C23, C22, C21, C20, C19
 with sigma for 1-2 distances of 0.01 and sigma for 1-3 distances of 0.01
4. Uiso/Uaniso restraints and constraints
C19 \\sim C20 \\sim C21 \\sim C22 \\sim C23: within 2A with sigma of 0.04 and
sigma for terminal atoms of 0.08 within 2A
Uanis(C38) = Uanis(C39) = Uanis(C40) = Uanis(C41) = Uanis(C42) = Uanis(C37) =
Uanis(C31) = Uanis(C32) = Uanis(C33) = Uanis(C34) = Uanis(C35) = Uanis(C36)
5. Others
 Fixed Sof: Cl4(0.5) Cl6(0.5) C38(0.5) H38(0.5) C39(0.5) H39(0.5) C40(0.5)
 H40(0.5) C41(0.5) H41(0.5) C42(0.5) C37(0.5) Cl5(0.5) Cl3(0.5) C31(0.5)
 C32(0.5) H32(0.5) C33(0.5) H33(0.5) C34(0.5) H34(0.5) C35(0.5) H35(0.5)
 C36(0.5)
6.a Secondary CH2 refined with riding coordinates:
 C19(H19A,H19B), C20(H20A,H20B), C21(H21A,H21B), C22(H22A,H22B)
6.b Aromatic/amide H refined with riding coordinates:
 C14(H14), C9(H9), C6(H6), C1(H1), C15(H15), C18(H18), C11(H11), C16(H16),
 C17(H17), C2(H2), C3(H3), C26(H26), C27(H27), C28(H28), C29(H29), C38(H38),
 C39(H39), C40(H40), C41(H41), C32(H32), C33(H33), C34(H34), C35(H35)
6.c Fitted hexagon refined as free rotating group:
 C25(C26,C27,C28,C29,C30), C38(C39,C40,C41,C42,C37), C31(C32,C33,C34,C35,C36)
6.d Idealised Me refined as rotating group:
 C23(H23A,H23B,H23C)
;
_atom_sites_solution_hydrogens     geom
_atom_sites_solution_primary       dual
_atom_sites_solution_secondary     ?
loop_
  _atom_site_label
  _atom_site_type_symbol
  _atom_site_fract_x
  _atom_site_fract_y
  _atom_site_fract_z
  _atom_site_U_iso_or_equiv
  _atom_site_adp_type
  _atom_site_occupancy
  _atom_site_site_symmetry_order
  _atom_site_calc_flag
  _atom_site_refinement_flags_posn
  _atom_site_refinement_flags_adp
  _atom_site_refinement_flags_occupancy
  _atom_site_disorder_assembly
  _atom_site_disorder_group
 Co1 Co 0.500000 0.500000 0.000000 0.0182(2) Uani 1 2 d S . P . .
 S1 S 0.59067(10) 0.64048(9) 0.27431(7) 0.0425(3) Uani 1 1 d . . . . .
 Cl2 Cl 0.82764(15) 0.53276(16) 0.52471(17) 0.0895(7) Uani 1 1 d D . . . .
 Cl1 Cl 0.95421(16) 0.34884(19) 0.57951(17) 0.0993(7) Uani 1 1 d D . . . .
 O1 O 0.5359(2) 0.6887(2) 0.5013(2) 0.0313(7) Uani 1 1 d . . . . .
 N3 N 0.8726(2) 0.0441(2) 0.5250(2) 0.0218(7) Uani 1 1 d . . . . .
 N2 N 0.6893(2) 0.2429(2) 0.3661(2) 0.0232(7) Uani 1 1 d . . . . .
 N4 N 0.5343(2) 0.5927(2) 0.1011(2) 0.0243(7) Uani 1 1 d . . . . .
 N1 N 0.5823(2) 0.3934(2) 0.0898(2) 0.0228(7) Uani 1 1 d . . . . .
 Cl4 Cl 0.7242(4) 0.1390(3) 0.7873(3) 0.0865(12) Uani 0.5 1 d D . P A 1
 Cl6 Cl 0.9018(2) 0.2183(3) 0.7585(3) 0.0822(12) Uani 0.5 1 d D . P A 1
 C10 C 0.5198(3) 0.5948(3) 0.4997(2) 0.0231(8) Uani 1 1 d . . . . .
 C14 C 0.8203(3) 0.1162(3) 0.4813(2) 0.0226(8) Uani 1 1 d . . . . .
 H14 H 0.836390 0.144277 0.439059 0.027 Uiso 1 1 calc R U . . .
 C5 C 0.6436(3) 0.3160(3) 0.3196(2) 0.0219(8) Uani 1 1 d . . . . .
 C8 C 0.5466(3) 0.4354(3) 0.4676(2) 0.0232(8) Uani 1 1 d . . . . .
 C13 C 0.7435(3) 0.1510(3) 0.4957(2) 0.0239(8) Uani 1 1 d . . . . .
 C9 C 0.5653(3) 0.5298(3) 0.4676(3) 0.0240(8) Uani 1 1 d . . . . .
 H9 H 0.609009 0.550072 0.445704 0.029 Uiso 1 1 calc R U . . .
 C6 C 0.5983(3) 0.3820(3) 0.3515(3) 0.0239(8) Uani 1 1 d . . . . .
 H6 H 0.570208 0.433999 0.318926 0.029 Uiso 1 1 calc R U . . .
 C7 C 0.5960(3) 0.3685(3) 0.4325(2) 0.0218(8) Uani 1 1 d . . . . .
 C24 C 0.5587(3) 0.6139(3) 0.1728(3) 0.0243(8) Uani 1 1 d . . . . .
 C1 C 0.6363(3) 0.3359(3) 0.0668(3) 0.0308(9) Uani 1 1 d . . . . .
 H1 H 0.634408 0.339506 0.010846 0.037 Uiso 1 1 calc R U . . .
 C15 C 0.7197(3) 0.1084(3) 0.5591(3) 0.0299(9) Uani 1 1 d . . . . .
 H15 H 0.669306 0.130000 0.571379 0.036 Uiso 1 1 calc R U . . .
 C18 C 0.5848(3) 0.3859(3) 0.1700(2) 0.0231(8) Uani 1 1 d . . . . .
 H18 H 0.546147 0.424783 0.186174 0.028 Uiso 1 1 calc R U . . .
 C11 C 0.6425(3) 0.2916(3) 0.4797(3) 0.0248(8) Uani 1 1 d . . . . .
 H11 H 0.641609 0.280046 0.533891 0.030 Uiso 1 1 calc R U . . .
 C4 C 0.6424(3) 0.3228(3) 0.2311(2) 0.0244(8) Uani 1 1 d . . . . .
 C12 C 0.6902(3) 0.2320(3) 0.4458(3) 0.0242(8) Uani 1 1 d . . . . .
 C16 C 0.7727(3) 0.0332(3) 0.6037(3) 0.0304(9) Uani 1 1 d . . . . .
 H16 H 0.757405 0.002771 0.645361 0.036 Uiso 1 1 calc R U . . .
 C17 C 0.8479(3) 0.0041(3) 0.5855(3) 0.0260(8) Uani 1 1 d . . . . .
 H17 H 0.883575 -0.045590 0.616496 0.031 Uiso 1 1 calc R U . . .
 C2 C 0.6950(4) 0.2714(4) 0.1223(3) 0.0391(11) Uani 1 1 d . . . . .
 H2 H 0.731777 0.232410 0.103984 0.047 Uiso 1 1 calc R U . . .
 C19 C 0.6191(3) 0.7189(3) 0.4911(3) 0.0299(9) Uani 1 1 d . U . . .
 H19A H 0.611836 0.712258 0.431405 0.036 Uiso 1 1 calc R U . . .
 H19B H 0.672535 0.681776 0.526804 0.036 Uiso 1 1 calc R U . . .
 C3 C 0.6984(3) 0.2653(3) 0.2051(3) 0.0350(10) Uani 1 1 d . . . . .
 H3 H 0.738260 0.222579 0.243472 0.042 Uiso 1 1 calc R U . . .
 C20 C 0.6352(4) 0.8197(3) 0.5179(4) 0.0473(12) Uani 1 1 d . U . . .
 H20A H 0.638727 0.824518 0.576717 0.057 Uiso 1 1 calc R U . . .
 H20B H 0.696083 0.838017 0.518490 0.057 Uiso 1 1 calc R U . . .
 C21 C 0.5640(5) 0.8877(4) 0.4642(6) 0.074(2) Uani 1 1 d . U . . .
 H21A H 0.502413 0.859043 0.446591 0.088 Uiso 1 1 calc R U . . .
 H21B H 0.564657 0.940493 0.500292 0.088 Uiso 1 1 calc R U . . .
 C25 C 0.9145(3) 0.3921(3) 0.4775(3) 0.0690(19) Uani 1 1 d DG . . . .
 C26 C 0.9399(3) 0.3454(3) 0.4172(4) 0.074(2) Uani 1 1 d G . . . .
 H26 H 0.977886 0.292971 0.433549 0.089 Uiso 1 1 calc R U . . .
 C27 C 0.9083(4) 0.3772(4) 0.3326(3) 0.087(3) Uani 1 1 d G . . . .
 H27 H 0.925266 0.345977 0.292305 0.104 Uiso 1 1 calc R U . . .
 C28 C 0.8515(4) 0.4556(4) 0.3082(3) 0.085(2) Uani 1 1 d G . . . .
 H28 H 0.830394 0.476875 0.251623 0.103 Uiso 1 1 calc R U . . .
 C29 C 0.8262(3) 0.5023(3) 0.3685(3) 0.074(2) Uani 1 1 d G . . . .
 H29 H 0.788143 0.554768 0.352186 0.089 Uiso 1 1 calc R U . . .
 C30 C 0.8577(3) 0.4705(3) 0.4531(3) 0.0629(17) Uani 1 1 d DG . . . .
 C38 C 0.6473(5) 0.3027(6) 0.7326(5) 0.0491(9) Uani 0.5 1 d G . P A 1
 H38 H 0.596646 0.279716 0.743715 0.059 Uiso 0.5 1 calc R U P A 1
 C39 C 0.6439(4) 0.3920(5) 0.7002(5) 0.0491(9) Uani 0.5 1 d G . P A 1
 H39 H 0.590992 0.428829 0.689650 0.059 Uiso 0.5 1 calc R U P A 1
 C40 C 0.7197(6) 0.4264(4) 0.6837(5) 0.0491(9) Uani 0.5 1 d G . P A 1
 H40 H 0.717431 0.486136 0.662009 0.059 Uiso 0.5 1 calc R U P A 1
 C41 C 0.7988(5) 0.3714(6) 0.6995(5) 0.0491(9) Uani 0.5 1 d G . P A 1
 H41 H 0.849525 0.394330 0.688433 0.059 Uiso 0.5 1 calc R U P A 1
 C42 C 0.8022(4) 0.2820(5) 0.7319(6) 0.0491(9) Uani 0.5 1 d DG . P A 1
 C37 C 0.7265(6) 0.2477(4) 0.7485(5) 0.0491(9) Uani 0.5 1 d DG . P A 1
 C22 C 0.5745(7) 0.9214(10) 0.3895(7) 0.117(4) Uani 1 1 d . U . . .
 H22A H 0.565271 0.870207 0.349524 0.141 Uiso 1 1 calc R U . . .
 H22B H 0.638620 0.943283 0.405565 0.141 Uiso 1 1 calc R U . . .
 C23 C 0.5058(8) 1.0017(7) 0.3415(7) 0.100(3) Uani 1 1 d . U . . .
 H23A H 0.507241 1.010165 0.285292 0.150 Uiso 1 1 calc R U . . .
 H23B H 0.525063 1.058089 0.374042 0.150 Uiso 1 1 calc R U . . .
 H23C H 0.443008 0.986082 0.335614 0.150 Uiso 1 1 calc R U . . .
 Cl5 Cl 0.8531(3) 0.1569(3) 0.7917(3) 0.0900(14) Uani 0.5 1 d D . P B 2
 Cl3 Cl 0.6529(4) 0.1846(4) 0.8031(4) 0.117(2) Uani 0.5 1 d D . P B 2
 C31 C 0.6980(6) 0.2641(5) 0.7535(5) 0.0491(9) Uani 0.5 1 d DG . P B 2
 C32 C 0.6442(4) 0.3428(6) 0.7193(5) 0.0491(9) Uani 0.5 1 d G . P B 2
 H32 H 0.585198 0.349290 0.721883 0.059 Uiso 0.5 1 calc R U P B 2
 C33 C 0.6784(6) 0.4116(4) 0.6812(5) 0.0491(9) Uani 0.5 1 d G . P B 2
 H33 H 0.642393 0.464231 0.658284 0.059 Uiso 0.5 1 calc R U P B 2
 C34 C 0.7666(6) 0.4019(5) 0.6773(5) 0.0491(9) Uani 0.5 1 d G . P B 2
 H34 H 0.789482 0.447935 0.651839 0.059 Uiso 0.5 1 calc R U P B 2
 C35 C 0.8204(4) 0.3232(6) 0.7116(5) 0.0491(9) Uani 0.5 1 d G . P B 2
 H35 H 0.879378 0.316697 0.708994 0.059 Uiso 0.5 1 calc R U P B 2
 C36 C 0.7861(5) 0.2544(5) 0.7497(5) 0.0491(9) Uani 0.5 1 d DG . P B 2

loop_
  _atom_site_aniso_label
  _atom_site_aniso_U_11
  _atom_site_aniso_U_22
  _atom_site_aniso_U_33
  _atom_site_aniso_U_23
  _atom_site_aniso_U_13
  _atom_site_aniso_U_12
 Co1 0.0209(4) 0.0179(4) 0.0174(4) -0.0008(3) 0.0092(3) -0.0037(3)
 S1 0.0559(7) 0.0482(7) 0.0272(6) -0.0108(5) 0.0203(5) -0.0157(6)
 Cl2 0.0753(12) 0.0885(14) 0.1211(17) -0.0215(12) 0.0558(12) 0.0132(10)
 Cl1 0.0799(13) 0.1132(18) 0.1145(17) 0.0228(14) 0.0480(13) 0.0285(12)
 O1 0.0382(16) 0.0203(14) 0.0481(18) 0.0003(12) 0.0307(14) 0.0022(12)
 N3 0.0211(15) 0.0219(16) 0.0249(16) 0.0015(13) 0.0115(13) 0.0052(12)
 N2 0.0248(16) 0.0231(16) 0.0248(16) 0.0035(13) 0.0131(13) 0.0048(13)
 N4 0.0259(16) 0.0243(16) 0.0251(17) -0.0030(13) 0.0126(14) -0.0058(13)
 N1 0.0240(16) 0.0236(16) 0.0236(16) 0.0026(13) 0.0125(13) 0.0027(13)
 Cl4 0.138(4) 0.0528(19) 0.074(2) 0.0018(16) 0.046(2) -0.003(2)
 Cl6 0.0522(18) 0.107(3) 0.073(2) -0.005(2) 0.0085(16) 0.038(2)
 C10 0.0253(19) 0.0208(18) 0.0274(19) 0.0021(14) 0.0147(16) 0.0037(15)
 C14 0.0264(19) 0.0227(18) 0.0214(18) 0.0004(15) 0.0121(15) 0.0018(15)
 C5 0.0224(18) 0.0247(19) 0.0220(18) 0.0007(15) 0.0126(15) 0.0032(15)
 C8 0.0283(19) 0.0217(18) 0.0237(18) 0.0029(15) 0.0145(16) 0.0082(15)
 C13 0.0258(19) 0.0237(19) 0.0243(19) 0.0024(15) 0.0121(16) 0.0056(15)
 C9 0.028(2) 0.0222(19) 0.0271(19) 0.0034(15) 0.0167(16) 0.0044(16)
 C6 0.029(2) 0.0206(18) 0.0259(19) 0.0030(15) 0.0145(16) 0.0063(15)
 C7 0.0250(18) 0.0198(18) 0.0260(19) -0.0005(14) 0.0157(16) 0.0029(15)
 C24 0.0255(19) 0.0225(19) 0.029(2) -0.0032(16) 0.0145(16) -0.0060(15)
 C1 0.038(2) 0.035(2) 0.026(2) 0.0016(17) 0.0189(18) 0.0062(18)
 C15 0.033(2) 0.032(2) 0.034(2) 0.0057(17) 0.0228(18) 0.0093(18)
 C18 0.0245(18) 0.0230(19) 0.0235(18) 0.0009(15) 0.0114(15) 0.0032(15)
 C11 0.029(2) 0.026(2) 0.0245(19) 0.0028(15) 0.0158(16) 0.0046(16)
 C4 0.0266(19) 0.027(2) 0.0233(19) 0.0018(15) 0.0139(16) 0.0038(16)
 C12 0.0250(19) 0.0246(19) 0.0262(19) 0.0032(15) 0.0132(16) 0.0050(15)
 C16 0.037(2) 0.029(2) 0.030(2) 0.0092(17) 0.0196(18) 0.0082(18)
 C17 0.028(2) 0.025(2) 0.027(2) 0.0056(15) 0.0130(17) 0.0050(15)
 C2 0.048(3) 0.044(3) 0.036(2) 0.009(2) 0.029(2) 0.022(2)
 C19 0.030(2) 0.027(2) 0.038(2) -0.0010(17) 0.0201(18) -0.0018(17)
 C3 0.041(2) 0.038(2) 0.033(2) 0.0109(19) 0.0214(19) 0.019(2)
 C20 0.043(3) 0.030(2) 0.078(4) -0.004(2) 0.035(3) -0.005(2)
 C21 0.052(3) 0.041(3) 0.136(6) 0.028(4) 0.047(4) 0.010(3)
 C25 0.050(3) 0.056(4) 0.103(6) -0.014(4) 0.030(4) -0.007(3)
 C26 0.063(4) 0.051(4) 0.110(6) -0.016(4) 0.036(4) 0.004(3)
 C27 0.084(5) 0.067(5) 0.116(7) -0.037(5) 0.046(5) -0.003(4)
 C28 0.084(5) 0.078(5) 0.093(6) -0.014(5) 0.032(5) -0.005(4)
 C29 0.060(4) 0.056(4) 0.104(6) -0.010(4) 0.031(4) -0.002(3)
 C30 0.047(3) 0.046(3) 0.104(6) -0.011(3) 0.037(4) -0.007(3)
 C38 0.047(2) 0.048(2) 0.0429(16) -0.0024(15) 0.0064(14) 0.0054(17)
 C39 0.047(2) 0.048(2) 0.0429(16) -0.0024(15) 0.0064(14) 0.0054(17)
 C40 0.047(2) 0.048(2) 0.0429(16) -0.0024(15) 0.0064(14) 0.0054(17)
 C41 0.047(2) 0.048(2) 0.0429(16) -0.0024(15) 0.0064(14) 0.0054(17)
 C42 0.047(2) 0.048(2) 0.0429(16) -0.0024(15) 0.0064(14) 0.0054(17)
 C37 0.047(2) 0.048(2) 0.0429(16) -0.0024(15) 0.0064(14) 0.0054(17)
 C22 0.080(6) 0.167(10) 0.092(6) 0.059(7) 0.018(5) 0.024(6)
 C23 0.106(7) 0.093(7) 0.084(6) 0.023(5) 0.019(5) 0.003(5)
 Cl5 0.098(3) 0.073(2) 0.065(2) -0.0119(18) -0.007(2) 0.030(2)
 Cl3 0.082(3) 0.126(4) 0.120(4) 0.055(3) 0.014(3) -0.036(3)
 C31 0.047(2) 0.048(2) 0.0429(16) -0.0024(15) 0.0064(14) 0.0054(17)
 C32 0.047(2) 0.048(2) 0.0429(16) -0.0024(15) 0.0064(14) 0.0054(17)
 C33 0.047(2) 0.048(2) 0.0429(16) -0.0024(15) 0.0064(14) 0.0054(17)
 C34 0.047(2) 0.048(2) 0.0429(16) -0.0024(15) 0.0064(14) 0.0054(17)
 C35 0.047(2) 0.048(2) 0.0429(16) -0.0024(15) 0.0064(14) 0.0054(17)
 C36 0.047(2) 0.048(2) 0.0429(16) -0.0024(15) 0.0064(14) 0.0054(17)

_geom_special_details
;
 All esds (except the esd in the dihedral angle between two l.s. planes)
 are estimated using the full covariance matrix.  The cell esds are taken
 into account individually in the estimation of esds in distances, angles
 and torsion angles; correlations between esds in cell parameters are only
 used when they are defined by crystal symmetry.  An approximate (isotropic)
 treatment of cell esds is used for estimating esds involving l.s. planes.
;
loop_
  _geom_bond_atom_site_label_1
  _geom_bond_atom_site_label_2
  _geom_bond_distance
  _geom_bond_site_symmetry_2
  _geom_bond_publ_flag
 Co1 N3 2.249(3) 4_565 ?
 Co1 N3 2.249(3) 2_655 ?
 Co1 N4 2.062(3) . ?
 Co1 N4 2.062(3) 3_665 ?
 Co1 N1 2.182(3) . ?
 Co1 N1 2.182(3) 3_665 ?
 S1 C24 1.627(4) . ?
 Cl2 C30 1.701(4) . ?
 Cl1 C25 1.700(5) . ?
 O1 C10 1.373(5) . ?
 O1 C19 1.425(5) . ?
 N3 C14 1.344(5) . ?
 N3 C17 1.344(5) . ?
 N2 C5 1.338(5) . ?
 N2 C12 1.342(5) . ?
 N4 C24 1.156(5) . ?
 N1 C1 1.332(5) . ?
 N1 C18 1.338(5) . ?
 Cl4 C37 1.701(6) . ?
 Cl6 C42 1.691(5) . ?
 C10 C8 1.403(5) 3_666 ?
 C10 C9 1.396(5) . ?
 C14 H14 0.9300 . ?
 C14 C13 1.389(5) . ?
 C5 C6 1.401(5) . ?
 C5 C4 1.483(5) . ?
 C8 C9 1.390(6) . ?
 C8 C7 1.483(5) . ?
 C13 C15 1.395(6) . ?
 C13 C12 1.485(5) . ?
 C9 H9 0.9300 . ?
 C6 H6 0.9300 . ?
 C6 C7 1.388(5) . ?
 C7 C11 1.389(6) . ?
 C1 H1 0.9300 . ?
 C1 C2 1.378(6) . ?
 C15 H15 0.9300 . ?
 C15 C16 1.388(6) . ?
 C18 H18 0.9300 . ?
 C18 C4 1.400(6) . ?
 C11 H11 0.9300 . ?
 C11 C12 1.387(5) . ?
 C4 C3 1.384(6) . ?
 C16 H16 0.9300 . ?
 C16 C17 1.372(6) . ?
 C17 H17 0.9300 . ?
 C2 H2 0.9300 . ?
 C2 C3 1.373(6) . ?
 C19 H19A 0.9700 . ?
 C19 H19B 0.9700 . ?
 C19 C20 1.512(6) . ?
 C3 H3 0.9300 . ?
 C20 H20A 0.9700 . ?
 C20 H20B 0.9700 . ?
 C20 C21 1.487(8) . ?
 C21 H21A 0.9700 . ?
 C21 H21B 0.9700 . ?
 C21 C22 1.412(12) . ?
 C25 C26 1.3900 . ?
 C25 C30 1.3900 . ?
 C26 H26 0.9300 . ?
 C26 C27 1.3900 . ?
 C27 H27 0.9300 . ?
 C27 C28 1.3900 . ?
 C28 H28 0.9300 . ?
 C28 C29 1.3900 . ?
 C29 H29 0.9300 . ?
 C29 C30 1.3900 . ?
 C38 H38 0.9300 . ?
 C38 C39 1.3900 . ?
 C38 C37 1.3900 . ?
 C39 H39 0.9300 . ?
 C39 C40 1.3900 . ?
 C40 H40 0.9300 . ?
 C40 C41 1.3900 . ?
 C41 H41 0.9300 . ?
 C41 C42 1.3900 . ?
 C42 C37 1.3900 . ?
 C22 H22A 0.9700 . ?
 C22 H22B 0.9700 . ?
 C22 C23 1.563(14) . ?
 C23 H23A 0.9600 . ?
 C23 H23B 0.9600 . ?
 C23 H23C 0.9600 . ?
 Cl5 C36 1.723(6) . ?
 Cl3 C31 1.713(6) . ?
 C31 C32 1.3900 . ?
 C31 C36 1.3900 . ?
 C32 H32 0.9300 . ?
 C32 C33 1.3900 . ?
 C33 H33 0.9300 . ?
 C33 C34 1.3900 . ?
 C34 H34 0.9300 . ?
 C34 C35 1.3900 . ?
 C35 H35 0.9300 . ?
 C35 C36 1.3900 . ?

loop_
  _geom_angle_atom_site_label_1
  _geom_angle_atom_site_label_2
  _geom_angle_atom_site_label_3
  _geom_angle
  _geom_angle_site_symmetry_1
  _geom_angle_site_symmetry_3
  _geom_angle_publ_flag
 N3 Co1 N3 180.0(2) 4_565 2_655 ?
 N4 Co1 N3 90.36(12) 3_665 4_565 ?
 N4 Co1 N3 89.64(12) 3_665 2_655 ?
 N4 Co1 N3 90.36(12) . 2_655 ?
 N4 Co1 N3 89.64(12) . 4_565 ?
 N4 Co1 N4 180.00(13) 3_665 . ?
 N4 Co1 N1 89.46(13) 3_665 3_665 ?
 N4 Co1 N1 90.54(13) 3_665 . ?
 N4 Co1 N1 90.54(13) . 3_665 ?
 N4 Co1 N1 89.46(13) . . ?
 N1 Co1 N3 90.70(12) . 2_655 ?
 N1 Co1 N3 89.29(12) 3_665 2_655 ?
 N1 Co1 N3 90.71(12) 3_665 4_565 ?
 N1 Co1 N3 89.30(12) . 4_565 ?
 N1 Co1 N1 180.0 . 3_665 ?
 C10 O1 C19 117.5(3) . . ?
 C14 N3 Co1 119.9(2) . 2_645 ?
 C17 N3 Co1 122.8(3) . 2_645 ?
 C17 N3 C14 117.3(3) . . ?
 C5 N2 C12 118.3(3) . . ?
 C24 N4 Co1 155.0(3) . . ?
 C1 N1 Co1 119.9(3) . . ?
 C1 N1 C18 117.7(3) . . ?
 C18 N1 Co1 122.4(3) . . ?
 O1 C10 C8 116.7(3) . 3_666 ?
 O1 C10 C9 123.7(4) . . ?
 C9 C10 C8 119.6(4) . 3_666 ?
 N3 C14 H14 118.2 . . ?
 N3 C14 C13 123.7(4) . . ?
 C13 C14 H14 118.2 . . ?
 N2 C5 C6 122.5(3) . . ?
 N2 C5 C4 115.9(3) . . ?
 C6 C5 C4 121.5(3) . . ?
 C10 C8 C7 121.2(4) 3_666 . ?
 C9 C8 C10 119.0(3) . 3_666 ?
 C9 C8 C7 119.8(4) . . ?
 C14 C13 C15 117.8(4) . . ?
 C14 C13 C12 120.5(3) . . ?
 C15 C13 C12 121.8(3) . . ?
 C10 C9 H9 119.3 . . ?
 C8 C9 C10 121.4(4) . . ?
 C8 C9 H9 119.3 . . ?
 C5 C6 H6 120.5 . . ?
 C7 C6 C5 119.0(4) . . ?
 C7 C6 H6 120.5 . . ?
 C6 C7 C8 120.6(3) . . ?
 C6 C7 C11 117.9(3) . . ?
 C11 C7 C8 121.4(3) . . ?
 N4 C24 S1 177.9(4) . . ?
 N1 C1 H1 118.6 . . ?
 N1 C1 C2 122.8(4) . . ?
 C2 C1 H1 118.6 . . ?
 C13 C15 H15 120.6 . . ?
 C16 C15 C13 118.8(4) . . ?
 C16 C15 H15 120.6 . . ?
 N1 C18 H18 118.2 . . ?
 N1 C18 C4 123.6(3) . . ?
 C4 C18 H18 118.2 . . ?
 C7 C11 H11 120.1 . . ?
 C12 C11 C7 119.8(4) . . ?
 C12 C11 H11 120.1 . . ?
 C18 C4 C5 122.4(3) . . ?
 C3 C4 C5 120.6(4) . . ?
 C3 C4 C18 117.0(4) . . ?
 N2 C12 C13 116.5(3) . . ?
 N2 C12 C11 122.3(4) . . ?
 C11 C12 C13 121.2(3) . . ?
 C15 C16 H16 120.4 . . ?
 C17 C16 C15 119.2(4) . . ?
 C17 C16 H16 120.4 . . ?
 N3 C17 C16 123.2(4) . . ?
 N3 C17 H17 118.4 . . ?
 C16 C17 H17 118.4 . . ?
 C1 C2 H2 120.4 . . ?
 C3 C2 C1 119.2(4) . . ?
 C3 C2 H2 120.4 . . ?
 O1 C19 H19A 110.1 . . ?
 O1 C19 H19B 110.1 . . ?
 O1 C19 C20 108.0(4) . . ?
 H19A C19 H19B 108.4 . . ?
 C20 C19 H19A 110.1 . . ?
 C20 C19 H19B 110.1 . . ?
 C4 C3 H3 120.1 . . ?
 C2 C3 C4 119.8(4) . . ?
 C2 C3 H3 120.1 . . ?
 C19 C20 H20A 108.0 . . ?
 C19 C20 H20B 108.0 . . ?
 H20A C20 H20B 107.3 . . ?
 C21 C20 C19 117.0(5) . . ?
 C21 C20 H20A 108.0 . . ?
 C21 C20 H20B 108.0 . . ?
 C20 C21 H21A 108.0 . . ?
 C20 C21 H21B 108.0 . . ?
 H21A C21 H21B 107.3 . . ?
 C22 C21 C20 117.1(7) . . ?
 C22 C21 H21A 108.0 . . ?
 C22 C21 H21B 108.0 . . ?
 C26 C25 Cl1 117.6(3) . . ?
 C26 C25 C30 120.0 . . ?
 C30 C25 Cl1 122.3(3) . . ?
 C25 C26 H26 120.0 . . ?
 C25 C26 C27 120.0 . . ?
 C27 C26 H26 120.0 . . ?
 C26 C27 H27 120.0 . . ?
 C28 C27 C26 120.0 . . ?
 C28 C27 H27 120.0 . . ?
 C27 C28 H28 120.0 . . ?
 C29 C28 C27 120.0 . . ?
 C29 C28 H28 120.0 . . ?
 C28 C29 H29 120.0 . . ?
 C28 C29 C30 120.0 . . ?
 C30 C29 H29 120.0 . . ?
 C25 C30 Cl2 122.1(3) . . ?
 C29 C30 Cl2 117.8(3) . . ?
 C29 C30 C25 120.0 . . ?
 C39 C38 H38 120.0 . . ?
 C39 C38 C37 120.0 . . ?
 C37 C38 H38 120.0 . . ?
 C38 C39 H39 120.0 . . ?
 C40 C39 C38 120.0 . . ?
 C40 C39 H39 120.0 . . ?
 C39 C40 H40 120.0 . . ?
 C39 C40 C41 120.0 . . ?
 C41 C40 H40 120.0 . . ?
 C40 C41 H41 120.0 . . ?
 C42 C41 C40 120.0 . . ?
 C42 C41 H41 120.0 . . ?
 C41 C42 Cl6 119.9(6) . . ?
 C41 C42 C37 120.0 . . ?
 C37 C42 Cl6 119.9(6) . . ?
 C38 C37 Cl4 116.8(6) . . ?
 C42 C37 Cl4 123.2(6) . . ?
 C42 C37 C38 120.0 . . ?
 C21 C22 H22A 108.5 . . ?
 C21 C22 H22B 108.5 . . ?
 C21 C22 C23 115.2(9) . . ?
 H22A C22 H22B 107.5 . . ?
 C23 C22 H22A 108.5 . . ?
 C23 C22 H22B 108.5 . . ?
 C22 C23 H23A 109.5 . . ?
 C22 C23 H23B 109.5 . . ?
 C22 C23 H23C 109.5 . . ?
 H23A C23 H23B 109.5 . . ?
 H23A C23 H23C 109.5 . . ?
 H23B C23 H23C 109.5 . . ?
 C32 C31 Cl3 117.2(6) . . ?
 C32 C31 C36 120.0 . . ?
 C36 C31 Cl3 122.8(6) . . ?
 C31 C32 H32 120.0 . . ?
 C31 C32 C33 120.0 . . ?
 C33 C32 H32 120.0 . . ?
 C32 C33 H33 120.0 . . ?
 C34 C33 C32 120.0 . . ?
 C34 C33 H33 120.0 . . ?
 C33 C34 H34 120.0 . . ?
 C33 C34 C35 120.0 . . ?
 C35 C34 H34 120.0 . . ?
 C34 C35 H35 120.0 . . ?
 C34 C35 C36 120.0 . . ?
 C36 C35 H35 120.0 . . ?
 C31 C36 Cl5 120.3(6) . . ?
 C35 C36 Cl5 119.7(6) . . ?
 C35 C36 C31 120.0 . . ?

loop_
  _geom_torsion_atom_site_label_1
  _geom_torsion_atom_site_label_2
  _geom_torsion_atom_site_label_3
  _geom_torsion_atom_site_label_4
  _geom_torsion
  _geom_torsion_site_symmetry_1
  _geom_torsion_site_symmetry_2
  _geom_torsion_site_symmetry_3
  _geom_torsion_site_symmetry_4
  _geom_torsion_publ_flag
 Co1 N3 C14 C13 -176.6(3) 2_645 . . . ?
 Co1 N3 C17 C16 177.1(3) 2_645 . . . ?
 Co1 N1 C1 C2 175.4(4) . . . . ?
 Co1 N1 C18 C4 -175.0(3) . . . . ?
 Cl1 C25 C26 C27 179.2(4) . . . . ?
 Cl1 C25 C30 Cl2 3.1(4) . . . . ?
 Cl1 C25 C30 C29 -179.1(4) . . . . ?
 O1 C10 C9 C8 179.8(4) . . . . ?
 O1 C19 C20 C21 -65.5(6) . . . . ?
 N3 C14 C13 C15 0.0(6) . . . . ?
 N3 C14 C13 C12 178.9(4) . . . . ?
 N2 C5 C6 C7 -3.7(6) . . . . ?
 N2 C5 C4 C18 169.1(4) . . . . ?
 N2 C5 C4 C3 -10.2(6) . . . . ?
 N1 C1 C2 C3 0.1(8) . . . . ?
 N1 C18 C4 C5 -179.9(4) . . . . ?
 N1 C18 C4 C3 -0.6(6) . . . . ?
 Cl6 C42 C37 Cl4 -5.3(6) . . . . ?
 Cl6 C42 C37 C38 175.2(6) . . . . ?
 C10 O1 C19 C20 -165.5(4) . . . . ?
 C10 C8 C9 C10 0.3(7) 3_666 . . . ?
 C10 C8 C7 C6 128.8(4) 3_666 . . . ?
 C10 C8 C7 C11 -52.2(6) 3_666 . . . ?
 C14 N3 C17 C16 0.3(6) . . . . ?
 C14 C13 C15 C16 -0.8(6) . . . . ?
 C14 C13 C12 N2 28.8(6) . . . . ?
 C14 C13 C12 C11 -152.4(4) . . . . ?
 C5 N2 C12 C13 -178.7(3) . . . . ?
 C5 N2 C12 C11 2.6(6) . . . . ?
 C5 C6 C7 C8 -178.3(4) . . . . ?
 C5 C6 C7 C11 2.6(6) . . . . ?
 C5 C4 C3 C2 178.8(4) . . . . ?
 C8 C10 C9 C8 -0.3(7) 3_666 . . . ?
 C8 C7 C11 C12 -178.2(4) . . . . ?
 C13 C15 C16 C17 1.4(7) . . . . ?
 C9 C8 C7 C6 -50.6(6) . . . . ?
 C9 C8 C7 C11 128.4(4) . . . . ?
 C6 C5 C4 C18 -10.1(6) . . . . ?
 C6 C5 C4 C3 170.6(4) . . . . ?
 C6 C7 C11 C12 0.8(6) . . . . ?
 C7 C8 C9 C10 179.7(4) . . . . ?
 C7 C11 C12 N2 -3.6(6) . . . . ?
 C7 C11 C12 C13 177.8(4) . . . . ?
 C1 N1 C18 C4 1.5(6) . . . . ?
 C1 C2 C3 C4 0.8(8) . . . . ?
 C15 C13 C12 N2 -152.3(4) . . . . ?
 C15 C13 C12 C11 26.4(6) . . . . ?
 C15 C16 C17 N3 -1.2(7) . . . . ?
 C18 N1 C1 C2 -1.2(7) . . . . ?
 C18 C4 C3 C2 -0.6(7) . . . . ?
 C4 C5 C6 C7 175.4(4) . . . . ?
 C12 N2 C5 C6 1.1(6) . . . . ?
 C12 N2 C5 C4 -178.1(3) . . . . ?
 C12 C13 C15 C16 -179.7(4) . . . . ?
 C17 N3 C14 C13 0.3(6) . . . . ?
 C19 O1 C10 C8 163.3(4) . . . 3_666 ?
 C19 O1 C10 C9 -16.8(6) . . . . ?
 C19 C20 C21 C22 -84.2(9) . . . . ?
 C20 C21 C22 C23 -172.7(8) . . . . ?
 C25 C26 C27 C28 0.0 . . . . ?
 C26 C25 C30 Cl2 -177.8(4) . . . . ?
 C26 C25 C30 C29 0.0 . . . . ?
 C26 C27 C28 C29 0.0 . . . . ?
 C27 C28 C29 C30 0.0 . . . . ?
 C28 C29 C30 Cl2 177.8(4) . . . . ?
 C28 C29 C30 C25 0.0 . . . . ?
 C30 C25 C26 C27 0.0 . . . . ?
 C38 C39 C40 C41 0.0 . . . . ?
 C39 C38 C37 Cl4 -179.5(6) . . . . ?
 C39 C38 C37 C42 0.0 . . . . ?
 C39 C40 C41 C42 0.0 . . . . ?
 C40 C41 C42 Cl6 -175.2(7) . . . . ?
 C40 C41 C42 C37 0.0 . . . . ?
 C41 C42 C37 Cl4 179.5(7) . . . . ?
 C41 C42 C37 C38 0.0 . . . . ?
 C37 C38 C39 C40 0.0 . . . . ?
 Cl3 C31 C32 C33 177.5(7) . . . . ?
 Cl3 C31 C36 Cl5 2.9(7) . . . . ?
 Cl3 C31 C36 C35 -177.3(7) . . . . ?
 C31 C32 C33 C34 0.0 . . . . ?
 C32 C31 C36 Cl5 -179.8(6) . . . . ?
 C32 C31 C36 C35 0.0 . . . . ?
 C32 C33 C34 C35 0.0 . . . . ?
 C33 C34 C35 C36 0.0 . . . . ?
 C34 C35 C36 Cl5 179.8(6) . . . . ?
 C34 C35 C36 C31 0.0 . . . . ?
 C36 C31 C32 C33 0.0 . . . . ?

_shelx_res_file
;
TITL cas_116_2_150k_a.res in P2(1)/n
    cas_116_2_150k.res
    created by SHELXL-2018/3 at 11:11:55 on 24-Jan-2022
REM Old TITL
REM SHELXT solution in P2(1)/n: R1 0.202, Rweak 0.022, Alpha 0.062
REM <I/s> 0.000 for 0 systematic absences, Orientation as input
REM Formula found by SHELXT: C74 N10 S6 O4 Co
CELL 1.34143 15.3929 14.4011 16.7954 90 112.716 90
ZERR 2 0.0003 0.0004 0.0004 0 0.002 0
LATT 1
SYMM 0.5-X,0.5+Y,0.5-Z
SFAC C H Cl Co N O S
DISP C 0.0137 0.0067 57.1
DISP Cl 0.3281 0.5435 4162.2
DISP Co -0.6628 2.9049 22109.5
DISP H 0 0 0.6
DISP N 0.0241 0.0134 109.9
DISP O 0.0389 0.0241 193.4
DISP S 0.2925 0.4295 3294.4
UNIT 144 120 16 2 16 4 4
SADI Cl3 C31 Cl4 C37 Cl5 C36 Cl6 C42 Cl2 C30 Cl1 C25
EADP C38 C39 C40 C41 C42 C37 C31 C32 C33 C34 C35 C36
SIMU C19 C20 C21 C22 C23
DELU C23 C22 C21 C20 C19

L.S. 10
PLAN  6
SIZE 0.15 0.2 0.3
CONF
BOND
list 4
fmap 2
ACTA
MORE -1
BOND $H
OMIT -1 4 2
OMIT -4 2 4
OMIT -1 2 1
OMIT -1 1 7
REM <olex2.extras>
REM <HklSrc "%./CAS_116_2_150K.hkl">
REM </olex2.extras>

WGHT    0.102600   14.111801
FVAR       0.34718
CO1   4    0.500000    0.500000    0.000000    10.50000    0.02089    0.01794 =
         0.01741   -0.00081    0.00917   -0.00371
S1    7    0.590674    0.640480    0.274310    11.00000    0.05592    0.04820 =
         0.02721   -0.01079    0.02025   -0.01572
CL2   3    0.827643    0.532762    0.524711    11.00000    0.07530    0.08847 =
         0.12112   -0.02148    0.05583    0.01323
CL1   3    0.954207    0.348838    0.579510    11.00000    0.07988    0.11319 =
         0.11445    0.02279    0.04804    0.02849
O1    6    0.535883    0.688679    0.501342    11.00000    0.03816    0.02028 =
         0.04814    0.00032    0.03072    0.00224
N3    5    0.872617    0.044113    0.524967    11.00000    0.02112    0.02191 =
         0.02490    0.00149    0.01151    0.00520
N2    5    0.689306    0.242885    0.366104    11.00000    0.02475    0.02315 =
         0.02480    0.00352    0.01312    0.00478
N4    5    0.534317    0.592685    0.101128    11.00000    0.02591    0.02429 =
         0.02507   -0.00304    0.01259   -0.00579
N1    5    0.582308    0.393376    0.089781    11.00000    0.02404    0.02362 =
         0.02361    0.00262    0.01251    0.00271
PART 1
CL4   3    0.724234    0.139027    0.787293    10.50000    0.13769    0.05284 =
         0.07379    0.00175    0.04616   -0.00292
CL6   3    0.901763    0.218290    0.758456    10.50000    0.05216    0.10721 =
         0.07312   -0.00472    0.00851    0.03776

PART 0
C10   1    0.519804    0.594773    0.499668    11.00000    0.02529    0.02077 =
         0.02742    0.00208    0.01469    0.00371
C14   1    0.820260    0.116158    0.481297    11.00000    0.02637    0.02275 =
         0.02137    0.00038    0.01213    0.00179
AFIX  43
H14   2    0.836390    0.144277    0.439059    11.00000   -1.20000
AFIX   0
C5    1    0.643573    0.316046    0.319614    11.00000    0.02244    0.02469 =
         0.02204    0.00066    0.01255    0.00316
C8    1    0.546571    0.435357    0.467621    11.00000    0.02827    0.02166 =
         0.02373    0.00286    0.01450    0.00816
C13   1    0.743454    0.150953    0.495701    11.00000    0.02583    0.02373 =
         0.02433    0.00244    0.01207    0.00557
C9    1    0.565267    0.529776    0.467582    11.00000    0.02833    0.02216 =
         0.02709    0.00340    0.01670    0.00445
AFIX  43
H9    2    0.609009    0.550072    0.445704    11.00000   -1.20000
AFIX   0
C6    1    0.598295    0.381985    0.351521    11.00000    0.02884    0.02057 =
         0.02591    0.00302    0.01450    0.00630
AFIX  43
H6    2    0.570208    0.433999    0.318926    11.00000   -1.20000
AFIX   0
C7    1    0.595994    0.368499    0.432535    11.00000    0.02496    0.01976 =
         0.02599   -0.00046    0.01566    0.00294
C24   1    0.558650    0.613881    0.172826    11.00000    0.02548    0.02247 =
         0.02862   -0.00316    0.01451   -0.00600
C1    1    0.636341    0.335909    0.066793    11.00000    0.03795    0.03469 =
         0.02572    0.00163    0.01886    0.00620
AFIX  43
H1    2    0.634408    0.339506    0.010846    11.00000   -1.20000
AFIX   0
C15   1    0.719727    0.108382    0.559131    11.00000    0.03265    0.03240 =
         0.03367    0.00568    0.02279    0.00929
AFIX  43
H15   2    0.669306    0.130000    0.571379    11.00000   -1.20000
AFIX   0
C18   1    0.584790    0.385919    0.170046    11.00000    0.02454    0.02304 =
         0.02351    0.00093    0.01140    0.00319
AFIX  43
H18   2    0.546147    0.424783    0.186174    11.00000   -1.20000
AFIX   0
C11   1    0.642466    0.291563    0.479714    11.00000    0.02910    0.02584 =
         0.02454    0.00279    0.01580    0.00460
AFIX  43
H11   2    0.641609    0.280046    0.533891    11.00000   -1.20000
AFIX   0
C4    1    0.642350    0.322842    0.231069    11.00000    0.02660    0.02722 =
         0.02331    0.00180    0.01385    0.00384
C12   1    0.690154    0.231968    0.445759    11.00000    0.02498    0.02457 =
         0.02616    0.00320    0.01319    0.00504
C16   1    0.772721    0.033152    0.603667    11.00000    0.03745    0.02914 =
         0.03041    0.00922    0.01961    0.00820
AFIX  43
H16   2    0.757405    0.002771    0.645361    11.00000   -1.20000
AFIX   0
C17   1    0.847931    0.004149    0.585464    11.00000    0.02820    0.02548 =
         0.02652    0.00555    0.01300    0.00504
AFIX  43
H17   2    0.883575   -0.045590    0.616496    11.00000   -1.20000
AFIX   0
C2    1    0.694982    0.271357    0.122319    11.00000    0.04787    0.04448 =
         0.03614    0.00854    0.02855    0.02155
AFIX  43
H2    2    0.731777    0.232410    0.103984    11.00000   -1.20000
AFIX   0
C19   1    0.619132    0.718945    0.491123    11.00000    0.03033    0.02742 =
         0.03806   -0.00097    0.02006   -0.00178
AFIX  23
H19A  2    0.611836    0.712258    0.431405    11.00000   -1.20000
H19B  2    0.672535    0.681776    0.526804    11.00000   -1.20000
AFIX   0
C3    1    0.698403    0.265263    0.205050    11.00000    0.04116    0.03780 =
         0.03257    0.01092    0.02139    0.01878
AFIX  43
H3    2    0.738260    0.222579    0.243472    11.00000   -1.20000
AFIX   0
C20   1    0.635202    0.819737    0.517938    11.00000    0.04345    0.03032 =
         0.07821   -0.00417    0.03474   -0.00500
AFIX  23
H20A  2    0.638727    0.824518    0.576717    11.00000   -1.20000
H20B  2    0.696083    0.838017    0.518490    11.00000   -1.20000
AFIX   0
C21   1    0.564027    0.887719    0.464186    11.00000    0.05229    0.04117 =
         0.13637    0.02847    0.04667    0.01030
AFIX  23
H21A  2    0.502413    0.859043    0.446591    11.00000   -1.20000
H21B  2    0.564657    0.940493    0.500292    11.00000   -1.20000
AFIX  66

C25   1    0.914542    0.392111    0.477493    11.00000    0.04960    0.05558 =
         0.10256   -0.01417    0.03032   -0.00663
C26   1    0.939856    0.345443    0.417242    11.00000    0.06281    0.05074 =
         0.11029   -0.01626    0.03597    0.00364
AFIX  43
H26   2    0.977886    0.292971    0.433549    11.00000   -1.20000
AFIX  65
C27   1    0.908329    0.377201    0.332617    11.00000    0.08404    0.06688 =
         0.11570   -0.03739    0.04570   -0.00289
AFIX  43
H27   2    0.925266    0.345977    0.292305    11.00000   -1.20000
AFIX  65
C28   1    0.851488    0.455627    0.308243    11.00000    0.08380    0.07776 =
         0.09259   -0.01365    0.03153   -0.00496
AFIX  43
H28   2    0.830394    0.476875    0.251623    11.00000   -1.20000
AFIX  65
C29   1    0.826173    0.502296    0.368494    11.00000    0.06019    0.05583 =
         0.10443   -0.01031    0.03072   -0.00165
AFIX  43
H29   2    0.788143    0.554768    0.352186    11.00000   -1.20000
AFIX  65
C30   1    0.857699    0.470538    0.453119    11.00000    0.04663    0.04589 =
         0.10356   -0.01099    0.03721   -0.00707
AFIX  66

PART 1
C38   1    0.647331    0.302688    0.732635    10.50000    0.04678    0.04773 =
         0.04285   -0.00240    0.00642    0.00539
AFIX  43
H38   2    0.596646    0.279716    0.743715    10.50000   -1.20000
AFIX  65
C39   1    0.643943    0.392027    0.700243    10.50000    0.04678    0.04773 =
         0.04285   -0.00240    0.00642    0.00539
AFIX  43
H39   2    0.590992    0.428829    0.689650    10.50000   -1.20000
AFIX  65
C40   1    0.719698    0.426362    0.683682    10.50000    0.04678    0.04773 =
         0.04285   -0.00240    0.00642    0.00539
AFIX  43
H40   2    0.717431    0.486136    0.662009    10.50000   -1.20000
AFIX  65
C41   1    0.798840    0.371357    0.699513    10.50000    0.04678    0.04773 =
         0.04285   -0.00240    0.00642    0.00539
AFIX  43
H41   2    0.849525    0.394330    0.688433    10.50000   -1.20000
AFIX  65
C42   1    0.802229    0.282018    0.731905    10.50000    0.04678    0.04773 =
         0.04285   -0.00240    0.00642    0.00539
C37   1    0.726476    0.247682    0.748466    10.50000    0.04678    0.04773 =
         0.04285   -0.00240    0.00642    0.00539
AFIX   0

PART 0
C22   1    0.574469    0.921441    0.389455    11.00000    0.07972    0.16659 =
         0.09173    0.05874    0.01797    0.02412
AFIX  23
H22A  2    0.565271    0.870207    0.349524    11.00000   -1.20000
H22B  2    0.638620    0.943283    0.405565    11.00000   -1.20000
AFIX   0
C23   1    0.505823    1.001686    0.341472    11.00000    0.10646    0.09254 =
         0.08409    0.02284    0.01863    0.00343
AFIX 137
H23A  2    0.507241    1.010165    0.285292    11.00000   -1.50000
H23B  2    0.525063    1.058089    0.374042    11.00000   -1.50000
H23C  2    0.443008    0.986082    0.335614    11.00000   -1.50000
AFIX   0

PART 2
CL5   3    0.853130    0.156937    0.791688    10.50000    0.09814    0.07255 =
         0.06473   -0.01189   -0.00679    0.03031
CL3   3    0.652893    0.184648    0.803149    10.50000    0.08169    0.12560 =
         0.12049    0.05502    0.01445   -0.03621
AFIX  66
C31   1    0.698020    0.264127    0.753544    10.50000    0.04678    0.04773 =
         0.04285   -0.00240    0.00642    0.00539
C32   1    0.644161    0.342757    0.719300    10.50000    0.04678    0.04773 =
         0.04285   -0.00240    0.00642    0.00539
AFIX  43
H32   2    0.585198    0.349290    0.721883    10.50000   -1.20000
AFIX  65
C33   1    0.678428    0.411623    0.681195    10.50000    0.04678    0.04773 =
         0.04285   -0.00240    0.00642    0.00539
AFIX  43
H33   2    0.642393    0.464231    0.658284    10.50000   -1.20000
AFIX  65
C34   1    0.766555    0.401859    0.677334    10.50000    0.04678    0.04773 =
         0.04285   -0.00240    0.00642    0.00539
AFIX  43
H34   2    0.789482    0.447935    0.651839    10.50000   -1.20000
AFIX  65
C35   1    0.820415    0.323230    0.711577    10.50000    0.04678    0.04773 =
         0.04285   -0.00240    0.00642    0.00539
AFIX  43
H35   2    0.879378    0.316697    0.708994    10.50000   -1.20000
AFIX  65
C36   1    0.786149    0.254363    0.749682    10.50000    0.04678    0.04773 =
         0.04285   -0.00240    0.00642    0.00539
AFIX   0
HKLF 4


REM  cas_116_2_150k_a.res in P2(1)/n
REM wR2 = 0.2251, GooF = S = 1.048, Restrained GooF = 1.047 for all data
REM R1 = 0.0853 for 6270 Fo > 4sig(Fo) and 0.0881 for all 6585 data
REM 392 parameters refined using 46 restraints

END

WGHT      0.1026     14.1137

REM Highest difference peak  1.205,  deepest hole -0.718,  1-sigma level  0.107
Q1    1   0.5653  0.9807  0.4198  11.00000  0.05    1.20
Q2    1   0.5473  0.8588  0.4085  11.00000  0.05    1.15
Q3    1   0.5495  0.7000  0.2448  11.00000  0.05    0.51
Q4    1   0.8979  0.3587  0.5256  11.00000  0.05    0.48
Q5    1   0.8550  0.6030  0.5544  11.00000  0.05    0.47
Q6    1   0.9593  0.4176  0.5874  11.00000  0.05    0.46
;
_shelx_res_checksum                32042
_shelx_hkl_file
;
  -4 -17  -1    1.86    1.63
  -2 -16  -4   24.44    1.76
  -2 -13   5   92.40    1.96
   0 -14   0   14.21    1.71
   1 -12   1  102.48    1.98
   1 -11   2  242.52    2.40
   2  -9   1  135.25    1.59
   3 -10  -4  142.00    1.80
  -6 -16   5    8.67    1.27
  -3 -13   6   22.73    1.47
  -2 -16  -2  101.35    2.29
  -1 -15   0   41.48    1.95
   1 -13  -1    2.10    1.52
   2 -12  -4   87.74    1.91
  -5 -17   1   -1.23    1.39
  -3 -16  -5   22.22    1.65
  -3 -16   1   45.11    1.86
  -1 -15  -5    1.85    1.84
  -1 -15  -1    9.13    2.03
  -1 -11   5   12.61    1.20
  -1  -8   6  296.81    2.00
   0 -10   4   29.60    1.30
   1 -13  -6   26.85    1.58
   2 -11  -7   29.60    1.55
   2 -11  -1  171.06    2.15
   2 -10   0  371.65    2.62
   3  -9  -6    6.53    0.84
  -2 -11   6   51.36    1.56
  -1 -15  -4   94.70    2.42
  -1 -12   4    2.10    1.54
   0 -13   1   54.05    2.10
   1 -13  -2   73.68    2.00
   3  -9  -4    6.80    0.85
  -3 -16   0   18.97    1.78
  -3 -15   3    2.42    1.54
  -3 -11   7   63.49    1.63
  -1 -15  -2  128.06    2.52
   0 -14  -2    7.09    1.68
   1 -13  -4  182.43    2.55
   1 -12   0   33.08    1.58
  -7 -16   5    8.35    1.22
  -5 -15   5    6.70    1.68
  -4 -15   4    1.32    1.45
  -3 -15  -7   16.18    1.43
  -2 -15  -6  101.01    2.18
  -1 -14  -7  103.32    2.21
  -1 -14   1    1.74    1.61
   0 -14  -4   46.20    1.90
   2 -11  -6   36.29    1.39
   2  -9   0   63.25    1.23
  -3 -16  -2    8.69    1.90
  -3 -16  -1    1.20    1.60
  -1 -10   5    9.15    1.01
   1 -12  -7   44.51    1.64
   2 -11  -4   50.78    1.68
   2 -10  -1   10.24    1.05
  -3 -14   4   36.38    1.74
  -2 -15   0   27.70    1.88
   1 -12  -1   41.23    1.64
   2 -10  -7    3.30    1.19
  -5 -14   6   11.35    1.52
  -5 -13   7   14.23    1.59
  -3 -13   5   10.16    1.44
  -2 -15  -5    9.60    1.69
  -1 -13   2  112.47    2.20
   1  -9   2  115.28    1.48
  -4 -16  -4   99.91    2.25
  -4 -16   0    4.75    1.88
  -3 -15  -6   56.38    1.97
  -2 -15  -4   10.41    1.95
  -2 -14   2    0.87    1.58
  -1 -11   4    6.00    1.18
   1 -12  -2   36.96    1.61
   1 -11   0   58.47    1.54
   2 -10  -2  209.50    2.08
   2  -9  -1  211.75    1.95
  -7 -16   4    0.24    1.29
  -2 -15  -2   49.32    2.08
  -2 -14  -7    0.01    1.57
  -1  -9   5  562.10    2.87
   0 -13  -6    2.30    1.41
   0 -12   1   52.84    1.71
   2 -10  -6  400.99    2.79
  -6 -15   5   37.31    1.75
  -4 -16  -2   19.33    1.91
  -3 -15   1    8.39    1.71
  -1 -14  -5    8.25    1.64
   0 -13  -2    4.47    1.83
   2 -10  -5   22.25    1.27
  -5 -16   1    3.69    1.71
  -3 -14   3   39.78    1.86
  -2 -11   5   26.02    1.31
  -1 -14  -4   21.62    1.76
  -1 -14  -2   -0.03    1.65
  -1 -13   1    1.08    1.53
   0 -13  -4    4.90    1.78
   1 -11  -7  322.80    2.83
   1 -11  -1   11.93    1.45
   2  -9  -7  240.90    2.10
  -8 -15   6    3.78    1.39
  -6 -16   2   48.64    1.98
  -3 -15  -5   10.34    1.72
  -3 -15   0    6.18    2.05
  -2 -14   1   86.10    2.22
  -2 -12   4  149.95    2.21
  -1 -13  -7    2.31    1.65
   0 -12   0    2.17    1.61
  -6 -14   6   13.35    1.52
  -5 -16  -2    7.40    1.91
  -5 -16  -1   40.87    2.17
  -5 -16   0    1.63    1.71
  -5 -14   5   45.79    1.98
  -4 -15   2    1.91    1.60
  -4 -14   4   92.54    2.13
  -4 -11   7    4.75    1.30
  -3 -11   6  429.75    3.01
  -3  -9   7   -1.23    0.89
  -2 -14  -6   46.82    2.01
  -1 -10   4  103.64    1.58
  -7 -15   5    6.94    1.58
  -6 -13   7   49.47    1.83
  -3 -15  -4    8.46    1.73
  -3 -14  -7   46.46    1.82
  -3 -12   5   69.53    1.74
  -2 -14   0   38.32    2.23
   1 -11  -6  124.08    2.02
   1 -11  -2  247.84    2.46
   2  -9  -6   53.71    1.18
  -8 -14   7    3.24    1.36
  -7 -16   2    1.64    1.58
  -6 -16   1   19.56    1.77
  -6 -15   4    1.11    1.52
  -4 -13   5  396.13    3.33
  -3 -15  -2   26.95    1.95
  -3 -14   2   86.38    2.21
  -1 -13   0    9.99    1.63
   0 -12  -1   30.57    1.81
   0 -10   2  267.12    2.27
   2  -9  -5   39.30    1.10
   2  -9  -4   70.77    1.27
  -6 -16  -2   24.75    2.07
  -6 -16   0   20.58    1.94
  -2 -14  -5    0.78    1.62
  -2 -14  -1   52.15    2.36
  -2 -13   2   85.86    2.08
   1 -11  -4    4.55    1.21
  -2 -14  -4   45.92    2.25
  -2 -10   5   37.70    1.23
   0 -12  -2    3.48    1.65
   1 -10  -1    4.65    1.00
  -8 -15   5    2.25    1.37
  -7 -16   1   32.54    1.88
  -5 -15   2  119.68    2.43
  -4 -15   0   22.23    1.92
  -2 -12   3  190.63    2.43
  -1 -13  -5    2.68    1.78
  -1 -12   1  102.04    2.02
  -1  -9   4   15.12    0.89
   0 -12  -5   45.15    1.69
   1  -9   0  326.14    2.25
  -7 -16   0   26.88    1.99
  -6 -15   3   15.04    1.63
  -5 -15  -5    2.63    1.44
  -4 -15  -1   14.02    1.88
  -3 -14   1   86.80    2.34
  -3 -13   3    5.63    1.55
  -2 -13  -7  118.64    2.24
  -2 -13   1   12.49    1.93
  -1 -13  -2   12.74    1.67
   0 -12  -4    4.96    1.42
  -7 -13   7   10.40    1.59
  -6 -11   8    1.22    1.20
  -4 -15  -2   12.21    1.87
  -1 -11   2  110.37    1.88
   0  -9   2   12.63    0.89
   1 -10  -6   19.03    1.24
  -6 -15  -5   28.93    1.62
  -5 -14  -7   24.82    1.55
  -4 -13   4   25.30    1.66
  -3 -14   0    4.85    1.77
  -3 -12   4    5.21    1.38
  -3 -11   5   66.66    1.60
  -1 -12  -7    8.36    1.62
   0 -11  -7   41.07    1.55
 -10 -14   7    0.68    1.10
  -8 -15   4    1.66    1.51
  -6 -15   2   11.61    1.96
  -6 -13   6    2.73    1.38
  -6 -12   7   -0.81    1.46
  -5 -13   5    4.71    1.48
  -5 -11   7    8.23    1.41
  -2  -9   5   13.11    0.89
   0 -11  -1  130.44    1.96
   1  -9  -1    8.50    0.88
  -5 -14   3    4.54    1.92
  -5 -12   6    5.75    1.47
  -4 -14  -6   86.68    2.15
  -4 -12   5   27.90    1.49
  -3 -14  -4    7.47    1.77
  -2 -12   2  201.53    2.50
  -7 -14   5    5.43    1.57
  -6 -14   4    2.48    1.81
  -5 -15  -1    1.22    1.81
  -3 -14  -2    5.10    1.81
  -3 -13  -7   21.84    1.79
  -1 -12  -6   15.50    1.69
   0 -11  -2    0.97    1.21
  -8 -13   7    7.27    1.54
  -6 -15   1   29.46    1.92
  -2 -13  -5    6.81    1.66
  -2 -13  -1   72.30    2.11
  -2 -10   4  265.86    2.27
  -1 -12  -1   96.08    2.02
  -1 -11   1    2.75    1.20
   0 -10   0   15.37    1.07
   1  -9  -2  197.74    1.83
  -9 -14   6   19.94    1.49
  -7 -15   2    3.69    1.71
  -5 -14  -6   10.22    1.52
  -4 -13   3  141.38    2.42
  -2 -13  -4   42.68    2.10
  -1 -12  -5    6.33    1.71
   1  -9  -6   19.77    1.08
  -7 -13   6    4.52    1.63
  -4 -14   0   61.71    2.24
  -3 -13   1  152.79    2.53
  -2 -12   1   66.54    1.85
  -1 -10   2  134.75    1.75
 -10 -14   6    1.63    1.38
  -6 -13   5    4.45    1.70
  -5 -13   4   37.66    1.77
  -4 -14  -4    5.27    1.77
  -3 -13  -6   35.78    2.06
  -3 -11   4   78.70    1.70
  -2 -12  -7    0.04    1.45
   0 -10  -7    1.93    1.24
   1  -9  -5  513.43    2.82
   1  -9  -4   13.39    0.90
  -9 -13   7    0.29    1.43
  -7 -14   4    1.92    1.53
  -7 -12   7   31.03    1.72
  -6 -14   3   11.51    1.70
  -5 -14  -5   21.05    2.03
  -5 -10   7   73.78    1.60
  -4 -14  -2  118.07    2.86
  -4 -12   4  253.98    2.73
  -1 -11   0   63.02    1.60
   1  -8  -7  532.19    2.73
  -7 -15  -2   46.75    2.32
  -7 -15   0    8.88    1.96
  -6 -12   6    1.88    1.54
  -6 -11   7   24.47    1.53
  -5 -12   5   18.02    1.66
  -4 -11   5   13.57    1.48
  -3  -8   6   86.29    1.29
  -2 -11   2    0.68    1.25
  -9 -15   2   15.92    1.77
  -8 -15  -2    3.18    1.61
  -8 -15   1    3.39    1.91
  -5 -13  -7   41.07    1.77
  -5 -11   6    9.13    1.38
  -3 -13  -5    1.91    1.64
  -3 -12   2   81.92    2.13
 -10 -13   7   29.68    1.60
  -9 -15   1   11.91    2.08
  -8 -15  -1   86.04    2.58
  -6 -14   2   75.58    2.22
  -5 -14   0    0.80    1.83
  -3 -13  -4    3.94    1.96
  -1 -11  -1    6.66    1.26
 -10 -14   5   13.79    1.58
  -9 -15   0    6.49    1.87
  -5 -14  -1   31.44    2.43
  -5 -13   3   -0.56    1.56
  -4 -13  -6    4.12    1.63
  -3 -13  -2   65.29    2.15
  -1  -9   2  155.69    1.65
 -11 -14   5    8.18    1.46
 -11 -13   7    2.91    1.29
  -7 -14  -5   29.16    1.59
  -7 -13   5   39.94    1.76
  -5 -14  -2   -0.82    1.88
  -2 -12  -5   35.69    1.73
  -2 -12  -2   87.06    2.23
  -1 -11  -2  231.87    2.46
  -6 -14  -4   19.36    1.93
  -6 -14   1    6.02    1.83
  -3 -12   1   18.81    1.59
  -3 -10   4   93.83    1.66
  -2 -11   1  104.02    1.85
  -1 -11  -4   14.02    1.52
   0  -9  -1  396.70    2.46
  -9 -14   4   -0.38    1.56
  -9 -13   6   87.79    2.14
  -7 -14   2    1.25    2.00
  -5 -12   4   11.40    1.71
  -4 -13  -5   15.87    1.79
  -4 -13   0   40.57    1.99
  -4  -9   6  210.54    1.96
  -2 -11  -7    1.99    1.51
  -1 -10   0  264.82    2.28
  -7 -14  -4    2.17    1.66
  -6 -14  -2   55.10    2.65
  -6 -14  -1    1.00    2.28
  -6 -14   0    3.69    1.92
  -6 -12   5  108.34    2.19
  -5 -13   2   10.94    1.70
  -5  -9   7    2.36    0.89
  -4 -11   4  252.71    2.53
 -11 -14   4    6.59    1.53
  -8 -14  -4   57.25    1.85
  -8 -13   5   23.37    1.82
  -6 -13   3    2.41    1.89
  -4 -12  -7   29.04    1.87
  -4 -10   5    8.13    1.07
  -3 -12   0   19.81    1.87
  -2 -10   2  294.46    2.39
   0  -9  -2   18.36    0.93
  -8 -14   2  107.56    2.67
  -7 -14   1    3.86    1.84
  -6 -11   6   31.14    1.41
  -6 -10   7   45.28    1.38
  -5 -11   5   26.81    1.38
  -4 -13  -2   42.85    2.08
  -4 -12   2  155.99    2.37
  -1 -10  -1    5.77    1.21
  -1  -9   1    4.43    0.84
  -7 -14   0    1.63    1.96
  -5 -13   1    9.59    1.77
  -3 -12  -1  353.27    3.40
  -3 -11   2  683.90    3.83
   0  -9  -4    5.36    0.86
  -8 -14   1   -2.66    2.15
  -8 -13  -6    1.08    1.18
  -2 -11  -1  174.14    2.24
  -9 -14   2    6.87    1.80
  -9 -13   5   29.31    1.71
  -8 -14  -2   98.13    2.64
  -8 -14   0   53.29    2.75
  -8 -12   6   41.49    1.67
  -5 -13  -4   13.12    1.88
  -5 -12   3   19.17    1.61
  -4 -12  -6  183.47    2.74
  -3 -12  -4    8.92    1.64
  -3 -12  -2   25.25    1.72
  -1 -10  -5   15.05    1.33
  -1 -10  -2    1.17    1.02
   0  -8  -7   42.94    1.17
 -11 -14   2   11.42    1.67
  -9 -14  -2    3.62    1.72
  -9 -14   1    5.83    2.27
  -8 -14  -1    3.47    2.06
  -7 -12   5    3.11    1.44
  -4 -12   1  302.26    3.06
  -4 -11   3   10.61    1.34
  -3 -11  -7    5.58    1.62
  -1  -9   0  360.56    2.35
 -10 -14  -1   -0.19    1.59
 -10 -14   1    2.09    2.08
 -10 -13   5    8.09    1.70
  -9 -14  -1   19.20    2.18
  -9 -14   0    2.63    2.22
  -8 -11   7   38.14    1.70
  -6 -12  -7   35.10    1.78
  -5 -13  -2   44.58    2.19
  -3 -11   1    6.27    1.30
 -10 -14   0   35.52    2.11
 -10 -11   8    1.21    1.38
  -8 -13  -5   23.04    1.72
  -7 -13  -5   71.29    2.09
  -6 -13  -4   73.47    2.58
  -6 -13   1  171.54    2.84
  -5 -11   4  579.00    3.71
  -2  -9   2   11.66    0.91
 -12 -13   5   12.19    1.54
 -12 -12   7    1.18    1.33
 -11 -13   5    6.67    1.50
  -9 -13   4   24.48    1.94
  -8 -12  -7   28.48    1.45
  -7 -13   2   89.05    2.57
  -7 -11   6   15.92    1.35
  -6 -11   5   13.73    1.50
  -5 -12   2   -0.92    1.49
  -4  -9   5    3.05    0.86
 -13 -12   7   17.99    1.36
  -8 -13   3   20.11    1.81
  -7 -10   7   18.19    1.27
  -6 -13  -1   68.69    2.73
  -5  -9   6  223.58    2.04
  -4 -12  -4   56.89    2.24
  -3 -11   0  168.62    2.24
  -1  -9  -1  135.89    1.60
  -6 -13  -2   10.36    2.04
  -6 -10   6   28.31    1.27
  -4 -11  -7   83.31    2.12
  -3 -10   2  114.38    1.71
  -9 -13  -4   32.67    1.75
  -9 -11   7    3.01    1.52
  -7 -13   1    4.30    1.90
  -5 -12   1    5.93    1.63
  -3 -11  -5    1.34    1.62
  -3 -11  -1   58.56    1.90
  -2 -10  -1    6.56    1.23
 -12 -13   4    1.13    1.46
  -9 -13   3   11.79    1.75
  -8 -13   2    9.89    1.83
  -7 -13   0  131.98    2.87
  -9 -12  -6    1.78    1.32
  -7 -13  -2  114.23    2.88
  -7 -13  -1    3.23    2.08
  -5 -11   3  193.06    2.38
  -3 -11  -2   18.35    1.48
  -2  -9   1  182.36    1.78
 -13 -12   6   -0.77    1.30
 -12 -12   6   24.57    1.67
 -10 -13   3   48.56    1.99
  -9 -13   2   52.01    2.46
  -8 -13   1   16.01    2.06
  -6 -11   4   66.88    1.95
  -3 -10  -7    3.98    1.47
  -3 -10   1   65.81    1.62
  -2 -10  -4   54.08    1.64
 -10 -11   7   33.42    1.73
  -8 -13  -2    0.95    2.05
  -8 -13  -1   59.97    2.94
  -8 -12   4  135.61    2.38
  -8 -10   7   16.72    1.46
  -7 -11   5   23.16    1.45
  -6 -12  -5   61.40    2.29
 -12 -13   1   45.06    2.09
 -12 -13   2    5.32    1.61
 -10 -13  -2    3.39    1.67
 -10 -13   2    6.04    1.85
  -9 -13  -2   28.23    2.07
  -9 -13   1   -0.66    2.01
  -6 -12   1   25.74    2.13
  -4  -9   4  219.39    1.96
 -11 -13  -1   -0.49    1.56
 -11 -13   1    1.67    2.07
 -10 -13   1   66.77    2.62
 -10 -12   5   23.66    1.64
  -6 -11  -7  174.62    2.56
  -6 -10   5   97.31    1.83
  -6  -8   7    1.53    0.89
  -5 -11   2  388.80    3.14
 -11 -12   5   58.06    2.09
 -10 -13   0   22.25    2.23
  -9 -12  -5   36.46    1.81
  -9 -11   6   57.38    1.92
  -8 -12  -5    6.54    1.81
  -7 -12   2   82.67    2.43
  -7  -9   7   22.45    1.18
  -6 -12  -4    7.62    1.87
  -5  -9   5    2.56    0.90
  -3  -9   2   36.88    1.20
 -14 -11   7   16.72    1.32
 -13 -12   5   13.15    1.43
 -12 -12   5    3.59    1.65
 -12 -11   7    4.54    1.49
  -8 -12   3   49.98    1.99
  -7 -11  -7   30.91    1.57
  -6 -11   3  302.33    3.02
  -4 -11  -4    9.44    1.59
  -4 -10   2  240.54    2.30
  -8 -11   5   50.80    1.70
  -7 -12  -4  152.32    2.95
  -7 -11   4   25.34    1.77
  -6 -12  -2    6.95    1.93
  -4 -11  -2    4.70    1.47
  -9 -10   7    5.26    1.45
 -13 -12   4    6.01    1.48
 -10 -12  -4    9.79    1.49
  -9 -12  -4    2.77    1.69
  -9 -12   3   52.75    2.05
  -8 -12  -4   47.80    1.98
  -8 -12   2   29.93    1.95
  -7 -12   0  338.49    3.91
  -3 -10  -4   57.73    1.74
 -12 -12   4   11.35    1.68
 -10 -11  -6    3.29    1.25
  -8 -10   6   26.70    1.50
  -7 -12  -1   -0.16    2.00
  -6 -11   2   16.74    1.78
  -5 -11   0  525.17    3.74
  -4 -10   1   25.48    1.29
  -3  -9   1   28.90    1.07
 -14 -11   6    2.79    1.32
 -11 -11   6  116.14    2.31
  -9 -11   5   10.60    1.66
  -7 -10   5    4.15    1.37
  -4 -10  -6   15.44    1.58
 -13 -12   2   45.47    1.92
 -13 -11   6   44.76    1.80
 -12 -11   6   23.15    1.69
 -11 -12   3   10.65    2.06
  -9 -11  -6   42.55    1.65
  -8 -12  -2   52.87    2.87
  -8 -11   4   43.09    1.74
  -8  -9   7   15.15    1.31
  -7 -11   3    0.08    1.44
  -5 -11  -1   67.80    1.98
  -5  -9   4  186.04    1.95
  -4  -8   4  361.71    2.20
 -12 -12  -1    8.31    1.61
 -11 -12  -2    0.02    1.66
 -10 -12   2  161.44    3.15
  -6 -11   1    7.43    1.83
  -4 -10   0   78.13    1.65
 -12 -12   0    5.12    1.80
 -12 -12   2   55.19    2.21
 -10 -12  -2   17.09    1.82
 -10 -11   5  203.67    2.75
  -9 -12   0   15.34    2.78
  -9 -12   1   45.10    2.39
  -7  -9   6  187.01    1.99
  -7  -8   7   61.90    1.34
  -5 -10   2   28.45    1.36
  -5  -8   5  157.34    1.63
  -4 -10  -5   13.37    1.44
  -3  -9   0   61.05    1.28
 -15 -10   7   34.84    1.41
 -14 -11   5    0.78    1.36
 -12 -12   1    9.04    1.88
 -11 -12  -1    0.99    1.79
 -11 -12   0   25.12    2.38
 -11 -12   1   26.35    2.49
 -10 -12  -1   33.89    2.56
 -10 -12   1    0.35    2.18
  -9 -10   6    4.34    1.42
  -6 -11  -4   80.72    2.28
  -6  -8   6   94.49    1.41
  -4  -9   2    5.84    0.94
  -3  -9  -6   10.52    1.14
 -11 -11   5   -0.05    1.66
 -10 -11  -5   37.44    1.64
  -9 -11  -5   25.73    1.85
  -9 -11   4   41.44    1.80
  -8 -11  -5    5.88    1.83
  -8 -11   3   17.56    1.93
  -6 -11   0   54.74    1.97
  -6 -10   3   13.88    1.31
  -5 -10  -6    0.86    1.37
 -14 -10   7   15.36    1.35
 -13 -11   5   25.65    1.69
 -12 -11   5   62.18    1.98
 -12 -10   7   92.87    2.01
  -8 -10  -7   11.39    1.55
  -8 -10   5   96.77    1.84
  -7 -10   4   38.80    1.67
  -5 -10   1  117.22    2.04
  -4 -10  -2   15.06    1.41
  -3  -9  -5   56.98    1.57
  -3  -9  -1   55.25    1.29
 -14 -11   4    2.36    1.50
 -11 -11  -4    4.65    1.49
  -9  -9   7   41.42    1.56
  -7 -11   1  171.05    2.64
  -3  -9  -4   16.05    1.13
  -3  -9  -2   41.27    1.24
 -15 -10   6   41.59    1.55
 -13 -11   4    4.47    1.60
 -12 -11   4    1.88    1.79
 -12  -9   8   11.65    1.44
 -11 -11   4   31.95    1.82
 -10 -11  -4    1.19    1.54
  -8  -9   6    2.44    1.22
  -7 -11   0  216.07    3.00
  -6 -10   2  406.72    3.15
  -5 -10   0   35.32    1.50
  -4  -9   1  551.58    3.01
  -2  -8  -4   24.24    0.96
 -14 -11   2    6.67    1.48
  -9 -10   5   77.17    1.94
  -7 -11  -1    7.33    1.91
  -7  -9   5   37.62    1.42
  -6  -9   4  101.37    1.58
  -5 -10  -4   72.17    2.12
 -14 -10   6   54.40    1.76
 -12 -11  -2    4.16    1.59
 -10 -11   3   57.16    2.09
  -9 -10  -6    1.99    1.60
  -8 -11   1  266.16    3.25
  -8 -10   4   84.62    2.02
  -8  -8   7   74.40    1.51
  -5  -9  -7  100.78    1.93
  -5  -8   4  103.58    1.42
  -2  -7  -7  312.43    2.15
 -13 -11   0    5.89    1.67
 -13 -11   2   34.98    2.04
 -13 -10   6   20.94    1.65
 -12 -11   3   30.30    1.92
 -12 -10   6   31.84    1.84
 -11 -11   3    4.74    1.78
 -10  -9   7  103.68    1.83
  -8 -11   0    8.63    2.04
  -8 -10  -6   86.75    2.04
  -4  -9   0  113.91    1.62
 -15 -10   5    1.85    1.21
 -13 -11   1    2.50    1.72
 -12 -11  -1   96.99    2.40
 -11 -11  -2  131.45    2.46
 -10 -11   2    0.74    1.87
  -7  -8   6   12.24    0.91
  -7  -7   7   72.43    1.23
  -6 -10   1   45.23    1.62
  -6  -8   5  472.10    2.62
  -5  -9   2  353.07    2.52
  -4  -9  -5  237.28    2.51
  -3  -8   0  112.80    1.39
 -12 -11   0    0.41    2.00
 -12 -11   1    5.22    2.19
 -10 -11  -2    0.56    1.82
 -10 -10   5   42.64    1.68
  -9 -11  -1   14.94    2.37
  -9 -11   0   13.27    2.32
  -6 -10  -4   96.78    2.47
  -6  -9  -7  144.49    2.28
  -6  -7   6  394.02    2.20
  -4  -8   2   38.52    1.02
 -15  -9   7    3.71    1.27
 -14 -10   5   -0.94    1.54
 -12 -10  -4    2.75    1.37
 -11 -11   0   10.42    2.47
 -11 -11   1   49.57    2.47
 -11  -9   7   90.84    1.95
 -10 -11  -1    3.26    2.12
 -10 -11   0   10.88    2.36
 -10 -11   1   45.60    2.54
  -9 -10   4  169.74    2.53
  -9  -9   6   29.74    1.33
  -7 -10   2   12.46    1.44
  -6 -10   0  183.76    2.43
  -5  -9  -6   46.58    1.75
 -13 -10   5   54.31    2.06
 -11 -10   5   46.62    1.78
  -9 -10  -5    6.10    1.74
  -9  -9  -7   35.91    1.60
  -8  -9   5    2.82    1.27
  -7  -9  -7    0.04    1.52
  -4  -9  -2   18.97    1.19
  -3  -8  -1   67.25    1.21
 -14  -9   7    7.13    1.45
 -13  -9   7   10.27    1.54
 -12 -10   5   17.50    1.59
 -12  -9   7   24.10    1.48
  -8  -9  -7   20.37    1.50
  -7 -10  -4   16.93    2.04
  -6 -10  -2   17.05    1.67
  -5  -9   1  237.47    2.18
  -3  -8  -5   51.88    1.24
 -11  -9  -6   13.57    1.42
 -10 -10   4  126.31    2.26
  -9  -8   7    8.77    1.04
  -3  -8  -4  188.19    1.89
 -13 -10  -2   17.99    1.55
 -10  -9   6   11.18    1.26
  -9 -10   3   34.29    1.75
  -8 -10  -4   16.05    1.96
  -8 -10   2    7.35    1.53
  -7 -10   0    0.42    1.87
  -6  -9  -6    8.50    1.35
  -4  -8   1  226.87    1.85
 -15  -9   6    6.59    1.31
 -14 -10   0   29.66    1.60
 -13 -10   4    6.12    1.56
 -11 -10   4    1.43    1.55
  -8  -8   6  170.06    1.89
  -7 -10  -1    5.46    1.71
  -6  -9   2    5.23    1.09
  -6  -8   4    2.98    0.93
  -5  -9   0    5.01    1.06
 -14 -10   1    1.22    1.49
 -14 -10   2   41.61    1.86
 -13  -8   8   28.47    1.52
 -12  -9  -5   12.28    1.38
 -11  -9   6   20.24    1.62
 -10 -10   3   57.45    2.25
 -10  -9  -6   10.14    1.58
  -9  -9   5  300.13    2.64
  -8 -10   1    4.13    1.93
  -7  -8   5   24.37    1.04
 -16  -8   7    9.12    1.23
 -14  -9   6    1.11    1.53
 -13 -10  -1   61.94    1.91
 -13 -10   3   85.01    2.21
 -13  -9  -4    2.01    1.25
 -12 -10  -2   12.49    1.63
 -10  -8   7   17.98    1.32
  -9 -10   2   40.45    1.91
  -8  -9  -6    1.36    1.56
  -8  -9   4   10.22    1.24
  -8  -7   7  112.40    1.42
  -5  -9  -1   47.67    1.47
 -13 -10   0    5.75    1.60
 -13  -9   6   33.04    1.65
 -12 -10   3   46.37    2.07
 -12  -9   6    6.62    1.35
 -11 -10   3   95.19    2.35
  -8 -10  -1   24.52    2.10
  -8 -10   0  159.83    2.77
  -7  -7   6  148.39    1.54
  -6  -9  -5  208.18    2.56
  -6  -9   1  184.41    2.21
  -6  -7   5  128.01    1.41
  -4  -8   0  294.89    2.10
 -12 -10  -1    4.71    1.64
 -12 -10   2  139.44    3.00
 -11 -10  -2    1.31    1.67
 -11  -9  -5   29.53    1.68
 -10 -10   2   90.65    2.39
 -10  -9   5   96.75    1.99
  -5  -8   2   33.04    1.02
  -4  -8  -5   70.22    1.46
 -12 -10   1   10.60    2.01
 -12  -8  -6   39.02    1.44
 -11 -10  -1  212.66    3.38
 -11 -10   2    5.21    1.96
 -10 -10   1   13.99    2.59
 -10  -8  -7    2.80    1.32
  -9 -10  -1    3.45    2.18
  -7  -9  -5    3.38    1.65
  -6  -9  -4   54.13    1.82
  -4  -8  -1  417.76    2.51
  -3  -7  -6  274.10    2.05
 -15  -9   4    9.48    1.41
 -15  -8   7    9.99    1.28
 -14  -9  -2   43.56    1.55
 -14  -9   5   31.17    1.70
 -12  -9  -4   12.34    1.46
 -11 -10   0   28.37    2.29
 -11  -9   5   -0.02    1.53
 -11  -8   7   45.67    1.47
 -10 -10  -1   29.86    2.32
 -10  -9  -5    0.53    1.67
  -9  -9   4   66.84    1.73
  -7  -9   2  525.20    3.29
  -5  -8  -6   21.92    1.41
  -4  -8  -4  184.60    1.93
 -16  -8   6   69.18    1.73
 -15  -9   1   -0.14    1.39
 -12  -9   5  115.16    2.34
  -9  -9  -5   47.08    1.79
  -9  -8  -7   23.06    1.59
  -8  -9  -5    3.25    1.50
  -8  -9   3  107.88    1.89
  -8  -8  -7   33.74    1.69
  -8  -8   5  102.98    1.66
 -15  -9   2   13.94    1.49
 -14  -9  -1   31.88    1.69
 -14  -8   7   29.10    1.47
  -7  -9  -4  150.94    2.61
  -7  -8   4  314.02    2.30
  -5  -8   1  167.16    1.71
  -3  -7  -5    8.21    0.81
 -14  -9   4    1.61    1.51
 -11  -9  -4   31.62    1.66
 -11  -8  -6    5.45    1.46
 -10  -9   4  234.32    2.62
 -15  -8   6    1.30    1.46
 -14  -9   0    4.05    1.58
 -14  -9   3   19.53    1.88
 -13  -9  -2   61.80    1.89
 -13  -9   4   46.32    2.12
 -11  -9   4  150.29    2.51
 -10  -9  -4    4.69    1.73
  -9  -9   3  269.74    2.74
  -8  -9   2    0.71    1.32
  -7  -9   0   17.42    1.74
  -5  -8  -5  308.81    2.61
 -14  -9   2   44.10    2.08
 -12  -9   4   46.81    1.89
  -9  -9  -4   83.12    2.11
  -8  -7   6   28.12    1.07
  -7  -9  -2  147.69    2.45
 -16  -8   4    2.97    1.32
 -13  -9  -1   13.63    1.57
 -11  -8   6   11.10    1.44
 -10  -9   3   89.44    2.29
 -10  -8  -6   53.12    1.71
  -9  -8   5   67.75    1.60
  -7  -8  -6    6.56    1.44
  -7  -7   5   47.88    1.13
  -4  -7  -6    0.77    0.95
  -3  -6  -7  231.46    1.84
 -16  -8   2   35.07    1.58
 -16  -7   7    5.14    1.26
 -14  -8   6    2.59    1.41
 -13  -9   0   19.54    2.03
 -13  -8  -4   10.80    1.33
 -12  -9  -2    3.55    1.55
 -11  -9   3   34.55    2.17
 -10  -7   7   16.23    1.17
  -9  -9   2    3.67    1.51
  -9  -8  -6   18.32    1.67
  -8  -8   4    6.06    1.19
 -13  -9   2   47.75    2.07
 -13  -8   6    5.55    1.34
 -12  -8   6   80.77    1.79
  -8  -9  -1   31.41    1.99
 -12  -9  -1   32.22    1.93
 -11  -9   2   18.49    2.32
 -10  -9  -2   63.86    2.50
 -10  -8   5   58.47    1.66
  -9  -9  -2  121.61    2.66
  -6  -8   1  233.97    2.08
 -15  -8   0   13.32    1.48
 -15  -8   4    4.02    1.55
 -14  -8  -2   27.65    1.48
 -14  -8   5   37.60    1.87
 -12  -9   1   61.41    2.41
 -12  -7  -6    0.75    1.17
 -11  -9  -1   14.81    1.99
  -9  -9   0   27.31    2.15
  -6  -8  -4   10.85    1.57
  -6  -7  -7   15.45    1.37
 -16  -7   6   43.28    1.56
 -13  -7  -5    8.54    1.28
 -11  -9   1   11.51    2.15
 -11  -7   7    1.50    1.07
 -10  -9  -1    1.81    2.03
  -9  -7   6   97.77    1.45
  -7  -8   2    2.58    1.01
  -6  -8   0   51.22    1.34
 -17  -6   7    9.24    1.20
 -15  -8   1    5.54    1.47
 -15  -8   2   14.75    1.60
 -14  -7  -4   20.05    1.25
 -14  -7   7    1.38    1.37
 -13  -8   5    6.09    1.47
 -12  -7   7   69.77    1.71
  -9  -7  -7   54.85    1.65
  -8  -7  -7   18.18    1.50
  -7  -7  -7   28.09    1.54
  -4  -7  -4  348.18    2.30
 -14  -8  -1    1.66    1.43
 -14  -8   4   58.86    1.91
 -13  -7   7   37.26    1.61
 -11  -7  -6   26.52    1.60
  -8  -7   5    2.43    0.82
  -7  -8  -4   11.08    1.71
  -7  -7   4   12.16    0.92
  -6  -8  -2  266.72    2.48
  -6  -8  -1  299.30    2.50
  -4  -6  -7   30.67    1.13
 -16  -7   5   34.13    1.56
 -13  -8  -2    6.28    1.67
 -10  -8   4  377.14    2.98
 -16  -7   0    0.58    1.15
 -15  -7  -2   36.27    1.40
 -15  -7   6    0.89    1.32
 -14  -8   0    2.38    1.44
 -13  -8   4    1.49    1.53
 -10  -8  -4   59.73    1.88
  -8  -8  -4  165.97    2.43
  -8  -8   2   84.87    1.83
  -5  -7  -5    3.01    1.11
 -17  -6   6   18.71    1.32
 -16  -7   1    7.45    1.36
 -12  -8   4  164.08    2.46
  -9  -8  -4    0.07    1.44
  -7  -8   0   66.56    1.61
 -16  -7   2   22.56    1.51
 -16  -6   7   48.39    1.53
 -14  -7   6    4.85    1.53
 -13  -7  -4   21.66    1.46
 -12  -8  -2  153.46    2.54
 -11  -7   6    5.04    1.24
 -11  -6  -7  102.82    1.89
  -8  -6   6  520.03    2.51
  -7  -8  -2   40.78    1.68
  -6  -7   2  101.72    1.33
  -5  -7   0   44.82    1.04
 -15  -7  -1    8.17    1.33
 -15  -7   5    2.88    1.58
 -13  -7   6    4.23    1.44
 -12  -8   3   80.97    2.42
 -12  -7   6   13.33    1.40
 -10  -8   3   24.49    1.55
  -8  -8   1   43.58    1.57
  -8  -7  -6   16.83    1.51
  -5  -7  -4   27.38    1.11
 -17  -6   5   29.33    1.44
 -13  -8   1  178.03    2.83
 -11  -8  -2    6.27    1.67
 -10  -6   7  106.32    1.54
  -8  -8  -2   50.02    2.02
  -8  -7   4  114.73    1.51
  -5  -7  -1   73.01    1.25
 -15  -7   0   20.57    1.60
 -12  -8   0  375.08    3.74
 -12  -8   2   24.06    1.96
 -10  -8   2    3.82    1.58
  -9  -8  -2    2.85    1.73
  -5  -7  -2  245.42    2.00
 -17  -6   4    0.23    1.13
 -16  -6   6   22.96    1.45
 -15  -6   7   38.77    1.49
 -14  -7   5   11.16    1.45
 -13  -6  -5    4.32    1.29
 -11  -8  -1    6.76    1.84
 -10  -8   1  139.61    2.96
 -10  -7   5    8.80    1.10
  -6  -7   1  203.62    1.79
 -15  -7   1   13.92    1.44
 -11  -8   0   82.61    2.48
 -10  -8   0  878.79    5.49
  -7  -7  -5   29.10    1.40
  -6  -7  -4   20.99    1.23
  -4  -6  -5   69.46    1.16
 -14  -7  -1    3.59    1.37
 -14  -7   4   45.25    1.93
 -14  -6   7    1.92    1.23
 -13  -7   5    6.13    1.39
 -12  -7   5   60.62    1.79
 -11  -7   5   26.38    1.32
  -9  -7  -5   10.59    1.39
  -9  -7   4    3.49    1.01
  -8  -7  -5  152.32    2.15
  -8  -6  -7    4.61    1.33
  -7  -7   2   84.50    1.36
  -7  -6  -7   17.10    1.35
  -6  -7   0   28.70    1.05
 -16  -6   0    4.82    1.29
 -15  -6  -2    0.28    1.27
 -13  -7  -2   79.63    2.16
 -13  -6   7    8.56    1.22
 -12  -6   7   20.77    1.20
 -11  -7  -4   43.64    1.69
 -15  -6   6   34.78    1.70
 -14  -7   0   19.04    1.61
 -14  -7   3   10.82    1.61
 -14  -5  -5   20.11    1.16
  -7  -7  -4   24.47    1.40
  -6  -7  -1  273.14    2.22
 -17  -5   6    4.42    1.28
 -16  -6   4   62.62    1.88
 -14  -7   1  134.93    2.41
 -13  -7   4   43.77    1.78
 -12  -6  -5   -1.40    1.30
 -10  -7  -4   57.90    1.78
  -9  -5   7    1.21    0.73
  -7  -7   1   46.38    1.24
 -16  -5   7   21.99    1.37
 -13  -6  -4    1.93    1.30
 -12  -7   4   68.44    1.86
 -11  -5  -7   48.89    1.59
 -10  -6  -6    3.78    1.27
  -9  -7  -4   17.85    1.51
  -8  -7   2   11.16    1.08
  -6  -6  -6  190.34    2.02
  -5  -6  -5  148.81    1.72
 -17  -5   5   28.58    1.47
 -15  -6  -1    5.48    1.39
 -15  -6   5   38.45    1.77
 -14  -6   6    5.79    1.28
 -13  -7   0  206.64    3.01
 -13  -7   3   14.19    1.68
 -12  -7  -2   21.55    1.67
  -7  -7  -2   28.02    1.59
 -18  -4   6    1.03    0.97
 -17  -5   1    5.25    1.13
 -13  -7   1   22.12    1.87
 -13  -7   2    1.26    1.67
 -12  -7   3   37.63    1.82
 -11  -6   6    8.73    1.04
  -9  -6  -6    1.53    1.18
  -8  -6  -6   10.84    1.34
 -17  -5   2    3.77    1.15
 -17  -5   4    1.98    1.15
 -15  -6   0   13.92    1.40
 -15  -6   4   99.85    2.19
 -14  -6  -2   30.63    1.51
 -12  -7  -1    3.38    1.64
 -10  -5  -7   43.10    1.62
  -9  -7   2  598.14    3.51
  -9  -6   5   61.31    1.19
  -8  -7   1   42.98    1.41
  -5  -6  -4    6.04    0.96
 -18  -4   5    1.25    1.11
 -16  -5  -1    2.77    1.16
 -16  -5   6   12.16    1.44
 -15  -6   1   97.27    2.20
 -15  -5   7    6.23    1.39
 -14  -6   5    4.69    1.61
 -14  -5  -4   26.28    1.40
 -12  -7   0    1.53    1.74
 -12  -7   1  143.13    2.67
 -12  -7   2  220.81    2.92
 -10  -7  -2   21.81    1.71
 -10  -7   2  154.44    2.49
  -8  -7   0  244.03    2.55
 -17  -4   7   42.02    1.43
 -15  -6   2    6.83    1.48
 -15  -6   3   54.48    1.78
 -11  -7  -1   73.79    2.16
 -11  -7   2  147.54    2.50
  -9  -7   1   52.92    1.76
 -15  -4  -4    2.65    1.15
 -14  -6  -1   18.69    1.54
 -14  -5   7  191.28    2.28
 -13  -6   5    4.05    1.55
 -10  -7  -1   14.56    1.80
 -10  -7   1   34.15    1.95
 -10  -6   5    2.56    0.95
  -9  -7  -1   42.60    1.96
  -9  -5  -7    1.60    1.31
  -7  -6  -5  275.99    2.47
 -16  -5   5    6.82    1.34
 -15  -5  -2   40.78    1.55
 -14  -6   4    6.19    1.44
 -14  -4  -5    5.10    1.09
 -13  -6  -2    5.15    1.71
 -13  -3  -7   19.28    1.13
 -12  -6   5   99.88    1.93
 -11  -6  -4    2.53    1.53
 -11  -5  -6    3.17    1.41
 -11  -5   7    3.82    1.02
  -9  -6  -5  169.64    2.20
  -8  -6  -5   10.42    1.39
  -8  -5  -7   32.89    1.45
 -17  -4   6   19.61    1.38
 -16  -5   1   33.22    1.63
 -15  -5   6   44.61    1.69
 -15  -4   8   25.02    1.38
 -14  -6   0  112.01    2.20
 -14  -6   3   16.69    1.87
 -13  -5   7  183.02    2.16
  -9  -6   4   55.17    1.30
  -7  -5  -7   28.64    1.22
  -6  -6  -4  100.61    1.56
 -16  -5   2    6.13    1.50
 -16  -5   3    9.14    1.53
 -16  -4  -2   37.02    1.34
 -14  -6   1   26.19    1.72
 -14  -6   2    3.54    1.56
 -13  -6   4   14.86    1.73
 -13  -5  -4   29.43    1.61
 -12  -5  -5   65.70    1.72
  -7  -6   2   34.73    0.97
  -6  -6   0  505.77    2.59
 -18  -3   6    0.36    1.09
 -17  -4   1   32.78    1.42
 -16  -4   7   18.45    1.41
 -15  -5  -1    6.36    1.29
 -13  -6  -1    8.11    1.55
 -11  -4  -7    3.25    1.19
 -10  -6   4   23.53    1.33
 -10  -5  -6    3.37    1.38
 -17  -4   5    1.01    1.19
 -15  -5   5    3.32    1.52
 -14  -5   6    2.47    1.43
 -12  -6  -2    3.40    1.48
 -12  -6   4   80.92    1.83
  -9  -6  -4   13.17    1.37
  -8  -6  -4   73.67    1.65
  -6  -6  -2  203.80    1.89
  -6  -6  -1   56.99    1.19
 -18  -3   5    1.28    1.10
 -17  -4   2    1.59    1.18
 -17  -4   4   35.46    1.43
 -15  -5   0   98.88    2.15
 -14  -5  -2    5.98    1.56
 -13  -6   1   24.23    2.07
 -12  -4  -6    4.19    1.30
 -10  -5   6    2.57    0.85
  -7  -6   1    7.59    0.87
 -18  -3   4    3.65    1.11
 -16  -4  -1   57.10    1.54
 -13  -5   6   76.29    1.74
 -12  -6  -1   28.19    1.74
 -12  -6   3   97.91    2.06
  -9  -5  -6   70.46    1.58
  -8  -6   2   20.10    1.02
 -17  -3   7   10.28    1.23
 -16  -4   6   33.34    1.45
 -15  -5   1    3.97    1.41
 -15  -5   3   10.74    1.69
 -12  -6   0   97.34    2.44
 -12  -5   6   53.87    1.47
 -12  -3  -7    5.47    1.20
 -11  -6   3   39.71    1.61
 -11  -5   6   45.39    1.19
 -10  -6   3   96.98    1.72
 -10  -4  -7    5.45    1.34
  -8  -5  -6   18.10    1.17
  -7  -6  -1  469.10    2.99
  -7  -6   0   29.55    1.11
  -5  -5  -5  123.22    1.43
 -16  -4   0  157.31    2.23
 -15  -5   2    8.90    1.46
 -14  -5  -1   70.57    2.07
 -14  -5   5   13.60    1.38
 -13  -3  -6    3.42    1.25
 -12  -6   1  101.81    2.31
 -12  -6   2   39.80    1.82
 -10  -6  -2   22.95    1.81
  -8  -6   1   21.44    1.16
 -18  -2   7   20.27    1.18
 -17  -3   0  114.56    1.82
 -16  -4   5   15.19    1.49
 -15  -4  -2    8.00    1.30
 -14  -3  -5   44.46    1.40
 -14  -2  -6    1.20    1.02
 -13  -2  -7    3.69    1.05
 -11  -6   2   51.48    1.81
  -8  -6  -2   45.33    1.59
  -8  -6   0  531.18    3.41
 -16  -4   1   49.61    1.74
 -16  -3  -2    2.93    1.18
 -14  -5   0   43.00    1.97
 -14  -5   4   58.19    1.95
 -14  -4   7   28.93    1.45
 -13  -5  -2   41.27    1.88
 -13  -5   5   14.45    1.49
 -11  -6   0    0.90    1.61
 -11  -6   1   35.95    1.87
 -11  -4  -6    6.24    1.42
 -10  -6  -1   43.54    1.81
  -9  -6  -1   15.82    1.77
  -9  -4  -7   12.57    1.33
  -8  -6  -1    5.21    1.30
 -16  -4   2    3.88    1.48
 -11  -5  -4   14.32    1.38
  -9  -5  -5   11.92    1.23
  -8  -5   4   69.85    1.06
 -18  -2   6   11.36    1.06
 -17  -3   1   25.26    1.32
 -16  -4   3   38.49    1.54
 -15  -4  -1   24.70    1.43
 -14  -5   1    2.79    1.51
 -14  -5   2   33.18    1.72
 -14  -5   3   47.91    1.76
 -13  -4  -4   26.74    1.41
 -13  -4   7    9.21    1.20
 -12  -5   5   46.98    1.40
 -11  -3  -7    3.03    1.28
  -8  -4  -7    5.99    1.21
  -7  -5  -5    4.75    0.97
 -17  -3   5   23.39    1.36
 -16  -3   7    4.69    1.16
 -13  -5  -1   28.19    1.65
 -13  -5   4   33.36    1.55
 -18  -2   5   18.52    1.14
 -17  -3   4   42.31    1.49
 -16  -3  -1    1.98    1.21
 -12  -5  -2    4.56    1.66
  -6  -5  -4  101.44    1.43
 -14  -4  -2   60.29    1.72
 -14  -3  -4    1.22    1.20
 -13  -5   0   78.90    2.01
 -13  -5   3  124.23    2.16
 -13  -3  -5    1.93    1.32
 -12  -5   4   21.92    1.39
 -12  -3  -6    2.32    1.17
  -9  -5  -4  139.13    2.06
 -15  -4   1   34.81    1.82
 -15  -2  -4   23.16    1.21
 -13  -5   1   83.81    2.07
 -13  -5   2  119.29    2.22
 -12  -2  -7    3.38    1.19
  -8  -5  -4    9.72    1.10
  -7  -5  -4   26.74    1.10
 -17  -2   0    3.41    1.14
 -16  -3   0   26.89    1.40
 -15  -4   2    2.21    1.38
 -15  -4   3    6.88    1.40
 -15  -3  -2   30.44    1.56
 -14  -1  -6    6.97    1.03
 -13  -4   6    4.55    1.25
 -13  -2  -6   11.31    1.27
 -12  -5  -1  129.45    2.21
 -12  -5   3   87.97    2.07
 -11  -5  -2   14.51    1.68
 -10  -3  -7  132.35    1.97
  -9  -4  -6   24.54    1.22
 -16  -2  -2    3.67    1.11
 -14  -4  -1   10.21    1.44
 -14  -4   5    7.55    1.44
 -10  -4   6  147.82    1.50
  -6  -4  -6   50.90    1.16
 -17  -2   6    2.93    1.27
 -16  -3   1   25.91    1.41
 -12  -5   2    8.98    1.50
 -11  -5   3   13.44    1.31
 -11  -4   6    2.80    0.92
  -8  -5   2  165.50    1.62
 -18  -1   6   14.37    1.09
 -17  -2   1    0.94    1.15
 -16  -3   2   14.47    1.57
 -16  -3   4  105.45    1.90
 -14  -4   0   26.85    1.61
 -14  -4   4    7.63    1.58
 -13  -4  -2    5.02    1.39
 -11  -5  -1   12.63    1.49
 -11  -3  -6   48.34    1.50
 -10  -5  -2    1.44    1.29
 -10  -4  -5    1.01    1.16
 -18  -1   5   30.75    1.27
 -17  -2   2    0.67    1.25
 -17  -2   5   20.44    1.43
 -17  -1  -1    0.20    0.98
 -15  -3  -1    4.18    1.27
 -15  -3   6   94.67    1.86
 -14  -4   1   69.20    2.10
 -11  -5   0  132.46    2.24
 -11  -5   1  243.67    2.74
 -11  -4  -4    9.09    1.29
  -9  -5  -2  155.56    2.08
  -9  -5   2    5.81    1.01
  -9  -3  -7   52.42    1.42
  -7  -5  -1  226.40    2.06
  -7  -5   0  168.53    1.73
 -18  -1   4   20.43    1.18
 -17  -2   4    9.21    1.27
 -16  -2  -1   -0.32    1.21
 -16  -2   7   40.88    1.39
 -14  -4   2   59.21    1.83
 -14  -4   3    0.29    1.37
 -11  -2  -7   74.72    1.69
 -10  -5   1  327.01    2.92
  -9  -4   5  146.22    1.42
  -8  -5  -1  135.27    2.07
 -15  -1  -4   53.66    1.45
 -14  -2  -4   15.15    1.38
 -13  -4  -1  284.20    2.86
 -12  -4   5   36.37    1.40
  -9  -5  -1    1.96    1.27
  -5  -3  -7   51.78    1.04
 -17  -1   7    1.32    1.09
 -15  -3   0   46.00    1.64
 -15  -3   5    4.78    1.26
 -14  -3  -2   18.53    1.43
 -13  -4   4    4.54    1.26
 -13  -2  -5   25.78    1.52
 -13   0  -7   68.64    1.42
 -12  -4  -2   29.92    1.72
 -12  -2  -6   28.02    1.35
 -12  -1  -7   94.50    1.68
 -11  -4   5   98.63    1.58
 -10  -4  -4   32.62    1.59
 -10  -3  -6   10.68    1.29
 -10  -3   7    2.99    0.62
  -8  -4  -5    2.21    0.97
 -17  -1   0    4.96    1.07
 -15  -3   1   29.69    1.78
 -14  -3   6    9.05    1.30
 -14  -1  -5    0.88    1.08
 -14   0  -6    2.92    0.94
 -13  -4   0   99.25    2.05
 -13  -4   3   57.94    1.91
 -13  -1  -6    5.00    1.22
 -12  -3   7    6.20    0.91
 -11  -3   7    0.35    0.80
  -7  -3  -7   65.06    1.27
  -6  -3  -7    5.64    0.85
 -15  -3   2  102.98    2.18
 -15  -3   4  144.27    2.13
 -15  -2  -2   31.71    1.40
 -13  -4   1   23.98    1.61
 -13  -4   2   22.62    1.56
 -12  -4   4   11.96    1.40
 -11  -3  -5   19.68    1.34
 -18   0   2   32.57    1.27
 -18   0   6    6.93    1.15
 -17  -1   1   19.38    1.34
 -17  -1   6   38.11    1.43
 -16  -2   1   28.47    1.61
 -14  -3  -1   73.10    1.84
 -12  -4  -1    0.80    1.37
 -10  -2  -7   22.81    1.38
  -9  -4  -4    0.44    1.08
 -17   0  -1    1.26    0.98
 -12  -4   3    5.53    1.46
 -11  -4  -2    2.35    1.29
 -11  -4   4    3.48    1.03
  -9  -4   4   29.06    0.89
  -9  -3  -6  441.13    2.85
  -8  -4  -4    4.29    1.12
  -6  -4  -4   26.89    0.93
 -18   0   4    2.19    1.04
 -17  -1   2   60.67    1.60
 -17  -1   5   12.93    1.35
 -16  -2   2    9.78    1.32
 -15  -2  -1    7.12    1.52
 -14  -3   0   35.63    1.87
 -11  -2  -6   11.20    1.34
 -10  -4   4   66.20    1.25
 -17  -1   4    9.96    1.24
 -16  -1  -1   28.29    1.38
 -14  -3   4  131.92    2.15
 -13  -3  -2   42.62    1.62
 -13  -2  -4   76.83    1.72
 -12  -4   1   44.76    1.70
 -12  -4   2  267.72    2.67
 -10  -3  -5  199.38    2.27
  -8  -3  -6   62.01    1.42
 -18   1   7   22.37    1.12
 -16  -1   7    1.83    1.11
 -15  -1   8   10.89    1.20
 -13   1  -7    0.97    0.98
 -12  -3   6   28.47    1.08
 -11  -4   3  177.24    2.07
 -11  -3  -4   54.88    1.75
 -11  -1  -7    2.94    1.26
 -10  -4  -2    4.38    1.21
 -14  -3   2   20.14    1.53
 -13  -3   5  135.91    1.87
 -12  -1  -6    0.53    1.28
 -11  -4   0    0.19    1.33
 -10  -3   6    3.58    0.64
  -6  -3  -6    0.01    0.68
 -16  -1   0   34.56    1.42
 -16   0  -2   43.40    1.39
 -15  -2   5   35.64    1.63
 -14  -2  -2   67.72    1.74
 -13  -3  -1   63.61    1.79
 -11  -4   1  113.03    2.00
 -10  -4  -1   11.79    1.29
  -9  -4  -2   -0.81    1.07
 -17   0   1   81.06    1.70
 -17   1  -1   -0.35    1.07
 -16  -1   6    4.71    1.36
 -15  -2   1   12.20    1.43
 -15  -1  -2   46.89    1.50
 -13  -2   7   41.18    1.28
 -10  -4   0  186.83    2.35
 -10  -4   2   94.23    1.65
 -10  -2  -6  139.78    1.95
  -9  -4   2    2.38    0.98
  -9  -3  -5    1.38    1.04
  -8  -4  -2  234.78    2.13
  -7  -4  -2   45.45    1.17
 -18   1   5   24.65    1.22
 -16  -1   1   43.61    1.70
 -15  -2   2   -0.29    1.55
 -13  -3   0   13.20    1.46
 -10  -4   1   30.65    1.40
 -10  -3  -4    9.80    1.38
  -9  -4  -1   14.22    1.20
  -8  -2  -7   33.96    1.16
 -15  -2   3   32.90    1.54
 -15  -1   7   40.09    1.46
 -13  -3   1    1.07    1.39
 -11  -2  -5   11.62    1.25
  -8  -4  -1  235.69    2.19
  -8  -4   1    1.14    0.93
  -8  -3  -5  166.51    1.77
 -16  -1   2    2.39    1.26
 -15  -1  -1   34.63    1.68
 -15   1  -4   53.48    1.42
 -12  -3  -1    6.93    1.58
 -12  -2   7   33.23    1.13
 -11  -3   5   58.27    1.21
  -7  -2  -7   29.11    1.12
 -17   1   0    3.98    1.06
 -14  -2   5   30.62    1.47
 -14   2  -6    1.34    0.86
 -12  -3   4   42.05    1.37
 -11  -2   7    7.51    0.83
  -6  -2  -7    7.69    0.82
 -16   1  -2    2.34    1.13
 -14  -2   0   27.85    1.56
 -14   0  -4    1.96    1.16
 -14   1  -5    2.27    1.14
 -13  -2   6    8.31    1.15
 -13  -1  -4   16.51    1.31
 -12  -3   0    1.94    1.54
 -11  -3  -2   10.75    1.28
  -9  -3  -4  147.13    1.81
  -9  -2  -6   10.50    1.04
 -17   1   7    1.61    1.02
 -16   0   0   -0.40    1.34
 -15  -1   0   15.86    1.62
 -15  -1   6   47.75    1.54
 -14  -2   1   11.08    1.67
 -14  -2   4    2.23    1.43
 -13   1  -6    4.06    1.21
 -12  -3   1    8.08    1.58
 -11  -3   4   51.72    1.36
 -14  -2   2   44.16    1.63
 -14  -2   3   20.21    1.65
 -14  -1  -2   39.07    1.54
 -14  -1   7   53.23    1.45
 -12  -3   2   17.31    1.36
 -11  -2  -4    4.35    1.42
 -10  -2  -5   12.11    1.17
  -8  -3  -4    0.94    0.85
 -18   2   4   14.71    1.09
 -17   1   6   27.83    1.39
 -13  -2  -1    9.20    1.40
 -11  -3  -1  100.47    1.80
  -9  -3   4  192.02    1.57
  -9  -1  -7   13.05    1.11
  -8  -2  -6   31.91    1.17
  -7  -3  -4   16.65    0.94
 -15  -1   1   -2.05    1.31
 -15  -1   5    2.58    1.19
 -15   2  -4   24.03    1.21
 -14   3  -6   -0.20    0.89
 -13  -2   5    2.08    1.04
 -11  -3   0   58.45    1.59
 -10  -3  -2    7.03    1.16
 -17   2   0    3.13    1.04
 -15  -1   2   24.04    1.49
 -15  -1   3    5.95    1.56
 -15  -1   4   27.92    1.43
 -13  -2   0   94.21    2.10
 -11  -3   1   19.86    1.34
 -10  -1  -6    5.42    1.21
 -17   1   4   21.65    1.35
 -16   0   4  103.16    1.99
 -16   2  -2    1.31    1.01
 -15   0  -1    5.28    1.27
 -12  -2  -2   27.97    1.45
 -12  -1  -4  212.23    2.34
 -11  -2   6    1.38    0.71
 -11  -1  -5    2.30    1.32
 -10  -3  -1   48.88    1.41
  -9  -2  -5  155.23    1.83
 -15   0   7    4.22    1.11
 -14   1  -4    2.07    1.16
 -13  -2   1   50.54    1.67
 -13  -2   3    0.73    1.45
 -13  -1   7   18.85    1.05
 -10  -2  -4   13.48    1.19
  -9  -3  -2  379.02    2.57
  -8  -1  -7   47.09    1.31
  -6  -2  -6   42.55    0.99
 -18   3   5    1.18    0.97
 -17   2   1    2.63    1.12
 -17   2   7   55.78    1.39
 -16   1   0   34.19    1.39
 -16   1   7    0.65    1.22
 -14  -1   0    2.09    1.61
 -13  -2   2  116.72    1.98
 -13   2  -6   10.66    1.25
 -10  -3   0   19.61    1.23
 -10  -3   1   43.00    1.37
 -15   1  -2   48.58    1.49
 -13  -1  -2    3.30    1.32
 -13   1  -5    2.18    1.20
 -12  -2  -1    4.06    1.30
 -12   1  -6   -0.62    1.26
 -11   1  -7    2.43    1.10
  -9  -3   2   19.45    0.97
  -8  -3  -2    5.22    0.89
 -17   2   6    3.16    1.17
 -17   3   0  101.04    1.60
 -15   3  -4   41.26    1.24
 -14  -1   1  134.98    2.14
 -14   0  -2    2.99    1.28
 -13   4  -7   10.12    0.91
 -12  -2   4  287.16    2.45
 -12  -1   7    4.76    0.95
  -9  -3   1  152.69    1.80
  -9  -1  -6    5.00    1.12
 -18   4   6    0.54    1.00
 -16   1   1   53.90    1.58
 -16   1   6    5.59    1.30
 -16   3  -2    4.18    1.08
 -13  -1   6   13.51    1.21
 -11  -2  -2   16.91    1.29
  -9  -2  -4   51.56    1.29
  -8  -3  -1  229.34    2.00
  -8  -3   0  164.60    1.86
 -15   0   1   12.73    1.48
 -14  -1   3   37.46    1.53
 -12  -2   1   14.70    1.35
 -12  -2   2  265.88    2.59
 -10  -1  -5  128.24    1.81
  -7  -2  -5  313.56    2.06
 -17   3   1   22.13    1.27
 -16   1   2    1.15    1.24
 -15   1  -1   36.38    1.64
 -11  -2  -1   55.66    1.69
  -9   0  -7  100.25    1.69
  -6  -1  -7   27.96    0.95
 -17   3   7    8.61    1.17
 -16   1   4    3.15    1.22
 -16   2   0   17.94    1.44
 -15   0   3    2.37    1.31
 -15   4  -4    4.70    1.01
 -13   3  -6    1.33    1.15
 -11  -2   4    0.85    0.88
 -15   2  -2   22.65    1.48
 -13   1  -4   22.16    1.53
 -12  -1  -2   15.04    1.35
 -12  -1   6    4.79    0.98
 -12   0  -4   10.50    1.27
 -11  -2   0   24.01    1.49
  -8  -2  -4   14.11    0.90
  -8  -1  -6   12.74    0.93
 -17   3   2    2.10    1.14
 -17   3   6    2.15    1.14
 -16   2   7   50.29    1.53
 -16   4  -2   47.93    1.25
 -15   1   0   19.72    1.65
 -14   0   6    6.04    1.24
 -11   0  -5  416.77    2.97
 -10  -2   4  246.55    1.93
 -17   3   5   26.02    1.44
 -14   0   0   50.91    1.69
 -14   1  -2   47.62    1.78
 -13  -1   1   34.57    1.54
 -13  -1   2    8.70    1.53
 -13  -1   3    1.20    1.38
 -13  -1   4  156.67    1.99
 -12   1  -5    2.12    1.19
 -11  -2   1   42.57    1.40
 -11  -2   2  224.66    2.18
 -11   1  -6   16.40    1.35
  -7  -2  -4  227.75    1.77
 -17   3   4   41.62    1.43
 -17   4   1   43.71    1.32
 -10  -2  -1    3.98    1.05
 -10  -1  -4   23.92    1.24
  -7  -1  -6    7.26    0.85
 -16   2   2    8.13    1.28
 -15   1   1    0.97    1.32
 -15   2   8    5.25    1.17
 -14   3  -4    1.57    1.21
 -13   4  -6    9.30    1.12
 -12  -1   5   30.99    1.25
 -11  -1   6   68.29    1.14
  -9  -2  -2    8.05    0.96
 -16   2   3    4.19    1.47
 -16   2   5   -0.78    1.31
 -16   3   0   30.52    1.36
 -15   2  -1    2.16    1.23
 -12   4  -7   15.82    1.15
 -10  -2   0    2.62    1.01
 -10  -2   2   57.48    1.41
 -16   2   4  178.61    2.20
 -15   1   2   14.39    1.41
 -15   1   5    6.99    1.22
 -15   3  -2   35.04    1.53
 -14   1  -1   65.49    1.94
 -13   0  -1   15.02    1.42
 -12  -1   0   21.05    1.38
  -8  -1  -5   69.16    1.36
  -6  -1  -6   23.19    0.90
 -17   5   1    5.10    1.00
 -15   1   4   29.42    1.43
 -14   5  -5   20.94    1.05
 -13   3  -5    4.41    1.18
 -12  -1   1   60.05    1.76
  -9  -2  -1   52.01    1.24
  -9   1  -7   17.17    1.27
 -17   4   4   31.09    1.33
 -17   4   5    0.73    1.12
 -16   3   7    8.61    1.16
 -15   2   0   16.43    1.40
 -12  -1   2   55.20    1.51
 -12   1  -4  202.19    2.30
 -12   3  -6    1.57    1.21
 -11  -1   5  406.15    2.45
 -11   3  -7    3.97    1.22
  -9  -2   0   32.70    1.12
  -9  -2   2  380.00    2.36
  -9  -1  -4  131.28    1.66
 -17   5   2    4.57    1.13
 -17   5   7    0.86    1.02
 -15   2   7   82.63    1.60
 -14   2  -2   74.86    1.93
 -13   5  -6    1.30    0.94
 -12   0  -2    2.72    1.27
 -12   2  -5    7.83    1.38
 -11  -1  -1   16.31    1.26
 -11   1  -5    1.79    1.33
 -10   2  -7    9.08    1.28
  -9  -2   1  103.89    1.50
 -16   3   6   27.86    1.45
 -16   4   0  123.22    1.87
 -16   5  -1    2.44    1.03
 -14   1   6   12.18    1.26
 -14   4  -4   48.78    1.43
  -8  -2  -1   16.69    0.94
  -7  -1  -5  185.10    1.68
 -16   3   3   34.62    1.65
 -15   2   6  105.08    1.86
 -15   3  -1    5.02    1.23
 -13   0   1  167.57    2.22
 -17   5   4    2.51    1.13
 -16   3   4  105.71    1.87
 -16   3   5   27.90    1.36
 -14   1   1  179.53    2.35
 -13   4  -5   50.13    1.54
 -13   6  -6   -0.29    0.96
 -10  -1   5   46.67    0.99
  -8  -1  -4  294.79    2.10
 -17   6   2    7.25    1.03
 -17   6   7    5.75    1.08
 -16   4   1   43.49    1.44
 -16   6  -1    6.36    1.09
 -15   2   2    0.94    1.32
 -14   1   2   16.50    1.65
 -14   1   5   43.70    1.40
 -11  -1   1    3.11    1.09
 -11  -1   2   19.97    1.17
 -10   0  -4    5.62    1.12
  -9   0  -5   37.15    1.23
 -16   4   7   20.02    1.35
 -16   5   0    9.09    1.24
 -15   2   3   28.71    1.50
 -15   2   4   65.26    1.68
 -15   3   0   46.58    1.80
 -14   1   4   29.77    1.41
 -13   1  -1   36.55    1.58
 -13   3  -4   19.25    1.33
 -12   4  -6    3.86    1.25
 -12   6  -7    0.97    1.00
 -11   4  -7    3.89    1.21
 -16   4   2    7.19    1.43
 -11   1  -4   20.51    1.54
 -10  -1   4  406.36    2.34
 -17   6   4    0.49    1.03
 -17   6   5   29.16    1.30
 -15   4  -1   49.94    1.53
 -15   5  -2   51.57    1.50
 -14   2   7   36.07    1.45
 -12   2  -4    3.35    1.24
 -12   3  -5   10.22    1.25
 -10   1  -5  119.46    1.90
  -9  -1  -2  179.42    1.81
  -9   1  -6   14.14    1.09
  -9   2  -7    7.47    1.24
  -7  -1  -4   78.95    1.18
 -14   2   0   25.64    1.55
 -13   1   0   35.34    1.58
 -13   1   6   26.01    1.16
 -13   5  -5    3.94    1.20
 -11   3  -6   52.15    1.49
 -10  -1   0   12.28    1.04
 -16   4   4    8.42    1.26
 -16   5   1   42.98    1.45
 -16   6   0    6.56    1.11
 -14   6  -4   12.56    1.13
 -12   0   2    8.28    1.40
 -17   7   5    3.67    1.07
 -15   3   2   98.04    1.96
 -15   6  -2    0.80    1.15
 -14   2   1   11.23    1.70
 -13   4  -4   26.06    1.55
 -12   1   7    4.46    0.88
 -12   5  -6    9.38    1.30
  -9  -1  -1   23.95    1.04
  -7   1  -7  194.67    1.84
 -16   5   2    4.92    1.18
 -16   7   0   -0.06    1.08
 -15   3   5    5.37    1.48
 -15   4   0    1.35    1.27
 -14   3  -1   97.98    1.97
 -13   1   5   74.53    1.51
  -6   0  -6  882.97    3.17
 -16   5   6   13.58    1.41
 -15   3   4  153.69    2.17
 -14   2   2   78.60    1.86
 -14   2   5   14.39    1.25
 -14   7  -4   16.06    1.10
 -13   1   2   11.01    1.35
 -13   1   3    2.39    1.46
 -13   6  -5    3.24    1.18
  -9  -1   0  298.92    2.23
  -8  -1  -2  446.32    2.47
 -16   5   4    0.76    1.34
 -15   7  -2   27.34    1.27
 -14   2   3   17.23    1.44
 -14   2   4    2.10    1.25
 -13   2  -1   12.88    1.46
 -12   3  -4    4.08    1.45
 -12   4  -5   32.38    1.43
 -10   1  -4   29.58    1.47
  -9  -1   2  409.07    2.46
  -8   1  -6   21.81    1.15
 -15   4   1   37.66    1.60
 -12   1   6   15.01    1.09
 -12   6  -6   54.46    1.53
 -11   4  -6    3.96    1.34
 -10   4  -7    2.39    1.29
  -9   1  -5   -1.39    1.00
  -7   0  -5   95.52    1.36
 -16   6   2   43.99    1.52
 -11   0   1   77.65    1.56
  -8  -1  -1  979.20    3.55
  -9   9   6   22.56    1.45
  -9  11   8   55.58    1.87
  -8   6   4   41.02    1.20
  -8  12  11   81.58    2.10
  -7  13  12    7.09    1.39
  -5   4  11  512.82    2.48
  -9   8   7   14.52    1.38
  -9   9   5  284.16    2.55
  -9  10   9   81.69    2.02
  -9  12   6  168.76    2.37
  -9  12   8    1.38    1.50
  -8   8  11   12.52    1.45
  -7   5  10   80.17    1.43
  -7   7   0  131.70    1.40
  -6   4  10   17.17    0.82
  -6  13  13   18.64    1.34
  -9   8   8   99.18    1.91
  -9   9   9  226.91    2.60
  -9  12   5  168.21    2.27
  -8  11   1  296.55    2.49
  -8  13   2    4.64    1.27
  -8  14   3   -0.05    1.25
  -8  14  10   52.92    1.73
  -8  15   5    0.76    1.27
  -7  10  13   11.82    1.58
  -7  16   3    9.31    1.09
  -9   8   5   89.55    1.66
  -9   9   4   69.10    1.59
  -9  10  10    2.79    1.79
  -9  12   9   17.05    1.59
  -9  13   7    1.66    1.39
  -9  13   8    7.18    1.66
  -8   5   6    2.21    0.97
  -8  11  12   27.18    1.76
  -8  13  11    4.83    1.42
  -7   9  13   21.09    1.60
  -7  11  13    0.45    1.30
  -9   9  10    4.65    1.49
  -9  13   5   32.56    1.70
  -8   5   5  222.86    1.86
  -8   5   7  395.19    2.40
  -8   6   3   56.79    1.11
  -8   7  11   18.89    1.36
  -8  12   1   20.14    1.38
  -8  15   4    1.43    1.17
  -7  12  13   17.10    1.48
  -7  14  12   50.32    1.52
  -9   7   6   92.54    1.63
  -9   7   8    6.83    1.27
  -9  12  10   17.85    1.54
  -8   5   8   17.49    1.01
  -8  12  12  151.31    2.22
  -7   4   9    6.01    0.78
  -7   8  13   71.11    1.83
  -6  11  14   61.83    1.60
  -9   7   5  178.25    1.93
  -9   9   3  277.03    2.45
  -9  11   3    1.51    1.21
  -9  13   4   16.24    1.59
  -9  14   6   19.61    1.63
  -8   8  12   32.71    1.54
  -7   5  11    5.22    1.05
  -7   6  12   37.20    1.37
  -6  12  14   39.75    1.37
  -9  11  11    1.22    1.43
  -8   5   4   57.60    1.09
  -8  15   3    5.63    1.13
  -7  13  13    0.38    1.07
  -6   4  11   96.87    1.37
  -9   8   3    5.45    1.16
  -9  12  11    2.04    1.34
  -9  14   5   34.57    1.54
  -9  14   9   65.04    1.81
  -8   6   2   21.63    0.98
  -8   6  11   12.01    1.31
 -10  10   7   -0.51    1.41
 -10  10   8    5.97    1.78
 -10  11   7   31.43    1.86
  -9   6   6  280.34    2.24
  -9   6   7  627.48    3.23
  -9   6   8   25.60    1.26
  -8   7   1   54.51    1.06
  -8   7  12    3.07    1.42
  -8  10  13   45.24    1.68
  -8  11  13    3.15    1.49
  -7   4  10   78.52    1.30
  -7   7  13   33.92    1.41
 -10   9   7  106.07    1.99
 -10   9   8  133.73    2.18
 -10  10   6   30.80    1.58
  -9   6   5   33.65    1.30
  -9  13   3   18.09    1.37
  -9  13  11  114.44    2.03
  -9  14   4   -0.87    1.36
  -9  14  10   19.03    1.44
  -8   5  10   18.81    1.07
  -8   9  13   18.05    1.41
  -8  12  13   14.07    1.43
  -7  10  14   26.39    1.48
  -7  11  14    4.38    1.20
 -10  12   7    4.64    1.40
 -10  12   8   30.07    1.59
  -9   6   9  143.67    1.90
  -9  10  12   16.44    1.52
  -9  15   6    5.16    1.27
  -9  15   8    2.28    1.24
  -8   4   6   22.51    0.91
  -8   4   7   15.18    0.89
  -7   9  14    5.85    1.35
 -10   8   8  119.05    2.04
 -10  10  10   21.37    1.64
 -10  11   5  184.70    2.28
 -10  12   9    3.64    1.40
  -9   7   3   68.27    1.32
  -9  12   2    3.40    1.23
  -9  15   5    3.50    1.23
  -8   4   5  227.95    1.74
  -8   4   8  135.81    1.50
  -8   8  13    1.54    1.24
 -10   8   6  186.27    2.19
 -10   8   9   40.77    1.68
 -10  12   5   26.73    1.45
 -10  13   8    4.70    1.31
  -9   8   2   13.69    1.17
  -9  14   3   66.79    1.64
  -8  13  13   33.09    1.31
  -7   5  12  549.88    2.90
  -7   8  14   14.11    1.45
 -10  11   4    2.41    1.46
 -10  13   6    0.85    1.33
 -10  13   9   15.35    1.44
  -9   5   7   -0.04    0.95
  -9  14  11   55.90    1.49
  -8   6   1   42.72    1.04
  -8   6  12   20.82    1.23
  -7   4  11  137.00    1.56
  -7   6  13  257.00    2.24
 -10   7   7   16.59    1.36
 -10   7   8  233.13    2.41
 -10   9   4  241.75    2.34
 -10  13   5    8.38    1.47
  -9   5   6   45.71    1.20
  -9  15   4    1.65    1.16
  -7   3   9  153.69    1.45
 -10   7   6  147.30    1.94
 -10   7   9    1.74    1.34
 -10   9  11   68.98    1.90
 -10  12   4   45.72    1.59
 -10  12  11   39.43    1.71
 -10  13  10   11.78    1.40
 -10  14   8    1.53    1.29
  -9   5   5  174.07    1.72
  -9   5   9    2.89    1.04
  -9  10   1   92.91    1.57
  -9  10  13    5.29    1.39
  -9  11  13    4.12    1.40
  -8   7   0  267.27    1.88
  -8  10  14   37.14    1.47
  -8  11  14   22.71    1.33
 -10   8   4  377.25    2.70
 -10  14   6    3.14    1.37
  -9   6   3  325.11    2.17
  -9   6  11  108.98    1.80
  -9   7   2  437.79    2.52
  -9   7  12   14.81    1.36
  -9   9   1    1.36    1.02
  -9   9  13  147.02    2.17
  -9  12  13   95.50    1.86
  -8   4  10    4.35    0.97
  -8   9  14    0.68    1.25
  -8  12  14   26.62    1.29
 -10   7   5   23.28    1.29
 -10   8  11    6.78    1.50
 -10  13   4    0.78    1.34
 -10  13  11    4.22    1.33
  -6   3  11  891.29    3.09
 -11  10   8    2.21    1.72
 -11  11   8   66.94    2.02
 -10   6   7  227.23    2.23
 -10   6   8  108.74    1.80
 -10   9   3   85.55    1.61
 -10  12   3    6.54    1.41
 -10  14   5   13.19    1.24
 -10  14  10    1.55    1.13
  -9   5   4   17.69    0.96
  -9  15   3    8.59    1.02
  -8   8  14   57.47    1.72
 -11  10   7    3.84    1.43
 -11  11   7    2.17    1.38
 -11  11   9   90.82    1.96
 -10   6   6  625.96    3.27
 -10   6   9   12.09    1.31
 -10   7   4  156.87    1.98
  -8   3   7  448.94    2.33
  -8   6  13    3.40    1.11
  -7   5  13   10.07    1.22
 -11  10  10    2.06    1.47
 -11  11   6  128.05    2.05
 -11  12   8   32.12    1.51
 -11  12   9    7.64    1.33
 -10   8  12    3.53    1.60
  -9   4   7   35.40    1.10
  -7   4  12   81.02    1.40
 -11   8   7   24.92    1.73
 -11   8   8   79.89    1.88
 -11   8   9   38.45    1.90
 -11   9  10  119.59    2.17
 -11  12   6   18.22    1.55
 -10   6   5    1.88    1.05
 -10   6  10   64.91    1.64
 -10  13  12    0.42    1.09
 -10  14   4   33.88    1.40
  -9   4   6  319.79    2.15
  -9   4   8   14.87    1.01
  -9   5  11   80.89    1.65
  -9   6   2   91.68    1.31
  -9   7  13   24.48    1.40
  -9  10  14    3.03    1.27
  -9  11  14    1.30    1.26
  -8   4  11   60.02    1.26
  -8   6   0  532.12    2.41
  -8   7  14   21.75    1.41
 -11  10   5   41.68    1.52
 -11  10  11    2.72    1.67
 -11  11   5    1.62    1.49
 -11  11  11   54.52    1.87
 -11  13   9   18.42    1.43
 -10  10  13    2.00    1.30
 -10  11   2    1.11    1.28
 -10  11  13  201.55    2.33
  -9   4   9  108.29    1.54
  -9   5   3   41.13    1.03
  -9   9  14   23.49    1.43
  -9  12  14    2.84    1.08
  -8   3   9  202.54    1.70
 -11   9   5   -0.29    1.23
 -11   9  11   27.40    1.63
 -11  13   6   27.28    1.53
 -10   5   7  152.03    1.95
 -10   7   3  103.61    1.66
 -10  12  13    3.97    1.19
  -7   3  11   78.54    1.26
 -11   7   7    2.12    1.54
 -11   7   8   71.02    1.76
 -11   7   9    1.02    1.64
 -11  12  11   10.46    1.38
 -10  12   2  159.76    2.00
  -9   8  14    2.50    1.30
 -11   8   5   11.07    1.29
 -11   8  11   57.25    1.79
 -11  10   4    0.69    1.42
 -11  10  12   21.35    1.70
 -11  11   4   34.26    1.62
 -10   8   2    3.64    1.11
  -9   4   4   24.73    1.04
  -9   4  10   26.19    1.14
  -9   6  13    9.43    1.36
  -8   3  10   31.53    1.07
  -8   5  13   74.55    1.57
 -11   7   6   12.29    1.32
 -11   7  10   46.27    1.69
 -11   9   4  110.38    1.92
 -11  11  12   31.98    1.52
 -11  13   5    2.87    1.29
 -11  14   7  136.99    1.84
 -10   5  10   16.36    1.27
  -8   4  12  723.06    3.27
  -8   6  14   71.44    1.61
 -11  12  12   54.65    1.55
 -11  14   6    1.11    1.11
 -10   5   5  166.20    1.78
 -10   6  12    5.24    1.47
  -9   5   2    8.45    0.89
  -9   6   1    2.70    0.86
 -12  10   8   12.41    1.67
 -12  10   9    9.21    1.67
 -11   6   7  562.16    3.40
 -11   6   8  127.38    1.96
 -11   6   9   21.17    1.67
 -11   7  11    4.52    1.43
 -11   8   4  306.28    2.58
 -10   6   3  153.96    1.69
 -10   7  13    5.60    1.33
 -10   9  14    9.17    1.42
  -9   4  11   10.54    1.05
  -9  10  15   46.76    1.38
 -12   9   9   84.47    2.13
 -12  11   8    3.37    1.29
 -11  13   4  106.25    1.75
  -9   3   8 1119.25    3.80
  -7   2  10    5.08    0.75
 -12   9   7   20.55    1.49
 -12   9  10    2.00    1.44
 -12  11  10   17.64    1.37
 -12  12   8    5.02    1.33
 -12  12   9    0.93    1.27
 -11   6  10    4.45    1.35
 -11  10   3   99.48    1.74
 -11  11   3    3.43    1.32
 -10   4   7    4.55    0.99
 -10   8  14   11.40    1.47
  -9   3   6  174.05    1.62
  -9   4   3    4.00    0.74
  -9   7   0   59.96    1.23
  -8   3  11  123.68    1.45
  -7   3  12  399.22    2.25
 -12  10   6   25.98    1.43
 -12  10  11   10.53    1.39
 -12  11  11    2.22    1.41
 -12  12   7    0.83    1.26
 -12  12  10    3.21    1.25
 -11   7   4  285.93    2.47
 -10   4   6   79.70    1.40
  -9   5  13   30.94    1.38
  -9   8  15    6.97    1.31
 -12  13   9    3.78    1.19
 -11   6  11   56.67    1.69
 -10   6  13  136.06    1.96
 -10   8   1  142.12    1.74
  -9   6  14    2.32    1.13
 -12  12   6   19.18    1.36
 -12  13   7   65.32    1.56
 -11   5   8  111.07    1.81
 -10   4   5  107.50    1.58
 -10   5  12   12.36    1.21
 -10   7  14   49.13    1.69
  -9   4  12   26.97    1.16
  -8   2   9    0.86    0.72
  -8   4  13   11.93    1.00
 -12   7   9   36.73    1.63
 -12   8  11    3.24    1.45
 -12   9   5  162.52    2.19
 -12   9  12   53.80    1.89
 -12  10   5   22.44    1.38
 -12  10  12   24.64    1.42
 -12  11  12    1.27    1.26
 -10   5   3    5.77    0.88
 -10   6   2   24.58    1.03
 -10  10  15   10.44    1.18
  -9   3   4  141.09    1.50
  -9   5   1  167.96    1.49
 -12   7   7   56.46    1.67
 -12  12  12    1.44    1.19
 -11   5   6   30.29    1.31
 -11   5  10   35.53    1.46
 -11   6  12   97.87    1.86
 -10   4  11   19.24    1.35
 -10   9  15   62.97    1.61
  -9   4   2    2.00    0.71
  -8   3  12  601.46    2.88
 -12   7  11  167.88    2.48
 -12   8   5   21.78    1.55
 -12   8  12  161.46    2.45
 -11   6   4   43.39    1.33
 -11   7   3   43.02    1.31
 -10   7   1   55.48    1.24
 -12  10   4    2.97    1.38
 -11   5   5   42.17    1.49
 -11   8  14    8.25    1.52
 -10   5  13   31.92    1.45
 -10   8  15    2.72    1.28
 -13  10   9   38.55    1.73
 -12   6   8  162.78    2.18
 -12   6   9   17.86    1.49
 -12   6  10    5.51    1.67
 -12   9   4   42.86    1.61
 -12  11   4   -0.60    1.20
 -12  13   5   11.42    1.15
 -11   8   2  269.64    2.32
 -10   3   7    2.75    0.94
 -10   3   8    7.78    1.02
 -10   6  14   30.37    1.43
  -9   4  13  381.90    2.63
  -9   5  14    8.10    1.11
 -13   9   8   10.81    1.64
 -13  10   8   16.40    1.37
 -13  10  10   15.37    1.36
 -13  11   9    1.49    1.28
 -13  11  10    1.98    1.18
 -12   6   7   17.44    1.41
 -12   7   5   99.84    1.90
 -12  12   4    9.84    1.22
 -11   4   8   17.63    1.26
 -11   6  13    5.56    1.30
 -10   3   6    8.56    0.95
 -10   3   9   18.40    1.10
 -10   4  12  166.54    2.05
  -9   2   7  116.12    1.40
  -9   2   8    6.17    0.85
 -13   9  10    6.82    1.39
 -13  10  11   92.19    1.82
 -13  11   7    3.83    1.32
 -13  12   9   31.47    1.28
 -12   6   6    4.72    1.49
 -12   6  11    1.85    1.38
 -12   8  13   18.24    1.45
 -11   4   7   38.02    1.34
 -11   4   9  108.66    1.76
 -11   5  12    3.52    1.26
 -11   6   3   32.09    1.33
 -10   5   2   87.33    1.31
 -10   7  15   31.35    1.44
 -13   8   9    7.20    1.46
 -13   8  10   10.37    1.47
 -13   9  11   10.92    1.39
 -13  12  10   13.08    1.15
 -11   5   4   49.52    1.32
 -11   9  15   21.77    1.32
 -10   4   3   32.22    1.00
 -13   8   7   38.91    1.80
 -13   8  11   20.26    1.74
 -13  10  12   13.81    1.42
 -13  12   7   13.73    1.18
 -12   5   8   29.75    1.68
 -12   5   9    7.33    1.60
 -12   7  13   16.10    1.63
 -12   9  14    0.92    1.33
 -12  10  14    4.49    1.16
 -10   3   5   60.18    1.21
  -9   4   1  800.48    2.91
  -9   5   0  349.22    2.00
 -13   7   9    4.30    1.69
 -13   9  12    3.02    1.27
 -12   5  10  248.71    2.50
 -12   9   3  103.97    1.77
 -10   3  11  165.57    1.94
 -10   5  14    3.71    1.30
  -9   2  10  244.40    1.90
 -13   7  10   44.41    1.70
 -13  12   6    1.33    1.10
 -12   8  14   67.48    1.83
 -11   4   5   72.90    1.43
 -11   6  14   12.72    1.46
 -13   7   7   26.67    1.50
 -13   8  12    1.60    1.33
 -13  10  13  121.59    1.89
 -12   5  11   54.97    1.65
 -10   3   4   16.61    0.94
  -8   1   9  489.76    2.35
 -12   6  13   16.52    1.58
 -11   4  12   23.14    1.43
 -11   6   2   56.58    1.34
  -8   2  12   61.72    1.20
 -13   6   9  126.61    2.07
 -13   6  10   46.18    1.89
 -13   7  12  156.62    2.32
 -12   6   4   79.69    1.54
 -12   7  14    2.35    1.31
 -11   3   7   -0.94    1.01
 -11   3   8   22.95    1.22
 -11   3   9   69.27    1.48
 -10   2   7  159.78    1.66
 -10   2   8  132.72    1.59
 -10   5   1  329.62    2.06
  -9   3  13   88.49    1.51
 -13   8   5    5.16    1.22
 -12   4   8   65.91    1.66
 -12   4   9   13.36    1.34
 -12   9  15   28.69    1.31
  -8   1  10  116.30    1.35
  -7   1  11   61.01    1.03
 -14   9  10    2.69    1.42
 -14  10   9    6.30    1.26
 -14  10  10   63.63    1.60
 -14  11   9    8.32    1.18
 -14  11  10   16.09    1.25
 -13   6  11  127.80    2.08
 -13  10  14    2.61    1.14
 -12   4   7   26.33    1.51
 -11   3   6  375.36    2.49
 -11   5  14    4.01    1.32
 -11   7   1  219.74    1.98
 -10   2   6  696.37    3.03
 -14   9   8   95.22    1.77
 -14   9  11    2.72    1.22
 -14  11   8    2.53    1.15
 -13   9  14   12.82    1.25
 -11   4  13  209.31    2.23
 -11   6  15   79.50    1.70
 -10   2  10  270.56    2.11
 -10   3   3   14.91    0.86
 -10   4  14   67.14    1.56
  -9   1   7   52.89    1.05
 -14   8   9   96.02    1.85
 -14   8  10   24.15    1.44
 -14  10  12    7.87    1.21
 -13   5   9   36.85    1.78
 -13   6  12    1.88    1.34
 -13  11   4    3.05    0.99
 -12   4   6   16.05    1.23
 -12   5  13   86.03    1.72
 -12   6  14    6.07    1.26
 -11   3   5  121.22    1.69
 -10   2   5  242.00    1.87
  -9   1   6    8.85    0.81
  -9   4   0   85.37    1.14
 -14   8  11    1.28    1.25
 -14   9  12    2.77    1.26
 -14  11   7   19.34    1.17
 -13   5   8  173.90    2.21
 -13   8   4    2.77    1.25
 -13   8  14    5.45    1.27
 -11   4   3  181.17    1.81
 -10   2  11  241.12    2.12
 -10   3  13   62.43    1.49
 -14   7   9    8.61    1.39
 -14   7  10   13.57    1.43
 -14   8  12   84.77    1.89
 -13   5  11   12.26    1.41
  -9   1   5   65.11    1.09
 -14   7   8   40.99    1.56
 -14   7  11   46.48    1.62
 -14   9  13    8.52    1.29
 -13   6  13   17.41    1.38
 -12   7   2  243.96    2.16
 -11   3  12   24.11    1.24
  -9   1  10  170.86    1.60
 -14  11   6    3.79    0.98
 -13   9  15   13.42    1.13
 -12   3   8   85.97    1.66
 -12   3   9    8.65    1.25
 -11   2   8    5.26    1.06
 -14   6   9   -0.18    1.61
 -14   6  10    2.99    1.63
 -14   7  12   16.95    1.39
 -14   8   6    2.89    1.16
 -14   8  13   21.55    1.42
 -13   5   6  101.62    1.81
 -13   9   3    2.74    1.17
 -12   3   7    4.25    1.18
 -12   6  15    9.22    1.35
 -11   2   7   15.13    1.10
 -11   4  14   11.56    1.22
 -10   2  12  495.13    2.81
 -10   3   2   13.71    0.82
 -14   6   8   19.55    1.46
 -13   4   8   62.63    1.86
 -13   4   9   21.26    1.46
 -13   4  10    1.88    1.57
 -13   8  15   43.44    1.33
 -12   4  13    8.27    1.25
 -12   8  16    8.92    1.10
  -9   1  11    3.92    0.90
  -9   2  13   84.52    1.43
 -14   7   6    6.30    1.43
 -14   9  14    1.34    1.09
 -13   5  13    1.94    1.46
 -13   6   4   14.72    1.35
 -13   6  14   37.81    1.53
 -13   8   3    4.63    1.13
 -12   4   4   10.65    1.11
 -12   6   2   29.59    1.28
 -11   4   2   16.07    1.07
 -10   1   7    1.72    0.91
  -8   1  12    2.35    0.82
 -15  10  10    5.18    1.06
 -14   6   7    3.97    1.31
 -14   8  14    2.95    1.25
 -14  11   5    0.48    0.98
 -13   4   7    9.14    1.32
 -13   4  11    7.17    1.35
 -13   5   5    5.36    1.19
 -13   7  15    5.75    1.27
 -10   1   6  327.79    2.13
 -15   9   9    6.19    1.19
 -15   9  11   16.25    1.22
 -13   7   3    4.65    1.26
 -12   3  12   51.12    1.61
 -11   3   3   63.66    1.22
 -10   1  10  183.01    1.76
 -15   8   9    5.74    1.18
 -15   8  11   23.21    1.34
 -15   9  12   13.59    1.23
 -15  10   8    4.98    1.05
 -14   5   8   14.03    1.66
 -14   5   9  315.58    2.78
 -14   5  10   17.55    1.48
 -14   5  11   85.02    2.02
 -13   4   6    2.23    1.23
 -12   3   5   86.88    1.54
 -12   5  15   34.25    1.47
 -10   1   5   29.77    0.99
 -10   2  13    3.88    1.14
 -14   6   6    7.42    1.27
 -14   7   5   13.61    1.24
 -14   7  14    4.28    1.21
 -13   5  14   20.86    1.45
 -12   4  14   42.10    1.41
 -11   4  15   27.10    1.35
  -9   0   7  283.20    1.94
  -8   0  10 1080.01    3.36
 -15   7   9    6.45    1.27
 -15   7  11    9.52    1.26
 -15  10   7   29.52    1.24
 -14   5   7  194.27    2.27
 -14   5  12   31.50    1.71
 -13   3   9   44.90    1.56
 -13   6  15   88.59    1.75
 -12   2   8   64.23    1.52
 -12   4   3   16.89    1.26
 -15   7  12   44.36    1.62
 -14   8  15   10.46    1.12
 -13   3   8  145.20    2.02
 -13   3  10  317.84    2.67
 -13   4  13   85.30    1.71
 -13   6   3    8.00    1.04
 -12   2  10  205.27    2.14
 -12   3  13  188.45    2.08
 -11   1   8   34.89    1.38
 -11   2   4    3.09    0.92
  -9   0   9  208.10    1.70
 -14   6   5    5.56    1.41
 -14   6  14    2.93    1.35
 -12   3   4   76.70    1.45
 -11   1   9  110.08    1.60
 -10   2   2   71.77    1.18
 -15   6   9  171.82    2.19
 -15   6  10   45.40    1.58
 -15   9   6    5.18    1.19
 -14   4   9    3.93    1.39
 -14   4  10  250.78    2.54
 -13   7  16    4.50    1.04
 -12   2   6  114.36    1.69
 -11   2  13  268.16    2.26
 -11   3   2   48.43    1.20
 -11   4   1  125.34    1.50
  -9   0   5  226.09    1.67
 -15   8   6    3.08    1.28
 -14   4   8   88.65    1.84
 -14   4  11   20.93    1.45
 -14   7  15   17.36    1.16
 -13   3   6  569.11    3.31
 -13   3  12    3.10    1.24
 -11   1   6   46.73    1.23
 -14   4   7   26.80    1.66
 -13   4  14   12.72    1.25
 -15   7   6    1.61    1.30
 -14   5  14    9.46    1.43
 -13   4   4    4.88    1.10
 -13   6  16    3.41    1.10
 -12   2   5  355.95    2.47
 -12   3  14   78.91    1.59
 -11   2   3   14.78    0.93
 -15   5   9   64.82    1.71
 -15   6  13   36.25    1.50
 -15   7  14   13.17    1.16
 -14   6   4    1.64    1.23
 -14   6  15   65.64    1.49
 -13   3  13    6.12    1.43
 -12   3   3    4.71    1.12
 -10   0   6  263.31    1.94
  -9   0  11    6.00    0.88
 -16   8  10    8.19    1.13
 -15   5   8   66.57    1.86
 -15   5  12   18.99    1.57
 -15   9   5    2.72    1.07
 -14   4  13    1.34    1.22
 -13   2   9   14.54    1.41
 -13   2  10  117.95    1.87
 -12   1   9   13.95    1.36
 -12   5   1    4.05    1.03
 -11   1  12  128.45    1.75
 -16   8   9    3.53    1.11
 -16   8  12    3.80    1.07
 -16   9   8   20.85    1.15
 -15   8   5   30.34    1.26
 -14   3   9  136.86    2.06
 -14   3  10   77.56    1.78
 -13   2   7   43.86    1.67
 -12   2  13  115.92    1.71
 -11   2  14   33.02    1.32
 -10   1  13  167.42    1.78
 -10   3   0   15.96    0.86
 -16   7   9   78.28    1.67
 -16   7  10    1.67    1.20
 -16   7  11   13.61    1.23
 -15   6  14   33.67    1.34
 -14   3   8  100.11    1.88
 -14   3  11  137.88    2.03
 -13   4  15    3.27    1.21
 -12   1   7    5.52    1.13
 -11   1   4   35.81    1.21
 -10   2   1   50.38    0.97
 -16   7  12    7.45    1.15
 -15   4  10    1.61    1.56
 -15   7   5    1.94    1.11
 -14   3   7  209.12    2.43
 -14   5  15    3.35    1.18
 -13   2  12    1.25    1.38
 -13   3  14  111.64    1.89
 -13   4   3   71.84    1.53
 -13   5  16    3.01    1.08
 -16   6  10   16.18    1.43
 -16   9   7   15.46    1.02
 -15   4  11  191.59    2.27
 -14   4   5    4.03    1.18
 -14   4  14   49.24    1.51
 -13   3   4  104.74    1.75
 -13   5   2  144.47    1.79
 -12   1   6   16.46    1.16
 -11   0   7 1023.79    3.88
 -11   2   2  169.73    1.61
 -11   4   0   -0.47    0.90
 -16   6   9    0.05    1.13
 -16   7  13   74.10    1.47
 -15   4   8   20.14    1.43
 -15   4  12    7.82    1.49
 -11   1  13  199.35    1.99
 -10   0   4  165.84    1.54
 -10   1   2  209.54    1.61
  -9  -1   7  102.50    1.34
  -9  -1   8   16.78    0.88
 -15   5  14    6.20    1.19
 -15   8   4    2.49    1.05
 -14   3   6   17.21    1.35
 -14   3  13    8.48    1.23
 -12   2  14  132.87    1.78
 -12   3   2   27.85    1.07
 -12   4   1   48.96    1.26
  -9  -1   9   93.95    1.28
  -8  -1  10  107.66    1.27
 -16   6  13   18.12    1.27
 -16   7   7    3.24    1.15
 -15   4   7  134.39    1.99
 -14   2   9   85.65    1.97
 -14   2  10   74.48    1.91
 -13   2   5    1.10    1.15
 -12   2   3  283.44    2.22
 -16   5  10    7.03    1.24
 -16   5  11   81.48    1.65
 -14   2   8   46.37    1.58
 -14   2  11    4.12    1.51
 -14   4   4    6.65    1.34
 -13   1   8  218.95    2.25
 -13   1   9   15.82    1.33
 -16   5   9   83.79    1.68
 -16   5  12   33.00    1.37
 -16   6   7   44.97    1.50
 -15   3   9   32.45    1.53
 -15   3  10   27.07    1.49
 -15   5   5    2.62    1.30
 -14   5  16   32.02    1.19
 -13   1   7   21.15    1.52
 -13   3  15   12.71    1.31
 -11   0   5  590.28    2.85
  -9  -1  10  163.46    1.53
 -16   5   8   16.86    1.45
 -15   3   8  232.23    2.56
 -14   2   7   41.67    1.51
 -14   3   5   67.86    1.56
 -14   3  14   27.90    1.35
 -13   3   3    3.29    1.03
 -12   0   8  121.09    1.75
 -10  -1   9   46.45    1.27
 -16   5  13   13.98    1.25
 -15   3  12    3.82    1.25
 -15   4  14    1.22    1.19
 -15   6   4   98.89    1.69
 -13   1  12  665.14    3.51
 -13   2   4  230.36    2.23
 -13   2  14  196.52    2.08
 -11   1  14  200.14    1.96
 -10   2   0    3.80    0.68
  -8  -1  11  211.08    1.55
 -17   7  10   19.11    1.16
 -17   7  11    0.38    0.98
 -16   4  10   52.14    1.72
 -16   4  11   23.53    1.53
 -15   3   7   39.11    1.65
 -13   1   6   29.81    1.34
 -11   3   0   44.74    1.10
 -10   1   1   50.83    1.04
  -9  -1  11    4.08    0.85
 -16   4   9    0.48    1.22
 -14   2   6   63.27    1.58
 -14   2  13    1.36    1.13
 -12   0   6   34.05    1.25
 -17   6  10    7.91    1.19
 -17   6  11    6.68    1.15
 -16   5  14   12.94    1.12
 -16   8   5    1.20    0.83
 -15   4   5   18.66    1.23
 -14   3  15    6.14    1.23
 -14   4   3    0.86    1.15
 -14   4  16    0.61    1.05
 -12   2   2  275.84    2.06
 -10  -1   5   50.47    1.09
 -17   6  12   -0.06    1.00
 -17   7   8   21.09    1.15
 -16   4   8   36.10    1.43
 -15   2   9   15.78    1.64
 -15   2  10   19.34    1.43
 -15   4  15    6.36    1.18
 -14   1   9   58.85    1.64
 -13   1   5   78.11    1.55
 -12   0  12  809.39    3.65
 -12   1  14   19.30    1.16
 -11  -1   7  145.77    1.71
 -11  -1   8   34.57    1.23
 -11   0  13  233.77    2.08
 -10  -1  11    6.85    1.00
 -16   5   6   15.85    1.34
 -15   2  11   43.01    1.53
 -14   1   8   30.36    1.46
 -13   0   9    2.68    1.23
 -13   2  15    3.70    1.17
 -12   1   3  132.32    1.60
 -11  -1  10    5.22    1.15
 -10   0   2  162.24    1.45
 -16   3  10    7.65    1.50
 -14   1   7   48.22    1.74
 -13   2   3    1.30    1.02
 -11  -1   6   82.99    1.40
 -10  -1   4  429.43    2.28
 -17   5  10   13.31    1.21
 -17   5  12   11.15    1.18
 -17   6   8    3.00    1.03
 -16   3   9   13.62    1.34
 -16   4  14   48.84    1.40
 -16   5  15   32.96    1.14
 -13   0   7   22.95    1.32
 -13   4   1   22.16    1.18
  -8  -2   9    1.16    0.78
 -16   3  12   32.90    1.35
 -15   2   7  100.49    1.83
 -15   2  13    8.53    1.38
 -15   3   5    4.48    1.31
 -15   4   4    3.66    1.21
 -13   1  14   83.03    1.66
 -11  -1  11  191.74    1.86
 -10  -1  12  342.89    2.24
  -9  -2   8    3.56    0.82
 -17   5  13   11.85    1.04
 -16   4   6   28.74    1.43
 -14   1   6   13.96    1.29
 -14   1  13  111.72    1.88
 -14   3   3   34.56    1.23
 -12  -1   8   12.45    1.19
 -12   0   4  100.19    1.50
 -11  -1   5  421.82    2.46
  -9  -2   9  116.62    1.39
 -17   4  11   61.31    1.58
 -17   6   7    5.81    1.01
 -15   3  15   44.78    1.31
 -15   4  16   12.03    0.96
 -14   2   4    0.87    1.09
 -14   2  15   78.13    1.59
 -14   3  16    1.55    1.06
 -14   4   2   60.59    1.40
 -12  -1   7    5.07    1.12
 -12  -1  10   93.31    1.60
 -11   1   1    2.70    0.76
 -11   2   0   32.94    0.95
 -10   1   0    3.03    0.73
  -9  -2   5    9.13    0.92
  -8  -2  10   13.54    0.82
 -17   4  10   27.30    1.31
 -17   4  12    6.60    1.19
 -16   3   7    8.88    1.25
 -15   1   9    2.35    1.55
 -15   1  10   24.18    1.44
 -10  -2   7  136.94    1.60
 -10  -1   3  145.32    1.43
 -17   4   9   52.20    1.45
 -17   7   6   34.73    1.04
 -16   2  10   23.35    1.59
 -16   2  11   33.78    1.59
 -16   3  14   -0.19    1.21
 -16   6   4   59.23    1.30
 -15   1  11   91.39    1.77
 -15   2  14   18.27    1.24
 -14   0  10    3.48    1.26
 -13   2   2  146.14    1.73
 -12  -1   6    3.91    1.07
 -12  -1  11  465.17    2.80
 -10  -2   9    1.46    0.88
 -17   4  13    8.00    1.06
 -17   5   7    2.60    1.07
 -16   2   9    2.80    1.27
 -15   1   8   11.17    1.37
 -15   3   4  161.03    1.97
 -14   0   8    3.33    1.28
 -13   0   5   18.38    1.21
 -13   0  13   14.49    1.16
 -10  -2   6  621.36    2.86
 -17   6   6   18.67    1.00
 -16   2   8  155.37    2.19
 -16   3   6   32.77    1.50
 -15   4   3    7.01    1.18
 -10  -2  10  249.75    1.95
  -9  -2   4  130.08    1.33
 -16   5   4    0.47    1.07
 -15   1   7   39.88    1.51
 -15   2   5   33.02    1.34
 -14   2   3   17.66    1.26
 -13  -1   8  259.30    2.36
 -13  -1   9    6.77    1.25
 -12  -1   5   35.34    1.21
 -12  -1  12   58.12    1.35
 -17   4   7   39.65    1.41
 -13  -1   7   21.45    1.51
 -11  -2   7    9.58    1.06
 -11  -1  13  143.88    1.68
  -9  -2  11  160.60    1.48
 -18   5  10    7.39    0.93
 -17   5   6    4.79    1.00
 -16   3  15   21.49    1.06
 -15   1   6   43.86    1.67
 -14   0   6    5.02    1.22
 -14   1   4   33.45    1.30
 -13  -1  11    8.65    1.20
 -11  -2   6    3.62    1.01
 -11  -2  10    2.16    0.97
 -10  -2  11  219.35    1.86
 -17   3   8    3.82    1.26
 -17   3  13   11.98    1.12
 -10  -2   4  258.58    1.84
  -9  -2   3  309.61    1.82
 -16   1   9    8.97    1.51
 -16   1  10    6.61    1.26
 -16   2  14    6.96    1.11
 -16   3   5   27.07    1.24
 -16   4   4    9.31    1.17
 -15   0  11    2.87    1.44
 -15   1  14    2.24    1.21
 -13  -1   6   14.93    1.23
 -12  -1   4  141.70    1.67
 -12  -1  13  100.90    1.55
 -11  -2  11  109.94    1.61
 -11   1   0   18.89    0.82
 -18   4  11   13.19    1.01
 -17   3  14   65.74    1.39
 -17   4   6   17.22    1.19
 -16   1  12    0.62    1.12
 -15   3   3   41.16    1.29
 -13   1   2    7.76    1.10
 -12  -2   8   73.01    1.54
 -12   0   2    9.18    1.04
 -11  -2   5   60.48    1.25
 -10   1  -1  181.03    1.44
 -18   4  10   27.39    1.12
 -18   5   8    6.68    0.94
 -17   2  10   12.41    1.17
 -17   2  11   10.50    1.12
 -17   2  12   31.41    1.36
 -16   1   8   21.36    1.37
 -14  -1   8   28.48    1.63
 -14  -1   9   55.34    1.59
 -14  -1  10    1.12    1.24
 -12  -2   7   41.93    1.36
 -12  -2  10  207.93    2.06
 -10   0   0    2.05    0.62
  -8  -3   8    6.71    0.81
 -18   4   9    7.48    0.99
 -16   1  13   55.81    1.52
 -15   0   7    4.33    1.28
 -15   2  16    5.63    0.97
 -14   2   2   74.44    1.51
 -13  -1  13  110.30    1.71
 -13   0   3   82.96    1.45
  -9  -3   8 1180.96    3.90
 -16   1   7    1.99    1.21
 -16   2  15   25.62    1.07
 -15   0  13  439.31    2.91
 -12  -2   6   81.75    1.51
 -12  -2  11   43.05    1.31
 -11  -2   4    1.68    1.04
 -11  -2  12   23.65    1.17
 -11  -1   2   19.85    0.91
  -8  -3   9  135.07    1.37
 -18   3  11    9.64    1.09
 -18   4   8   22.65    1.12
 -17   2   8    5.45    1.11
 -16   2   5   -0.73    1.23
 -16   3   4  110.23    1.69
 -15   1  15   12.98    1.07
 -14  -1  12  276.79    2.36
 -13  -2   9    9.84    1.48
 -10  -3   7    3.71    0.97
 -10  -1   1  124.49    1.29
  -9  -3   5  146.44    1.46
  -9  -2   2  337.59    1.86
 -18   3  12    5.88    0.97
 -17   3   6    2.81    1.06
 -16   1  14    2.03    1.10
 -15   2   3   29.44    1.30
 -14   0   4  183.54    1.98
 -13  -2   8    1.43    1.21
 -12  -2   5  292.18    2.33
 -10  -3   6    5.07    0.92
 -10  -3   9   17.63    1.00
 -17   2  14    2.89    0.95
 -16   0  10   17.54    1.32
 -15   1   4   27.41    1.23
 -13  -2   7   46.51    1.47
 -13  -1   4  166.86    1.88
 -12  -2  12   21.16    1.10
  -9  -3  10  102.51    1.35
 -17   1  11    3.22    1.08
 -15  -1  10   19.31    1.35
 -15   3   2   93.27    1.49
 -13  -2  11   38.39    1.35
 -11  -3   7   -0.29    1.23
 -11  -3   9   69.65    1.56
 -10  -3  10   54.67    1.29
  -9  -3   4  205.07    1.66
  -8  -3  10   28.58    0.81
 -18   4   7    4.32    0.90
 -17   1   9    2.43    1.13
 -17   1  12   16.44    1.20
 -13  -2   6    9.79    1.21
 -13   1   1   35.41    1.09
 -12   1   0   34.39    1.02
 -11  -2   3   28.45    1.01
 -11  -2  13  243.22    1.99
 -18   2  11    2.22    1.06
 -17   1   8    2.91    1.32
 -16   1  15   14.94    1.11
 -16   2   4  184.53    2.02
 -15  -1  12   20.05    1.43
 -14   1   2   14.72    1.17
 -12  -2   4  298.31    2.21
 -11  -3   6  338.71    2.34
 -11  -3  10   11.37    1.08
 -18   2  12   17.91    1.05
 -17   2   6    2.69    1.07
 -16   1   5   80.63    1.68
 -14  -2   9  105.09    1.84
 -14  -2  10   72.04    1.65
 -14   2   1    8.21    1.05
 -12  -2  13  110.84    1.63
 -12  -1   2   52.70    1.19
 -11  -1   1    2.56    0.77
  -9  -3  11   24.58    0.97
 -18   2   9   21.91    1.24
 -17   4   4   31.46    1.07
 -16   3   3   36.88    1.15
 -14  -1  14   -0.30    1.16
 -13  -2   5    1.64    1.32
 -13  -1   3    2.05    1.03
 -11  -3   5   69.18    1.44
 -18   3   7    9.56    0.99
 -18   4   6    0.93    0.90
 -17   1   7    1.51    1.08
 -17   1  14    7.00    1.04
 -15   1   3    7.21    1.05
 -12  -3   7    7.92    1.19
 -12  -3  10    4.20    1.11
 -11  -3  11   74.34    1.35
 -10  -1   0   12.73    0.72
  -9  -3   3  182.27    1.49
 -17   0  11    4.36    1.26
 -16   0   6  326.97    2.59
 -16   0  14   10.48    1.07
 -14  -2  12   98.25    1.79
 -13  -2  13   12.56    1.17
 -12  -3   6   29.94    1.45
 -17   0   9   35.76    1.52
 -17   2   5   21.47    1.27
 -16  -1  10    4.85    1.22
 -16  -1  11    2.25    1.15
 -14  -2   6   65.58    1.76
 -12  -3  11   53.83    1.37
 -18   1  10    1.08    1.11
 -18   1  11   17.93    1.19
 -17   3   4   40.53    1.21
 -16  -1   8   14.94    1.53
 -15  -1  14    2.25    1.16
 -13  -3   8  142.36    1.97
 -13  -3   9   57.75    1.58
 -11  -3   4   55.32    1.23
 -10  -3  12    6.37    1.00
 -10  -2   1   52.79    0.99
 -18   2   7   17.64    1.11
 -18   3   6    0.32    0.84
 -17   1   6   31.09    1.26
 -16   1   4    6.94    1.10
 -16   2   3    3.25    1.10
 -15  -2   9   25.19    1.44
 -15  -2  10   12.99    1.32
 -13  -3   7   40.15    1.46
 -13  -3  10  369.78    2.69
 -13   0   1  166.03    1.68
 -12  -3   5   74.78    1.47
 -12   0   0   54.91    1.22
  -9  -4   6  326.60    2.30
  -9  -4   8   12.58    1.11
  -9  -1  -1   23.39    0.70
 -18   1   9   12.38    1.12
 -16  -1   7    3.20    1.44
 -15  -2   8    3.94    1.31
 -14   0   2    4.09    0.99
 -14   1   1  180.64    1.83
 -13  -3  11    1.96    1.29
 -13  -1   2    6.09    1.00
 -13   1   0   32.94    1.15
 -12  -1   1   58.54    1.19
 -10  -4   8  436.56    2.71
  -9  -3   2   17.82    0.75
  -8  -4   5  238.95    1.78
 -15  -2   7   83.10    1.91
 -15  -2  12   63.31    1.60
 -14  -2   5   31.71    1.36
 -14  -1   3   39.23    1.44
 -13  -3   6  576.93    3.21
 -11  -1   0   37.30    1.05
 -11   0  -1   96.19    1.25
 -10  -4   9   15.05    1.20
  -9  -4   5  191.30    1.70
  -9  -2   0   28.08    0.84
 -18   1   8   11.71    1.11
 -17   0   7   28.99    1.26
 -14  -3   9  178.86    2.30
 -11  -4   7   26.81    1.47
  -8  -4   9    2.12    0.74
 -18   2   6    9.57    1.07
 -17   1   5   12.46    1.21
 -14  -3   8  104.87    1.86
 -13  -3  12    2.58    1.06
 -12  -3   4   42.86    1.27
 -11  -2   1   43.25    1.11
 -10  -4   5   77.61    1.32
 -10  -4  10   77.87    1.40
 -17  -1   9    3.03    1.32
 -17  -1  11    1.79    1.04
 -15  -2   6  103.70    1.79
 -15  -2  13    7.34    1.14
 -14  -3  11  104.38    1.73
 -14  -2  14   42.39    1.29
 -13  -3   5  137.56    1.84
 -11  -4   6    5.61    1.08
 -11  -4  10   33.42    1.34
 -18   0  10   33.39    1.24
 -18   0  12    7.10    0.95
 -16  -2   9    2.33    1.23
 -16  -2  11   35.97    1.36
 -16   0   4  108.37    1.74
 -12  -4   8   53.35    1.56
 -17  -1   8    2.72    1.12
 -16  -2   8  135.37    2.10
 -12  -4   7    6.55    1.24
 -12  -4  10    8.96    1.34
 -11  -4   5  113.59    1.59
 -10  -4   4   70.31    1.25
 -10  -2   0    2.75    0.69
  -8  -4  10    6.78    0.74
 -16  -2  12   94.76    1.59
 -15  -2   5   37.06    1.55
 -14  -3   6    9.57    1.29
 -13  -3  13    7.12    1.08
 -12  -4   6   18.28    1.26
 -11  -4  11   13.45    1.15
 -10  -4  11   16.30    1.04
 -17  -1   7    0.55    1.27
 -16  -2   7   43.84    1.66
 -15  -3   8  207.17    2.42
 -15  -3   9   32.60    1.47
 -14  -1   2    6.87    1.03
 -13  -3   4   95.17    1.60
 -12  -1   0   20.70    1.06
 -18   1   6   15.50    1.03
 -17   0   5  204.53    2.07
 -14  -3  13   13.02    1.26
 -13  -2   2  110.09    1.56
 -12  -2   1   15.60    1.10
 -11  -4   4    4.10    0.99
 -17  -1  14    6.90    0.91
 -17   2   3   17.65    1.00
 -15   1   1   -2.28    0.89
 -14  -2   3   19.45    1.20
 -12  -4   5   41.13    1.34
 -10  -3   1   37.04    0.96
  -9  -1  -2  165.09    1.30
 -18  -1  10    1.47    1.10
 -18  -1  11   16.83    1.14
 -17  -2  10   10.38    1.32
 -16  -2   6  113.81    1.94
 -13  -4   6    3.37    1.45
 -13  -4  11    4.36    1.15
 -11  -4  12   17.21    1.09
  -9  -2  -1   50.38    0.86
  -8  -4   2   75.18    1.02
 -18  -1  12    4.50    1.00
 -17  -2   9   21.45    1.23
 -17  -2  11    9.89    1.14
 -16  -2  14    7.10    1.11
 -16  -1   4    2.67    1.25
 -16   1   2    1.50    0.98
 -12  -4  12    2.20    1.13
  -9  -4   2    1.27    0.84
 -18  -1   9   16.70    1.12
 -16  -3  10    3.24    1.38
 -15  -3   6  106.34    1.81
 -15  -3  13   -0.08    1.19
 -12  -3   2   19.75    1.09
 -11  -4   3  172.54    1.74
 -10  -5   8   45.62    1.37
  -9  -5   6   40.04    1.27
  -9  -5   7    1.56    1.05
  -9  -3   0   82.98    1.12
 -18  -1  13   39.63    1.11
 -18   1   5   24.99    0.98
 -17  -2   8    4.41    1.12
 -14  -4   7   34.15    1.49
 -14  -4  11   14.78    1.41
 -14  -3   4  130.04    1.83
 -14  -3  14   23.55    1.19
 -13  -4   5   56.57    1.50
 -13  -4  12   12.36    1.11
 -11  -3   1   17.59    0.93
 -10  -5   6    3.52    1.10
 -10  -5   9   22.18    1.27
 -18   2   4   14.58    0.86
 -17   1   3    2.03    0.94
 -16  -3   8   63.45    1.60
 -16  -3  12   22.77    1.34
 -14  -1   1  140.25    1.73
 -11  -5   6   57.46    1.64
 -10  -5   5  145.02    1.81
 -10  -4   2   81.85    1.25
 -10  -2  -1    4.25    0.74
 -17  -2   7   59.12    1.44
 -17  -1   5   11.43    1.11
 -15  -3   5    5.49    1.23
 -15  -1   2   22.32    1.24
 -14  -4   6   66.91    1.64
 -14  -2   2   48.55    1.31
 -13  -2   1   51.38    1.24
 -16  -3   7    4.05    1.22
 -15  -4   9  105.30    1.85
 -15  -2   3   34.26    1.44
 -15   0   1   13.53    1.08
 -14  -4  12    4.07    1.09
 -12  -5   7   53.31    1.58
 -12  -5   9   12.41    1.32
 -12  -4   3    5.53    1.26
 -12  -4  13   29.04    1.21
 -12  -2   0  262.73    2.02
 -10  -3   0   14.11    0.81
  -8  -5   9   96.46    1.21
  -8  -4   1    1.69    0.62
 -16  -1   3    5.20    1.19
 -16   0   2  283.80    2.16
 -15  -4   8   28.57    1.47
 -15  -4  11  169.40    2.12
 -13  -4   4    3.42    1.16
 -13  -3   2  389.31    2.55
 -12  -5   6   59.01    1.55
 -12  -5  10  181.77    2.03
 -12  -1  -1    4.85    0.89
 -11  -5   5   32.31    1.28
 -11  -4   2   14.91    1.14
 -10  -5   4  364.67    2.34
 -18  -2  10    7.28    1.05
 -17  -2   6    1.77    1.05
 -15  -4   7  141.50    2.17
 -14  -4   5    7.18    1.26
 -14  -3   3   27.94    1.27
 -13  -5   8  221.37    2.39
 -12  -3   1    9.70    0.97
 -18  -2   9   22.22    1.16
 -18   1   4   15.37    0.91
 -17  -3   9   17.98    1.18
 -17  -3  11   13.51    1.19
 -16  -2   4  145.47    1.81
 -15  -4  12   19.74    1.36
 -14  -4  13    0.25    1.17
 -13  -5   7  217.78    2.34
 -13  -5  10   46.37    1.60
 -12  -5  11   53.68    1.47
 -11  -2  -1   52.83    1.12
  -8  -5   3   22.19    0.86
 -17  -3   8    3.59    1.29
 -17  -3  12   73.00    1.47
 -17  -1   4   11.83    1.13
 -17   0   3   75.87    1.35
 -11  -3   0   52.66    1.21
 -10  -5  11    5.49    0.88
  -9  -2  -2    6.67    0.71
 -18  -2   8    6.36    1.03
 -16  -4  10   50.64    1.61
 -16  -3  14   -0.17    0.90
 -15  -4   6   11.24    1.32
 -13  -5   6   80.88    1.71
 -13  -5  11   12.02    1.39
 -13  -4   3   58.52    1.46
 -10  -5   3    7.73    0.96
  -9  -3  -1  127.98    1.24
  -7  -5   9   44.76    0.88
 -17  -2   5   21.82    1.31
 -15  -4  13    3.67    1.16
 -14  -5   8   15.70    1.44
 -14  -5   9  291.75    2.63
 -14  -4   4    7.74    1.23
 -14  -2   1   10.14    1.11
 -17  -3   7   10.89    1.14
 -15  -2   2    0.53    1.03
 -14  -5   7  217.23    2.35
 -14  -3   2   18.04    1.30
 -14  -1   0    1.95    1.01
 -12  -5   4   21.69    1.26
 -12  -5  12   37.43    1.29
 -11  -5   3   12.64    1.09
 -11  -5  12    4.04    1.05
 -11  -4   1   96.60    1.51
  -8  -5   2  178.04    1.49
 -18   0   4    1.48    0.88
 -16  -4  12    8.76    1.16
 -16  -2   3    2.08    1.16
 -16  -1   2    0.89    1.05
 -15  -4   5   15.81    1.29
 -15  -3   3   36.54    1.46
 -14  -5  11  102.59    1.71
 -13  -5  12   31.00    1.40
 -13  -3   1    0.35    0.99
 -10  -3  -1   45.78    1.05
 -10  -2  -2  174.09    1.48
  -9  -5   2    7.65    0.84
  -9  -4   0   81.60    1.12
 -18  -1   5   33.64    1.11
 -14  -5   6    1.55    1.29
 -12  -3   0    2.09    1.00
 -12  -2  -1    5.07    0.97
 -11  -6   7  588.97    3.59
  -9  -6   7  653.26    3.31
 -18  -3   9    3.80    1.08
 -18  -3  10   16.82    1.09
 -18  -3  11   13.15    1.00
 -17  -3   6    2.52    1.03
 -16  -3   4  108.45    1.77
 -15  -5   8   48.59    1.77
 -15  -5   9   58.38    1.62
 -14  -5  12   34.54    1.44
 -13  -4   2   22.44    1.37
  -9  -6   8   70.81    1.35
 -18  -2   6   14.34    1.05
 -17  -4  10   17.87    1.29
 -17  -2   4    9.47    1.14
 -17  -1   3    2.44    0.94
 -13  -5   4   35.30    1.40
 -12  -6   7   25.83    1.51
 -12  -5   3   87.67    1.57
 -10  -4   0  159.99    1.53
  -8  -6   5   27.15    1.30
  -8  -6   7    8.14    0.90
 -18  -3   8    3.04    1.10
 -17  -4   9   47.94    1.37
 -15  -5   7    7.03    1.32
 -14  -5   5   12.94    1.33
 -12  -6   6    4.15    1.32
 -11  -6  10    6.14    1.22
 -11  -5   2  148.69    1.71
  -8  -5   1 1150.31    3.38
  -8  -3  -2    4.31    0.62
 -17  -4  12    6.61    1.09
 -13  -6   8   23.06    1.54
 -13  -6   9   97.17    2.00
 -13  -5  13   10.07    1.04
 -11  -3  -1   95.86    1.28
 -10  -6   4   26.15    1.20
 -10  -6  10   69.68    1.41
  -9  -5   1  261.80    1.84
  -8  -6   4   26.00    1.04
  -8  -6   8   42.41    0.99
 -16  -4   5   15.62    1.40
 -15  -5   6   43.69    1.52
 -15  -5  12   21.87    1.22
 -15  -2   1   12.85    1.16
 -14  -3   1    4.66    1.14
 -14  -2   0   28.60    1.19
 -13  -6   7    9.06    1.42
 -12  -6   5  113.65    1.83
 -11  -4   0    2.03    1.01
 -11  -2  -2   12.01    0.91
  -7  -6   6   56.37    1.05
 -18  -3   7   11.31    1.06
 -18  -2   5   19.73    1.07
 -17  -4   7   43.83    1.33
 -16  -5  10    8.87    1.15
 -16  -2   2    8.97    1.13
 -15  -3   2   96.62    1.55
 -14  -5   4   58.01    1.71
 -13  -6   6   12.85    1.40
 -13  -5   3  129.53    1.82
 -13  -3   0   13.71    1.10
  -9  -6  10    0.57    0.91
  -8  -6   9   14.56    0.89
  -7  -6   4    7.55    0.83
 -16  -5  11   73.07    1.51
 -14  -6   8   14.43    1.44
 -14  -4   2   56.05    1.51
 -13  -2  -1    7.05    1.02
 -10  -6   3   95.79    1.51
 -17  -2   3   17.20    1.14
 -15  -4   3    5.68    1.11
 -14  -6   7    3.38    1.35
 -14  -6  10    5.91    1.24
 -13  -6   5    4.34    1.51
 -12  -6   4   80.02    1.64
  -7  -6   8   40.38    0.92
 -18  -4  10   21.26    1.07
 -18  -4  11    5.40    0.98
 -17  -4   6   20.01    1.21
 -11  -6   3   35.04    1.30
 -10  -3  -2    7.13    0.87
  -7  -6   3   39.50    0.99
 -18  -4   9    6.26    0.99
 -17  -3   4   41.67    1.27
 -14  -6   6    6.22    1.34
 -14  -6  11    6.89    1.21
 -12  -6  12    3.43    1.10
 -10  -4  -1   11.95    0.86
 -17  -5   9   84.74    1.63
 -15  -6   8    1.72    1.27
 -15  -6   9  124.73    1.92
 -15  -6  10   41.62    1.62
 -13  -6  12    3.19    1.22
  -8  -6   2   18.80    0.90
 -18  -2   4   14.35    0.90
 -17  -5   8    2.93    1.19
 -16  -5  13   11.58    1.00
 -15  -5   4    6.56    1.20
 -14  -6   5    6.97    1.53
 -12  -6   3   89.74    1.64
 -12  -5   1    4.84    1.25
 -10  -7   6  139.07    2.10
 -10  -5   0  323.43    2.19
  -7  -6   2   38.13    0.92
 -18  -4   7    0.59    1.03
 -18  -3   5    2.41    0.97
 -16  -3   2   14.96    1.19
 -15  -6  11   13.93    1.25
 -15  -3   1   30.16    1.19
 -14  -3   0   32.29    1.27
 -11  -7   6    8.08    1.44
 -11  -4  -1   30.81    1.13
 -10  -7   5   12.89    1.55
 -17  -5   7    1.52    1.19
 -16  -5   5    8.43    1.15
 -15  -6   6   36.18    1.66
 -15  -4   2    2.47    1.05
 -11  -7   5   30.49    1.48
 -11  -7   9    0.81    1.22
 -11  -3  -2    8.67    0.83
 -10  -7   9    0.14    1.16
  -8  -4  -2  200.68    1.48
 -17  -3   3    6.68    1.05
 -16  -6   9   -1.04    1.29
 -16  -4   3   37.85    1.31
 -15  -6  12    3.99    1.13
 -13  -6   3    7.41    1.45
 -13  -4   0   95.18    1.57
 -13  -3  -1   58.48    1.31
 -11  -5   0  116.42    1.54
  -8  -6   1   21.49    0.90
 -17  -2   2    1.04    0.90
 -16  -6   8   13.55    1.22
 -15  -5   3   15.63    1.39
 -14  -6   4    3.97    1.25
 -14  -5   2   31.81    1.30
 -12  -7   5   67.21    1.70
 -12  -7  10   20.18    1.30
 -12  -6   2   36.90    1.53
 -11  -7  10   65.66    1.40
 -10  -7   4  144.07    1.89
 -10  -6   1    8.08    1.15
  -9  -7   4    4.93    1.14
  -9  -4  -2   -0.48    0.65
 -17  -5   6    4.07    1.16
 -15  -6   5   41.91    1.46
 -14  -7   8   40.61    1.83
 -14  -6  13    8.07    1.01
 -13  -7   6    2.26    1.39
 -13  -7  10   79.89    1.68
 -13  -5   1   77.80    1.49
 -11  -7   4  274.19    2.42
 -10  -7  10    2.63    1.09
  -9  -7   9    8.47    0.90
  -9  -3  -3   94.81    1.15
  -7  -6   1    8.56    0.75
 -18  -5   9   30.07    1.18
 -14  -7   7    3.05    1.42
 -12  -4  -1    1.77    1.00
  -9  -5  -1    3.52    0.76
 -18  -5   8    1.89    1.03
 -18  -3   4    3.74    0.80
 -16  -6  12   25.71    1.12
 -15  -6  13   36.55    1.21
 -14  -7  10   11.39    1.24
 -13  -7   5    6.75    1.36
 -13  -7  11   -0.02    1.27
 -12  -7   4   70.64    1.67
 -12  -7  11  153.55    1.84
 -12  -5   0  131.69    1.67
 -11  -7  11    3.49    1.11
 -10  -4  -2    5.47    0.78
  -8  -7   3  322.23    2.23
  -7  -7   6  185.84    1.60
 -16  -6   6   23.70    1.26
 -14  -6   3   16.98    1.31
 -11  -7   3   77.80    1.61
 -10  -5  -1  224.23    1.84
  -7  -7   4   14.67    0.94
  -7  -7   7   81.42    1.20
 -18  -4   5    3.80    0.89
 -17  -6   9   12.44    1.13
 -16  -3   1   26.91    1.11
 -15  -6   4   93.46    1.69
 -15  -3   0   43.89    1.24
 -14  -7  11   44.64    1.41
 -13  -7   4   42.94    1.70
  -8  -7   9  119.16    1.34
 -18  -5   7    8.82    1.00
 -17  -6   8    3.51    1.05
 -15  -7   7   99.00    1.80
 -15  -7  10    5.70    1.21
 -15  -5   2    8.21    1.23
 -14  -7   5   10.89    1.35
 -12  -7   3   35.66    1.45
 -10  -7   2  139.32    1.90
  -9  -7   2  546.93    2.86
  -7  -7   3   96.36    1.36
 -17  -6   7    9.17    1.18
 -17  -4   3   27.47    1.17
 -17  -3   2    0.90    0.80
 -16  -6   5   -0.31    1.06
 -16  -5   3   10.24    1.22
 -11  -5  -1   10.58    0.98
 -11  -4  -2    1.11    0.87
  -8  -7   2   11.06    0.98
  -7  -7   8   18.21    0.80
 -15  -7   6    0.07    1.21
 -14  -7  12   12.96    1.23
 -13  -5   0   76.69    1.45
 -12  -8   7   40.20    2.07
 -12  -8   8   44.36    1.95
 -11  -8   8   78.53    2.02
 -11  -7   2  131.90    1.82
 -10  -8   7   29.67    1.64
  -6  -7   5  156.70    1.37
 -18  -5   6   -0.43    0.90
 -16  -7   9   82.65    1.64
 -14  -7   4   44.03    1.69
 -14  -6   2    3.80    1.15
 -13  -7   3   13.19    1.53
 -12  -8   9   10.54    1.56
 -11  -6   0    3.44    1.04
 -10  -8   8  169.30    2.06
  -8  -5  -2  439.88    2.17
  -8  -4  -3   42.68    0.84
  -7  -7   2   95.76    1.31
 -17  -6   6   18.62    1.16
 -13  -8   7   36.90    1.69
 -13  -8   9    7.40    1.57
 -13  -6   1   20.78    1.22
 -12  -7   2  196.67    2.25
 -11  -8   9   14.56    1.31
  -9  -8   5   98.02    1.91
  -9  -8   7   10.81    1.23
  -9  -7   1   46.39    1.24
  -9  -4  -3  269.70    1.81
 -16  -7   7    4.02    1.14
 -16  -7  11   10.13    1.07
 -15  -7   5    1.47    1.18
 -13  -8   6    7.67    1.45
 -12  -4  -2   28.80    1.13
 -11  -8   4  222.36    2.51
 -10  -7   1   22.42    1.20
  -9  -8   8  199.15    2.02
  -8  -6  -1    5.62    0.90
 -14  -8   8   51.69    1.68
 -14  -8   9  124.73    2.09
 -13  -8  10    4.22    1.39
 -12  -8  10   81.62    1.62
 -11  -8  10    0.42    1.24
 -10  -5  -2    1.90    0.94
  -9  -6  -1   11.68    0.91
  -7  -7   1   46.74    1.16
 -16  -7   6   44.07    1.37
 -16  -7  12   11.98    1.01
 -15  -5   1    3.65    1.05
 -15  -4   0    1.25    0.99
 -14  -8   7   32.74    1.54
 -14  -7   3    9.40    1.45
 -13  -8   5    4.18    1.37
 -12  -8   4  156.39    2.12
 -10  -8   3   27.58    1.59
 -10  -4  -3   16.49    0.96
  -8  -8   4    6.54    1.20
  -8  -8   7   83.58    1.39
 -17  -4   2    1.68    0.90
 -15  -7   4    7.53    1.18
 -15  -7  13    8.40    0.99
 -14  -8  10   18.45    1.35
 -14  -4  -1   10.82    1.09
 -11  -8   3   63.11    1.82
 -10  -8  10   26.17    1.23
  -9  -8   3    5.40    1.21
  -9  -8   9  111.19    1.56
 -17  -5   3   20.10    1.10
 -15  -8   8   11.10    1.45
 -15  -6   2    8.27    1.13
 -14  -6   1   24.58    1.35
 -13  -8  11   10.91    1.30
 -12  -8  11    4.39    1.22
 -11  -5  -2   14.02    1.07
  -8  -8   8   72.80    1.31
  -6  -6  -1   52.36    0.91
 -16  -7   5   33.59    1.31
 -15  -8   7    9.93    1.25
 -15  -8  10    1.11    1.22
 -14  -8   5   38.84    1.51
 -14  -8  11    1.35    1.22
 -13  -8   4    1.94    1.32
 -13  -5  -1   28.28    1.28
 -12  -8   3   70.88    1.69
 -11  -8  11   87.87    1.55
 -11  -6  -1   39.68    1.23
  -8  -7   0  204.77    1.78
  -7  -8   5   29.22    1.07
  -7  -8   6   17.88    0.95
  -6  -7   1  221.41    1.64
 -13  -6   0   36.68    1.28
 -10  -8   2    2.27    1.20
  -9  -8   2   11.79    1.19
  -7  -7   0  129.10    1.41
 -15  -8   6    0.72    1.15
 -11  -8   2  263.38    2.40
 -11  -7   0  327.49    2.53
  -7  -8   7   61.29    1.11
 -17  -7   6   37.05    1.20
 -16  -8   8   38.24    1.40
 -14  -8   4   57.71    1.57
 -13  -8   3    4.61    1.28
 -13  -8  12    0.68    1.08
 -13  -7   1   18.33    1.43
 -11  -9   6   25.84    2.07
  -9  -6  -2   31.45    1.13
  -9  -5  -3   30.18    1.00
  -8  -6  -2   33.84    0.95
 -16  -7   4    0.49    1.10
 -16  -5   1   33.20    1.17
 -15  -8   5   33.95    1.52
 -12  -9   6    5.11    1.55
 -12  -8   2   24.17    1.38
 -12  -6  -1   23.18    1.14
 -12  -5  -2    4.72    0.95
 -11  -9   5    1.58    1.79
  -7  -6  -2    9.79    0.72
  -7  -4  -4   29.05    0.77
  -6  -7   0   28.00    0.87
 -16  -8   7   10.58    1.19
 -15  -8  12   -1.27    0.96
 -15  -6   1   91.58    1.58
 -15  -5   0   83.76    1.39
 -13  -9   8   11.73    1.48
 -12  -9   5  122.62    2.11
 -12  -9   9   73.93    1.85
 -12  -7   0    2.73    1.25
 -10  -9   8  114.64    1.94
  -9  -8   1  305.69    2.36
  -7  -8   8   25.88    0.91
 -16  -8  11    0.52    0.87
 -14  -6   0  108.26    1.71
 -13  -9   9   24.60    1.46
 -11  -9   4  161.87    2.24
 -11  -9   9    1.14    1.17
 -10  -5  -3   21.18    0.98
  -9  -9   7   51.48    1.50
  -9  -7  -1   31.01    1.16
  -8  -8   1   42.23    1.27
  -6  -8   3   32.61    1.00
  -6  -8   6  100.22    1.20
  -6  -6  -2  181.60    1.40
 -16  -8   6   65.71    1.45
 -15  -8   4    0.96    1.28
 -14  -9   7    9.73    1.35
 -14  -9   9    2.09    1.35
 -14  -8   3   14.29    1.27
 -13  -8   2   26.00    1.57
 -12  -9   4   46.68    1.87
 -12  -9  10    2.92    1.33
 -11  -8   1   33.09    1.40
 -10  -9   9  158.85    1.94
 -10  -7  -1   10.88    1.08
  -7  -7  -1  324.60    2.04
 -16  -7   3    5.22    1.07
 -15  -7   2   14.20    1.15
 -14  -7   1  120.95    1.74
 -13  -6  -1   10.09    1.22
 -11  -6  -2   18.32    1.15
  -9  -9   8  468.98    2.76
  -8  -9   6    4.34    1.12
  -7  -8   1   57.37    1.25
 -16  -8   5    1.00    1.12
 -14  -9  10    3.47    1.17
 -13  -7   0  188.48    2.11
 -11  -9   3   33.07    1.54
 -11  -9  10   88.84    1.57
  -8  -9   4   15.92    1.38
  -8  -9   7   17.70    1.23
 -15  -9   7    4.22    1.32
 -15  -9   8    0.13    1.25
 -15  -9   9    3.55    1.15
 -14  -9   5   31.23    1.42
 -12  -9   3  105.82    2.09
  -9  -8   0  149.39    1.81
  -8  -8   0   94.16    1.49
  -6  -7  -1  259.48    1.76
 -15  -9  10    9.84    1.16
 -13  -9  11   11.96    1.11
 -10  -9   2   13.81    1.38
 -10  -9  10    4.02    1.11
  -9  -9   2    4.23    1.50
  -9  -9   9  253.84    2.06
  -8  -6  -3   14.83    0.96
  -5  -8   4  109.72    1.24
 -16  -6   1    1.36    0.96
 -14  -9  11    1.52    1.02
 -12  -7  -1    4.46    1.22
 -12  -6  -2    4.43    1.14
 -11  -9   2   19.36    1.42
  -8  -9   8   34.82    1.12
  -7  -9   5   44.37    1.25
  -7  -8   0   61.18    1.26
 -16  -8   4    4.10    1.03
 -15  -6   0   12.57    1.01
 -14  -9   4    2.60    1.19
  -8  -9   2   -0.54    1.20
  -8  -5  -4    9.26    0.75
  -7  -5  -4   22.90    0.76
  -5  -8   2   39.34    1.05
 -15  -9   5    7.59    1.18
 -15  -7   1    9.97    1.08
 -14  -6  -1   15.98    1.14
 -12  -9   2  105.80    1.86
 -10  -7  -2   24.08    1.28
 -10  -6  -3  170.11    1.78
  -7  -9   7   25.53    1.09
  -7  -7  -2   24.52    0.95
  -6  -6  -3  286.21    1.73
  -5  -7  -1   71.59    1.02
 -14  -7   0   17.99    1.15
 -12 -10   8    5.35    1.69
 -12  -8   0  302.67    2.49
 -10  -9   1   30.09    1.43
  -9  -9   1    1.15    1.22
  -6  -8   0   50.55    1.12
  -6  -5  -4   89.44    1.00
 -14  -9   3   18.07    1.44
 -13 -10   8    6.36    1.39
 -12 -10   5   20.58    1.60
 -11 -10   8    2.71    1.37
  -8  -9   1  502.13    2.98
  -8  -9   9   72.87    1.27
  -8  -8  -1  160.52    1.78
  -5  -8   1  184.71    1.56
 -16  -8   3    7.91    1.06
 -15  -8   2   14.04    1.13
 -14  -8   1   15.35    1.20
 -13 -10   9   64.14    1.71
 -13  -9   2   41.99    1.47
 -13  -7  -1   24.14    1.21
 -12 -10   9   16.00    1.39
 -11 -10   4   -0.56    1.48
 -11  -6  -3   27.52    1.18
 -10 -10   4  152.35    2.36
 -10 -10   8    5.61    1.39
  -7  -8  -1  170.44    1.71
  -6  -9   3   38.47    1.29
  -6  -9   5  162.80    1.60
 -14 -10   7   18.20    1.47
 -14 -10   8   10.92    1.37
 -13  -8   0    5.81    1.27
 -11 -10   9   35.50    1.41
 -11  -8  -1    2.56    1.29
  -9 -10   7    4.86    1.26
  -7  -9   1    9.69    1.14
 -16  -9   5    4.50    1.00
 -14 -10   9    8.03    1.23
 -11 -10   3   90.03    1.91
 -10 -10   3   56.20    1.77
  -9 -10   3   46.73    1.96
  -6  -9   2    5.26    1.00
  -6  -9   6  288.41    1.93
 -14 -10   5   -0.18    1.33
 -13 -10   4    4.82    1.29
 -12 -10   3   48.03    1.83
 -12 -10  10   12.65    1.19
 -12  -7  -2   19.48    1.29
 -10 -10   9    2.39    1.13
 -10  -9   0    4.51    1.24
  -9 -10   8  100.63    1.68
  -9  -9   0   20.14    1.31
  -8 -10   4   98.26    1.92
  -8 -10   6   33.30    1.35
  -8  -9   0    4.42    1.16
  -8  -7  -3    6.59    1.02
  -6  -8  -1  286.27    1.99
  -4  -8   3   32.52    0.79
  -4  -8   4  381.28    1.86
 -16  -7   1    7.11    0.97
 -15 -10   7   38.41    1.36
 -15 -10   9   27.06    1.25
 -15  -9   3    8.48    1.13
 -15  -7   0   16.45    1.11
 -12  -8  -1  131.02    1.94
 -11 -10  10    1.45    1.15
  -8 -10   3   28.81    1.60
  -8  -6  -4   59.89    1.17
  -7  -7  -3   49.14    1.09
  -7  -6  -4   50.89    1.06
  -4  -8   2   39.56    0.86
 -15  -8   1    5.38    1.12
 -14  -7  -1    2.79    1.08
 -11 -10   2    3.35    1.37
 -10 -10   2   80.30    1.83
 -10  -7  -3   19.35    1.16
  -9 -10   2   38.98    1.61
  -9  -8  -2    2.29    1.04
  -9  -6  -4   10.57    1.00
  -8 -10   7   19.50    1.15
  -7  -9   0   14.86    1.16
  -6  -9   1  205.82    1.92
 -14 -10   4    7.02    1.22
 -13 -10   3   78.92    1.68
  -6  -7  -3   28.52    0.88
  -4  -8   1  239.87    1.62
 -16   1   7    2.24    1.20
 -15   0   7    5.51    1.16
 -14   2   0   25.80    1.40
 -13  -1   4  170.97    1.95
 -13   5  -3   22.78    1.38
 -12   0   0   55.79    1.43
 -12   5  -4   36.76    1.28
 -11  -2   4    1.51    0.78
 -11   0  -1   96.28    1.56
 -10   1  -3   51.48    1.44
 -16   1   8   21.23    1.26
 -16   5   1   41.09    1.32
 -15   4   0    0.75    1.13
 -13   1   0   35.01    1.42
 -13   2  -1   12.32    1.50
 -11  -2   5   59.68    1.19
 -11   2  -3   88.99    1.60
  -9  -1  -1   24.97    0.91
  -8   2  -5   16.78    0.89
 -17   4   4   32.65    1.32
 -15   2   2    1.95    1.22
 -15   3   1   29.17    1.60
 -12   6  -4   30.54    1.39
 -11  -2   6    2.42    0.76
 -11   1  -2   35.31    1.30
 -11   7  -5   64.71    1.46
 -10  -2   3    3.61    0.85
 -10  -1   0   11.79    0.92
  -7   3  -6  115.85    1.36
 -16   3   3   35.78    1.38
 -16   4   2    6.39    1.13
 -15   1   4   30.22    1.37
 -15   8  -1   28.90    1.08
 -14   0   4  179.02    2.02
 -11   8  -5    7.12    1.09
  -8   4  -6  244.72    1.97
 -17   6   3    3.40    1.04
 -16   2   5    0.24    1.31
 -16   6   1   -0.72    1.04
 -14   7  -2    1.10    1.06
 -13  -1   6   13.82    0.99
 -12   7  -4    2.84    1.16
 -11   4  -4   21.10    1.19
 -17   3   7    8.32    1.24
 -14   2   1   10.15    1.56
 -13   7  -3   11.21    1.13
 -13   9  -3   18.20    1.09
 -12   8  -4   27.74    1.24
 -10  -2   4  280.22    1.87
 -10   5  -5  187.30    2.00
  -9   2  -4   50.87    1.33
  -9   6  -6    2.11    0.91
 -17   5   4    0.52    1.06
 -15   2   3   28.14    1.63
 -13   8  -3    8.32    1.05
 -10   3  -4    9.68    1.09
  -7   2  -5  214.75    1.67
  -6   3  -6    0.30    0.72
 -16   2   6  106.66    1.77
 -15   4   1   40.84    1.48
 -14   0   6    6.41    1.22
 -12  -1   4  138.45    1.66
 -10  -1   1  133.70    1.50
  -9  -1   0  281.44    1.90
 -17   4   6   19.53    1.39
 -16   2   7   59.14    1.60
 -16   4   3   37.29    1.41
 -13   2   0   91.81    1.79
 -12   3  -2    1.62    1.20
 -10   2  -3  304.53    2.35
  -9   4  -5    9.26    0.99
  -7   4  -6  105.24    1.37
 -17   6   4    0.62    1.01
 -16   2   8  144.59    1.93
 -15   1   7   39.34    1.49
 -12  -1   5   35.47    1.20
 -12   2  -1    1.66    1.22
 -12   5  -3   31.63    1.35
 -11   1  -1   18.32    1.20
 -10   6  -5   16.05    1.17
 -16   6   2   45.16    1.39
 -15   1   8   13.05    1.23
 -15   7   0   27.90    1.30
 -14   6  -1   22.46    1.49
 -12  -1   6    4.01    0.98
 -11  -1   3   17.41    0.95
  -8   0  -2   26.83    0.88
 -17   4   7   39.24    1.35
 -17   7   4    1.80    0.93
 -15   5   1    2.40    1.22
 -14   1   4   33.26    1.57
 -14   2   2   80.43    1.76
 -14   3   1    3.42    1.57
 -11   6  -4    2.98    1.24
 -10   7  -5   13.10    1.24
 -17   4   8    0.10    1.19
 -17   4   9   53.18    1.39
 -16   4   4    9.33    1.45
 -16   5   3    4.72    1.16
 -15   3   3   44.14    1.76
 -13   4  -1  269.67    2.55
 -11   0   1   74.99    1.42
 -10   8  -5   28.51    1.31
  -9   0  -1  164.36    1.59
  -9   3  -4  146.44    1.80
  -8   1  -3  132.71    1.43
  -8   6  -6    3.41    0.92
 -17   5   6    4.45    1.11
 -17   6   5   31.36    1.27
 -16   3   6   31.55    1.56
 -15   4   2    2.39    1.30
 -14   8  -1    3.05    1.17
 -13   0   5   19.80    1.30
 -12   4  -2    9.58    1.29
 -10   0   0    1.41    0.89
  -9  -1   1   11.06    0.79
  -9   5  -5    6.13    0.96
 -13   2   1   36.05    1.51
 -13   7  -2   85.28    1.63
 -13  10  -2    8.91    1.05
 -12   1   1   57.80    1.49
 -12   7  -3   23.25    1.46
  -9   1  -2  145.65    1.69
  -9   2  -3   65.65    1.44
  -8   4  -5    0.40    0.96
  -7   3  -5   59.52    1.08
  -7   5  -6    6.34    0.95
 -17   5   7    1.95    1.17
 -17   7   5    6.92    1.11
 -16   6   3    0.63    1.13
 -14   1   5   47.59    1.44
 -14   2   3   16.60    1.39
 -13   9  -2   61.28    1.48
 -12   3  -1    9.01    1.52
 -11   1   0   20.97    1.37
 -11   8  -4    0.67    1.08
 -11   9  -4   31.91    1.32
 -16   5   4   -0.04    1.38
 -12   2   0  243.20    2.36
 -12   9  -3    3.19    1.12
 -11  -1   5  442.16    2.43
 -11   3  -2    7.87    1.20
 -10  -1   3  145.99    1.49
 -10   1  -1  201.60    1.92
 -10   2  -2  143.99    1.78
 -10   5  -4   23.83    1.23
 -17   5   8    1.99    1.19
 -16   3   8   65.74    1.56
 -16   3   9   15.63    1.28
 -14   1   6   12.72    1.19
 -14   4   1   65.35    1.78
 -11  -1   6   87.44    1.35
 -11   5  -3  132.05    2.03
  -9   6  -5  196.83    1.95
 -17   5   9   99.12    1.57
 -15   2   7   97.65    1.81
 -15   4   3    7.31    1.36
 -14   1   7   47.43    1.48
 -12   0   4  106.70    1.57
 -17   6   7    6.98    1.12
 -16   4   6   26.84    1.37
 -16   8   3    7.45    1.12
 -15   2   8    6.73    1.32
 -14   1   8   30.82    1.34
  -9   7  -5    8.99    1.20
  -8   3  -4    1.51    0.80
  -6   3  -5   78.55    1.08
 -16   6   4   66.68    1.59
 -15   3   5    6.00    1.54
 -13   3   1    0.41    1.33
 -13   6  -1   11.22    1.36
 -10  -1   4  463.69    2.38
 -10   6  -4   41.00    1.34
  -8   1  -2  461.99    2.39
  -8   5  -5   25.79    1.02
 -16   4   7   21.68    1.52
 -14   5   1    2.58    1.36
 -14  10   0   27.63    1.19
 -12   6  -2    5.06    1.26
 -11   4  -2    0.28    1.41
  -9   8  -5   25.21    1.32
  -7   4  -5  147.26    1.50
 -17   6   9   11.55    1.07
 -17   6  10    8.12    1.06
 -17   7   7    2.24    1.05
 -16   7   4    0.78    1.29
 -14   3   3   39.21    1.59
 -14   9   0   -2.09    1.13
 -13  11  -1   11.23    1.04
 -12   3   0    2.86    1.51
 -11   1   1    1.95    1.04
 -10   7  -4   71.61    1.63
 -16   4   8   34.15    1.43
 -16   4   9   -0.15    1.25
 -15   3   6   98.11    1.98
 -14   2   5   19.63    1.37
 -13   1   5   82.20    1.58
 -12   0   6   33.23    1.20
 -12  11  -2    4.14    1.08
 -10   1   0    3.88    0.95
 -17   7   8   21.57    1.15
 -16   5   6   13.79    1.32
 -16   6   5    1.70    1.18
 -16   8   4    3.28    1.15
 -16   9   4   33.12    1.35
 -13   5   0   85.14    1.85
 -13   9  -1   11.59    1.38
 -11   7  -3   69.64    1.61
 -10   9  -4    3.03    1.24
  -9   5  -4  155.70    1.82
 -15   3   7   40.83    1.65
 -14   2   6   68.48    1.76
 -12  10  -2   11.28    1.35
 -11   8  -3   45.92    1.65
  -9   0   1  698.41    2.88
 -16   5   7   20.80    1.53
 -15   6   3   43.64    1.61
 -13   1   6   32.59    1.27
 -13   3   2  362.77    2.92
 -13   4   1   25.27    1.52
 -12   9  -2    1.96    1.22
 -10   5  -3   33.63    1.34
 -15   3   8  240.30    2.40
 -15   3   9   31.01    1.48
 -15   5   4    4.97    1.38
 -14   2   7   43.79    1.55
 -14   4   3    0.65    1.65
 -13   1   7   22.33    1.31
 -13   6   0   37.62    1.80
  -6   4  -5    8.41    0.78
 -16   5   8   17.96    1.48
 -16   8   5    0.79    1.25
 -14   8   1   14.32    1.56
 -13   1   8  210.00    2.06
 -12   1   4  180.63    1.97
 -12   4   0    5.36    1.35
  -9   4  -3  242.23    2.20
 -16   5   9   87.18    1.81
 -15   4   6    8.26    1.53
 -11   0   5  615.18    2.92
 -10   1   1   55.87    1.25
  -8   1  -1  964.50    3.33
 -16   6   7   46.86    1.69
 -15   8   3    4.90    1.23
 -14   3   5   76.30    1.78
 -14   6   2    4.95    1.68
 -11   2   1   42.82    1.36
 -10   6  -3  166.89    2.01
  -8   2  -2    4.96    0.81
 -15   5   5    2.24    1.40
 -13   3   3    3.86    1.34
 -11   3   0   50.46    1.49
  -8   5  -4    6.39    1.08
 -16   6   8   10.84    1.50
 -15   4   7  145.78    2.10
 -14   4   4    6.68    1.44
 -14   5   3   40.58    1.69
 -13   2   5    3.56    1.22
 -10   2   0    3.90    1.01
 -16   6   9   -0.36    1.25
 -16   6  10   14.56    1.32
 -16   9   6    3.03    1.11
 -15   4   8   21.08    1.58
 -15   7   4    8.43    1.37
 -14   3   6   20.98    1.40
 -14   7   2   65.38    1.79
 -12   2   3  312.72    2.53
 -12   5   0  132.77    2.07
 -11   7  -2  142.08    2.02
 -10   7  -3   20.12    1.31
  -7   4  -4   27.34    0.93
 -15   4   9   86.34    1.85
 -15   4  10   -0.05    1.32
 -13   6   1   18.02    1.53
 -11  11  -2  156.08    1.97
  -9   5  -3   20.13    1.15
  -9   9  -4   89.19    1.63
  -6   5  -5    2.03    0.82
 -16   7   8    4.22    1.38
 -15  10   4    1.65    1.23
 -14   3   7  211.84    2.39
 -12   3   2   32.09    1.45
 -11   9  -2    4.92    1.40
 -11  10  -2    1.25    1.33
 -10   1   2  236.07    1.94
 -10   9  -3   59.26    1.70
  -7   7  -5   20.93    1.13
 -16   7  11   12.23    1.18
 -16   9   7   16.16    1.21
 -15   9   4   11.52    1.35
 -14   6   3   14.98    1.52
 -13   3   4  110.18    1.91
 -12   1   7    5.59    1.07
 -11   2   2  185.52    1.97
  -7   3  -3   35.37    1.01
 -16   7  10    0.64    1.23
 -15   5   7    3.52    1.31
 -15   7   5    1.45    1.57
 -14   3   8  105.59    1.86
 -13   2   7   42.94    1.48
 -13   4   3   79.16    1.83
 -13   5   2  145.17    2.18
 -12   1   8   11.78    1.12
 -11   1   4   34.34    1.14
 -11   4   0    0.89    1.21
 -16   9   8   23.49    1.20
 -14   3   9  148.21    1.93
 -13   2   8    2.60    1.22
 -13  11   1    3.35    1.18
  -9   6  -3    5.80    1.24
 -16   8   9    5.80    1.15
 -16   8  10    8.38    1.18
 -15   5   8   64.16    1.65
 -15   8   5   31.32    1.68
 -14   4   6   72.94    1.93
 -13   2   9   12.65    1.25
 -13   8   1  179.03    2.33
  -6   6  -5  163.25    1.58
 -15   5   9   69.69    1.80
 -15   5  10   52.94    1.60
 -15   9   5    2.79    1.28
 -14   8   3   14.21    1.68
 -13   3   5  178.53    2.15
 -13   6   2   23.91    1.80
 -12   3   3    4.24    1.43
 -12   7   0    2.14    1.38
 -10   3   0   18.31    1.13
  -9   2   0   24.34    0.98
  -8   7  -4    3.16    0.95
 -15   7   6    1.50    1.31
 -14   6   4    1.83    1.43
 -14  10   3   34.50    1.58
 -12   4   2  256.46    2.48
 -12  11   0   -0.26    1.38
 -11  12  -1    0.71    1.13
 -10  12  -2   20.27    1.36
 -14   4   7   25.96    1.45
 -13   4   4    5.56    1.34
 -12  10   0   22.92    1.58
 -11   2   3   18.07    1.11
 -10   7  -2   23.36    1.51
  -9   7  -3   23.05    1.23
  -8   5  -3  273.24    2.13
 -15   8   6    2.83    1.26
 -13   3   6  594.53    3.39
 -13   7   2    3.46    1.50
 -13  12   2   47.90    1.40
 -11  11  -1    7.14    1.38
  -8   9  -4   22.77    1.31
 -15   6   9  172.33    2.29
 -15   9   6    6.25    1.34
 -14   4   8   85.93    1.73
 -12   2   6  113.01    1.73
 -11   1   6   45.58    1.12
 -11   3   2   49.92    1.39
 -11  10  -1  202.21    2.42
 -10   5  -1  227.30    2.19
 -10   8  -2   37.24    1.63
 -10  11  -2    2.16    1.35
  -9   8  -3   92.98    1.63
  -7   6  -4   49.61    1.18
  -6   7  -5  131.91    1.48
 -15   6  10   45.30    1.62
 -14   4   9    3.17    1.42
 -14   4  10  253.40    2.39
 -14   6   5    5.47    1.42
 -13   3   7   72.91    1.70
 -11   9  -1   26.13    1.43
 -10   9  -2   62.17    1.76
 -10  10  -2  134.21    2.05
  -9  10  -3   96.47    1.73
 -13   6   3    8.26    1.45
 -13   9   2   44.71    1.64
 -11   1   7  166.79    1.62
 -11  13   0   14.90    1.25
 -15   9   7    3.53    1.29
 -15  10   7   30.22    1.36
 -14   5   7  207.95    2.45
 -13   3   8  149.82    1.98
 -13   5   4   24.46    1.50
 -11   1   8   38.91    1.15
  -8   6  -3    9.72    1.14
 -15   7   9    5.48    1.30
 -15   7  11    8.78    1.25
 -14   7   5   12.08    1.45
 -13   3   9   39.31    1.44
 -12   2   8   61.79    1.41
  -9   6  -2   23.77    1.35
  -7   7  -4   26.93    1.12
 -13   7   3    6.46    1.45
 -12   3   5   88.61    1.74
 -12   8   1   25.01    1.52
 -12  11   1    5.12    1.30
 -11  12   0   21.71    1.47
 -15   8   9    6.70    1.47
 -15   8  11   23.93    1.34
 -14   5   8   15.56    1.37
 -14  11   5    1.06    1.30
 -13   4   6    3.79    1.27
 -12   9   1   66.32    1.77
 -12  13   2   -0.17    1.15
 -11   3   3   72.18    1.45
 -10   1   5   28.76    0.94
 -15   9   9    8.53    1.31
 -14   5   9  322.47    2.68
 -14   5  10   19.67    1.48
 -14  10   5    0.12    1.45
 -13   5   5    3.16    1.57
 -13   6   4   14.04    1.47
 -11   4   2   14.91    1.22
 -10   2   3    2.10    0.81
  -8   7  -3    5.73    1.00
  -7   5  -3   64.92    1.20
 -15   9  10    9.77    1.30
 -14   6   7    3.56    1.32
 -13   4   7    8.52    1.40
 -13  10   3   91.41    1.86
 -12   4   4   10.31    1.27
 -11  11   0   13.55    1.42
 -10  14   0   44.12    1.33
  -9   7  -2    3.69    1.08
  -9  12  -2    2.53    1.12
 -10   1   6  351.67    2.12
  -8   5  -2  450.54    2.52
  -8   8  -3    2.53    1.13
  -8  11  -3   88.24    1.74
  -6   6  -4  109.54    1.34
 -14   8   6    2.98    1.37
 -14  11   6    2.33    1.33
 -13  12   4    1.98    1.26
 -11  13   1    0.06    1.27
 -10   3   2   17.24    1.02
 -10   4   1   30.12    1.19
 -10   8  -1  102.50    1.80
  -9   2   2  281.83    1.96
  -9   8  -2    2.09    1.29
  -9  11  -2   15.03    1.41
 -14   9   6    2.55    1.30
 -13   4   8   67.51    1.54
 -11   3   4   48.08    1.29
 -10  10  -1   41.18    1.51
  -9   9  -2  123.68    1.93
  -9  10  -2    0.35    1.27
  -8   9  -3   71.82    1.47
  -8  10  -3    4.50    1.15
 -14   6   9    1.58    1.23
 -14   6  10    3.62    1.43
 -14   6  11    5.69    1.21
 -13   4   9   21.68    1.24
 -13   4  10    1.44    1.22
 -13   6   5    7.45    1.39
 -13  11   4    2.46    1.44
 -12   3   7    3.70    1.04
 -10   1   7    2.70    0.74
  -9   4   0   89.74    1.38
 -14   7   8   43.00    1.75
 -14  11   7   17.13    1.37
 -12  10   2  144.28    2.14
 -11   4   3  200.20    2.03
 -11   7   1  238.65    2.41
 -11  14   2   16.32    1.13
  -7   6  -3  288.49    2.00
 -12   3   8   87.92    1.46
  -9  13  -1   15.11    1.31
  -8   6  -2   20.97    1.01
  -6   7  -4   31.23    0.94
 -14   7  11   48.30    1.58
 -12   3   9    8.22    1.04
 -11   2   8    4.57    0.87
 -11  11   1   55.61    1.78
 -14  11   8    3.94    1.17
 -13   5   8  174.23    2.21
 -12   4   6   17.57    1.24
 -12   7   3   30.34    1.54
 -12  12   3    0.24    1.33
 -11   9   1   13.60    1.67
 -10   7   0    7.26    1.23
 -10  12   0    3.73    1.42
 -10  14   1    1.04    1.12
 -14   8   9   96.23    1.97
 -14   8  12   82.28    1.68
 -13   8   5    4.57    1.42
 -11   6   2   58.79    1.56
  -9   2   3  285.97    1.86
  -9   7  -1    8.07    1.30
  -7   7  -3   15.99    0.93
 -14   8  11    0.90    1.36
 -14  11  10   16.02    1.24
 -13   5   9   36.63    1.36
 -13   5  10   42.87    1.55
 -13   9   5   12.41    1.46
 -12  13   4    0.75    1.24
 -11   4   4   12.03    1.29
  -9   5   0  364.38    2.37
  -9  12  -1    1.70    1.24
  -9  14   0    1.94    1.17
  -8   7  -2    0.43    0.92
 -14   9  10    3.17    1.33
 -14  10   9    8.85    1.30
 -14  10  10   68.22    1.68
 -14  10  11    0.06    1.15
 -13   6   7    6.83    1.32
 -12   4   7   27.14    1.38
 -12   9   3  105.45    2.00
 -11  14   3   39.99    1.42
 -10   9   0    3.59    1.44
 -10  10   0   28.13    1.62
  -7   8  -3  161.75    1.77
 -11  12   2    2.39    1.47
  -9   4   1  799.35    3.22
  -9   8  -1  133.08    1.82
  -9  11  -1   20.88    1.34
  -8   8  -2   50.23    1.41
 -12   4   8   68.15    1.56
 -12  12   4   12.97    1.49
 -10  13   1   49.32    1.55
  -9   9  -1   67.33    1.55
  -9  10  -1    6.46    1.23
  -9  15   1   13.55    1.16
  -8   9  -2   33.72    1.38
  -7   9  -3    9.02    1.00
  -7  10  -3   14.20    1.14
 -13   9   6   28.51    1.55
 -13  10   6   23.76    1.48
 -13  12   7   13.09    1.34
 -12   6   5   71.47    1.85
 -11   8   2  273.20    2.57
 -10   3   4   16.91    0.97
  -8   4   0  118.94    1.35
 -13   6   9  135.29    1.95
 -13   6  10   48.23    1.60
 -13   6  11  130.94    1.95
 -12   4   9   12.80    1.11
 -12   4  10   12.24    1.19
 -12  13   5   11.04    1.26
 -11   3   7   -0.11    0.89
 -11   6   3   28.94    1.37
 -11  10   2    2.77    1.60
 -10   4   3   30.26    1.25
 -10   5   2   86.15    1.48
 -10  14   2    2.35    1.29
  -5   7  -4   26.19    0.90
 -13   7   8  102.25    2.03
 -13   8   7   36.53    1.59
 -13  11   7    5.32    1.46
 -12   9   4   44.69    1.68
 -12  10   4    2.45    1.64
 -11   5   4   49.59    1.39
 -10   2   7  167.74    1.51
 -10   7   1   60.30    1.51
 -10  12   1    1.11    1.24
  -8  13  -1   56.61    1.62
 -13   9   7    6.97    1.62
 -13  10   7   18.05    1.65
 -13  12   8   -0.15    1.16
 -11   3   8   24.00    0.99
 -12   6   6    4.16    1.50
 -12   7   5  104.97    1.90
 -11   3   9   71.07    1.36
 -11   7   3   44.28    1.52
 -10   2   8  129.77    1.42
 -10   8   1  156.32    2.03
  -9   5   1  171.96    1.72
  -9   7   0   62.25    1.56
  -5   8  -4    3.88    0.83
 -13   7  10   48.16    1.54
 -13  10  13  109.32    1.64
 -13  12   9   28.67    1.29
 -12  13   6   25.79    1.36
 -10   3   5   61.82    1.16
 -10   6   2   28.05    1.41
  -9   3   3  102.70    1.28
 -13   8   9    8.38    1.52
 -13  10   8   17.65    1.37
 -12   5   8   30.46    1.31
 -12   8   5   21.31    1.50
  -9   4   2    3.06    0.81
  -9  15   2    6.52    1.11
  -8  12  -1   -0.63    1.37
 -13   8  10   11.18    1.50
 -13   8  11   18.27    1.49
 -13  11  12    1.25    1.02
 -12   5   9    2.54    1.22
 -12   5  11   48.45    1.50
 -12   9   5  166.74    2.26
 -12  10   5   21.83    1.52
 -11   5   5   44.08    1.34
 -11   6   4   41.83    1.43
 -11  11   3    3.25    1.37
 -11  13   4  108.44    1.92
 -10   4   4  117.65    1.50
 -10   5   3    6.32    1.18
  -8   5   0   75.21    1.21
  -8  14   0   64.80    1.53
  -6   8  -3   29.28    1.04
 -13   9   9   23.06    1.42
 -13  10  12   13.82    1.18
 -13  11  10    1.13    1.15
 -13  11  11   -0.68    1.09
 -12   5  10  256.23    2.28
 -12   6   7   16.68    1.30
 -12   7   6   12.66    1.37
 -12  12   6   18.86    1.34
 -12  13   7   61.71    1.61
 -11   4   7   42.78    1.34
 -11  14   5    7.21    1.14
 -10  14   3    5.03    1.24
  -9   9   0   19.22    1.31
  -9  10   0   -0.46    1.20
  -8  11  -1    4.87    1.37
 -13   9  10    6.53    1.31
 -13   9  11   10.46    1.29
 -13  10  10   18.29    1.41
 -13  10  11   86.81    1.70
 -10   7   2  111.46    1.75
 -10  12   2  162.38    2.17
  -9   6   1    2.39    0.97
  -9  13   1    1.21    1.41
  -8   9  -1   49.41    1.49
  -8  10  -1   25.99    1.44
  -8  15   1    4.08    1.18
  -7  11  -2  105.58    1.71
  -6  10  -3   20.66    1.18
 -12   6   8  155.17    2.11
 -12   8   6   56.73    1.68
 -11   7   4  279.11    2.48
 -11  12   4    1.78    1.31
  -7   9  -2  162.97    1.77
 -12   9   6    7.25    1.43
 -12  12   7    1.64    1.41
 -12  13   8    7.42    1.19
 -11   4   8   19.86    1.07
 -11   6   5  215.62    2.27
 -11  14   6    1.26    1.20
 -10   8   2    1.10    1.23
  -8  13   0   15.94    1.46
  -7  15   0   12.31    1.25
 -12   6   9   16.53    1.26
 -12   6  11    2.93    1.28
 -12  13   9    4.48    1.23
 -11   4   9  111.02    1.62
 -11   8   4  309.84    2.66
 -11  11   4   35.64    1.59
 -10   3   7    2.54    0.87
 -10   6   3  157.86    1.83
  -9   5   2    7.57    0.89
  -9  12   1   42.38    1.70
  -9  14   2    3.73    1.26
  -8   6   0  538.30    2.67
 -12   6  10    4.11    1.11
 -12   8   7   38.81    1.56
 -11  10   4    1.19    1.39
 -10   5   4  350.68    2.36
  -9   4   3    4.71    0.80
  -9  15   3   10.08    1.17
  -7   6  -1  469.08    2.36
  -7  13  -1    3.99    1.20
 -12  12   8    4.79    1.28
 -10   3   8    7.90    0.88
 -12   7  12   41.57    1.50
 -12  11  13   38.23    1.28
 -12  12   9    0.16    1.29
 -11  12   5   61.61    1.69
 -11  14   7  135.17    1.86
 -10   7   3  103.21    1.68
 -10  12   3    5.85    1.36
  -8   5   1 1034.91    3.43
  -8  12   0    7.88    1.24
  -8  14   1   -0.93    1.17
  -5   7  -3    4.59    0.70
 -12   7  10   17.96    1.49
 -12   7  11  161.43    2.10
 -11   6   6    7.18    1.19
 -10   3   9   18.61    0.86
  -9  13   2   47.60    1.70
  -7  12  -1    0.10    1.35
  -6  12  -2    7.09    1.24
 -12   8  12  156.95    2.09
 -12  10   8   12.20    1.40
 -12  10  13    0.85    1.01
 -11   5   8  118.45    1.64
 -11   8   5   12.34    1.36
 -11  11   5   -1.22    1.36
 -11  14   8    5.05    1.15
 -10   4   6   76.36    1.27
 -10  13   4    0.98    1.46
  -9   6   2   92.85    1.42
  -8   4   2   91.67    1.17
  -8  11   0    7.56    1.40
  -7   7  -1  329.98    2.09
  -6   7  -2    3.25    0.71
 -12   8   9   13.26    1.32
 -12   8  11    3.03    1.40
 -12  11  10   16.61    1.45
 -12  11  11    1.74    1.35
 -12  11  12    0.18    1.05
 -11   9   5    0.64    1.34
 -10   5   5  171.92    1.84
 -10   9   3   86.95    1.93
 -10  14   5   12.10    1.33
  -9  14   3   60.54    1.74
  -9  15   4    1.74    1.25
  -8  10   0   78.10    1.69
  -7   5   0  170.59    1.45
  -6  14  -1   -2.19    1.13
  -5   8  -3   69.07    1.16
 -12   9   9   81.18    1.75
 -12  10  12   23.20    1.34
 -11   5   9    1.49    0.98
 -11   5  10   34.22    1.31
 -11   5  11   47.03    1.38
 -11   6   7  536.11    3.06
 -11   7   6    9.03    1.24
 -11  12   6   14.40    1.40
 -11  13   7    1.85    1.25
  -9   4   4   23.68    0.89
  -9   5   3   40.76    1.07
  -9  12   2    4.17    1.52
  -8   9   0    4.40    1.10
  -8  13   1   14.53    1.46
  -7  11  -1    6.43    1.11
  -7  15   1    8.15    1.25
  -7  16   2    0.57    1.08
  -6  11  -2    7.41    1.23
  -5  10  -3   64.04    1.30
 -12   9  10    0.61    1.24
 -12   9  11  129.31    1.96
 -12  10  11    8.81    1.29
 -10   4   7    5.99    0.97
  -8   6   1   40.59    1.05
  -7   9  -1   27.22    1.24
  -7  10  -1    4.82    1.19
  -6   8  -2  322.00    2.05
  -5   9  -3   37.04    1.00
 -11   8   6    7.14    1.31
 -11  11   6  119.27    2.04
 -11  13   8   80.61    1.78
 -10   7   4  149.46    1.86
 -10  12   4   42.02    1.60
  -9   3   6  176.94    1.48
  -6   9  -2    5.94    0.86
  -6  15   0    7.78    1.14
 -11   6   8  126.79    1.74
 -11  12   7   15.50    1.38
 -10  13   5    8.63    1.32
 -10  14   6    1.46    1.25
  -7  13   0  113.52    1.83
 -11   6   9   17.76    1.32
 -11  13   9   17.87    1.32
 -11  13  11    0.19    1.13
 -10   4   8  448.36    2.44
 -10   6   5    0.75    1.01
  -8  12   1   19.83    1.35
  -8  15   3    5.14    1.21
  -7   6   0   28.64    0.89
  -6  13  -1   66.79    1.64
 -11   6  10    4.59    1.21
 -11   6  11   56.05    1.53
 -11   8   7   22.45    1.59
 -11  11   7    0.25    1.34
 -11  12   8   29.93    1.65
 -10   9   4  234.34    2.36
 -10  10   4  141.55    2.08
  -9   3   7    9.86    0.79
  -9   6   3  314.23    2.18
  -8   7   1   51.78    1.17
 -11   9   7   90.96    2.00
 -11  10   7    4.64    1.37
 -10   4  10   30.33    1.09
 -10  12   5   28.00    1.74
 -10  14   7   -0.84    1.21
  -9   5   4   16.70    0.91
  -8  11   1  295.12    2.64
  -7  12   0  307.72    2.62
 -11   7  12   75.71    1.63
 -11  11   8   63.41    1.88
 -11  11  13   21.24    1.22
 -10   5   7  147.08    1.71
 -10   7   5   25.18    1.25
 -10  13   6    1.30    1.25
  -9  15   6    5.72    1.23
  -7  15   2    3.22    1.22
 -11   7   9    0.97    1.11
 -11  12  11   11.67    1.25
 -10   6   6  602.92    3.10
 -10  11   5  182.99    2.46
 -10  14   8    1.60    1.18
  -9   3   8 1150.62    3.42
  -6  12  -1    5.02    1.13
  -6  14   0    4.52    1.32
 -11   7  11    3.35    1.14
 -11   9   8    6.34    1.35
 -11   9  13    6.20    1.12
 -11  11   9   91.40    1.98
 -11  11  12   27.91    1.42
 -10   8   5   22.26    1.33
 -10  14   9    2.47    1.18
  -9   3   9  114.69    1.27
  -9  11   3    1.59    1.32
  -9  13   4   16.32    1.40
  -9  14   5   31.04    1.43
  -8   6   2   21.30    1.03
  -8  14   3    2.62    1.41
  -7  11   0  242.78    2.25
  -6   7  -1  138.59    1.40
 -11   8   9   37.60    1.43
 -11   8  12   46.39    1.47
 -11  10  12   16.92    1.43
 -10   5   8   58.01    1.23
 -10  12   6  150.95    2.17
 -10  14  10    2.49    1.06
  -9   4   6  314.74    1.94
  -9   8   3    6.58    1.12
  -9  15   7    2.63    1.19
  -7   8   0   83.34    1.32
  -7  10   0    0.34    1.16
 -11   8  10    1.57    1.21
 -11   9   9    5.08    1.29
 -11   9  12   60.78    1.58
  -9   6   4   47.07    1.15
  -9   9   3  268.40    2.36
  -8  12   2   33.06    1.47
  -7  13   1    3.16    1.22
  -6  11  -1   38.35    1.23
  -5  11  -2   24.76    1.23
  -5  15   0    2.53    1.24
  -4   8  -3   85.31    1.11
 -11   9  10  115.31    1.87
 -11   9  11   24.80    1.34
 -10   5   9   20.53    1.01
 -10   5  10   16.66    1.09
 -10   5  11    8.65    1.13
 -10   6   7  215.37    1.98
 -10   7   6  139.22    1.80
 -10  11   6   33.05    1.80
 -10  13   8    4.41    1.44
  -9   5   5  169.12    1.59
  -9  15   8    2.61    1.24
  -8   5   3   41.07    0.95
  -6   8  -1  284.87    1.92
  -6  10  -1   22.85    1.20
  -5   8  -2   13.34    0.84
  -5  16   1    6.29    1.18
  -4   9  -3   75.66    1.17
 -10   8   6  187.22    2.21
 -10  13  12   -0.54    1.10
  -7  14   2    2.66    1.47
  -7  15   3   -0.07    1.35
  -6   9  -1   36.20    1.07
  -6  13   0   35.76    1.52
  -5   9  -2   16.80    0.94
  -5  10  -2   66.52    1.22
 -10   9   6   15.64    1.37
 -10  10   6   29.24    1.51
 -10  11  14    4.94    1.08
 -10  13   9   13.47    1.34
  -9   4   7   37.02    0.95
  -9   7   4    9.66    1.03
  -5  13  -1   13.91    1.30
 -10   6   8  101.40    1.52
 -10  12  13    1.07    1.05
 -10  13  10   13.41    1.32
  -8   9   2    0.49    1.27
  -8  10   2    8.87    1.23
  -7  12   1   59.70    1.57
 -10   6   9   12.70    1.18
 -10  11   7   28.91    1.54
 -10  12   8   29.92    1.49
  -9   6   5   33.04    1.08
  -9   8   4    6.42    1.12
  -9   9   4   67.69    1.73
  -9  10   4  216.58    2.29
  -9  14   7  107.80    1.85
  -6  14   1    2.17    1.37
  -6  16   3    0.91    1.06
 -10   6  11   15.54    1.23
 -10   9   7  106.42    1.99
 -10  10   7    0.98    1.33
 -10  11  13  204.49    2.18
 -10  12   9    3.40    1.50
 -10  12  12   16.54    1.24
  -9   4   8   13.68    0.78
  -9  12   5  166.77    2.23
  -8   6   3   53.70    1.06
  -8  15   6    6.30    1.27
  -7   7   1   48.30    1.04
  -7  11   1  171.85    2.09
  -6  12   0  292.95    2.48
 -10   7   8  221.72    2.10
 -10  12  11   41.92    1.49
  -9   4   9  105.38    1.32
  -9  14   8   -0.43    1.25
  -7  13   2  109.83    1.85
  -5  14   0   -0.22    1.32
 -10   7  12   -0.49    1.21
 -10  10  13    1.31    1.26
  -9   4  10   25.70    0.97
  -9  11   5   11.47    1.41
  -9  14   9   61.12    1.64
  -8  14   5    3.44    1.26
  -7   8   1   60.56    1.20
  -7  10   1    6.83    1.12
  -5  15   1   37.97    1.49
  -5  16   2    7.38    1.12
 -10   7   9    3.39    1.06
 -10   9   8  131.34    1.95
 -10  11   9  110.16    1.92
  -9   5   7    0.59    0.75
  -9  13   7    2.07    1.30
  -8   7   3  338.60    2.17
  -8  15   7  104.59    1.80
  -6  11   0   58.13    1.38
 -10   8   9   38.80    1.56
 -10   8  12    1.98    1.31
 -10  11  11  118.55    1.85
  -9   6   6  266.35    2.00
  -9   8   5   81.93    1.53
  -9  12   6  158.47    2.20
  -6  13   1  167.77    2.15
  -6  16   4   10.09    1.20
  -4  15   0   23.26    1.38
  -4  16   1    8.44    1.22
 -10   8  11    6.38    1.33
 -10   9  12  115.43    1.80
 -10  10  10   21.10    1.54
 -10  10  11   27.25    1.53
  -8   8   3   60.93    1.30
  -8   9   3  104.52    1.62
  -7  12   2   68.99    1.62
  -7  16   7   33.84    1.29
  -6  10   0  200.47    1.87
  -4  11  -2    8.10    1.04
  -8   6   4   38.62    0.99
  -8  14   6  207.37    2.34
  -8  15   9   20.76    1.25
  -6  14   2   94.41    1.88
  -6  15   3   14.06    1.34
  -9   7   6   92.68    1.47
  -9  11  14    1.49    1.11
  -9  12   7  105.03    1.95
  -9  12  13   90.01    1.64
  -9  13   9   25.46    1.40
  -9  13  10    5.64    1.38
  -5   8  -1  229.26    1.67
  -5  10  -1   10.22    0.91
  -3   9  -3    1.33    0.74
  -9   5   9    1.27    0.77
  -9   5  10   13.62    1.00
  -9   5  11   75.05    1.34
  -9   8   6    1.54    1.09
  -9  10   6    3.79    1.30
  -8   5   5  214.90    1.60
  -4  13  -1   11.45    1.12
  -7  15   6   23.76    1.50
  -5  14   1  160.14    2.13
  -5  15   2  119.94    1.96
  -3  17   2    7.05    1.03
  -9   6   8   21.48    1.09
  -9  11  13    5.24    1.32
  -9  12   9   17.18    1.62
  -9  12  12   33.90    1.43
  -8  12   5   70.87    1.94
  -8  14   8   10.31    1.47
  -7   8   2    2.15    0.85
  -7   9   2  533.56    2.80
  -9  10   7    9.33    1.33
  -9  12  11    3.16    1.23
  -8   8   4    8.16    1.00
  -8   9   4   21.29    1.21
  -6  11   1    9.82    1.30
  -6  13   2   42.07    1.59
  -5  12   0   59.07    1.38
  -4  14   0   70.50    1.66
  -4  16   2   45.07    1.38
  -9   6   9  134.70    1.56
  -9   6  11  101.58    1.56
  -9   8   7   14.93    1.17
  -9  10  13    3.66    1.31
  -9  11   8   50.43    1.62
  -8   6   5   34.93    0.96
  -8  13  13   33.28    1.26
  -8  14   9    1.13    1.25
  -8  14  10   51.22    1.52
  -6  14   3    9.62    1.29
  -4  12  -1   12.65    1.16
  -4  15   1   27.20    1.44
  -9   6  10    1.04    0.87
  -9   7   8    7.16    1.03
  -9   8  13   19.06    1.34
  -9   9  13  138.45    1.96
  -9  11   9    7.54    1.57
  -8   4   8  127.92    1.28
  -8  11   5   64.69    1.66
  -8  12  14   26.76    1.21
  -8  13   7    7.37    1.37
  -7   6   3   37.92    0.88
  -6  16   7   -0.64    1.18
  -5  16   4   51.24    1.49
  -3  15   0    6.16    1.23
  -9   7  12   12.29    1.23
  -9   9   8  470.96    3.08
  -9  10   8  115.18    1.88
  -9  11  11    1.80    1.21
  -7  11   3    0.55    1.19
  -7  15   8   13.10    1.27
  -7  15   9    0.87    1.23
  -7  15  10    7.17    1.22
  -5  11   0  625.79    3.12
  -5  13   1    8.25    1.36
  -9   7   9   15.16    1.06
  -9   7  10  186.39    1.96
  -9   7  11    5.22    1.17
  -9   8  12  119.80    1.85
  -9  10  12   13.85    1.32
  -8   4   9    1.12    0.74
  -8   7   5    2.47    0.86
  -8  13   8   14.22    1.39
  -8  13  12    2.31    1.16
  -7  14   6   37.68    1.53
  -6  12   2    5.77    1.42
  -6  16   8   19.41    1.22
  -5  15   3   12.10    1.46
  -3  17   3    1.30    1.04
  -9   8   9  114.88    1.70
  -9   9  12   40.55    1.40
  -9  10  10    1.60    1.22
  -9  10  11  124.64    1.89
  -8   5   7  386.62    2.09
  -8   9   5    2.21    1.10
  -8  11  14   22.10    1.25
  -8  13   9    0.63    1.48
  -7   7   3   96.88    1.24
  -7  10   3    4.48    1.10
  -5  14   2   21.20    1.34
  -5  16   5   36.22    1.47
  -4  11  -1   10.45    1.02
  -4  16   3   -1.67    1.25
  -9   8  10   78.67    1.53
  -9   8  11   84.70    1.54
  -9   9  10    4.36    1.18
  -9   9  11   11.46    1.24
  -8   6   6  505.06    2.45
  -8  11   6    0.93    1.29
  -8  12  13   12.59    1.17
  -5  10   0   42.69    1.12
  -4  13   0   50.45    1.35
  -3  11  -2   45.95    1.08
  -2  17   2   -1.35    0.96
  -7  14  12   49.39    1.41
  -5   8   0    4.12    0.67
  -5   9   0    3.03    0.73
  -8   5   8   16.80    0.90
  -8  10   6   33.35    1.41
  -8  12   8   67.09    1.73
  -8  12  12  155.08    2.10
  -5  12   1   11.20    1.15
  -4  10  -1   28.89    0.94
  -4  14   1   -0.63    1.14
  -4  15   2    0.15    1.21
  -3  10  -2    1.14    0.80
  -8   6   7    5.85    0.93
  -8   8   6  179.73    1.81
  -8  11  13    2.33    1.28
  -8  12   9  106.39    2.07
  -7   6   4    6.09    0.70
  -7  14   8    8.97    1.30
  -7  14  11  128.84    1.86
  -4   9  -1  301.22    1.87
  -3  17   4    1.43    1.01
  -8   5   9   65.65    1.13
  -8   5  11   34.94    1.09
  -8  12  10   56.35    1.62
  -7  12   5    3.92    1.33
  -7  13  13   -0.73    1.13
  -7  14  10   14.77    1.34
  -5  13   2    7.94    1.36
  -4  16   4   19.60    1.46
  -3  14   0    3.26    1.12
  -3  15   1    5.37    1.32
  -8   5  10   19.03    0.85
  -8  10  13   42.39    1.55
  -8  11  12   25.24    1.52
  -7  12  14    2.66    1.10
  -6  13   4    2.20    1.56
  -4  12   0  336.95    2.36
  -7  13   7   14.40    1.45
  -6  15  10   22.30    1.28
  -5  11   1  322.04    2.31
  -5  16   8   33.02    1.34
  -2  17   3    9.22    1.14
  -8   8   7   59.68    1.33
  -8   8  13    1.62    1.21
  -8   9  13   19.29    1.40
  -8  11  11   26.30    1.39
  -7  12   6  141.46    2.22
  -7  13  12    6.70    1.19
  -8   6   9   14.77    0.88
  -8   6  11   10.33    1.06
  -8   7   8    1.17    1.06
  -8  10   8  228.98    2.27
  -8  10  12   86.10    1.65
  -4  13   1   25.87    1.26
  -4  16   5    1.79    1.20
  -8   6  10  315.25    2.07
  -8   7  12    1.87    1.12
  -8   9  12    6.77    1.27
  -8  10  11    2.38    1.38
  -7  12  13   13.19    1.21
  -7  13   9    9.59    1.35
  -5  12   2   -0.11    1.28
  -4  11   0   15.25    0.99
  -4  14   2    5.00    1.21
  -8   7   9   92.47    1.39
  -8   7  11   17.80    1.14
  -8   8  12   29.49    1.26
  -8  10  10   19.58    1.33
  -5  13   3    0.77    1.44
  -5  15   6   68.54    1.64
  -3  13   0    4.54    1.21
  -2  16   2    3.52    1.26
  -8   7  10    3.38    0.94
  -8   8   9    6.35    1.07
  -8   8  11   14.64    1.25
  -8   9  10    3.86    1.15
  -8   9  11   43.19    1.40
  -7   7   5   45.08    1.01
  -7  10  14   24.36    1.30
  -7  12  12    2.50    1.36
  -3  11  -1   65.71    1.17
  -3  15   2   37.69    1.43
  -2  11  -2   64.56    1.19
  -7  11  13    1.26    1.30
  -7  12   8    3.77    1.35
  -6   7   3  106.19    1.18
  -6  13  13   20.20    1.26
  -6  14   8    2.48    1.28
  -6  14   9    4.29    1.45
  -5  15   7    8.60    1.48
  -4  15   4    2.15    1.20
  -4  16   7    4.83    1.28
  -3  16   4    1.23    1.28
  -7   4  10   71.87    1.05
  -7   6   6   73.41    1.15
  -6  12  14   42.43    1.32
  -4  12   1  308.08    2.32
  -4  16   8   20.64    1.32
  -2  14   0   37.89    1.40
  -2  15   1   67.07    1.62
  -2  17   5    4.89    1.11
  -7   5   7  209.33    1.47
  -7  11   7   30.86    1.45
  -7  12  10  137.42    2.01
  -6  12   5  108.93    1.85
  -5  14   5   42.69    1.56
  -4   9   0  113.95    1.24
  -4  14   3    4.52    1.42
  -3  10  -1   96.01    1.25
  -7   7   6  208.94    1.66
  -7   9   6  166.40    1.80
  -7  10  13   10.73    1.36
  -7  11  12  119.74    1.94
  -4   8   0  281.05    1.64
  -2  10  -2   12.44    0.79
  -7  11   8   47.18    1.54
  -3  12   0   43.51    1.18
  -3  15   3    0.30    1.39
  -3  16   5    6.60    1.24
  -2  16   3    0.01    1.15
  -7   5   8  132.86    1.24
  -7   6   7   30.55    0.86
  -7   9  13   19.53    1.33
  -7  11   9   91.96    1.76
  -7  11  11   90.23    1.71
  -6  11  14   64.76    1.51
  -5  14   6    8.81    1.36
  -4  11   1   11.88    1.09
  -3   9  -1   11.96    0.67
  -1  17   4    2.99    1.01
  -7   5   9   86.10    1.13
  -7   5  11    2.35    0.74
  -7   8  13   69.08    1.50
  -7  10  12    2.06    1.14
  -6  12   6    3.26    1.30
  -6  13   9    5.62    1.33
  -6  13  10   40.43    1.50
  -4  15   6    7.87    1.49
  -3  13   1  150.70    1.90
  -3  14   2   92.80    1.79
  -1  16   2   76.81    1.57
  -7   5  10   79.28    1.11
  -7  10   8    9.14    1.21
  -7  10  11   18.78    1.39
  -6   7   4    4.93    0.68
  -6   8   4    4.76    0.78
  -5  13   5    5.44    1.53
  -2  15   2   63.59    1.61
  -7   6   8   39.55    0.91
  -7   9   8  352.97    2.53
  -7   9  12    4.75    1.09
  -7  10  10  321.18    2.54
  -5  12   4   13.11    1.46
  -5  13  13    0.03    1.06
  -5  14   8    6.30    1.31
  -4  13   3  143.88    2.04
  -3  15   4    8.01    1.43
  -3  16   7   81.19    1.64
  -3  16   8   -0.32    1.20
  -2  16   4   55.15    1.54
  -7   6   9  188.73    1.60
  -7   7  12   15.47    1.05
  -7   9  11    3.90    1.26
  -6  10   5   99.13    1.56
  -6  11  13    5.30    1.28
  -5  14   9   35.13    1.45
  -4  15   8    1.81    1.38
  -4  15  10   -0.22    1.16
  -3  11   0  134.71    1.49
  -1  15   1   40.46    1.47
  -7   6  10  118.40    1.33
  -7   7  11   93.33    1.45
  -6  11   6   46.01    1.45
  -1  13  -1   37.74    1.28
  -7   7   9   37.43    1.03
  -7   7  10  221.17    1.84
  -7   8   9   93.33    1.45
  -7   8  10   77.47    1.50
  -7   8  11   53.93    1.29
  -6   9   5  194.48    1.76
  -6  12  10    3.19    1.28
  -5  13  12   19.38    1.30
  -4  14   5    9.67    1.34
  -2  11  -1  209.47    1.65
  -2  16   5   63.61    1.58
  -1  14   0    3.40    1.17
  -6   7   5  182.71    1.45
  -6  11  12  115.79    1.93
  -4  11   2  128.75    1.68
  -3  10   0   11.72    0.87
  -6  10  13   14.59    1.20
  -5  11   4  727.21    3.36
  -5  11  14  141.42    1.84
  -5  12  13    3.14    1.20
  -5  13   7   11.85    1.40
  -4  14   6  140.78    2.20
  -3  13   2    5.84    1.10
   0  16   2    6.08    1.23
   1  17   3    9.29    1.07
  -6  11  11   51.77    1.50
  -5  13  10   73.82    1.86
  -2  16   7    7.66    1.32
  -6   9   6  292.52    2.10
  -6   9  13   29.36    1.40
  -6  10   7   31.61    1.46
  -6  11   9    0.13    1.22
  -5  13   9   21.97    1.44
  -4  14   7   35.07    1.72
  -3  15  10   32.00    1.42
  -2  10  -1    2.00    0.73
  -2  14   2    1.65    1.32
  -2  16   8   77.53    1.60
  -1  16   4    8.53    1.26
  -6   6   6    7.77    0.65
  -6   8   6   42.43    1.16
  -6  10  12   91.34    1.63
  -5  12   6    3.15    1.26
  -5  12  12    2.61    1.32
  -4  12  14   12.28    1.16
  -4  14  10   21.94    1.32
  -3  15   7    1.23    1.23
  -3  15   9    1.12    1.31
  -1  15   2   10.06    1.22
  -6   7   6  356.57    1.95
  -6   8  13   12.71    1.08
  -6  10   8  112.64    1.83
  -5  10  14   61.58    1.49
  -4  14   9   45.43    1.53
  -2  15   4   13.81    1.27
  -1  10  -2    0.76    0.59
  -1  12  -1   99.70    1.36
  -6   9   7   32.67    1.15
  -6   9  12   75.62    1.57
  -6  10   9   71.27    1.69
  -5  11  13   -0.10    1.13
  -5  12   7   13.21    1.34
  -4  13  12    5.57    1.28
  -1  14   1    1.01    1.23
  -1  16   5   22.97    1.37
   0  15   1    9.45    1.15
   0  16   3    9.70    1.24
  -6   6  12  113.08    1.45
  -5   9   4  186.84    1.62
  -4   9   2    5.43    0.74
  -3  12   2  145.91    1.72
  -3  14   5  264.83    2.62
  -6   5  11  107.74    1.20
  -6   8  12   18.56    1.08
  -6   9   8   50.75    1.27
  -6   9  11   13.64    1.13
  -4  13   6   94.47    1.81
  -2  11   0    2.84    0.89
  -2  14   3   50.94    1.61
  -1  15   3    4.06    1.31
   0  13  -1   44.77    1.28
   0  14   0   13.41    1.19
   1  16   2   26.05    1.28
  -6   5   9  169.41    1.30
  -6   5  10   24.08    0.84
  -6   9  10  386.10    2.53
  -5   7   4  216.19    1.44
  -5  10   5    1.93    0.98
  -5  11  12  145.45    1.90
  -4  12  13   26.69    1.30
  -4  13  11   65.61    1.59
  -3  13  13    0.45    1.12
  -3  14  11  108.13    1.78
  -1  16   7   44.75    1.41
  -6   6   8  131.22    1.24
  -6   6  11   66.01    1.18
  -6   7   8  154.52    1.51
  -6   7  11   56.97    1.23
  -6   8  11   31.76    1.13
  -5  10  13    0.97    1.12
  -4  13   7  269.73    2.52
  -4  13  10    7.78    1.51
  -3  12  14    2.02    1.06
  -3  14   6    1.10    1.29
  -2  15   6    4.37    1.25
   0  16   4    0.33    1.19
  -6   6   9   18.18    0.76
  -6   7   9   28.60    1.00
  -6   8   9   68.15    1.26
  -6   8  10   82.79    1.35
  -5  11  11    0.95    1.34
  -4  10   3  206.05    1.73
  -4  12   5   26.70    1.34
  -3  14   7   25.04    1.65
  -3  14  10    0.64    1.17
  -2  15   8    1.66    1.39
  -2  15   9   32.72    1.44
   0  15   2    8.53    1.30
  -6   7  10    5.12    0.84
  -5  10   6   68.20    1.37
  -5  11   8  158.87    1.96
  -4  11   4  192.44    1.88
  -4  12  12   17.47    1.40
  -3  14   8   -0.56    1.27
  -2  14   4    9.12    1.47
  -1  14   2   17.86    1.35
  -1  15   4   82.55    1.77
   0  16   5    1.76    1.24
  -5   9  13    1.42    1.08
  -5  10  12  120.79    1.74
  -4  12   6  167.13    2.15
  -3   9   1   19.35    0.72
  -3  13  12   11.45    1.20
  -2  10   0  379.24    2.01
   1  15   1   10.02    1.24
  -5   8   5  149.38    1.37
  -4  11  13    1.35    1.12
  -3  13   5    8.39    1.27
  -1  12   0   35.19    1.03
   0  16   7    1.64    1.18
   2  16   2   98.39    1.60
  -5   7   5    9.88    0.67
  -5   9   6  226.89    1.81
  -5  10   7   91.90    1.51
  -5  10  11   11.41    1.31
  -4  12   7   70.99    1.79
  -2  13  13    2.01    1.01
  -1  15  10    1.56    1.14
   0  14   1    3.77    1.11
  -5   9  12    7.31    1.19
  -4  10   4  105.49    1.39
  -4  12  10   36.27    1.47
  -3  11  14  116.62    1.70
  -3  13  11    1.44    1.16
  -2  12  14   33.71    1.16
  -2  14   5    8.83    1.32
   0  12  -1   53.53    1.11
   0  15   3  101.78    1.71
   1  14   0    2.88    1.09
   1  16   4   30.13    1.35
  -5  10   9   62.77    1.44
  -4  11  12   39.29    1.54
  -4  12   8  124.25    1.89
  -4  12   9   -0.71    1.25
  -2   9   0   60.04    0.93
  -2  11   1  170.66    1.58
  -2  12   2  303.40    2.18
  -1  15   6    5.65    1.25
  -1  15   9   -0.71    1.20
  -5   8   6    5.45    0.75
  -5   8  12   52.30    1.32
  -5   9   7    1.30    0.88
  -5   9  11  129.52    1.76
  -4  10  13   13.35    1.29
  -3  13   7    1.70    1.29
  -3  13  10    3.37    1.26
  -2  14   6   49.54    1.56
  -1  15   7    3.93    1.22
   0  10  -2  264.18    1.57
   1  13  -1   -0.67    0.85
   1  16   5  109.92    1.81
   2  16   3    4.19    1.18
  -5   7   6   77.64    1.01
  -4  11   6  198.49    1.97
  -3  13   8  242.71    2.40
  -3  13   9   21.71    1.41
  -2  14   7   -0.33    1.26
   0  15   4   11.42    1.40
   1  15   2  118.80    1.73
   1  16   6    2.03    1.19
   1  16   7   19.41    1.29
  -5   6  12   16.35    1.00
  -5   7  12  150.31    1.65
  -5   8   7    6.44    0.88
  -5   9  10  285.72    2.17
  -4   9   4  310.07    1.88
  -4  11  11   57.49    1.49
  -1  13   2   62.30    1.38
   0  14   2    5.77    1.23
   0  15  10   -1.81    1.07
  -5   8  11   23.86    1.04
  -4  11   7    3.11    1.14
  -1  12   1   38.61    1.24
  -1  12  14   11.46    0.99
  -1  14  11   62.01    1.49
   2  16   4   26.93    1.30
  -5   5  11   15.14    0.80
  -5   6   7   19.18    0.74
  -5   8  10   83.68    1.40
  -4   9  13   76.54    1.46
  -4  11   8   11.48    1.22
  -4  11   9   20.10    1.28
  -2  10   1    5.85    0.68
  -2  11  14    1.47    1.04
  -2  12  13    1.80    1.08
   0  15   9    3.37    1.20
  -5   8   9   83.71    1.27
  -4  10   6  326.58    2.19
  -3  10   3  701.18    2.79
  -3  12   6   25.30    1.32
  -2  11   2    0.68    0.98
  -2  13   5   93.29    1.69
  -1  14  10    4.45    1.35
   0  15   8   16.21    1.29
   1  14   1   57.11    1.48
   1  15   3   24.37    1.32
   2  16   5    7.40    1.23
   2  16   6   49.68    1.52
  -5   5  10  194.83    1.37
  -5   6   8   83.85    1.05
  -5   7   8  169.36    1.41
  -5   7   9   -0.19    0.77
  -4   9   5    3.35    0.76
  -4  10  11   43.21    1.48
  -3  12  10    6.97    1.27
   0  12   0    3.07    0.89
   4  16   2   17.55    1.18
  -4   8  13   34.37    1.16
  -4  10   7   46.73    1.38
  -3   9  14   77.91    1.47
  -3  12   8   -0.77    1.27
  -3  12   9   62.97    1.59
  -2  13   6    1.22    1.23
  -1  13   3  205.03    2.01
  -1  14   9   32.31    1.41
   0  14   3   21.34    1.26
   2  15   2   48.67    1.45
   3  16   4   -0.39    1.22
  -3  10  13   22.63    1.33
  -3  11   5   42.31    1.24
  -2  13   9   94.04    1.78
  -1  14   7   84.56    1.74
  -1  14   8   19.15    1.37
   1  12  -1  100.91    1.33
   1  13   0   13.78    1.02
   1  15   4   97.21    1.70
   1  15   9    3.58    1.24
  -4   7  13   69.81    1.27
  -4   8   5    7.62    0.67
  -4   9   6  211.71    1.68
  -4  10   8    7.21    1.05
  -4  10   9  220.75    2.02
  -3   9   3   -0.17    0.64
  -2   9   1  197.45    1.36
  -2  10  14  145.14    1.76
  -2  12   4   79.79    1.48
  -1  12   2   35.85    1.23
  -1  12  13   38.09    1.29
   3  15   1    1.14    0.98
   4  16   3   41.69    1.37
  -4   9  11   66.20    1.47
  -3  10   4  143.38    1.47
  -3  11  11    3.33    1.16
   0  14   4   47.80    1.57
   1  14   2    0.05    1.23
   1  15   5    3.07    1.22
   1  15   8    8.22    1.29
  -4   8  12   59.56    1.22
  -4   9   7   53.03    1.23
   0  13   2    5.41    1.03
   2  15   3   37.28    1.38
   4  16   4   99.34    1.71
  -4   9  10  167.82    1.74
  -3  11   7   59.68    1.56
  -3  11  10  524.10    3.06
  -2  12   5   11.01    1.17
   0  10  -1    2.64    0.56
   2  15   9    9.63    1.24
  -4   7  12  449.10    2.41
  -4   8   6   61.45    0.99
  -4   9   8    1.22    0.88
  -3  10   5   29.15    1.15
  -1  13   5   11.55    1.25
  -1  13  10   53.39    1.52
   0  12   1   29.33    1.12
   2  14   1   46.92    1.30
   5  16   3    0.33    1.00
  -4   6  12  431.81    2.23
  -3   9   4    8.65    0.73
  -2   9  14    1.05    1.07
  -2  12   6  208.55    2.08
   0  11  14    4.36    0.98
   0  12  13    0.97    1.09
   1  10  -2  125.19    1.14
   2  15   4   12.42    1.31
   2  15   8    0.99    1.27
  -4   7   6   40.04    0.77
  -4   8   7   37.04    0.91
  -3  10  11   49.67    1.35
  -2  11   4   45.33    1.18
  -2  12   9    4.37    1.25
  -1  13   6   27.15    1.38
  -1  13   9    0.02    1.26
   0  13   3   48.57    1.46
   2  15   5    9.73    1.48
   2  15   7    4.62    1.42
  -4   7  11    7.62    0.89
  -4   8   9   21.25    1.04
  -3   8  13   64.66    1.38
  -3  10   6   17.60    1.01
  -1  10   1    5.82    0.72
  -1  11   2  245.75    1.83
  -1  11  13    3.88    1.05
  -1  13   8   38.29    1.49
   3  15   3    2.36    1.27
   1  11  -1    3.38    0.69
   1  14   4   21.49    1.47
   2  13   0   26.50    1.08
  -4   5  11  258.63    1.57
  -4   6  11  160.51    1.37
  -4   7   7   10.84    0.66
  -4   7  10    2.06    0.82
  -3   8   4  111.58    1.09
  -3   9   5   86.40    1.14
  -3  10   7  256.60    1.98
  -3  10   9   19.36    1.31
  -1  12   4    8.07    1.08
   1  12  13   99.47    1.50
   2  14   2   90.59    1.52
   4  15   2   12.87    1.25
  -4   7   8   18.87    0.73
  -4   7   9  127.63    1.24
   0  12  12   23.56    1.30
   0  13  10   18.70    1.29
   2  12  -1   60.30    1.07
   2  14  10    2.92    1.07
   3  15   4    9.49    1.30
   5  15   1   -1.15    1.06
  -4   5  10   15.16    0.70
  -4   6  10   95.92    1.07
  -3   9  11   65.52    1.31
  -2  10  12   31.23    1.23
  -2  11  10    3.78    1.18
  -1  12  10    8.78    1.47
   1  14   6    2.88    1.26
   1  14   7  105.30    1.82
  -4   6   8  360.73    1.71
  -4   6   9    1.84    0.57
  -3   9   6    5.75    0.77
  -2  11   9   23.82    1.45
   0  10   0   14.88    0.72
   0  10  14    1.42    0.90
   0  11   1  122.31    1.37
   4  15   3   72.43    1.60
  -3   9  10    3.14    0.97
  -2  11   7   24.51    1.20
  -2  11   8   51.52    1.39
  -1  12   9   85.26    1.68
   0  13   6    2.19    1.43
   0  13   8    3.12    1.27
   2  14   9    9.15    1.27
   3  14  10    3.77    0.99
  -3   8   5  229.30    1.46
  -1   9   1    7.38    0.56
  -1  12   7   41.60    1.39
   0  13   7  135.82    1.93
   1  12   1   87.16    1.34
   1  13   3    5.96    1.21
   2  14   4   45.28    1.55
   4  15   4   -0.08    1.26
   5  15   2   40.09    1.28
  -2   8  13   13.32    1.10
  -2  10   5   24.14    1.08
   0  12   3   13.26    1.03
   1  13  10   24.85    1.28
   2  13  11    3.17    1.03
   2  14   8    2.77    1.20
   4  15   5   11.68    1.33
  -1  11   4    3.30    0.91
   1  11   0   62.36    1.06
   2  14   6   52.47    1.72
   2  14   7    1.55    1.24
   3  13   0    6.91    0.93
   5  15   3    0.31    1.27
  -3   8   6   68.75    0.97
   0   9  14   56.21    1.28
   0  11  12    4.38    1.21
   0  12  10   39.80    1.59
   1  13   9   17.94    1.51
   2  12   0   58.31    1.18
  -3   7  11    2.94    0.84
  -3   8   7  153.89    1.32
  -2   9   4   71.34    0.99
  -2  10   6  379.56    2.19
  -1   9  13    1.95    1.12
  -1  10  12   16.08    1.13
   0  11   2    1.87    0.76
   0  12   4    5.69    1.05
   2  13   2  112.90    1.65
   3  13  11    1.04    0.93
   3  14   3  390.28    2.71
   5  15   5    4.03    1.31
  -3   8   9   99.76    1.24
  -2   9  11  291.49    2.17
  -2  10   7    1.88    0.93
  -1  10   3   72.04    1.06
   1  12   2   50.99    1.25
   1  13   5    2.48    1.18
   1  13   8   40.01    1.48
   2  10  14    1.00    0.84
   3  12  -1   11.94    0.90
   3  14   8    2.21    1.24
   4  14   9    6.21    1.02
   6  15   3    5.32    1.31
  -3   7   6  213.76    1.33
  -1  11   9    1.19    1.12
   0  10   1    1.95    0.60
   0  12   9    1.02    1.21
   1  13   6    2.15    1.21
   1  13   7    1.72    1.25
   3  14   4    8.35    1.21
   6  15   4   10.52    1.43
  -3   6  11  139.45    1.26
  -3   7  10    8.46    0.74
  -2   9   5   40.96    0.89
  -1  11   6  116.07    1.54
  -1  11   7  300.29    2.31
  -1  11   8   10.34    1.15
   3  13   1    1.83    1.03
   3  14   6    1.74    1.43
   4  14   2  103.07    1.61
  -3   5  11   69.87    0.97
  -3   7   7   30.73    0.73
  -3   7   9   15.18    0.78
  -1  10  11   50.10    1.31
   1   9  14   55.28    1.21
   1  11  12  125.39    1.67
   2  13   9   18.63    1.28
   4  14   8    1.99    1.15
   5  14   1   27.61    1.24
  -2   8   4    9.94    0.60
  -2   9   6   49.53    1.07
  -1   8  13    2.37    1.05
  -1   9  12  468.86    2.66
   1  11   1    5.61    0.73
   1  12   3   36.29    1.28
   1  12  10    5.59    1.18
   2  12   1    5.51    0.97
  -3   6  10   86.74    1.00
  -2   8  11    7.11    0.99
   0   9  13    3.37    1.08
   2  13   8   52.76    1.54
   4  14   7    6.50    1.29
   5  14   8    1.48    1.02
  -3   6   9  296.70    1.59
  -2   9   7  233.40    1.68
   0  11  10    1.08    1.12
   1  10   0  241.10    1.44
   1  12   9   38.18    1.60
   2  13   5    5.02    1.41
   2  13   7  119.87    2.01
   4  14   4    4.21    1.19
   4  14   6   82.68    1.69
   5  14   2    0.30    1.20
  -3   5  10  113.42    1.02
  -3   6   8  203.69    1.27
  -1   9   3  219.31    1.40
   0  11   4    7.69    0.91
   3  12   0   18.21    0.99
   3  13   9    4.02    1.11
   6  14   1    1.78    1.10
  -2   6  12    5.20    0.81
  -2   8   5  142.56    1.15
  -1   7  13    0.81    0.93
  -1   9  11   -0.13    1.10
  -1  10   9  126.80    1.61
   2  11   0    3.35    0.64
   2  12  10   13.58    1.37
  -1  10   6   19.50    0.94
  -1  10   8    0.51    0.96
   2  10  -1   29.56    0.74
   3   9  14    2.58    0.82
   3  13   8   19.47    1.52
   5  14   3   30.34    1.38
   5  14   6    8.56    1.39
   6  14   7    7.05    1.00
  -2   8   6   58.71    0.89
  -2   8   9    8.19    0.80
   0  11   7   38.05    1.25
   1   9  13    9.42    1.09
   1  10  12   14.97    1.06
   3  11  -1    4.88    0.74
   5  13   0   75.50    1.34
   5  14   4    4.70    1.23
   6  14   2   41.15    1.40
  -2   8   7   72.49    0.99
  -2   8   8  153.64    1.35
  -1   9   4   12.87    0.68
   0  10   3  142.55    1.35
   3  10  13    9.41    0.88
   5  13   9    1.30    1.06
   7  14   1   50.21    1.35
   3  12  10    1.39    1.03
   3  13   5    0.36    1.18
   3  13   6   35.31    1.42
   6  14   3    1.05    1.25
   1  -1  10  186.98    1.15
   3  -3  12   94.22    1.14
   3   1   8  674.22    2.02
   4  -6  13    5.10    0.83
   5  -8  13   20.16    0.77
   6  -2  11   41.77    1.07
   6   1   8   15.71    0.77
   7   2   6   92.79    1.00
  10  -2   9    4.04    0.98
  10   2   4   13.80    0.76
  11   1   5    2.06    0.81
  13  -3   7   20.38    0.85
  14  -2   5   57.54    0.99
   0  -4  12    6.01    0.63
   2  -3  12   65.93    0.97
   3  -5  13    0.03    0.79
   7  -1  10   24.61    0.99
   8  -7  12   13.89    0.76
  10   1   6    6.55    0.79
  14  -1   4    2.44    0.69
   2  -5  13   57.06    1.02
   4  -5  13   61.66    1.11
   8   3   3  175.98    1.15
   9   1   7   15.44    0.98
   9   3   2  387.47    1.60
  11  -3   9   39.63    0.98
  12   1   4  224.72    1.53
  14  -3   6   -0.16    0.62
   1  -3  12   36.30    0.76
   4   0  10  428.65    2.00
   7  -4  12    1.67    0.88
   7  -2  11   21.10    0.97
   8   2   6   34.25    0.82
   9  -4  11   30.90    0.89
  -1  -3  11    8.92    0.50
   1  -5  13    3.68    0.71
   4   2   7  115.48    1.00
   5  -5  13    4.75    0.76
   5  -1  11   38.37    1.14
   6  -7  13   56.83    0.91
   6  -3  12    5.48    0.85
   6   2   7    7.95    0.64
   7   3   4   19.48    0.64
   0  -2  11   11.72    0.51
   0  -1  10   -0.18    0.46
   3  -2  12   20.47    0.95
   4  -4  13    9.72    0.89
   4   1   9  334.45    1.70
   5   1   9    8.90    0.86
   6  -6  13    6.86    0.74
   6   0  10  265.93    1.85
   8  -5  12   10.67    0.77
   9   3   3  119.76    1.06
  10   2   5   12.37    0.82
  11   0   7  242.48    1.69
  13  -1   6    3.23    0.80
   2  -2  12   10.98    0.80
   2   0  10  407.56    1.70
   6  -1  11   45.14    1.08
   8   3   4    2.08    0.52
   9   2   6   11.53    0.89
  10  -1   9   15.19    1.02
  11   2   4    4.78    0.79
  12  -2   8   39.74    0.94
  13  -2   7    4.03    0.75
   3   1   9   73.31    0.87
   5  -2  12    5.32    0.86
   6  -5  13   77.70    1.10
   6   3   5   69.17    0.86
   7  -3  12   10.47    0.97
   9  -3  11    8.91    0.77
  10   1   7   96.26    1.31
  11  -4  10   14.73    0.73
  11  -2   9    6.38    0.83
  11   1   6   15.24    0.83
  12   1   5    3.26    0.86
  14  -1   5    1.48    0.69
   1  -1  11  121.07    1.02
   8  -4  12   27.17    0.90
   8   2   7   39.11    1.02
   9   0   9    8.76    0.90
   1  -2  12    1.32    0.59
   3  -3  13   30.57    0.98
   7  -6  13   42.56    0.85
   7   1   9    0.01    0.81
  10  -4  11    1.44    0.70
  10  -2  10   75.04    1.11
  10   3   3  337.67    1.65
   2  -3  13  341.02    1.79
   3  -6  14    1.47    0.70
   4  -7  14    1.69    0.65
   4  -3  13    3.06    0.77
   4   2   8  313.55    1.53
  -1  -2  11   20.91    0.57
   0  -4  13    5.33    0.68
   4  -6  14   60.85    1.01
   6   3   6    1.38    0.63
   8  -3  12    3.61    0.86
   8   0  10    0.99    1.03
  11  -3  10   21.34    0.78
  11   2   5   11.54    0.86
   2  -5  14    1.75    0.76
   3   2   8   24.45    0.61
   4  -1  12   29.12    0.95
   4   1  10   36.43    0.88
   5  -7  14    1.16    0.62
   7  -2  12   12.34    0.88
   7   2   8   28.38    0.89
   7   3   6  111.36    1.12
   8   1   9    8.12    0.89
   9  -2  11    3.95    0.76
   9   2   7    6.67    0.79
  12  -1   8   20.04    0.86
  -1  -3  12   10.58    0.52
   0  -2  12   38.15    0.76
   3   1  10  409.54    1.82
   6  -3  13    3.48    0.90
   6   1  10   46.78    1.18
   8  -1  11    3.52    0.85
   9  -4  12    3.17    0.67
   9   3   5    1.85    0.73
  10  -3  11    3.40    0.70
  10   3   4    5.52    0.77
  11   1   7    1.18    0.88
  12   2   4    3.26    0.79
  13  -1   7    2.11    0.66
   1   1   9  202.91    1.12
   3  -2  13   54.28    1.10
   5  -5  14   67.19    1.06
   6  -1  12  109.56    1.45
   8   3   6   66.57    1.04
  10   1   8    9.22    0.84
  12  -2   9    4.30    0.71
  12   1   6    1.02    0.77
   0   0  10  677.70    1.92
   2  -4  14  103.09    1.21
   2  -2  13  234.90    1.59
   2   1  10    7.29    0.61
   2   2   8  193.92    1.17
   3  -4  14    4.18    0.76
   4  -4  14   16.22    0.91
  11  -2  10    3.57    0.74
  13   1   5    1.56    0.76
   1  -1  12   26.55    0.73
   1   0  11  845.48    2.43
   5   3   7   60.08    0.85
   6  -6  14    4.45    0.65
   6   2   9   11.97    0.83
   7   0  11  104.44    1.35
   8  -2  12    3.77    0.75
   9  -3  12    8.34    0.77
  11   2   6   10.86    0.91
   1  -4  14    6.41    0.76
   3   2   9  201.45    1.28
   5  -4  14    0.31    0.80
   7  -1  12   13.97    1.04
   9  -1  11    9.42    0.93
  10   3   5  205.89    1.50
   6  -2  13    3.43    0.79
   8  -4  13    5.24    0.65
   8   4   3   51.46    0.83
   9   3   6  474.27    2.08
  11   3   4   52.86    0.98
  12   2   5   11.57    0.84
  -1  -2  12  225.58    1.24
  -1  -1  11    6.88    0.51
   2  -3  14   43.27    1.00
   3  -3  14   23.94    0.85
   3   1  11   33.29    0.96
   4   1  11   20.29    0.88
   8   1  10   12.02    0.92
   8   3   7  199.77    1.53
  12   0   8    6.16    0.76
   5  -3  14  108.91    1.28
   6   1  11   47.23    1.23
   8   4   4    5.01    0.65
  11   1   8   16.04    0.90
  12  -1   9   28.50    0.80
  12   1   7  105.30    1.19
  13  -1   8    8.43    0.66
  -1  -3  13    7.61    0.66
   0  -2  13    5.35    0.66
   1  -3  14    4.07    0.79
   2  -1  13    1.47    0.73
   2   1  11  205.13    1.44
   4   3   8   45.76    0.81
   5  -1  13   53.32    1.10
   6   0  12   69.94    1.20
   7  -2  13    4.83    0.74
   8  -3  13   26.55    0.81
   9   4   3  329.64    1.60
  10   1   9   29.45    0.95
  13   1   6    3.18    0.74
   4  -6  15    1.01    0.61
   9   3   7   53.04    1.10
  10   3   6   10.85    0.75
  11   3   5   22.50    0.89
   1  -1  13    2.86    0.77
   3  -5  15    1.78    0.69
   4  -2  14    4.79    0.91
   6  -1  13   36.17    0.99
   7   1  11   35.55    1.06
   8   4   5    0.55    0.70
   9   0  11   36.94    1.08
   9   4   4    0.52    0.72
  10  -1  11   43.12    0.94
  10   2   8    1.24    0.79
  12   2   6   28.09    0.94
   3   3   8  161.16    1.15
   4  -5  15    8.59    0.66
   6   4   6   59.86    0.95
   0  -3  14    0.89    0.62
   1   2   9  331.04    1.44
   2   2  10  169.86    1.23
   5   3   9   11.59    0.79
   5   4   6   71.21    0.90
   8  -2  13   -0.83    0.67
   1  -2  14    0.40    0.66
   2  -4  15   13.64    0.73
   3   1  12    5.60    0.80
   4  -4  15   -0.11    0.65
   5  -5  15    0.91    0.56
   5   1  12    6.89    0.90
   7  -1  13    0.94    0.74
   8   4   6  239.16    1.59
   9  -1  12   73.11    1.08
  -2  -2  12    3.74    0.52
  -1  -2  13  123.03    1.04
   0  -1  13   74.86    1.01
   0   0  12  228.58    1.38
   1  -4  15  184.90    1.39
   5   2  11   18.66    1.05
   6  -2  14   16.54    0.83
   7  -3  14   18.25    0.74
   8   0  12  218.87    1.64
   8   2  10   18.05    0.95
  10   3   7  131.15    1.31
  10   4   4   35.52    0.85
  11   3   6   48.53    1.05
   2   1  12   16.14    0.80
   2   3   8  119.06    0.97
   3  -3  15    2.15    0.77
   3   2  11   23.77    0.86
   5  -4  15    6.48    0.65
   6   4   7    1.91    0.70
   7   4   7  121.84    1.28
   9   3   8    2.93    0.78
  11   2   8   12.28    0.91
  13   1   7    0.73    0.65
   0  -2  14   20.49    0.81
   1   2  10   12.30    0.60
   2  -3  15  186.91    1.43
   2  -1  14    2.58    0.84
   4  -3  15   43.97    0.94
  10   2   9    9.37    0.90
  12   2   7    3.74    0.80
   0   1  11  545.42    1.90
   5  -3  15    0.62    0.75
   5  -1  14    4.11    0.79
   7  -2  14    1.58    0.72
   8  -1  13    3.66    0.74
   8   4   7    7.41    0.88
   9   1  11    7.75    0.93
   1  -3  15    1.16    0.70
   1  -1  14   38.62    1.01
   2   3   9   16.39    0.64
   4   3  10   96.80    1.17
   7   2  11   15.82    0.96
  -1   1  10  275.11    1.25
   3  -2  15  113.91    1.31
   3   3  10   11.78    0.86
   7   0  13   16.84    0.86
  11   3   7    4.75    0.88
  -1  -1  13   13.47    0.60
   2  -2  15    3.20    0.74
   3   1  13  119.31    1.34
   4  -2  15    8.00    0.78
   4   2  12   23.62    1.12
   7   4   8    0.31    0.78
   9   4   7   13.19    0.92
  10   4   6   10.12    0.89
   0  -3  15   19.91    0.82
   1   2  11  350.56    1.70
   3   2  12   17.55    0.90
   4   0  14    6.88    0.86
   5  -2  15   18.64    0.84
   8   1  12   15.50    0.87
   8   2  11   -0.81    0.83
  11   1  10    8.27    0.77
  12   3   6    0.64    0.77
   0  -1  14   34.84    0.82
   0   1  12  117.55    1.14
   6   2  12  283.31    1.93
   7   5   3   53.07    0.86
   8   4   8   12.17    0.84
   8   5   4   12.33    0.81
  11   2   9    3.34    0.84
   2  -4  16   89.92    1.07
   3  -4  16   -0.04    0.64
   3   4   8    5.81    0.64
   4   3  11    8.25    0.87
   5   3  11    4.00    0.90
   6   4   9   18.40    0.92
   6   5   4  108.77    1.04
   6   5   5    2.01    0.75
   7   5   5    4.66    0.69
   1   1  13    4.01    0.74
   2  -1  15    2.26    0.87
   4  -4  16    1.44    0.62
   6   3  11  238.38    1.79
   8   5   5   27.73    0.83
   9   5   4  152.14    1.34
   0  -2  15    5.01    0.78
   3  -3  16   22.27    0.84
   7   1  13    1.62    0.78
   9   4   8    5.69    0.82
  10   3   9   54.11    1.15
  10   4   7    7.28    0.82
  11   3   8    6.77    0.79
   1  -1  15    3.80    0.84
   2  -3  16   12.00    0.73
   7   3  11    3.05    0.89
   9   3  10   87.37    1.31
  11   4   6    6.05    0.74
  12   3   7    4.56    0.77
  -2  -1  13   16.93    0.67
  -1  -1  14   34.11    0.78
   2   4   8  271.52    1.43
   7   5   7   31.61    1.03
   5   1  14    4.04    0.84
   5   2  13    9.85    0.95
   6  -1  15    0.49    0.74
   6   4  10    7.53    0.91
  -1   2  10  301.49    1.36
   0   3   9 1063.06    2.47
   2  -2  16   27.19    0.89
   2   4   9  270.99    1.54
   3   0  15   15.31    0.87
   4   3  12   19.46    0.99
   8   1  13    6.07    0.79
   8   5   7   32.11    1.03
   9   5   6   81.06    1.13
  10   4   8    5.00    0.91
   0  -1  15   15.31    0.78
   9   4   9    9.51    0.96
  10   2  11    9.26    0.80
  11   4   7    2.09    0.82
   1  -2  16    4.76    0.72
   2   3  12   64.93    1.22
   5   0  15   18.12    0.88
  -2   1  11   77.12    0.80
   1   0  15    2.90    0.78
   9   2  12   -0.22    0.79
   9   5   7    1.46    0.85
   3  -1  16   74.70    1.11
   4  -1  16    0.29    0.76
   6   4  11   50.68    1.15
   0  -2  16   22.50    0.85
   0   1  14   22.39    0.93
   1   4   9  990.15    2.62
   4   2  14    4.20    0.89
   4   1  15   10.16    0.84
   5   3  13    7.65    0.94
   8   2  13   -0.31    0.79
  10   4   9   12.26    0.84
  11   4   8    3.05    0.82
   2  -3  17   50.39    0.88
   9   4  10   10.85    0.89
   9   5   8    9.35    0.86
   2   3  13  338.51    2.01
   3   5   9  138.62    1.35
   2   0  16    0.79    0.90
   2   5   7   11.76    0.56
   4   0  16  125.71    1.30
   4   5  10   43.89    1.08
   6   6   4  105.34    1.08
   7   6   6   66.78    1.12
   8   6   4   77.93    1.12
   8   6   5   13.65    0.86
  -2   0  14    2.13    0.67
   2  -2  17   53.32    0.91
   2   5   8  356.13    1.69
   5   6   5  172.36    1.32
   7   3  13   -0.41    0.90
   7   5  10   51.12    1.12
   8   6   6   12.12    0.97
  -1   0  15   31.10    0.83
   7   2  14    0.87    0.75
   7   6   7   18.50    0.92
   9   5   9    1.39    0.90
   9   6   5  181.73    1.55
  10   4  10   60.70    1.10
  10   5   8    2.68    0.87
  11   4   9   67.22    1.05
  -2  -1  15   77.03    1.03
  -1   2  13  114.17    1.15
   0   4   9  188.54    1.17
   4   3  14    6.53    0.92
   5   6   4    6.02    0.55
   8   6   7    5.64    0.93
  -1  -1  16   10.54    0.80
   3  -1  17   21.42    0.79
   4   5  11  111.24    1.41
   4   6   6  244.16    1.49
   5   2  15   17.13    0.95
   5   5  11    0.69    0.92
   7   6   8   13.53    1.07
   8   5  10    8.40    0.85
   9   6   6    1.30    0.78
  -3   1  11    1.75    0.43
   0   0  16    0.97    0.75
   2   1  16   55.88    1.14
   4   6   5   68.15    0.83
  -2   2  12    3.98    0.62
   9   6   7   11.29    0.98
  -1   1  15    2.33    0.85
   1   1  16    1.33    0.88
   1   3  14    2.12    0.89
   1   5   7  103.21    0.88
   1   5   9   44.84    0.84
   5   1  16   49.54    0.92
   9   5  10   58.31    1.17
  10   5   9   13.05    0.92
  -2   1  14   25.41    0.75
  -1   2  14  121.02    1.24
  11   5   8   14.54    0.85
   3   0  17  144.53    1.28
   7   3  14   18.66    0.84
   7   4  13   56.06    1.15
  10   4  11    2.13    0.69
  -2   2  13   89.42    1.02
   1   0  17    2.44    0.77
   4   3  15   37.04    1.02
   8   6   9   13.83    0.90
  10   6   7   81.15    1.21
  -1   4   9  123.49    0.95
   2   3  15  186.12    1.65
   2   5  12   59.22    1.35
   3   4  14    3.95    0.94
   4   2  16   13.87    0.88
   5   3  15   -0.53    0.86
   7   6  10    7.72    1.04
  -2   3  11  225.64    1.29
   5   4  14    0.30    0.83
  10   5  10    7.78    0.82
  -2   1  15   75.74    1.12
   0   5   9   70.32    0.95
   2   6   7   11.06    0.62
   2   6   8    3.35    0.69
   5   2  16    0.89    0.70
   5   6  11    4.22    1.15
   9   5  11    1.62    0.82
   9   6   9   18.28    0.97
  11   5   9    2.51    0.68
  -3   2  11  320.74    1.37
  -2   0  16   36.79    0.95
  -2   2  14    5.99    0.81
  -1   1  16   11.37    0.92
  -1   2  15   10.22    0.84
   0   5  10    9.21    0.82
   2   1  17   26.46    0.89
   3   1  17   21.39    0.81
   3   5  13    0.62    0.97
   4   6  11    2.08    0.98
   6   3  15   32.26    0.87
   6   7   7   15.76    1.05
   8   6  10    2.96    0.89
   8   7   6   16.50    1.06
  10   6   8   35.73    1.01
  -1   3  14    9.67    0.96
   1   1  17   13.00    0.92
   1   4  14    5.76    0.94
   7   7   4   22.08    0.80
   8   5  12    9.88    0.83
  -3   1  14    7.56    0.64
   1  -1  18   16.86    0.72
   6   7   4   18.40    0.74
   7   4  14    6.87    0.81
   7   6  11   66.96    1.18
   8   7   7   16.90    1.08
  -1   0  17    2.64    0.71
   4   4  15    1.23    0.95
   4   7   7  352.72    2.04
  -3   2  13  102.57    1.06
   0   1  17   25.08    0.90
   1   5  13    3.93    0.97
   1   6   9    3.86    0.72
   2   4  15    4.46    0.94
   4   3  16    8.56    0.82
   4   7   6    0.48    0.69
   5   6  12    3.89    0.96
   6   7   9  142.03    1.58
   8   7   8   12.17    1.06
  -2   2  15    1.71    0.85
   0   5  12  257.52    1.80
   1   6  10    1.23    0.83
   3   5  14   39.33    1.15
   4   7   5  161.78    1.21
   9   7   7   54.81    1.19
  -4   1  12   66.03    0.77
  -2   4   9   68.58    0.79
  -1   3  15   13.69    0.99
  -3   1  15   19.29    0.77
  -2   3  14    6.81    0.89
  -1   1  17   34.53    0.99
  -1   5  10  209.48    1.37
   2   6  12  150.24    1.65
   6   4  15    2.03    0.72
   7   6  12    2.02    0.87
   8   7   9   61.62    1.26
  -4   1  13  130.75    1.05
  -3   2  14   35.03    0.81
  -3   3  11   31.58    0.64
  -1   5   8  225.57    1.21
   0   0  18   41.92    0.91
   0   3  16   12.98    0.91
   3   7   6  257.82    1.49
   4   6  13    5.32    0.98
   6   5  14    8.58    0.85
   0   2  17   20.86    0.91
   3   7  10  154.59    1.71
   4   7   4  326.88    1.43
   9   6  11   35.04    0.90
  10   6  10    2.46    0.68
   0   6  10  173.12    1.51
   1   1  18   44.33    0.95
   1   6  12    2.71    1.01
   3   4  16    1.39    0.86
   3   7   5    8.07    0.61
   4   7  11    4.62    1.05
   8   6  12   44.48    1.05
  -3   3  13   29.31    0.87
  -2   2  16   26.05    0.91
  -2   4  13   32.20    0.93
   0   6   8    4.64    0.57
   2   4  16   54.72    1.14
   2   7  10    4.25    1.17
   3   5  15    1.96    0.87
   3   7  11    1.88    1.06
   4   4  16    2.59    0.78
  -4   2  11    7.09    0.48
  -3   1  16   23.43    0.91
  -3   2  15   36.44    0.99
  -2   3  15   32.77    0.97
  -1   2  17   24.90    1.01
  -1   3  16    2.63    0.85
   0   1  18    2.19    0.76
   2   5  15  113.75    1.45
  -4   2  12  278.21    1.36
   4   7  12   -0.18    1.18
   6   8   7   24.47    1.18
   7   8   6    7.62    1.15
   7   8   7   26.76    1.26
   1   5  15   36.32    1.14
   3   6  14    1.87    0.95
   3   7  12   28.89    1.20
   5   8   8    1.11    1.11
  -3   3  14   93.91    1.13
  -2   5  10   53.44    0.90
  -1   1  18   68.61    1.07
   0   3  17   10.30    0.90
   0   4  16  145.11    1.53
   1   7   8   11.18    0.78
   4   8   7  187.41    1.79
   8   7  11   36.68    1.03
   8   8   7   33.03    1.17
  -3   4  10   19.15    0.64
  -3   4  11   94.60    0.96
  -2   5   9  108.21    0.95
  -2   5  11  137.29    1.23
   2   7  12   19.33    1.18
   5   8   5  281.86    1.69
   6   6  14   10.71    0.87
   7   8   9   25.43    1.20
  -3   2  16    1.96    0.88
  -3   4  12  144.66    1.21
  -2   3  16    0.87    0.81
  -1   6   9   55.31    0.94
   0   2  18    2.80    0.74
   0   6  13   87.02    1.43
   1   7  11    2.51    1.04
   3   5  16    9.26    0.93
   5   8  10    2.76    1.18
   6   8   4    6.63    0.76
   7   7  12   60.63    1.20
  -3   3  15   11.31    0.90
  -2   4  15    1.57    0.98
  -1   4  16    1.81    1.03
   3   4  17    5.64    0.75
   3   8   8    5.12    1.00
   4   5  16   58.15    1.04
  -1   6   8  176.28    1.18
   4   6  15    0.71    0.90
   8   8   9    3.72    0.97
  -4   3  12    4.54    0.55
  -1   2  18   39.25    1.01
   1   3  18   34.74    0.94
   2   6  15   28.44    1.08
  -4   2  15   36.26    0.94
  -4   3  13   46.32    0.90
  -3   4  14    3.66    0.91
   0   4  17    7.17    0.91
   5   6  15    0.75    0.75
   6   8  11   35.64    1.15
  -1   6   7   19.14    0.57
   2   8  10  126.10    1.69
   8   8  10    4.31    0.91
  -4   3  14   33.45    0.91
  -3   2  17   62.14    1.14
  -3   3  16   24.33    1.02
  -2   3  17   87.03    1.26
  -2   4  16   11.63    1.06
   0   7  12   77.79    1.43
   4   8   4  163.18    1.18
   7   8  11    0.67    0.95
  -2   2  18   47.16    1.04
  -1   4  17   46.10    1.19
   0   6  15    4.12    1.20
   0   7   7 1187.71    2.90
   3   8   5   47.05    0.80
  -2   5  15   21.81    1.17
  -2   6  10   47.30    0.90
  -2   6  12    5.63    1.03
  -1   5  16   32.79    1.24
   3   6  16   20.12    0.97
   6   8  12   22.65    1.03
  -5   2  12   15.32    0.60
  -3   5  13   84.80    1.28
  -2   6   9    1.60    0.59
   1   8   9    3.76    0.93
   1   8  10   24.17    1.16
   2   6  16   34.73    1.06
   2   8  12   19.04    1.25
   8   8  11   29.58    0.96
  -4   4  11   12.85    0.60
  -4   4  12   99.50    1.05
  -3   5   9  183.49    1.16
  -1   7   9   21.63    0.92
   3   8  13   51.67    1.43
   4   8  13    9.65    0.96
   5   9   6   48.02    1.23
   5   9   9    4.93    1.18
   7   8  12    7.91    0.87
  -5   2  14   64.37    0.98
  -4   4  10   86.89    0.86
  -4   4  13    5.31    0.71
  -3   3  17    2.65    0.94
   0   4  18   35.03    1.00
   0   7   6  194.37    1.19
   2   7  15   60.09    1.22
   5   9  10   65.80    1.56
   6   9   5  203.37    1.68
  -2   3  18    7.28    0.90
   0   6  16    2.36    0.92
   2   8  13    0.67    1.07
   4   9  10    2.80    1.16
  -1   7  13    1.63    1.07
   1   7  15   19.30    1.07
   2   8   5  140.57    1.10
  -4   3  16    8.50    0.85
  -1   5  17   10.69    0.96
   0   8   9   33.12    1.04
   0   8  11   16.53    1.16
   1   8  13   18.21    1.23
   4   9  11   37.27    1.30
   8   9   9   -1.80    0.92
  -5   3  12   27.32    0.66
  -4   4  15   47.94    1.11
  -1   7   7   -0.12    0.63
   0   8  12   52.45    1.41
   2   8  14   23.23    1.27
   3   8  14   13.74    1.02
  -3   6  11  142.22    1.33
   1   6  17    3.23    0.83
   3   9   6   10.85    0.91
  -5   3  14   97.79    1.12
  -4   5  11  256.77    1.56
  -4   5  12  162.43    1.35
  -3   6  10   84.64    1.03
  -2   7  10   34.33    0.95
  -2   7  12    0.00    0.95
   0   8  13    2.64    1.17
   3   9  12    2.77    1.10
   5   9   4  277.59    1.63
   8   9  10    3.98    0.84
  -4   3  17   80.08    1.24
  -4   5  13    9.56    0.81
  -2   4  18   19.20    0.92
  -2   5  17   87.79    1.35
  -2   7   9  118.30    1.19
  -2   7  13   18.80    1.11
   0   8   7   38.37    0.86
   1   7  16    5.62    0.97
  -5   3  15   19.65    0.92
  -4   4  16   11.76    1.02
  -4   5  10   15.38    0.62
  -3   6   9  288.78    1.53
  -1   7  15    5.85    1.07
  -1   8  10  599.94    2.69
   1   9  10  137.08    1.75
   2   9  12    3.21    1.19
   3   8  15    1.49    0.93
   6   9  12   12.14    0.88
  -2   3  19    5.84    0.74
  -1   7   6  238.23    1.30
  -1   8  12   23.87    1.23
   0   7  16    1.57    0.90
   1   8   5  387.43    1.67
   2   8  15    4.35    0.97
   3   9   5   42.07    0.87
   4   9   4   33.09    0.83
  -5   4  13    4.35    0.76
  -1   6  17   42.70    1.16
   1   8  15    5.53    1.11
  -3   6   8  208.16    1.27
   4  10   9    0.61    1.50
   5  10   7  314.03    2.47
  -3   4  18    1.25    0.90
  -3   5  17    9.75    1.05
  -1   7  16   70.16    1.31
  -5   4  10   10.78    0.59
  -4   4  17   15.51    0.94
  -4   6  12  432.45    2.23
  -3   7  11    3.48    0.85
  -2   5  18    0.09    0.80
   0   8  15    5.21    1.02
   1   7  17    0.46    0.80
   3   9  14    5.02    1.01
   5  10   6    2.29    0.96
  -4   5  16    0.06    0.99
  -4   6  13   37.98    1.07
  -3   7  10    8.00    0.79
  -3   7  13   28.91    1.14
  -2   6  17   23.96    1.09
  -2   8  12  805.48    3.39
   2   8  16    1.75    0.88
   2   9   5  251.56    1.53
   2   9  14   20.94    1.13
  -4   6  14    7.80    0.95
   1   8   4   81.23    0.85
   3  10   7    5.05    1.00
   4  10   6   15.50    0.94
   7  10  10    2.45    0.91
  -5   5  12   55.68    1.04
  -5   5  13  155.63    1.48
  -3   7   9   15.33    0.75
  -2   8  13   15.91    1.19
   4  10  12    3.13    1.10
   6  10  11    1.35    0.85
  -2   8   9    7.56    0.84
  -2   8  14   10.96    1.36
  -1   9  11    1.90    1.34
  -6   3  12    2.85    0.54
  -6   3  14   34.41    0.87
  -5   5  11   12.84    0.67
  -4   4  18  160.00    1.54
  -4   5  17   86.09    1.38
  -4   6   9    1.84    0.69
  -3   5  18    8.54    0.90
  -3   6  17    5.87    1.06
   0   9  14   61.12    1.44
   2   9  15   20.33    1.08
   4  10   5   14.25    0.97
  -2   6  18    3.87    0.89
  -2   8   8  158.54    1.37
  -1   9  13    1.25    1.42
  -5   5  10  184.11    1.25
  -4   6  16   71.37    1.43
  -1   8  16   85.58    1.44
   1   9   5   18.99    0.78
   2   9   4   23.30    0.68
   2  10  13    5.36    1.22
   4  10  13    6.63    0.93
  -5   4  17  105.76    1.32
  -3   8  11    8.75    1.05
   0   9  15    4.99    1.16
   3   9   3    1.22    0.62
  -6   4  13   52.39    0.92
  -4   7  11    6.63    0.87
  -4   7  14    1.66    1.01
  -3   8  13   67.88    1.43
   0  10  11    3.21    1.48
   3  10   5  285.59    1.77
  -6   4  12  164.79    1.26
  -5   6  12   17.74    0.89
  -5   6  13   24.37    0.98
  -4   6   8  365.03    1.64
  -4   7  10    2.29    0.77
  -3   8  14  118.02    1.68
  -2   8   7   73.08    1.00
  -2   9  11  303.53    2.26
  -2   9  12    4.41    1.18
   0  10  12  230.62    2.30
  -6   4  11   85.78    0.96
  -5   5   9    8.31    0.54
  -5   6  11   30.97    0.97
  -4   5  18    6.98    0.87
  -4   6  17    0.92    1.03
  -3   6  18   35.47    1.03
  -3   7   7   30.58    0.71
  -1   9  15    0.93    1.22
   1   9  16   42.72    1.07
   2  10  14    0.74    0.99
   3  11   9   -1.63    1.62
   4  11  10    8.61    1.28
  -3   7  17    3.11    1.06
   3  11  11   15.50    1.50
   4  11   7   82.03    1.57
  -5   5  17   16.66    1.07
  -4   7   9  128.80    1.25
  -2   7  18    6.34    0.90
  -2   9   9   15.26    1.04
  -2   9  14    0.54    1.16
  -1   8   5   44.08    0.76
   0   9  16    7.38    0.97
   2  11  10    6.39    1.64
   5  11  11    9.65    1.08
   6  11  10    4.06    0.88
  -6   5  14    5.27    0.93
  -5   6  10   37.26    0.86
   2   9   3   30.95    0.73
   2  11  11   21.39    1.47
   3  11   7    5.52    1.05
   3  11  12   55.94    1.48
  -6   4  10   15.44    0.57
  -4   6   7  492.25    1.82
  -4   8  12   64.33    1.47
  -3   8   8   18.96    0.84
  -2   9  15    7.03    1.31
  -1   9  16    1.16    1.05
  -1  10  13  140.24    2.08
   2  11   8    4.85    1.18
  -5   7  13   37.60    1.28
  -4   6  18    1.09    0.96
  -4   8  13   38.64    1.28
  -2   8   6   63.36    0.91
  -1   9   6   16.10    0.90
  -6   5  11  117.03    1.15
  -5   7  12  146.43    1.54
  -4   5  19    1.99    0.76
  -4   7   8   17.79    0.73
  -3   7   6  214.66    1.31
  -3   7  18   16.68    1.02
  -3   9  11   64.62    1.41
  -1  10  14    2.38    1.35
   1  11   9    5.31    1.26
   2  11   7    2.38    1.03
   3   9   2   38.24    0.74
   3  11  13   43.68    1.26
  -5   5  18   90.35    1.28
  -5   6  17   73.09    1.38
  -4   8  10    9.49    0.94
  -3   9  10    3.03    1.03
  -3   9  14   86.80    1.60
  -1  10   8    0.62    0.99
   0  10  15    1.57    0.97
   1  11   8   46.36    1.52
  -2  10  11   41.26    1.41
  -2  10  12   34.51    1.42
   1  11  13    1.93    1.17
  -6   5  10   23.33    0.70
  -6   6  13  159.97    1.54
  -6   6  14    9.30    0.93
  -3   8   7  152.41    1.30
  -3   9  15   94.37    1.58
  -2   9   7  236.67    1.68
  -2  10  10  488.25    2.80
  -1  10  15    1.65    1.14
   0  10   6  455.69    2.28
   0  11  10    1.31    1.28
  -6   6  12  111.36    1.30
  -5   7  16   92.28    1.55
  -4   8   9   21.21    0.93
   0   9   4    6.69    0.67
   1  11   7   12.61    1.05
   3  10   3    7.30    0.75
  -7   4  13   62.40    1.04
  -7   4  14    2.85    0.77
  -6   6  11   63.56    1.11
  -4   7   7   11.67    0.74
  -2   8   5  139.59    1.12
  -1  10   7   12.36    0.97
  -7   4  12   73.30    1.04
  -4   7  18   34.54    1.02
  -4   9  13   77.74    1.53
  -2   9  17    7.02    0.98
   3  12   9   14.15    1.69
   3  12  10    2.49    1.53
   4  12  10    3.35    1.16
   5  12   8    0.59    1.22
  -6   5   9  166.80    1.23
  -5   7   9   -0.16    0.70
  -5   7  17   18.58    1.17
  -5   8  14    4.79    1.07
  -4   9  11   66.87    1.41
  -4   9  14    1.05    1.14
  -2  10  15    3.68    1.15
  -1  11  10  180.92    2.07
   0  11  14    5.30    1.13
   4  12  11    3.98    1.03
  -5   8  11   24.32    1.09
  -4   8   8  133.47    1.34
  -3  10  11   47.65    1.43
  -3  10  12   25.10    1.36
  -3  10  13   22.56    1.34
  -2   9   6   49.32    0.97
  -1  11  13    4.02    1.24
   2  12   9   43.78    1.61
   2  12  11   16.85    1.48
   4  12   7   31.38    1.31
  -7   4  11  122.72    1.15
  -7   5  13   13.92    0.92
  -7   5  14    9.65    0.88
  -6   7  14   73.45    1.35
  -4   9  10  167.11    1.74
  -3   8   6   67.01    0.95
   0  11   7   39.68    1.23
   3  12  12    1.26    0.97
  -7   5  12  562.12    2.35
  -7   5  15   81.79    1.24
  -6   7  12  107.39    1.40
  -5   8  10   81.82    1.30
  -3  10  10    1.27    1.14
  -2  10  16    5.70    1.05
  -1  11  14   62.27    1.54
   1  12  11    3.40    1.42
  -6   7  11   57.58    1.27
  -5   7   8  168.98    1.37
  -5   8  16    9.31    1.12
  -3   9   7    0.06    0.80
  -3  10  15    2.80    1.26
  -1  11   8    7.51    1.14
   2  12   7   -0.18    1.21
  -5   7  18    7.58    0.98
  -4   7   6   39.24    0.77
  -4   8  18    3.70    0.94
  -4   9   9    7.96    1.00
  -3  10   9   18.66    1.18
  -2  10   7    2.62    0.93
  -2  11  10    3.56    1.26
  -2  11  13   22.73    1.37
  -7   4  10   74.58    0.93
  -7   5  11    4.22    0.74
  -7   6  14  199.93    1.78
  -6   5   8   34.35    0.74
  -6   6   9   17.46    0.72
  -5   9  13    0.88    1.34
  -4   8   7   36.94    0.90
  -1  11  15    1.08    0.96
   0   9   3    7.92    0.60
   0  12  12   24.81    1.62
  -6   6  18    1.03    0.92
  -6   7  10    9.39    0.86
  -5   8   9   82.37    1.25
  -5   8  17    5.68    1.00
  -5   9  12    5.50    1.15
  -4  10  12   10.00    1.26
  -4  10  13   13.40    1.27
  -3  10  16    1.27    1.08
  -2   9   5   38.82    0.88
  -2  11   9   23.11    1.30
   0  12   9    2.15    1.27
  -7   6  12   37.02    1.10
  -6   8  13   12.33    1.10
  -6   8  14   67.99    1.39
  -5   9  11  124.55    1.66
  -4   9   8    0.85    0.90
  -4   9  17    4.94    1.05
  -4  10  11   42.36    1.41
   0  12  13    0.67    1.21
  -7   6  16    4.21    1.05
  -6   8  15   62.34    1.49
  -3   8   5  231.73    1.45
  -3  11  12    1.49    1.49
   0  12   8   30.94    1.34
   1  10   3    5.66    0.65
  -7   5  10   72.14    0.95
  -7   6  11   24.04    0.98
  -5   7   7  151.18    1.26
  -5   9  10  287.62    2.24
  -4  10  10    4.11    1.17
  -4  10  15   96.27    1.59
  -3   9   6    6.54    0.78
  -3  11  11    3.36    1.29
  -2  10   6  389.59    2.19
  -2  11   8   49.85    1.37
  -1  12  10    8.14    1.36
   0  12  14   21.77    1.10
  -6   6   8  128.98    1.15
  -6   8  16   31.25    1.32
  -5   8  18    6.00    0.94
  -5   9  16   12.72    1.13
  -3  11  10  545.53    3.11
  -3  11  14  127.70    1.81
   3  13  10    3.27    1.36
   4  13   9   52.06    1.55
  -7   4   9    5.54    0.51
  -7   7  13   32.73    1.12
  -7   7  14  193.69    1.80
  -7   7  15   45.11    1.32
  -6   7  18   17.88    0.99
  -4   8   6   59.77    0.96
  -4  10   9  222.85    2.13
  -3  10   7  258.12    2.04
   1  12   6   16.40    1.09
   2  13  10    0.51    1.59
   3  13   8   19.76    1.50
  -7   7  12   15.01    1.12
  -4   9   7   52.69    1.10
  -3  11   9    5.01    1.43
  -3  11  15    4.16    1.15
  -7   6  10  117.83    1.25
  -7   7  16   16.76    1.18
  -6   8  17    5.00    1.06
  -5   9  17    1.70    0.96
  -5  10  12  133.95    1.98
  -5  10  13    1.77    1.19
  -5  10  14   64.15    1.66
  -2  11   7   24.75    1.19
  -2  12  11    1.20    1.29
  -2  12  13    1.21    1.25
   1  13  11    1.69    1.41
   2  11   3    4.81    0.89
  -8   5  13   75.99    1.22
  -7   5   9   82.43    0.96
  -7   7  11   90.38    1.41
  -6   9  14   53.25    1.39
  -4  11  12   42.63    1.68
  -2   9   4   68.57    0.99
  -2  12  10  316.32    2.61
  -1   9   3  217.59    1.41
   1  13   9   18.00    1.51
  -6   9  15   27.10    1.20
  -5   8   7    8.96    0.92
  -5  10  11   10.25    1.24
  -4  10   8    5.86    1.07
  -4  11  11   57.79    1.57
  -4  11  14   18.92    1.26
  -3   9   5   85.30    1.21
  -2  10   5   20.77    0.93
  -2  12   9    6.05    1.51
   0   9   2   18.38    0.70
   0  10   3  151.43    1.31
   0  13  10   20.15    1.65
   2  13   7  119.26    1.88
  -8   5  12   18.01    0.94
  -7   7  17    8.71    0.96
  -7   8  13   65.71    1.49
  -7   8  14   14.72    1.26
  -6   8   9   68.93    1.23
  -6   9  11   14.13    1.17
  -5   7   6   79.97    0.98
  -3   8   4  112.40    1.08
  -8   6  14   71.93    1.35
  -8   6  15    8.45    1.05
  -7   8  15   13.32    1.16
  -6   9  16    6.36    1.13
  -5   9   8   30.67    1.10
  -5  10  10    1.57    1.17
  -5  10  16    0.84    1.05
  -4  11  10    5.24    1.27
  -4  11  15   21.38    1.27
  -3  10   6   18.04    1.00
   0  11   4    6.76    0.86
   1  10   2    0.51    0.67
   3  13   6   29.74    1.35
  -8   6  13    4.01    0.90
  -7   7  10  216.76    1.71
  -4   9   6  215.11    1.66
   1  11   3    6.85    0.85
   1  13   7    0.94    1.30
  -8   5  11   34.31    0.94
  -8   6  12   18.72    1.00
  -6   9  10  379.48    2.44
  -4   8   5    9.40    0.68
  -3  12  10    7.40    1.33
  -1  13  12    2.28    1.38
  -7   5   8  131.06    1.14
  -7   8  11   54.35    1.28
  -6   9  17    4.57    0.93
  -4  10   7   46.60    1.23
  -4  11   9   20.81    1.32
  -4  11  16    5.93    0.96
  -3  11   7   55.65    1.37
  -1  13  13    4.18    1.16
  -8   4  10    2.57    0.64
  -8   7  14   22.71    1.25
  -6   7   7   83.00    1.15
  -6   8   8   68.22    1.18
  -6  10  12   97.92    1.69
  -5  11  12  146.05    1.96
  -5  11  14  147.48    1.90
  -3  12   9   63.64    1.79
  -3  12  15    4.39    1.03
  -1  13   9    0.97    1.27
  -8   6  11   10.62    0.95
  -7   7   9   34.76    0.97
  -7   9  13   17.82    1.37
  -7   9  14    6.02    1.24
  -6   9   9   37.46    1.21
  -5   8   6    4.10    0.73
  -5   9   7    1.22    0.89
  -5  11  11   -0.06    1.25
  -2  13  12   -0.46    1.38
  -1  10   3   73.27    1.11
   0  13   7  135.02    1.83
   1  12   4  157.49    1.60
   1  13   6    2.73    1.20
   2  10   1    5.16    0.67
  -8   5  10   18.77    0.81
  -7   8  10   76.17    1.34
  -7   9  12    4.08    1.27
  -3   9   4    7.22    0.84
  -3  10   5   29.41    1.01
  -2  13  10    1.34    1.53
  -2  13  13    2.08    1.21
   2  13   5    6.46    1.14
   2  14  10    1.80    1.34
  -8   7  12    3.63    0.92
  -7   6   8   39.74    0.83
  -6  10  16   37.82    1.26
  -3  12   8    1.85    1.43
  -1   9   2  195.25    1.34
   0  10   2  266.75    1.65
  -5   7   5   10.72    0.65
  -4   9   5    1.95    0.77
  -4  10   6  329.03    2.15
   2  12   3    2.88    0.85
  -8   6  10  304.64    1.92
  -8   8  14   56.95    1.46
  -8   8  15    1.84    1.18
  -4  12  15   16.69    1.11
   0  13   6    3.18    1.10
   0  14  11    6.42    1.45
  -8   8  13    1.59    1.03
  -7   9  17    0.33    0.96
  -6   8   7    3.31    0.82
  -6   9   8   49.41    1.24
  -4  11   7    3.04    1.33
  -3  13  11    3.32    1.26
  -3  13  12   11.07    1.35
  -3  13  13    1.38    1.17
   0  12   4    3.98    0.93
   0  14  10   23.80    1.55
   1  13   5    3.82    1.09
  -8   4   9    0.88    0.54
  -8   8  12   30.85    1.31
  -6  11  12  121.87    1.99
  -6  11  13    6.12    1.20
  -6  11  14   64.06    1.47
  -5   9   6  221.67    1.75
  -3  12   7   13.92    1.46
  -3  13  10    5.74    1.55
   2  14   7    0.30    1.14
  -8   5   9   63.33    0.92
  -7  10  14   25.76    1.25
  -7  10  15  141.41    1.86
  -6   7   6  346.60    1.83
  -6  10   9   71.39    1.51
  -5  10   7   91.12    1.48
  -5  12  12    2.48    1.24
  -5  12  13    2.39    1.17
   2  13   4   36.20    1.28
  -9   6  13   11.27    1.04
  -8   7  10    4.89    0.90
  -8   8  17   -0.66    0.96
  -6  11  11   50.88    1.53
  -3  13   9   23.08    1.64
  -2  11   4   45.43    1.30
   1  14   7  101.39    1.71
  -8   6   9   15.43    0.92
  -8   8  11   14.66    1.07
  -8   9  14    1.46    1.28
  -7   6   7   31.11    0.78
  -7  10  16    1.65    1.13
  -6  11  16   16.36    1.15
  -5  11   8  159.31    1.93
  -5  12  15    8.48    1.08
  -4  12   8  126.68    1.87
  -3  10   4  140.68    1.46
  -1  13   6   30.66    1.31
  -1  14   9   35.95    1.69
   0  13   5   62.58    1.38
   2  14   6   46.61    1.45
  -8   9  13   17.60    1.19
  -8   9  15    6.84    1.11
  -7   9   9    2.01    1.06
  -7  10  11   19.02    1.31
  -6   9   7   34.92    1.13
  -6  11  10    3.64    1.28
  -4  13  12    5.14    1.24
  -4  13  13   34.12    1.40
  -2  12   5   12.29    1.29
  -9   6  12   30.15    1.05
  -9   7  14   92.20    1.44
  -8   9  12    7.65    1.30
  -8   9  16   23.63    1.19
  -6   8   6   39.62    0.99
  -6  10   8  109.91    1.65
  -4   9   4  318.20    1.90
  -4  11   6  205.93    1.97
  -4  13  14   10.03    1.16
  -3   9   3    1.17    0.70
  -3  12   6   24.62    1.45
  -3  13   8  251.89    2.52
  -2  14  12   14.46    1.30
  -1  12   4    7.86    1.02
  -1  14   8   19.27    1.53
  -9   5  11   71.52    1.15
  -9   7  13   20.97    1.11
  -8   7   9   92.85    1.36
  -8   8  10  313.57    2.19
  -7  10  10  340.08    2.63
  -5   7   4  217.93    1.42
  -5  10   6   68.65    1.50
   0  12   3   11.33    1.08
  -5   9   5    2.58    0.83
  -4  12   7   72.71    1.78
  -2  14   9    5.58    1.51
   0  10   1    3.05    0.69
  -9   7  12   13.94    0.99
  -8   9  11   42.35    1.34
  -8   9  17    5.85    0.95
  -7  11  12  123.51    2.00
  -6  12  12   52.97    1.52
  -2  13   6    0.32    1.15
  -1  13   5   11.45    1.17
  -9   8  14    3.27    1.08
  -9   8  15    9.74    1.18
  -8  10  14   38.21    1.46
  -7   9   8  362.25    2.37
  -6   7   5  182.10    1.39
  -6  12  15   49.59    1.42
  -5  13  13    0.19    1.24
  -3  14  12    0.07    1.15
  -1  14   7   84.70    1.69
   0  13   4    3.49    1.14
  -9   5  10   13.60    0.88
  -9   7  11    4.66    1.04
  -9   8  13   20.85    1.15
  -8   8   9    5.43    1.14
  -8  10  13   43.09    1.37
  -8  10  15    7.08    1.12
  -6   9   6  294.23    2.05
  -6  10   7   30.46    1.27
  -5  13  12   21.71    1.34
  -5  13  14   12.23    1.24
  -3  14  10    0.93    1.33
  -2  11   3    5.40    1.05
   1  11   1    4.98    0.82
   1  12   2   50.33    1.12
   1  14   5    6.34    1.24
  -9   8  12  113.80    1.69
  -8   9  10    4.48    1.12
  -8  10  12   87.48    1.63
  -8  10  16   66.71    1.39
  -7   6   6   71.53    0.96
  -6  11   8    2.99    1.24
  -6  12  10    3.69    1.56
  -5  13  11   15.79    1.38
  -4  10   4  111.42    1.53
  -2  12   4   74.76    1.43
  -9   6  10    0.67    0.75
  -8   7   8    3.27    0.81
  -5  13  10   75.22    1.90
  -4  12   6  162.75    2.09
  -2  10   2  207.82    1.59
  -1  11   2  250.40    1.86
  -1  12   3  139.04    1.60
   0  15   9    2.38    1.28
   1  13   3    4.55    1.10
  -9   9  14   22.75    1.34
  -6   8   5  433.96    2.20
  -5  10   5    4.26    1.01
  -5  11   6    4.26    1.16
  -4  14  12    2.47    1.27
  -2  13   5   96.05    1.76
  -2  14   7    0.22    1.40
  -1  14   6   14.51    1.23
  -1  15  10    1.17    1.35
   1  10   0  261.22    1.58
  -9   7  10  182.93    1.77
  -9   8  11   81.59    1.45
  -7  10   8    6.07    1.20
  -4   9   3  378.63    2.05
  -1  13   4  185.67    2.00
  -1  15   9    0.41    1.37
   0  14   5    1.68    1.16
  -9   9  16   18.93    1.10
  -7  12  12    3.40    1.42
  -5  13   9   22.33    1.45
  -1  10   1    3.78    0.67
   0  12   2    6.10    0.90
  -9   5   9    2.29    0.79
  -9   9  12   42.81    1.36
  -8   6   7    5.30    0.80
  -8  11  13    2.44    1.15
  -8  11  15   84.09    1.56
  -7  11   9   96.34    1.77
  -6  10   6   27.51    1.23
  -6  13  13   20.72    1.30
  -4  13   7  272.71    2.48
  -2  15  10   -0.56    1.36
   0  11   1  122.02    1.31
   0  13   3   51.26    1.43
   1  14   4   18.52    1.28
  -6  13  11   84.72    1.86
  -2   9   1  213.36    1.47
 -10   7  13    6.17    1.12
  -9   8  10   78.87    1.43
  -9   9  11   10.98    1.33
  -6   9   5  203.64    1.77
  -4  11   4  194.68    1.90
  -4  12   5   28.00    1.53
  -3  14   7   25.48    1.60
  -2  14   6   50.68    1.49
  -2  15   9   34.91    1.49
  -9   7   9   16.73    1.09
  -9  10  13    4.67    1.33
  -9  10  14    2.32    1.13
  -9  10  15   48.16    1.35
  -7  12  10  143.90    2.19
  -6   7   4    5.03    0.67
  -5  14  11   19.64    1.46
  -5  14  12    3.67    1.21
  -3  13   5   10.44    1.45
  -2  11   2    1.32    0.97
 -10   7  12    0.88    1.10
  -8  10   9   82.70    1.65
  -5   8   3  137.65    1.30
  -4  13   6   94.49    1.95
  -2  13   4    2.85    1.14
  -2  15   8    1.55    1.35
  -1  15   7    1.89    1.23
   0  15   6    2.98    1.26
   1  12   1   86.75    1.35
 -10   8  13    7.73    1.24
  -9  10  12   12.72    1.20
  -9  10  16   -0.72    0.91
  -7   9   6  170.22    1.76
  -1  12   2   35.96    1.13
  -9   8   9  111.30    1.55
  -9   9  10    3.32    1.12
  -8  11  10   16.67    1.36
  -7   7   5   44.77    0.93
  -6   8   4    4.65    0.78
  -6  13   9    6.78    1.36
 -17   5  10   14.68    1.08
 -16   5   8   17.59    1.08
 -14   3   5   66.63    1.32
 -14   4   5    3.73    1.04
 -14   9   7   11.44    1.00
 -13   8   5    3.99    0.96
 -12  -3   6   33.20    0.98
 -12  -2   5  298.13    1.71
 -11  -2   4    2.12    0.65
 -17  -1  14    5.85    0.85
 -17   3  10   10.85    0.98
 -17   4  10   28.06    1.10
 -16   3   8   63.07    1.34
 -16   4   8   37.63    1.21
 -16   7   9   81.45    1.36
 -15   1   7   40.28    1.23
 -14  -3   9  172.60    1.64
 -13   3   4  104.82    1.39
 -13   4   4    4.35    0.99
 -12   3   3    2.78    0.89
 -12   4   3   17.10    0.98
 -11  -3   5   67.98    0.94
  -9   6   1    1.25    0.69
 -16   8  10    8.48    1.00
 -15   8   8   13.85    1.16
 -14   7   6    5.20    1.20
 -13   0   5   20.74    1.03
 -12   0   4  107.86    1.38
 -11   0   3  833.76    2.59
 -16   1   9   10.37    1.10
 -15   2   7   97.86    1.51
 -15   9   9    5.80    0.91
 -14  -2   8   47.19    1.30
 -13   9   6   27.75    1.07
 -10   1   2  201.73    1.39
  -9   2   1  107.59    0.98
 -17   2  11   10.70    1.05
 -16  -1  11    2.36    1.02
 -16   0  10   18.72    1.27
 -16   6   9    0.29    1.14
 -15  -2  10   11.64    1.17
 -14   1   6   11.54    1.10
 -12   9   5  169.56    1.62
 -11   7   3   45.72    1.13
 -11   9   4  111.38    1.39
 -17   1  12   17.75    1.07
 -17   3  11   13.38    1.09
 -17   4  11   60.24    1.34
 -17   5  11   38.14    1.16
 -15   3   7   40.37    1.32
 -15   4   7  142.03    1.70
 -13  -1   6   16.13    1.03
 -10   6   2   24.72    0.96
  -9   4   1  803.76    2.37
  -9   8   2   13.51    0.89
  -8   7   1   58.77    0.89
 -16   5   9   84.70    1.43
 -15   7   8   48.70    1.40
 -14   2   6   69.14    1.39
 -13  -3   8  140.89    1.43
 -13  -2   7   51.17    1.26
 -13   1   5   81.30    1.33
 -12   1   4  177.24    1.53
 -11   1   3   28.79    0.90
 -10   2   2   72.17    0.98
 -17   6  12    0.07    0.88
 -16   4   9    1.58    1.09
 -16   8  11   -0.17    0.97
 -15   1   8   15.55    1.38
 -14  -3  10   77.60    1.37
 -14  10   9    7.06    0.98
 -13   6   5    6.97    1.27
 -11   6   3   30.45    1.12
 -10   5   2   87.59    1.17
 -16  -1  12    0.84    1.03
 -15   8   9    4.62    1.14
 -15   9  10   11.67    1.03
 -14   3   6   19.96    1.22
 -14   4   6   69.04    1.44
 -13   2   5    2.46    1.04
 -12  -2   6   97.87    1.34
 -12   6   4   85.57    1.33
 -11  -4   7   24.44    0.83
 -11   2   3   16.09    0.88
 -10  -4   6  184.07    1.28
 -10  -2   4  275.58    1.54
 -10   3   2   12.63    0.76
 -17   3  12   66.97    1.34
 -17   5  12   14.81    1.06
 -14  -2   9  106.83    1.56
 -14  -1   8   31.14    1.35
 -13   3   5  171.64    1.85
 -13   5   5    1.97    1.11
 -12   2   4  301.89    1.91
 -11  -2   5   64.22    1.06
  -8   6   1   40.15    0.80
 -17   1  14    7.08    1.08
 -16   6  10   17.74    1.10
 -15  -1  10   19.00    1.30
 -15   0   9   23.93    1.22
 -13   4   5   65.62    1.36
 -12   3   4   76.69    1.29
 -12   8   5   18.88    1.02
 -11  -3   6  349.61    1.77
 -11   3   3   67.75    1.12
 -11   4   3  191.05    1.55
 -11   8   4  323.55    2.02
 -10  -3   5   42.85    0.80
  -9   7   2  461.35    2.02
 -16  -1  13   60.40    1.30
 -16   5  10    7.66    1.29
 -15   3   8  231.03    2.05
 -15   5   8   64.95    1.46
 -14  -3  11  114.20    1.55
 -14   1   7   45.50    1.32
 -13   9   7    4.24    1.17
 -13  10   8   16.21    1.11
 -17   3  13   13.32    1.14
 -16   0  12    7.27    1.30
 -16   4  10   47.95    1.35
 -15  -2  12   66.30    1.45
 -13  -3   9   57.93    1.22
  -8   5   1 1062.93    2.64
 -17   2  14    3.44    1.02
 -17   4  13    8.08    1.04
 -16  -1  14    2.33    1.06
 -15   9  11   18.25    1.08
 -14   2   7   47.23    1.56
 -14  10  10   64.13    1.24
 -13  -2   8    2.45    1.10
 -13  -1   7   22.66    1.10
 -10   7   3  105.10    1.33
 -16  -1  15   13.59    1.03
 -15   8  10    2.59    1.11
 -14   9   9    6.20    1.19
 -12   7   5  101.86    1.58
 -11   9   5   -0.35    1.05
  -9   6   2   93.37    1.14
 -17   2  15   63.13    1.20
 -17   3  14   72.98    1.30
 -17   4  14    2.51    1.03
 -16   2  11   35.13    1.30
 -15  -2  13    5.92    1.14
 -15  -1  11   68.80    1.40
 -15   6   9  165.90    1.83
 -14  -1   9   54.65    1.44
 -14   3   7  197.36    1.93
 -14   5   7  197.60    1.95
 -12  -1   6    2.59    0.92
 -16   5  11   80.23    1.47
 -13   2   6    9.73    1.14
 -12  -2   7   38.87    1.17
 -11   1   4   32.29    0.96
  -9   5   2    7.44    0.76
 -16   4  11   22.08    1.24
 -15   5   9   67.96    1.53
 -15   9  12   14.22    1.06
 -14   7   8   41.48    1.34
 -13  -3  10  392.47    2.27
 -12   6   5   67.84    1.48
 -10   6   3  159.33    1.43
 -16   6  12   26.35    1.30
 -14   1   8   30.10    1.30
 -14  10  11    0.33    0.88
 -13   3   6  558.36    2.75
 -13   4   6    2.23    1.16
 -13   9   8   11.72    1.24
 -13  10   9   34.77    1.26
 -12   2   5  351.23    2.10
 -11  -2   6    4.64    0.89
 -11   2   4    2.31    0.99
 -11   6   4   44.98    1.14
 -10   2   3    2.19    0.72
 -16   2  12   90.75    1.55
 -15   8  11   25.17    1.22
 -14   8   9   95.88    1.69
 -12   3   5   84.09    1.52
 -12   8   6   55.43    1.30
 -10  -3   6    2.93    0.72
 -10  -2   5  221.43    1.43
 -10   3   3   13.32    0.77
 -10   5   3    6.23    0.83
  -8   7   2   11.11    0.78
 -16   0  16   84.77    1.34
 -16   3  12   35.07    1.31
 -16   5  12   34.42    1.28
 -15   0  11    4.31    1.15
 -15   6  10   45.90    1.59
 -14   2   8   48.78    1.43
 -13  -1   8  268.00    1.97
 -13   7   7   26.76    1.44
 -12   0   6   31.26    1.09
 -11   3   4   49.36    1.10
 -11   4   4   10.08    1.12
 -11   8   5   12.19    1.01
 -10   4   3   27.97    0.91
 -10   8   4  371.22    2.05
 -16   4  12    7.52    1.15
 -16   6  13   18.90    1.26
 -14  -1  10    0.94    1.11
 -14   5   8   14.58    1.53
 -13   1   7   19.09    1.19
 -12   9   7   20.38    1.32
 -11   0   5  595.96    2.46
 -10   0   4  167.86    1.39
 -15   3  10   28.68    1.61
 -15   5  10   55.57    1.50
 -14   4   8   93.28    1.66
 -14  10  12   10.14    0.94
 -13  -3  11    0.81    1.17
 -12  -3   9    6.53    1.10
 -12  10   8   11.00    1.18
 -16   3  13   20.35    1.39
 -15   4  10    1.77    1.26
 -15   8  12   -0.13    1.05
 -14   7   9   10.53    1.23
 -12  -1   7    6.69    0.97
 -12   7   6   14.36    1.14
  -9   7   3   70.16    1.11
 -16   1  16    2.61    1.02
 -16   4  13   11.29    1.19
 -16   6  14    1.86    1.05
 -15  -1  14    2.43    1.22
 -14   1   9   59.01    1.47
 -14   9  11    3.13    1.15
 -13   2   7   40.26    1.33
 -13  10  10   16.45    1.10
 -12  -2   8   74.49    1.25
 -12   1   6   16.50    1.06
 -10   7   4  157.23    1.58
 -10   9   5   89.71    1.40
 -13  -2  10   81.64    1.48
 -13   3   7   71.18    1.49
 -13   9   9   23.14    1.26
 -11  -1   6   80.36    1.16
 -16   3  14    0.44    1.17
 -16   4  14   50.07    1.45
 -16   5  14   13.30    1.17
 -15  -1  16    9.88    1.08
 -15   2  11   44.43    1.47
 -15   7  12   47.15    1.50
 -15   8  13   23.02    1.14
 -14  -1  11   27.19    1.27
 -14   0  10    4.01    1.17
 -14   2   9   90.51    1.83
 -14   6   9   -0.04    1.24
 -13  -1   9    6.16    1.07
 -12   6   6    6.04    1.14
 -11  -3   8   23.73    0.99
 -10  -1   5   54.35    0.93
 -10   1   4  521.40    2.14
 -16   2  16    5.45    1.14
 -16   5  15   33.11    1.28
 -15   0  13  500.96    2.79
 -15   1  12   13.69    1.48
 -15   4  11  191.49    2.21
 -15   5  11   16.85    1.34
 -13   7   8  104.74    1.83
 -12   2   6  111.76    1.49
 -12   8   7   42.80    1.32
 -11  -2   7    8.34    0.84
 -11   6   5  216.94    1.90
  -9   6   3  345.93    1.82
  -8   8   3   68.95    1.09
 -16   3  15   21.83    1.22
 -16   4  15    8.08    1.07
 -14   3   9  144.00    1.87
 -14   4   9    3.49    1.31
 -14   9  12    2.79    1.15
 -13   1   8  207.59    2.05
 -13  10  11   90.89    1.55
 -12  -3  10    4.10    1.11
 -12   3   6   45.59    1.28
 -12   4   6   16.44    1.37
 -10   6   4   19.24    0.93
  -9   2   3  282.24    1.55
 -15   6  12    0.62    1.39
 -14  -2  14   45.53    1.29
 -14   8  11    1.42    1.30
 -12   9   8   12.97    1.20
 -11   8   6    7.19    1.19
 -10  -2   6  627.54    2.29
  -9   3   3  105.09    1.16
  -9   5   3   44.90    0.91
 -15   1  13   61.28    1.63
 -14  -1  12  315.34    2.27
 -13   8   9    8.76    1.22
 -13   9  10    5.62    1.29
 -12  -1   8   11.66    1.15
 -11   3   5  119.38    1.40
 -11   4   5   75.10    1.29
 -10   3   4   15.11    0.98
 -10   8   5   17.48    1.11
  -9   8   4    6.02    0.87
 -15   0  17   79.81    1.36
 -15   3  12    5.05    1.29
 -15   4  12    8.36    1.53
 -15   5  12   19.58    1.34
 -14   6  10    4.35    1.54
 -14   9  13    8.45    1.21
 -13   0   9    2.75    1.12
 -12  -2   9  242.14    1.83
 -12   7   7   54.20    1.40
 -10   4   4  124.25    1.31
 -15   6  13   37.92    1.52
 -14   2  10   83.47    1.64
 -13  -1  10  206.44    1.90
 -13   3   8  155.81    1.99
 -13   5   8  182.14    1.98
 -13  10  12   11.17    1.21
 -11   9   7   96.70    1.54
 -11  10   8    1.69    1.19
 -15   1  14    1.15    1.18
 -14   3  10   77.78    1.66
 -14   5  10   17.10    1.40
 -13   4   8   64.75    1.54
 -12  -3  11   51.58    1.34
 -11  -3   9   72.01    1.29
 -11   7   6   12.10    1.26
  -8   7   3  351.63    1.79
 -15   7  15   -0.77    1.01
 -14   4  10  252.72    2.28
 -12  10  10   10.09    1.23
  -9   9   5  294.08    1.97
 -15   1  15   12.96    1.29
 -15   1  17   -0.47    1.04
 -15   4  13    3.44    1.24
 -15   6  14   35.79    1.38
 -14  -1  14    1.52    1.32
 -14   0  12   50.43    1.45
 -13   8  10   11.06    1.43
 -13   9  11   11.89    1.39
 -12   9   9   88.12    1.70
 -10   7   5   24.25    1.05
 -14   6  11    4.74    1.30
 -12  -2  10  213.22    1.85
 -12   3   7    4.31    1.12
 -12   4   7   25.42    1.44
 -11   6   6    7.40    1.25
 -10   1   5   27.57    0.87
 -15   2  15   23.50    1.42
 -15   3  14   53.53    1.45
 -15   4  14    3.39    1.39
 -15   5  14    7.71    1.17
 -15   6  15    9.80    1.16
 -14  -1  15   69.20    1.56
 -14  -1  16    0.90    1.18
 -14   2  11    4.03    1.28
 -14   7  12   14.20    1.48
 -13  -1  11    9.73    1.16
 -13   2   9   14.89    1.27
 -13   6   9  138.36    1.86
 -11   8   7   18.35    1.30
  -8   6   3   54.13    0.94
 -15   2  16    6.17    1.28
 -15   2  17   44.10    1.34
 -15   6  16   22.44    1.12
 -14   3  11  146.70    1.93
 -14   4  11   21.54    1.65
 -13  -2  13   15.84    1.18
 -12   7   8    2.80    1.20
 -12  11  13   38.57    1.20
 -11   5   6   28.11    1.32
 -10   6   5    1.02    0.88
  -9   6   4   51.10    1.08
 -15   3  15   41.58    1.41
 -15   5  16    2.69    1.15
 -13   3   9   38.75    1.42
 -13   9  12    1.95    1.20
 -12   1   8   13.07    1.29
 -12  10  11    8.76    1.31
 -11  -3  10    9.25    1.02
 -11   3   6  376.07    2.13
 -11   9   8    4.00    1.23
 -10   2   5  239.92    1.58
 -15   4  17    4.89    1.02
 -14   0  14    9.64    1.38
 -14   6  12   27.40    1.40
 -14   7  13    4.53    1.37
 -13  -2  14  193.16    1.94
 -13   8  11   20.58    1.44
 -12   8   9   11.76    1.41
 -10   8   6  195.60    1.72
  -8   5   3   46.09    0.84
  -8   8   4    8.00    0.86
 -14   0  18    4.37    1.00
 -14   1  13  116.62    1.87
 -14   2  12   95.91    1.71
 -13  -1  12  679.75    3.08
 -12   9  10    0.55    1.22
 -10   3   5   62.75    1.07
 -10   4   5  105.64    1.26
  -9   3   4  137.04    1.20
  -9   5   4   18.06    0.80
  -9   8   5   86.60    1.22
 -14   3  12  136.93    1.90
 -14   4  12    8.01    1.57
 -13   0  11   39.93    1.34
 -13   6  10   43.82    1.49
 -13   9  13    6.84    1.32
 -12  -2  11   47.29    1.22
 -12   2   8   60.01    1.35
 -11  -2   9    7.24    0.87
 -11   7   7    1.03    1.07
 -10   9   7  103.47    1.58
  -9   4   4   25.76    0.81
 -14   7  14    2.27    1.23
 -12  -1  10   84.78    1.40
 -12   3   8   80.49    1.47
 -12   5   8   29.21    1.31
 -12  10  12   23.70    1.36
 -11   1   7  156.80    1.50
 -10  10   8    4.35    1.17
 -14   1  14   -1.87    1.17
 -14   7  15   17.63    1.32
 -13  -1  13  120.11    1.74
 -13   3  10  318.87    2.39
 -13   5  10   44.44    1.50
 -13   8  12    0.35    1.17
 -13   9  14   13.84    1.20
 -12   4   8   63.40    1.44
 -12   7   9   37.41    1.53
 -10   7   6  140.71    1.63
  -9   9   6   23.62    1.15
 -14   1  18   10.90    1.10
 -14   3  13    8.98    1.53
 -14   5  13   50.36    1.52
 -14   7  16   14.55    1.19
 -11  -3  11   71.34    1.33
 -11   8   8   81.61    1.49
 -10  -3   9   16.63    0.81
 -14   1  15   70.22    1.54
 -14   1  16    1.64    1.31
 -14   1  17   17.20    1.22
 -14   4  13    2.57    1.29
 -14   6  14    1.53    1.17
 -13   9  15   13.49    1.07
 -12  -2  12   22.12    1.20
 -12   1   9   13.55    1.12
 -12  10  13    2.55    1.22
 -11   2   7   14.91    0.98
 -11   9   9    3.30    1.09
 -10   1   6  306.66    1.74
  -9   7   5  180.32    1.51
 -14   5  14    9.06    1.47
 -14   6  15   71.81    1.61
 -12   6   9   15.52    1.50
 -11   3   7    0.62    0.95
 -11   5   7    1.22    1.05
 -10   6   6  624.73    2.71
 -14   2  18   41.56    1.21
 -14   6  16    9.69    1.12
 -14   6  17   41.59    1.23
 -13   2  11   38.75    1.41
 -13   7  12  162.24    1.96
 -12  -1  11  457.51    2.56
 -12   0  10   17.04    1.13
 -12  10  14    4.21    1.10
 -11  -2  10    4.09    0.98
 -11   4   7   40.03    1.18
 -11  11  13   21.24    1.17
  -9   1   5   63.64    0.92
 -14   2  16   61.71    1.49
 -14   2  17   14.68    1.21
 -14   3  18   20.86    1.20
 -13   0  13   18.97    1.42
 -13   4  11    7.16    1.54
 -13   5  11   12.32    1.36
 -12  -2  13  115.68    1.65
 -12   5   9    2.89    1.21
 -12   9  12   55.87    1.62
 -11  -1   9   93.53    1.28
 -11   7   8   66.18    1.42
 -11  10  11    2.50    1.28
 -10   2   6  679.67    2.50
  -9   6   5   31.82    0.99
 -14   4  15   32.71    1.36
 -14   4  18   43.89    1.27
 -14   5  17   10.58    1.12
 -12   3   9    9.47    1.18
 -12   4   9   11.07    1.23
 -11  11  14   27.66    1.07
 -10   3   6    8.66    0.83
 -10   5   6    9.23    0.93
  -8   6   4   40.44    0.84
 -14   4  17   14.74    1.20
 -13   6  12    1.99    1.29
 -13   7  13   11.28    1.27
 -13   8  16   -2.31    1.10
 -12   8  11    1.37    1.20
 -11   1   8   35.13    1.07
 -11   8   9   37.01    1.45
 -11   9  10  117.38    1.77
 -10  -3  10   54.64    1.10
 -10   4   6   73.27    1.16
  -9   8   6    2.59    0.86
 -13   2  12    0.94    1.24
 -12  -1  12   65.07    1.49
 -12   9  13   61.22    1.57
  -8   5   4   60.47    0.96
 -13   0  15  224.33    2.18
 -13   0  17   15.07    1.23
 -13   1  13  114.54    1.71
 -13   3  12    3.12    1.28
 -13   7  14    3.61    1.38
 -12   6  10    4.42    1.24
 -11  -2  11  109.01    1.49
 -10   7   7   15.56    1.04
 -13   6  13   17.71    1.36
 -12   2  10  203.40    1.90
 -12   9  14    0.58    1.30
 -11   0   9   34.85    1.07
 -11   5   8  118.06    1.55
 -10  -2   9    0.72    0.70
 -13   1  14   90.03    1.60
 -13   2  13   13.31    1.32
 -13   7  15    7.08    1.22
 -13   7  17   73.13    1.45
 -12  -1  13  101.59    1.61
 -12   3  10    3.57    1.37
 -12   5  10  244.61    2.15
 -12   8  12  166.26    1.93
 -11  -1  10    7.10    0.93
 -11   3   8   22.61    1.06
 -11   4   8   18.45    1.11
 -10   1   7    2.97    0.76
 -10  10  10   21.06    1.35
 -10  11  12   23.91    1.26
  -9   7   6   96.65    1.34
 -13   1  18    8.24    1.08
 -13   3  13    6.76    1.52
 -13   5  13    1.83    1.30
 -13   6  14   34.40    1.41
 -12   4  10   14.19    1.25
 -12   9  16   55.34    1.36
 -11   9  11   26.83    1.42
 -11  10  13  127.94    1.77
 -10   8   8  120.42    1.56
 -10   9   9  185.04    1.89
 -13   1  15   66.83    1.48
 -13   1  16   11.51    1.39
 -12   0  12  830.17    3.37
 -11  -2  12   22.11    1.16
 -11   8  10    1.28    1.13
  -9  -3   9  114.82    1.16
  -8   7   5    2.68    0.78
  -7   7   4   18.94    0.74
 -13   2  18    0.75    1.14
 -13   5  14   19.58    1.36
 -13   6  15   87.17    1.60
 -13   6  16    1.48    1.27
 -13   6  17   11.60    1.11
 -12   6  11    1.91    1.25
 -11   1   9  102.49    1.36
 -11  10  14    5.64    1.07
 -10   2   7  151.23    1.37
 -10   5   7  161.81    1.53
  -9  -1   7   87.96    0.99
  -9   1   6    7.51    0.66
 -13   2  17   11.11    1.31
 -13   3  14  110.42    1.76
 -13   4  14   13.06    1.33
 -13   5  18   13.05    1.09
 -12  -1  15  210.53    2.03
 -12  -1  16   74.66    1.54
 -12  -1  17    9.68    1.20
 -12   7  12   41.69    1.47
 -11   6   9   16.12    1.20
 -11  10  15   20.54    1.07
 -10   3   7    3.75    0.81
 -10   4   7    4.82    0.88
 -10  11  14    5.39    1.04
  -9   6   6  276.87    1.74
  -9   8   7   14.42    1.09
 -13   3  15   11.28    1.27
 -13   3  18   24.42    1.20
 -13   4  15    0.93    1.43
 -13   4  18   24.72    1.19
 -13   5  15    7.25    1.29
 -13   5  16    3.19    1.14
 -13   5  17    2.20    1.16
 -12   5  11   52.61    1.49
 -11   2   9   17.16    1.04
 -11   9  12   58.44    1.44
 -10  -2  10  228.73    1.64
 -10   7   8  226.83    1.87
 -10  10  11   27.20    1.27
  -9  10   9   89.29    1.52
 -13   3  16   35.69    1.36
 -13   4  16    0.95    1.15
 -12   6  12    3.84    1.49
 -12   8  16    8.50    1.20
 -12   8  17   41.96    1.22
 -11  -2  13  247.91    1.91
 -11   5   9    1.77    1.08
 -11   8  11   57.63    1.61
 -10  -1   9   39.26    0.93
  -9   9   8  481.27    2.46
  -8   6   5   37.10    0.90
 -12   0  18   14.84    1.11
 -11   4   9  110.80    1.55
 -10   8   9   36.40    1.36
 -10   9  10    5.68    1.10
  -8   8   6  181.46    1.50
 -12   0  14   93.16    1.54
 -12   1  19   22.01    1.12
 -12   5  12   39.25    1.63
 -11  -2  14   35.06    1.27
 -10   1   8   21.16    0.85
 -10  10  12   72.26    1.54
  -9   3   6  175.62    1.32
  -9   4   6  300.79    1.68
 -12   0  16    3.45    1.28
 -12   1  13  109.74    1.61
 -12   4  12    1.77    1.22
 -12   6  13   18.24    1.55
 -12   7  14    1.18    1.19
 -11  -1  12  124.59    1.48
 -11   6  10    3.98    1.15
 -11   9  14    7.93    1.28
  -9  -3  10   94.05    1.13
  -9   7   7  124.93    1.45
  -8   9   7   13.17    1.01
  -8  10   8  224.02    1.86
 -12   7  15  126.05    1.73
 -12   7  16   28.19    1.38
 -12   7  17    6.94    1.10
 -11   0  11  491.85    2.45
 -11   8  12   46.96    1.41
 -11   9  15   22.46    1.28
 -11   9  16   43.91    1.32
 -10   2   8  117.12    1.35
  -9  10  10    2.55    1.19
  -9  11  12   10.78    1.21
 -12   1  14   18.76    1.22
 -12   2  13  112.82    1.68
 -12   2  19   24.89    1.11
 -12   5  13   87.88    1.83
 -12   6  18   26.01    1.19
 -11   2  10    6.29    1.00
 -11   5  10   34.92    1.27
 -10   5   8   52.11    1.16
 -10   9  11   64.57    1.53
 -12   1  15  210.86    2.09
 -12   1  17    8.53    1.30
 -12   3  19   24.05    1.20
 -12   4  13    7.78    1.48
 -12   6  14    6.61    1.25
 -11  -1  13  135.97    1.64
 -11   4  10   65.29    1.37
 -10  -1  10  176.96    1.46
 -10   4   8  426.39    2.18
 -10   7   9    2.40    1.04
  -9  -2   9  102.25    1.05
  -9   8   8   92.77    1.34
  -9   9   9  212.54    1.90
  -9  11  13    4.01    1.07
  -7   9   6  169.89    1.44
 -12   1  16   93.14    1.56
 -12   2  18    4.18    1.19
 -12   5  18   38.40    1.31
 -12   6  15   10.25    1.24
 -10   8  10   38.18    1.25
 -10  10  15   11.51    1.14
 -10  10  16    9.38    0.98
  -9   1   7   47.29    0.83
  -9   6   7  604.52    2.46
  -9  11  14    2.53    1.04
 -11  -1  17   26.57    1.22
 -11   0  19    3.58    1.01
 -11   6  11   52.96    1.41
 -11   7  12   78.38    1.58
  -9  11  15    3.16    0.88
  -7   7   5   46.52    0.86
 -12   2  17    2.62    1.12
 -12   5  16   11.15    1.25
 -12   5  17   42.02    1.33
 -11  -1  15  163.08    1.82
 -11  -1  16   45.29    1.38
 -11   8  17   16.23    1.09
 -10   1   9   42.77    0.97
 -10   9  12  122.69    1.67
  -9   2   7  108.74    1.09
  -9   5   7    0.05    0.74
  -9  10  11  133.49    1.67
 -12   3  15    5.13    1.22
 -12   3  16   13.52    1.24
 -12   4  15   -0.07    1.20
 -12   4  17    6.25    1.12
 -11   5  11   48.74    1.37
  -8   8   7   57.20    1.05
  -8  10   9   81.69    1.31
 -11   0  13  243.82    1.94
 -11   3  11   64.41    1.35
 -11   6  12   96.28    1.62
 -11   7  13   78.42    1.57
 -11   7  18   58.71    1.35
 -10  -1  11    6.64    0.95
 -10   0  10   11.04    0.82
 -10   2   9    0.83    0.81
 -10   5   9   22.19    1.05
 -10   8  11    6.44    1.12
 -10   9  13   15.09    1.36
  -9   3   7    9.88    0.70
  -9   7   8    5.58    0.90
 -11   1  19   80.93    1.46
 -10   3   9   16.02    1.06
 -10   4   9   23.59    1.02
 -10   9  17   94.19    1.46
  -9   8   9  110.98    1.55
  -9  10  12   14.45    1.28
 -11   0  17    3.56    1.18
 -11   5  12    5.38    1.19
 -11   7  14  172.71    1.93
 -10   9  14   10.13    1.22
 -10   9  16   17.83    1.17
  -9  -1   9   77.69    0.97
  -8  11  12   23.32    1.23
 -11   1  13  215.57    2.00
 -11   2  19    1.80    1.08
 -11   3  12   23.66    1.39
 -11   4  12   25.63    1.44
 -11   5  19    3.93    1.07
 -11   6  13    4.64    1.22
 -11   7  16    6.30    1.12
 -10  -2  14  122.39    1.44
 -10  -2  15  136.97    1.61
 -10   6  10   63.34    1.33
 -10   8  12    3.90    1.32
 -10   9  15   62.73    1.42
  -9  10  13    4.93    1.24
 -11   1  18   31.74    1.24
 -11   3  19   12.41    1.12
 -11   4  19   28.10    1.22
 -11   6  18    2.43    1.02
 -10  -1  12  366.99    2.11
  -9   1   8   23.93    0.72
  -9  10  16    0.50    1.01
  -8   4   6   15.15    0.66
  -8   7   7  114.40    1.28
  -8  10  10   20.58    1.22
  -6   8   5  439.45    1.81
 -11   2  13  258.26    2.16
 -11   5  13   41.79    1.39
 -11   6  14   12.85    1.27
  -9   9  11   11.07    1.11
  -9  10  14   -0.36    1.07
  -8  11  14   23.13    1.14
  -8  11  15   89.05    1.36
 -11   1  15  193.24    1.99
 -11   1  17   25.84    1.23
 -11   2  18    9.79    1.20
 -11   3  13    7.18    1.36
 -11   4  13  213.85    2.00
 -11   6  15   86.21    1.60
 -11   6  16  181.94    1.92
 -10   2  10  253.58    1.75
 -10   5  10   16.42    1.06
  -9  -2  11  153.41    1.34
  -9   2   8    5.20    0.67
  -9   5   8   10.20    0.82
  -9   7   9   14.72    1.00
  -9   8  10   79.29    1.45
  -8  -3  10   29.05    0.78
 -11   4  18    3.05    1.13
 -11   5  17    2.86    1.28
 -10   3  10   70.70    1.21
 -10   4  10   30.74    1.09
 -10   8  17   33.87    1.22
  -9   0   9  204.65    1.37
  -9   3   8 1076.64    2.99
  -9   4   8   14.79    0.80
 -11   2  16   56.05    1.56
 -11   2  17   29.28    1.23
 -11   3  14   41.52    1.34
 -11   4  14   14.44    1.25
 -11   5  15   12.48    1.25
 -11   5  16   34.41    1.34
 -10  -1  17    6.99    1.11
 -10   2  20   24.90    1.06
 -10   7  12    0.18    1.15
 -10   8  16   13.48    1.19
  -9   9  12   41.73    1.42
  -8   6   7    5.45    0.79
  -8  10  11    1.16    1.17
 -11   3  15   19.79    1.26
 -11   3  16  256.25    2.28
 -11   4  15   29.49    1.33
 -10  -1  14    8.67    0.94
 -10   0  12  207.51    1.66
 -10   6  19    1.59    1.02
 -10   7  18   -0.75    0.99
  -7  10   9   19.56    1.06
 -10  -1  15    6.81    1.00
 -10   0  18  133.98    1.64
 -10   1  19    7.21    1.08
 -10   5  11   11.89    1.08
  -9  -2  12  234.45    1.63
  -9   9  13  149.05    1.85
  -9   9  17   17.50    1.03
 -10   4  11   19.53    1.08
 -10   7  17   26.18    1.22
  -9   1   9  134.84    1.19
  -9   9  16   20.26    1.19
  -8   5   7  384.26    1.78
  -8   9  10    3.51    1.05
  -8  10  12   90.78    1.47
  -7   9   8  370.29    2.00
 -10   2  19   26.29    1.21
 -10   3  11  174.85    1.64
 -10   5  19   94.12    1.43
 -10   6  18   81.38    1.48
 -10   7  14   49.73    1.40
 -10   7  15   34.68    1.49
  -9   5   9    2.35    0.83
  -9   9  15    3.18    1.09
  -8   7   8    2.06    0.75
  -7   6   6   73.61    0.94
  -7  11  12  126.23    1.53
 -10   0  14   81.48    1.47
 -10   1  18   -0.01    1.17
 -10   3  19   36.63    1.26
 -10   4  19   27.05    1.17
 -10   5  12   14.55    1.32
 -10   6  13  140.45    1.87
  -9  -2  13   32.00    1.07
  -9  -1  11    3.60    0.71
  -9   2   9   89.32    1.07
  -9   8  18   14.00    0.98
  -8   3   7  423.01    1.74
  -8   4   7   13.65    0.65
  -8   8   9    5.92    0.89
  -8  10  16   73.73    1.31
  -7  11  13    0.61    1.07
  -7  11  15    0.17    0.98
 -10   0  16   16.25    1.07
 -10   2  12  445.64    2.33
 -10   6  17   14.34    1.31
  -9   1  20   38.10    1.13
  -9   4   9  102.57    1.19
  -9   8  12  111.59    1.55
  -8  10  14   38.62    1.24
  -7  10  10  345.61    2.14
  -7  11  14    5.00    1.07
 -10   1  13  158.54    1.61
 -10   2  18   68.74    1.50
 -10   4  12  171.55    1.71
 -10   5  18    6.29    1.12
 -10   6  14   28.94    1.30
 -10   6  16    5.90    1.35
  -9  -2  15    4.22    1.01
  -9  -1  18   16.26    1.10
  -9   6  10    0.72    0.92
  -9   8  17   20.70    1.22
  -8  -2  10   14.38    0.67
  -8   9  11   49.02    1.37
  -6   8   6   43.73    0.80
 -10   1  14    5.55    1.21
 -10   1  17   15.30    1.13
 -10   4  18    7.48    1.06
 -10   5  13   30.03    1.26
 -10   6  15    1.07    1.17
  -9   0  19   11.76    1.05
  -9   2  20  153.66    1.59
  -8  -1   9  509.62    1.85
  -6   9   7   38.51    0.93
 -10   1  15    8.05    1.06
 -10   1  16    3.34    1.07
 -10   2  13    4.17    1.02
 -10   2  17   20.85    1.32
 -10   5  14    3.10    1.21
  -9  -1  12   38.29    0.94
  -9   3  20   42.84    1.18
  -9   5  10   13.40    1.08
  -9   6  19  100.57    1.45
  -9   7  18   75.26    1.41
  -9   8  16   -0.65    1.03
  -7   9   9    4.04    0.92
 -10   5  15  170.04    1.87
  -9  -1  17    1.29    1.06
  -9   0  11    5.17    0.71
  -8   7   9  101.14    1.25
  -8   8  10  308.87    1.97
  -8   9  17    6.31    0.96
  -7   8   8   30.52    0.98
  -7  10  11   20.39    1.20
 -10   3  14   24.46    1.19
 -10   4  14   70.89    1.44
 -10   4  15   -0.81    1.13
 -10   4  16  316.90    2.31
  -9  -1  13    4.27    0.91
  -9   1  19   18.74    1.15
  -9   2  10  229.32    1.53
  -9   3  10   80.66    1.19
  -9   4  10   24.66    0.93
  -9   6  11  106.76    1.42
  -8   5   8   19.76    0.75
  -9  -1  16   11.84    1.13
  -9   5  19    1.37    0.98
  -9   7  17    0.53    1.01
  -8  -2  11   72.08    0.91
  -8   2   8   16.51    0.64
  -8   4   8  127.79    1.12
  -8   9  13   19.30    1.13
  -8   9  16   27.43    1.17
  -7  10  16    1.75    1.05
  -6  10   9   71.12    1.20
  -9   2  19   12.62    1.09
  -9   4  19   84.79    1.46
  -9   6  18    1.08    1.02
  -9   7  16   12.72    1.14
  -8   3   8    6.10    0.59
  -8   8  11   13.57    1.16
  -8   8  18   43.16    1.11
  -8   9  14    0.02    1.00
  -8   9  15    9.38    1.07
  -7   6   7   30.83    0.80
  -7  10  12   -0.10    1.01
  -6  11  12  118.13    1.56
  -6  11  15    5.62    0.97
  -9   0  17   20.18    1.22
  -9   3  19    1.65    1.03
  -9   6  12   28.93    1.15
  -9   7  14   86.93    1.51
  -9   7  15    1.68    1.10
  -8   1  20   75.43    1.27
  -7   9  10  117.73    1.46
  -7  10  13   13.36    1.21
  -7  10  15  144.05    1.70
  -6  11  13    5.87    1.08
  -9   1  18   45.08    1.26
  -9   5  18   42.71    1.37
  -8   7  10    4.22    0.89
  -9   0  13    4.92    0.83
  -9   2  18    2.52    1.13
  -9   6  13   12.42    1.11
  -8   2  20   81.43    1.30
  -7   7   8   28.85    0.79
  -7   8   9   94.39    1.25
  -6   8   7    3.50    0.57
  -9   0  15   57.33    1.20
  -9   1  17   -0.20    1.18
  -9   4  18    3.09    1.02
  -9   5  12   16.14    1.04
  -9   6  14    2.60    1.10
  -9   6  15    9.89    1.35
  -9   6  16    2.63    1.10
  -8  -2  13   29.99    0.96
  -8  -1  18   -0.97    0.87
  -8   3  20   50.13    1.13
  -8   5   9   71.27    1.01
  -8   6  19   50.73    1.18
  -8   7  18    6.33    1.07
  -7   9  17    0.53    0.96
  -6  10  10   37.89    1.15
  -9   4  12   27.45    1.06
  -9   5  17  104.67    1.55
  -8  -2  15  252.29    1.77
  -8  -1  11  226.92    1.41
  -8   8  13    3.25    1.04
  -9   1  16   11.59    1.02
  -9   2  17    9.58    1.08
  -9   4  17   22.21    1.18
  -9   5  13   29.91    1.16
  -8   0  10 1029.10    2.65
  -8   2   9    1.35    0.57
  -8   3   9  196.60    1.30
  -8   4   9    1.58    0.64
  -9   1  14  111.32    1.40
  -9   1  15  209.69    1.78
  -9   2  13   85.16    1.28
  -9   3  17    2.86    1.08
  -9   4  13  395.80    2.25
  -9   5  15   27.01    1.23
  -8  -1  17   17.23    1.10
  -8   1  19    0.30    0.96
  -8   5  19   46.96    1.20
  -8   7  17  191.61    1.80
  -7   8  18   19.38    0.99
  -7   9  12    4.67    0.98
  -7   9  16   30.52    1.17
  -6  10  11  283.82    1.98
  -5   8   6    4.18    0.58
  -5  11  15   12.64    0.95
  -9   3  13   95.97    1.35
  -9   3  16   77.51    1.43
  -9   4  14   29.61    1.18
  -9   4  15  196.43    1.97
  -8  -1  12    1.88    0.73
  -8   0  18  113.75    1.54
  -8   2  19    2.34    1.07
  -8   4  19    3.02    1.06
  -8   6  18   83.08    1.37
  -7   8  10   75.37    1.17
  -7   9  13   23.09    1.26
  -7   9  15   70.65    1.45
  -6   9   9   36.09    0.90
  -9   3  14   26.40    1.12
  -9   3  15   27.91    1.17
  -8  -1  16    8.71    1.05
  -8   5  10   18.16    0.83
  -8   6  11   11.08    1.07
  -8   7  16    8.71    1.08
  -7   1  20   83.39    1.29
  -7   7   9   37.37    0.88
  -7   9  14    4.22    1.01
  -6   7   7   90.79    0.92
  -6  10  12  104.57    1.50
  -5  11  12  152.95    1.55
  -5  11  13    0.64    1.01
  -5  11  14  152.57    1.54
  -8   4  10    3.73    0.83
  -8   5  18   30.62    1.28
  -8   7  14   23.79    1.22
  -6  10  13   15.19    1.06
  -6  10  14   49.07    1.24
  -5  10   9   60.93    1.12
  -8  -1  14   46.27    1.09
  -8   1  18    2.08    1.02
  -8   6  17   78.13    1.40
  -7   2  20   35.75    1.02
  -7   3  20    9.00    0.90
  -7   5   8  121.08    1.04
  -7   6  19    5.96    0.89
  -7   8  11   43.95    1.08
  -6   9  17    4.20    0.97
  -8   2  18   31.22    1.28
  -8   4  18   12.90    1.06
  -8   5  11   39.27    1.00
  -8   6  12   19.86    1.02
  -7   0  19   34.53    1.13
  -7   7  18    2.80    0.96
  -8   0  12    1.65    0.65
  -8   0  16   30.22    1.16
  -8   5  17   11.45    1.11
  -8   6  13    3.10    1.17
  -8   6  16   39.95    1.27
  -7  -2  11  153.07    1.13
  -7  -1  18   38.26    1.05
  -7   4   8  343.27    1.51
  -7   7  10  244.93    1.69
  -7   8  12   18.90    1.18
  -6   0  20  144.65    1.41
  -6   8  18    0.84    0.94
  -8   1  17   12.59    1.04
  -8   4  11   63.09    1.04
  -8   6  15   13.97    1.13
  -7   3   8  656.95    1.97
  -7   5  19    2.26    0.95
  -7   8  13   70.70    1.43
  -6   6   7  282.53    1.38
  -6   7  19    2.11    0.83
  -6   9  16    5.95    1.10
  -5   9   8   30.20    0.87
  -5  10  10    1.05    0.94
  -5  10  16    0.75    0.87
  -4  11  15   20.02    1.00
  -8   0  14  183.13    1.60
  -8   2  17    4.28    1.19
  -8   4  17   12.65    1.10
  -8   5  12   18.00    0.97
  -8   5  16    3.58    1.08
  -7  -1  10  535.03    1.80
  -7   1  19    5.73    0.94
  -7   6  18    7.11    1.11
  -6   8   9   63.77    0.98
  -6   9  11   12.66    0.90
  -8   3  17   68.83    1.36
  -8   5  15    7.09    1.25
  -7  -2  12   19.20    0.67
  -7  -2  15   80.14    1.18
  -7   2  19    6.20    1.12
  -7   4  19   31.91    1.13
  -6   1  20    0.04    0.76
  -6   7   8  153.99    1.16
  -5   8   7    6.91    0.54
  -5  10  15   12.61    1.06
  -4  11  14   19.46    1.05
  -8   1  13  382.86    2.00
  -8   1  15    1.43    1.06
  -8   2  12   57.36    1.00
  -8   3  12  551.22    2.32
  -8   4  12  769.69    2.72
  -8   4  16    7.47    1.08
  -7  -2  13   22.09    0.85
  -7  -1  17    6.78    0.91
  -7   5   9   90.85    0.97
  -7   7  16   18.03    1.26
  -6   2  20   12.73    0.90
  -6   8  17    4.38    1.07
  -6   9  12   77.47    1.25
  -6   9  13   31.49    1.22
  -6   9  14   55.12    1.37
  -5  10  11   12.45    0.94
  -4  11  12   38.54    1.19
  -4  11  13    1.67    0.98
  -8   3  16   23.63    1.13
  -8   4  13   10.58    0.95
  -8   4  15    3.71    1.03
  -7   5  18   12.98    1.00
  -7   6  10  116.34    1.18
  -6   3  20   18.46    0.91
  -6   6  19    0.83    0.86
  -6   7  18   18.90    1.07
  -5   9  17    2.55    0.88
  -5  10  12  133.02    1.54
  -5  10  13    2.32    1.06
  -5  10  14   64.59    1.26
  -8   2  13   32.74    0.96
  -8   2  14   25.07    1.02
  -8   3  13  153.07    1.44
  -8   3  14   42.37    1.25
  -7  -1  11   35.17    0.72
  -7   1  18   37.44    1.23
  -7   4   9    6.22    0.57
  -7   7  15   47.35    1.25
  -6   8  10   86.57    1.13
  -5   9   9   -0.47    0.78
  -7  -1  16  134.03    1.40
  -7   2   9   72.10    0.79
  -7   3   9  137.36    1.02
  -7   4  18   17.11    1.04
  -7   7  13   31.21    1.13
  -5   8  18    4.79    0.84
  -4   9   7   52.34    0.82
  -4  10  16    2.96    0.93
  -3  11  15    4.74    0.88
  -7   0  17   83.09    1.27
  -7   2  18    2.01    0.93
  -7   5  10   78.58    0.99
  -7   5  17   33.35    1.32
  -7   6  11   24.90    0.89
  -7   6  16    3.88    1.03
  -6  -1  18    1.39    0.90
  -6   5  19    2.77    0.90
  -6   6   8  127.01    1.01
  -6   7   9   31.14    0.76
  -5   9  16   12.03    1.05
  -4  10   9  215.32    1.52
  -7  -1  12  136.66    1.10
  -6   1  19    4.53    1.00
  -6   6  18    1.35    1.03
  -6   7  17   59.99    1.36
  -6   8  11   32.10    0.95
  -5   1  20   76.72    1.14
  -5   8   8   17.52    0.69
  -7  -1  13   54.33    0.88
  -7  -1  14  556.27    2.21
  -7   4  10   74.01    0.92
  -7   4  17    6.18    1.19
  -6   2  19   29.83    1.13
  -6   8  12   22.31    1.11
  -5   2  20    3.76    0.82
  -5   7   7  148.54    1.00
  -3  11  14  129.91    1.41
  -7   0  11   28.90    0.65
  -7   2  10    5.09    0.55
  -7   2  17   14.07    1.18
  -7   3  10  128.91    1.11
  -7   3  17    3.81    1.17
  -7   5  11    3.03    0.73
  -7   5  16    8.64    1.06
  -6   8  13   14.06    0.98
  -5   3  20    5.10    0.79
  -5   6  19    2.67    0.83
  -5   9  15   29.08    1.06
  -4   9  17    3.85    0.86
  -4  10  10    4.12    0.86
  -3  11  13    5.84    0.98
  -6   0  18    3.49    1.02
  -6   5   8   32.49    0.63
  -6   7  10    6.88    0.73
  -5   9  11  134.80    1.41
  -5   9  14  112.63    1.51
  -4   8  18    2.70    0.86
  -4  10  14  212.00    1.78
  -2  11  15   19.38    0.90
  -7   0  15   56.30    1.07
  -7   4  11  121.51    1.15
  -7   4  16    0.81    1.00
  -7   5  12  567.09    2.32
  -7   5  15   93.88    1.40
  -6  -1  17   11.44    0.99
  -5   9  12    7.05    1.01
  -5   9  13    1.82    1.08
  -4   9   8    0.40    0.68
  -4  10  11   40.58    1.10
  -4  10  13   10.07    1.05
  -7   2  11  159.43    1.22
  -7   3  16    7.08    1.01
  -7   5  14    6.38    0.98
  -6   4  18   87.85    1.46
  -6   7  15   15.60    1.22
  -5   0  19    1.17    0.80
  -5   5  19    2.12    0.87
  -5   8   9   79.58    0.97
  -4  10  12   12.50    0.96
  -7   1  15   26.30    0.98
  -6  -2  11   12.62    0.52
  -4   1  20   11.97    0.78
  -7   1  13   54.66    0.96
  -7   2  12   19.06    0.78
  -7   3  12  418.18    1.90
  -7   4  14    3.67    0.93
  -6   5  17   43.17    1.34
  -6   6  16    6.99    1.17
  -6   7  13  264.25    1.84
  -5  -1  18   18.68    0.96
  -5   1  19   21.53    1.05
  -5   6  18    1.47    0.88
  -5   7   8  187.80    1.16
  -5   7  17   18.40    1.12
  -4   2  20   42.32    0.92
  -4   6  19    6.27    0.88
  -4   8   7   35.53    0.68
  -3   9  17    8.95    0.92
  -3  10  15    2.61    1.00
  -7   3  14   27.86    0.99
  -6  -2  13  109.98    1.07
  -6  -1  16    8.20    0.86
  -6   5   9  168.19    1.12
  -6   6  10   43.32    0.84
  -5   2  19   41.01    1.19
  -4   9   9    7.65    0.74
  -6   6  15   41.36    1.32
  -4   7  18   35.48    1.04
  -4   9  15   39.13    1.13
  -2  10  16    6.49    0.78
  -6  -1  15   31.17    0.95
  -6   3  17   34.25    1.28
  -6   5  16   80.51    1.48
  -5   8  11   25.02    0.87
  -4   5  19    2.96    0.87
  -3  10   9   20.15    0.79
  -3  10  14    2.89    0.99
  -6   0  16  192.49    1.63
  -6   4   9  117.14    0.93
  -6   6  12  104.41    1.22
  -6   6  14    8.92    0.98
  -5   7   9    0.75    0.62
  -5   7  16   86.30    1.35
  -5   8  12   52.90    1.07
  -4   9  10  157.57    1.35
  -4   9  14    1.58    1.08
  -6  -1  14   30.46    0.89
  -6   3   9  285.72    1.28
  -6   6  13  139.15    1.41
  -3   9  16   10.45    0.96
  -3  10  10   -1.08    0.81
  -1  11  14   65.94    1.16
  -6  -1  12  176.72    1.14
  -6  -1  13  580.01    2.07
  -6   0  10  156.49    0.97
  -5  -1  17    8.68    0.87
  -5   6   8   87.03    0.81
  -4   4  19    1.14    0.84
  -4   8   8  134.90    1.01
  -4   9  11   66.88    1.05
  -4   9  12   43.19    1.13
  -4   9  13   81.19    1.24
  -3  10  12   25.88    1.08
  -2  10  15    4.14    0.95
  -6   4  10   14.64    0.60
  -6   5  11  123.11    1.13
  -6   5  14    2.67    0.91
  -4  -1  18   20.33    0.95
  -4   2  19   28.20    1.06
  -3   7  18   15.95    0.88
  -6   5  13   20.22    0.92
  -5   5  17   15.47    1.06
  -5   7  14    6.96    1.12
  -4   7   7   10.84    0.46
  -3   9  15  101.48    1.42
  -1  11  13    2.91    0.90
  -6   0  14  106.84    1.14
  -6   2  10   28.03    0.60
  -6   4  11   89.77    0.99
  -5  -2  15  146.36    1.28
  -5   0  17   13.04    0.92
  -4   5  18    6.29    0.87
  -6   0  12   72.78    0.84
  -6   4  12  162.37    1.35
  -5  -1  16  162.72    1.48
  -5   5   8   61.06    0.69
  -5   7  13   41.88    1.07
  -4   8   9   23.47    0.69
  -3   0  19  135.53    1.29
  -6   2  11    9.62    0.65
  -6   3  11  910.68    2.42
  -5   5  16  119.81    1.46
  -4   0  18   37.41    1.02
  -4   4  18  176.71    1.66
  -4   6  17    1.32    0.90
  -4   7  16   24.16    1.05
  -4   8  14    3.69    0.93
  -3   9  14   88.19    1.39
  -2   7  18    4.85    0.74
  -1  10  15    2.21    0.80
  -6   2  12   19.61    0.79
  -6   3  12    1.86    0.65
  -6   3  13   44.68    0.93
  -5  -2  14   65.75    0.91
  -4   8  10   12.01    0.71
  -4   8  13   40.31    1.14
  -3   1  19    0.11    0.75
  -3   2  19   26.06    0.96
  -3   7  17    1.94    0.82
  -3   9   9    2.58    0.68
  -2   5  19   20.32    0.86
  -5  -2  13  205.42    1.27
  -4   2  18   55.03    1.23
  -4   7   8   18.27    0.60
  -4   8  12   66.91    1.19
  -5  -1  15    3.29    0.69
  -5   4  16    5.95    0.97
  -5   5   9    7.81    0.48
  -5   6  11   29.02    0.79
  -5   6  13   26.03    0.95
  -4  -2  16   43.60    0.99
  -4   5  17   89.83    1.31
  -3   8   7  164.21    0.99
  -3   9  10    3.27    0.74
  -2  10  10  504.78    2.10
  -2  10  11   42.95    1.06
  -1   9  16    1.79    0.81
  -5   3  16   13.40    0.97
  -5   6  12   17.40    0.83
  -4   6  16   74.47    1.27
  -3   5  18    8.82    0.86
  -3   9  11   64.44    1.01
  -3   9  12  129.74    1.33
  -2   4  19   -1.24    0.69
  -1  10  14    1.42    0.87
   0  10  15    0.75    0.73
  -4   7  14    0.29    1.06
  -2   1  19   91.18    1.15
  -2   6  18    4.22    0.80
  -3   4  18    0.56    0.81
  -2   2  19   16.44    0.81
  -5  -1  13   48.02    0.83
  -5   3  15   21.54    0.99
  -5   5  11   14.13    0.67
  -5   5  13  164.32    1.39
  -4   1  17    8.51    1.05
  -4   5  16    0.02    1.08
  -3   8   8   19.27    0.62
  -3   8  14  120.40    1.39
  -2   9  14    1.25    0.86
  -1   0  19  103.75    1.10
  -1  10  13  130.20    1.44
  -5  -1  11  195.23    1.05
  -5   5  12   57.60    0.94
  -4  -1  16   54.20    1.02
  -4   6   8  381.10    1.42
  -3   1  18   30.51    0.99
  -2   5  18   -0.27    0.85
  -1   6  18   14.77    0.87
  -1   9  15    1.04    0.92
  -4   7  11    6.79    0.71
  -3   5  17   10.36    0.91
  -2  -1  18   12.14    0.85
  -1   1  19    9.18    0.71
   0  10  14    2.49    0.81
  -5   2  14   67.15    1.13
  -5   3  14   95.31    1.17
  -5   4  13    4.64    0.75
  -4   4  16   10.71    0.96
  -4   6  14    8.45    0.90
  -3  -1  17   86.60    1.22
  -3   6  16    0.54    1.06
  -3   8   9   98.67    0.98
  -1   2  19    1.40    0.66
  -1  10  12   17.10    0.92
  -4   0  16  128.75    1.32
  -3   8  10  160.66    1.25
  -2   4  18   18.42    0.90
  -5   1  10   17.95    0.49
  -5   2  10    2.06    0.42
  -5   2  13  205.55    1.36
  -5   3  12   27.75    0.82
  -4   1  16   52.69    1.15
  -4   3  16    9.37    0.92
  -4   6  13   36.73    0.97
  -3   4  17  226.98    1.72
  -3   8  11   10.45    0.73
  -2   0  18   30.93    0.93
  -2   9   9   17.79    0.73
  -1   5  18    2.35    0.80
  -3   0  17    1.05    0.81
  -2   9  11  297.18    1.68
   0   9  15    5.13    0.83
  -4   4  15   46.91    1.08
  -4   5  14   -0.63    0.83
  -4   6  11  157.51    1.19
  -4   6  12  437.78    1.93
  -3   3  17    2.51    0.87
  -2   8  14    6.95    0.88
   0   7  17   35.66    0.91
  -3   7   8  927.13    2.18
  -1   4  18    0.98    0.81
  -1   6  17   44.08    1.08
   2  10  14    0.49    0.73
  -4  -1  14    2.04    0.69
  -4   3  15   29.37    0.97
  -2  -1  17    1.38    0.85
  -2   6  16  125.97    1.42
  -2   8   7   66.15    0.73
   0   5  18    6.53    0.71
   1   9  15   37.41    0.97
  -4  -2  11    2.33    0.45
  -4   4  14  197.39    1.50
  -3   4  16    2.47    0.89
  -2   4  17   10.62    1.03
  -2   8  13   16.17    0.90
   1   7  17    0.35    0.63
   1   8  16    0.17    0.73
  -4   5  10   13.47    0.56
  -4   5  11  257.85    1.43
  -4   5  12  177.51    1.29
  -3   5  15   32.42    1.16
  -3   7   9   16.28    0.56
  -1   1  18   72.05    1.09
  -1   2  18   38.12    0.96
   0  10  11    1.71    0.89
  -4   0  14   65.13    0.94
  -4   3  14   33.10    0.92
  -4   4  13    5.94    0.86
  -3   3  16   23.87    0.97
  -3   7  10    6.91    0.59
  -3   7  11    2.18    0.67
  -2   3  17   85.36    1.32
  -2   8   8  168.77    1.05
  -1   9  12  481.21    2.18
   0   4  18   33.10    0.83
   0   6  17    0.18    0.78
   2   9  15   21.23    0.76
  -4   1  14    1.80    0.70
  -4   2  14  145.65    1.28
  -3   1  16   26.99    0.93
  -2   1  17    1.67    0.95
  -2   5  16   18.48    0.96
  -2   7  14    3.28    0.88
   0   7  16    2.48    0.89
   0   8  15    4.48    0.84
  -4   4  12   98.49    1.02
  -3  -1  15   20.51    0.86
  -2   6  15   88.43    1.26
  -2   8   9    6.97    0.63
  -2   8  10   10.62    0.74
  -1   9  11    1.30    0.71
   0   1  18    0.37    0.77
   1  -1  18   15.55    0.70
   2  10  13    4.79    0.83
  -4  -1  11   31.50    0.58
  -4   4  10   77.84    0.77
  -4   4  11   13.11    0.59
  -3  -2  14   48.47    0.89
  -1   4  17   46.31    1.02
  -1   7  15    4.19    0.87
   0   2  18    3.80    0.72
   1   6  17    4.03    0.73
   1   9  14   59.12    1.06
  -4   2  13  505.11    1.95
  -4   3  12    3.60    0.70
  -2  -1  16    9.06    0.90
  -2   4  16   11.58    0.93
   0   5  17    6.52    0.79
   3  10  13    9.79    0.76
  -3   0  15  110.02    1.18
  -3   3  15   13.48    0.89
  -3   6  11  138.47    1.19
  -1   0  17    1.67    0.88
  -1   3  17    9.81    0.98
  -1   8  13    1.45    0.82
   1   1  18   42.86    0.87
   1   2  18    3.78    0.70
   1   7  16    5.90    0.81
   1   8  15    4.27    0.83
   2   6  17    0.76    0.63
  -3   1  15   21.08    0.88
  -3   2  15   33.92    0.98
  -3   5  13   90.48    1.12
  -2   3  16    0.11    0.85
  -2   5  15   21.04    0.98
  -1   1  17   36.55    1.05
   2   9  14   19.69    0.85
   4  10  13    6.31    0.66
  -4   2  10  118.31    0.83
  -4   2  11    7.39    0.51
  -2  -2  15    1.59    0.75
  -2   0  16   37.94    0.96
  -2   1  16    7.92    0.94
  -1  -2  16   36.40    0.92
   0   4  17    7.45    0.79
   0   6  16    2.20    0.81
   1   5  17    8.14    0.78
   1   9  13    9.57    0.98
   2   7  16   -0.39    0.70
   2   8  15    4.64    0.80
  -1   8  12   23.06    0.89
   3   9  14    2.85    0.76
  -3   5  12   81.72    1.00
  -2   4  15    1.07    0.86
  -2   7   8    6.33    0.45
  -1   4  16    2.80    1.02
   0   3  17   10.22    0.92
   2   5  17    0.35    0.67
   3   8  15    2.24    0.75
  -3  -2  12   55.27    0.72
  -3   1  14    6.57    0.73
  -3   2  14   32.29    0.89
  -3   5  11   83.04    0.91
  -2   7  10   34.91    0.73
  -1   8   7  516.84    1.60
   0   8  13    2.66    0.96
  -3   5  10  121.25    0.94
   0   1  17   26.39    0.92
   1  -1  17   13.85    0.81
  -3   3  13   29.34    0.82
  -2   3  15   32.58    0.98
  -1   3  16    3.49    0.85
  -1   5  15    5.84    0.90
  -1   6  14   71.09    1.29
  -1   8  10  583.37    2.07
   1   3  17    2.48    0.82
   2   4  17   -0.25    0.73
   2   6  16   34.32    0.97
  -2  -2  14    5.35    0.65
  -2   1  15   83.19    1.21
  -2   2  15    0.91    0.83
  -1   1  16   10.69    0.98
   0  -2  16   22.68    0.87
   1   0  17    2.98    0.81
  -3  -1  12   84.64    0.85
  -3   2  13  109.74    1.08
  -3   4  11  106.94    0.95
  -1  -2  15    7.06    0.79
   0   4  16  157.57    1.46
   1   1  17   12.63    0.87
   2   7  15   63.02    1.07
   2   8  14   21.24    0.91
   3   6  16   21.26    0.79
   3   9  13   21.14    0.92
  -3   4  10   16.41    0.53
  -2   6  11    8.64    0.67
  -1   4  15   31.74    1.02
  -2   3  14    5.61    0.94
   2   9  12   -0.11    0.92
   3   3  17   18.21    0.72
   3   8  14   13.27    0.91
  -3  -1  11    0.84    0.39
  -3   3  11   31.20    0.64
   1  -2  16    4.65    0.76
   2   1  17   26.42    0.83
   2   5  16    3.91    0.76
   3   0  17  133.75    1.17
   4  10  11    5.47    0.83
  -3   3  10  211.17    1.11
  -2   0  14    1.94    0.67
  -2   2  14    5.88    0.77
  -2   4  13   32.66    0.88
  -1  -1  15    3.87    0.70
  -1   3  15   14.36    0.90
   0   0  16    0.54    0.75
   0   1  16   27.82    1.03
   1   9  10  132.06    1.27
   3   1  17   21.15    0.80
   4   8  14    5.70    0.73
  -3   2  11  325.75    1.37
  -1   0  15   31.78    1.02
  -1   2  15   12.68    1.02
   2   8  13    1.13    0.92
   3   5  16    9.79    0.77
  -3   2  10    3.64    0.48
  -2   5  11  140.14    1.10
  -1   1  15    2.87    0.78
   0   8  10   23.16    0.77
   1  -1  16    3.08    0.84
   2   4  16   54.28    1.10
   3   9  12    2.71    0.80
  -2  -1  13   17.42    0.65
  -1  -2  14  115.63    1.15
  -1   4  14    4.16    0.83
  -1   7   8   85.40    0.77
  -1   7   9   19.71    0.58
   0  -2  15    4.36    0.71
   1   5  15   36.58    1.02
   2  -2  16   30.88    0.88
  -2   2  13   90.00    1.12
  -2   5  10   51.07    0.70
  -1  -3  13    6.96    0.63
   0   8   7   39.69    0.64
   0   8   9   33.24    0.72
   1   1  16    2.23    0.89
   3   4  16    0.80    0.80
   3   6  15   16.65    0.84
   3   8  13   54.14    1.13
  -2   5   9  112.31    0.84
  -1   3  14    8.95    0.95
   0   3  15   20.20    0.94
   0   6  13   82.96    1.18
   0   8   8   30.19    0.61
   1   6  14    0.64    0.85
   3  -2  16   19.29    0.78
   4   4  16    1.52    0.73
   4   6  15    0.72    0.73
   5   6  15    1.63    0.69
  -2   4  11   46.86    0.83
  -1  -1  14   29.78    0.80
   0  -1  15   13.99    0.78
   2   5  15  110.36    1.39
   5   9  12    5.99    0.75
   6   9  12   13.35    0.76
  -2  -1  12    4.51    0.57
  -2   3  12  106.89    1.03
  -1   2  14  115.39    1.24
   0   7  11  660.48    2.34
   2   0  16    0.51    0.82
   2   8  12   19.17    0.90
   3   9  11   22.97    0.91
   4   8  13    9.50    0.86
  -2  -2  11   19.86    0.53
   1  -2  15   43.71    0.99
   2   1  16   56.81    1.00
   4   3  16    9.24    0.73
   6   8  13    0.07    0.63
  -2   0  12  700.91    2.08
  -2   2  12    3.78    0.60
  -2   4  10  325.47    1.38
  -1  -2  13  135.03    1.13
   3   5  15    1.88    0.78
   4  -1  16   -0.14    0.67
  -2   4   9   69.65    0.68
   0  -2  14   19.28    0.84
   2   4  15    2.99    0.84
   3   8  12   64.46    1.21
   4   0  16  122.83    1.21
   4   9  11   38.02    1.06
   5   5  15    1.76    0.74
  -1   6   8  189.20    1.01
   1  -1  15    4.42    0.74
   4   1  16   -0.32    0.69
   5   1  16   50.75    0.85
 -18  -3   9    3.67    0.80
 -17  -2  10   11.24    0.89
 -16  -3  10    1.87    1.01
 -12 -10   1    9.33    1.23
 -12  -8   6   64.52    1.40
 -12  -3  10    4.16    0.91
 -16  -6   8   15.54    1.05
 -15  -9   3   10.18    1.02
 -13 -10   0    9.00    1.13
 -11  -8   6   13.84    1.10
 -10  -4   9   11.71    0.78
  -9  -5   8   11.08    0.74
  -9  -3   9  117.49    1.10
  -8 -10   0  159.42    1.56
  -7  -6   6   52.85    0.81
 -16  -8   5    1.54    0.92
 -16  -7   7    5.86    1.12
 -15  -8   6    1.88    1.18
 -14  -4  10  256.83    2.00
 -12 -10   2  149.55    1.94
 -11 -10   2    4.60    1.12
 -10 -10   2   99.60    1.60
 -10  -1  10  178.94    1.21
  -6  -9   1  214.59    1.37
  -6  -8   3   32.00    0.72
 -17  -3  10    9.63    0.92
 -15  -4  10    2.63    0.96
 -13 -10   2   16.72    1.31
 -13  -9   5   12.67    1.35
 -13  -4  10    4.56    0.93
 -12  -9   5  128.99    1.67
 -11  -3  10   13.74    0.87
 -10  -8   6  175.98    1.65
 -10  -6   8  102.56    1.29
  -8  -7   6   28.53    0.86
  -5  -8   2   45.12    0.75
 -18  -2  10    7.79    0.75
 -17  -6   8    4.25    0.98
 -16  -4  10   52.90    1.31
 -14  -7   8   38.94    1.45
 -11  -9   5   -0.70    1.05
  -9 -10   2   42.60    1.25
  -8 -10   1    6.15    1.01
  -8  -8   5  133.24    1.31
  -7  -5   7  211.51    1.27
 -17  -5   9   85.76    1.34
 -15  -2  11   52.44    1.11
 -14 -10   1    0.62    0.99
 -14  -9   5   32.35    1.21
 -14  -6   9   -0.16    1.05
 -14  -2  11    4.95    0.85
 -13  -8   7   33.56    1.31
 -13  -6   9  101.51    1.50
 -12 -10   3   47.28    1.35
 -12  -4  10    7.26    0.88
  -8  -2   9    1.58    0.44
  -7 -10   0    1.04    0.87
 -17  -7   7    4.20    0.90
 -16  -2  11   35.92    1.06
 -15  -7   8   52.14    1.29
 -15  -6   9  130.43    1.60
 -14  -8   7   36.25    1.26
 -13  -2  11   38.64    0.98
 -12  -8   7   32.68    1.25
 -12  -6   9   25.91    1.12
 -10  -9   5  112.17    1.49
  -9  -8   6    3.05    1.04
  -9  -7   7  129.39    1.36
  -7  -9   3  154.94    1.39
 -18  -3  10   16.41    0.83
 -17  -4  10   20.52    0.99
 -16  -6   9    0.87    1.08
 -15  -9   5    5.06    1.05
 -15  -8   7   13.30    1.23
 -15  -5  10   54.62    1.39
 -14  -5  10   22.57    1.10
 -11  -8   7   46.46    1.42
 -11  -7   8   71.16    1.32
 -11  -4  10   27.60    1.03
  -8  -9   4   15.65    0.91
  -8  -5   8   30.27    0.76
  -6  -9   2    4.45    0.63
 -16  -7   8    8.36    1.03
 -15  -3  11   35.32    1.08
 -14 -10   3   34.91    1.23
 -14  -3  11  107.80    1.35
 -13  -5  10   45.50    1.20
 -12  -2  11   38.43    0.98
 -10  -3  10   55.56    0.91
  -9  -6   8   53.72    1.05
  -8 -10   2    7.39    0.87
  -8  -3   9  139.41    1.08
  -7 -10   1   13.05    0.91
  -6  -7   5  163.28    1.16
 -16  -5  10    9.06    1.00
 -16  -3  11   12.03    0.93
 -14  -9   6    1.85    1.04
 -13 -10   4    3.49    1.22
 -13  -3  11    4.15    0.81
 -12 -10   4    3.11    1.09
 -11 -10   4    1.90    1.05
 -11  -6   9   43.36    1.14
  -9 -10   3   45.85    1.17
  -7  -7   6  180.20    1.31
  -5  -9   1  272.78    1.45
 -16  -9   5    4.42    0.93
 -11  -9   6   22.31    1.17
 -10  -8   7   23.49    1.08
  -7  -8   5   25.08    0.81
  -7  -6   7   35.90    0.85
  -5  -8   3  153.82    1.12
 -18  -4  10   21.07    0.86
 -17  -7   8   23.99    0.98
 -17  -5  10   14.35    1.06
 -17  -3  11   14.17    0.91
 -15  -9   6    3.39    1.04
 -15  -4  11  178.06    1.74
 -14 -10   4    6.22    1.08
 -14  -7   9   10.69    1.11
 -14  -4  11   17.27    1.14
 -13  -8   8   41.33    1.46
 -13  -7   9   10.73    1.30
 -12  -3  11   46.59    0.98
 -10 -10   4  127.81    1.56
  -9  -2  10  245.44    1.33
  -8  -8   6  183.51    1.50
  -8  -7   7  129.30    1.27
  -6 -10   0  207.51    1.51
 -15 -10   3    6.65    0.86
 -15  -7   9    6.33    1.03
 -14  -8   8   53.22    1.32
 -12  -8   8   37.64    1.44
 -11 -11   1   55.27    1.46
 -11  -2  11  110.77    1.17
 -10  -9   6   12.51    1.06
 -10  -6   9   19.07    0.95
 -10  -4  10   80.59    1.08
  -8 -10   3   31.39    1.12
  -6  -5   7   13.20    0.63
 -15  -8   8   11.83    1.03
 -13  -9   7   11.31    1.32
 -12  -7   9   38.64    1.24
  -9 -10   4  189.53    1.79
  -8  -6   8   46.72    0.91
  -8  -4   9    1.14    0.56
 -16  -9   6    2.74    0.86
 -15 -10   4    0.52    0.87
 -14  -9   7    7.27    1.05
 -13 -11   1    2.01    1.04
 -12 -11   2    5.81    1.31
 -12  -9   7   22.07    1.20
 -11 -11   2  208.10    2.06
 -11  -8   8   55.94    1.46
 -10 -11   2    0.56    1.26
  -9 -11   1  105.70    1.63
  -9  -8   7    9.19    0.94
  -9  -7   8    7.09    0.88
  -9  -3  10   84.84    0.95
 -13 -11   2   32.88    1.26
 -12  -4  11    3.35    0.85
 -11  -7   9   -0.32    0.99
 -11  -3  11   71.34    1.04
 -15  -9   7    3.36    0.97
 -15  -5  11   18.26    1.05
 -14  -5  11   96.03    1.40
 -11 -11   3    5.73    1.27
 -11  -9   7   96.47    1.50
 -17  -7   9    5.72    0.82
 -17  -6  10    7.20    0.88
 -15 -10   5    2.54    0.89
 -13 -11   3    7.68    1.13
 -13 -10   6   24.04    1.33
 -13  -5  11   10.47    0.98
 -12 -10   6   32.10    1.42
 -11  -6  10    5.19    1.14
 -10  -8   8  138.14    1.60
  -9 -11   2   11.06    1.10
  -9  -6   9  145.64    1.38
  -8 -11   1  264.70    1.99
  -8 -10   4   88.90    1.38
  -7 -10   3    5.55    0.91
  -7  -8   6   10.93    0.78
  -7  -3   9  193.47    1.16
  -6  -7   6  400.50    1.75
  -5  -7   5   15.14    0.58
 -16  -9   7   13.06    0.91
 -15  -3  12    5.66    0.86
 -14 -10   6   66.18    1.44
 -14  -8   9  126.28    1.61
 -14  -7  10   11.13    1.25
 -14  -3  12  133.33    1.48
 -13  -8   9    7.39    1.11
 -13  -2  12    1.60    0.75
 -11  -4  11   14.61    0.86
 -10  -7   9    1.16    1.10
  -7  -7   7   90.65    1.07
 -15  -8   9    8.75    0.98
 -15  -7  10    6.13    0.97
 -13  -9   8   12.50    1.31
 -13  -7  10   59.38    1.34
 -12 -11   4    0.45    1.23
 -12  -8   9   10.33    1.31
 -11 -10   6    5.01    1.10
  -9 -10   5   77.06    1.32
  -8  -2  10    8.10    0.49
  -6 -10   2  408.98    1.93
  -6  -9   4  102.91    1.10
 -16  -7  10    2.40    1.00
 -13 -11   4    4.94    1.09
 -13  -3  12    2.38    0.84
 -12  -9   8   16.31    1.17
 -11 -11   4   35.74    1.25
  -9 -11   3    1.30    1.10
  -8 -11   2    3.12    1.07
  -8  -9   6    3.04    0.89
  -8  -7   8    6.72    0.81
  -7  -6   8   38.64    0.82
 -17  -3  12   70.17    1.07
 -16  -8   9    7.37    0.92
 -15  -9   8    1.07    0.96
 -15  -6  11   14.94    1.03
 -15  -4  12   18.32    0.99
 -14  -4  12    1.50    0.98
 -12  -2  12   20.32    0.82
 -10 -11   4    0.84    1.22
 -10  -6  10   70.79    1.33
  -9  -8   8  175.68    1.73
  -8  -3  10   29.39    0.71
 -16  -6  11    1.60    0.90
 -16  -4  12    9.23    0.90
 -14 -11   4    3.17    0.91
 -13 -10   7   20.23    1.13
 -13  -6  11  130.89    1.57
 -11  -9   8    5.74    1.10
 -11  -8   9   20.12    1.14
 -11  -5  11   23.02    0.97
  -9  -9   7   54.07    1.22
  -5 -10   1  138.72    1.22
 -16  -9   8   11.56    0.92
 -14 -10   7   15.80    1.09
 -13 -11   5   26.02    1.29
 -13  -4  12   12.01    0.89
 -12 -11   5   65.81    1.38
 -12 -10   7  100.59    1.54
 -11  -7  10   63.10    1.30
  -9  -7   9   10.88    0.93
  -8  -6   9   16.13    0.81
  -7 -10   4   39.80    0.99
 -17  -6  11    7.09    0.89
 -15 -10   7   39.95    1.16
 -14 -11   5    2.15    1.05
 -11 -11   5   -0.45    1.02
 -11 -10   7    3.71    1.07
  -9 -11   4   43.62    1.33
  -9  -2  11  161.21    1.19
  -8 -11   3   18.24    0.98
  -8  -4  10    6.04    0.69
  -6 -10   3   12.92    0.78
 -15  -8  10    1.25    1.06
 -15  -5  12   21.88    1.03
 -14  -9   9    2.21    1.14
 -14  -8  10   20.50    1.10
 -14  -5  12   33.38    1.07
 -13  -8  10    3.81    1.24
 -12  -4  12    0.43    0.94
 -11  -2  12   23.17    0.84
 -10  -9   8  112.78    1.53
 -10  -8   9   67.18    1.32
  -7  -8   7   62.34    1.05
  -6  -8   6  103.56    1.11
  -5  -8   5  159.33    1.24
  -4  -9   2    5.86    0.52
 -13  -9   9   21.31    1.15
 -13  -5  12   33.00    1.23
 -11 -12   2    5.03    1.30
  -9  -3  11   30.99    0.81
  -7  -9   6  205.12    1.58
 -17  -5  12    6.59    0.87
 -13 -11   6   51.03    1.32
 -12 -12   2   56.84    1.40
 -12 -11   6   21.40    1.15
 -12  -9   9   69.03    1.41
 -12  -8  10   77.10    1.43
 -11  -3  12   19.20    0.80
 -10 -10   7    2.21    1.05
 -10  -7  10    3.09    0.96
 -10  -5  11    6.09    0.83
  -8  -9   7   15.87    0.99
  -8  -8   8   79.44    1.23
  -7  -7   8   21.71    0.85
  -6 -11   1    5.51    0.90
  -5  -9   4  198.64    1.38
 -16  -9   9    0.95    0.91
 -14 -10   8   13.21    1.07
 -13 -10   8    4.85    1.02
 -12 -12   3    2.07    1.13
 -12 -10   8    3.16    1.26
 -11 -12   3   16.81    1.34
  -7 -10   5    6.28    1.00
 -15  -6  12    2.45    1.06
 -14  -6  12   29.77    1.22
 -14  -3  13   10.94    0.93
 -13 -12   3   66.82    1.31
 -12  -7  11  153.32    1.69
 -12  -5  12   37.26    1.09
 -11  -9   9    1.84    1.08
 -11  -8  10   -1.29    1.23
 -11  -4  12   19.03    0.95
  -9 -12   2    4.38    1.21
  -9  -9   8  469.63    2.47
  -9  -8   9  113.41    1.57
  -7 -11   3    0.91    0.82
  -6 -10   4  354.35    1.93
 -11 -10   8    2.74    1.08
 -10 -11   6   30.97    1.36
  -9 -10   7    5.02    1.20
  -7  -3  10   98.46    0.93
 -16  -4  13    7.89    0.86
 -15  -4  13    3.17    0.90
 -13 -12   4    5.56    1.08
 -12 -12   4   12.36    1.13
 -11 -12   4    3.35    1.23
 -10  -2  12  502.17    2.01
  -6 -11   2   18.67    0.97
  -6  -4   9   80.84    0.82
  -4  -9   3  380.73    1.65
 -15  -8  11   17.43    1.08
 -14  -9  10    3.39    0.95
 -14  -8  11    2.15    0.95
 -14  -4  13    0.74    0.84
 -13  -9  10    4.54    1.21
 -11  -7  11    4.06    1.02
 -10  -9   9  171.83    1.76
 -10  -3  12   12.10    0.80
  -9  -7  10  188.59    1.64
  -9  -5  11   75.21    1.10
  -8 -12   2   38.03    1.27
  -4 -10   1   22.56    0.73
 -13 -10   9   54.26    1.40
 -13  -8  11   13.61    1.08
 -10 -12   4   40.60    1.28
 -10 -10   8    4.38    1.08
 -10  -8  10   30.80    1.17
  -8 -11   5   65.40    1.25
  -8  -6  10  329.43    1.86
  -8  -2  11   78.26    0.87
  -7  -9   7   25.89    0.98
  -7  -8   8   25.26    0.94
  -7  -4  10   73.26    0.86
  -6  -8   7    2.42    0.71
  -5  -8   6    6.04    0.64
 -16  -8  11    0.11    0.80
 -15 -10   9   26.60    1.07
 -14  -7  12   14.15    1.15
 -13 -12   5   14.00    1.07
 -12 -12   5    4.70    1.07
 -12 -10   9   14.50    1.29
 -12  -9  10    1.87    1.06
 -11 -12   5   60.56    1.47
  -9 -11   6   56.37    1.28
  -8  -9   8   40.89    1.14
  -8  -3  11  171.56    1.19
 -16  -5  13   10.57    0.90
 -14  -5  13   49.98    1.14
 -12  -8  11    3.87    1.04
  -9 -12   4    6.89    1.17
  -8 -10   7   18.27    1.06
  -8  -8   9    3.56    0.92
  -6 -11   3  307.89    1.84
  -6  -7   8  114.65    1.14
  -5  -7   7  206.94    1.32
 -13 -11   8    2.69    1.08
 -13  -7  12  161.92    1.68
 -13  -5  13    7.22    1.06
 -12  -4  13   23.26    1.05
 -11  -9  10   99.89    1.53
 -10 -12   5   25.14    1.30
  -9  -9   9  247.86    2.06
  -8  -4  11   60.85    0.97
  -7  -7   9   82.15    1.13
  -4 -10   2  262.81    1.48
  -4  -8   5    5.29    0.56
 -14 -11   8    4.11    0.92
 -12 -12   6   31.84    1.28
 -12 -11   8    3.71    1.01
 -11 -10   9   28.95    1.22
 -10  -5  12   10.49    0.97
  -5 -10   4   10.60    0.75
  -4  -9   4  248.82    1.41
  -3  -9   2   35.47    0.63
 -13 -12   6   -0.08    0.95
  -9  -8  10   77.91    1.34
  -9  -2  12  222.64    1.37
  -8 -11   6    1.92    0.97
 -14  -9  11    3.70    0.98
 -14  -6  13    9.36    0.97
 -11 -11   8   50.07    1.30
 -11  -3  13    8.19    0.83
  -9 -12   5  142.68    1.73
  -9  -3  12  252.28    1.53
  -8  -5  11   31.27    0.86
  -6  -6   9    9.30    0.67
  -5  -6   8   86.59    0.93
 -15 -10  10    2.97    0.91
 -13 -10  10   10.64    1.01
 -13  -9  11   13.28    1.08
 -10 -12   6  157.09    1.79
 -10 -10   9    1.89    1.08
 -10  -9  10    2.93    1.07
  -7  -9   8  366.05    2.10
  -6  -9   7   34.08    0.97
  -3  -8   4   95.26    0.88
 -13 -12   7   22.06    1.10
 -12 -10  10   11.95    1.09
 -12  -9  11  121.84    1.72
 -10 -11   8    3.70    1.27
 -10  -6  12    6.50    0.93
  -9  -7  11    3.08    0.93
  -7 -10   7   19.14    1.03
  -6  -8   8   63.91    1.06
  -6  -3  10   11.39    0.55
  -5  -9   6  220.27    1.50
  -4 -10   3  206.54    1.36
 -13 -11   9    0.29    1.00
 -12 -12   7   -0.19    1.00
  -8 -10   8  181.48    1.74
  -8  -9   9   78.05    1.35
  -5 -11   3  209.23    1.56
  -5  -4   9   44.68    0.71
  -3  -9   3    0.30    0.56
 -15  -7  13   10.97    0.93
 -14  -7  13    4.21    1.04
 -12 -13   4    1.38    1.01
 -12 -11   9   69.60    1.34
 -12  -8  12  151.46    1.80
 -12  -6  13   18.64    1.03
 -11 -13   4  106.70    1.59
 -11 -12   7   17.91    1.11
 -11 -10  10    1.43    1.26
  -9  -5  12   11.86    0.94
  -8 -12   5   76.71    1.45
  -8  -8  10  276.47    2.03
  -7 -11   6   17.30    1.20
  -7  -2  11  149.73    1.05
  -6 -12   2    8.12    1.03
  -5 -10   5   10.34    0.80
  -4  -8   6   49.69    0.90
  -3 -10   1   65.65    0.87
 -10 -13   4    1.64    1.18
  -9 -13   3   15.33    1.27
  -9 -12   6  142.11    1.63
  -9 -10   9   83.78    1.46
  -9  -9  10    5.40    1.06
  -7 -12   4   32.97    1.06
  -7  -3  11   94.16    0.91
  -6 -11   5   11.37    1.01
  -6  -7   9   47.20    0.95
 -15  -5  14    7.38    0.86
 -13  -7  13    5.22    0.93
 -13  -4  14    5.18    0.92
 -11 -11   9   61.68    1.34
 -10 -12   7   13.14    1.25
 -10  -3  13   57.92    1.02
  -7  -4  11  169.24    1.24
 -14  -9  12    1.36    0.99
 -10  -4  13    5.21    0.90
  -9  -8  11   83.72    1.52
  -6 -12   3   12.14    1.06
  -4 -10   4  109.19    1.18
 -13 -10  11   72.77    1.34
 -13  -5  14   24.45    1.08
 -12  -7  13   17.51    1.19
  -9 -13   4   29.77    1.30
  -8  -3  12  434.81    1.87
  -8  -2  12   58.32    0.85
  -6  -9   8   51.37    1.23
  -5 -11   4  688.53    2.60
 -14 -11  10   14.52    0.94
 -13 -11  10    1.86    0.97
 -12 -10  11    5.86    1.18
 -12  -4  14   23.22    0.99
 -10 -11   9  102.46    1.54
 -10  -5  13   33.01    1.08
  -8 -13   3   25.08    1.29
  -8 -12   6   47.54    1.22
  -8  -4  12  657.38    2.41
  -7 -12   5    4.56    1.10
  -7 -10   8   24.72    1.10
  -7  -9   9   10.96    1.00
  -6 -10   7   46.46    1.12
  -5  -9   7    0.93    0.77
  -3  -9   4   15.02    0.67
 -14  -6  14    1.08    0.87
 -12 -13   6   26.63    1.04
 -12 -11  10   20.34    1.06
 -11 -13   6   32.08    1.25
  -9 -12   7   86.45    1.44
  -8 -10   9  106.09    1.52
  -8  -9  10    5.37    1.22
  -6  -6  10   44.48    0.90
  -5  -6   9  162.25    1.23
 -12  -5  14   47.92    1.20
 -10  -8  12    4.03    1.22
  -8 -11   8    5.35    1.07
  -6 -12   4    6.59    1.01
  -6 -11   6   37.78    1.10
  -5 -12   2   -1.39    0.89
  -5  -8   8   15.62    0.81
 -11 -11  10    9.01    1.23
 -11 -10  11    4.96    1.06
 -10 -13   6    6.34    1.10
  -9 -10  10    2.55    1.09
  -8 -13   4    8.69    1.09
  -4 -11   3    9.79    0.83
  -4  -8   7   18.78    0.84
 -12 -13   7   63.94    1.28
 -12 -12   9    0.19    0.97
  -9 -11   9    3.02    1.08
  -9  -9  11    5.63    1.08
  -9  -3  13  103.16    1.17
  -8  -8  11   11.69    1.03
  -7 -13   3    2.08    1.12
  -5 -11   5   28.83    0.96
  -4 -10   5    9.17    0.74
  -3 -10   3  667.77    2.23
 -12  -6  14    3.95    1.06
  -8 -12   7   22.42    1.13
  -8  -6  12   20.95    1.08
  -5  -7   9    0.31    0.68
  -3  -6   7   65.17    0.78
 -13 -11  11   -0.53    0.95
 -13  -7  14    2.01    1.03
 -11 -12   9   15.92    1.06
 -10 -11  10    8.26    1.28
 -10 -10  11   28.19    1.21
  -6  -3  11  911.28    2.41
  -5 -12   3   24.58    0.97
  -5  -4  10   15.40    0.63
 -11  -5  14    3.99    0.90
 -10 -13   7   36.12    1.34
  -7 -13   4   10.56    1.17
  -7 -11   8   45.29    1.40
  -6  -9   9   28.44    1.05
  -6  -2  11   10.17    0.54
  -2  -9   3   94.28    0.93
 -12 -11  11    1.32    0.97
 -10 -12   9    2.99    1.18
  -8 -11   9    5.10    1.27
  -8 -10  10   27.78    1.21
  -5 -10   7   73.96    1.20
  -4 -11   4  247.66    1.64
  -2 -10   1   20.30    0.67
 -12 -13   8    6.09    0.90
  -7  -4  12   89.12    1.09
  -7  -3  12  563.87    2.03
  -5 -11   6    8.69    1.04
  -4  -5   9  400.73    1.66
  -3 -10   4  118.54    1.13
  -3  -7   7   31.13    0.77
 -14  -8  14    2.62    0.85
 -12 -12  10    3.04    0.95
 -11 -13   8   65.39    1.29
  -8 -13   6   10.04    1.19
  -8  -9  11   56.47    1.32
  -7 -12   7   32.61    1.29
  -7  -2  12   18.51    0.65
  -6 -13   3    0.47    1.05
  -6  -8  10  100.30    1.33
  -5  -8   9   80.98    1.16
 -15  -6  15   10.59    0.79
  -9 -13   7    1.28    1.06
  -9 -10  11  115.62    1.64
  -7 -13   5   48.80    1.33
  -6 -12   6    2.24    1.08
  -5  -6  10   44.61    0.88
  -4  -8   8  170.33    1.44
  -2 -10   2  303.96    1.51
 -11 -12  10   12.74    1.08
 -10 -14   5   14.33    1.13
 -10 -13   8    6.41    1.09
 -10  -5  14    1.51    0.82
  -9 -12   9    7.69    1.07
  -8  -3  13  138.40    1.24
  -4  -6   9    2.83    0.60
 -12  -8  14   66.51    1.37
 -11  -9  13    9.05    1.03
 -10 -11  11  106.46    1.67
  -8  -8  12   31.00    1.15
  -6 -13   4    4.08    1.11
  -4 -11   5   15.64    0.88
  -3 -11   3   12.08    0.80
  -2  -9   4   67.34    0.84
 -10 -12  10   34.28    1.32
  -8  -5  13   79.35    1.15
  -7 -10  10  338.41    2.26
  -6 -11   8    3.07    1.02
  -6 -10   9   60.68    1.29
  -5 -10   8   18.47    1.16
  -5  -7  10   20.54    0.86
  -4 -12   3   14.51    0.97
  -3  -8   7  164.29    1.32
  -3  -6   8  178.50    1.19
  -2  -7   6   29.82    0.63
 -12 -11  12    0.58    0.94
 -10 -14   6    2.12    1.03
  -9 -13   8   14.55    1.22
  -8 -13   7    7.70    1.03
  -7 -13   6    8.95    1.15
  -6  -9  10  316.04    2.09
  -6  -7  11   43.76    1.09
  -4  -7   9   99.17    1.11
 -13  -9  14   11.59    0.98
 -12 -12  11   29.79    1.05
 -12 -10  13    0.16    0.97
 -12  -6  15   17.57    1.05
  -8 -10  11    2.07    1.09
  -7  -9  11    2.78    1.04
  -6 -12   7    0.80    1.16
  -2 -10   3   73.37    0.89
  -6 -13   5    5.08    1.00
 -11  -5  15   10.14    0.98
  -9  -5  14    9.28    0.93
  -5  -8  10   82.48    1.36
  -5  -4  11  502.64    1.92
  -5  -3  11   18.60    0.64
  -4 -12   4  323.77    1.94
  -4 -11   6  179.72    1.58
  -3  -7   8  943.21    2.68
  -2  -9   5   15.36    0.76
 -12  -7  15  116.08    1.51
 -11 -10  13  124.97    1.55
 -10 -14   7   -0.29    0.88
  -8  -7  13  115.35    1.46
  -6  -8  11   35.20    1.12
  -6  -3  12    5.98    0.63
  -9  -6  14    1.46    0.89
  -7 -13   7   14.33    1.08
  -7  -8  12   16.40    1.07
  -6  -5  12   53.35    0.97
  -5 -13   4   38.20    1.23
  -3  -9   7   -0.51    0.73
 -13  -8  15   37.30    1.11
 -11 -13  10   57.46    1.21
 -10 -12  11   37.34    1.20
  -9 -14   7   96.79    1.50
  -9  -9  13  145.59    1.82
  -7 -11  10    3.19    1.11
  -7  -4  13   61.70    1.03
  -6 -13   6    3.68    0.99
  -6 -10  10   51.68    1.31
  -5 -11   8  163.25    1.80
  -5 -10   9   61.01    1.42
  -2 -11   2   -0.05    0.68
  -7 -14   5    4.64    1.15
  -7 -12   9   95.42    1.54
  -7 -10  11   19.14    1.19
  -4 -12   5   27.37    1.01
  -3 -11   5   71.08    1.21
  -3  -8   8   35.53    0.89
  -2  -7   7  117.77    1.04
 -12 -12  12    1.61    0.89
 -12  -8  15    1.27    0.95
 -11  -7  15    8.10    1.07
 -10 -14   8    2.39    0.90
 -10 -13  10   10.18    1.10
  -7  -6  13  257.18    1.88
  -5 -12   7   12.47    1.18
  -5  -7  11  160.60    1.58
  -4 -10   8   14.49    0.99
  -3 -12   3   39.58    1.06
 -12 -10  14    3.53    0.97
  -5 -13   5    4.86    0.98
  -4  -9   9   10.36    1.10
  -3  -6   9  281.71    1.53
  -9 -11  12   10.16    1.09
  -8 -14   7    2.15    1.07
  -8  -5  14   29.28    1.03
  -8  -4  14   27.82    0.91
  -7 -13   8   24.41    1.14
  -2 -11   3    5.03    0.66
  -1 -10   2  165.91    1.18
  -9 -14   8    0.16    0.96
  -7 -14   6   36.97    1.21
  -6 -13   7   54.58    1.29
  -4 -12   6  190.98    1.80
  -3 -10   7  187.34    1.58
  -3  -7   9   30.37    0.84
  -2  -8   7   55.60    0.91
  -1  -9   4   13.39    0.61
 -11 -13  11   -0.70    0.86
 -11 -10  14    7.54    1.07
 -11  -8  15   29.19    1.13
  -3 -12   4    5.08    0.83
  -3 -11   6  501.64    2.43
  -3  -9   8   43.63    1.03
  -2  -6   8  221.91    1.31
 -10 -14   9    0.11    0.86
 -10 -12  12   18.85    1.10
  -7 -12  10  145.13    1.73
  -7 -11  11   70.82    1.46
  -6 -14   5    5.99    1.13
  -6 -12   9    0.79    1.09
  -5 -13   6   10.48    1.03
  -4 -13   4   25.40    1.14
  -1 -10   3   30.96    0.77
  -1  -7   6  229.24    1.29
 -10 -13  11    6.66    1.06
  -8 -12  11   83.66    1.60
  -6 -10  11  285.62    2.17
  -5 -10  10    2.15    1.06
  -8 -14   8    9.92    1.06
  -7 -14   7   36.06    1.21
  -7 -10  12    0.14    1.10
  -5  -5  12  105.10    1.16
  -5  -4  12   25.37    0.75
  -4 -11   8   14.01    1.08
  -3  -8   9   99.41    1.22
  -2  -7   8    6.15    0.64
 -10  -8  15    1.57    1.00
  -9  -6  15    9.45    1.06
  -8 -13  10    3.44    1.00
  -6 -14   6   13.08    1.20
  -4 -13   5  430.10    2.41
  -4 -12   7   73.68    1.47
  -4  -3  11  452.50    1.75
  -3 -12   5   93.38    1.28
  -2  -9   7  147.66    1.34
  -1  -9   5  645.07    2.24
 -11 -12  13   17.44    1.03
  -6  -6  13  117.66    1.37
  -6  -3  13   45.85    0.92
  -5 -13   7   16.10    1.27
  -4  -9  10  132.18    1.53
  -1 -10   4  115.36    1.17
  -1  -8   6  285.59    1.52
  -9  -7  15    3.00    1.07
  -4  -7  11    5.49    0.87
  -3  -6  10   73.12    1.00
  -2 -11   5   25.52    0.92
  -1  -6   7   13.15    0.56
  -7 -14   8    7.08    1.19
  -7  -6  14  206.18    1.70
  -6  -7  13  282.98    1.99
  -3  -9   9    4.19    0.92
  -2 -12   3  207.51    1.59
  -1 -11   2  124.46    1.19
  -9 -10  14    4.30    1.15
  -7 -12  11   34.13    1.25
  -7 -11  12  103.30    1.73
  -6 -14   7   20.19    1.25
  -5 -12   9    4.42    1.11
  -5 -11  10   34.63    1.27
  -4 -13   6   94.92    1.53
  -3 -12   6   18.78    1.14
  -3  -7  10    8.09    0.81
  -1  -7   7    0.37    0.57
  -9 -14  10   16.87    1.06
  -7  -7  14  190.46    1.73
  -6 -10  12  139.59    1.86
  -5 -10  11   10.05    1.13
  -5  -8  12   40.09    1.18
  -4 -11   9   15.94    1.13
  -4  -8  11  128.70    1.49
  -2  -6   9    1.05    0.61
 -11  -8  16    2.14    0.88
  -8 -15   7  105.03    1.43
  -8 -12  12  153.97    1.70
  -8  -6  15    9.15    1.04
  -8  -5  15    4.21    0.86
  -5 -13   8    5.84    1.23
  -4 -10  10    3.27    1.06
  -2 -12   4  169.26    1.56
  -2 -11   6   59.23    1.26
  -2  -9   8   53.83    1.21
  -1 -11   3  112.90    1.14
  -1 -10   5   12.83    0.75
  -8 -11  13    2.42    1.02
  -7 -15   6   24.57    1.16
  -7 -10  13   11.53    1.14
  -5 -14   6   11.66    1.08
  -3 -11   8  132.79    1.71
  -3  -8  10  201.01    1.65
  -2  -7   9   94.53    1.12
  -8  -7  15   27.91    1.22
  -7  -8  14   14.18    1.08
  -5  -9  12    4.66    1.27
  -3 -10   9   12.47    1.05
   0  -9   4    6.27    0.66
  -9  -9  15    2.87    1.04
  -8 -14  10   32.29    1.15
  -6 -14   8    2.14    1.05
  -5  -5  13  144.01    1.43
  -4 -13   7  197.53    1.84
  -3 -13   5    8.85    1.10
  -3 -12   7   16.21    1.07
  -1 -11   4    5.22    0.74
 -10  -8  16   14.44    1.07
  -9 -11  14    2.47    1.02
  -8 -15   8   17.57    0.95
  -8 -10  14   38.00    1.21
  -7 -15   7   20.81    1.11
  -6 -12  11   34.19    1.27
  -5 -12  10   24.10    1.23
  -5  -6  13   43.37    1.07
  -5  -4  13    3.57    0.67
  -3  -9  10    6.83    1.18
  -9  -6  16    0.88    0.99
  -9  -5  16   32.21    1.08
  -8  -8  15    0.66    0.95
  -7 -13  11   -0.81    1.14
  -6 -11  12  118.81    1.66
  -6  -5  14   15.44    0.87
  -6  -4  14  174.20    1.50
  -5 -14   7   21.68    1.16
  -4 -14   5    9.06    1.13
  -4 -11  10    1.31    1.31
  -3  -4  11   92.59    1.03
  -2 -10   8  276.90    2.01
   0  -7   6  190.82    1.22
  -7 -11  13    2.95    1.25
  -6 -15   6   28.02    1.22
  -5 -13   9   19.11    1.16
  -5  -3  13    2.99    0.75
  -4  -3  12    1.76    0.62
  -3  -7  11    2.41    1.02
  -8 -12  13   12.61    1.07
  -6  -7  14   61.71    1.25
  -5 -10  12  121.56    1.67
  -4 -10  11   38.21    1.29
  -3 -13   6   24.16    1.09
  -2  -9   9   42.73    1.13
  -2  -6  10   38.49    0.98
  -1 -11   5   21.44    0.91
   0  -9   5   16.91    0.72
 -10  -9  16   10.66    0.99
  -7 -15   8    5.68    1.00
  -7 -14  10   16.36    1.07
  -7  -6  15    9.90    0.92
  -7  -5  15   59.24    1.15
  -6 -14   9    3.75    1.09
  -6 -10  13   13.14    1.16
  -5  -8  13  193.45    1.83
  -4 -13   8    4.81    1.05
  -3 -11   9    7.39    1.10
  -2 -12   6  164.05    1.62
  -2  -4  10  339.71    1.59
  -1 -12   3  131.06    1.37
  -1  -8   8   86.03    1.14
   0 -10   4   26.39    0.87
   0  -8   6   18.18    0.71
 -10 -11  15   16.51    0.96
  -9  -8  16    1.90    1.05
  -5 -14   8   10.87    1.20
  -3  -8  11    9.83    1.01
  -2 -13   4    6.88    1.03
  -2  -7  10   31.25    0.95
  -4  -2  12  232.86    1.33
   0 -11   2    1.18    0.74
   0  -6   7    6.17    0.55
  -7  -8  15   10.89    1.15
  -6 -12  12   77.84    1.45
  -5  -9  13    0.88    1.08
  -4  -9  12   47.64    1.32
  -2  -8  10    6.02    0.94
  -2  -3  10  231.43    1.25
  -1 -12   4    2.49    0.82
  -1 -11   6   74.92    1.22
  -8  -6  16   39.78    1.18
  -7 -13  12    8.01    1.12
  -7 -12  13   10.14    1.22
  -5 -15   6   66.93    1.39
  -5 -11  12  112.96    1.65
  -4 -12  10   32.04    1.29
  -4 -11  11   60.42    1.61
  -3  -9  11   44.00    1.27
  -3  -2  11  333.08    1.48
  -2 -12   7   27.01    1.26
  -2 -10   9   14.51    1.09
  -1  -9   8  151.48    1.50
  -1  -6   9   55.59    0.91
  -1  -5   9  221.85    1.35
   0 -11   3   24.88    0.87
   0 -10   5    3.88    0.72
   0  -7   7 1110.88    2.88
 -10 -10  16    8.81    0.87
  -9 -11  15    3.78    0.91
  -9  -9  16   18.19    1.04
  -6 -15   8    3.61    1.06
  -6 -14  10   35.25    1.30
  -6 -11  13    3.35    1.09
  -4 -13   9  270.21    2.13
  -4  -6  13   67.96    1.31
  -4  -5  13   14.24    0.96
  -3 -14   5  227.36    1.92
  -1  -7   9   35.86    0.92
   1  -9   3   22.48    0.70
   1  -8   4   31.91    0.68
  -5 -14   9   33.03    1.31
  -5  -6  14    5.29    0.93
  -5  -5  14  120.65    1.40
  -3 -11  10  603.85    2.96
  -3  -6  12   20.22    0.95
  -3  -5  12  122.81    1.26
  -2  -9  10   91.67    1.41
  -1 -12   5    4.83    0.88
  -8  -8  16   33.50    1.19
  -7  -9  15   65.66    1.34
  -5 -15   7    9.64    1.10
  -5 -10  13    1.60    1.12
  -5  -7  14    5.37    0.98
  -5  -4  14   32.90    1.01
  -3  -7  12  153.01    1.58
  -1  -8   9  239.42    1.72
 -10  -8  17   34.21    1.03
  -6 -10  14   60.47    1.37
  -6  -6  15   42.70    1.10
  -6  -5  15   71.45    1.28
  -4 -14   8   13.18    1.22
  -3 -14   6    4.02    1.17
  -3 -13   8  193.59    1.85
  -3 -10  11   45.06    1.33
  -2 -13   6    0.06    0.94
  -2  -5  11  152.27    1.36
  -1 -11   7  303.13    2.04
  -1 -10   8    2.34    0.98
   1  -9   4   33.91    0.83
  -9 -10  16   -0.47    0.94
  -6  -4  15   12.37    0.92
  -3  -8  12   66.24    1.33
  -2 -12   8   55.57    1.33
  -2 -11   9   22.24    1.19
  -2  -7  11   44.95    1.10
   0  -9   7   36.89    0.99
   0  -6   8    4.16    0.63
   1 -10   2    1.28    0.62
  -6 -15   9   44.20    1.20
  -6 -13  12    2.04    1.07
  -5 -13  11   15.12    1.10
  -5 -12  12    0.62    1.07
  -4 -12  11   27.40    1.26
  -3  -3  12   16.77    0.71
  -2 -10  10  495.90    2.65
  -2  -4  11   54.59    0.87
  -1 -12   6    5.37    0.97
  -1  -9   9   84.16    1.34
   0 -11   5   44.49    1.04
   0  -7   8    2.81    0.70
   0  -5   8   56.91    0.79
  -7  -6  16    5.09    1.01
  -6 -12  13   11.08    1.05
  -6  -8  15   64.76    1.31
  -5 -15   8    3.24    1.09
  -4 -15   6   11.70    1.15
  -4 -11  12   27.40    1.42
  -2  -8  11    4.49    1.02
  -1 -13   4  124.74    1.50
  -1  -6  10   25.52    0.98
   1 -10   3   13.98    0.66
   1  -6   6    1.58    0.54
  -7 -13  13   -0.45    0.95
  -7  -7  16   25.46    1.19
  -7  -5  16    9.45    0.90
  -5 -14  10    6.69    1.07
  -5  -9  14  110.01    1.60
  -3 -14   7   23.63    1.17
  -3  -9  12  153.29    1.75
  -2 -13   7   35.19    1.21
  -1  -7  10   31.38    1.00
   0 -12   3   12.69    0.92
   0  -8   8   28.04    0.94
   1  -9   5    7.02    0.71
  -4 -14   9   36.75    1.35
  -3 -11  11    4.42    1.17
  -2  -9  11  302.35    2.27
   1 -10   4   52.03    1.01
   1  -8   6    1.47    0.80
  -7  -8  16   62.46    1.29
  -4 -15   7   38.92    1.21
  -2 -14   5    9.87    1.02
  -1 -12   7   36.49    1.19
  -1 -10   9  136.02    1.63
  -1  -4  10   89.26    0.96
   0 -11   6    6.41    0.93
  -7 -11  15   -0.95    1.03
  -5 -10  14   61.90    1.55
  -4 -10  13    8.55    1.18
  -4  -6  14    4.28    1.08
  -3 -10  12   29.04    1.31
  -3  -6  13   23.54    1.14
  -3  -2  12   59.52    0.86
   0  -9   8   72.33    1.24
  -8  -6  17   47.65    1.15
  -5 -15   9    7.93    0.97
  -5 -13  12   25.70    1.28
  -5  -6  15   84.35    1.43
  -4  -5  14   -0.55    0.83
  -3 -14   8    0.40    1.09
  -2 -14   6   54.25    1.41
  -2 -13   8   41.27    1.39
  -1  -9  10  293.77    2.20
   0  -6   9   10.17    0.76
   1 -10   5   34.23    1.03
   1  -6   7  139.34    1.19
  -8  -7  17  147.19    1.48
  -5  -7  15    8.21    1.04
  -5  -5  15  105.13    1.44
  -4 -13  11   50.72    1.31
  -3  -8  13   67.30    1.56
  -2  -5  12   19.26    1.01
  -1 -13   6   14.58    1.17
  -1  -3  10  107.51    0.97
   0 -12   5   50.80    1.13
   0  -7   9    6.26    0.84
   0  -5   9   58.10    0.87
   1 -11   3    3.06    0.83
   1  -5   7   60.69    0.81
  -8  -8  17    0.84    0.95
  -6 -14  12   35.35    1.10
  -6 -12  14   35.09    1.29
  -5  -8  15   32.61    1.34
  -4 -15   8    0.59    1.10
  -4 -14  10   20.31    1.28
  -4  -4  14  193.36    1.51
  -3 -12  11   22.46    1.26
  -3  -4  13  278.90    1.70
  -2  -2  11   20.53    0.69
  -1 -11   9    0.38    1.30
  -6  -7  16   30.84    1.21
  -5  -4  15   93.40    1.28
  -4 -11  13    0.87    1.11
  -2  -8  12  815.63    3.24
  -2  -4  12  212.35    1.54
  -1 -12   8    3.88    1.09
  -7 -10  16    0.31    0.98
  -6  -5  16   90.63    1.27
  -3 -11  12    2.03    1.17
  -3  -9  13   17.64    1.22
  -2 -14   7    0.92    1.19
  -2 -12  10  318.59    2.44
  -1 -10  10   28.52    1.26
  -1  -7  11  135.93    1.50
  -1  -5  11   33.30    0.92
   0 -12   6    7.37    1.02
   1 -10   6   38.81    1.21
  -8  -9  17    5.68    0.93
  -6  -8  16   60.89    1.31
  -5 -15  10    1.13    0.99
  -3 -15   7   -1.14    1.08
  -3 -14   9  116.20    1.62
  -2 -13   9   78.47    1.59
  -2 -11  11    6.76    1.41
  -2  -9  12    4.83    1.16
  -1 -13   7   36.89    1.23
  -1  -8  11  618.50    2.81
   0  -9   9    9.77    1.06
   2  -7   5  103.95    1.00
  -4 -15   9   22.75    1.15
  -1  -4  11   16.87    0.81
   0 -13   4   19.05    1.10
   1 -11   5  109.03    1.34
   1  -6   8  168.25    1.38
   2  -9   4   19.37    0.83
  -7  -7  17   11.42    1.02
  -6  -9  16    4.35    1.11
  -4 -13  12    5.04    1.19
  -4 -10  14  209.06    1.96
  -3 -10  13   12.23    1.21
  -2  -3  12  109.71    1.13
  -1 -14   5   42.39    1.30
   0  -6  10  171.68    1.55
   1  -7   8   17.54    0.84
   2 -10   2   13.85    0.73
  -5 -14  12    2.46    1.01
  -4 -12  13   24.16    1.32
  -3 -13  11    2.41    1.23
  -2 -14   8  110.92    1.67
  -2 -10  12   30.95    1.32
  -1 -11  10  183.51    1.91
   0 -13   5   42.59    1.33
   0 -12   7    8.37    1.05
   0 -10   9    2.60    1.09
   0  -7  10   22.25    1.02
   1 -12   3   40.93    1.09
   1  -8   8   17.17    0.96
   1  -5   8  594.57    2.11
   2 -10   3   71.17    1.02
  -7  -8  17   90.94    1.33
  -5 -12  14    7.71    1.07
  -4  -7  15   77.76    1.47
  -3 -15   8  142.74    1.67
  -3 -12  12    1.02    1.10
  -3  -7  14    7.02    1.04
  -3  -6  14   48.01    1.18
  -2  -6  13   51.72    1.30
  -1 -13   8   37.39    1.40
   0  -8  10   29.21    1.15
   1 -12   4  134.13    1.51
   1 -11   6   35.39    1.10
   2  -9   5  219.04    1.58
   2  -6   6   67.33    0.88
  -4  -5  15   17.21    1.11
  -3 -14  10    1.00    1.06
  -3  -5  14   65.12    1.16
  -2 -15   6   -0.22    0.99
  -1 -14   6   13.74    1.12
  -1 -10  11   54.66    1.60
  -1  -3  11    8.79    0.71
   1  -4   8   16.24    0.62
   2 -10   4   54.91    1.09
  -7  -9  17   -0.11    0.91
  -6 -10  16   28.01    1.11
  -5  -7  16   95.31    1.49
  -5  -6  16   31.88    1.18
  -3 -11  13    5.50    1.13
  -2  -8  13    5.31    1.12
  -2  -5  13  144.10    1.45
   0 -13   6    3.31    1.12
   0  -9  10   19.81    1.18
   0  -4  10   52.69    0.88
   2  -8   6  116.27    1.22
  -5 -11  15   10.18    1.13
  -5  -8  16   11.22    1.16
  -5  -5  16  117.64    1.45
  -3  -9  14  109.62    1.61
  -3  -4  14    1.71    0.94
  -2 -11  12    8.02    1.19
  -1  -7  12  110.14    1.49
   0 -12   8   34.93    1.42
   0 -11   9  116.22    1.64
   1 -12   5    3.52    0.91
  -2 -15   7   40.02    1.27
  -2  -9  13  113.92    1.64
  -2  -4  13   32.38    1.03
  -1 -14   7   86.02    1.45
  -1  -8  12   25.07    1.21
  -1  -5  12  131.05    1.37
   1 -11   7   13.70    1.08
   1 -10   8    1.39    1.23
   1  -7   9   31.60    1.02
   1  -6   9    4.19    0.78
   2 -10   5   21.35    0.92
  -5  -9  16    9.24    1.20
  -4 -13  13   36.32    1.27
  -3 -15   9    0.33    0.92
  -1 -11  11   29.22    1.51
   0 -13   7  125.49    1.70
   0 -10  10   79.63    1.51
   1  -8   9    2.44    0.98
   2  -6   7   25.34    0.76
  -6  -6  17   34.81    1.05
  -4 -14  12    3.81    0.96
  -3 -13  12    8.86    1.14
  -1  -9  12  435.20    2.59
  -1  -4  12   37.86    1.05
   0  -6  11  277.98    1.87
   0  -3  10   25.84    0.70
   1 -12   6   16.97    1.08
   2 -11   4    0.92    0.93
  -6  -8  17    3.44    0.93
  -4 -12  14    6.98    1.13
  -4 -10  15   89.38    1.46
  -3 -12  13    5.48    1.08
  -2 -13  11   57.66    1.48
  -2 -10  13   15.36    1.22
  -1  -2  11   20.32    0.71
   1  -9   9   30.13    1.19
   2  -5   7    9.23    0.63
   3  -8   3  242.76    1.38
  -2 -15   8    0.32    1.03
  -2 -12  12   13.62    1.16
  -2  -3  13  342.20    1.85
  -1 -14   8   17.82    1.15
  -1 -10  12   15.07    1.43
   0  -9  11   86.08    1.68
   1 -13   4  163.74    1.65
   2  -9   7   17.92    1.02
  -6  -9  17    2.99    0.87
  -3  -7  15    7.82    1.21
  -2 -14  10    2.29    1.04
  -2  -7  14    0.38    1.19
   0 -11  10    0.48    1.15
   1 -12   7   13.73    1.26
   3  -9   3    1.43    0.72
   3  -8   4  228.29    1.42
  -3 -11  14   85.03    1.45
  -3  -8  15  179.89    1.87
  -3  -6  15   48.74    1.18
  -2 -11  13   23.51    1.39
  -2  -6  14   13.65    1.04
  -1 -12  11   22.26    1.42
  -1  -3  12   13.59    0.82
   0 -14   6    5.44    1.19
   0 -13   8    3.25    1.08
   0  -4  11    3.43    0.72
   1 -13   5    1.97    1.00
   1 -10   9   39.08    1.30
   1  -7  10   12.77    1.03
   1  -6  10    1.29    1.04
   2  -7   8   26.66    0.96
  -4  -8  16   15.97    1.18
  -4  -7  16   27.12    1.14
  -4  -6  16   71.21    1.38
  -3  -5  15   35.28    1.18
  -2  -5  14   63.21    1.28
  -1  -8  13    1.29    1.30
  -1  -6  13   99.03    1.41
   0 -10  11    2.43    1.18
   1  -8  10   25.90    1.18
   2 -11   6    0.07    1.09
   2  -8   8   82.49    1.30
   2  -6   8    3.94    0.77
   3  -9   4   28.94    0.86
   3  -6   5  263.66    1.42
  -4  -5  16   -0.91    0.98
  -2 -15   9   38.09    1.20
  -2  -9  14    0.27    1.09
  -1 -14   9   60.42    1.44
  -1 -11  12  132.41    1.74
  -1  -5  13    2.32    1.03
   0  -2  10  128.61    1.07
   1  -3   9   22.84    0.75
   2 -12   4   21.89    1.11
   2  -5   8  327.09    1.70
  -5  -7  17   19.40    1.05
  -4  -9  16   56.88    1.35
  -3 -13  13    1.63    1.00
   0 -14   7   10.93    1.25
   1 -12   8    8.77    1.32
   1 -11   9    5.62    1.37
   1  -9  10  128.82    1.66
   2  -9   8   21.31    1.12
   3 -10   2    0.59    0.64
   3 -10   3   25.71    0.81
   3  -9   5   94.73    1.21
  -5  -6  17   73.75    1.22
  -3  -4  15   46.01    1.15
  -2 -13  12    0.83    1.08
  -2  -4  14   53.99    1.09
   0 -13   9   14.19    1.29
   0 -12  10   42.74    1.39
   0  -8  12   61.78    1.40
   0  -3  11  118.32    1.20
   2 -12   5   47.55    1.15
   3 -10   4   80.25    1.16
   3  -8   6  102.08    1.34
   3  -6   6  170.54    1.35
  -4 -12  15   20.49    1.09
  -3 -12  14    1.56    1.01
  -3 -10  15    1.79    1.10
  -2 -10  14  151.36    1.74
  -1  -4  13   71.05    1.26
   0  -9  12   48.90    1.58
   0  -5  12  238.52    1.75
   1 -13   7    2.89    1.20
   1 -10  10   39.96    1.36
   1  -4  10    3.65    0.72
   2  -4   8  261.47    1.47
  -5  -9  17    0.52    0.86
  -1 -15   8   18.22    1.16
  -1 -13  11    5.43    1.09
  -1 -10  13  141.29    1.76
  -1  -2  12  231.73    1.48
   2 -12   6   19.27    1.26
   2  -8   9    4.87    1.05
   2  -7   9   10.38    1.00
   2  -6   9   52.10    1.09
   3 -10   5  280.70    1.85
   3  -5   6  300.17    1.53
  -2 -15  10   -0.28    0.94
  -1 -14  10    3.76    1.13
  -1 -12  12    7.50    1.10
   0 -14   8   31.45    1.21
   1  -8  11  206.75    1.91
   1  -6  11  389.72    2.21
   3 -11   3   32.60    1.07
  -3 -11  15    4.37    1.07
  -2 -11  14    0.59    1.18
  -2  -3  14    8.21    0.92
   0 -10  12  251.13    2.14
   0  -4  12    6.69    0.86
   2  -9   9   58.47    1.37
   2  -5   9   37.22    0.95
   3 -11   4   82.47    1.30
   3  -8   7   40.85    1.11
   3  -7   7   24.10    0.95
   3  -6   7  157.51    1.41
  -3  -7  16  104.00    1.52
  -2  -8  15    2.66    1.03
  -2  -7  15   93.93    1.44
  -2  -6  15   90.79    1.48
  -1 -11  13    2.69    1.08
  -1  -7  14  105.41    1.52
   0 -12  11   36.82    1.48
   1 -13   8   31.33    1.40
   1 -11  10   92.20    1.59
   1  -3  10  173.44    1.33
   3 -10   6    4.91    1.01
  -3  -8  16   78.77    1.39
  -3  -6  16    1.50    0.99
  -1  -6  14   75.23    1.35
  -1  -3  13   11.42    0.82
   0  -2  11   11.96    0.74
   1 -14   6    0.42    1.15
   2 -10   9    7.56    1.18
   3 -11   5    2.96    1.09
   3  -9   7   12.59    1.07
   3  -5   7  104.87    1.17
  -4  -7  17   30.52    1.14
  -2 -13  13    2.98    0.99
  -1 -15   9    1.56    0.94
  -1  -9  14   45.97    1.32
  -1  -5  14    2.20    1.07
   0 -14   9   14.62    1.27
   0 -11  12    5.86    1.36
   0  -8  13    1.24    1.33
   1 -10  11   19.02    1.28
   4  -8   2   10.21    0.68
   4  -8   3   85.64    1.00
   4  -7   3  176.88    1.21
  -4  -8  17   31.03    1.05
  -4  -6  17    1.81    0.96
  -3  -5  16   56.74    1.18
  -1 -13  12    3.55    1.13
   0 -15   7   67.35    1.37
   0  -3  12    9.58    0.89
   1  -4  11  187.09    1.50
   2  -8  10  124.25    1.62
   2  -6  10  106.34    1.39
   3  -7   8   10.74    0.99
  -2 -10  15    3.47    1.09
  -1 -14  11   49.89    1.23
  -1 -10  14    0.85    1.25
   0  -9  13    2.76    1.15
   0  -5  13  105.93    1.53
   1 -14   7  119.80    1.58
   2 -13   6    9.69    1.11
   3 -12   3  125.60    1.47
   3 -11   6    4.58    1.02
   3  -8   8    4.79    1.04
   3  -6   8  121.04    1.33
   4  -9   3   90.78    1.09
   4  -6   4   52.48    0.83
  -2  -4  15   -0.30    0.99
  -1 -12  13   26.68    1.22
  -1  -4  14   16.63    1.06
   1 -13   9   16.60    1.13
   1  -7  12   75.90    1.44
   3 -12   4   10.88    1.03
   4  -9   1  325.83    1.58
   4  -9   4   31.07    0.94
   4  -7   5  158.60    1.33
   0 -15   8    6.74    1.07
   0 -13  11   18.65    1.23
   0 -10  13   14.56    1.20
   1  -9  12   77.64    1.70
   2 -10  10   36.17    1.55
   3 -12   5   63.18    1.37
   3  -5   8  133.18    1.29
  -1  -2  13  126.24    1.29
   0 -14  10   36.24    1.22
   0 -12  12   24.00    1.17
   0  -4  13    6.23    1.02
   1 -14   8   28.38    1.26
   1  -5  12  502.15    2.51
   1  -3  11  219.09    1.57
   1  -2  10   31.45    0.75
   2  -3   9    7.71    0.67
   3 -11   7    4.50    1.09
   3 -10   8    7.04    1.36
   4 -10   3    0.73    0.75
   4 -10   4  137.88    1.49
   4  -9   5  395.69    2.12
  -1 -11  14   70.83    1.42
   3 -12   6   21.93    1.29
   3  -8   9   45.05    1.47
   4  -8   6  111.52    1.37
   4  -5   5  200.15    1.31
  -2  -8  16    3.39    1.18
  -1  -8  15   35.51    1.35
   0 -11  13  113.71    1.71
   1 -10  12   13.50    1.23
   2  -8  11   17.88    1.25
   2  -7  11   94.31    1.51
   2  -6  11   92.62    1.57
   3  -6   9  126.91    1.46
   3  -4   8   17.27    0.90
   4 -10   5   13.36    1.13
   4  -6   6  269.30    1.64
  -2  -6  16  133.50    1.62
  -1  -6  15   34.29    1.15
   0 -15   9    2.21    1.01
   0  -7  14   32.93    1.22
   0  -2  12   41.80    0.90
   0  -1  11  470.64    1.82
   1 -12  11    4.32    1.10
   1  -4  12   23.99    1.12
   2 -13   8   43.62    1.46
   2  -9  11   15.95    1.27
   3  -9   9   70.09    1.47
   3  -3   7    6.79    0.59
  -3  -7  17    3.17    0.93
  -2  -9  16   37.27    1.18
   0  -9  14   56.62    1.50
   0  -6  14  308.72    2.12
   1 -14   9    2.78    1.13
   2 -14   6   33.55    1.28
   3 -12   7  132.81    1.78
   4 -11   3    4.09    1.01
   4 -11   4   22.06    1.12
   4  -8   7  243.03    1.87
   4  -7   7  406.81    2.17
   4  -5   6   33.45    0.83
  -3  -6  17    6.27    1.01
  -2  -5  16   19.21    1.13
  -1 -12  14   10.75    1.09
   0 -14  11    8.80    1.06
   0 -13  12    1.30    1.03
   0  -3  13  359.58    2.02
   1 -11  12  124.44    1.67
   1  -8  13   14.45    1.40
   2 -10  11   38.42    1.38
   3 -13   5    2.24    1.18
   4 -10   6   13.28    1.11
   4  -9   7  133.09    1.75
   4  -6   7   31.62    1.00
   0 -12  13    1.72    1.12
   0  -5  14   25.29    1.10
   1  -9  13    5.98    1.35
   1  -6  13   13.43    1.11
   2  -3  10   12.11    0.77
   2  -2   9  293.14    1.56
   4 -11   5   37.74    1.18
  -4  -7  18   34.95    1.02
   0 -10  14    1.23    1.02
   1  -2  11  283.22    1.59
   2 -12  10    3.09    1.13
   4  -5   7  194.66    1.55
  -1  -4  15   24.41    1.14
   1 -10  13    4.68    1.31
   1  -5  13    2.49    0.99
   1  -3  12   37.23    1.11
   1  -1  10  197.29    1.29
   2 -11  11   21.85    1.44
   2  -8  12   20.15    1.46
   2  -7  12   17.64    1.42
   2  -4  11   86.18    1.27
   3 -12   8   19.95    1.22
   3 -11   9   -0.92    1.17
   3  -9  10   19.71    1.30
   3  -6  10    9.82    1.09
   4 -11   6   19.45    1.16
   4  -8   8   21.04    1.19
   4  -7   8   10.40    1.09
   4  -4   6   20.42    0.73
  -1 -11  15    2.09    1.03
   0  -4  14   24.05    1.16
   1 -15   8    2.44    0.90
   1 -14  10    0.59    1.07
   1 -12  12   13.27    1.19
   2  -9  12    1.87    1.40
   4 -12   4   69.36    1.41
   4  -6   8   35.22    1.13
   5  -8   3   81.08    1.07
   5  -8   4    4.64    0.94
   5  -7   3    4.44    0.66
   0 -11  14    5.38    1.07
   2 -14   8    2.99    1.18
   3 -13   7   24.02    1.36
   3 -10  10    2.05    1.22
   3  -5  10    5.68    1.01
   5  -9   3   39.22    0.99
   5  -9   4  206.40    1.71
   1  -4  13  562.68    2.59
   2 -10  12   91.71    1.73
   2  -5  12   59.98    1.46
   4 -12   5   12.38    1.09
   4 -10   8  178.82    2.03
   4  -5   8  158.90    1.58
   4  -4   7    4.33    0.74
   5  -9   2   16.02    0.77
   5  -8   1  241.98    1.45
   5  -7   5    2.23    0.84
   0  -7  15   25.98    1.18
   1 -15   9    5.47    1.00
   1 -11  13    2.57    1.10
   2 -13  10    1.69    1.18
   2 -12  11   18.83    1.32
   2  -3  11   14.77    1.03
   3  -3   9   76.81    1.17
   4 -12   6  201.83    1.95
   5 -10   3   60.46    1.20
   5  -9   5    0.14    0.99
  -2  -8  17    2.26    0.87
  -2  -7  17    2.30    0.91
  -1  -9  16    1.74    0.99
  -1  -6  16   19.74    1.09
   0  -6  15    4.05    1.09
   3 -13   8   18.93    1.36
   3 -11  10   11.60    1.24
   3  -9  11   19.04    1.52
   3  -7  11    2.86    1.18
   4  -8   9   12.52    1.24
   4  -3   6    6.84    0.65
   5 -10   2   76.49    1.23
   5 -10   4   67.42    1.24
   5  -9   1   47.49    0.87
   5  -8   6   20.03    1.12
   5  -7   6  147.14    1.51
   5  -5   4   90.01    1.00
   1  -9  14   44.83    1.28
   1  -6  14   -0.13    1.07
   1  -2  12    2.05    0.89
   2 -14   9    3.05    1.14
   2 -11  12   39.89    1.45
   3 -14   6   -0.82    1.13
   3  -6  11   72.89    1.44
   4  -9   9  112.97    1.69
   4  -6   9  146.39    1.63
   5 -10   5   10.01    1.06
   5  -6   6   50.17    1.20
   0  -5  15  120.08    1.59
   2  -4  12  345.24    2.08
   2  -1   9    7.28    0.60
   3 -10  11   14.09    1.47
   4 -12   7   28.61    1.45
   4  -4   8   65.50    1.11
   1 -12  13  103.54    1.49
   1 -10  14    2.34    1.12
   2  -9  13   15.16    1.39
   2  -6  13   18.80    1.33
   4 -13   5   14.82    1.26
   4 -10   9    2.39    1.22
   4  -5   9   10.32    1.05
   4  -3   7   94.18    1.06
   5 -11   4  194.79    1.81
   5 -10   6    1.47    1.29
   5  -8   7   16.05    1.19
   3 -14   7   33.26    1.30
   3 -13   9    5.79    1.26
   5 -11   5    8.97    1.25
   5  -9   7   98.76    1.57
   5  -6   7   19.88    1.13
   5  -5   6    4.23    0.83
   2 -12  12   19.34    1.26
   2 -10  13   10.55    1.30
   3  -3  10   22.66    0.95
   4 -13   6    4.50    1.26
   4  -8  10  106.98    1.67
   0  -4  15   11.89    1.04
   2  -2  11   41.47    0.97
   3  -8  12   63.19    1.47
   3  -7  12   26.00    1.30
   4 -11   9    6.44    1.22
   4  -9  10    1.98    1.25
   4  -6  10  117.76    1.61
   5 -11   6   87.42    1.67
   5  -4   5    4.59    0.69
   3 -14   8    0.79    1.15
   3  -9  12    1.95    1.19
   4 -10  10   51.47    1.64
   4  -4   9   32.56    1.10
   5  -9   8  178.79    2.04
   5  -7   8   84.32    1.49
   5  -5   7    5.76    0.95
   1  -7  15   16.62    1.30
   2  -1  10    7.90    0.66
   4 -13   7   45.40    1.32
   4  -5  10   62.64    1.35
   5 -12   4   14.90    1.23
   5  -6   8   53.56    1.32
   5  -4   6  115.98    1.20
  -1  -8  17   10.94    0.89
   3 -10  12    8.75    1.16
   5 -12   5   13.65    1.18
   5 -11   7    1.67    1.15
   6  -8   3   31.43    1.00
   6  -7   3   25.07    0.88
   3   2  11   22.47    0.79
   5  -1  14    3.42    0.79
   8   0  10    2.76    1.06
   9  -1  10   12.35    1.06
   9   1   6    6.24    0.83
  10   0   0    2.40    0.49
  11  -3   9   37.62    1.00
  12  -4   8   30.62    0.85
  12  -3   7    4.43    0.80
  13  -3   3    1.41    0.80
   0   2  11    6.20    0.58
   2   1  13    2.04    0.79
   2   2  11   54.08    0.92
   6  -2  14   17.21    0.85
   7   0  11   99.69    1.44
   7   2   6   87.02    1.16
   8   1   8   79.31    1.21
  13  -5   6    1.69    0.70
  13  -4   5   43.05    0.97
   1   2  11  341.09    1.59
   7  -2  13    4.45    0.77
   8  -2  12    3.03    0.78
   8  -1  11    4.16    0.87
   9   1   2  162.41    1.11
   9   1   5   -0.41    0.73
  10  -1   8    9.67    1.03
  10   0   6   12.79    0.92
   1   1  13    3.29    0.65
   7  -1  12   14.50    0.92
   7   1   9    0.60    0.85
   7   2   4  223.07    1.32
   7   2   5  323.08    1.65
  12  -5   8    7.25    0.75
  12  -2   4    2.15    0.86
   2   0  14   94.15    1.22
   4  -2  15    7.67    0.78
   5  -3  15   -0.78    0.76
   6   2   7    8.52    0.72
   8  -4  13    5.15    0.72
   8   1   7   46.89    1.03
   9  -4  12    2.21    0.69
  10  -3  10    6.56    0.80
  10  -2   9    4.51    0.85
  11  -1   5    0.67    0.79
  12  -3   6    1.36    0.81
  12  -2   1    1.82    0.70
  13  -6   6   -0.56    0.65
   2  -1  15    2.04    0.74
   3  -3  16   22.79    0.82
   3   1  12    5.49    0.85
   4  -4  16    2.23    0.64
   4  -1  14   26.13    1.00
  10   0   4    7.13    0.87
  12  -4   7   18.71    0.87
  12  -2   2   42.19    0.96
  12  -2   3   28.46    0.83
  13  -5   5    3.33    0.77
   2   2  10  159.53    1.16
   6  -3  14   23.35    0.97
   6   2   6   43.20    0.82
   9  -3  11    7.87    0.92
   9   0   7   97.79    1.29
  10   0   2   39.14    0.75
  11  -1   1   17.84    0.62
  11  -1   4   20.20    0.86
  13  -4   3   37.29    0.96
   1   2  10   12.40    0.55
   7   1   8   73.28    1.14
   8   1   6   13.75    0.82
   9  -5  12   15.38    0.78
   9  -2  10    6.26    0.89
  11  -1   2   32.91    0.77
  11  -1   3   44.52    0.90
  12  -3   5    9.54    0.95
   2   1  12   16.00    0.73
   3   2   9  207.41    1.32
   4   1  11   19.95    0.86
   5  -1  13   53.74    1.10
   5   2   7  106.27    1.06
   6   1   9   38.22    0.98
   7  -3  13   -0.13    0.78
   8  -1  10   14.88    0.99
   8   1   2  403.38    1.57
   8   1   5   72.16    1.01
  13  -5   4   29.14    0.91
   1   1  12   44.77    0.85
   3  -2  15  110.78    1.25
   4   2   8  320.53    1.61
   5  -4  15    7.65    0.76
   6  -1  12  102.79    1.34
   7  -2  12   14.11    1.07
   8  -2  11    0.22    0.86
   8   1   4  297.30    1.59
  10  -4  10   61.43    1.09
  10  -2   8    1.31    0.89
  12  -5   7   33.89    0.90
  12  -4   6    5.10    0.92
  13  -6   5    2.97    0.63
   0   1  12  116.46    1.02
   2  -3  16   11.93    0.81
   3  -1  14   42.34    0.98
   4  -3  15   43.84    1.03
   5   2   6  305.52    1.53
   8   0   8  304.14    1.92
   9  -1   8  237.62    1.88
  10  -3   9   59.10    1.12
  12  -3   4    3.39    0.76
   3  -4  16    0.62    0.70
   3   1  11   34.37    0.84
   4   0  12   11.79    0.99
   9  -4  11   29.44    0.94
  13  -7   5    8.65    0.70
   4  -2  14    5.27    0.93
   4   2   7  114.53    1.00
   6   1   8   13.76    0.80
   7   0   9   19.49    0.97
   8  -4  12   28.72    1.00
   9  -2   9   77.75    1.40
   9   0   5   38.66    0.94
  10  -1   0    2.97    0.50
  12  -6   7    1.38    0.75
  12  -3   3   12.92    0.83
  13  -6   4    1.92    0.74
   2  -2  15    3.08    0.77
   2  -1  14    2.81    0.86
   4  -1  13   15.02    0.88
   5  -3  14  115.27    1.36
   5   1   9    8.35    0.76
   6   0  10  259.81    1.79
   7  -4  13   53.67    1.05
   7   1   6    4.57    0.70
   9  -3  10  124.95    1.41
  12  -3   2    1.91    0.70
   1   0  13   16.45    0.84
   2   1  11  207.06    1.35
   5  -5  15    2.08    0.66
   7   1   5  196.17    1.37
   9  -1   7   15.10    1.09
   9   0   3  282.68    1.49
  10  -1   4   29.53    0.98
  12  -7   7   14.64    0.75
   1   1  11   81.87    0.92
   3  -3  15    1.86    0.86
   5  -2  13   17.52    0.93
   6  -1  11   48.47    1.25
   7  -3  12    8.72    1.03
   7  -1  10   25.59    1.04
   7   1   4   82.09    0.94
   8  -3  11    4.91    0.88
  10  -1   1  178.00    1.14
  11  -5   8    8.19    0.87
  11  -4   7    4.00    0.98
  11  -2   3   89.61    1.10
   1  -2  15   36.94    0.96
   1  -1  14   37.87    0.97
   2  -4  16   98.04    1.13
   3   1  10  428.63    1.89
   4  -4  15    0.58    0.74
   6   1   7   29.67    0.81
   8   0   6  101.79    1.27
  10  -6  10    1.29    0.71
  10  -1   2   50.37    0.81
  10  -1   3   49.82    0.89
  12  -4   4    8.69    0.83
   5   1   8  188.32    1.35
   7  -5  13   16.41    0.85
   8  -5  12   10.19    0.84
   9  -2   8    5.98    1.10
  12  -6   6   53.27    1.06
   3  -2  14    3.10    0.79
   3  -1  13  133.66    1.35
   6   1   6   25.97    0.72
   8  -1   8   69.84    1.20
   9  -4  10   12.19    0.90
   9  -1   6   15.58    0.89
  11  -6   8   31.27    0.98
  12  -4   3    0.79    0.86
   2   0  12  329.72    1.73
   2   1  10    7.79    0.64
   4  -3  14    6.45    0.95
   9  -6  11   32.15    0.90
   9  -3   9    0.97    0.91
  12  -4   2    9.70    0.83
   4  -1  12   28.85    1.08
   6  -4  13    4.16    0.95
   6   1   5   15.59    0.61
   7  -6  13   43.58    0.96
   7  -1   9   -0.80    0.91
   7   0   7   30.16    0.89
   8  -6  12   49.76    1.03
   8  -4  11    8.03    0.88
  10  -4   8    4.95    1.04
  11  -5   7   42.74    1.00
  11  -4   6    1.50    0.82
  11  -3   4   51.82    1.11
  12  -7   6    1.10    0.71
   1   1  10  182.86    1.16
   2  -5  16    5.27    0.73
   3   1   9   73.36    0.88
   4  -5  15    9.66    0.77
   4  -2  13   -0.67    0.81
   5   1   7   33.85    0.75
   7  -4  12    1.81    0.83
   8  -3  10    3.37    0.93
   8  -2   9   10.31    0.97
   8   0   2   26.76    0.59
   9  -7  11   10.47    0.79
  11  -7   8   22.40    0.83
  12  -6   5    0.15    0.86
  12  -5   4   37.34    0.98
   2  -2  14   80.91    1.20
   3  -4  15  105.73    1.24
   3   0  11  101.94    1.13
   4   1   8    5.45    0.59
   5  -1  11   35.01    1.03
   7  -3  11    2.80    1.08
   7  -2  10    5.54    1.10
  11  -3   3    1.44    0.80
   0   0  12  217.25    1.32
   5   1   6  591.21    2.02
   6  -3  12    5.52    0.92
   6  -2  11   43.09    1.12
   7  -7  13    1.68    0.73
   8  -7  12   12.65    0.75
  10  -6   9   12.32    0.89
  12  -5   3   31.02    0.99
   2   1   9    6.78    0.59
   4  -6  15    0.79    0.77
   8  -5  11   89.04    1.33
   9  -3   8    3.41    0.92
   9  -1   1   25.66    0.60
   9  -1   3   14.69    0.70
  10  -2   0    3.99    0.51
  11  -6   7  106.38    1.28
  11  -4   5   39.83    1.02
  12  -7   5   18.66    0.88
   1  -1  13    2.64    0.76
   3  -1  12    4.63    0.77
   4   1   7  119.06    0.99
   7  -5  12   86.63    1.31
   7  -1   8   62.66    1.11
  10  -2   3  289.91    1.62
  11  -5   6    4.22    0.83
  12  -6   4   31.97    1.01
   1  -5  16   74.63    1.08
   1  -2  14    0.12    0.74
   3  -2  13   58.22    1.08
   7   0   5   94.90    1.00
   8  -2   8   33.13    1.04
   8  -1   6   20.41    0.84
   9  -6  10   28.30    0.94
  10  -2   2  133.52    1.11
  11  -7   7    0.54    0.87
  12  -8   5   35.35    0.87
   0  -1  13   69.89    0.97
   4  -7  15    1.01    0.71
   6  -1   9   36.34    0.99
   8  -4  10  210.84    1.73
   8  -3   9   16.55    1.01
  11  -4   4   21.32    0.88
   4  -3  13    3.76    0.85
   4  -2  12   38.25    1.12
   5  -1  10  493.04    2.24
   6  -4  12    6.25    1.07
   7  -4  11  175.14    1.62
   7  -2   9   68.39    1.20
   8  -6  11    1.59    0.77
  11  -8   7   36.84    0.97
  12  -7   4    3.64    0.84
  12  -6   3   23.55    0.94
   1   0  11  827.68    2.35
   2  -7  16    0.43    0.62
   2  -1  12   26.21    0.90
   6  -6  13    7.87    0.85
   6  -2  10   27.35    1.16
   7  -6  12    2.57    0.81
   7  -3  10   35.66    1.10
   9  -7  10    9.75    0.84
   9  -5   9    0.78    0.87
  11  -9   7    8.30    0.73
  11  -6   6   17.17    0.92
  11  -5   5   19.06    0.91
  11  -4   3    6.47    0.84
   4  -5  14   10.67    0.93
   6   0   6  877.42    2.50
   7  -1   7  194.05    1.46
  12  -8   4   29.61    0.92
   1  -6  16   10.84    0.77
   1  -4  15  192.84    1.54
   2  -2  13  240.63    1.62
   3  -6  15   12.89    0.87
   3  -4  14    4.16    0.95
   9  -8  10    2.65    0.74
  10  -3   4    7.65    0.77
  11  -4   2    1.43    0.79
  12  -7   3   19.86    0.91
   2  -5  15  111.47    1.31
   2   0  10  438.25    1.77
   6  -7  13   58.24    1.04
   7  -7  12   40.92    1.00
   9  -2   4   52.00    0.99
  11  -7   6   28.28    0.95
  11  -5   4   13.75    0.94
   1  -1  12   27.59    0.81
   7  -5  11    2.07    0.90
   8  -8  11   25.57    0.88
   8  -4   9   17.06    1.01
   8  -3   8    8.27    0.94
   8  -1   3  137.08    1.04
   9  -6   9   24.41    0.97
  10  -3   3  351.20    1.78
  11  -6   5   39.33    1.10
   3  -7  15    4.50    0.77
   3  -2  12   20.42    0.88
   4  -4  13   10.07    0.90
   4   0   8  117.81    1.04
   6  -8  13    1.08    0.70
   7  -8  12   16.64    0.83
   9  -2   3   63.75    0.93
  10  -8   8   11.05    0.83
  10  -4   5    0.92    0.81
  11  -8   6    5.32    0.88
   0  -4  15    8.11    0.85
   1  -7  16    4.77    0.71
   7  -4  10    3.69    0.95
   7  -3   9    1.26    0.90
   9  -5   8   23.34    1.01
  10  -9   8    3.63    0.79
  10  -5   6    4.95    1.01
  10  -3   0   13.18    0.54
  11  -5   3  130.52    1.33
   0  -1  12   80.93    0.96
   5  -4  12   -0.29    0.89
   5  -2  10   43.68    1.03
   6  -4  11   50.59    1.17
   9  -7   9   38.81    1.00
   1  -8  16    0.59    0.63
   1  -5  15   31.14    0.99
   2  -6  15   29.72    0.99
   2  -4  14  101.51    1.24
   3  -8  15    2.97    0.67
   3  -5  14   31.73    0.97
   6  -3  10   49.84    1.14
   7  -6  11   50.06    1.11
  11  -7   5   66.37    1.14
  11  -6   4    3.54    0.91
   0  -3  14    1.21    0.78
   0  -2  13    5.83    0.78
   4  -7  14    1.81    0.78
   8  -5   9   46.86    1.16
   8  -3   7  209.07    1.63
   8  -2   5   16.69    0.87
   9  -8   9   11.09    0.89
  10  -7   7   42.48    1.03
   2  -3  13  342.06    1.91
   2  -2  12   11.84    0.78
   3  -1  10  427.37    1.89
   4  -5  13   61.34    1.24
   8  -7  10    1.11    0.82
   8  -4   8   16.73    1.00
   9  -9   9   14.27    0.88
   9  -6   8    3.15    0.90
   3  -4  13   11.83    1.00
   4  -8  14    3.20    0.77
   4  -1   9  247.54    1.49
   7  -7  11    8.75    0.90
   7  -5  10   25.14    1.06
  10  -8   7    2.76    0.90
  10  -6   6    2.44    0.84
  10  -5   5  211.79    1.62
  10  -4   3   27.88    0.91
   2  -7  15   61.91    1.03
   3  -6  14    3.00    0.93
   6  -7  12    0.96    0.81
   6  -2   8  238.37    1.61
   7  -3   8   18.84    0.94
   8  -8  10    4.34    0.86
   9  -3   4  149.00    1.28
  10  -9   7   39.99    1.04
  11 -10   5   22.94    0.78
  11  -7   4   38.21    0.99
   1  -6  15  231.97    1.65
   1  -4  14    7.22    0.80
   3  -3  12   93.44    1.23
   4  -9  14   11.60    0.72
   7  -4   9   11.61    0.97
   8 -10  10    6.06    0.78
   8  -9  10    4.34    0.87
   8  -6   9   23.70    1.18
   9  -7   8   34.89    1.17
  10 -10   7   18.32    0.80
   1  -2  12    0.84    0.73
   2  -8  15    8.24    0.75
   2  -5  14    2.16    0.79
   4  -2  10   86.82    1.14
   5  -4  11  368.24    2.20
   5  -2   9   15.48    0.83
   6  -4  10    8.42    0.96
   6  -3   9   13.83    0.93
   7  -8  11    1.09    0.81
   9  -3   3   83.22    1.03
  10  -7   6    2.85    0.97
  11  -8   4    1.55    0.90
   0  -1  11  454.93    1.72
   5  -9  13    9.02    0.75
   5  -3  10    4.24    0.86
   6  -9  12    6.48    0.84
   7 -10  11   21.86    0.88
   7  -9  11   10.72    0.84
   7  -6  10    4.89    1.10
   8  -5   8    5.69    1.10
   8  -4   7    7.71    1.05
   8  -2   3    1.29    0.51
   9  -4   5    9.87    0.96
  10  -6   5   14.82    1.02
  10  -5   4   23.00    0.90
  11  -7   3   69.73    1.18
   3  -7  14   22.83    0.94
   4  -1   8    7.26    0.70
   5  -6  12    3.56    1.06
   9  -3   2  394.99    1.71
  11  -9   4   30.96    0.97
   0  -4  14   23.72    0.94
   2  -4  13   41.86    1.01
   3  -5  13    0.14    0.82
   8  -7   9   63.55    1.20
   0  -2  12   42.43    0.83
   2  -6  14  104.35    1.35
   2  -2  11   39.40    0.84
   3  -8  14   14.82    0.92
   7  -5   9   24.80    1.06
   7  -3   7   43.77    0.99
   7  -2   5  225.53    1.39
   9 -10   8    3.74    0.77
  10 -11   6    2.67    0.71
  10  -9   6   10.71    0.95
  10  -5   3   27.72    0.85
  11  -8   3   47.02    1.09
  11  -7   2  134.75    1.34
   0  -3  13  345.28    1.77
   1  -5  14   94.36    1.21
   1  -1  10  195.46    1.21
   2  -3  12   71.20    1.08
   7  -7  10   61.88    1.21
   7  -4   8    1.54    0.88
   8  -8   9    4.23    1.00
   9  -4   4    1.03    0.81
  10 -10   6   42.90    0.98
  10  -7   5   14.52    1.05
   1  -8  15    7.90    0.81
   3  -4  12  124.40    1.38
   5  -7  12   63.36    1.19
   5  -2   8    0.64    0.67
   6  -7  11    5.05    0.92
   6  -5  10    0.78    0.93
   6  -3   8    3.04    0.94
   8  -6   8   66.99    1.24
  10  -6   4   41.81    1.00
  11  -9   3    0.44    0.82
  -1  -2  12  230.41    1.33
   3  -3  11   39.43    0.96
   4  -2   9  173.40    1.33
   7  -8  10    1.25    1.03
   8 -11   9   13.68    0.80
   8 -10   9   -0.17    0.84
   9  -5   5    7.37    1.00
  11  -8   2    5.04    0.87
  -1  -3  13    7.09    0.75
   0  -7  15   21.24    0.91
   1  -9  15   25.24    0.88
   1  -4  13  518.70    2.30
   2  -7  14   16.41    0.99
   4  -3  10   96.42    1.20
   5  -8  12   34.25    1.15
   5  -4  10    2.33    0.88
   6  -8  11   42.14    1.21
  10  -8   5   29.73    0.98
   1  -2  11  276.55    1.51
   2  -5  13   62.95    1.22
   3  -1   8  625.15    2.00
   7 -11  10   25.82    0.85
   7  -9  10    8.16    0.85
   7  -6   9   86.25    1.34
   7  -3   6  137.82    1.26
   8  -7   8    8.27    1.12
   9  -4   3  233.09    1.47
  10  -5   1  218.70    1.38
   0  -5  14   26.17    0.91
   1  -6  14   -0.52    0.93
   1  -3  12   35.16    0.86
   5  -9  12    5.33    0.87
   6 -11  11  107.66    1.26
   7 -10  10    3.07    0.78
   9 -11   7   24.87    0.88
   9 -10   7   26.55    1.01
   9  -9   7   49.35    1.09
  10 -11   5   42.51    1.02
  10 -10   5    3.41    0.92
  10  -7   4   73.31    1.15
   2  -8  14   37.76    1.09
   5 -10  12    2.03    0.78
   6 -10  11    1.90    0.82
   7  -5   8    3.58    0.92
   7  -4   7  113.25    1.30
   9  -7   6   35.17    1.20
   9  -4   2   -0.49    0.63
   2  -4  12  337.21    1.97
   3  -7  13   12.44    0.93
   3  -5  12   62.60    1.17
   6  -3   7    5.86    0.74
   7  -7   9   13.82    1.03
   8  -8   8    9.99    0.97
   9  -5   4  159.78    1.38
   0  -4  13    7.57    0.87
   0  -2  11   13.46    0.64
   2  -3  11   12.98    0.77
   4  -5  11  101.06    1.47
   6  -5   9    4.26    0.94
   6  -2   5    8.79    0.58
   9  -6   5  212.75    1.65
  -1  -5  14    0.99    0.80
   0 -10  15    0.68    0.70
   1  -7  14  110.72    1.38
   2  -6  13   15.99    1.09
   3  -8  13   31.07    1.15
   4  -7  12    0.58    0.92
   5  -7  11   10.61    1.17
   5  -5  10   77.36    1.28
   6  -7  10    3.01    0.97
   7  -3   5   60.32    0.91
   8  -9   8   61.86    1.18
   8  -3   2    3.59    0.49
   9  -8   6   19.77    0.99
   9  -4   0   86.69    0.86
  10 -12   4    9.08    0.74
  10  -7   3   20.19    0.85
   0  -6  14  289.34    1.87
   0  -3  12    9.00    0.65
   4  -4  10   46.74    1.18
   4  -3   9    4.87    0.87
   5  -4   9   45.80    1.06
   5  -3   8  252.06    1.60
   7  -8   9   27.06    1.09
   7  -6   8   12.80    1.17
   8 -10   8    0.22    0.87
   9 -12   6    1.41    0.80
  10 -11   4   -0.46    0.83
   7 -12   9    9.84    0.79
   7  -4   6  125.65    1.37
   8  -7   7   28.32    1.08
   8  -4   4    3.84    0.69
   9 -11   6   54.14    1.16
   9  -9   6  105.87    1.35
  10 -10   4    5.55    0.86
  -1  -2  11   23.00    0.66
   1  -8  14   72.65    1.26
   1  -2  10   33.11    0.75
   5  -8  11   29.90    1.10
   5  -2   6  299.18    1.48
   6  -8  10   15.78    1.04
   7 -11   9    4.69    0.93
   7 -10   9   19.89    1.11
   7  -9   9    4.78    0.94
  10  -8   3   18.53    1.03
  10  -7   2   21.14    0.95
  -1  -4  13   70.07    1.00
   1  -4  12   21.63    0.86
   2  -7  13   18.43    1.10
   4  -9  12   28.93    1.03
   4  -6  11    1.59    1.11
   6 -12  10   35.36    0.95
   6  -9  10   15.03    1.16
   6  -6   9   10.08    1.01
   6  -3   6    0.07    0.63
  -1  -9  15   -0.54    0.81
  -1  -3  12   13.65    0.73
   1  -9  14   44.12    1.14
   1  -3  11  217.80    1.44
   2  -5  12   58.08    1.12
   4 -11  12   -0.03    0.81
   4 -10  12    2.58    0.91
   5 -11  11    9.60    0.95
   5  -6  10    5.85    1.00
   6 -11  10    4.08    0.90
   6 -10  10   86.68    1.29
   7  -7   8   16.77    1.23
   8  -8   7   40.03    1.16
   9  -5   2  176.23    1.30
  10  -9   3   57.79    1.21
  -1 -10  15    1.06    0.75
  -1  -6  14   71.95    1.18
   0  -7  14   36.21    1.11
   0  -5  13  106.12    1.29
   1 -11  14    4.61    0.81
   1 -10  14    2.71    0.84
   1  -6  13   11.63    1.02
   2  -2   9  297.06    1.49
   3  -2   8   27.11    0.76
   4  -2   7  101.06    0.97
   5 -10  11   51.32    1.13
   8 -12   7   17.84    0.91
   9  -8   5   27.01    1.02
  10 -11   3    1.70    0.87
   2  -8  13    0.53    1.02
   5  -5   9   23.17    1.17
   5  -3   7   87.46    1.03
   8 -11   7    7.96    1.03
   9 -12   5   37.91    1.04
  10  -8   2   39.43    1.09
   2  -3  10   15.25    0.73
   4  -5  10   63.27    1.20
   5  -4   8   27.32    0.93
   7  -8   8   34.08    1.17
   7  -6   7   29.74    1.08
   7  -4   5  166.74    1.34
   7  -3   3   33.37    0.66
   9 -11   5   32.98    1.11
   9  -9   5   46.87    1.14
   9  -6   3    5.10    0.77
   0  -8  14  157.57    1.56
   0  -4  12    8.24    0.81
   0  -2  10  131.78    1.00
   2  -9  13   13.09    1.07
   3  -3   9   75.43    1.01
   4  -4   9   32.06    0.95
   5  -7  10   51.13    1.26
   7  -5   6    5.78    0.86
   8  -5   4    6.23    0.76
   8  -4   2  200.81    1.31
   9 -10   5    7.94    0.96
  10  -9   2   60.37    1.18
   0  -3  11  123.84    1.15
   2 -11  13    2.78    0.88
   2 -10  13   10.25    1.01
   2  -6  12  145.60    1.52
   6  -8   9   13.35    1.27
   7 -12   8   46.24    1.12
   7  -9   8   17.21    1.08
   8 -13   6    1.21    0.84
   9  -5   0  367.95    1.59
  10 -10   2  135.51    1.46
  10  -8   1  100.49    1.28
  -1  -5  13    2.79    0.86
   0  -9  14   49.99    1.18
   1  -7  13   25.04    1.02
   6  -6   8   18.51    1.05
   7 -11   8   13.09    0.95
   7 -10   8   60.53    1.27
   9  -6   2   24.88    0.91
   0 -10  14    1.56    0.94
   0  -6  13   86.98    1.31
   3 -12  12    2.95    0.81
   5  -6   9   15.62    1.21
   6 -12   9    2.36    0.91
   6  -9   9  149.29    1.80
   6  -5   7  123.18    1.47
   6  -4   6   39.18    0.90
   7  -7   7   10.37    1.03
   9  -7   3   23.52    1.01
   3 -11  12   74.23    1.30
   3 -10  12    7.20    0.94
   4 -12  11    4.87    0.90
   4  -9  11   47.02    1.39
   5 -12  10    6.33    0.93
   5  -3   6  250.67    1.45
   6 -10   9    1.81    0.99
   8  -5   3  284.72    1.66
   9 -12   4    1.12    0.88
   9  -9   4   92.86    1.34
  -1  -4  12   39.54    0.89
   1  -8  13   15.00    0.99
   1  -4  11  198.61    1.48
   1  -3  10  183.59    1.30
   2  -7  12   18.37    1.15
   2  -5  11   74.85    1.20
   4 -11  11   13.23    1.03
   4 -10  11    2.50    0.97
   5 -11  10   45.92    1.16
   5 -10  10    2.19    1.17
   6  -3   4  173.70    1.21
   8 -11   6    4.28    0.95
   8 -10   6   83.85    1.37
   8  -7   5  158.93    1.55
   9 -11   4   10.32    0.97
   9 -10   4    6.26    1.07
  -1  -8  14    9.77    0.91
   3  -5  10    7.55    1.01
   5  -5   8   66.05    1.17
   5  -4   7  193.22    1.45
   6  -7   8    6.05    1.03
   7  -8   7   29.35    1.15
   7  -5   5   11.68    0.82
   9 -13   3    9.03    0.87
  -2  -7  14   -0.55    0.79
  -2  -5  13  139.66    1.29
   1  -9  13    5.85    1.08
   2  -4  10   14.33    0.80
   4  -3   7   94.79    1.01
   9  -8   3  100.00    1.28
  -1  -9  14   46.04    1.19
   0  -7  13   60.04    1.15
   0  -5  12  246.26    1.67
   1 -11  13    1.55    1.02
   1 -10  13    4.59    1.05
   2  -8  12   20.34    1.23
   3  -4   9   23.72    0.84
   3  -3   8  245.22    1.46
   4  -7  10    0.05    1.00
   4  -4   8   67.46    1.03
   5  -7   9   44.85    1.23
   7  -9   7    0.85    1.03
   7  -4   3   36.76    0.79
   8 -13   5   30.82    1.01
   8  -8   5    4.33    0.95
   8  -5   2  460.38    1.94
   9  -6   0   70.24    0.95
  -1 -11  14   67.23    1.19
  -1 -10  14    0.11    0.95
  -1  -6  13   93.27    1.23
   6 -13   8   16.40    0.97
   6  -8   8  105.83    1.52
   6  -6   7  255.68    1.84
   6  -4   5    8.65    0.67
   7 -10   7   20.08    1.12
   9  -9   3   14.69    0.93
  -2  -4  12  218.89    1.43
   5  -3   5   82.01    0.91
   6  -5   6   14.76    0.85
   7  -7   6    7.06    0.97
   8 -14   4   60.98    1.13
   8 -12   5   16.80    1.04
   8  -9   5    2.26    0.96
   9 -11   3   23.90    1.16
   9 -10   3  102.52    1.47
  -2  -3  11  197.44    1.23
   0  -4  11    3.41    0.67
   0  -3  10   27.79    0.75
   4 -13  10   27.89    1.04
   4  -8  10  110.79    1.55
   5  -8   9  424.63    2.47
   5  -6   8   55.53    1.19
   6 -12   8   48.32    1.24
   6  -9   8   43.78    1.29
   8 -11   5   10.40    1.13
   8 -10   5   33.46    1.26
   8  -6   3   10.16    0.78
   9  -8   2    1.65    0.89
   9  -7   1    8.54    0.82
   1  -7  12   78.37    1.28
   1  -5  11  197.18    1.55
   3 -12  11   16.84    1.03
   3  -9  11   21.24    1.31
   3  -6  10   10.52    0.98
   5 -12   9   26.47    1.22
   5  -9   9    4.93    1.28
   6 -10   8  120.08    1.60
   8  -5   1  133.41    1.10
  -2 -12  14   28.81    0.88
  -2  -9  14   -0.36    0.80
  -2  -6  13   54.70    1.08
  -1  -7  13    1.99    0.93
  -1  -5  12  136.04    1.33
   0 -12  13    0.39    0.89
   0  -9  13    3.33    1.03
   3 -11  11   24.16    1.25
   3 -10  11   14.04    1.26
   4  -9  10    1.79    1.07
   5 -11   9    1.12    1.20
   5 -10   9   89.35    1.64
   5  -5   7    8.66    0.83
   5  -4   6  124.73    1.17
   6  -7   7   36.25    1.15
   7 -13   6   32.19    1.09
   7  -8   6    9.15    1.03
   8 -13   4   22.73    1.11
   9 -12   2    1.99    0.96
   9  -9   2  122.64    1.45
  -2 -11  14    0.69    0.86
  -2 -10  14  147.25    1.52
   0 -11  13  121.46    1.56
   0 -10  13   14.44    1.14
   0  -6  12   96.68    1.26
   1  -4  10    3.04    0.73
   1  -3   9   28.57    0.75
   4 -11  10    9.18    1.05
   4 -10  10   47.97    1.30
   4  -3   6    6.23    0.56
   8  -8   4  133.12    1.46
   9  -7   0   66.90    1.03
   1 -13  12    4.68    0.92
   1  -8  12    9.32    1.15
   3  -5   9  127.49    1.34
   4  -5   8  165.11    1.46
   4  -4   7    4.18    0.78
   5  -7   8   86.86    1.51
   7 -12   6    2.18    1.01
   8 -14   3    6.40    0.90
   8  -6   2   24.56    0.86
   9 -11   2   14.47    1.00
   9 -10   2    2.46    0.93
   9  -8   1  146.93    1.43
  -1  -4  11   17.74    0.75
   3  -7  10  154.08    1.62
   3  -4   8   17.70    0.83
   3  -3   7    7.84    0.58
   4  -7   9  117.18    1.63
   6 -13   7    7.38    1.12
   6  -8   7   31.86    1.18
   6  -6   6  207.90    1.64
   7 -14   5   22.94    0.99
   7  -5   3   64.39    0.97
   8 -12   4   41.09    1.18
   8  -9   4   23.54    1.06
   8  -7   3    6.63    0.82
   1 -12  12   14.06    1.09
   6  -5   5    1.62    0.67
   8 -11   4    4.08    1.12
   0  -5  11    4.89    0.83
   1 -11  12  128.77    1.67
   1 -10  12   14.27    1.22
   2 -13  11    3.63    0.94
   5 -13   8    7.63    1.11
   5  -8   8    2.20    1.23
   6  -9   7  153.62    1.84
   9  -9   1   69.99    1.16
   9  -8   0  137.65    1.34
  -2  -7  13   20.77    0.91
  -1 -12  13   28.54    1.05
  -1  -9  13    2.99    1.05
   0  -7  12   77.71    1.25
   3 -13  10    1.27    1.04
   3  -8  10   13.20    1.27
   4 -13   9   48.57    1.31
   5  -6   7   21.12    0.97
   6 -11   7  189.19    1.99
   6 -10   7    4.74    1.29
   7 -13   5   68.49    1.39
   8  -8   3    1.02    0.96
   8  -6   1    2.90    0.66
   9 -11   1   17.79    1.09
   9 -10   1    5.43    0.97
  -1 -11  13    1.60    1.05
  -1 -10  13  150.29    1.67
  -1  -6  12  101.49    1.21
   2 -12  11   19.57    1.12
   4  -8   9   14.47    1.16
   4  -6   8   36.84    1.19
   5 -12   8    0.29    1.20
   5  -9   8  185.47    1.97
   5  -5   6    5.66    0.73
   5  -4   5    3.47    0.59
   6 -14   6   26.65    1.13
   6  -7   6    0.76    0.91
   8 -14   2   47.34    1.15
   8  -7   2    0.78    0.82
   0  -4  10   54.16    0.86
   2 -11  11   21.74    1.13
   2 -10  11   41.89    1.27
   3 -12  10    2.17    1.18
   3  -9  10   19.54    1.35
   4 -12   9    0.36    1.17
   7 -12   5   23.33    1.26
   7  -5   2  104.65    1.04
   8 -12   3    4.94    1.10
   8  -9   3   75.03    1.35
  -2 -13  13    2.21    0.87
  -2  -8  13    4.43    0.99
  -2  -4  11   60.72    0.88
   0 -13  12    1.47    0.90
   0  -8  12   64.65    1.25
   1 -14  11   12.56    1.02
   1  -7  11    1.64    0.93
   1  -5  10    5.23    0.73
   3 -11  10   12.97    1.32
   3 -10  10    2.08    1.29
   4  -9   9  120.30    1.63
   6 -15   5   29.49    1.09
   7 -14   4    0.90    1.01
   7 -11   5    4.39    1.19
   7 -10   5   30.80    1.32
   4 -11   9    7.25    1.13
   4 -10   9    2.22    1.12
   4  -5   7  213.55    1.51
   4  -4   6   22.64    0.69
   5  -7   7    2.14    0.94
   6  -8   6   15.39    1.20
   6  -6   5  185.18    1.50
   7 -15   3    3.36    0.89
   7  -6   3  325.24    1.74
   8 -11   3   98.61    1.42
   8 -10   3    5.31    0.96
   8  -6   0  589.84    2.06
   0 -12  12   24.81    1.20
   0  -9  12   51.09    1.34
   0  -6  11  305.48    1.91
   1  -4   9  967.64    2.73
   2  -7  10    3.99    1.09
   3  -5   8  146.56    1.33
   8 -13   2    1.82    1.01
   8  -8   2   52.25    1.15
  -2 -12  13    3.59    0.90
  -2  -9  13  116.21    1.43
  -1  -7  12  116.15    1.34
  -1  -5  11   33.33    0.81
   0 -10  12  262.85    2.10
   1  -8  11  219.09    1.93
   2  -4   8  292.22    1.57
   3 -14   9   41.27    1.18
   3  -7   9   33.08    1.10
   3  -4   7  579.18    2.12
   4  -7   8   13.52    1.01
   7 -13   4    6.30    1.17
   8  -7   1 1401.70    3.39
  -2 -11  13   23.87    1.16
  -2 -10  13   15.67    1.12
   5  -8   7   14.68    1.07
   5  -6   6   54.65    1.04
   6  -9   6    1.60    1.02
   7  -8   4   12.67    0.95
   6 -14   5    2.26    1.02
   6 -11   6  149.67    1.75
   6 -10   6   12.77    1.13
   6  -7   5  150.18    1.45
   8 -12   2   51.26    1.23
   8  -9   2   32.99    0.99
  -1 -13  12    1.93    1.02
  -1  -4  10   99.93    0.97
   3 -13   9    7.27    1.02
   3  -8   9   47.17    1.38
   4 -15   7   17.94    1.06
   4  -8   8   21.60    1.11
   5 -12   7   79.49    1.62
   5  -5   5  110.99    1.10
   7 -15   2   45.87    1.09
   7 -14   3    0.78    0.96
   7 -12   4  117.75    1.55
   7  -9   4  149.05    1.57
   7  -7   3   18.15    0.81
   8 -11   2   11.13    1.02
   8 -10   2   54.86    1.14
  -3 -12  13    5.46    0.94
   0  -7  11  662.57    2.73
   0  -5  10   16.22    0.73
   2 -15   9    2.40    0.89
   2 -12  10    8.40    1.27
   2  -6   9   54.39    1.15
   3 -15   8    3.19    0.88
   4  -6   7   31.41    0.93
   5 -10   7  413.32    2.60
   6 -15   4    9.54    0.92
   7 -11   4  104.96    1.49
   7 -10   4    2.13    0.97
   8 -13   1   57.36    1.29
   8  -8   1  152.33    1.37
   8  -7   0  283.65    1.57
  -3  -9  13   16.29    0.92
  -3  -6  12   18.47    0.85
   2  -9  10   13.66    1.10
   3 -12   9   15.79    1.16
   4 -12   8   85.10    1.51
   4  -9   8    6.31    1.08
   6 -13   5   24.76    1.26
   6  -8   5   84.68    1.40
  -3 -11  13    3.78    1.00
  -3 -10  13   10.52    1.03
  -2  -7  12   -0.37    0.75
  -1 -11  12  136.89    1.69
  -1  -9  12  440.29    2.39
  -1  -6  11   79.42    1.15
   2 -10  10   37.20    1.26
   3 -11   9   -1.94    1.29
   3 -10   9   27.74    1.41
   4 -11   8   24.05    1.24
   4 -10   8  178.09    1.84
   4  -5   6   34.27    0.79
   5  -7   6  147.75    1.44
   7 -13   3   15.52    1.15
   8 -12   1    0.09    1.03
   8  -9   1   45.41    1.08
   0  -4   9  205.25    1.28
   1 -14  10   -0.13    0.96
   4 -14   7    6.94    1.14
   7  -8   3  172.08    1.48
  -2 -13  12    0.73    0.98
   0  -8  11   14.51    0.97
   2 -14   9    3.92    1.04
   2  -5   8  344.92    1.73
   3 -14   8    0.60    1.10
   3  -5   7  106.25    1.09
   4  -7   7  409.96    2.15
   5 -15   5    4.47    0.93
   5 -13   6   80.50    1.57
   6 -14   4   25.73    1.21
   7 -15   1   -1.62    0.75
   7 -14   2    1.61    1.05
   8 -10   1   27.69    1.00
   8  -8   0   81.38    1.09
  -2  -8  12  791.65    2.94
   2  -7   9   10.01    0.90
   5  -8   6   19.26    1.00
   5  -6   5  101.70    1.12
   6 -15   3    5.57    0.99
   7 -12   3    1.83    0.97
   7  -9   3    8.26    0.87
   7  -6   1  510.68    1.90
  -1 -14  11   48.46    1.15
   0 -11  11    2.81    1.14
   0  -9  11   89.06    1.36
   0  -6  10  170.53    1.42
   5  -5   4   89.91    0.94
   7 -11   3   43.86    1.18
   7 -10   3   17.00    1.00
  -3  -7  12  155.77    1.39
  -2  -9  12    3.95    0.95
  -1  -7  11  128.45    1.32
  -1  -5  10  217.77    1.39
   0 -10  11    0.95    0.98
   1 -15   9    3.62    0.95
   2 -13   9   17.02    1.27
   3 -13   8   20.47    1.31
   4 -15   6    7.93    0.97
   4 -13   7   43.78    1.27
   4  -8   7  237.44    1.79
   5 -12   6    3.55    1.08
   5  -9   6   57.16    1.23
   6  -6   3  300.85    1.57
   8  -9   0    3.09    0.81
  -2 -11  12    8.98    1.07
   1 -12  10    3.00    1.03
   2 -15   8    0.29    0.97
   2  -8   9    4.65    0.91
   3 -15   7   12.08    1.01
   3  -8   8    5.17    0.93
   4 -16   5   15.34    0.94
   4  -6   6  282.93    1.63
   5 -11   6   87.76    1.47
   6 -13   4   73.97    1.34
   7 -13   2  112.85    1.47
   8 -11   0    9.25    0.96
   8 -10   0   90.25    1.25
  -3 -13  12    7.48    1.00
  -1 -13  11    5.74    1.05
   0 -14  10   34.23    1.21
   1 -11  10   90.89    1.47
   1 -10  10   42.08    1.39
   2 -12   9   41.44    1.44
   4 -12   7   25.45    1.21
   4  -9   7  126.41    1.51
   5  -7   5    3.56    0.86
   6 -16   1    0.89    0.81
   7 -14   1   36.77    1.17
  -1  -8  11  575.86    2.54
   2  -9   9   54.19    1.23
   2  -6   8    3.96    0.69
   3 -16   6    8.58    0.88
   3 -12   8   20.40    1.19
   3  -9   8   12.72    1.04
   3  -6   7  160.11    1.30
   4 -11   7   86.03    1.48
   4 -10   7   12.46    1.09
   4  -5   5  204.98    1.27
   5 -16   3    4.09    0.87
   5 -15   4    5.90    1.04
   6 -14   3   -0.02    1.05
   6 -12   4   18.96    1.08
   7 -12   2    3.02    1.03
   7  -7   1  354.19    1.69
  -3  -8  12   65.53    1.09
   0  -7  10   22.40    0.87
   0  -5   9   55.42    0.81
   2 -11   9   44.40    1.29
   3 -11   8  299.41    2.19
   3 -10   8    7.99    1.06
   6 -11   4   78.58    1.34
   7 -11   2  102.55    1.43
   7  -9   2  163.24    1.42
  -3 -12  12    0.79    1.01
  -2 -14  11   -0.43    0.88
  -1 -12  11   22.19    1.06
  -1  -9  11    4.72    1.02
   1 -14   9    3.81    1.02
   3 -14   7   35.19    1.31
   4  -7   6    1.21    0.86
   6  -7   3   24.94    0.76
   7 -10   2   85.69    1.22
  -3 -11  12    1.34    1.02
  -3  -9  12  142.57    1.43
  -2  -7  11   42.13    0.96
  -1 -10  11   52.99    1.30
   2 -14   8    3.48    0.98
   3  -5   6  311.89    1.52
   7 -13   1    1.86    0.93
  -4 -13  12    3.68    0.90
  -3 -10  12   26.71    1.02
  -1  -6  10   26.24    0.75
   0 -15   9    3.16    0.96
   0  -8  10   28.70    0.98
   2  -7   8   24.92    0.98
   2  -5   7   11.57    0.59
   3  -7   7   23.21    0.85
   4 -16   4  114.92    1.44
   4 -13   6    4.33    1.06
   6 -13   3    7.92    1.01
  -2 -13  11   59.57    1.31
   1 -13   9   17.05    1.09
   5 -11   5   10.02    1.05
   5 -10   5    9.18    1.15
   5  -9   5    0.75    0.87
   6  -8   3   28.63    0.84
   7 -12   1    1.52    1.03
   0  -9  10   19.19    0.98
   1  -8   9    2.33    0.98
   2 -15   7    9.15    1.08
   2 -13   8   42.86    1.26
   3 -13   7   24.36    1.18
   4 -12   6  194.08    1.96
   4  -8   6  113.07    1.28
   5 -16   2    8.57    0.86
   5 -15   3    0.01    1.00
   6 -14   2   70.85    1.29
   6 -12   3   34.50    1.24
   7  -9   1   26.69    0.91
  -5 -13  12   20.13    0.95
  -4 -12  12   19.32    0.95
  -2 -15  10   -0.16    0.82
   0  -6   9    9.46    0.64
   3  -8   7   40.00    1.00
   4  -9   6    1.14    1.04
   5  -7   4   28.61    0.77
   6  -9   3   88.19    1.16
   7 -13   0  121.41    1.47
   7 -11   1    6.11    0.84
   7 -10   1    4.55    0.88
  -4  -9  12   44.92    0.98
  -1  -7  10   30.33    0.91
   1 -16   7   10.72    0.98
   1  -9   9   29.19    1.07
   2 -16   6   41.86    1.13
   3 -12   7  134.46    1.66
   4 -10   6   13.96    1.02
   5 -13   4   13.89    1.22
   6 -11   3   47.64    1.14
   6 -10   3   21.12    0.95
   6  -7   2    4.02    0.63
  -4 -10  12   17.53    0.90
  -2 -11  11    6.78    1.07
  -1  -5   9  214.40    1.24
   0 -14   9   12.97    1.00
   1 -10   9   40.19    1.16
   1  -6   8  162.45    1.22
   2 -11   8    5.21    1.23
   2  -9   8   19.20    0.99
   3 -11   7    5.89    1.05
   3  -9   7   12.42    0.95
   3  -6   6  164.12    1.19
   6 -13   2   14.90    1.11
  -3 -13  11    2.69    1.03
  -2 -10  11   54.50    1.14
   1 -14   8   25.79    1.26
   2 -10   8  187.09    1.72
   2  -6   7   25.08    0.70
   3 -14   6    0.14    0.99
   3 -10   7    5.63    0.98
   4 -16   3   43.87    1.13
   5  -8   4    4.45    0.71
   6 -15   0    7.32    0.92
   7 -12   0  313.57    1.97
  -4 -14  11    1.88    0.91
  -2  -6  10   34.72    0.71
  -1 -15   9    0.03    0.90
   2 -14   7    1.09    0.99
   4 -13   5   15.00    1.26
   4  -7   5  152.93    1.22
   5 -16   1   40.71    1.01
   6 -14   1   -0.70    1.03
  -3 -15  10   30.61    1.05
  -2 -14  10    1.83    0.93
  -1  -8  10  561.47    2.33
   0 -13   9   12.91    1.06
   0  -7   9    4.91    0.68
   0  -5   8   56.60    0.78
   6  -8   2  306.14    1.60
   7 -11   0  237.59    1.71
   7 -10   0    1.23    0.77
   7  -9   0   21.04    0.71
  -3 -12  11   24.71    1.12
  -3  -8  11   10.17    0.81
  -1 -11  10  185.78    1.81
  -1  -9  10  282.35    1.90
   0 -15   8    7.21    1.01
   3 -15   5    7.69    0.95
   3 -13   6   62.09    1.49
  -1 -16   8    1.43    0.82
  -1 -10  10   25.30    1.02
   1 -13   8   24.41    1.16
   1  -7   8   17.39    0.73
   2 -13   7  119.19    1.59
   2  -7   7  313.72    1.66
   4 -12   5   14.21    1.06
   4  -8   5   84.73    1.08
   6 -11   2    7.16    0.87
   6 -10   2   33.93    1.03
   6  -9   2    8.23    0.71
   7 -12  -1   65.30    1.18
   7  -8  -1   63.92    0.83
  -5 -14  11    7.56    0.87
  -4 -13  11   47.54    1.18
  -3 -11  11    4.39    0.87
  -2 -13  10    1.91    1.07
  -1 -14   9   56.95    1.35
  -1  -6   9   53.72    0.84
   4 -11   5   38.29    1.28
   5 -16   0    1.71    0.84
   6 -13   1   58.20    1.27
   6  -7   1  145.98    1.04
  -4 -15  10    0.61    0.85
   0 -11   9  115.47    1.60
   1 -16   6    2.94    0.99
   1 -12   8    8.87    1.25
   1  -8   8   15.81    0.93
   3 -12   6   22.54    1.14
   3  -8   6   94.68    1.13
   4 -16   2   24.05    1.09
   4 -10   5   12.29    0.93
   4  -9   5  368.08    1.97
   6 -14   0    2.46    0.89
   7 -11  -1  169.18    1.44
  -3 -14  10    0.85    1.00
   0 -10   9    3.73    0.93
   2 -12   7   -0.96    1.02
   2  -8   7  138.33    1.29
   3 -14   5   82.03    1.54
   5 -15   1    1.21    0.95
   5 -14   2    0.97    0.95
   5 -12   3   23.60    1.18
   7  -9  -1   10.12    0.63
  -4 -12  11   25.30    1.07
   0 -14   8   29.18    1.13
   1 -11   8   47.77    1.21
   1  -9   8   10.93    0.87
   2 -11   7    1.86    1.02
   3 -17   2   13.26    0.90
   3 -11   6    3.31    0.97
   3 -10   6    3.33    0.90
   3  -6   5  245.68    1.31
   6 -12   1    3.49    0.84
   6  -8   1  282.77    1.49
  -5 -13  11   14.96    0.95
  -4  -8  11  114.31    1.15
  -2 -16   8   45.61    1.11
  -2  -8  10    5.96    0.70
  -1 -13   9   -0.61    0.98
   1 -14   7  111.70    1.53
   1 -10   8    0.52    0.90
   2 -14   6   29.93    1.18
   2 -10   7   12.35    0.96
   2  -9   7   18.11    0.93
  -5 -15  10    0.74    0.76
  -4 -11  11   53.94    1.21
  -2 -11  10    2.92    0.89
  -2  -9  10   87.49    1.26
  -1 -15   8   17.83    1.04
  -1  -7   9   33.45    0.75
   1  -6   7  130.09    1.03
   2  -6   6   62.35    0.79
   6 -14  -1    3.28    0.95
   6 -13   0   38.04    1.15
   6 -11   1   36.57    0.95
   6  -9   1   38.94    0.87
   0 -15   7   63.91    1.39
   2 -17   3   28.31    1.00
   3 -13   5    1.28    1.02
   4 -16   1   35.52    1.07
   4 -14   3    4.68    1.14
   4 -12   4   61.78    1.41
   6 -10   1   24.41    0.82
  -5 -12  11  203.43    1.71
  -3 -15   9    0.71    0.86
  -1 -16   7   49.08    1.15
   1 -15   6   26.95    1.10
   1 -13   7    2.65    1.23
   2 -13   6    9.54    1.13
   3  -7   5   22.61    0.66
   5 -15   0    3.26    0.99
   5 -14   1   56.48    1.30
   5  -7   2  261.69    1.33
  -3  -7  10    7.40    0.57
  -1  -8   9  221.86    1.50
   0 -17   5   84.53    1.29
   1 -17   4    1.83    0.83
   1 -16   5  113.47    1.52
   3 -17   1    0.30    0.81
   4 -11   4   19.32    0.99
   6 -12   0  301.95    1.92
  -4  -6  10  120.26    1.00
  -3 -12  10    8.26    0.95
  -2  -6   9    0.89    0.47
  -1 -14   8   13.82    1.22
  -1  -9   9   79.83    1.24
   0 -12   8   31.97    1.17
   1  -7   7   34.29    0.75
   2  -7   6  212.61    1.32
   3 -14   4    8.42    1.22
   3 -12   5   61.89    1.29
   4 -10   4  123.63    1.33
   4  -9   4   29.64    0.86
  -5 -11  11    1.09    0.84
  -5  -9  11  153.06    1.37
  -3  -8  10  184.78    1.40
   1 -12   7   14.12    1.09
   2 -12   6   17.23    1.10
   5  -8   2   14.21    0.62
   6 -13  -1  166.54    1.50
   6 -11   0   54.38    1.06
   6  -8   0   65.01    0.79
  -6 -12  11   28.83    1.04
  -5 -14  10    6.49    0.89
  -4 -15   9   24.95    1.04
  -3 -11  10  563.49    2.59
  -2 -15   8   -0.73    0.91
   0 -14   7   12.87    1.09
   0 -11   8   17.40    1.04
   3 -11   5    2.54    0.93
   3  -9   5   88.51    1.23
   4 -16   0    4.99    0.99
   5 -15  -1   39.05    1.13
   5 -11   2   24.50    0.94
   6 -10   0  204.88    1.46
   6  -9   0  117.18    1.11
  -3 -10  10   -0.06    0.80
  -3  -9  10    5.57    0.74
   0 -10   8   65.42    1.18
   0  -9   8   70.14    1.11
   1 -11   7   14.54    1.03
   1  -8   7  208.98    1.44
   2 -17   2    5.44    0.86
   2 -11   6    0.36    0.94
   2  -8   6  109.49    1.12
   3 -17   0    8.91    0.90
   4 -14   2  128.50    1.62
   5 -13   1   12.50    0.97
   5 -10   2   68.33    1.05
   5  -9   2   14.86    0.70
  -2 -16   7    8.57    0.95
  -2 -12   9    5.52    1.16
  -1 -15   7    4.59    0.97
   1 -10   7   13.19    0.94
   1  -9   7  172.14    1.45
   2 -15   4   11.28    1.21
   2 -10   6  177.87    1.56
   2  -9   6  147.94    1.36
   4 -15   1   15.06    1.04
   4  -7   3  163.44    1.11
   6 -12  -1   21.15    1.01
  -6 -14  10   32.70    1.05
  -4 -12  10   27.23    1.18
  -4  -7  10    1.60    0.62
   0 -15   6    4.08    1.17
  -5 -15   9    6.71    0.91
  -5 -13  10   47.20    1.21
  -2 -11   9   21.75    1.14
  -1 -17   5    9.78    0.91
  -1 -16   6    1.79    0.97
   0 -17   4   15.38    0.94
   1 -16   4   34.92    1.24
   4 -16  -1    9.59    0.94
   4  -8   3   79.01    0.99
   5 -12   1   11.48    0.91
  -3 -13   9   24.22    1.22
  -2 -14   8  113.54    1.54
  -2  -8   9    9.60    0.70
  -1 -12   8    5.31    1.22
   0 -16   5    1.26    0.97
   1 -13   6    1.97    1.07
   3 -16   1    2.12    0.96
  -4 -14   9   38.21    1.18
  -4 -11  10    1.21    0.86
  -4  -8  10    9.23    0.66
  -2 -10   9   13.41    0.92
  -2  -9   9   36.87    0.93
  -1  -7   8   83.54    0.93
   2 -17   1    0.32    0.85
   3 -15   2   27.66    1.11
   3  -7   4   35.83    0.67
   4 -13   2   48.82    1.20
   4  -9   3   87.78    1.07
   5 -14  -1  163.57    1.66
   5 -13   0   42.99    1.20
   5 -11   1   49.90    1.12
   6 -10  -1   50.10    0.93
   6  -9  -1  222.83    1.37
  -6 -15   9   43.96    1.08
  -4 -10  10    2.73    0.78
  -3 -16   7   56.56    1.20
   0 -12   7    5.91    1.06
   2 -14   4   35.57    1.40
   2 -12   5   45.17    1.23
   4 -16  -2   42.46    1.14
   4 -15   0   25.04    1.08
   4 -14   1    5.19    1.15
   5  -8   1  209.58    1.26
   6 -12  -2    5.90    0.90
  -6 -13  10   28.51    1.04
  -5 -12  10   19.25    1.01
  -2 -15   7   39.84    1.19
   0 -14   6    6.30    1.30
   0  -7   7 1042.47    2.70
   2  -7   5   96.92    0.93
   3 -11   4   77.11    1.25
   3  -8   4  217.31    1.37
  -2 -17   5    4.03    0.97
   0 -11   7   78.27    1.47
   1  -7   6   46.46    0.76
   2 -15   3   75.72    1.41
   2 -11   5   11.60    1.15
   3 -17  -2    7.40    0.89
   3 -10   4   74.20    1.14
   3  -9   4   28.12    0.84
  -5 -14   9   29.84    1.12
  -5 -11  10   31.94    1.14
  -4 -13   9  278.18    2.13
  -3  -7   9   30.86    0.69
  -2 -16   6   82.32    1.40
  -1 -15   6    5.59    1.05
   0 -17   3   23.70    1.09
   1 -11   6   32.33    1.11
   2 -17   0    5.48    0.96
   2  -8   5   88.07    0.99
   3 -16   0   19.09    1.04
   5 -14  -2   21.69    1.07
   5 -12   0   65.26    1.13
  -3 -11   9    9.78    0.95
  -2  -6   8  207.41    1.19
  -1 -16   5   18.94    1.22
  -1 -13   7   38.30    1.44
   0 -15   5   24.39    1.18
   0 -10   7    1.62    0.86
   0  -9   7   38.02    0.94
   1 -16   3   15.15    1.03
   2 -10   5   19.89    0.93
   2  -9   5  214.84    1.51
   3 -14   2    5.76    1.18
   4 -15  -1   30.24    1.21
   5 -13  -1    8.21    1.03
  -6 -12  10    3.71    0.93
  -5 -10  10    1.77    0.92
  -3  -8   9   97.72    1.07
   1 -10   6   38.28    1.08
   1  -9   6   51.31    0.99
   2 -13   4   29.26    1.21
   3 -15   1    3.36    0.99
   4 -13   1   15.69    1.03
   4 -11   2    8.27    0.89
  -6 -14   9    3.59    1.03
  -4  -6   9    2.54    0.54
  -3  -9   9    5.11    0.76
   1 -13   5    3.05    1.09
   3 -12   3  123.70    1.52
   4 -14   0   73.25    1.31
   5 -11   0  607.05    2.44
  -5 -15   8    2.45    0.97
  -4 -12   9    0.39    0.96
  -3 -17   5    0.37    0.95
  -3 -15   7   -0.26    0.96
   1 -17   1    0.81    0.93
   2 -17  -1   40.99    1.16
   2 -16   1   17.80    1.13
   2 -14   3    1.86    1.27
   3 -16  -1   30.22    1.21
   5 -10   0   44.42    0.96
   5  -8   0    4.72    0.56
  -6 -11  10    7.59    0.89
  -5 -16   7    8.33    0.99
  -5 -13   9   18.68    1.10
  -4 -14   8   15.78    1.23
  -3 -16   6   -0.66    1.00
  -2  -7   8    7.00    0.56
  -1 -14   6   14.62    1.38
  -1 -12   7   36.87    1.23
   2 -12   4   22.94    1.12
   3 -11   3   32.11    1.18
   4 -15  -2    0.80    1.02
   5 -12  -1    8.40    0.94
   5  -9   0    3.31    0.57
  -7 -14   9   34.31    1.13
  -6 -10  10   44.10    1.10
  -2 -17   4   10.48    1.05
  -2 -15   6    0.85    1.23
   0 -17   2   12.49    1.04
   0 -12   6    7.40    1.08
   1 -12   5    2.27    1.05
   4 -12   1   11.97    0.95
   5 -13  -2    9.69    1.02
  -6 -15   8    4.33    0.92
  -2  -9   8   47.57    0.99
  -2  -8   8  162.23    1.28
  -1 -17   3   -0.43    0.95
  -1 -11   7  311.41    2.19
   1 -15   3   20.02    1.19
   3 -15   0    6.35    1.04
   3 -10   3   23.79    0.89
   3  -8   3  240.75    1.44
  -7 -11  10   -0.04    0.94
  -6 -16   7   -1.03    0.90
  -2 -13   7   33.85    1.28
  -1 -16   4    8.71    1.04
   0 -16   3    7.48    1.05
   0 -15   4   11.58    1.17
   2 -17  -2   -0.21    0.93
   2 -11   4    3.74    0.93
   2  -7   4   57.61    0.85
   3 -16  -2    0.78    1.03
   3 -14   1  133.74    1.63
   3  -9   3    1.09    0.66
   4 -14  -1   -1.01    0.98
   4 -13   0   49.70    1.19
  -7 -15   8    5.57    0.95
  -5 -12   9    9.43    1.00
  -4 -16   6   15.98    1.15
  -4  -9   9   10.90    0.88
  -3 -14   7   24.62    1.40
  -1 -10   7    9.50    0.92
   0 -11   6    7.44    1.00
   1 -17   0   21.11    1.08
   1 -11   5   99.16    1.40
   2 -16   0   17.72    1.13
   2 -13   3  104.40    1.55
   4 -11   1   10.47    0.86
   5 -11  -1  332.75    1.86
  -5 -14   8    6.64    1.10
  -4 -13   8    3.91    1.23
  -1 -13   6   15.53    1.21
  -1  -9   7    9.84    0.80
   1  -7   5  169.39    1.16
   2 -10   4   56.37    1.08
   2  -8   4   35.07    0.76
   5 -12  -2    0.48    0.94
  -7 -13   9   12.02    1.11
  -3 -17   4    0.08    0.93
   0 -13   5   42.29    1.35
   0 -10   6  393.18    2.15
   0  -8   6   16.69    0.72
   1 -13   4  169.59    1.86
   1 -10   5   33.70    1.02
   2 -15   1   28.05    1.22
   2  -9   4   19.98    0.80
   3 -16  -3    0.66    1.02
   4 -10   1   38.28    0.89
   4  -8   1  432.01    1.78
  -5 -15   7    7.00    1.16
  -5 -11   9   52.11    1.17
  -3 -16   5    7.79    1.21
  -3 -15   6    4.39    1.10
  -3 -11   8  125.65    1.55
  -2 -17   3   10.38    1.11
  -2 -14   6   49.36    1.41
  -2 -12   7   26.80    1.22
  -1 -17   2    6.79    1.11
   0  -9   6    9.01    0.79
   1  -9   5    6.94    0.75
   4 -14  -2    5.56    1.13
   4 -12   0  336.38    2.14
   4  -9   1  305.55    1.62
  -8 -13   9    3.89    1.04
  -6 -14   8    2.27    1.13
  -6 -12   9    0.76    1.00
  -3  -7   8  942.31    2.61
  -1 -14   5   42.96    1.61
   1 -17  -1    2.29    0.97
   1 -14   3   32.52    1.33
   2 -16  -1    1.03    1.10
   3 -14   0    4.92    1.26
   4 -13  -1   31.51    1.22
  -5  -7   9    0.47    0.60
  -4 -12   8   75.44    1.56
  -3 -10   8    7.43    0.91
  -2 -16   4   51.12    1.34
  -2 -15   5   62.88    1.48
  -1 -12   6    4.72    1.13
   0 -16   2    6.12    1.10
   5 -11  -2  330.22    1.91
  -5 -13   8    5.22    1.09
  -5  -9   9    1.52    0.82
  -5  -8   9   80.21    1.08
  -4 -17   4    3.99    1.08
  -3  -9   8   42.39    0.97
  -3  -8   8   34.80    0.82
  -1 -16   3   12.65    1.16
   0 -15   3   97.58    1.66
   1 -12   4  131.20    1.66
  -7 -14   8    6.54    1.19
  -7 -12   9  106.12    1.60
  -6 -16   6   25.48    1.17
   1 -17  -2   23.24    1.18
   2 -15   0   28.20    1.42
   4 -14  -3    4.51    1.11
   4 -11   0   17.01    0.91
  -4 -16   5    2.69    1.13
  -3 -17   3    2.23    1.09
  -1 -11   6   77.07    1.39
   2 -16  -2    6.62    1.19
   3 -12   1  273.62    2.03
   3  -8   2    5.83    0.60
   5 -10  -2   27.62    0.87
  -8 -14   8   10.26    1.01
  -7 -15   7   22.62    1.19
  -3 -14   6    2.47    1.23
  -2 -17   2   -1.01    1.07
  -2  -7   7  120.76    1.06
   0 -11   5   46.94    1.25
   1 -13   3    2.50    1.18
   1 -11   4   10.57    1.04
   3 -14  -1   87.80    1.62
   4 -13  -2   23.28    1.24
  -6 -13   8    4.03    1.13
  -6 -10   9   65.44    1.31
  -5 -14   7   24.62    1.27
  -5 -12   8    6.28    1.29
  -3 -16   4    2.46    1.32
  -2  -8   7   61.57    0.96
  -1 -13   5    8.41    1.28
   0 -13   4   18.52    1.32
   1 -17  -3   -0.22    1.04
   3 -13   0    4.95    1.07
  -8 -15   7  110.07    1.47
  -4 -10   8   17.83    1.13
  -2 -14   5   12.21    1.35
  -1 -10   6   19.18    1.01
   0 -17  -1  126.01    1.69
   1 -14   2    0.68    1.24
   1 -10   4   54.60    1.14
   2 -12   2   90.32    1.65
   3 -15  -3    2.44    1.10
  -6  -9   9   29.17    0.98
  -4 -17   3   16.01    1.26
  -2 -16   3    0.67    1.19
  -2 -12   6  200.65    2.16
  -1 -16   2   81.35    1.62
  -1 -14   4    5.18    1.33
   0 -14   3   21.32    1.40
   0 -10   5    5.56    0.93
  -4  -9   8    0.28    0.79
   0  -9   5   20.20    0.87
   1 -16  -1   18.44    1.32
   1  -9   4   40.81    0.95
   1  -8   4   37.18    0.81
   4 -11  -1   17.40    0.93
  -7 -10   9   18.58    1.13
  -1 -12   5    6.72    1.23
   0 -12   4    5.47    1.40
   3 -15  -4    9.03    1.24
   5 -10  -3  308.30    1.75
  -8 -13   8   15.07    1.28
  -6 -12   8   15.34    1.20
   4 -12  -2  154.45    1.59
  -5 -17   3   -0.67    1.08
  -3 -10   7  219.31    1.86
  -2 -11   6   67.09    1.44
   2  10   1    5.56    0.57
   4   8  14    5.40    0.80
   4  12   2  140.53    1.41
   5  11  11    8.81    0.97
   5  12   9   26.03    1.08
   6  11  11   83.72    1.17
   6  13   6    4.71    1.25
  -2   6  10   46.20    0.84
   1  10   3    3.94    0.56
   2  11   3    5.76    0.79
   3   9  13   19.06    0.96
   7  13   7    4.02    0.98
  -1   8  10  578.67    2.39
   1   8  13   16.51    0.95
   3  12   4    7.72    0.91
   4  12   9   -0.39    1.15
   6  13   2    9.13    1.02
  -2   7   8    7.17    0.58
   0  10   7    1.08    0.82
   6  12  10   24.56    0.98
  -2   7   9  116.77    1.08
  -1   8   4  155.83    1.01
   0   9   3    9.74    0.52
   0   9  11   94.23    1.37
   0  10   6  458.70    2.10
   1  11   6   43.92    1.09
   1  11   7   12.46    1.01
   2   8  14   20.68    1.01
   2   9  13   16.07    0.94
   2  11  10    7.47    1.09
   3  11  11   14.26    1.15
   5  12  10    6.91    0.89
   5  13   3   28.79    1.10
   1  11   8   45.96    1.24
   2  10  12   91.97    1.37
  -1   9   6   18.36    0.72
   1  10   2    0.49    0.50
   1  11   9    5.02    1.26
   4  12  10    4.03    0.97
   4  13   6    6.82    1.28
   5  13   2   38.33    1.09
   0   8  13    2.65    0.89
   1  11   4   13.91    0.80
   2  10   0  403.19    1.55
   3  12   2   26.69    0.93
   4  11  12    0.85    0.87
   4  13   4    9.96    1.00
  -3   4  10   18.36    0.57
  -2   6  12    6.75    0.72
  -1   7  13    2.10    0.93
  -1   8  12   23.05    1.11
  -1   9   5  483.25    1.89
   1   9  13   10.05    0.94
   2  12   8   49.32    1.34
   3   9  14    3.26    0.79
  -3   5   9  183.27    1.09
  -2   8   7   72.19    0.91
  -2   8   8  157.61    1.26
  -2   8   9    8.42    0.76
   0   9   2   14.81    0.51
   1  10  12   15.96    1.05
   2  12   9   41.86    1.48
   3  12  10    2.28    0.98
   4  13   3   58.69    1.20
   5  12  11    6.11    0.80
   7  14   4    1.55    1.15
  -3   5  10  113.55    0.96
  -1   9  11    0.44    1.10
   0  10  11    2.58    1.02
   1  11   3    6.30    0.81
   2   9  14   19.82    0.99
   3   8  15    1.85    0.74
   5  13   9   -0.23    0.89
  -3   3  11   28.88    0.57
  -3   4  11   97.49    0.89
  -3   6   8  214.17    1.24
  -2   8   6   64.29    0.83
  -2   8  10   11.42    0.84
  -1   6  14   72.62    1.14
   0  11   7   41.79    1.13
   1   7  15   20.11    0.92
   2  12   3    3.45    0.87
   3  13   5    0.67    1.00
   3  13   6   35.96    1.24
   6  14   4   21.51    1.24
   6  14   5    6.47    1.29
  -3   5  11   75.69    0.94
  -2   7  12    0.55    0.77
  -1  10   8    2.11    0.90
  -1  10   9  136.34    1.63
   0   6  15    4.50    0.87
   0   9  13    5.29    1.10
   0  10   3  153.33    1.15
   1  10   1    4.00    0.49
   2  12  10   13.48    1.12
   3  12   1  313.39    1.72
   3  13   4    4.53    1.11
   3  13   8   18.28    1.36
   4  13   2   38.72    1.08
   4  13   9   49.56    1.27
  -3   6  10   88.56    0.96
  -1  10   6   19.89    0.86
   3  12  11   29.46    1.08
   5  14   5   26.68    1.38
   6  14   7    7.05    1.03
  -3   4  12  149.36    1.17
  -2   8   5  144.26    1.05
   0  11  10    0.87    1.26
   1   9  14   62.71    1.19
   5  14   4    5.09    1.13
  -3   5  12   81.13    1.02
  -3   6  11  145.72    1.23
  -3   7   8  910.46    2.50
  -3   7   9   16.43    0.70
  -2   9   7  232.24    1.52
  -2   9   9   16.52    0.93
   3  10  14   16.23    0.82
   3  11  13   38.89    0.99
   3  13   3    5.01    0.89
  -3   7   7   33.51    0.75
  -2   7  13   19.28    0.91
  -2   8  12  791.72    2.95
  -1   9   3  224.28    1.24
  -1  10  11   58.08    1.44
   0  11   4    7.29    0.76
   1  11  12  135.46    1.59
   1  12   4  164.83    1.57
   2  13   6   20.04    1.14
   5  14   3   29.96    1.18
  -2   9   6   52.45    0.89
   0  10   2  271.63    1.43
   0  11  11    1.05    1.06
   1  12  10    7.95    1.12
   2  10  14    0.87    0.81
   2  13   5    3.01    1.01
   2  13   8   53.35    1.37
   4  14   6   91.93    1.58
  -3   7  11    0.98    0.74
  -2   8   4    9.11    0.51
  -2   9  11  300.67    2.01
  -1   9  13    1.75    0.93
   0   9  14   61.55    1.32
   2   9  15   20.89    0.86
   2  13   9   18.05    1.35
   3  13   2   67.85    1.19
   3  13  10    2.26    0.97
   4  14   4    5.45    1.12
  -3   7   6  222.28    1.22
  -3   8   9  102.71    1.17
  -2   9   5   40.54    0.87
  -1  11   7  310.01    2.01
  -1  11   8    8.72    1.03
  -1  11   9    2.02    1.03
   0  12   8   34.40    1.24
   2  13   4   39.50    1.11
  -3   5  13   83.20    1.14
  -3   8   8   20.14    0.76
  -2   8  13   12.09    0.95
  -1  10  12   15.93    1.10
  -1  11   6  115.75    1.36
   0  12   9    2.13    1.11
   1  10   0  249.38    1.27
   1  12  11    3.34    1.02
  -3   8   7  155.51    1.20
  -2  10   7    1.66    0.83
  -1   7  15    5.07    0.93
  -1  11  10  174.99    1.81
   0  11  12    4.40    1.02
   1   9  15   37.99    1.03
   1  11   1    6.63    0.69
   1  11  13    2.02    0.98
   2  12   1    5.59    0.78
   2  13  10   -0.46    1.02
   3  13  11    1.18    0.95
   3  14   6    0.99    1.13
  -2  10  10  487.66    2.52
  -1   9   2  192.89    1.16
   1  13   6    3.00    1.02
   1  13   8   39.29    1.30
   2  13   3   87.46    1.23
  -4   4  10   90.64    0.83
  -4   5  10   15.21    0.59
  -3   8   6   72.85    0.88
  -2  10   6  406.93    2.01
  -2  10  11   43.38    1.38
  -1   9  14   45.18    1.26
  -1  10   3   70.92    0.94
   1  13   5    1.64    1.11
   1  13   9   16.11    1.18
   3  14   4    9.45    1.13
  -4   4  11   14.97    0.65
  -4   5  11  260.12    1.47
  -4   6  10  106.28    1.09
  -3   7  13   32.04    1.10
  -3   9   9    4.77    0.86
  -2   9   4   68.07    0.87
   0  10   1    3.07    0.54
   0  10  14    2.10    0.95
   1  12   2   51.65    1.02
  -4   6   8  365.64    1.56
  -3   9  10    3.42    0.90
  -2   8  14    8.01    0.90
  -1   8  15   38.92    1.05
   0   9  15    4.10    0.83
   0  12   4    4.71    0.82
   1  13  10   26.06    1.18
   2  14   7    0.12    1.18
  -4   6  11  164.47    1.30
  -3   9   7    0.31    0.71
  -3   9  11   65.50    1.25
  -2  10   5   24.57    0.82
  -2  10  12   32.56    1.18
   0  11   2    1.46    0.61
   1  11  14    3.30    0.87
   2  14   6   50.34    1.33
   3  14   3  377.69    2.22
   5  15   5    3.39    1.00
   5  15   6   28.62    1.16
  -4   4  12  103.26    1.05
  -4   5  12  173.48    1.33
  -4   6   7  474.24    1.69
  -4   7   9  127.02    1.16
  -3   8   5  234.06    1.31
  -2  11   8   50.49    1.23
  -2  11   9   23.44    1.14
  -1  12   7   44.44    1.22
  -1  12   9   85.12    1.50
   0  13   8    1.63    1.29
   1  10  15   18.03    0.81
   2  14   5   -0.28    1.00
   5  15   4    9.04    1.04
  -4   6  12  449.92    2.10
  -4   7   8   18.05    0.67
  -4   7  11    6.99    0.88
  -3   8  13   65.36    1.22
  -2  11   7   28.68    1.08
  -2  11  10    4.15    1.08
  -1  12  10    9.32    1.15
   0  12  12   23.93    1.10
   1  12  13  105.18    1.40
   1  13  11    0.87    1.03
   2  14   9    8.65    1.14
  -3  10   9   19.22    1.20
  -1   9  15    0.62    0.96
  -1  10   2  174.28    1.22
  -1  10  14    1.13    0.94
   0  12   3   12.59    0.81
   0  13   6    2.49    1.01
   1  13   3    6.91    0.94
   2  14   4   45.91    1.30
   4  15   5   11.78    1.07
  -4   7   7   10.63    0.59
  -4   7  12  462.19    2.26
  -4   8   9   21.31    0.85
  -4   8  10   11.90    1.00
  -3  10  10    0.49    1.00
  -2  11   6   36.20    1.06
   0  10  15    0.61    0.83
   0  11  14    5.45    0.93
   0  13  10   18.00    1.17
   2  14  10    1.68    0.94
   4  15   4    0.13    1.03
  -4   5  13    9.89    0.76
  -4   6  13   38.37    1.03
  -4   8   8  137.31    1.24
  -3  10   7  247.54    1.73
  -3  10  11   52.20    1.43
   0  13   5   60.30    1.23
   1  12   1   91.04    1.12
   1  14   6    1.49    1.22
   1  14   7  105.38    1.57
  -3   8   4  107.18    0.93
  -3   8  14  116.20    1.50
  -3   9   5   85.17    0.99
  -3   9  13   24.38    1.07
   0  12  13    1.71    0.93
   1  13  12    5.58    0.92
   1  14   9    3.97    1.15
   2  14   3    3.82    1.03
   3  15   7   21.57    1.28
  -4   7   6   35.28    0.68
  -4   7  13   81.44    1.29
  -4   8   7   33.11    0.80
  -4   8  12   65.42    1.32
  -3  10   6   16.09    0.99
   0  11   1  121.80    1.08
   1  14   5    6.98    1.01
  -4   9   9    8.89    0.90
  -4   9  10  166.29    1.58
  -2  12  10  307.35    2.38
  -1  12   4    7.24    0.85
  -1  13   9    0.82    1.29
   0  10   0   14.76    0.54
   0  12   2    4.27    0.84
   0  13   4    5.20    0.92
   1  13   2    9.23    0.94
  -4   9  11   60.64    1.25
  -3  11   9    5.23    1.06
  -2   9  15    6.46    0.94
  -1  10  15    1.63    0.84
  -1  13  10   57.45    1.54
   3  15   4    8.79    1.08
  -4   6  14    8.62    0.95
  -4   8   6   57.78    0.86
  -4   8  13   40.20    1.26
  -3   9   4    8.05    0.72
  -3   9  14   81.80    1.34
  -3  11  10  544.81    2.79
  -2  11   4   49.74    1.09
  -2  12  11    0.68    1.09
  -1  13   6   30.44    1.17
   1  14   4   19.23    1.06
   2  15   6  105.61    1.59
   2  15   7    4.19    1.10
  -5   4  10   11.01    0.57
  -5   5   9    8.86    0.55
  -5   5  10  182.31    1.22
  -5   5  11   13.90    0.73
  -5   6  10   37.63    0.80
  -4   7  14    1.48    1.02
  -4   9   7   56.15    1.02
  -3   8  15  174.04    1.70
  -3  10   5   28.26    0.87
  -3  11   7   59.73    1.24
  -3  11  11    3.08    1.10
  -1   9  16    1.49    0.78
  -1  10   1    5.33    0.59
  -1  11   2  227.47    1.46
  -1  12  13   36.94    1.19
  -5   4  11  491.08    1.88
  -5   6  11   29.43    0.84
  -2   8  16    3.81    0.91
  -1  12   3  134.07    1.42
  -1  13   5   10.52    1.12
   0  13   3   52.68    1.09
   0  14  10   20.89    1.27
   2  15   5    9.58    1.09
  -5   5  12   60.34    1.00
  -5   6   8   88.34    0.93
  -5   6  12   21.99    0.97
  -5   7   9    1.41    0.69
  -5   7  11  114.68    1.28
  -4  10   9  222.80    1.83
  -4  10  10    2.89    1.03
  -3  11  12    2.85    1.08
  -2  12   5   12.13    1.12
   1  14   3   31.21    1.17
  -5   4  12   28.41    0.79
  -5   7   8  169.03    1.33
  -4   8   5    7.98    0.59
  -4   8  14    3.97    1.04
  -4   9   6  217.18    1.50
  -4   9  13   74.79    1.33
  -4  10   8    7.53    0.97
  -4  10  11   42.52    1.25
  -3  10  14    2.91    1.11
  -2  10  15    3.13    0.90
  -2  11  14    0.63    0.97
  -1  11  15    0.64    0.90
  -1  13  12    2.27    1.10
   0  14   5    1.90    1.00
   2  15   4   10.44    1.07
  -5   7  12  151.31    1.46
  -5   8   9   84.00    1.26
  -5   8  10   83.79    1.22
  -3   9  15   93.73    1.43
  -3  12   9   62.57    1.59
  -2  13   9   93.78    1.57
   0  12   1   29.65    0.91
   1  15   7    2.68    1.12
   1  15   8    7.54    1.09
  -5   5  13  156.53    1.40
  -5   6   7   19.60    0.61
  -5   6  13   21.37    0.99
  -4  10   7   48.16    1.11
  -3  12   8    0.75    1.08
  -3  12  10    7.86    1.16
  -2   9  16   36.14    1.02
  -2  10   2  213.31    1.34
  -2  11   3    4.65    0.74
  -2  12  13    1.77    1.04
  -2  13  10    0.91    1.10
  -1  13   4  177.44    1.72
  -5   7   7  162.96    1.21
  -5   7  13   42.28    1.15
  -5   8   8   16.76    0.81
  -5   8  12   55.51    1.18
  -4   7  15   78.32    1.25
  -3   9   3    0.66    0.53
  -3  12   7   14.97    1.28
  -2  12   4   81.80    1.32
  -1  14   7   81.84    1.49
  -1  14   9   37.84    1.26
   0  13   2    3.59    0.93
   0  14   4   44.81    1.27
  -5   9  10  286.14    1.97
  -4   9   5    1.63    0.66
  -4  10   6  333.75    2.01
  -4  10  13   11.45    1.07
  -4  11   9   20.83    1.16
  -4  11  10    5.33    1.12
  -3   8  16   79.69    1.26
  -2  13   6    1.42    1.04
  -1  13  13    3.92    0.92
  -5   8   7    8.04    0.72
  -5   8  13  194.50    1.83
  -5   9  11  129.56    1.56
  -4  11   8   11.58    1.09
  -4  11  11   60.29    1.41
  -2  11  15   20.75    1.02
  -1  11   1   11.41    0.65
  -1  12   2   36.51    0.90
  -1  14   6   15.54    1.10
   3  16   5   27.07    1.07
  -5   9   8   31.43    1.00
  -4  11  12   39.31    1.45
  -3  10  15    1.52    0.92
  -3  11  14  120.98    1.56
  -2  10  16    4.89    0.85
  -2  13  12    0.27    1.08
  -1  14  11   63.70    1.34
   0  15   8   17.81    1.16
  -5   7   6   76.57    0.90
  -4  11   7    5.09    1.01
  -3  10   3  704.33    2.45
  -3  11   4   78.81    1.25
  -2  13   5   95.98    1.42
  -1  13   3  203.40    1.66
   0  15   6    2.70    1.14
  -5   9   7    0.56    0.94
  -5   9  13    2.44    1.14
  -5  10  10    2.32    1.04
  -4   9  15   37.41    1.19
  -4  10   5   20.09    1.00
  -3  13   9   22.24    1.43
  -1  14  12    0.60    1.00
  -5   8   6    5.45    0.67
  -5  10   9   62.01    1.31
  -5  10  11    9.43    1.10
  -4   9   4  306.11    1.63
  -3  13   8  243.85    2.11
  -2  14   9    3.29    1.08
   2  16   5    7.13    1.04
  -6   5  10   22.81    0.77
  -6   5  11  120.80    1.20
  -6   6  10   42.73    0.87
  -6   6  11   63.17    1.03
  -6   7  11   55.11    1.19
  -4  11   6  210.79    1.77
  -4  12   9    0.16    1.12
  -4  12  10   36.85    1.32
  -3  13   7    1.47    1.32
   0  15   5   23.66    1.13
  -6   5   9  159.16    1.21
  -6   5  12   54.27    1.01
  -6   6   9   15.93    0.70
  -6   6  12  115.06    1.27
  -6   7   9   28.83    0.87
  -6   7  12  108.99    1.45
  -4   8  16   17.17    1.02
  -4  12   8  124.58    1.67
  -3  11  15    3.73    0.90
  -2  10   1    7.11    0.56
  -2  13   4    3.52    1.08
  -2  14  11   -0.36    1.07
  -1  14   4    7.36    1.00
  -6   4  10   16.66    0.64
  -6   4  11   90.95    1.02
  -5   7   5   10.49    0.58
  -5   9   6  217.98    1.57
  -5  10   7   91.60    1.33
  -4  10  15   93.16    1.47
  -4  12   7   72.53    1.56
  -4  12  12   19.12    1.17
  -3  10  16    0.81    0.77
  -2  14   6   51.23    1.42
  -1  12   1   40.52    0.99
  -1  15   7    3.49    1.18
   1  16   7   20.86    1.04
  -6   6  13  162.14    1.49
  -6   7   8  141.90    1.26
  -6   7  13  256.61    1.93
  -6   8   9   66.08    1.14
  -6   8  12   17.75    1.02
  -5  11  11    0.68    1.10
  -2  14  12   14.41    1.10
  -1  13   2   70.55    1.26
  -1  15  10    0.46    0.94
   0  15   4   10.67    1.11
   1  16   6    2.81    0.95
  -6   4  12  161.77    1.25
  -6   5   8   35.44    0.68
  -6   5  13   21.30    0.85
  -6   9  10  375.30    2.34
  -5   8   5  149.93    1.21
  -5  11   8  162.46    1.87
  -5  11  12  147.43    1.89
  -4  12  13   25.62    1.27
  -3  13  13    0.77    1.05
  -1  11   0   58.88    0.94
  -1  15   6    5.51    1.09
  -6   8   8   67.06    1.10
  -6   8  13   13.66    1.03
  -6   9   9   37.08    1.26
  -6   9  12   73.31    1.51
  -5  10  14   57.99    1.29
  -2  12   2  301.28    1.88
  -2  14   5   12.28    1.24
   1  16   5  107.61    1.41
  -6   6   7  264.88    1.45
  -6   6  14    8.47    1.03
  -6   7   7   79.81    1.00
  -6   7  14   73.20    1.38
  -5   9   5    1.62    0.84
  -5   9  15   27.23    1.10
  -5  10   6   68.98    1.20
  -4  13  10    7.76    1.16
  -3  13   5    7.93    1.02
  -3  14   8   -1.03    1.27
  -2  13   3   19.08    1.09
  -1  14   3   86.33    1.34
  -6   9   8   50.50    1.14
  -6   9  13   30.31    1.30
  -4  11  15   15.47    0.99
  -4  13   8    2.82    1.13
  -4  13  11   64.97    1.41
  -3  14  11  105.19    1.59
  -2  11   1  161.32    1.28
  -1  15   5    1.21    1.01
   0  16   7    1.11    0.95
  -6   8   7    3.17    0.75
  -6   8  14   71.00    1.29
  -6  10  10   36.59    1.25
  -5   7   4  220.41    1.28
  -5  12  11  203.51    2.13
  -4  11   4  197.54    1.72
  -2  15  10    0.47    1.00
   0  16   6   56.68    1.33
  -6  10   9   71.38    1.38
  -5  10  15   11.38    1.07
  -5  11  14  142.82    1.75
  -5  12  12    3.65    1.29
  -4  12   5   27.43    1.11
  -4  13   7  261.58    2.17
  -2  14   4    8.19    1.16
  -6   7  15   13.76    1.07
  -6   9   7   35.50    1.04
  -6  10   8  107.97    1.62
  -5  10   5    5.40    0.86
  -5  11   6    4.57    0.99
  -5  12   8   11.81    1.19
  -4  10   3  206.19    1.48
  -3   9   1   19.21    0.60
  -3  11   2  660.21    2.53
  -3  13   4   42.31    1.29
  -3  14   6    2.29    1.24
  -1  15   4   80.15    1.45
   0  16   5    0.52    0.99
  -6   6   6    8.25    0.58
  -6   7   6  343.73    1.71
  -5   9  16   11.44    0.95
  -4  13  13   34.96    1.19
  -2  10   0  367.77    1.68
  -1  13   1    0.71    0.74
  -1  16   8    0.72    1.04
  -7   6  10  120.00    1.29
  -7   6  11   25.46    0.90
  -7   6  12   39.00    1.10
  -7   7  10  229.26    1.70
  -7   7  11   87.02    1.27
  -7   7  12   15.52    1.12
  -6   8   6   41.36    0.92
  -6  11  11   52.14    1.40
  -5   9   4  183.95    1.41
  -5  12   7   13.46    1.16
  -1  16   7   45.28    1.25
  -7   5  11    2.69    0.79
  -7   8  11   54.46    1.22
  -7   8  12   17.25    1.18
  -6  10   7   35.24    1.15
  -6  10  14   49.59    1.40
  -6  11   9    1.29    1.12
  -4  14   9   45.22    1.34
  -4  14  10   22.54    1.18
  -2  13   2   86.14    1.37
  -7   5  10   83.60    1.03
  -7   5  12  579.94    2.37
  -7   6   9  187.19    1.42
  -7   6  13  260.45    1.89
  -7   7  13   31.12    1.06
  -7   8   9   98.54    1.45
  -6   9   6  296.02    1.87
  -6   9  15   31.38    1.16
  -6  11   8    2.37    1.30
  -5  11  15   11.73    1.00
  -5  13  10   69.94    1.50
  -5  13  11   16.00    1.17
  -4  14  11    1.26    1.09
  -3  14   5  266.54    2.11
  -3  15  10   34.31    1.29
  -7   5   9   85.79    1.04
  -7   8  13   66.64    1.33
  -7   9  10  112.02    1.53
  -7   9  12    7.38    1.08
  -5  13  12   22.72    1.32
  -2  14   3   54.15    1.25
  -1  15   3    4.90    1.09
  -7   4  11  133.54    1.21
  -7   5  13   12.65    0.85
  -7   7   8   27.30    0.89
  -7   7  14  199.15    1.86
  -7   9   9    2.91    1.01
  -6   7   5  178.26    1.27
  -3  12   2  143.47    1.50
  -3  15   7   -0.53    1.20
  -7   4  10   72.63    0.90
  -7   4  12   76.41    1.08
  -7   6  14  209.04    1.78
  -7   8   8   29.07    1.01
  -7   8  14   15.38    1.18
  -7   9  13   21.17    1.13
  -6   8   5  436.66    2.01
  -6  10   6   26.17    1.08
  -6  10  15    1.28    0.99
  -6  11  14   66.40    1.48
  -6  12  12   55.89    1.55
  -5   8   3  138.50    1.14
  -2  16   8   80.98    1.44
  -1  16   5   22.11    1.11
  -7   5   8  131.62    1.12
  -7   9   8  356.71    2.29
  -7  10  10  328.59    2.33
  -3  14   4   33.24    1.30
  -2  15   4   17.65    1.20
  -7   4   9    5.98    0.55
  -7  10   9   17.90    1.18
  -7  10  13   11.61    1.30
  -6   9   5  198.52    1.57
  -6  12  13    8.50    1.21
  -5  12  15   10.29    0.91
  -4  14   6  142.00    1.74
  -3  11   1   11.65    0.73
  -7   6   7   32.43    0.79
  -7   7  15   47.78    1.29
  -4  13   4   20.63    1.27
  -7  10   8    7.27    1.10
  -7  11  10    1.72    1.37
  -6  11   6   45.72    1.26
  -6  11  15    6.42    0.99
  -5  14   9   36.12    1.29
  -5  14  11   18.92    1.19
  -4  15  10   -0.07    1.02
  -2  13   1   12.69    1.03
  -2  14   2    0.20    1.02
  -7   9  15   71.33    1.47
  -7  10  14   26.27    1.23
  -7  11  12  115.24    1.68
  -6  10   5   99.32    1.36
  -6  10  16   35.76    1.12
  -6  12   7    0.37    1.13
  -5  14   8    8.30    1.34
  -5  14  12    3.82    1.12
  -4  11   2  129.49    1.34
  -3  15   5   38.61    1.32
  -8   7  11   22.03    1.16
  -8   7  12    3.67    1.07
  -7  11   9   89.04    1.59
  -6   7   4    4.09    0.59
  -6   8   4    3.31    0.67
  -6  13  12    1.86    1.10
  -4  14   5   10.44    1.12
  -3  13   2    7.02    1.04
  -8   6  11   11.54    0.98
  -8   7  10    5.67    0.92
  -8   8  11   14.54    1.07
  -8   8  12   31.05    1.15
  -7   7   6  207.01    1.47
  -7  10   7   29.44    1.18
  -3  16   8   -1.73    0.94
  -2  15   3    1.40    1.05
  -2  16   5   61.73    1.28
  -8   6  10  314.08    1.89
  -8   8  13    2.89    1.15
  -8   9  12    6.38    1.26
  -7   6   6   66.60    0.92
  -7  10  15  131.97    1.62
  -7  11   8   45.19    1.36
  -7  11  14    3.02    1.10
  -6  12   6    0.31    1.29
  -6  13   8    2.43    1.16
  -6  13  13   20.48    1.12
  -5  12   4   12.35    1.03
  -5  13   5    6.65    1.08
  -3  10   0    8.91    0.65
  -3  16   7   80.43    1.45
  -8   5  11   36.01    1.01
  -8   5  12   17.28    0.94
  -8   6  13    5.56    0.92
  -8   8   9    6.54    0.98
  -8   9  10    6.30    1.07
  -7   9   6  170.14    1.60
  -7  12  10  139.74    1.82
  -7  12  12    3.60    1.08
  -6  12  15   47.02    1.12
  -4  13   3  140.01    1.67
  -8   5  10   17.64    0.87
  -8   6   9   16.67    0.84
  -8   7  14   20.84    1.20
  -8   8  14   56.92    1.38
  -8  10  11    1.79    1.32
  -7   9  16   27.38    1.09
  -7  12  13   14.18    1.23
  -4  14   4   91.13    1.58
  -4  15   6    7.63    1.12
  -3  15   4   10.49    1.05
  -8   5  13   76.47    1.24
  -8   6  14   73.99    1.34
  -8   9  14    0.11    1.17
  -8  10  10   20.91    1.23
  -7  10   6   24.62    1.12
  -7  11   7   32.66    1.28
  -6  14  11    4.58    1.13
  -5  15   9    4.68    1.15
  -5  15  10    3.07    1.02
  -3  16   6    1.63    1.09
  -8   5   9   68.96    0.98
  -8   7   8    1.60    0.82
  -8  10  13   40.11    1.27
  -7  11  15    1.43    0.92
  -7  12   8    4.93    1.19
  -6  14   9    2.86    1.12
  -6  14  12   56.83    1.35
  -3  11   0  134.74    1.31
  -8   4  11   57.76    1.03
  -8   4  12  701.06    2.58
  -8   8  15    1.85    1.11
  -8  10   9   80.95    1.52
  -7  10  16    1.84    0.83
  -7  12  14    4.16    0.98
  -4  15   5   95.46    1.61
  -8   4  10    3.07    0.68
  -8  10  14   37.37    1.28
  -8  11  10   15.12    1.25
  -8  11  11   25.64    1.32
  -8  11  12   23.45    1.23
  -7   6   5    2.94    0.59
  -7  13  10   20.10    1.22
  -7  13  11    0.21    1.08
  -7  13  12    6.35    1.10
  -6  14   8    2.12    1.08
  -4  11   1   12.44    0.77
  -4  16   8   20.34    1.06
  -3  14   2   88.16    1.42
  -8   5   8   18.00    0.73
  -8   7   7  110.92    1.29
  -8   8   7   61.20    1.20
  -8   9  15    7.55    1.03
  -8  10   8  223.52    2.03
  -7  13   9   11.58    1.21
  -5  14   5   43.35    1.30
  -5  15   7    8.87    1.14
  -3  15   3    1.18    1.08
  -8   4   9    1.03    0.67
  -8  11   9    3.51    1.20
  -7  10   5    6.42    0.99
  -7  13  13    0.42    0.99
  -4  13   2   22.18    1.18
  -4  14   3    3.78    1.16
  -4  16   7    4.80    0.99
  -8   6   7    5.79    0.73
  -8  10  15    5.49    1.02
  -8  11  14   22.78    1.19
  -8  12  11   75.72    1.68
  -7  13   8   19.84    1.27
  -9   7  11    4.69    0.98
  -9   7  12   14.13    1.06
  -9   8  11   82.32    1.45
  -9   8  12  111.94    1.57
  -9   8  13   20.45    1.27
  -8  12  10   57.25    1.48
  -8  12  12  150.38    1.79
  -7  12   6  138.73    1.93
  -6  12   4    6.90    1.06
  -4   9   0  115.93    1.05
  -4  15   4    1.79    1.14
  -9   6  11  101.15    1.45
  -9   6  12   34.56    1.16
  -9   7  10  196.37    1.78
  -9   7  13   22.53    1.07
  -9   9  12   41.49    1.32
  -9   9  13  143.75    1.87
  -8   3  11  117.00    1.18
  -8   4   8  134.84    1.21
  -8   9  16   25.98    1.12
  -8  12   9  106.69    1.87
  -7   7   4   19.34    0.75
  -7  11   5   22.48    1.18
  -7  14  11  130.05    1.71
  -6  15  10   21.13    1.08
  -5  13   3    1.03    1.11
  -4  12   1  309.47    2.02
  -9   6  10    0.36    0.99
  -9   8  14    3.62    1.14
  -9  10  11  127.65    1.90
  -8   3  10   31.21    0.80
  -8   8   6  178.20    1.61
  -8  11  15   87.06    1.43
  -7   9   4  345.33    2.04
  -7  14  10   14.79    1.22
  -7  14  12   50.32    1.32
  -5  14   4    0.15    1.06
  -3  10  -1   97.15    1.08
  -9   8   9  114.48    1.55
  -9   9   9  221.19    2.14
  -9   9  14   23.03    1.32
  -9  10  10    3.03    1.38
  -9  10  13    4.86    1.25
  -8   6   6  518.93    2.25
  -8  10  16   65.85    1.23
  -8  12  14   25.66    1.10
  -7   6   4    6.97    0.62
  -5  12   2   -1.03    1.02
  -5  16   8   34.56    1.20
  -9   5  11   77.97    1.18
  -9   6   9  145.01    1.56
  -9   6  14    0.34    1.08
  -8   3   9  188.46    1.30
  -8  10   6   38.70    1.44
  -8  12   8   66.57    1.55
  -8  13  11    5.31    1.24
  -8  13  12    3.57    1.18
  -4  16   5    3.41    1.05
  -9   5  10   14.37    0.84
  -9   8   8   92.96    1.59
  -9   8  15    6.13    1.14
  -9  10   9   85.41    1.59
  -9  10  14    4.05    1.20
  -9  11  11    2.16    1.20
  -9  11  12   11.36    1.34
  -6  13   4    2.02    1.26
[truncated: 1,101,582 more chars]
