# Supplementary material for: A Tail Does Not Always Make a Difference: Assembly of cds Nets from Co(NCS)2 and 1,4-bis(n-Alkyloxy)-2,5-bis(3,2′:6′,3″-terpyridin-4′-yl)benzene Ligands
Source: Molecules. 2022 Aug 5;27(15):4995. doi: 10.3390/molecules27154995 (PMC9370426; doi:10.3390/molecules27154995)
Supplement: Supplementary file 1 [file molecules-27-04995-s001.zip › CAS_116_2b_150K.cif]

data_cas_116_2_150k
_audit_creation_date               2022-05-12
_audit_creation_method
;
Olex2 1.5
(compiled 2022.04.07 svn.rca3783a0 for OlexSys, GUI svn.r6498)
;
_shelx_SHELXL_version_number       '2018/3'
loop_
  _audit_author_name
  _audit_author_email
  _audit_author_address
 'Capomolla, S.' simona.capomolla@unibas.ch
;
University of Basel
Department of Chemistry
Mattenstrasse 24a
Basel
Switzerland
;
 'Prescimone, A.' alessandro.prescimone@unibas.ch
;
University of Basel
Department of Chemistry
Mattenstrasse 24a
Basel
Switzerland
;

_audit_contact_author_address      ?
_audit_contact_author_email        ?
_audit_contact_author_name         ''
_audit_contact_author_phone        ?
_publ_contact_author_id_orcid      ?
_publ_section_references
;
Dolomanov, O.V., Bourhis, L.J., Gildea, R.J, Howard, J.A.K. & Puschmann, H.
 (2009), J. Appl. Cryst. 42, 339-341.

Sheldrick, G.M. (2015). Acta Cryst. C71, 3-8.
;
_chemical_name_common              ?
_chemical_name_systematic          ?
_chemical_formula_moiety          
 'C52 H52 Co N8 O2 S2, 1.8(C6 H4 Cl2), 1.3[C6H4Cl2]'
_chemical_formula_sum              'C70.60 H64.40 Cl6.20 Co N8 O2 S2'
_chemical_formula_weight           1399.74
_chemical_melting_point            ?
loop_
  _atom_type_symbol
  _atom_type_description
  _atom_type_scat_dispersion_real
  _atom_type_scat_dispersion_imag
  _atom_type_scat_source
 'C' 'C' 0.0181 0.0091 'International Tables Vol C Tables 4.2.6.8 and 6.1.1.4'
 'Cl' 'Cl' 0.3639 0.7018 'International Tables Vol C Tables 4.2.6.8 and 6.1.1.4'
 'Co' 'Co' -2.3653 3.6143
 'International Tables Vol C Tables 4.2.6.8 and 6.1.1.4'
 'H' 'H' 0.0000 0.0000 'International Tables Vol C Tables 4.2.6.8 and 6.1.1.4'
 'N' 'N' 0.0311 0.0180 'International Tables Vol C Tables 4.2.6.8 and 6.1.1.4'
 'O' 'O' 0.0492 0.0322 'International Tables Vol C Tables 4.2.6.8 and 6.1.1.4'
 'S' 'S' 0.3331 0.5567 'International Tables Vol C Tables 4.2.6.8 and 6.1.1.4'

_shelx_space_group_comment
;
The symmetry employed for this shelxl refinement is uniquely defined
by the following loop, which should always be used as a source of
symmetry information in preference to the above space-group names.
They are only intended as comments.
;
_space_group_crystal_system        'monoclinic'
_space_group_IT_number             14
_space_group_name_H-M_alt          'P 1 21/n 1'
_space_group_name_Hall             '-P 2yn'
loop_
  _space_group_symop_operation_xyz
 'x, y, z'
 '-x+1/2, y+1/2, -z+1/2'
 '-x, -y, -z'
 'x-1/2, -y-1/2, z-1/2'

_cell_length_a                     15.2267(4)
_cell_length_b                     14.6023(3)
_cell_length_c                     16.9263(5)
_cell_angle_alpha                  90
_cell_angle_beta                   114.392(2)
_cell_angle_gamma                  90
_cell_volume                       3427.55(16)
_cell_formula_units_Z              2
_cell_measurement_reflns_used      55216
_cell_measurement_temperature      150
_cell_measurement_theta_max        73.07
_cell_measurement_theta_min        3.29
_shelx_estimated_absorpt_T_max     0.512
_shelx_estimated_absorpt_T_min     0.359
_exptl_absorpt_coefficient_mu      5.159
_exptl_absorpt_correction_T_max    0.1429
_exptl_absorpt_correction_T_min    0.0946
_exptl_absorpt_correction_type     multi-scan
_exptl_absorpt_process_details
;
STOE X-Red32, absorption correction by Gaussian integration, analogous to
P. Coppens in: F. R. Ahmed (Editor), "Crystallographic Computing", Munksgaard,
Copenhagen (1970), 255 - 270. Afterwards scaling of reflection intensities was
performed within STOE LANA. J. Koziskova, F. Hahn, J. Richter, J. Kozisek, Acta
Chimica Slovaca, vol. 9, no. 2, 2016, pp. 136 - 140.
Finally a spherical absorption correction was done within STOE LANA.
;
_exptl_absorpt_special_details     ?
_exptl_crystal_colour              pink
_exptl_crystal_colour_primary      pink
_exptl_crystal_density_diffrn      1.356
_exptl_crystal_density_meas        ?
_exptl_crystal_density_method      'not measured'
_exptl_crystal_description         block
_exptl_crystal_F_000               1449
loop_
  _exptl_crystal_face_index_h
  _exptl_crystal_face_index_k
  _exptl_crystal_face_index_l
  _exptl_crystal_face_perp_dist
 1 -5 30 0.0766
 14 5 -15 0.0880
 -12 17 30 0.0782
 8 -17 30 0.1266
 -30 1 -21 0.1104
 3 19 30 0.1013
 0 0 -1 0.0587
 6 1 3 0.1069
 -23 -13 30 0.0826
 4 -5 -10 0.0798

_exptl_crystal_recrystallization_method 
 'The material was recrystallised from a mixture of methanol and Dichlorobenzene  by solvent layering'
_exptl_crystal_size_max            0.25
_exptl_crystal_size_mid            0.183
_exptl_crystal_size_min            0.15
_exptl_crystal_size_rad            0.180
_exptl_transmission_factor_max     ?
_exptl_transmission_factor_min     ?
_diffrn_reflns_av_R_equivalents    0.0307
_diffrn_reflns_av_unetI/netI       0.0196
_diffrn_reflns_Laue_measured_fraction_full  0.992
_diffrn_reflns_Laue_measured_fraction_max  0.974
_diffrn_reflns_limit_h_max         17
_diffrn_reflns_limit_h_min         -18
_diffrn_reflns_limit_k_max         17
_diffrn_reflns_limit_k_min         -18
_diffrn_reflns_limit_l_max         20
_diffrn_reflns_limit_l_min         -9
_diffrn_reflns_number              28723
_diffrn_reflns_point_group_measured_fraction_full  0.992
_diffrn_reflns_point_group_measured_fraction_max  0.974
_diffrn_reflns_theta_full          67.686
_diffrn_reflns_theta_max           72.869
_diffrn_reflns_theta_min           3.291
_diffrn_ambient_temperature        150
_diffrn_detector                   'EIGER2 1M'
_diffrn_detector_area_resol_mean   13.33
_diffrn_detector_type              ?
_diffrn_measured_fraction_theta_full  0.992
_diffrn_measured_fraction_theta_max  0.974
_diffrn_measurement_details
;
 2005 frames, detector distance = 40 mm
;
_diffrn_measurement_device         'Eulerian 4-circle diffractometer'
_diffrn_measurement_device_type    'STOE STADIVARI Cu'
_diffrn_measurement_method         'rotation method, \w scans'
_diffrn_radiation_collimation      '1.2 0.6 mm diameter'
_diffrn_radiation_monochromator    'Graded multilayer mirror'
_diffrn_radiation_polarisn_norm    270
_diffrn_radiation_probe            x-ray
_diffrn_radiation_type             'Cu K\a'
_diffrn_radiation_wavelength       1.54186
_diffrn_source                     'Axo Cu'
_diffrn_source_current             1.00
_diffrn_source_power               0.050
_diffrn_source_voltage             50
_reflns_Friedel_coverage           0.000
_reflns_Friedel_fraction_full      .
_reflns_Friedel_fraction_max       .
_reflns_number_gt                  6173
_reflns_number_total               6654
_reflns_special_details
;
 Reflections were merged by SHELXL according to the crystal
 class for the calculation of statistics and refinement.
 
 Structure factors included contributions from the .fab file.
 
 _reflns_Friedel_fraction is defined as the number of unique
 Friedel pairs measured divided by the number that would be
 possible theoretically, ignoring centric projections and
 systematic absences.
;
_reflns_threshold_expression       'I > 2\s(I)'
_computing_cell_refinement         'X-Area Recipe 1.37.0.0 (STOE, 2021)'
_computing_data_collection         'X-Area Pilatus3_SV 1.31.175.0 (STOE, 2021)'
_computing_data_reduction
;
X-Area Integrate 2.5.1.0 (STOE, 2021)
X-Area LANA 2.6.2.0 (STOE, 2021)
;
_computing_molecular_graphics      'Olex2 1.5 (Dolomanov et al., 2009)'
_computing_publication_material    'Olex2 1.5 (Dolomanov et al., 2009)'
_computing_structure_refinement    'SHELXL 2018/3 (Sheldrick, 2015)'
_computing_structure_solution      'olex2.solve 1.5 (Bourhis et al., 2015)'
_refine_diff_density_max           1.826
_refine_diff_density_min           -0.991
_refine_diff_density_rms           0.100
_refine_ls_extinction_coef         0.00095(19)
_refine_ls_extinction_expression  
 'Fc^*^=kFc[1+0.001xFc^2^\l^3^/sin(2\q)]^-1/4^'
_refine_ls_extinction_method       'SHELXL-2018/3 (Sheldrick 2018)'
_refine_ls_goodness_of_fit_ref     1.024
_refine_ls_hydrogen_treatment      constr
_refine_ls_matrix_type             full
_refine_ls_number_parameters       390
_refine_ls_number_reflns           6654
_refine_ls_number_restraints       422
_refine_ls_R_factor_all            0.1033
_refine_ls_R_factor_gt             0.0985
_refine_ls_restrained_S_all        1.012
_refine_ls_shift/su_max            0.000
_refine_ls_shift/su_mean           0.000
_refine_ls_structure_factor_coef   Fsqd
_refine_ls_weighting_details      
 'w=1/[\s^2^(Fo^2^)+(0.1000P)^2^+12.0000P] where P=(Fo^2^+2Fc^2^)/3'
_refine_ls_weighting_scheme        calc
_refine_ls_wR_factor_gt            0.2408
_refine_ls_wR_factor_ref           0.2452
_refine_special_details
;
the aliphatic side chain is orientationally disordered SADI and RIGU .
The solvent molecule is disordered over 2 orientations. AFIX66 and EADP had to be used to treat it.
the solvent mask has been used to treat the remaining solvent region.
;
_olex2_refinement_description
;
1. Fixed Uiso
 At 1.2 times of:
  All C(H) groups, All C(H,H) groups, All C(H,H,H,H) groups
 At 1.5 times of:
  All C(H,H,H) groups
2. Restrained distances
 C26-C28
 2.4 with sigma of 0.04
 Cl4-C38 \\sim Cl1-C37
 with sigma of 0.02
 C19-C20 \\sim C21-C20 \\sim C22-C21 \\sim C24-C23 \\sim C24-C25
 with sigma of 0.02
 C24-C25 \\sim C24-C23 \\sim C22-C23 \\sim C22-C21 \\sim C21-C20 \\sim C19-C20
 with sigma of 0.02
 C29-C28 \\sim C28-C27 \\sim C26-C27 \\sim C26-C21
 with sigma of 0.02
 C29-C28 \\sim C25-C24 \\sim C24-C23 \\sim C28-C27 \\sim C23-C22 \\sim C27-C26
\\sim C22-C21 \\sim C26-C21
 \\sim C20-C19 \\sim C21-C20
 with sigma of 0.02
3. Uiso/Uaniso restraints and constraints
C19 \\sim C20 \\sim C21 \\sim C25 \\sim C23 \\sim C22 \\sim C24 \\sim C28 \\sim
C27 \\sim C29 \\sim C26: within 2A with sigma of 0.04 and sigma for terminal
atoms of 0.08 within 2A
C38 \\sim C37 \\sim C42 \\sim C41 \\sim C40 \\sim C39 \\sim C33 \\sim C34 \\sim
C35 \\sim C36 \\sim C31: within 2A with sigma of 0.04 and sigma for terminal
atoms of 0.08 within 2A
C32 \\sim C31 \\sim C35 \\sim C34 \\sim C33 \\sim C36: within 2A with sigma of
0.04 and sigma for terminal atoms of 0.08 within 2A
Uanis(C40) = Uanis(C39) = Uanis(C38) = Uanis(C37) = Uanis(C42) = Uanis(C41)
Uanis(C31) = Uanis(C33) = Uanis(C34) = Uanis(C35) = Uanis(C36)
Uanis(Cl1) = Uanis(Cl3) = Uanis(Cl4) = Uanis(Cl2)
4. Rigid body (RIGU) restrains
 C19, C20, C21, C25, C23, C22, C24, C28, C27, C29, C26
 with sigma for 1-2 distances of 0.004 and sigma for 1-3 distances of 0.004
 C38, C37, C42, C41, C40, C39, C33, C34, C35, C36, C31
 with sigma for 1-2 distances of 0.004 and sigma for 1-3 distances of 0.004
 C32, C33, C34, C35, C36, C31
 with sigma for 1-2 distances of 0.004 and sigma for 1-3 distances of 0.004
5. Others
 Fixed Sof: S2(0.8) Cl1(0.5) Cl4(0.5) H21A(0.5) H21B(0.5) H21C(0.5) H21D(0.5)
 C25(0.5) H25A(0.5) H25B(0.5) H25C(0.5) C23(0.5) H23A(0.5) H23B(0.5) C22(0.5)
 H22A(0.5) H22B(0.5) C24(0.5) H24A(0.5) H24B(0.5) C38(0.5) C37(0.5) C42(0.5)
 H42(0.5) C41(0.5) H41(0.5) C40(0.5) H40(0.5) C39(0.5) H39(0.5) S1(0.2)
 C28(0.5) H28A(0.5) H28B(0.5) C27(0.5) H27A(0.5) H27B(0.5) C29(0.5) H29A(0.5)
 H29B(0.5) H29C(0.5) C26(0.5) H26A(0.5) H26B(0.5) Cl2(0.4) Cl3(0.4) C31(0.4)
 C32(0.4) C33(0.4) H33(0.4) C34(0.4) H34(0.4) C35(0.4) H35(0.4) C36(0.4)
 H36(0.4)
6.a Riding coordinates:
 C25(H25A,H25B,H25C)
6.b Secondary CH2 refined with riding coordinates:
 C19(H19A,H19B), C20(H20A,H20B), C21(H21A,H21B), C21(H21C,H21D), C23(H23A,
 H23B), C22(H22A,H22B), C24(H24A,H24B), C28(H28A,H28B), C27(H27A,H27B),
 C26(H26A,H26B)
6.c Aromatic/amide H refined with riding coordinates:
 C1(H1), C12(H12), C9(H9), C7(H7), C17(H17), C5(H5), C3(H3), C15(H15),
 C13(H13), C14(H14), C2(H2), C42(H42), C41(H41), C40(H40), C39(H39), C33(H33),
 C34(H34), C35(H35), C36(H36)
6.d Fitted hexagon refined as free rotating group:
 C38(C37,C42,C41,C40,C39), C31(C32,C33,C34,C35,C36)
6.e Idealised Me refined as rotating group:
 C29(H29A,H29B,H29C)
;
_atom_sites_solution_hydrogens     mixed
_atom_sites_solution_primary       iterative
_atom_sites_solution_secondary     ?
loop_
  _atom_site_label
  _atom_site_type_symbol
  _atom_site_fract_x
  _atom_site_fract_y
  _atom_site_fract_z
  _atom_site_U_iso_or_equiv
  _atom_site_adp_type
  _atom_site_occupancy
  _atom_site_site_symmetry_order
  _atom_site_calc_flag
  _atom_site_refinement_flags_posn
  _atom_site_refinement_flags_adp
  _atom_site_refinement_flags_occupancy
  _atom_site_disorder_assembly
  _atom_site_disorder_group
 Co1 Co 0.500000 0.500000 1.000000 0.0282(3) Uani 1 2 d S . P . .
 S2 S 0.4263(2) 0.3517(2) 0.73211(17) 0.0828(9) Uani 0.8 1 d . . P A 1
 N2 N 0.3025(2) 0.7478(2) 0.6284(2) 0.0344(7) Uani 1 1 d . . . . .
 N1 N 0.4112(2) 0.6014(2) 0.9065(2) 0.0336(7) Uani 1 1 d . . . . .
 N3 N 0.1267(2) 0.9532(2) 0.4739(2) 0.0305(7) Uani 1 1 d . . . . .
 O1 O 0.5367(3) 0.6863(2) 0.5059(2) 0.0518(9) Uani 1 1 d . . . . .
 N4 N 0.4659(2) 0.4064(2) 0.9008(2) 0.0355(7) Uani 1 1 d . . . . .
 C1 C 0.3550(3) 0.6578(3) 0.9269(3) 0.0417(10) Uani 1 1 d . . . . .
 H1 H 0.357531 0.655196 0.982734 0.050 Uiso 1 1 calc R U . . .
 C12 C 0.1760(3) 0.8793(3) 0.5151(3) 0.0320(8) Uani 1 1 d . . . . .
 H12 H 0.158686 0.851362 0.555968 0.038 Uiso 1 1 calc R U . . .
 C10 C 0.3049(3) 0.7606(3) 0.5506(3) 0.0340(8) Uani 1 1 d . . . . .
 C9 C 0.3543(3) 0.7029(3) 0.5186(3) 0.0378(9) Uani 1 1 d . . . . .
 H9 H 0.355330 0.714527 0.464977 0.045 Uiso 1 1 calc R U . . .
 C4 C 0.3485(3) 0.6684(3) 0.7632(3) 0.0353(9) Uani 1 1 d . . . . .
 C7 C 0.3982(3) 0.6129(3) 0.6465(3) 0.0392(9) Uani 1 1 d . . . . .
 H7 H 0.427721 0.561993 0.679978 0.047 Uiso 1 1 calc R U . . .
 C17 C 0.4360(3) 0.4689(3) 0.5327(3) 0.0423(10) Uani 1 1 d . . . . .
 H17 H 0.393276 0.447682 0.555057 0.051 Uiso 1 1 calc R U . . .
 C5 C 0.4075(3) 0.6076(3) 0.8259(3) 0.0333(8) Uani 1 1 d . . . . .
 H5 H 0.446805 0.568824 0.811102 0.040 Uiso 1 1 calc R U . . .
 C6 C 0.3495(3) 0.6755(3) 0.6761(3) 0.0347(8) Uani 1 1 d . . . . .
 C18 C 0.5193(3) 0.5936(3) 0.5007(3) 0.0427(10) Uani 1 1 d . . . . .
 C16 C 0.4538(3) 0.5623(3) 0.5334(3) 0.0390(9) Uani 1 1 d . . . . .
 C11 C 0.2522(3) 0.8417(3) 0.5005(3) 0.0340(8) Uani 1 1 d . . . . .
 C3 C 0.2902(4) 0.7251(3) 0.7866(3) 0.0503(12) Uani 1 1 d . . . . .
 H3 H 0.249010 0.766578 0.746849 0.060 Uiso 1 1 calc R U . . .
 C8 C 0.4027(3) 0.6266(3) 0.5673(3) 0.0389(9) Uani 1 1 d . . . . .
 C15 C 0.1525(3) 0.9931(3) 0.4151(3) 0.0368(9) Uani 1 1 d . . . . .
 H15 H 0.118919 1.044800 0.386121 0.044 Uiso 1 1 calc R U . . .
 C13 C 0.2764(3) 0.8835(3) 0.4385(3) 0.0431(10) Uani 1 1 d . . . . .
 H13 H 0.325635 0.859841 0.425584 0.052 Uiso 1 1 calc R U . . .
 C19 C 0.6147(4) 0.7195(3) 0.4880(4) 0.0499(11) Uani 1 1 d D U . . .
 H19A H 0.599041 0.714114 0.426539 0.060 Uiso 1 1 calc R U . . .
 H19B H 0.672373 0.683845 0.519719 0.060 Uiso 1 1 calc R U . . .
 C14 C 0.2264(3) 0.9608(3) 0.3960(3) 0.0431(10) Uani 1 1 d . . . . .
 H14 H 0.242480 0.990419 0.355162 0.052 Uiso 1 1 calc R U . . .
 Cl1 Cl 0.5664(5) 0.7973(5) 0.7916(5) 0.1460(13) Uani 0.5 1 d D . P B 1
 C2 C 0.2937(4) 0.7195(4) 0.8694(3) 0.0548(13) Uani 1 1 d . . . . .
 H2 H 0.254917 0.757201 0.885938 0.066 Uiso 1 1 calc R U . . .
 Cl4 Cl 0.7291(5) 0.9468(5) 0.8223(5) 0.1460(13) Uani 0.5 1 d D . P B 1
 C20 C 0.6318(4) 0.8179(3) 0.5152(4) 0.0619(14) Uani 1 1 d D U . . .
 H20A H 0.654454 0.820019 0.577802 0.074 Uiso 1 1 calc R U . . .
 H20B H 0.683838 0.840254 0.501438 0.074 Uiso 1 1 calc R U . . .
 C21 C 0.5508(4) 0.8822(4) 0.4779(5) 0.0810(17) Uani 1 1 d D U . . .
 H21A H 0.567737 0.940053 0.508676 0.097 Uiso 0.5 1 calc R U P C 1
 H21B H 0.494885 0.857713 0.484302 0.097 Uiso 0.5 1 calc R U P C 1
 H21C H 0.506666 0.869664 0.504617 0.097 Uiso 0.5 1 calc R U P D 2
 H21D H 0.576132 0.943339 0.495713 0.097 Uiso 0.5 1 calc R U P D 2
 C25 C 0.6527(13) 1.0204(12) 0.2495(10) 0.084(4) Uani 0.5 1 d D U P E 1
 H25A H 0.654134 1.082085 0.269713 0.126 Uiso 0.5 1 d R U P E 1
 H25B H 0.714584 0.992445 0.280233 0.126 Uiso 0.5 1 d R U P E 1
 H25C H 0.637544 1.021145 0.188523 0.126 Uiso 0.5 1 d R U P E 1
 C23 C 0.5896(16) 0.9579(14) 0.3583(11) 0.097(5) Uani 0.5 1 d D U P E 1
 H23A H 0.655612 0.938282 0.391348 0.117 Uiso 0.5 1 calc R U P E 1
 H23B H 0.584294 1.019028 0.378296 0.117 Uiso 0.5 1 calc R U P E 1
 C22 C 0.5273(14) 0.897(2) 0.3847(9) 0.106(5) Uani 0.5 1 d D U P E 1
 H22A H 0.462307 0.921544 0.358176 0.127 Uiso 0.5 1 calc R U P E 1
 H22B H 0.525815 0.837613 0.358821 0.127 Uiso 0.5 1 calc R U P E 1
 C24 C 0.5761(12) 0.9670(10) 0.2646(9) 0.093(4) Uani 0.5 1 d D U P E 1
 H24A H 0.573145 0.905955 0.240968 0.112 Uiso 0.5 1 calc R U P E 1
 H24B H 0.514312 0.996041 0.231996 0.112 Uiso 0.5 1 calc R U P E 1
 C38 C 0.7366(9) 0.8412(7) 0.7743(7) 0.106(2) Uani 0.5 1 d DG U P B 1
 C37 C 0.6664(6) 0.7738(9) 0.7550(7) 0.106(2) Uani 0.5 1 d DG U P B 1
 C42 C 0.6803(7) 0.6888(8) 0.7249(7) 0.106(2) Uani 0.5 1 d G U P B 1
 H42 H 0.633268 0.643663 0.711991 0.127 Uiso 0.5 1 calc R U P B 1
 C41 C 0.7644(9) 0.6713(7) 0.7141(7) 0.106(2) Uani 0.5 1 d G U P B 1
 H41 H 0.773644 0.614453 0.693968 0.127 Uiso 0.5 1 calc R U P B 1
 C40 C 0.8346(7) 0.7388(9) 0.7334(7) 0.106(2) Uani 0.5 1 d G U P B 1
 H40 H 0.890869 0.727041 0.726184 0.127 Uiso 0.5 1 calc R U P B 1
 C39 C 0.8207(7) 0.8237(8) 0.7635(8) 0.106(2) Uani 0.5 1 d G U P B 1
 H39 H 0.867718 0.868841 0.776424 0.127 Uiso 0.5 1 calc R U P B 1
 C30 C 0.4504(3) 0.3784(3) 0.8327(3) 0.0474(11) Uani 1 1 d . . . . .
 S1 S 0.4558(8) 0.2999(9) 0.7634(8) 0.081(3) Uani 0.2 1 d . . P A 2
 C28 C 0.5949(18) 1.0018(13) 0.3510(14) 0.106(6) Uani 0.5 1 d D U P E 2
 H28A H 0.641014 1.004870 0.411163 0.127 Uiso 0.5 1 calc R U P E 2
 H28B H 0.545931 1.047938 0.342246 0.127 Uiso 0.5 1 calc R U P E 2
 C27 C 0.5486(14) 0.9095(12) 0.3337(13) 0.104(4) Uani 0.5 1 d D U P E 2
 H27A H 0.505168 0.906282 0.272730 0.125 Uiso 0.5 1 calc R U P E 2
 H27B H 0.598563 0.863972 0.343993 0.125 Uiso 0.5 1 calc R U P E 2
 C29 C 0.6466(17) 1.0234(15) 0.2926(15) 0.113(6) Uani 0.5 1 d D U P E 2
 H29A H 0.640813 0.972126 0.255186 0.170 Uiso 0.5 1 calc R U P E 2
 H29B H 0.713577 1.035084 0.327761 0.170 Uiso 0.5 1 calc R U P E 2
 H29C H 0.617963 1.076440 0.258054 0.170 Uiso 0.5 1 calc R U P E 2
 C26 C 0.4945(12) 0.8842(16) 0.3846(8) 0.087(4) Uani 0.5 1 d D U P E 2
 H26A H 0.441956 0.927315 0.371748 0.104 Uiso 0.5 1 calc R U P E 2
 H26B H 0.466376 0.824125 0.365952 0.104 Uiso 0.5 1 calc R U P E 2
 Cl2 Cl 0.7226(6) 0.6626(6) 0.7150(6) 0.1460(13) Uani 0.4 1 d . . P F 2
 Cl3 Cl 0.5783(6) 0.7494(6) 0.7613(6) 0.1460(13) Uani 0.4 1 d . . P F 2
 C31 C 0.6720(8) 0.8123(11) 0.7856(8) 0.102(3) Uani 0.4 1 d G U P F 2
 C32 C 0.7317(11) 0.7641(7) 0.7565(8) 0.092(4) Uani 0.4 1 d G U P F 2
 C33 C 0.8173(10) 0.8032(10) 0.7621(8) 0.102(3) Uani 0.4 1 d G U P F 2
 H33 H 0.857208 0.770930 0.742609 0.123 Uiso 0.4 1 calc R U P F 2
 C34 C 0.8433(9) 0.8904(10) 0.7968(8) 0.102(3) Uani 0.4 1 d G U P F 2
 H34 H 0.900615 0.916495 0.800589 0.123 Uiso 0.4 1 calc R U P F 2
 C35 C 0.7837(12) 0.9386(8) 0.8260(8) 0.102(3) Uani 0.4 1 d G U P F 2
 H35 H 0.801084 0.996904 0.849198 0.123 Uiso 0.4 1 calc R U P F 2
 C36 C 0.6980(10) 0.8995(11) 0.8203(8) 0.102(3) Uani 0.4 1 d G U P F 2
 H36 H 0.658145 0.931748 0.839828 0.123 Uiso 0.4 1 calc R U P F 2

loop_
  _atom_site_aniso_label
  _atom_site_aniso_U_11
  _atom_site_aniso_U_22
  _atom_site_aniso_U_33
  _atom_site_aniso_U_23
  _atom_site_aniso_U_13
  _atom_site_aniso_U_12
 Co1 0.0308(5) 0.0246(4) 0.0325(5) -0.0019(3) 0.0164(4) -0.0042(3)
 S2 0.113(2) 0.0955(19) 0.0577(14) -0.0367(12) 0.0527(14) -0.0515(17)
 N2 0.0368(17) 0.0331(17) 0.0398(18) 0.0056(14) 0.0223(14) 0.0085(14)
 N1 0.0361(17) 0.0312(16) 0.0386(18) 0.0027(13) 0.0204(14) 0.0001(13)
 N3 0.0308(15) 0.0282(16) 0.0376(17) 0.0026(13) 0.0192(13) 0.0045(12)
 O1 0.067(2) 0.0317(15) 0.082(2) 0.0071(15) 0.0566(19) 0.0106(14)
 N4 0.0384(17) 0.0328(17) 0.0407(19) -0.0032(14) 0.0217(15) -0.0091(14)
 C1 0.051(2) 0.039(2) 0.048(2) 0.0044(18) 0.033(2) 0.0103(19)
 C12 0.0343(19) 0.0266(18) 0.041(2) 0.0033(15) 0.0217(16) 0.0087(15)
 C10 0.038(2) 0.0303(19) 0.041(2) 0.0046(16) 0.0239(17) 0.0080(16)
 C9 0.044(2) 0.038(2) 0.041(2) 0.0071(17) 0.0263(18) 0.0107(17)
 C4 0.040(2) 0.0316(19) 0.044(2) 0.0043(16) 0.0271(18) 0.0072(16)
 C7 0.047(2) 0.034(2) 0.048(2) 0.0120(17) 0.0308(19) 0.0158(18)
 C17 0.053(2) 0.036(2) 0.053(3) 0.0116(19) 0.037(2) 0.0159(19)
 C5 0.0348(19) 0.0337(19) 0.039(2) 0.0020(16) 0.0222(16) 0.0044(16)
 C6 0.037(2) 0.032(2) 0.042(2) 0.0044(16) 0.0234(17) 0.0091(16)
 C18 0.058(3) 0.031(2) 0.053(3) 0.0101(17) 0.037(2) 0.0154(19)
 C16 0.047(2) 0.036(2) 0.046(2) 0.0104(17) 0.0309(19) 0.0132(18)
 C11 0.0352(19) 0.0319(19) 0.041(2) 0.0041(16) 0.0219(17) 0.0059(16)
 C3 0.060(3) 0.051(3) 0.054(3) 0.017(2) 0.039(2) 0.028(2)
 C8 0.048(2) 0.036(2) 0.044(2) 0.0076(17) 0.0304(19) 0.0130(18)
 C15 0.037(2) 0.036(2) 0.043(2) 0.0063(16) 0.0226(19) 0.0067(16)
 C13 0.047(2) 0.044(2) 0.051(3) 0.0109(19) 0.033(2) 0.0147(19)
 C19 0.052(3) 0.047(2) 0.065(3) 0.001(2) 0.038(2) 0.005(2)
 C14 0.048(2) 0.041(2) 0.050(3) 0.0146(19) 0.031(2) 0.0134(19)
 Cl1 0.114(2) 0.150(3) 0.160(3) -0.012(2) 0.042(2) -0.023(2)
 C2 0.072(3) 0.058(3) 0.052(3) 0.012(2) 0.044(3) 0.027(3)
 Cl4 0.114(2) 0.150(3) 0.160(3) -0.012(2) 0.042(2) -0.023(2)
 C20 0.067(3) 0.045(3) 0.089(4) -0.006(3) 0.047(3) -0.002(2)
 C21 0.063(3) 0.060(3) 0.116(4) 0.005(3) 0.033(3) -0.001(3)
 C25 0.121(11) 0.065(8) 0.067(9) 0.004(8) 0.039(9) 0.005(8)
 C23 0.094(9) 0.093(12) 0.099(8) -0.030(8) 0.034(7) -0.042(9)
 C22 0.072(11) 0.125(13) 0.116(8) 0.003(9) 0.033(8) -0.013(9)
 C24 0.115(10) 0.057(7) 0.088(7) -0.012(6) 0.023(7) -0.028(7)
 C38 0.092(4) 0.143(6) 0.087(4) 0.053(4) 0.041(4) 0.042(4)
 C37 0.092(4) 0.143(6) 0.087(4) 0.053(4) 0.041(4) 0.042(4)
 C42 0.092(4) 0.143(6) 0.087(4) 0.053(4) 0.041(4) 0.042(4)
 C41 0.092(4) 0.143(6) 0.087(4) 0.053(4) 0.041(4) 0.042(4)
 C40 0.092(4) 0.143(6) 0.087(4) 0.053(4) 0.041(4) 0.042(4)
 C39 0.092(4) 0.143(6) 0.087(4) 0.053(4) 0.041(4) 0.042(4)
 C30 0.046(2) 0.052(3) 0.055(3) -0.017(2) 0.031(2) -0.022(2)
 S1 0.088(6) 0.103(8) 0.081(7) -0.059(6) 0.063(6) -0.038(6)
 C28 0.122(12) 0.099(12) 0.090(10) -0.022(9) 0.038(9) -0.047(10)
 C27 0.109(10) 0.105(10) 0.113(9) -0.028(9) 0.060(8) -0.035(8)
 C29 0.124(14) 0.096(12) 0.125(17) -0.012(13) 0.058(12) -0.026(11)
 C26 0.077(10) 0.086(10) 0.102(7) -0.017(7) 0.041(6) -0.015(8)
 Cl2 0.114(2) 0.150(3) 0.160(3) -0.012(2) 0.042(2) -0.023(2)
 Cl3 0.114(2) 0.150(3) 0.160(3) -0.012(2) 0.042(2) -0.023(2)
 C31 0.113(6) 0.109(6) 0.062(4) 0.037(4) 0.012(4) 0.007(5)
 C32 0.132(10) 0.055(8) 0.049(8) 0.018(6) -0.002(7) -0.001(7)
 C33 0.113(6) 0.109(6) 0.062(4) 0.037(4) 0.012(4) 0.007(5)
 C34 0.113(6) 0.109(6) 0.062(4) 0.037(4) 0.012(4) 0.007(5)
 C35 0.113(6) 0.109(6) 0.062(4) 0.037(4) 0.012(4) 0.007(5)
 C36 0.113(6) 0.109(6) 0.062(4) 0.037(4) 0.012(4) 0.007(5)

_geom_special_details
;
 All esds (except the esd in the dihedral angle between two l.s. planes)
 are estimated using the full covariance matrix.  The cell esds are taken
 into account individually in the estimation of esds in distances, angles
 and torsion angles; correlations between esds in cell parameters are only
 used when they are defined by crystal symmetry.  An approximate (isotropic)
 treatment of cell esds is used for estimating esds involving l.s. planes.
;
loop_
  _geom_bond_atom_site_label_1
  _geom_bond_atom_site_label_2
  _geom_bond_distance
  _geom_bond_site_symmetry_2
  _geom_bond_publ_flag
 Co1 N1 2.181(3) 3_667 ?
 Co1 N1 2.181(3) . ?
 Co1 N3 2.255(3) 4_676 ?
 Co1 N3 2.255(3) 2_546 ?
 Co1 N4 2.059(3) 3_667 ?
 Co1 N4 2.059(3) . ?
 S2 C30 1.634(5) . ?
 N2 C10 1.346(5) . ?
 N2 C6 1.341(5) . ?
 N1 C1 1.332(5) . ?
 N1 C5 1.346(5) . ?
 N3 C12 1.335(5) . ?
 N3 C15 1.344(5) . ?
 O1 C18 1.375(5) . ?
 O1 C19 1.427(5) . ?
 N4 C30 1.151(6) . ?
 C1 H1 0.9300 . ?
 C1 C2 1.372(6) . ?
 C12 H12 0.9300 . ?
 C12 C11 1.395(5) . ?
 C10 C9 1.381(5) . ?
 C10 C11 1.484(5) . ?
 C9 H9 0.9300 . ?
 C9 C8 1.400(6) . ?
 C4 C5 1.390(6) . ?
 C4 C6 1.484(5) . ?
 C4 C3 1.385(5) . ?
 C7 H7 0.9300 . ?
 C7 C6 1.395(5) . ?
 C7 C8 1.385(6) . ?
 C17 H17 0.9300 . ?
 C17 C18 1.391(6) 3_666 ?
 C17 C16 1.390(6) . ?
 C5 H5 0.9300 . ?
 C18 C16 1.402(6) . ?
 C16 C8 1.478(5) . ?
 C11 C13 1.389(6) . ?
 C3 H3 0.9300 . ?
 C3 C2 1.384(6) . ?
 C15 H15 0.9300 . ?
 C15 C14 1.376(6) . ?
 C13 H13 0.9300 . ?
 C13 C14 1.385(6) . ?
 C19 H19A 0.9700 . ?
 C19 H19B 0.9700 . ?
 C19 C20 1.497(6) . ?
 C14 H14 0.9300 . ?
 Cl1 C37 1.897(10) . ?
 C2 H2 0.9300 . ?
 Cl4 C38 1.769(11) . ?
 C20 H20A 0.9700 . ?
 C20 H20B 0.9700 . ?
 C20 C21 1.469(7) . ?
 C21 H21A 0.9700 . ?
 C21 H21B 0.9700 . ?
 C21 H21C 0.9700 . ?
 C21 H21D 0.9700 . ?
 C21 C22 1.483(13) . ?
 C21 C26 1.454(12) . ?
 C25 H25A 0.9599 . ?
 C25 H25B 0.9599 . ?
 C25 H25C 0.9601 . ?
 C25 C24 1.510(13) . ?
 C23 H23A 0.9700 . ?
 C23 H23B 0.9700 . ?
 C23 C22 1.493(13) . ?
 C23 C24 1.520(13) . ?
 C22 H22A 0.9700 . ?
 C22 H22B 0.9700 . ?
 C24 H24A 0.9700 . ?
 C24 H24B 0.9700 . ?
 C38 C37 1.3900 . ?
 C38 C39 1.3900 . ?
 C37 C42 1.3900 . ?
 C42 H42 0.9300 . ?
 C42 C41 1.3900 . ?
 C41 H41 0.9300 . ?
 C41 C40 1.3900 . ?
 C40 H40 0.9300 . ?
 C40 C39 1.3900 . ?
 C39 H39 0.9300 . ?
 C30 S1 1.665(9) . ?
 C28 H28A 0.9700 . ?
 C28 H28B 0.9700 . ?
 C28 C27 1.493(13) . ?
 C28 C29 1.531(14) . ?
 C27 H27A 0.9700 . ?
 C27 H27B 0.9700 . ?
 C27 C26 1.463(13) . ?
 C29 H29A 0.9600 . ?
 C29 H29B 0.9600 . ?
 C29 H29C 0.9600 . ?
 C26 H26A 0.9700 . ?
 C26 H26B 0.9700 . ?
 Cl2 C32 1.621(15) . ?
 Cl3 C31 1.601(14) . ?
 C31 C32 1.3900 . ?
 C31 C36 1.3900 . ?
 C32 C33 1.3900 . ?
 C33 H33 0.9300 . ?
 C33 C34 1.3900 . ?
 C34 H34 0.9300 . ?
 C34 C35 1.3900 . ?
 C35 H35 0.9300 . ?
 C35 C36 1.3900 . ?
 C36 H36 0.9300 . ?

loop_
  _geom_angle_atom_site_label_1
  _geom_angle_atom_site_label_2
  _geom_angle_atom_site_label_3
  _geom_angle
  _geom_angle_site_symmetry_1
  _geom_angle_site_symmetry_3
  _geom_angle_publ_flag
 N1 Co1 N1 180.0 3_667 . ?
 N1 Co1 N3 88.62(12) . 4_676 ?
 N1 Co1 N3 88.62(12) 3_667 2_546 ?
 N1 Co1 N3 91.38(12) . 2_546 ?
 N1 Co1 N3 91.38(12) 3_667 4_676 ?
 N3 Co1 N3 180.0 2_546 4_676 ?
 N4 Co1 N1 89.24(13) . . ?
 N4 Co1 N1 90.76(13) . 3_667 ?
 N4 Co1 N1 90.76(13) 3_667 . ?
 N4 Co1 N1 89.24(13) 3_667 3_667 ?
 N4 Co1 N3 90.61(12) . 2_546 ?
 N4 Co1 N3 90.61(12) 3_667 4_676 ?
 N4 Co1 N3 89.39(12) 3_667 2_546 ?
 N4 Co1 N3 89.39(12) . 4_676 ?
 N4 Co1 N4 180.0 3_667 . ?
 C6 N2 C10 118.4(3) . . ?
 C1 N1 Co1 120.2(3) . . ?
 C1 N1 C5 117.3(3) . . ?
 C5 N1 Co1 122.4(3) . . ?
 C12 N3 Co1 119.0(2) . 2_556 ?
 C12 N3 C15 117.6(3) . . ?
 C15 N3 Co1 123.3(3) . 2_556 ?
 C18 O1 C19 118.5(3) . . ?
 C30 N4 Co1 158.6(3) . . ?
 N1 C1 H1 118.5 . . ?
 N1 C1 C2 123.0(4) . . ?
 C2 C1 H1 118.5 . . ?
 N3 C12 H12 118.1 . . ?
 N3 C12 C11 123.7(4) . . ?
 C11 C12 H12 118.1 . . ?
 N2 C10 C9 122.6(4) . . ?
 N2 C10 C11 116.4(3) . . ?
 C9 C10 C11 121.1(4) . . ?
 C10 C9 H9 120.2 . . ?
 C10 C9 C8 119.6(4) . . ?
 C8 C9 H9 120.2 . . ?
 C5 C4 C6 122.3(3) . . ?
 C3 C4 C5 116.9(4) . . ?
 C3 C4 C6 120.8(4) . . ?
 C6 C7 H7 120.0 . . ?
 C8 C7 H7 120.0 . . ?
 C8 C7 C6 120.0(4) . . ?
 C18 C17 H17 119.3 3_666 . ?
 C16 C17 H17 119.3 . . ?
 C16 C17 C18 121.4(4) . 3_666 ?
 N1 C5 C4 124.1(3) . . ?
 N1 C5 H5 118.0 . . ?
 C4 C5 H5 118.0 . . ?
 N2 C6 C4 115.5(3) . . ?
 N2 C6 C7 122.0(4) . . ?
 C7 C6 C4 122.4(4) . . ?
 O1 C18 C17 123.9(4) . 3_666 ?
 O1 C18 C16 116.5(4) . . ?
 C17 C18 C16 119.6(4) 3_666 . ?
 C17 C16 C18 119.0(4) . . ?
 C17 C16 C8 119.7(4) . . ?
 C18 C16 C8 121.3(4) . . ?
 C12 C11 C10 120.4(3) . . ?
 C13 C11 C12 117.4(4) . . ?
 C13 C11 C10 122.2(3) . . ?
 C4 C3 H3 120.2 . . ?
 C2 C3 C4 119.6(4) . . ?
 C2 C3 H3 120.2 . . ?
 C9 C8 C16 120.7(4) . . ?
 C7 C8 C9 117.4(4) . . ?
 C7 C8 C16 121.9(4) . . ?
 N3 C15 H15 118.6 . . ?
 N3 C15 C14 122.9(4) . . ?
 C14 C15 H15 118.6 . . ?
 C11 C13 H13 120.3 . . ?
 C14 C13 C11 119.4(4) . . ?
 C14 C13 H13 120.3 . . ?
 O1 C19 H19A 110.0 . . ?
 O1 C19 H19B 110.0 . . ?
 O1 C19 C20 108.4(4) . . ?
 H19A C19 H19B 108.4 . . ?
 C20 C19 H19A 110.0 . . ?
 C20 C19 H19B 110.0 . . ?
 C15 C14 C13 119.0(4) . . ?
 C15 C14 H14 120.5 . . ?
 C13 C14 H14 120.5 . . ?
 C1 C2 C3 119.2(4) . . ?
 C1 C2 H2 120.4 . . ?
 C3 C2 H2 120.4 . . ?
 C19 C20 H20A 107.8 . . ?
 C19 C20 H20B 107.8 . . ?
 H20A C20 H20B 107.1 . . ?
 C21 C20 C19 118.2(5) . . ?
 C21 C20 H20A 107.8 . . ?
 C21 C20 H20B 107.8 . . ?
 C20 C21 H21A 109.7 . . ?
 C20 C21 H21B 109.7 . . ?
 C20 C21 H21C 107.4 . . ?
 C20 C21 H21D 107.4 . . ?
 C20 C21 C22 110.0(13) . . ?
 H21A C21 H21B 108.2 . . ?
 H21C C21 H21D 107.0 . . ?
 C22 C21 H21A 109.7 . . ?
 C22 C21 H21B 109.7 . . ?
 C26 C21 C20 119.6(11) . . ?
 C26 C21 H21C 107.4 . . ?
 C26 C21 H21D 107.4 . . ?
 H25A C25 H25B 109.5 . . ?
 H25A C25 H25C 109.5 . . ?
 H25B C25 H25C 109.5 . . ?
 C24 C25 H25A 109.3 . . ?
 C24 C25 H25B 110.0 . . ?
 C24 C25 H25C 109.1 . . ?
 H23A C23 H23B 106.6 . . ?
 C22 C23 H23A 106.7 . . ?
 C22 C23 H23B 106.7 . . ?
 C22 C23 C24 122.3(15) . . ?
 C24 C23 H23A 106.7 . . ?
 C24 C23 H23B 106.7 . . ?
 C21 C22 C23 120.1(14) . . ?
 C21 C22 H22A 107.3 . . ?
 C21 C22 H22B 107.3 . . ?
 C23 C22 H22A 107.3 . . ?
 C23 C22 H22B 107.3 . . ?
 H22A C22 H22B 106.9 . . ?
 C25 C24 C23 116.2(12) . . ?
 C25 C24 H24A 108.2 . . ?
 C25 C24 H24B 108.2 . . ?
 C23 C24 H24A 108.2 . . ?
 C23 C24 H24B 108.2 . . ?
 H24A C24 H24B 107.4 . . ?
 C37 C38 Cl4 122.4(8) . . ?
 C37 C38 C39 120.0 . . ?
 C39 C38 Cl4 117.3(8) . . ?
 C38 C37 Cl1 116.0(8) . . ?
 C42 C37 Cl1 123.0(8) . . ?
 C42 C37 C38 120.0 . . ?
 C37 C42 H42 120.0 . . ?
 C37 C42 C41 120.0 . . ?
 C41 C42 H42 120.0 . . ?
 C42 C41 H41 120.0 . . ?
 C40 C41 C42 120.0 . . ?
 C40 C41 H41 120.0 . . ?
 C41 C40 H40 120.0 . . ?
 C41 C40 C39 120.0 . . ?
 C39 C40 H40 120.0 . . ?
 C38 C39 H39 120.0 . . ?
 C40 C39 C38 120.0 . . ?
 C40 C39 H39 120.0 . . ?
 N4 C30 S2 172.9(5) . . ?
 N4 C30 S1 154.1(7) . . ?
 H28A C28 H28B 107.8 . . ?
 C27 C28 H28A 109.0 . . ?
 C27 C28 H28B 109.0 . . ?
 C27 C28 C29 112.7(16) . . ?
 C29 C28 H28A 109.0 . . ?
 C29 C28 H28B 109.0 . . ?
 C28 C27 H27A 108.2 . . ?
 C28 C27 H27B 108.2 . . ?
 H27A C27 H27B 107.3 . . ?
 C26 C27 C28 116.6(16) . . ?
 C26 C27 H27A 108.2 . . ?
 C26 C27 H27B 108.2 . . ?
 C28 C29 H29A 109.5 . . ?
 C28 C29 H29B 109.5 . . ?
 C28 C29 H29C 109.5 . . ?
 H29A C29 H29B 109.5 . . ?
 H29A C29 H29C 109.5 . . ?
 H29B C29 H29C 109.5 . . ?
 C21 C26 C27 115.0(14) . . ?
 C21 C26 H26A 108.5 . . ?
 C21 C26 H26B 108.5 . . ?
 C27 C26 H26A 108.5 . . ?
 C27 C26 H26B 108.5 . . ?
 H26A C26 H26B 107.5 . . ?
 C32 C31 Cl3 105.2(12) . . ?
 C32 C31 C36 120.0 . . ?
 C36 C31 Cl3 134.6(12) . . ?
 C31 C32 Cl2 131.7(11) . . ?
 C33 C32 Cl2 108.3(11) . . ?
 C33 C32 C31 120.0 . . ?
 C32 C33 H33 120.0 . . ?
 C32 C33 C34 120.0 . . ?
 C34 C33 H33 120.0 . . ?
 C33 C34 H34 120.0 . . ?
 C33 C34 C35 120.0 . . ?
 C35 C34 H34 120.0 . . ?
 C34 C35 H35 120.0 . . ?
 C36 C35 C34 120.0 . . ?
 C36 C35 H35 120.0 . . ?
 C31 C36 H36 120.0 . . ?
 C35 C36 C31 120.0 . . ?
 C35 C36 H36 120.0 . . ?

loop_
  _geom_torsion_atom_site_label_1
  _geom_torsion_atom_site_label_2
  _geom_torsion_atom_site_label_3
  _geom_torsion_atom_site_label_4
  _geom_torsion
  _geom_torsion_site_symmetry_1
  _geom_torsion_site_symmetry_2
  _geom_torsion_site_symmetry_3
  _geom_torsion_site_symmetry_4
  _geom_torsion_publ_flag
 Co1 N1 C1 C2 -176.3(4) . . . . ?
 Co1 N1 C5 C4 176.9(3) . . . . ?
 Co1 N3 C12 C11 176.5(3) 2_556 . . . ?
 Co1 N3 C15 C14 -176.1(3) 2_556 . . . ?
 Co1 N4 C30 S1 141.3(11) . . . . ?
 N2 C10 C9 C8 1.2(7) . . . . ?
 N2 C10 C11 C12 -24.4(6) . . . . ?
 N2 C10 C11 C13 155.0(4) . . . . ?
 N1 C1 C2 C3 -0.9(8) . . . . ?
 N3 C12 C11 C10 178.6(4) . . . . ?
 N3 C12 C11 C13 -0.8(6) . . . . ?
 N3 C15 C14 C13 0.4(7) . . . . ?
 O1 C18 C16 C17 -177.7(4) . . . . ?
 O1 C18 C16 C8 3.1(7) . . . . ?
 O1 C19 C20 C21 -56.2(7) . . . . ?
 C1 N1 C5 C4 -0.5(6) . . . . ?
 C12 N3 C15 C14 0.3(6) . . . . ?
 C12 C11 C13 C14 1.5(7) . . . . ?
 C10 N2 C6 C4 176.7(4) . . . . ?
 C10 N2 C6 C7 -1.6(6) . . . . ?
 C10 C9 C8 C7 0.1(7) . . . . ?
 C10 C9 C8 C16 178.3(4) . . . . ?
 C10 C11 C13 C14 -177.8(4) . . . . ?
 C9 C10 C11 C12 156.3(4) . . . . ?
 C9 C10 C11 C13 -24.3(7) . . . . ?
 C4 C3 C2 C1 0.0(8) . . . . ?
 C17 C18 C16 C17 0.9(8) 3_666 . . . ?
 C17 C18 C16 C8 -178.3(4) 3_666 . . . ?
 C17 C16 C8 C9 -128.9(5) . . . . ?
 C17 C16 C8 C7 49.1(7) . . . . ?
 C5 N1 C1 C2 1.1(7) . . . . ?
 C5 C4 C6 N2 -168.3(4) . . . . ?
 C5 C4 C6 C7 9.9(7) . . . . ?
 C5 C4 C3 C2 0.6(7) . . . . ?
 C6 N2 C10 C9 -0.5(6) . . . . ?
 C6 N2 C10 C11 -179.7(4) . . . . ?
 C6 C4 C5 N1 177.6(4) . . . . ?
 C6 C4 C3 C2 -177.4(5) . . . . ?
 C6 C7 C8 C9 -2.1(7) . . . . ?
 C6 C7 C8 C16 179.8(4) . . . . ?
 C18 O1 C19 C20 -168.6(4) . . . . ?
 C18 C17 C16 C18 -0.9(8) 3_666 . . . ?
 C18 C17 C16 C8 178.3(4) 3_666 . . . ?
 C18 C16 C8 C9 50.3(7) . . . . ?
 C18 C16 C8 C7 -131.6(5) . . . . ?
 C11 C10 C9 C8 -179.6(4) . . . . ?
 C11 C13 C14 C15 -1.3(7) . . . . ?
 C3 C4 C5 N1 -0.4(6) . . . . ?
 C3 C4 C6 N2 9.5(6) . . . . ?
 C3 C4 C6 C7 -172.2(5) . . . . ?
 C8 C7 C6 N2 2.9(7) . . . . ?
 C8 C7 C6 C4 -175.2(4) . . . . ?
 C15 N3 C12 C11 -0.1(6) . . . . ?
 C19 O1 C18 C17 -9.5(7) . . . 3_666 ?
 C19 O1 C18 C16 169.1(4) . . . . ?
 C19 C20 C21 C22 -70.1(11) . . . . ?
 C19 C20 C21 C26 -49.6(11) . . . . ?
 Cl1 C37 C42 C41 -168.3(8) . . . . ?
 Cl4 C38 C37 Cl1 -4.9(9) . . . . ?
 Cl4 C38 C37 C42 -174.0(9) . . . . ?
 Cl4 C38 C39 C40 174.3(8) . . . . ?
 C20 C21 C22 C23 -77(3) . . . . ?
 C20 C21 C26 C27 -62(2) . . . . ?
 C22 C23 C24 C25 -172(2) . . . . ?
 C24 C23 C22 C21 173(2) . . . . ?
 C38 C37 C42 C41 0.0 . . . . ?
 C37 C38 C39 C40 0.0 . . . . ?
 C37 C42 C41 C40 0.0 . . . . ?
 C42 C41 C40 C39 0.0 . . . . ?
 C41 C40 C39 C38 0.0 . . . . ?
 C39 C38 C37 Cl1 169.1(7) . . . . ?
 C39 C38 C37 C42 0.0 . . . . ?
 C28 C27 C26 C21 -60(3) . . . . ?
 C29 C28 C27 C26 -178(2) . . . . ?
 Cl2 C32 C33 C34 -179.1(8) . . . . ?
 Cl3 C31 C32 Cl2 -5.7(11) . . . . ?
 Cl3 C31 C32 C33 175.4(8) . . . . ?
 Cl3 C31 C36 C35 -173.8(11) . . . . ?
 C31 C32 C33 C34 0.0 . . . . ?
 C32 C31 C36 C35 0.0 . . . . ?
 C32 C33 C34 C35 0.0 . . . . ?
 C33 C34 C35 C36 0.0 . . . . ?
 C34 C35 C36 C31 0.0 . . . . ?
 C36 C31 C32 Cl2 178.9(11) . . . . ?
 C36 C31 C32 C33 0.0 . . . . ?

_smtbx_masks_special_details       ?
loop_
  _smtbx_masks_void_nr
  _smtbx_masks_void_average_x
  _smtbx_masks_void_average_y
  _smtbx_masks_void_average_z
  _smtbx_masks_void_volume
  _smtbx_masks_void_count_electrons
  _smtbx_masks_void_content
 1 0.000 0.500 0.500 280.3 95.6 '1.3 C6H4Cl2'
 2 0.500 0.000 0.000 280.3 95.6 '1.3 C6H4Cl2'

_smtbx_masks_void_probe_radius     1.2
_smtbx_masks_void_truncation_radius  1.2
_shelx_res_file
;
TITL
    cas_116_2_150k.res
    created by SHELXL-2018/3 at 16:33:46 on 12-May-2022
CELL 1.54186 15.2267 14.6023 16.9263 90 114.392 90
ZERR 2 0.0004 0.0003 0.0005 0 0.002 0
LATT 1
SYMM 0.5-X,0.5+Y,0.5-Z
SFAC C Cl Co H N O S
UNIT 141.2 12.4 2 128.8 16 4 4
EADP C40 C39 C38 C37 C42 C41
SADI Cl4 C38 Cl1 C37
SADI C19 C20 C21 C20 C22 C21 C24 C23 C24 C25
SADI C24 C25 C24 C23 C22 C23 C22 C21 C21 C20 C19 C20
DANG 2.4 C26 C28
SADI C29 C28 C28 C27 C26 C27 C26 C21
EADP C31 C33 C34 C35 C36
RIGU C19 C20 C21 C25 C23 C22 C24 C28 C27 C29 C26
SIMU C19 C20 C21 C25 C23 C22 C24 C28 C27 C29 C26
EADP Cl1 Cl3 Cl4 Cl2
SIMU C38 C37 C42 C41 C40 C39 C33 C34 C35 C36 C31
RIGU C38 C37 C42 C41 C40 C39 C33 C34 C35 C36 C31
RIGU C32 C33 C34 C35 C36 C31
SIMU C32 C31 C35 C34 C33 C36
SADI C29 C28 C25 C24 C24 C23 C28 C27 C23 C22 C27 C26 C22 C21 C26 C21 C20 =
 C19 C21 C20

L.S. 25
PLAN  5
SIZE 0.15 0.183 0.25
CONF
MORE -1
ABIN
BOND $H
fmap 2
acta
REM <olex2.extras>
REM <HklSrc "%./CAS_116_2_150K.hkl">
REM </olex2.extras>

WGHT    0.100000   12.000000
EXTI    0.000950
FVAR       0.36428
CO1   3    0.500000    0.500000    1.000000    10.50000    0.03075    0.02456 =
         0.03252   -0.00190    0.01639   -0.00418
PART 1
S2    7    0.426259    0.351691    0.732113    10.80000    0.11256    0.09553 =
         0.05765   -0.03672    0.05267   -0.05149
PART 0
N2    5    0.302517    0.747759    0.628434    11.00000    0.03683    0.03309 =
         0.03977    0.00560    0.02229    0.00851
N1    5    0.411225    0.601357    0.906507    11.00000    0.03607    0.03116 =
         0.03862    0.00272    0.02042    0.00011
N3    5    0.126652    0.953160    0.473895    11.00000    0.03084    0.02818 =
         0.03759    0.00264    0.01919    0.00452
O1    6    0.536718    0.686277    0.505912    11.00000    0.06721    0.03170 =
         0.08221    0.00707    0.05657    0.01059
N4    5    0.465916    0.406401    0.900768    11.00000    0.03837    0.03277 =
         0.04073   -0.00316    0.02173   -0.00907
C1    1    0.355044    0.657786    0.926950    11.00000    0.05088    0.03926 =
         0.04794    0.00441    0.03331    0.01032
AFIX  43
H1    4    0.357531    0.655196    0.982734    11.00000   -1.20000
AFIX   0
C12   1    0.176038    0.879310    0.515134    11.00000    0.03431    0.02661 =
         0.04110    0.00329    0.02173    0.00873
AFIX  43
H12   4    0.158686    0.851362    0.555968    11.00000   -1.20000
AFIX   0
C10   1    0.304932    0.760602    0.550630    11.00000    0.03832    0.03025 =
         0.04102    0.00459    0.02390    0.00801
C9    1    0.354279    0.702858    0.518594    11.00000    0.04356    0.03784 =
         0.04086    0.00709    0.02630    0.01072
AFIX  43
H9    4    0.355330    0.714527    0.464977    11.00000   -1.20000
AFIX   0
C4    1    0.348531    0.668434    0.763238    11.00000    0.04010    0.03157 =
         0.04408    0.00433    0.02715    0.00722
C7    1    0.398250    0.612920    0.646543    11.00000    0.04697    0.03409 =
         0.04784    0.01198    0.03082    0.01579
AFIX  43
H7    4    0.427721    0.561993    0.679978    11.00000   -1.20000
AFIX   0
C17   1    0.435985    0.468856    0.532703    11.00000    0.05258    0.03636 =
         0.05300    0.01163    0.03675    0.01586
AFIX  43
H17   4    0.393276    0.447682    0.555057    11.00000   -1.20000
AFIX   0
C5    1    0.407494    0.607608    0.825859    11.00000    0.03481    0.03369 =
         0.03852    0.00199    0.02216    0.00440
AFIX  43
H5    4    0.446805    0.568824    0.811102    11.00000   -1.20000
AFIX   0
C6    1    0.349520    0.675531    0.676149    11.00000    0.03721    0.03234 =
         0.04170    0.00436    0.02336    0.00913
C18   1    0.519278    0.593619    0.500718    11.00000    0.05767    0.03131 =
         0.05329    0.01006    0.03705    0.01543
C16   1    0.453788    0.562311    0.533384    11.00000    0.04654    0.03614 =
         0.04595    0.01042    0.03086    0.01317
C11   1    0.252207    0.841660    0.500464    11.00000    0.03524    0.03194 =
         0.04099    0.00413    0.02190    0.00591
C3    1    0.290224    0.725083    0.786597    11.00000    0.06012    0.05140 =
         0.05434    0.01687    0.03861    0.02830
AFIX  43
H3    4    0.249010    0.766578    0.746849    11.00000   -1.20000
AFIX   0
C8    1    0.402741    0.626613    0.567299    11.00000    0.04775    0.03588 =
         0.04438    0.00756    0.03042    0.01301
C15   1    0.152462    0.993091    0.415122    11.00000    0.03692    0.03623 =
         0.04317    0.00628    0.02263    0.00668
AFIX  43
H15   4    0.118919    1.044800    0.386121    11.00000   -1.20000
AFIX   0
C13   1    0.276359    0.883499    0.438461    11.00000    0.04684    0.04365 =
         0.05134    0.01094    0.03294    0.01473
AFIX  43
H13   4    0.325635    0.859841    0.425584    11.00000   -1.20000
AFIX   0
C19   1    0.614725    0.719527    0.488018    11.00000    0.05200    0.04657 =
         0.06517    0.00092    0.03834    0.00458
AFIX  23
H19A  4    0.599041    0.714114    0.426539    11.00000   -1.20000
H19B  4    0.672373    0.683845    0.519719    11.00000   -1.20000
AFIX   0
C14   1    0.226365    0.960793    0.395986    11.00000    0.04840    0.04133 =
         0.05027    0.01462    0.03107    0.01340
AFIX  43
H14   4    0.242480    0.990419    0.355162    11.00000   -1.20000
AFIX   0

PART 1
CL1   2    0.566356    0.797256    0.791562    10.50000    0.11439    0.15002 =
         0.15967   -0.01187    0.04247   -0.02318

PART 0
C2    1    0.293686    0.719543    0.869446    11.00000    0.07235    0.05834 =
         0.05182    0.01163    0.04378    0.02745
AFIX  43
H2    4    0.254917    0.757201    0.885938    11.00000   -1.20000
AFIX   0

PART 1
CL4   2    0.729083    0.946847    0.822275    10.50000    0.11439    0.15002 =
         0.15967   -0.01187    0.04247   -0.02318

PART 0
C20   1    0.631823    0.817859    0.515202    11.00000    0.06697    0.04454 =
         0.08874   -0.00568    0.04663   -0.00203
AFIX  23
H20A  4    0.654454    0.820019    0.577802    11.00000   -1.20000
H20B  4    0.683838    0.840254    0.501438    11.00000   -1.20000
AFIX   0
C21   1    0.550812    0.882188    0.477898    11.00000    0.06334    0.05981 =
         0.11623    0.00536    0.03337   -0.00076
PART 1
AFIX  23
H21A  4    0.567737    0.940053    0.508676    10.50000   -1.20000
H21B  4    0.494885    0.857713    0.484302    10.50000   -1.20000
AFIX  23
PART 2
H21C  4    0.506666    0.869664    0.504617    10.50000   -1.20000
H21D  4    0.576132    0.943339    0.495713    10.50000   -1.20000
AFIX   0
PART 1
C25   1    0.652674    1.020445    0.249493    10.50000    0.12072    0.06524 =
         0.06714    0.00416    0.03901    0.00522
AFIX   3
H25A  4    0.654134    1.082085    0.269713    10.50000   -1.50000
H25B  4    0.714584    0.992445    0.280233    10.50000   -1.50000
H25C  4    0.637544    1.021145    0.188523    10.50000   -1.50000
AFIX   0
C23   1    0.589575    0.957856    0.358339    10.50000    0.09409    0.09346 =
         0.09874   -0.02958    0.03423   -0.04162
AFIX  23
H23A  4    0.655612    0.938282    0.391348    10.50000   -1.20000
H23B  4    0.584294    1.019028    0.378296    10.50000   -1.20000
AFIX   0
C22   1    0.527331    0.897213    0.384661    10.50000    0.07200    0.12489 =
         0.11550    0.00302    0.03319   -0.01255
AFIX  23
H22A  4    0.462307    0.921544    0.358176    10.50000   -1.20000
H22B  4    0.525815    0.837613    0.358821    10.50000   -1.20000
AFIX   0
C24   1    0.576102    0.966978    0.264579    10.50000    0.11472    0.05713 =
         0.08849   -0.01207    0.02310   -0.02771
AFIX  23
H24A  4    0.573145    0.905955    0.240968    10.50000   -1.20000
H24B  4    0.514312    0.996041    0.231996    10.50000   -1.20000
AFIX  66

C38   1    0.736620    0.841210    0.774308    10.50000    0.09242    0.14273 =
         0.08673    0.05315    0.04106    0.04246
C37   1    0.666387    0.773753    0.755006    10.50000    0.09242    0.14273 =
         0.08673    0.05315    0.04106    0.04246
C42   1    0.680259    0.688796    0.724906    10.50000    0.09242    0.14273 =
         0.08673    0.05315    0.04106    0.04246
AFIX  43
H42   4    0.633268    0.643663    0.711991    10.50000   -1.20000
AFIX  65
C41   1    0.764363    0.671295    0.714107    10.50000    0.09242    0.14273 =
         0.08673    0.05315    0.04106    0.04246
AFIX  43
H41   4    0.773644    0.614453    0.693968    10.50000   -1.20000
AFIX  65
C40   1    0.834597    0.738751    0.733409    10.50000    0.09242    0.14273 =
         0.08673    0.05315    0.04106    0.04246
AFIX  43
H40   4    0.890869    0.727041    0.726184    10.50000   -1.20000
AFIX  65
C39   1    0.820727    0.823708    0.763510    10.50000    0.09242    0.14273 =
         0.08673    0.05315    0.04106    0.04246
AFIX  43
H39   4    0.867718    0.868841    0.776424    10.50000   -1.20000
AFIX   0

PART 0
C30   1    0.450413    0.378359    0.832721    11.00000    0.04578    0.05157 =
         0.05481   -0.01736    0.03071   -0.02237
PART 2
S1    7    0.455800    0.299934    0.763434    10.20000    0.08774    0.10339 =
         0.08088   -0.05874    0.06285   -0.03813
C28   1    0.594910    1.001788    0.351020    10.50000    0.12160    0.09921 =
         0.09023   -0.02190    0.03767   -0.04714
AFIX  23
H28A  4    0.641014    1.004870    0.411163    10.50000   -1.20000
H28B  4    0.545931    1.047938    0.342246    10.50000   -1.20000
AFIX   0
C27   1    0.548612    0.909476    0.333699    10.50000    0.10910    0.10518 =
         0.11297   -0.02770    0.05976   -0.03545
AFIX  23
H27A  4    0.505168    0.906282    0.272730    10.50000   -1.20000
H27B  4    0.598563    0.863972    0.343993    10.50000   -1.20000
AFIX   0
C29   1    0.646636    1.023371    0.292557    10.50000    0.12384    0.09628 =
         0.12549   -0.01155    0.05798   -0.02571
AFIX 137
H29A  4    0.640813    0.972126    0.255186    10.50000   -1.50000
H29B  4    0.713577    1.035084    0.327761    10.50000   -1.50000
H29C  4    0.617963    1.076440    0.258054    10.50000   -1.50000
AFIX   0
C26   1    0.494530    0.884197    0.384559    10.50000    0.07689    0.08644 =
         0.10170   -0.01715    0.04132   -0.01487
AFIX  23
H26A  4    0.441956    0.927315    0.371748    10.50000   -1.20000
H26B  4    0.466376    0.824125    0.365952    10.50000   -1.20000
AFIX   0

CL2   2    0.722556    0.662615    0.714986    10.40000    0.11439    0.15002 =
         0.15967   -0.01187    0.04247   -0.02318
CL3   2    0.578350    0.749376    0.761324    10.40000    0.11439    0.15002 =
         0.15967   -0.01187    0.04247   -0.02318
AFIX  66
C31   1    0.672036    0.812299    0.785604    10.40000    0.11250    0.10886 =
         0.06179    0.03729    0.01228    0.00657
C32   1    0.731670    0.764124    0.756480    10.40000    0.13156    0.05490 =
         0.04944    0.01777   -0.00236   -0.00067
C33   1    0.817310    0.803162    0.762095    10.40000    0.11250    0.10886 =
         0.06179    0.03729    0.01228    0.00657
AFIX  43
H33   4    0.857208    0.770930    0.742609    10.40000   -1.20000
AFIX  65
C34   1    0.843316    0.890376    0.796833    10.40000    0.11250    0.10886 =
         0.06179    0.03729    0.01228    0.00657
AFIX  43
H34   4    0.900615    0.916495    0.800589    10.40000   -1.20000
AFIX  65
C35   1    0.783684    0.938552    0.825956    10.40000    0.11250    0.10886 =
         0.06179    0.03729    0.01228    0.00657
AFIX  43
H35   4    0.801084    0.996904    0.849198    10.40000   -1.20000
AFIX  65
C36   1    0.698044    0.899515    0.820342    10.40000    0.11250    0.10886 =
         0.06179    0.03729    0.01228    0.00657
AFIX  43
H36   4    0.658145    0.931748    0.839828    10.40000   -1.20000
AFIX   0
HKLF 4


REM
REM wR2 = 0.2452, GooF = S = 1.024, Restrained GooF = 1.012 for all data
REM R1 = 0.0985 for 6173 Fo > 4sig(Fo) and 0.1033 for all 6654 data
REM 390 parameters refined using 422 restraints

END

WGHT      0.1752      5.5274

REM Highest difference peak  1.826,  deepest hole -0.991,  1-sigma level  0.100
Q1    1   0.6993  1.0389  0.1825  11.00000  0.05    0.76
Q2    1   0.5458  0.8223  0.7482  11.00000  0.05    0.67
Q3    1   0.5731  0.7630  0.8113  11.00000  0.05    0.60
Q4    1   0.5397  0.9760  0.4046  11.00000  0.05    0.48
Q5    1   0.6029  0.8967  0.3974  11.00000  0.05    0.45
;
_shelx_res_checksum                66522
_shelx_hkl_file
;
 -11   3  12   62.36    1.14   1
 -11   5  11    6.42    0.74   1
 -10   2   9    1.05    0.59   1
  -9   2   7   72.23    0.87   1
  -8  -2   9    0.89    0.43   1
  -8   3   5    6.98    0.41   1
  -8   4   5   24.26    0.56   1
 -11   4  16    0.04    0.49   1
 -10   0  12  375.78    1.82   1
 -10   1  10   76.31    0.96   1
 -10   3   9    6.26    0.77   1
  -7  -1   6  376.20    1.26   1
  -7   3   4    8.27    0.35   1
 -11   4  14   -0.30    0.65   1
 -10   1  16   -0.34    0.60   1
 -10   4   9    1.21    0.63   1
 -10   5   9   99.38    1.12   1
 -10   8  15    0.46    0.47   1
  -9  -1  11    1.98    0.60   1
  -9   1   8   19.50    0.58   1
  -9   3   7   20.87    0.60   1
  -9   4   7  109.27    1.03   1
  -9   5   7    5.42    0.54   1
  -8  -2  10    5.23    0.48   1
  -8  -1   8  214.39    1.10   1
  -8   7   6    0.49    0.55   1
  -8  11  13    6.34    0.41   1
  -7   5   4    5.31    0.35   1
  -6   5   3    4.76    0.31   1
 -10   1  15    2.94    0.71   1
 -10   6  17    0.46    0.38   1
 -10   7  16   24.37    0.62   1
 -10   8  13    0.95    0.62   1
 -10   8  14   12.49    0.62   1
  -9  -1  12    6.75    0.69   1
  -9   9  10   24.63    0.80   1
  -8   2   6   73.26    0.71   1
  -8  10   9   54.38    0.87   1
  -7   1   5   62.19    0.58   1
  -7   9   6  105.93    0.96   1
  -6   4   3   57.85    0.52   1
 -10   1  12  321.90    1.71   1
 -10   1  14   17.24    0.67   1
 -10   2  11   96.03    1.14   1
 -10   2  16   62.88    0.86   1
 -10   4  17    8.25    0.48   1
 -10   5  10   19.48    0.76   1
 -10   7  11   23.38    0.80   1
  -9  -1  13    4.53    0.55   1
  -9   2  18    0.38    0.33   1
  -8  -2  11    0.95    0.42   1
  -8   6   6  350.61    1.54   1
  -8   8   7   28.03    0.75   1
 -10   2  12  274.95    1.66   1
 -10   2  15  198.59    1.43   1
 -10   3  11    9.78    0.80   1
 -10   3  16  118.01    1.12   1
 -10   6  11    1.73    0.66   1
 -10   6  16    1.95    0.48   1
 -10   7  12    0.32    0.61   1
 -10   7  13    3.27    0.73   1
 -10   7  14   11.64    0.71   1
 -10   7  15    2.06    0.50   1
  -9   3   8  619.78    2.06   1
  -9   6   8   10.70    0.62   1
  -9   9  11   27.17    0.74   1
  -9   9  15    2.93    0.37   1
  -8  -2  12   23.54    0.57   1
  -8  -1   9  504.33    1.66   1
  -8   4   6  156.06    1.03   1
  -8  10  10   13.63    0.68   1
  -7   7   5   65.37    0.68   1
 -10   2  14   26.80    0.76   1
 -10   5  16   11.75    0.58   1
 -10   6  15    2.22    0.63   1
  -9   0  15   71.85    0.88   1
  -9   4   8   50.76    0.78   1
  -9   4  18    5.61    0.40   1
  -9   5  18   26.40    0.50   1
  -9   7   9    5.13    0.60   1
  -9   8  10   45.11    0.90   1
  -9   8  16    1.26    0.42   1
  -9   9  13   45.03    0.80   1
  -8   0   8   22.08    0.49   1
  -8  10  15    3.13    0.33   1
  -6   7   4   88.27    0.70   1
 -10   3  13  157.44    1.29   1
 -10   3  14   51.00    0.88   1
 -10   3  15   50.37    0.87   1
 -10   4  15    0.97    0.59   1
 -10   5  12   10.18    0.71   1
  -9   0  13    4.92    0.72   1
  -9   1  16    8.04    0.63   1
  -9   2  17    5.89    0.50   1
  -8  -1  10    4.26    0.52   1
  -8   7   7  138.30    1.08   1
  -7   3   5    5.06    0.39   1
  -7   6   5   74.45    0.70   1
  -7   8   6    4.90    0.53   1
 -10   4  13    0.98    0.65   1
 -10   4  14   21.50    0.74   1
 -10   5  13   72.24    1.00   1
 -10   5  14    3.63    0.62   1
  -9   3  17   -0.27    0.53   1
  -9   6  17   78.52    0.80   1
  -9   7  16   13.56    0.57   1
  -9   8  11   43.08    0.82   1
  -9   8  15   18.13    0.57   1
  -8   2   7  113.02    0.85   1
  -8   6   7    8.08    0.58   1
  -8   9  16   15.25    0.42   1
  -8  10  12    8.11    0.52   1
  -8  10  13   25.02    0.59   1
  -7   4   5   18.64    0.42   1
  -7   5   5  187.61    0.99   1
  -7   9   7   50.04    0.78   1
  -7  11  11   95.21    0.88   1
  -7  11  12   32.18    0.63   1
  -7  11  13    5.87    0.41   1
  -9   1  11    1.60    0.54   1
  -9   1  15  102.29    1.02   1
  -9   2  10  165.09    1.18   1
  -9   2  16   10.43    0.66   1
  -9   4   9   16.32    0.64   1
  -9   4  17   11.02    0.51   1
  -9   5  17   53.88    0.72   1
  -9   8  12    4.72    0.62   1
  -9   8  14   13.58    0.60   1
  -8  -1  11   83.41    0.82   1
  -8  -1  12    2.71    0.56   1
  -8  -1  13   61.89    0.85   1
  -8   0  16   28.66    0.70   1
  -8   1   8  224.38    1.14   1
  -8   1  17    5.52    0.53   1
  -8   3   7  210.21    1.13   1
  -8   5   7  188.77    1.18   1
  -8   6  18   34.39    0.51   1
  -7  -2  10    1.00    0.33   1
  -7  -1   8   68.94    0.62   1
  -7   1   6  396.98    1.30   1
  -6   6   4   17.85    0.38   1
  -9   1  13    4.73    0.57   1
  -9   3  16   69.23    0.92   1
  -9   6  10   45.04    0.85   1
  -9   6  16    0.86    0.47   1
  -9   7  11   22.11    0.74   1
  -9   7  15    1.54    0.50   1
  -8   4   7    2.35    0.43   1
  -8   4  18    2.74    0.42   1
  -8   5  18    8.83    0.38   1
  -8   7   8    7.22    0.62   1
  -8   8   9    2.27    0.65   1
  -8   9  15   22.08    0.52   1
  -7  -2  11  246.57    1.20   1
  -7   0   7   25.68    0.44   1
  -7   7   6   17.57    0.50   1
  -6   4   4    8.70    0.33   1
  -6   5   4  244.48    1.00   1
  -6   8   5    0.73    0.32   1
  -9   5  10   83.41    0.99   1
  -9   5  16    5.64    0.55   1
  -9   6  15    3.25    0.64   1
  -9   7  12    3.86    0.62   1
  -9   7  13   17.01    0.71   1
  -9   7  14   13.47    0.62   1
  -8   0  10  869.56    2.23   1
  -8   2   8  211.77    1.13   1
  -8   2  17   -0.47    0.50   1
  -8   7  17   72.27    0.73   1
  -8   8  16   21.97    0.51   1
  -8   9  11   89.07    0.99   1
  -8   9  12    2.69    0.62   1
  -8   9  14    1.94    0.45   1
  -7  -2  12   47.40    0.63   1
  -7   2   6  237.97    1.04   1
  -6   9   6   16.85    0.53   1
  -9   2  14  109.09    1.07   1
  -9   3  11   14.79    0.66   1
  -9   3  15   20.25    0.71   1
  -9   4  11    3.93    0.75   1
  -9   4  15   93.39    1.09   1
  -9   5  15    2.80    0.68   1
  -9   6  12   70.84    1.04   1
  -8   1   9  497.56    1.69   1
  -8   1  16    7.57    0.60   1
  -8   3   8    1.28    0.53   1
  -8   6   8   32.30    0.67   1
  -8   9  13    5.16    0.52   1
  -7  -1   9    6.18    0.36   1
  -7   2  18    0.65    0.39   1
  -7   3   6    8.76    0.42   1
  -7   6   6    1.40    0.36   1
  -7  10  10  144.53    1.14   1
  -7  10  14    4.74    0.46   1
  -9   4  14    0.68    0.69   1
  -9   5  13    2.06    0.77   1
  -9   6  13   14.92    0.70   1
  -8   3  17   27.93    0.62   1
  -8   4  17    1.56    0.49   1
  -8   5  17   13.84    0.56   1
  -8   7   9  145.16    1.14   1
  -8   8  15   12.11    0.53   1
  -7   1   7    5.39    0.33   1
  -7   3  18    2.25    0.40   1
  -7   4   6   22.09    0.45   1
  -7   6  18    5.72    0.33   1
  -7  10  11   38.88    0.72   1
  -7  10  12    0.22    0.57   1
  -7  10  13    2.18    0.52   1
  -6  -1   7   47.51    0.50   1
  -6   0   6   88.72    0.60   1
  -6   7   5   37.26    0.51   1
  -6  11  11    4.36    0.51   1
  -6  11  13    6.89    0.44   1
  -8   1  10    5.30    0.47   1
  -8   1  15    6.20    0.67   1
  -8   2   9    0.77    0.43   1
  -8   2  16   57.68    0.87   1
  -8   6   9   26.47    0.75   1
  -8   8  11    0.31    0.56   1
  -8   8  12   20.21    0.76   1
  -8   8  13   10.72    0.71   1
  -8   8  14   16.63    0.62   1
  -7  -1  10  295.30    1.26   1
  -7   1  17   -0.02    0.41   1
  -7   4  18   16.20    0.49   1
  -7   5  18   18.01    0.43   1
  -7   7   7   17.10    0.60   1
  -7   9  15   34.87    0.63   1
  -6   2   5  116.02    0.68   1
  -8   1  11   79.21    0.88   1
  -8   3   9   24.58    0.61   1
  -8   6  16   23.62    0.62   1
  -8   7  15   28.03    0.67   1
  -7  -1  11  145.67    0.98   1
  -7   2   7  290.71    1.19   1
  -7   8   8   15.67    0.60   1
  -7   8  16   38.56    0.64   1
  -6   6   5  155.15    0.87   1
  -6   8   6  119.09    0.88   1
  -6   9   7   25.25    0.64   1
  -8   1  12    3.71    0.51   1
  -8   1  13   62.68    0.83   1
  -8   2  15  104.27    1.00   1
  -8   4   9    1.04    0.49   1
  -8   4  16   23.17    0.63   1
  -8   5  16    7.62    0.57   1
  -8   6  10  167.85    1.29   1
  -8   6  15    7.89    0.67   1
  -8   7  14   16.36    0.64   1
  -7   0  15    8.86    0.62   1
  -7   2  17   13.04    0.52   1
  -7   6  17   30.64    0.62   1
  -7   9  10  100.05    1.00   1
  -7   9  14   22.07    0.57   1
  -6  -2  10  152.41    0.86   1
  -6   2  18   19.69    0.47   1
  -6   3   5  999.84    1.89   1
  -6   5   5   21.87    0.43   1
  -6   6  18    1.31    0.32   1
  -6   8  17   -0.04    0.33   1
  -6   9  16    0.24    0.34   1
  -6  10   9   15.79    0.66   1
  -8   2  11   -0.24    0.49   1
  -8   5  10   62.30    0.89   1
  -8   5  15    8.45    0.74   1
  -8   7  12   24.04    0.73   1
  -8   7  13   90.46    1.04   1
  -7   1   8   66.29    0.63   1
  -7   1  16  135.46    1.05   1
  -7   3  17    3.38    0.53   1
  -7   4   7  421.73    1.49   1
  -7   5   7  132.15    0.91   1
  -7   7   8   45.03    0.76   1
  -7   8   9   90.75    0.99   1
  -7   8  15   44.16    0.75   1
  -7   9  11   17.27    0.67   1
  -7   9  12   20.85    0.72   1
  -7   9  13    4.58    0.49   1
  -6  -2  11   21.11    0.50   1
  -6  -1   8    3.84    0.28   1
  -6   1   6  170.73    0.80   1
  -6   3  18    6.58    0.42   1
  -6   4   5   17.52    0.36   1
  -6   5  18    5.18    0.37   1
  -6  10  14   32.36    0.58   1
  -5  11  13    0.63    0.40   1
  -8   2  13    5.23    0.58   1
  -8   3  11  200.14    1.31   1
  -8   4  10   44.48    0.74   1
  -8   4  15    5.73    0.62   1
  -8   5  14   15.84    0.76   1
  -8   6  11    4.49    0.60   1
  -8   6  13    3.26    0.71   1
  -8   6  14  108.04    1.07   1
  -7   4  17    2.28    0.43   1
  -7   7  16   20.66    0.56   1
  -6   0  16  254.61    1.33   1
  -6   1  17    4.39    0.50   1
  -6   4  18   48.73    0.62   1
  -6   7   6   29.23    0.51   1
  -6   9   8   10.53    0.63   1
  -6  10  10  130.70    1.06   1
  -6  10  11  176.53    1.24   1
  -6  10  13    1.85    0.45   1
  -5   6   4   10.88    0.29   1
  -5   8   5   61.09    0.62   1
  -5  11  10   18.12    0.61   1
  -5  11  12  104.51    0.92   1
  -8   3  13   97.24    1.01   1
  -8   4  14   29.59    0.74   1
  -8   5  12   14.07    0.72   1
  -7   0  11    6.85    0.51   1
  -7   0  13  442.52    1.74   1
  -7   1   9    6.64    0.39   1
  -7   2  16   41.18    0.74   1
  -7   6  16    0.35    0.54   1
  -7   8  14   -0.04    0.52   1
  -6   7  17   26.13    0.52   1
  -6   8   7   16.64    0.51   1
  -6   8  16   24.98    0.58   1
  -6   9  15   56.29    0.69   1
  -5  -2   8  501.48    1.26   1
  -5   2  18    2.61    0.36   1
  -5   5   4    5.60    0.30   1
  -5   9   6   89.31    0.76   1
  -5  11  11    0.52    0.44   1
  -4  11  14    2.14    0.33   1
  -7   3   8  227.56    1.12   1
  -7   3  16    4.14    0.53   1
  -7   4   8   77.22    0.78   1
  -7   4  16    1.31    0.60   1
  -7   5  16    3.92    0.61   1
  -7   7   9    0.58    0.49   1
  -7   7  15   17.94    0.60   1
  -7   8  12    8.86    0.69   1
  -7   8  13   12.60    0.62   1
  -6  -1   9  221.64    0.97   1
  -6  -1  14   81.99    0.84   1
  -6   2  17    2.31    0.49   1
  -6   6   6    9.72    0.37   1
  -6   6  17   55.29    0.73   1
  -5   9  16    5.22    0.34   1
  -7   1  10  306.33    1.31   1
  -7   2   9  139.08    0.95   1
  -7   2  15   41.37    0.82   1
  -7   6   9  261.73    1.40   1
  -7   7  10   31.31    0.77   1
  -6  -1  10   15.56    0.45   1
  -6  -1  13  170.13    1.09   1
  -6   0   8  276.24    1.06   1
  -6   1   7   49.65    0.52   1
  -6   1  16    2.02    0.54   1
  -6   3  17   31.47    0.69   1
  -6   5   6   71.90    0.65   1
  -6   5  17   25.79    0.62   1
  -6   9  14    1.95    0.45   1
  -5   4  18    9.29    0.38   1
  -5   7   5   26.52    0.45   1
  -7   1  11  149.08    1.00   1
  -7   1  12   87.17    0.90   1
  -7   1  13   20.09    0.59   1
  -7   3   9  212.62    1.16   1
  -7   3  15   44.84    0.84   1
  -6  -1  11    7.64    0.45   1
  -6  -1  12  132.14    0.96   1
  -6   4   6   46.30    0.51   1
  -6   4  17   -0.07    0.40   1
  -6   7   7   10.52    0.45   1
  -6   7  16   23.27    0.57   1
  -6   8   8   38.67    0.67   1
  -6   8  15   49.63    0.71   1
  -6   9  12    9.60    0.63   1
  -5  -2   9   73.67    0.57   1
  -5   1  17    0.27    0.39   1
  -5   7  17    0.39    0.33   1
  -5   9   7    5.34    0.49   1
  -5  10  13    6.36    0.54   1
  -4  11  13    2.15    0.37   1
  -7   2  10    0.22    0.42   1
  -7   4   9    5.54    0.46   1
  -7   4  15    3.82    0.56   1
  -7   6  10    7.04    0.55   1
  -6   2  16   39.03    0.77   1
  -6   6  16    3.55    0.56   1
  -5  -2  10    0.56    0.29   1
  -5   8   6   59.96    0.64   1
  -5   8  16    0.41    0.37   1
  -5   9  15    6.15    0.42   1
  -5  10  10   39.21    0.76   1
  -5  10  12  114.46    1.04   1
  -4   4  18   53.41    0.62   1
  -4   5  18    0.06    0.31   1
  -4   9  16   10.39    0.37   1
  -4  11  12   45.50    0.69   1
  -7   2  11  250.36    1.28   1
  -7   2  12   45.56    0.72   1
  -7   2  13  235.70    1.34   1
  -7   3  10   10.30    0.50   1
  -7   4  10   54.03    0.80   1
  -7   4  14    1.04    0.56   1
  -7   5  14   10.46    0.63   1
  -7   6  11   12.01    0.61   1
  -6   0  14  144.24    1.03   1
  -6   1  15   12.59    0.65   1
  -6   2   7   33.08    0.45   1
  -6   3  16   19.40    0.68   1
  -6   5  16   14.43    0.66   1
  -6   6   7   37.46    0.55   1
  -6   7   8   30.13    0.62   1
  -6   7  15    2.54    0.60   1
  -6   8   9    1.97    0.47   1
  -6   8  14   20.96    0.66   1
  -5  -2  11  136.91    0.85   1
  -5   2  17   47.18    0.66   1
  -5   6   5   86.36    0.63   1
  -5   6  17   58.98    0.68   1
  -5  10  11   37.81    0.71   1
  -4  11  10   30.97    0.61   1
  -4  11  11   10.11    0.51   1
  -7   3  11   40.85    0.69   1
  -7   3  12  153.68    1.12   1
  -7   4  11  231.56    1.34   1
  -7   4  12    8.84    0.67   1
  -7   5  11    1.65    0.53   1
  -6   0  10  250.13    1.12   1
  -6   1   8    3.82    0.31   1
  -6   3   7 1693.85    2.63   1
  -6   4   7  118.53    0.80   1
  -6   8  10   30.97    0.68   1
  -6   8  13   20.88    0.69   1
  -5   3  17    4.51    0.45   1
  -5   5   5   28.55    0.42   1
  -5   5  17   15.24    0.49   1
  -5   7  16   11.51    0.55   1
  -5   9   8   37.50    0.70   1
  -5   9  14   91.50    0.88   1
  -4   7   4   14.09    0.33   1
  -4   7  17   22.09    0.46   1
  -4  10  14  112.52    0.91   1
  -6   0  12   91.06    0.81   1
  -6   1  14   79.30    0.93   1
  -6   2  15   85.90    0.90   1
  -6   6   8   70.30    0.76   1
  -6   7   9  171.91    1.16   1
  -6   7  14    7.28    0.60   1
  -6   8  12    4.41    0.57   1
  -5  -1   8  551.47    1.35   1
  -5   0  15   33.34    0.71   1
  -5   1  16   57.00    0.74   1
  -5   4   5  275.21    0.97   1
  -5   7   6   61.66    0.64   1
  -5   8   7   70.19    0.76   1
  -5   8  15   24.39    0.58   1
  -5   9  13    2.12    0.57   1
  -4   8  16    2.19    0.42   1
  -4   9   6   71.06    0.70   1
  -3   4  18    2.95    0.29   1
  -6   2   8   67.02    0.61   1
  -6   3  15  165.78    1.19   1
  -6   4  15    7.84    0.69   1
  -6   5  15   12.85    0.63   1
  -6   7  13  255.50    1.53   1
  -5  -1  13   63.40    0.74   1
  -5   6  16   11.33    0.60   1
  -5   9   9    1.88    0.49   1
  -5   9  12    1.95    0.59   1
  -4   2  17   19.69    0.57   1
  -4   6  17    0.17    0.33   1
  -4   8   5    0.18    0.26   1
  -4  10   8    5.03    0.52   1
  -4  10  13    9.42    0.50   1
  -3   7  17    5.51    0.36   1
  -6   1  10   16.78    0.50   1
  -6   1  13  170.75    1.10   1
  -6   3   8   68.34    0.64   1
  -6   4   8   11.03    0.47   1
  -6   5   8   15.75    0.46   1
  -6   6   9    5.18    0.56   1
  -6   6  14    4.57    0.58   1
  -6   7  10    9.26    0.56   1
  -6   7  11    4.01    0.56   1
  -5  -1   9   19.47    0.39   1
  -5   5  16   72.66    0.93   1
  -5   6   6   18.90    0.45   1
  -5   7  15   11.24    0.62   1
  -5   8  14   19.07    0.64   1
  -5   9  11  107.96    1.00   1
  -4   6   4  126.26    0.66   1
  -4  10  12   30.30    0.71   1
  -6   1  11    8.00    0.42   1
  -6   1  12  128.09    0.94   1
  -6   2   9   60.24    0.62   1
  -6   2  13   10.03    0.62   1
  -6   5  14    7.45    0.60   1
  -6   6  10   41.56    0.75   1
  -6   6  13   38.06    0.78   1
  -5  -1  10   48.74    0.55   1
  -5  -1  11   46.26    0.59   1
  -5   1  15   -0.05    0.54   1
  -5   2   6  241.09    0.89   1
  -5   3  16   13.98    0.57   1
  -5   7   7    8.88    0.48   1
  -5   8   8    0.72    0.43   1
  -4   9  14    1.72    0.44   1
  -4  10  10   17.25    0.59   1
  -4  10  11    0.88    0.50   1
  -3   6  17   13.87    0.45   1
  -3   8  16   20.37    0.48   1
  -3   9  15   20.04    0.52   1
  -6   2  10  153.94    0.95   1
  -6   2  12   53.19    0.78   1
  -6   3   9   83.89    0.73   1
  -6   3  13   33.80    0.79   1
  -6   4   9   84.96    0.76   1
  -6   5   9   46.50    0.64   1
  -6   6  11    9.99    0.58   1
  -6   6  12  206.48    1.32   1
  -5   5   6  424.00    1.31   1
  -5   6  15    7.63    0.58   1
  -5   7  14    8.09    0.65   1
  -4   1  16   40.88    0.67   1
  -4   7   5  157.21    0.84   1
  -4   9   7   74.60    0.74   1
  -6   2  11   26.28    0.55   1
  -6   3  10   43.74    0.62   1
  -6   3  11  666.99    2.01   1
  -6   3  12    9.89    0.61   1
  -6   4  10   94.02    0.87   1
  -6   4  12  187.31    1.26   1
  -6   5  12   25.04    0.68   1
  -5   0  13  329.81    1.44   1
  -5   1  14  177.12    1.18   1
  -5   2  15  138.75    1.07   1
  -5   3  15    2.04    0.62   1
  -5   4   6  145.72    0.76   1
  -5   8  10   78.17    0.87   1
  -5   8  12   87.41    0.96   1
  -4  -2   9   67.61    0.53   1
  -4   6  16   58.49    0.76   1
  -4   8   6   13.93    0.39   1
  -4   9  13   48.83    0.75   1
  -3   3  17    0.48    0.38   1
  -3   5  17    2.57    0.36   1
  -2   6  17    0.17    0.32   1
  -2   8  16    0.94    0.35   1
  -5   0   9  881.00    1.86   1
  -5   4  15   66.38    0.86   1
  -5   6   7   15.92    0.41   1
  -5   6  14    0.44    0.64   1
  -5   7   8  115.80    0.87   1
  -5   7  13   49.34    0.81   1
  -4  -2  10   39.05    0.45   1
  -4   3  16    1.29    0.56   1
  -4   4  16   23.60    0.67   1
  -4   5  16   -0.71    0.44   1
  -4   7  15   50.90    0.75   1
  -4   8  14    2.20    0.53   1
  -4   9   8   35.71    0.61   1
  -4   9  12   53.25    0.85   1
  -3   9  14   29.22    0.64   1
  -3  10  12   18.15    0.66   1
  -2   2  17   -0.07    0.39   1
  -5   0  11   12.30    0.49   1
  -5   1   8  568.20    1.46   1
  -5   2   7  713.56    1.59   1
  -5   5   7   10.07    0.41   1
  -5   5  14   78.80    0.99   1
  -5   7   9    2.58    0.44   1
  -4   1  15   47.03    0.79   1
  -4   6   5    0.62    0.29   1
  -4   9  11  109.42    1.00   1
  -3   1  16   32.29    0.68   1
  -3  10   8   19.92    0.61   1
  -3  10  11   25.21    0.70   1
  -2  11  10    2.69    0.52   1
  -1  10  14    6.91    0.39   1
  -5   3   7   55.62    0.53   1
  -5   4   7  158.31    0.84   1
  -5   7  10    4.48    0.51   1
  -5   7  11    5.86    0.57   1
  -4   6  15    4.69    0.55   1
  -4   7   6   33.99    0.51   1
  -4   7  14    3.83    0.64   1
  -4   8   7   29.32    0.52   1
  -4   8  13   16.27    0.65   1
  -3   6  16    0.33    0.42   1
  -3   9   6  120.77    0.85   1
  -3  10  10   21.05    0.67   1
  -2   7  16    0.74    0.36   1
  -1   2  17    4.49    0.36   1
  -1   9  15    0.38    0.29   1
  -5   1   9   20.45    0.40   1
  -5   1  12  307.86    1.34   1
  -5   2   8  471.92    1.39   1
  -5   2  13   86.36    0.86   1
  -5   5   8   96.92    0.78   1
  -5   6   9  102.90    0.90   1
  -5   6  12    1.41    0.55   1
  -4  -1  12    1.44    0.43   1
  -4   2  15   12.38    0.56   1
  -4   5   5 1784.45    2.43   1
  -4   5  15    4.73    0.57   1
  -4   8  12   12.09    0.69   1
  -3   0  15   33.04    0.67   1
  -3   2  16    0.39    0.45   1
  -3   3  16   16.68    0.61   1
  -3   5  16   45.96    0.71   1
  -3   7  15    5.97    0.57   1
  -3   8  14   56.71    0.84   1
  -3   9  13    9.38    0.53   1
  -2   8  15    2.63    0.47   1
  -2   9  14    5.83    0.50   1
  -1   4  17   19.06    0.43   1
  -5   1  10   48.27    0.55   1
  -5   1  11   43.34    0.58   1
  -5   3   8  112.77    0.77   1
  -5   4   8   79.96    0.70   1
  -5   4  13    4.04    0.55   1
  -5   5  12   49.27    0.83   1
  -5   6  11    9.22    0.56   1
  -4  -1  11   45.41    0.56   1
  -4   3  15   46.03    0.76   1
  -4   4  15   44.50    0.78   1
  -4   6  14   22.43    0.75   1
  -4   8   8   76.20    0.77   1
  -3   4  16    0.63    0.45   1
  -3   9  12  116.01    1.07   1
  -2   1  16    9.04    0.50   1
  -2  10  12   90.63    0.89   1
  -1  10  13   76.17    0.80   1
  -1  11  11    8.30    0.47   1
   0   3  17    5.42    0.30   1
   0   4  17   -0.32    0.25   1
   0  11  12    5.59    0.40   1
  -5   2   9   71.52    0.62   1
  -5   2  10    0.67    0.40   1
  -5   2  11  127.33    0.95   1
  -5   3  12    6.05    0.57   1
  -5   4  12  242.20    1.32   1
  -5   5   9   54.66    0.65   1
  -5   5  10   82.85    0.86   1
  -5   5  11    4.62    0.50   1
  -4  -1   9   26.56    0.37   1
  -4  -1  10  131.25    0.78   1
  -4   6   6  267.14    1.07   1
  -4   7   7  106.66    0.81   1
  -4   7  13    6.28    0.61   1
  -3   1  15    7.81    0.61   1
  -3   6  15    8.79    0.64   1
  -2   5  16    1.72    0.48   1
  -1   8  15   12.00    0.48   1
  -1  11  10  117.86    0.99   1
   0   7  16    0.80    0.29   1
  -5   3   9  176.25    0.94   1
  -5   3  10    6.23    0.41   1
  -5   3  11    2.95    0.44   1
  -5   4   9  142.83    0.89   1
  -5   4  10    8.01    0.45   1
  -5   4  11  348.34    1.48   1
  -4   4  14   53.23    0.90   1
  -3   7  14    1.71    0.62   1
  -3   9  11   53.13    0.80   1
  -2   2  16    2.48    0.43   1
  -2   3  16   -0.34    0.52   1
  -2   4  16    5.23    0.51   1
  -2   9  13   14.63    0.55   1
  -2  10   7   12.70    0.45   1
  -2  10  11    5.75    0.52   1
  -1   6  16    1.85    0.37   1
  -1  11   9    1.63    0.48   1
  -4   1  13  168.23    1.08   1
  -4   5   6    0.62    0.24   1
  -4   7   8    6.93    0.40   1
  -3  -1  13   53.03    0.64   1
  -3   2  15   24.71    0.63   1
  -3   3  15    3.39    0.60   1
  -3   4  15   38.52    0.83   1
  -3   5  15    0.49    0.53   1
  -3   8   6    3.22    0.31   1
  -2   8  14   21.73    0.61   1
  -2  10   8  145.81    1.02   1
  -2  10  10  282.06    1.43   1
  -1   5  16   21.12    0.56   1
  -1  10  12   38.66    0.71   1
   0   6  16    8.45    0.41   1
   0   8  15    0.20    0.33   1
   0   9  14   29.99    0.56   1
   0  10  13    0.35    0.35   1
  -4   0   8  519.57    1.30   1
  -4   2  13   92.32    0.94   1
  -4   4   6  109.38    0.67   1
  -4   6   7  101.42    0.73   1
  -4   6  12  111.10    1.08   1
  -4   7  10   65.32    0.80   1
  -3   6  14    3.40    0.63   1
  -3   7   5  220.47    0.93   1
  -3   8  12    2.13    0.54   1
  -2   6  15   60.81    0.81   1
  -2   9  12    1.31    0.58   1
  -1   2  16    5.52    0.42   1
  -1   3  16    2.03    0.47   1
  -1   4  16    2.95    0.46   1
  -1   7  15    1.30    0.47   1
   0   1  16    8.65    0.44   1
   1   6  16   12.94    0.37   1
   1   8  15    1.06    0.29   1
  -4   0  10   25.07    0.43   1
  -4   1  12    0.43    0.38   1
  -4   3   6   51.50    0.45   1
  -4   3  13   76.93    0.86   1
  -4   4  13    0.32    0.52   1
  -4   6   8  377.07    1.41   1
  -4   6  11   90.96    0.98   1
  -3   7  13   91.04    0.98   1
  -3   8   7  142.14    0.91   1
  -2   7  14   -0.56    0.59   1
  -2   8  13   28.78    0.75   1
  -1   0  15    4.00    0.49   1
  -1   8  14   20.60    0.63   1
  -1  10  11   57.61    0.84   1
   0   2  16    5.30    0.44   1
   0  11  10   -0.07    0.40   1
   1  11  11    3.33    0.42   1
  -4   1  11   40.86    0.60   1
  -4   5   7  479.12    1.41   1
  -3   0  13  176.15    1.07   1
  -3   4  14    0.59    0.62   1
  -3   5  14    9.37    0.59   1
  -3   8   8   34.27    0.64   1
  -3   8  10   33.74    0.73   1
  -2   4  15    0.69    0.59   1
  -2   5  15   24.95    0.66   1
  -2   9   6   27.33    0.48   1
  -2   9  11  242.00    1.39   1
  -1   6  15   25.61    0.66   1
   0   7  15   39.79    0.62   1
   0  11   9   26.13    0.61   1
   1   2  16    4.16    0.38   1
   1   5  16   28.71    0.48   1
   2   2  16   15.02    0.40   1
  -4   1   8  624.47    1.47   1
  -4   1   9   27.49    0.45   1
  -4   1  10  124.27    0.81   1
  -4   2   7   61.26    0.50   1
  -4   3  12    0.07    0.45   1
  -4   4   7    1.14    0.26   1
  -4   4  12   48.18    0.73   1
  -4   5   8  169.30    0.93   1
  -3  -1  11   63.68    0.64   1
  -3   6  13   19.24    0.66   1
  -3   7   6  297.30    1.14   1
  -2  -1  13   38.06    0.63   1
  -2   3  15   52.27    0.78   1
  -2   9   7  261.53    1.28   1
  -1  10  10    0.85    0.46   1
   0   8  14   74.89    0.84   1
   0   9  13    5.04    0.50   1
   1   4  16    6.47    0.35   1
   1  11  10   21.79    0.57   1
  -4   2   8  306.29    1.08   1
  -4   3  11  370.46    1.47   1
  -4   4   8    7.41    0.40   1
  -4   5   9  291.78    1.26   1
  -3   1  13   46.76    0.68   1
  -3   7  11    6.06    0.63   1
  -2   7  13    3.58    0.69   1
  -2   8   5   34.84    0.48   1
  -2   8  12  302.51    1.57   1
  -2   9   8    0.08    0.43   1
  -1   1  15    4.99    0.46   1
  -1   5  15   32.89    0.69   1
  -1   8  13    7.38    0.62   1
  -1   9  12  178.40    1.21   1
  -1  10   9   23.67    0.59   1
   0   6  15   22.67    0.61   1
   0  10  11    3.14    0.59   1
   1  10  12    0.45    0.40   1
  -4   2  10   40.39    0.54   1
  -4   3   8    1.17    0.29   1
  -4   3   9  234.90    1.07   1
  -4   3  10   26.88    0.51   1
  -4   4   9    5.54    0.37   1
  -4   4  10  101.54    0.82   1
  -3  -1  10   14.45    0.34   1
  -3   2  13   64.58    0.83   1
  -3   4  13  105.75    1.05   1
  -3   7  10   14.87    0.66   1
  -2   5  14   22.60    0.67   1
  -2   7   4   62.84    0.51   1
  -1   3  15    1.42    0.57   1
  -1   4  15   15.06    0.58   1
   1   8  14   11.51    0.45   1
   1   9  13    1.01    0.38   1
   1  11   9    3.72    0.50   1
   2   8  14    6.43    0.40   1
   2  11  10    0.91    0.42   1
  -3  -1   9  216.15    0.88   1
  -3   3  13   93.67    0.93   1
  -3   5   5  249.10    0.90   1
  -3   6   6    7.14    0.30   1
  -3   7   8  696.29    1.94   1
  -3   7   9   42.25    0.64   1
  -2   3  14    4.58    0.61   1
  -2   4  14   25.87    0.68   1
   0   1  15    4.99    0.45   1
   0   9  12    7.11    0.60   1
   0  10  10  115.43    1.05   1
  -3   0  11  109.33    0.77   1
  -3   1  12  130.11    0.92   1
  -3   5  12   12.81    0.59   1
  -3   6  11   28.16    0.65   1
  -2   6  13    2.01    0.56   1
  -2   8   6  183.95    0.96   1
  -1   8  12   10.31    0.66   1
   0   2  15    0.31    0.52   1
   0   3  15    1.49    0.51   1
   0   4  15   -0.05    0.44   1
   1   1  15    0.74    0.43   1
   1  10  11    2.16    0.47   1
   4  11  10    1.33    0.30   1
  -3   2  12    2.03    0.43   1
  -3   3  12   55.52    0.74   1
  -3   5   6  183.15    0.85   1
  -3   6   7   50.12    0.54   1
  -3   6   8   23.60    0.53   1
  -3   6   9  254.30    1.27   1
  -3   6  10   48.56    0.70   1
  -2   1  13   37.50    0.70   1
  -2   8   7   29.13    0.52   1
  -2   8   9    0.44    0.43   1
  -1  -1  13   36.66    0.62   1
  -1   1  14   10.73    0.63   1
  -1   5  14    3.11    0.53   1
   0  10   9    8.79    0.53   1
   1   2  15    9.60    0.52   1
   1   4  15   63.56    0.79   1
   1   9  12    1.88    0.52   1
   2   1  15    3.84    0.42   1
   2   5  15   31.78    0.55   1
   2  11   9   19.79    0.57   1
   3   5  15    0.51    0.27   1
  -3   0   9   53.05    0.55   1
  -3   1  11   58.88    0.63   1
  -2   2  13    4.06    0.56   1
  -2   7  11   12.53    0.60   1
  -1   2  14   46.07    0.82   1
  -1   4  14    2.62    0.53   1
  -1   9   6   72.02    0.68   1
   0   0  14   42.41    0.72   1
   0   6  14   74.54    0.89   1
   1   3  15    0.92    0.44   1
   1   8  13   13.88    0.55   1
   1  10  10    4.40    0.59   1
   2   3  15   82.85    0.82   1
   2   4  15    0.15    0.34   1
   2  10  11    1.77    0.44   1
   3   3  15    3.10    0.36   1
   3   7  14    9.02    0.39   1
  -3   1  10   16.03    0.44   1
  -3   4   6   41.96    0.43   1
  -3   5   7    7.62    0.31   1
  -3   5   9   63.28    0.71   1
  -3   5  10   81.76    0.80   1
  -2  -1  11   47.50    0.58   1
  -2   0  12  391.40    1.49   1
  -2   3  13   29.57    0.67   1
  -1   7  12  164.73    1.30   1
  -1   8   4   17.36    0.36   1
   0   5  14    0.55    0.63   1
   0   7  13   34.39    0.74   1
   0   8  12   14.59    0.70   1
   1   6  14    1.16    0.53   1
   2   8  13    1.28    0.42   1
   2   9  12    0.84    0.40   1
   2  11   8    8.01    0.46   1
   3   8  13    8.72    0.45   1
   3  11   9    0.18    0.42   1
   4  10  11    2.06    0.36   1
  -3   1   9  200.91    0.93   1
  -3   2  10   16.83    0.48   1
  -3   4  10   38.06    0.59   1
  -3   5   8  210.62    1.02   1
  -2   6  11   27.63    0.76   1
  -2   7   9   95.82    0.91   1
  -1   0  13    5.50    0.45   1
   0   1  14    9.84    0.59   1
   2   6  14   20.04    0.60   1
   3   9  12    1.69    0.37   1
  -3   2   9  180.36    0.92   1
  -3   3   7  465.84    1.29   1
  -3   3  10  255.24    1.17   1
  -3   4   7  617.13    1.52   1
  -3   4   8  243.17    1.05   1
  -3   4   9  237.67    1.11   1
  -2   4  12   18.15    0.61   1
  -2   7   7  120.66    0.82   1
  -1  -1  12  166.82    1.03   1
  -1   1  13   37.08    0.72   1
   0   2  14    4.66    0.54   1
   0   6  13   10.44    0.67   1
   1   5  14   46.97    0.81   1
   1   7  13   17.83    0.63   1
   1   9  11    8.21    0.54   1
   2  10  10   37.09    0.68   1
   3   6  14    1.21    0.36   1
   3  11   8   93.30    0.89   1
  -2   2  12    3.43    0.45   1
  -2   3  12   78.35    0.84   1
  -2   5  11   50.19    0.80   1
  -2   6  10   10.47    0.53   1
  -1   8   9   88.70    0.88   1
   0   7  12   22.03    0.77   1
   0   8  11    1.82    0.54   1
   1   1  14    4.92    0.57   1
   2   0  14    2.39    0.46   1
   2   5  14    3.76    0.53   1
   2   7  13    1.85    0.54   1
   3  10  10   -0.07    0.52   1
   4   5  14    2.55    0.38   1
   5   7  13    2.25    0.30   1
  -2  -1   9   12.25    0.33   1
  -2   6   9   10.40    0.55   1
  -1   8   6   66.34    0.64   1
  -1   8   7  358.06    1.46   1
   0   5  13   65.20    0.97   1
   0   9   5   87.77    0.74   1
   1   2  14    0.62    0.49   1
   1   6  13    2.95    0.63   1
   1   9  10   33.16    0.77   1
   1  10   6    0.50    0.45   1
   2   1  14    0.63    0.48   1
   2   8  12    6.79    0.54   1
   2   9  11    6.14    0.51   1
   2  10   9    0.92    0.55   1
   3   5  14   24.58    0.55   1
   4   7  13   28.34    0.55   1
   4  10  10    6.54    0.47   1
   4  11   8    7.16    0.42   1
   5   2  14   12.81    0.41   1
  -2   0  10   14.77    0.43   1
  -2   1  11   47.05    0.60   1
  -2   2  11   53.22    0.71   1
  -2   3  11  221.96    1.24   1
  -2   4  11   70.60    0.79   1
  -2   5  10   37.87    0.64   1
  -2   6   7    1.28    0.37   1
  -1   7   4   71.86    0.55   1
  -1   7  10   51.98    0.77   1
   0   9   6   67.33    0.73   1
   0   9   7    3.69    0.42   1
   2   2  14   56.98    0.84   1
   2   3  14   13.54    0.62   1
   3   1  14   15.85    0.58   1
   3   4  14    1.80    0.39   1
   3   8  12    1.09    0.45   1
   4   1  14    1.62    0.35   1
   4   2  14    2.13    0.40   1
   4   4  14    7.01    0.38   1
   4   9  11    4.35    0.46   1
   5   8  12    3.14    0.33   1
   5   9  11    2.84    0.39   1
  -1  -1  11   16.07    0.42   1
  -1   4  12   14.21    0.61   1
   0   4  13   19.20    0.66   1
   1   7  12    3.59    0.58   1
   1   8  11   71.06    0.90   1
   2   6  13    0.32    0.51   1
   2  10   8   90.52    0.96   1
   3   2  14    0.48    0.41   1
   3  10   9   26.01    0.69   1
   5   6  13   14.18    0.47   1
  -2   1  10  178.36    0.95   1
  -2   4  10  118.15    0.90   1
  -2   5   6   18.25    0.37   1
  -2   5   9  182.90    1.05   1
  -1   3  12   19.48    0.61   1
  -1   7   9    1.54    0.45   1
   0   8   9   63.14    0.87   1
   2   7  12    3.08    0.62   1
   4   6  13    1.45    0.43   1
   4  10   9    6.44    0.52   1
   6   5  13   21.48    0.44   1
   6   7  12    4.16    0.37   1
  -2   2  10    6.21    0.37   1
  -2   3  10   41.65    0.59   1
  -2   4   9  138.51    0.93   1
  -2   5   7  133.06    0.79   1
  -1   0  11  298.61    1.31   1
  -1   5  11    5.78    0.54   1
  -1   6  10    0.73    0.48   1
  -1   7   5   10.12    0.31   1
  -1   7   6    7.89    0.39   1
  -1   7   7   56.62    0.65   1
  -1   7   8   54.31    0.67   1
   2   8  11   13.72    0.64   1
   3   9  10   12.50    0.63   1
   5   5  13    1.91    0.41   1
  -2   1   9   12.85    0.34   1
  -1   4  11   53.75    0.76   1
   0   0  12  273.91    1.34   1
   0   4  12   14.54    0.70   1
   0   6  11  130.38    1.13   1
   0   7  10   22.70    0.65   1
   0   8   4   75.22    0.58   1
   0   8   8    5.01    0.45   1
   1   2  13   54.77    0.82   1
   1   3  13    0.34    0.51   1
   3   5  13    3.83    0.51   1
   3   8  11    4.73    0.55   1
   3  10   8    0.94    0.48   1
   4   5  13    6.77    0.48   1
   4   7  12    0.84    0.45   1
   4   9  10    3.95    0.54   1
   5   7  12   10.70    0.47   1
   6   1  13    4.85    0.38   1
   6   4  13    1.00    0.30   1
   6   8  11   -0.02    0.33   1
  -2   2   9   20.25    0.41   1
  -2   4   6   85.58    0.57   1
  -1   2  11  206.02    1.19   1
  -1   3  11    1.60    0.45   1
  -1   5  10  130.84    1.01   1
  -1   6   9   13.85    0.51   1
   0   1  12   32.96    0.70   1
   0   8   5   35.95    0.53   1
   0   8   7    0.08    0.40   1
   1   9   5    4.77    0.41   1
   1   9   6  148.18    1.01   1
   1   9   7   39.01    0.65   1
   2   1  13    1.56    0.57   1
   3   0  13   30.03    0.67   1
   3   4  13    4.57    0.60   1
   4   8  11   13.73    0.54   1
   4  10   8  114.61    1.02   1
   5   4  13   14.62    0.52   1
   5   8  11   23.30    0.57   1
   5   9  10   11.50    0.49   1
   6   2  13    0.11    0.31   1
   6   3  13    1.36    0.27   1
  -2   2   8  270.50    1.04   1
  -2   3   7  741.69    1.64   1
  -2   3   8    8.45    0.34   1
  -1   6   8  131.78    0.92   1
   0   2  12  103.84    0.96   1
   0   7   9    7.47    0.52   1
   2   2  13   30.81    0.67   1
   2   7  11   67.69    0.98   1
   2   8  10   74.43    0.93   1
   3   1  13   17.26    0.66   1
   3   3  13   12.59    0.63   1
   3   6  12    3.79    0.65   1
   4   4  13    0.59    0.44   1
   5   1  13   21.94    0.58   1
   5   2  13    2.26    0.46   1
   5   3  13    1.87    0.47   1
   5  10   8   20.06    0.60   1
   6   6  12   19.47    0.50   1
   7   5  12   15.69    0.45   1
   7   7  11   12.84    0.45   1
  -1  -1   9  339.76    1.16   1
  -1   5   9  106.53    0.87   1
  -1   6   5  155.85    0.79   1
   0   6  10   35.03    0.70   1
   2   5  12   60.94    0.96   1
   4   3  13    3.85    0.45   1
   4   6  12    1.64    0.51   1
   5   6  12    0.56    0.44   1
   6  10   8   63.63    0.73   1
  -1   1  10  105.06    0.78   1
  -1   2  10   51.17    0.66   1
  -1   3  10    3.64    0.42   1
   0   4  11    2.20    0.52   1
   0   7   8   16.04    0.51   1
   1   1  12   95.85    0.98   1
   1   2  12    0.84    0.58   1
   3   7  11    0.21    0.58   1
   3   8  10   20.63    0.70   1
   4   7  11   26.14    0.77   1
   4   9   9  123.97    1.08   1
   4  10   7    3.37    0.59   1
   6   5  12    0.48    0.45   1
   6   7  11   13.30    0.50   1
   6   9   9   94.47    0.93   1
   7   4  12    4.35    0.38   1
   7   8  10    5.11    0.37   1
   7   9   9    0.47    0.34   1
  -1  -1   8   17.24    0.32   1
  -1   0   9  455.77    1.39   1
  -1   5   8   29.42    0.52   1
   0   1  11  335.76    1.46   1
   0   2  11    0.04    0.54   1
   0   3  11    4.15    0.50   1
   0   5  10    8.11    0.61   1
   0   6   9   17.12    0.62   1
   0   7   7  387.93    1.53   1
   1   5  11   28.13    0.80   1
   2   6  11   42.10    0.82   1
   2   9   7   34.13    0.67   1
   3  -1  12   10.73    0.56   1
   3   5  12   41.70    0.82   1
   3   9   8    7.43    0.69   1
   4   5  12    7.07    0.65   1
   4   8  10   34.68    0.75   1
   5   5  12   10.41    0.55   1
   5   7  11    8.18    0.54   1
   5   8  10    0.49    0.59   1
   5   9   9    4.66    0.52   1
   5  10   7  120.91    1.06   1
   7   3  12    4.69    0.42   1
  -1   5   7  168.32    0.92   1
   0  -2   9    8.21    0.32   1
   0  -1  10    2.76    0.33   1
   0   7   4   88.53    0.61   1
   0   7   6   63.17    0.68   1
   1  -1  11    1.35    0.38   1
   1   6  10    4.35    0.56   1
   1   8   7   91.86    0.86   1
   2   9   6    9.05    0.53   1
   3   4  12   21.45    0.78   1
   6   0  12    4.46    0.46   1
   6   4  12   12.66    0.50   1
   6  10   7   23.25    0.63   1
   7   6  11   28.99    0.57   1
   8   5  11   32.29    0.57   1
   8   9   8   22.95    0.52   1
  -1   1   9  354.68    1.27   1
  -1   2   9  257.53    1.13   1
  -1   4   8   96.17    0.74   1
  -1   5   5   52.35    0.46   1
  -1   5   6  189.67    0.89   1
   0   6   8  152.77    1.06   1
   1   4  11   33.18    0.74   1
   1   8   6   13.54    0.51   1
   2   8   8    8.00    0.61   1
   2   9   5  105.98    0.88   1
   3   6  11   48.90    0.89   1
   3   8   9   17.84    0.74   1
   4   4  12   72.86    0.95   1
   6   6  11    3.57    0.55   1
   8   8   9    3.56    0.35   1
   0   0  10  158.89    0.96   1
   0   3  10    0.72    0.52   1
   0   5   9    9.88    0.50   1
   1   0  11  351.46    1.52   1
   1   3  11   85.66    0.99   1
   1   7   8   17.37    0.62   1
   1   8   4   26.30    0.42   1
   1   8   5  271.54    1.19   1
   3   2  12    0.53    0.50   1
   3   7  10   28.84    0.76   1
   4   0  12   26.46    0.64   1
   4   3  12   37.53    0.83   1
   4   6  11    6.05    0.63   1
   5   3  12  115.47    1.11   1
   5   6  11   15.58    0.65   1
   5   9   8  129.52    1.19   1
   5  10   6    1.86    0.58   1
   6   9   8   11.60    0.64   1
   7   9   8    6.16    0.54   1
   8   4  11    2.94    0.40   1
  -1   3   8  142.28    0.84   1
  -1   4   7  152.56    0.84   1
   0   1  10    3.09    0.37   1
   0   2  10  148.80    1.00   1
   1   1  11    1.39    0.43   1
   1   2  11  314.57    1.55   1
   1   6   9    3.16    0.51   1
   2   6  10  102.79    1.08   1
   2   7   9   16.91    0.65   1
   3   5  11    8.55    0.64   1
   4   1  12    3.83    0.54   1
   4   7  10    0.58    0.61   1
   4   8   9    0.44    0.55   1
   5   2  12   54.85    0.82   1
   5   7  10   66.64    0.99   1
   6   7  10    4.91    0.55   1
   6   8   9    0.56    0.58   1
   6  10   6   29.89    0.71   1
   7   8   9    9.38    0.50   1
   8   6  10   11.53    0.52   1
   9   7   9    4.51    0.36   1
   9   9   7    4.77    0.38   1
  -1   4   6    1.02    0.24   1
   0  -1   9  140.94    0.81   1
   0   4   9  120.93    0.93   1
   0   5   8  118.78    0.94   1
   2   8   7   13.92    0.53   1
   4   5  11   86.08    1.04   1
   5  10   5   47.86    0.78   1
   6   5  11   55.34    0.83   1
   7   4  11   37.99    0.73   1
   8   1  11    1.76    0.42   1
   8   2  11   10.21    0.49   1
   8   3  11    7.55    0.43   1
   9   5  10   19.85    0.48   1
   9   8   8    0.77    0.35   1
   0   6   5    1.24    0.33   1
   2   1  11  150.95    1.18   1
   2   2  11   -0.54    0.63   1
   2   3  11    1.68    0.55   1
   2   5  10   14.63    0.77   1
   3  -1  11    5.77    0.55   1
   5   9   7   46.67    0.88   1
   7   6  10    7.93    0.60   1
   8   7   9   19.26    0.61   1
   8   9   7    2.87    0.49   1
   0   1   9  130.99    0.87   1
   0   2   9    8.45    0.47   1
   0   3   9  435.56    1.59   1
   0   5   7   34.76    0.56   1
   1  -2   9  131.46    0.82   1
   1   3  10  288.87    1.48   1
   1   5   9   34.30    0.67   1
   1   6   8  124.46    1.00   1
   1   7   6    2.30    0.37   1
   2   6   9    6.77    0.65   1
   2   7   8    2.80    0.51   1
   4   4  11    6.11    0.61   1
   4   6  10   73.82    1.01   1
   4   8   8   23.73    0.74   1
   4   9   6    0.68    0.58   1
   5  -1  11    4.43    0.57   1
   5   6  10    0.13    0.68   1
   6   4  11   -0.61    0.53   1
   6   6  10   28.03    0.80   1
   6   9   7  110.39    1.12   1
   6  10   5   31.55    0.65   1
   7   0  11   40.22    0.74   1
   7   3  11    5.64    0.48   1
   7   9   7   15.29    0.60   1
   8   5  10    9.50    0.56   1
   8   8   8    2.23    0.44   1
   8  10   5    9.22    0.47   1
   9   4  10    0.24    0.35   1
  10   8   7    1.02    0.31   1
   0  -1   8  568.06    1.47   1
   0   4   8  461.37    1.59   1
   1   1  10  179.75    1.11   1
   1   2  10    0.37    0.43   1
   1   7   3   13.61    0.33   1
   2   4  10   76.30    1.00   1
   2   8   5   20.92    0.54   1
   3   0  11  121.06    1.05   1
   5   7   9   18.34    0.79   1
   6   3  11   57.41    0.93   1
   6   7   9   40.80    0.90   1
   6   8   8   67.19    0.98   1
   7   1  11    1.69    0.46   1
   7   2  11    3.96    0.50   1
   7   7   9   21.22    0.64   1
   7   8   8    0.08    0.58   1
   9   6   9   11.74    0.49   1
   9   9   6   29.52    0.61   1
   0   5   6   14.32    0.38   1
   1   4   9  270.44    1.40   1
   1   6   7   93.44    0.87   1
   2   7   7  126.58    1.06   1
   2   8   4   15.67    0.46   1
   3   7   8    2.66    0.70   1
   4   2  11   52.95    0.94   1
   5   0  11    2.40    0.61   1
   6   1  11    2.91    0.63   1
   6   2  11    6.90    0.57   1
   7   5  10   18.52    0.66   1
   9   2  10    3.30    0.47   1
   9   3  10   18.30    0.50   1
   9   7   8    5.24    0.51   1
   0   0   8 1119.68    2.14   1
   0   3   8    3.50    0.35   1
   0   4   7   38.93    0.53   1
   0   5   5    6.30    0.32   1
   1   5   8  447.40    1.71   1
   2   5   9    4.27    0.55   1
   3   8   6    6.76    0.61   1
   4   8   7   24.02    0.76   1
   4   9   5  200.24    1.25   1
   5   5  10    3.03    0.63   1
   6   5  10    9.50    0.67   1
   6   9   6    1.35    0.64   1
   8   4  10   35.52    0.71   1
   8   6   9    2.58    0.50   1
   9   1  10   13.20    0.47   1
  10   6   8    1.90    0.44   1
  10   9   5    1.67    0.42   1
   0   1   8  559.06    1.57   1
   0   2   8   18.39    0.41   1
   1   3   9   12.70    0.50   1
   1   6   6    1.65    0.40   1
   2   1  10    5.39    0.53   1
   2   2  10   72.09    0.87   1
   7   6   9   57.91    1.01   1
   8   3  10    0.89    0.54   1
   8   7   8    1.07    0.63   1
   8   8   7   17.92    0.68   1
   9   5   9    1.22    0.43   1
   1  -2   8  242.71    1.02   1
   1   0   9  141.12    0.91   1
   1   1   9   29.12    0.57   1
   1   2   9  127.92    0.95   1
   1   4   8    2.85    0.47   1
   2   7   6   51.19    0.67   1
   3  -1  10  131.86    1.02   1
   3   3  10   18.88    0.68   1
   3   5   9  155.69    1.33   1
   3   7   7    4.13    0.60   1
   3   8   5   42.76    0.70   1
   5   4  10    1.06    0.74   1
   5   6   9    2.80    0.64   1
   5   7   8    4.46    0.73   1
   5   9   5    2.50    0.59   1
   6   6   9   -0.41    0.64   1
   6   8   7    0.77    0.72   1
   7   7   8    4.36    0.73   1
   8   1  10    1.36    0.56   1
   8   2  10    3.35    0.57   1
   9   9   5    9.76    0.58   1
  10   3   9   10.31    0.44   1
  10   7   7   14.01    0.50   1
  10   8   6    7.01    0.45   1
   1   5   7   43.34    0.61   1
   2   6   7   22.04    0.64   1
   3   1  10  124.17    1.11   1
   3   2  10   -0.24    0.52   1
   4  -1  10    6.57    0.59   1
   4   8   6  155.08    1.24   1
   6   7   8   13.42    0.71   1
   7  -1  10    6.19    0.52   1
   7   3  10   20.22    0.71   1
   8   5   9   19.70    0.69   1
   9   4   9    8.30    0.61   1
   9   6   8   20.93    0.71   1
  10   1   9   17.82    0.55   1
  11   4   8    5.01    0.38   1
   0   1   7  152.26    0.80   1
   1   6   4  490.78    1.43   1
   2   3   9   69.17    0.84   1
   2   5   8   82.33    0.88   1
   6  -1  10    9.17    0.66   1
   6   3  10    2.06    0.64   1
   7   1  10    5.66    0.70   1
   7   2  10    5.92    0.59   1
   7   5   9    0.61    0.72   1
   7   9   5    5.67    0.66   1
   9   7   7   31.31    0.78   1
   9   8   6   30.94    0.76   1
  10   9   4    4.73    0.53   1
  11   3   8   11.48    0.48   1
   1  -1   8  194.50    0.94   1
   2   2   9  143.54    1.11   1
   3   8   3   11.72    0.41   1
   4   0  10  447.36    1.93   1
   4   1  10    6.29    0.56   1
   4   7   7  183.60    1.34   1
   5   8   6    7.07    0.58   1
   6   0  10   56.20    0.94   1
   6   5   9    5.71    0.68   1
   8   4   9    3.79    0.68   1
   8   6   8    9.36    0.66   1
   8   8   6    3.59    0.65   1
   9   3   9    0.17    0.48   1
  11   9   3    0.05    0.42   1
   1   1   8  191.68    1.03   1
   1   2   8  247.14    1.18   1
   1   4   7    3.75    0.36   1
   2   1   9   18.70    0.51   1
   2   4   8    6.81    0.55   1
   2   6   6    5.73    0.45   1
   4   8   5    0.77    0.48   1
   5   9   3    3.71    0.51   1
   6   6   8   19.85    0.85   1
   7   6   8   -0.46    0.66   1
   8   7   7    6.78    0.65   1
   9   9   4   40.27    0.79   1
  10   4   8   15.11    0.65   1
  10   6   7   14.17    0.57   1
  11   1   8    6.22    0.46   1
  11   2   8    0.66    0.39   1
  11   5   7   22.51    0.57   1
   2   5   7   14.30    0.50   1
   3   3   9   45.96    0.79   1
   3   6   7  252.73    1.43   1
   6   7   7    2.77    0.64   1
   7   9   4   98.65    1.09   1
  10   7   6    2.33    0.48   1
   1   5   5   57.51    0.56   1
   2  -2   8  253.64    1.11   1
   2   3   8  132.60    1.04   1
   3   0   9   10.31    0.55   1
   3   2   9  118.17    1.05   1
   4  -2   9   92.30    0.86   1
   4   3   9   41.21    0.88   1
   6   9   3   88.14    0.95   1
   7   3   9    5.19    0.76   1
   8  -1   9   10.34    0.66   1
   8   2   9    2.01    0.70   1
   8   5   8    1.16    0.60   1
   9   6   7    5.57    0.71   1
   9   8   5   20.67    0.79   1
  10   3   8    1.10    0.58   1
  10   9   3   14.48    0.61   1
  11   6   6    3.53    0.46   1
  11   8   4    0.82    0.42   1
  12   2   7    0.56    0.35   1
   1   4   6  268.92    1.14   1
   2   6   5    0.81    0.30   1
   3   1   9    3.03    0.46   1
   4  -1   9   91.17    0.94   1
   4   6   7    0.66    0.54   1
   5  -2   9    4.20    0.47   1
   5   5   8    7.20    0.76   1
   6   3   9    3.07    0.64   1
   7   5   8    9.69    0.81   1
   8   1   9   11.56    0.64   1
   8   8   5   -0.71    0.71   1
   9   4   8    0.86    0.59   1
   9   9   3    1.62    0.59   1
  10  -1   8    2.49    0.53   1
  10   2   8   17.11    0.67   1
  11   4   7    7.22    0.50   1
  11   7   5    4.99    0.47   1
  12   6   5    0.83    0.45   1
   1   2   7  751.02    1.87   1
   2   2   8  249.82    1.27   1
   2   4   7  101.25    0.86   1
   3   5   7   15.41    0.56   1
   4   1   9   85.00    1.01   1
   4   8   3    0.45    0.44   1
   5  -1   9   44.00    0.81   1
   5   2   9    4.30    0.69   1
   7   8   5   28.43    0.77   1
   8   6   7   -0.75    0.66   1
   8   7   6   -0.23    0.74   1
  10   0   8   49.19    0.85   1
  12   7   4    5.07    0.44   1
  13   6   4   14.28    0.48   1
   1   0   7   70.17    0.58   1
   1   1   7    0.67    0.26   1
   2   0   8  641.55    1.85   1
   2   1   8  133.87    0.92   1
   3  -2   8    2.50    0.39   1
   3   3   8  169.57    1.19   1
   4   4   8   34.59    0.76   1
   4   7   5  134.19    1.09   1
   5   0   9   28.33    0.80   1
   5   8   4    5.03    0.52   1
   7   6   7    0.92    0.65   1
   7   7   6    7.12    0.67   1
   8   4   8    2.29    0.68   1
   9   5   7    0.16    0.74   1
  10   6   6   11.03    0.65   1
  10   7   5   24.91    0.77   1
  10   9   2   11.38    0.62   1
  11   3   7    4.51    0.52   1
  11   5   6    5.60    0.63   1
   1   4   5  661.46    1.64   1
   2   3   7  184.94    1.09   1
   3   7   3   46.27    0.57   1
   4   5   7  132.09    1.20   1
   5   4   8    3.09    0.62   1
   9   8   4   -0.66    0.69   1
  10   4   7    0.35    0.57   1
  11   2   7   11.34    0.63   1
  11   8   3    7.83    0.60   1
  13   4   5    6.95    0.43   1
   2  -2   7   15.08    0.36   1
   3  -1   8  206.14    1.16   1
   3   4   7  235.74    1.32   1
   4   3   8   10.03    0.59   1
   8  -2   8   27.46    0.75   1
   8   3   8    0.67    0.67   1
   8   5   7   18.23    0.82   1
   8   8   4   49.05    0.94   1
   9  -1   8   54.03    0.86   1
   9   7   5    0.13    0.71   1
  11  -1   7    2.65    0.45   1
  11   1   7    2.98    0.59   1
  11   6   5   35.82    0.75   1
  11   7   4   37.82    0.80   1
  12   3   6   -0.25    0.42   1
  12   8   2   63.93    0.79   1
   1   2   6  221.66    0.97   1
   2   4   6  477.58    1.61   1
   3   1   8  208.80    1.22   1
   3   7   2    9.41    0.35   1
   4  -2   8  369.90    1.56   1
   5   5   7   12.88    0.66   1
   5   6   6    0.84    0.56   1
   6   3   8    0.75    0.76   1
   7   5   7    2.03    0.69   1
   9   4   7   28.09    0.90   1
  10   3   7   46.28    0.90   1
  10   5   6    6.80    0.80   1
  10   8   3   10.65    0.74   1
  11   4   6    1.31    0.63   1
  12   2   6    5.81    0.56   1
  12   6   4   17.48    0.65   1
  12   7   3   13.03    0.62   1
   2  -1   7    5.50    0.34   1
   5  -2   8   17.39    0.63   1
   6   6   6   34.41    0.82   1
   6   8   3   12.72    0.63   1
  10  -2   7    1.23    0.59   1
  12  -1   6    1.37    0.49   1
  12   1   6    1.85    0.53   1
  13   6   3   22.32    0.60   1
  13   7   2   19.09    0.52   1
   2   1   7    6.54    0.34   1
   4   0   8  112.36    0.97   1
   4   1   8    2.41    0.46   1
   4   6   5   32.50    0.62   1
   6  -2   8   49.24    0.78   1
   8   4   7   45.10    0.95   1
   9   8   3   69.70    0.99   1
  10   2   7    1.29    0.62   1
  12   0   6    1.32    0.46   1
  13   2   5    2.85    0.44   1
   2   3   6   31.78    0.51   1
   3   4   6  150.05    1.05   1
   4   7   3  228.94    1.18   1
   6  -1   8    0.48    0.61   1
   6   0   8    7.72    0.67   1
  10  -1   7   22.30    0.69   1
  10   1   7   22.94    0.74   1
  10   4   6   29.06    0.90   1
  11   3   6   14.66    0.69   1
  11   5   5    0.11    0.59   1
  11   7   3   55.10    0.97   1
  13  -1   5    1.08    0.42   1
  13   0   5    4.74    0.49   1
  13   1   5    0.96    0.47   1
  13   4   4    5.38    0.58   1
   3  -2   7    7.54    0.38   1
   3   2   7    7.29    0.42   1
   3   5   5   28.46    0.52   1
   5   6   5   20.59    0.62   1
   6   8   2   78.53    0.89   1
   9  -2   7   44.02    0.88   1
   9   2   7   42.63    0.96   1
   9   6   5   58.20    1.01   1
  11   2   6    2.56    0.70   1
  11   6   4    3.49    0.62   1
  12   5   4    0.64    0.63   1
  14   1   4    2.62    0.38   1
  14   4   3    4.39    0.42   1
  14   7   0    2.86    0.43   1
   3   1   7   54.17    0.65   1
   5   3   7    0.12    0.52   1
   7   5   6   28.05    0.84   1
   7   7   4   12.52    0.65   1
  11  -2   6    2.81    0.53   1
  12   7   2    1.45    0.56   1
   3  -3   7   24.54    0.55   2
   4   0   4   57.54    0.67   2
   5  -1   5   19.56    0.59   2
   7  -8   7   14.55    0.82   2
   7   1   1  125.03    1.03   2
   8  -5   6   19.31    1.04   2
   8   0   2  388.88    2.00   2
  10   1  -3   57.85    0.89   2
  12  -5   2    3.90    0.83   2
  13  -9   1    9.88    0.58   2
  13  -2  -2   92.79    1.45   2
  14  -4  -2   36.76    0.99   2
  14  -3  -3    4.31    0.91   2
   4  -3   7   24.50    0.65   2
   6   1   2   44.83    0.72   2
   7  -7   7    1.21    0.67   2
   7  -6   7    3.90    0.85   2
   7   0   3  484.73    2.14   2
   9  -4   5    5.35    1.00   2
  12   0  -4   22.60    0.82   2
   6  -4   7    3.41    0.69   2
   8   1   1  329.20    1.80   2
  10  -8   5    1.02    0.65   2
  10  -7   5   24.25    0.83   2
  10  -6   5   -0.42    0.86   2
  10  -1   2   46.30    1.11   2
  10   1  -2  166.72    1.34   2
  11  -8   4    0.16    0.57   2
  11  -7   4   38.18    0.96   2
  11  -6   4    2.96    0.90   2
  11   0  -1  117.54    1.34   2
  12  -8   3    9.43    0.69   2
  13  -3   0    7.30    1.02   2
  14  -7   0    4.28    0.56   2
  15  -5  -3    1.19    0.63   2
  15  -4  -4    7.33    0.77   2
   6   0   4  134.09    1.17   2
   7   1   2   10.51    0.56   2
   8  -2   5    1.96    0.96   2
   9  -8   6   30.16    0.85   2
   9  -7   6    2.49    0.68   2
   9   1   0   25.59    0.71   2
  11  -3   3    7.54    1.11   2
  12  -6   3   -0.25    0.69   2
  13  -2  -1   78.24    1.28   2
  14  -4  -1   24.09    0.88   2
  14  -3  -2    3.41    0.80   2
  15  -6  -2    6.16    0.61   2
   3  -2   7    8.20    0.52   2
   3  -1   6  917.08    2.43   2
   4  -4   8   34.63    0.84   2
   5  -5   8    6.88    0.65   2
   5   1   3    7.81    0.44   2
   8   2  -2   32.27    0.61   2
   9  -9   6   27.86    0.75   2
  10   1  -1   29.96    0.80   2
  12  -5   3   17.86    1.01   2
  12  -3   2    0.48    1.01   2
  13  -8   2    0.67    0.49   2
  13  -7   2   19.29    0.72   2
  13  -1  -2   28.90    1.09   2
  14  -2  -3    2.78    0.82   2
   2  -2   7   15.23    0.47   2
   3   0   5    7.94    0.42   2
   5  -1   6  179.04    1.40   2
   6  -6   8   22.17    0.90   2
   6  -3   7    9.53    0.70   2
   6   1   3   74.52    0.87   2
   7   2   0   96.73    0.92   2
   8  -8   7   19.22    0.80   2
   8  -7   7    6.79    0.69   2
   8  -6   7    0.03    0.86   2
   8   2  -1  523.77    2.01   2
  11  -4   4   -0.16    1.03   2
  11   1  -3    2.30    0.57   2
  15  -3  -4   17.42    0.79   2
   5  -4   8    2.37    0.68   2
   5  -2   7    5.84    0.70   2
   5   0   5   44.07    0.74   2
   9  -1   4   42.28    1.10   2
  10  -4   5    4.94    0.89   2
  10  -1   3   58.35    1.22   2
  11  -2   3   21.88    1.24   2
  11   1  -2   33.57    0.91   2
  13  -5   2   41.22    0.99   2
  13  -2   0    0.72    0.82   2
  14  -2  -2   46.92    1.18   2
   4  -3   8   10.02    0.64   2
   6  -1   6   23.69    0.78   2
   6   2   1   93.38    0.85   2
   7   1   3    4.52    0.58   2
   8  -1   5   88.75    1.37   2
   8   2   0  408.87    1.90   2
   9  -4   6    5.62    0.82   2
   9   2  -2   72.16    0.84   2
  10   0   2    2.81    0.82   2
  11  -7   5    4.85    0.66   2
  12  -7   4    5.79    0.64   2
  12  -2   2   14.53    1.13   2
  12  -1   1   31.39    1.18   2
  13  -4   2   29.10    1.07   2
  13  -1  -1   15.93    0.92   2
  14  -6   1   -0.44    0.52   2
  15  -4  -2    7.71    0.65   2
  15  -3  -3   10.71    0.79   2
   4   1   4  252.09    1.28   2
   5   1   4  423.50    1.80   2
   7  -7   8    5.32    0.63   2
   7  -6   8   -0.21    0.79   2
   7  -3   7    7.47    0.76   2
   7   2   1  590.15    2.14   2
   9   1   2  141.32    1.47   2
   9   2  -1   93.40    1.01   2
  10  -7   6    2.76    0.62   2
  11  -6   5   34.19    0.91   2
  11   1  -1    1.06    0.68   2
  12  -8   4   21.05    0.63   2
  12  -6   4   17.84    0.76   2
  12  -3   3    3.59    0.97   2
  14  -3   0   37.25    1.03   2
   5  -3   8  135.51    1.34   2
   6   1   4   37.28    0.75   2
   6   2   2   33.80    0.68   2
   8   2   1    2.49    0.59   2
   9  -7   7   30.13    0.88   2
  10  -5   6    4.68    0.83   2
  10   1   1   95.63    1.26   2
  10   2  -3   78.64    0.95   2
  11  -5   5    1.04    0.71   2
  12  -5   4    1.00    0.67   2
  12   1  -3  162.64    1.50   2
  13  -7   3    3.33    0.52   2
  13  -6   3   22.56    0.74   2
  14  -2  -1    2.16    0.74   2
  15  -4  -1    2.25    0.65   2
   4  -1   7  103.50    1.03   2
   4   0   6 1038.82    2.84   2
   7   2   2    2.60    0.60   2
   9  -8   7    3.22    0.49   2
   9  -6   7    6.40    0.71   2
   9   2   0   55.47    0.88   2
  10   2  -2    8.67    0.56   2
  11  -4   5    8.52    0.95   2
  11   1   0   53.85    1.07   2
  12   1  -2   84.34    1.27   2
  13  -5   3    0.35    0.62   2
  14  -4   1    1.14    0.63   2
   2  -1   7    6.01    0.36   2
   3  -2   8    1.97    0.42   2
   4  -4   9    0.39    0.62   2
   6  -3   8    0.18    0.67   2
   7  -2   7    8.09    0.78   2
   8  -3   7   75.25    1.28   2
  10  -4   6   32.17    0.97   2
  10  -2   5    0.83    0.84   2
  10   2  -1   25.58    0.76   2
  11  -2   4   14.41    1.00   2
  12  -4   4    2.35    0.72   2
  12  -1   2    2.52    0.84   2
  13   0  -1  122.45    1.55   2
  14  -2   0    7.91    0.84   2
   2  -2   8  240.32    1.32   2
   2   0   6  621.56    1.88   2
   4   1   5    5.67    0.44   2
   5  -2   8   16.34    0.84   2
   5   1   5   18.96    0.61   2
   5   2   3   78.94    0.82   2
   6   2   3   14.90    0.57   2
   8  -7   8    0.92    0.59   2
   9  -2   6   -0.15    0.81   2
   9   2   1  223.50    1.62   2
  10   1   2   49.06    1.09   2
  11  -3   5    8.92    0.99   2
  11   2  -3   68.02    1.00   2
  13  -4   3   26.90    0.87   2
  13  -2   2    0.42    0.89   2
  14  -5   2    1.37    0.52   2
  14  -3   1   42.43    0.95   2
  14  -1  -1   32.17    1.06   2
   6  -5   9    5.90    0.76   2
   7   2   3  275.62    1.72   2
   8  -5   8    1.62    0.67   2
  10  -3   6    0.25    0.82   2
  11  -7   6    5.19    0.54   2
  11  -6   6    3.24    0.63   2
  11   2  -2   27.12    0.86   2
  12  -3   4    4.48    0.79   2
  15  -4   0   21.78    0.69   2
   3  -3   9   48.91    0.79   2
   4  -3   9   41.84    0.91   2
   6  -2   8   45.09    0.97   2
   7  -1   7   28.19    1.04   2
   7   3   0   39.78    0.69   2
   8  -2   7    1.62    0.78   2
  10  -6   7   11.43    0.70   2
  10  -1   5   56.72    1.28   2
  11  -5   6    5.79    0.70   2
  11   2  -1    7.79    0.86   2
  12  -5   5   11.53    0.72   2
  12  -1   3    6.29    1.02   2
  13  -6   4   13.51    0.61   2
   3  -1   8  213.36    1.41   2
   3   0   7   13.97    0.58   2
   4  -1   8    1.90    0.64   2
   5  -3   9   11.14    0.80   2
   6   2   4  164.50    1.34   2
   6   3   0  518.98    1.80   2
   8   2   3    7.94    0.70   2
   8   3   0   65.15    0.93   2
  10   1   3   54.75    1.17   2
  12  -2   4    9.85    0.97   2
  13   1  -2   28.14    1.00   2
  14  -2   1   13.80    0.75   2
  14  -1   0    9.39    0.87   2
  15  -2  -1    4.70    0.67   2
   4   1   6    3.49    0.45   2
   4   2   4  304.89    1.46   2
   5  -1   8  120.20    1.27   2
   6   3   1  204.34    1.23   2
   7  -5   9    0.60    0.71   2
   7   2   4  177.05    1.55   2
   7   3   1  137.68    1.12   2
   8   0   6  104.40    1.41   2
   8   1   5   86.89    1.40   2
   9   3  -2    9.71    0.48   2
   9   3  -1  249.02    1.56   2
  11  -4   6    1.19    0.63   2
  11   2   0    1.50    0.73   2
  12   1   1   31.13    1.15   2
  12   2  -3    0.47    0.69   2
  13  -4   4    5.04    0.68   2
  13  -1   2    2.54    0.79   2
  13   0   1   69.01    1.30   2
  15  -4   1    5.33    0.52   2
   2  -1   8  138.49    1.04   2
   3  -2   9  120.20    1.18   2
   3   1   6  910.73    2.49   2
   6  -3   9    2.41    0.76   2
   6   1   6   23.64    0.79   2
   6   3   2   24.88    0.66   2
   8   3   1  131.54    1.20   2
   9  -5   8   13.89    0.71   2
   9  -2   7   43.90    1.09   2
  10   2   2   49.91    1.10   2
  12  -3   5    1.38    0.76   2
  13   1  -1   15.83    0.86   2
   5  -2   9    5.04    0.82   2
   5   2   5   22.31    0.71   2
   5   3   2  108.02    0.91   2
   7  -4   9    6.84    0.68   2
   7   3   2   96.20    1.04   2
   9  -4   8   -0.17    0.74   2
  10  -3   7   45.90    1.10   2
  10   3  -2    2.32    0.51   2
  10   3  -1  116.83    1.28   2
  11   1   3   14.39    1.11   2
  13  -3   4    1.90    0.70   2
  14  -1   1   10.34    0.71   2
  15  -3   1   -0.78    0.51   2
   4   2   5  231.80    1.37   2
   6   2   5  135.87    1.29   2
   6   3   3    3.93    0.61   2
   8  -2   8   26.75    0.96   2
   9   3   1    0.92    0.59   2
  10  -1   6    2.87    0.86   2
  10   3   0   60.95    1.12   2
  13  -1   3   13.07    0.91   2
  14   0   0   23.97    0.97   2
   1  -1   8  183.90    1.06   2
   4   1   7   99.42    1.11   2
   5   3   3  437.51    1.82   2
   7   3   3    0.77    0.57   2
   8   1   6   20.88    1.07   2
   9  -3   8    8.32    0.73   2
   9  -1   7   -0.14    0.77   2
  11   3  -2   14.51    0.79   2
  12  -2   5    0.85    0.67   2
  14  -3   3   30.34    0.74   2
  14   1  -2   12.32    0.83   2
   3  -1   9    2.58    0.58   2
   3   1   7   53.04    0.80   2
   4  -1   9   89.05    1.16   2
   4   3   3    7.57    0.47   2
   6   0   8    8.69    0.90   2
   6   1   7    4.96    0.71   2
   8  -4   9    3.88    0.61   2
   9   3   2  104.99    1.28   2
  10  -2   7    0.26    0.73   2
  11  -4   7    7.52    0.62   2
  11   3  -1   27.90    0.90   2
  12  -4   6    1.48    0.50   2
  13  -4   5    6.65    0.56   2
   2   0   8  599.77    2.12   2
   4   2   6  226.38    1.44   2
   5  -3  10   11.42    0.77   2
   5  -1   9   45.08    0.96   2
   6  -4  10    1.88    0.67   2
   7  -2   9   26.58    0.94   2
   7   1   7   25.86    1.06   2
   8  -3   9    3.11    0.77   2
   8  -1   8   12.66    0.84   2
   9  -2   8    2.62    0.81   2
  10   1   5   56.67    1.23   2
  12  -3   6    0.56    0.60   2
  12   0   4   38.75    1.03   2
  12   1   3    5.86    1.03   2
  12   2   1    4.35    0.76   2
  14  -2   3    5.03    0.62   2
   2  -1   9   18.47    0.55   2
   4   3   4    4.68    0.50   2
   7   2   6   10.00    0.92   2
   7   4   0   74.98    0.88   2
  10  -4   8   14.11    0.65   2
  11  -1   6   41.68    1.05   2
  11   2   3   24.73    1.00   2
  13  -1   4    3.48    0.74   2
  15   0  -1   12.20    0.71   2
   3  -2  10   -0.24    0.55   2
   3   2   6    4.82    0.42   2
   4  -2  10  109.53    1.21   2
   6  -3  10    2.22    0.60   2
   6   4   0  358.42    1.58   2
   6   4   1  521.50    2.00   2
   7   4  -1  389.33    1.63   2
   8   4  -2   71.58    0.79   2
   8   4  -1    7.18    0.45   2
   8   4   0   13.61    0.58   2
   9  -5   9    0.51    0.49   2
  10  -3   8    0.36    0.66   2
  13   1   2    3.41    0.73   2
  13   2   0   -0.10    0.73   2
  14   1   0    7.03    0.70   2
   4   1   8    2.41    0.54   2
   5   1   8  122.26    1.32   2
   5   2   7    5.56    0.75   2
   6   1   8    0.34    0.84   2
   6   3   5   36.21    0.86   2
   6   4   2  251.20    1.52   2
   7  -4  10    0.58    0.51   2
   7   3   5   56.68    1.14   2
   8  -2   9    3.19    0.69   2
   8   2   6   23.37    0.99   2
   9  -4   9    7.87    0.57   2
   9  -1   8   55.98    1.13   2
  11  -2   7   11.59    0.69   2
  12   3   0    1.62    0.85   2
  13  -2   5    2.34    0.59   2
  14   0   2    3.98    0.60   2
   3   0   9   10.41    0.57   2
   4   2   7    0.59    0.52   2
   4   3   5   13.65    0.55   2
   5   4   1  563.50    1.93   2
   6  -2  10   47.01    1.04   2
   7  -3  10   18.40    0.84   2
   9   3   4  185.65    1.75   2
   9   4   1  128.37    1.32   2
  10  -2   8   17.22    0.80   2
  10   2   5   -0.03    1.01   2
  10   4  -2   61.47    0.93   2
  10   4  -1   45.01    0.87   2
  10   4   0  121.75    1.40   2
  11   2   4   14.68    1.07   2
  11   3   2    5.00    0.81   2
  12   1   4   13.07    0.82   2
  13   2   1    3.04    0.78   2
  14   1   1   11.31    0.82   2
   1   1   7    0.43    0.34   2
   2   2   6  163.06    1.06   2
   3  -1  10  122.64    1.26   2
   4  -1  10    6.36    0.63   2
   5   4   2   22.15    0.55   2
   6   4   3   33.39    0.75   2
   8   4   3   17.10    0.95   2
   9   1   7    0.40    0.84   2
   9   2   6   -1.11    0.83   2
  10   4   1   11.61    0.90   2
  11  -1   7    3.81    0.75   2
  12  -1   6    1.94    0.68   2
  13   1   3   12.41    0.77   2
   2   1   8  136.63    1.08   2
   3   3   5  300.23    1.48   2
   4   3   6    0.86    0.61   2
   6   3   6   -0.03    0.67   2
   6   4   4   64.87    1.04   2
   7  -2  10    5.63    0.73   2
   7   0   9   10.72    0.84   2
   7   3   6   90.29    1.41   2
   9  -2   9    9.07    0.77   2
  13  -1   5    1.88    0.52   2
  13   3  -1    0.44    0.78   2
  15   1  -1    1.21    0.52   2
   2  -1  10    2.51    0.44   2
   4   1   9   90.74    1.21   2
   5   1   9   43.47    1.07   2
   6  -1  10    9.21    0.75   2
   7   4   4    0.62    0.67   2
   8   1   8   11.98    0.87   2
   8   2   7    1.87    0.82   2
  11  -3   8   10.66    0.53   2
  11   1   6   41.82    1.13   2
  12   3   2    0.66    0.90   2
  14  -1   4    2.86    0.49   2
   1   0   9  118.85    0.99   2
   3   1   9    3.14    0.63   2
   4   4   3  170.25    1.14   2
   6   2   8   51.95    1.09   2
   8   4   4   54.68    1.11   2
   9  -1   9   -0.19    0.68   2
  12  -2   7    0.56    0.48   2
  12   0   6    1.64    0.70   2
  12   2   4   10.70    0.83   2
  13   1   4    2.38    0.70   2
   1   1   8  186.78    1.16   2
   2   3   5  786.00    2.22   2
   3   2   8    1.52    0.49   2
   5   3   7    0.37    0.64   2
   5   4   5   41.56    0.84   2
   6   3   7    9.91    0.80   2
   6   4   5    8.74    0.70   2
   7  -1  10    5.82    0.71   2
   9   1   8   55.67    1.24   2
   9   2   7   42.51    1.11   2
  11  -2   8    0.22    0.43   2
  11   3   4    6.32    0.89   2
  13   0   5    4.58    0.54   2
  13   2   3    2.97    0.72   2
  14   2   1   14.34    0.72   2
   4   4   5   41.02    0.81   2
   7   1   9    4.77    0.76   2
   7   5   0  357.45    1.77   2
   7   5   1  537.74    2.24   2
   8   4   5    1.60    0.81   2
   8   5   0   41.52    0.78   2
   8   5   1  133.92    1.29   2
   9   5   0   49.47    1.00   2
  11   4   2    0.95    0.78   2
  12   3   3    3.09    0.71   2
  12   4   0    6.55    0.75   2
  14   0   4    1.68    0.48   2
   2   0  10  195.36    1.39   2
   2   2   8  240.59    1.47   2
   2   3   6   33.14    0.66   2
   3   3   7   23.58    0.65   2
   3   4   3 1102.09    2.60   2
   5  -1  11    5.63    0.73   2
   6  -2  11    7.49    0.60   2
   6   4   6    4.48    0.84   2
   6   5   1   59.87    0.79   2
   6   5   2   15.73    0.59   2
   7   5  -1  265.11    1.41   2
   7   5   3    2.85    0.75   2
   8  -1  10    2.32    0.71   2
   8   2   8   27.41    1.01   2
   8   3   7   77.81    1.42   2
   8   5  -1  607.33    2.24   2
   8   5   2  149.94    1.42   2
   9   0   9   33.58    0.94   2
   9   5  -1   35.36    0.74   2
   9   5   1    0.52    0.65   2
  11  -1   8    6.45    0.53   2
  11   2   6    3.64    0.84   2
  12   4   1    2.31    0.86   2
   1   2   7  706.80    2.12   2
   3   4   4  171.20    1.14   2
   4   1  10    7.04    0.78   2
   4   2   9   90.51    1.17   2
   5   2   9    4.82    0.72   2
   6   5   0  882.92    2.48   2
   6   5   3  278.29    1.72   2
   7   4   6   27.42    0.98   2
   8   1   9   10.53    0.81   2
   8   5   3  139.00    1.46   2
   9   4   5    4.77    0.85   2
   9   5   2  118.07    1.38   2
  10   3   6    0.32    0.93   2
  10   5   0   34.83    0.88   2
  10   5   1   75.29    1.28   2
  11   3   5    9.88    0.85   2
  12   1   6    1.23    0.59   2
  12   2   5    1.26    0.66   2
  14   3   0   36.32    0.90   2
   1   1   9   26.58    0.61   2
   3   2   9  124.33    1.23   2
   3   4   5  345.99    1.67   2
   4   4   6   11.42    0.63   2
   5   5   1  240.90    1.37   2
   5   5   2   10.79    0.50   2
   6  -1  11    4.40    0.63   2
   6   3   8   -0.17    0.77   2
   6   5   4    1.31    0.62   2
   7  -2  11    3.44    0.59   2
   7   2   9   25.93    1.05   2
   7   3   8   94.52    1.46   2
   7   5   4   62.96    1.10   2
   9   2   8    2.54    0.89   2
   9   3   7   32.23    1.17   2
  10   1   8    0.83    0.65   2
  12   3   4    5.50    0.73   2
  12   4   2    5.95    0.79   2
  13   2   4    8.88    0.64   2
   5   0  11    2.83    0.76   2
   5   4   7   42.68    1.05   2
   5   5   4   12.55    0.64   2
   6   4   7    5.42    0.79   2
   6   5  -1  372.30    1.51   2
   8   0  10   11.25    0.70   2
   8   5   4   14.72    0.88   2
   9   1   9    0.50    0.72   2
  10   4   5    4.48    0.83   2
  11   5  -1   33.07    0.83   2
  13   3   3    0.96    0.64   2
  13   4   0   46.71    0.94   2
  14   1   4    2.68    0.47   2
  14   2   3    3.30    0.56   2
  14   3   1   43.08    0.94   2
   0   1   8  506.49    1.71   2
   1   2   8  237.06    1.33   2
   2   1  10    3.97    0.50   2
   2   2   9  141.89    1.22   2
   3   0  11  120.90    1.25   2
   5   5   0  697.89    2.06   2
   5   5   5   58.87    1.06   2
   7  -1  11    1.39    0.63   2
   7   5   5    2.66    0.77   2
   8   2   9    2.83    0.87   2
   8   3   8    1.36    0.78   2
  12   4   3    0.40    0.69   2
  13   4   1  114.45    1.35   2
   4   2  10  115.57    1.38   2
   4   5   4    6.26    0.52   2
   5   3   9   11.49    0.81   2
   6   3   9    2.70    0.91   2
   8   4   7   49.84    1.16   2
  10   2   8   16.45    0.85   2
  11   2   7   11.43    0.71   2
  11   3   6   13.66    0.79   2
  11   5   2    7.05    0.85   2
  12   3   5    1.14    0.64   2
   2   3   8  134.12    1.16   2
   2   4   5  104.98    0.92   2
   3   2  10    0.42    0.69   2
   4   5   5   48.76    0.85   2
   6   2  10   44.92    1.03   2
   7   0  11   41.05    0.94   2
   8   1  10    1.29    0.59   2
   8   6   1    1.23    0.75   2
   9   3   8    8.25    0.92   2
   9   5   5    1.01    0.81   2
  10   4   6   32.39    1.00   2
  10   5   4    0.85    0.77   2
  11   4   5    7.64    0.80   2
  12   5   1  101.31    1.35   2
  13   3   4    2.55    0.59   2
  13   4   2   29.72    0.85   2
   0   2   7  164.47    0.99   2
   1   3   7    8.94    0.43   2
   2   4   6  525.83    2.02   2
   7   2  10    6.21    0.82   2
   7   3   9    6.51    0.85   2
   7   6   2   12.50    0.66   2
   8  -1  11    0.99    0.49   2
   8   6   0  198.25    1.45   2
   8   6   2   76.24    1.13   2
   8   6   3   13.43    0.95   2
   9   2   9   10.30    0.71   2
   9   4   7   30.27    1.03   2
   9   6   0    4.41    0.69   2
  10   1   9   18.62    0.67   2
   2   2  10   74.28    1.00   2
   3   4   8   70.24    1.08   2
   3   5   4  491.30    1.97   2
   4   5   6   36.62    0.85   2
   6   6   1  166.07    1.31   2
   8   3   9    2.75    0.91   2
   8   6  -1   20.28    0.67   2
   9   6  -1  123.46    1.22   2
  10   5   5   73.21    1.37   2
  10   6   0  188.31    1.63   2
  13   4   3   25.24    0.83   2
   0   2   8   17.79    0.49   2
   1   3   8  279.12    1.53   2
   2   1  11  152.99    1.33   2
   2   3   9   70.23    0.96   2
   2   4   7  107.31    1.05   2
   4   0  12   24.71    0.84   2
   5   3  10   10.87    0.94   2
   5   5   7   13.22    0.82   2
   5   6   3  167.33    1.41   2
   8   2  10    3.94    0.70   2
   8   4   8    2.06    0.82   2
   8   6   4    4.34    0.82   2
  10   3   8    0.20    0.71   2
  10   6  -1   14.86    0.65   2
  10   6   2   23.59    0.92   2
  11   2   8    0.48    0.53   2
  11   3   7    4.31    0.61   2
  11   4   6    1.90    0.75   2
  11   5   4    3.23    0.73   2
  12   2   7    0.44    0.46   2
  12   3   6    0.57    0.51   2
  13   5   0   67.72    1.11   2
  14   4   1    0.51    0.52   2
   3   5   6  271.30    1.66   2
   5   6   4    8.03    0.66   2
   6   3  10    2.86    0.72   2
   6   4   9    8.23    0.83   2
   6   6   0  197.20    1.27   2
   8   5   7   18.96    0.95   2
   9   6   4   -0.31    0.77   2
  10   4   7    0.83    0.69   2
  10   6   3  100.01    1.36   2
  11   6   1  146.61    1.57   2
  12   4   5    6.62    0.62   2
  12   5   3   18.45    0.81   2
   0   1  10    1.54    0.44   2
   1   1  11    1.08    0.52   2
   2   4   8    9.83    0.58   2
   3   2  11    9.85    0.69   2
   3   4   9   40.84    0.99   2
   5   5   8    7.64    0.97   2
   5   6   1  553.41    2.08   2
   6   0  12    3.85    0.58   2
   6   2  11    7.89    0.74   2
   7   4   9    7.70    0.85   2
   9   3   9    0.95    0.61   2
  10   5   6    6.90    0.88   2
  11   5   5    0.42    0.75   2
  11   6   2    5.45    0.72   2
   1   4   6  263.28    1.38   2
   2   2  11    0.43    0.66   2
   2   5   4  288.80    1.49   2
   4   1  12    3.49    0.72   2
   4   5   8   44.53    1.02   2
   4   6   4  187.89    1.42   2
   7   2  11    4.13    0.72   2
   7   5   8   12.00    0.93   2
   8   1  11    1.54    0.48   2
   9   6   5   62.93    1.21   2
  10   6   4    8.05    0.78   2
  12   5   4    0.23    0.61   2
   0   3   7  114.16    0.90   2
   1   4   7    3.76    0.43   2
   2   5   3 1349.67    2.92   2
   4   6   2  527.72    2.05   2
   5   4  10    0.77    0.84   2
   5   6   0    4.66    0.38   2
   8   3  10    0.11    0.58   2
   8   4   9    5.67    0.75   2
   8   5   8    1.58    0.90   2
   8   6   6    7.86    0.86   2
  12   4   6    2.37    0.55   2
  12   6   1   12.23    0.78   2
   2   4   9   10.17    0.63   2
   3   5   8  103.44    1.24   2
   4   3  11    3.04    0.71   2
   6   4  10    1.35    0.75   2
   7   6   7    2.31    1.00   2
   7   7   3    4.86    0.72   2
   8   7   2    1.71    0.70   2
  10   3   9   10.79    0.62   2
  10   4   8   14.95    0.71   2
  11   6   4    2.73    0.78   2
   0   2  10  142.69    1.15   2
   1   3  10  280.16    1.72   2
   1   4   8    1.65    0.45   2
   3   6   4   86.68    0.98   2
   3   6   5  158.24    1.32   2
   4   2  12   31.64    0.94   2
   4   5   9   17.61    0.86   2
   4   6   1  117.75    0.96   2
   4   6   7    0.99    0.82   2
   5   2  12   55.61    1.04   2
   6   5   9    6.29    0.82   2
   6   7   3  112.80    1.29   2
   7   5   9   -0.13    0.88   2
   8   2  11    9.68    0.61   2
   8   6   7    0.02    0.88   2
   9   4   9    9.37    0.68   2
   9   7   0   13.42    0.69   2
   9   7   3   11.71    0.82   2
  12   5   5   10.19    0.58   2
  -1   2   8    0.71    0.32   2
   3   2  12    0.19    0.58   2
   3   5   9  167.01    1.65   2
   3   6   3  535.73    2.07   2
   5   7   3    1.54    0.71   2
   6   6   8   22.65    1.08   2
   6   7   1  445.70    2.07   2
   7   3  11    7.13    0.72   2
   7   7   0   89.46    1.04   2
   8   7   5  115.57    1.60   2
   9   3  10   17.58    0.62   2
   9   7   4   17.36    0.91   2
  10   6   6   10.14    0.84   2
  10   7   3    3.47    0.94   2
  12   6   3    0.72    0.59   2
   0   3   9  422.81    1.83   2
   1   4   9  256.83    1.60   2
   2   4  10   78.15    1.09   2
   5   6  -1  187.38    1.07   2
   5   7   2  361.32    1.89   2
   6   2  12   51.47    0.90   2
   7   6   8    0.70    0.81   2
   7   7   6    7.59    0.98   2
   8   4  10   35.65    0.86   2
   8   7  -1   99.66    1.07   2
   9   6   7    6.85    0.77   2
  11   4   8    3.62    0.51   2
  13   5   4    3.53    0.39   2
  -1   2   9  249.45    1.29   2
   0   4   6   65.14    0.71   2
   1   5   4 1163.16    2.73   2
   1   5   6   21.90    0.57   2
   1   5   7   42.88    0.81   2
   4   4  11    6.11    0.70   2
   4   5  10    8.17    0.90   2
   4   6   0    7.85    0.35   2
   4   7   4  333.21    1.98   2
   5   4  11   97.86    1.30   2
   5   7   6  255.54    1.96   2
   6   4  11   -0.21    0.68   2
   6   5  10    9.33    0.95   2
   7   7  -1   42.09    0.73   2
   8   3  11    7.70    0.59   2
   8   6   8    9.94    0.91   2
   8   7   6    0.94    0.89   2
   9   7   5    1.04    0.77   2
  10   4   9    1.51    0.49   2
  10   5   8    6.53    0.65   2
  10   7   4    4.99    0.73   2
  11   5   7   21.72    0.66   2
  11   7   2   43.59    0.95   2
  12   5   6    2.54    0.47   2
  12   6   4   17.59    0.68   2
   0   2  11   -0.29    0.52   2
   0   3  10    0.71    0.52   2
   1   3  11   82.28    1.04   2
   2   6   6    8.34    0.58   2
   3   3  12   62.67    1.14   2
   4   3  12   42.39    0.93   2
   4   7   3  285.01    1.70   2
   5   6   9    3.46    0.95   2
   6   6   9   -0.89    0.84   2
   6   7   7    2.32    0.99   2
   9   5   9    1.13    0.62   2
  11   7   3   55.28    1.02   2
  -1   3   7   35.62    0.57   2
   1   2  12    0.18    0.56   2
   1   5   8  448.96    2.08   2
   2   6   7   24.28    0.75   2
   4   7   6   26.24    0.90   2
   6   3  12    3.71    0.61   2
   7   4  11   37.21    0.83   2
   7   6   9   59.11    1.21   2
   7   7   7   -0.28    0.82   2
   9   4  10    0.29    0.44   2
   9   6   8   20.87    0.85   2
   9   7   6    1.51    0.73   2
  10   6   7   13.32    0.69   2
  10   7   5   24.41    0.83   2
  11   6   6    2.48    0.53   2
  11   7   4   39.18    0.99   2
  12   6   5    0.59    0.49   2
  -1   2  10   50.42    0.70   2
  -1   3   8  148.37    1.00   2
   0   4   9  115.16    1.11   2
   2   5  10   16.73    0.88   2
   3   7   5  117.17    1.33   2
   4   2  13    4.95    0.64   2
   6   8   3   12.02    0.85   2
   8   8   4   46.06    1.19   2
   9   8   2   42.52    1.07   2
   9   8   3   64.65    1.29   2
   1   5   9   32.19    0.77   2
   4   7   1   10.79    0.55   2
   5   2  13    2.00    0.51   2
   5   5  11    0.58    0.66   2
   5   7   8    5.61    0.84   2
   6   7   8   14.26    0.89   2
   7   7   8    5.36    0.90   2
   7   8   5   32.24    1.02   2
   8   6   9    2.72    0.62   2
   8   8   5    0.19    0.89   2
   9   7   7   31.04    0.94   2
  10   7   6    3.27    0.61   2
  10   8   1   42.80    1.00   2
  10   8   2   22.02    0.92   2
  11   7   5    4.83    0.64   2
  -1   3   9   20.26    0.50   2
   0   3  11    2.53    0.50   2
   0   4  10   12.59    0.67   2
   0   5   7   34.07    0.70   2
   1   6   6    2.43    0.59   2
   2   6   2  104.23    0.86   2
   2   6   9    5.63    0.87   2
   3   5  11    9.62    0.73   2
   3   7   7    5.62    0.74   2
   5   8   3  165.10    1.47   2
   5   8   4    5.96    0.75   2
   5   8   5  290.64    2.06   2
   6   5  11   56.52    1.00   2
   6   8   6   17.00    1.03   2
   8   7   8    1.30    0.76   2
   8   8   0   10.63    0.62   2
  10   6   8    1.64    0.53   2
  10   8   3   11.97    0.76   2
   0   5   5    7.31    0.39   2
   0   5   8  124.49    1.14   2
   1   5  10   15.02    0.69   2
   1   6   5    8.75    0.51   2
   1   6   7  100.68    1.09   2
   3   7   2    8.89    0.54   2
   3   7   8    3.23    0.87   2
   4   3  13    3.40    0.63   2
   5   7   9   18.25    1.04   2
   6   4  12   11.92    0.62   2
   6   7   9   41.54    1.11   2
   6   8   1  122.68    1.20   2
   7   6  10    8.19    0.67   2
   8   8   6    5.16    0.79   2
   9   5  10   20.06    0.63   2
   9   6   9   12.06    0.66   2
  10   8   4   29.20    0.95   2
  12   7   4    5.46    0.51   2
  -1   4   6    0.51    0.35   2
  -1   4   7  153.61    1.02   2
  -1   4   8   94.98    0.91   2
   1   6   4  496.15    1.91   2
   1   6   8  133.20    1.28   2
   2   7   5  133.45    1.24   2
   4   7   9   17.81    0.90   2
   5   3  13    1.38    0.51   2
   5   7  -1   54.44    0.69   2
   6   8   7    0.00    0.78   2
   7   7   9   24.25    0.93   2
   7   8   7   14.63    0.99   2
  10   7   7   14.93    0.62   2
  11   7   6    7.12    0.54   2
  11   8   2    0.11    0.57   2
  11   8   3    7.70    0.68   2
   0   5   9   10.37    0.56   2
   1   6   9    2.71    0.75   2
   2   3  13  204.07    1.58   2
   4   5  12    7.28    0.79   2
   4   6  11    7.00    0.84   2
   4   8   3    0.35    0.57   2
   5   5  12    9.93    0.72   2
   5   6  11   15.67    0.88   2
   8   5  11   30.68    0.68   2
   8   6  10    9.61    0.57   2
   8   8   7   18.13    0.91   2
   9   7   8    6.46    0.58   2
   9   8   6   30.83    0.85   2
  10   8   5    3.01    0.61   2
  -1   4   9  511.26    2.00   2
   0   3  12    4.25    0.52   2
   2   7   3  136.74    1.11   2
   2   7   8    2.47    0.69   2
   3   6  11   50.08    1.10   2
   4   8   2  113.13    1.16   2
   5   7  10   67.78    1.26   2
   6   6  11    2.39    0.59   2
   6   8   8   74.13    1.25   2
   7   9   4   96.89    1.40   2
   8   7   9   18.97    0.70   2
   8   9   3    5.54    0.94   2
  11   8   4   -0.51    0.45   2
  -1   3  11    0.97    0.43   2
   0   5  10    6.74    0.64   2
   0   6   7    2.91    0.57   2
   3   4  13    5.16    0.67   2
   3   8   4   28.94    0.81   2
   3   8   6    6.93    0.76   2
   3   8   7   32.22    1.09   2
   4   7  10   -0.22    0.75   2
   6   5  12    0.36    0.47   2
   6   7  10    4.32    0.68   2
   6   9   3   88.30    1.30   2
   6   9   5   74.86    1.34   2
   7   8   8    0.52    0.69   2
   7   9   5    7.13    0.78   2
   8   9   2    0.19    0.66   2
   8   9   4   14.57    0.82   2
   9   9   3    0.90    0.77   2
  10   8   6    8.12    0.54   2
  -2   3   8    8.41    0.40   2
   0   6   6   22.19    0.60   2
   0   6   8  157.80    1.31   2
   1   7   7   25.59    0.78   2
   2   4  13    7.17    0.72   2
   2   6  11   45.07    0.99   2
   3   7  10   30.65    0.96   2
   3   8   3   11.56    0.62   2
   5   8   0  132.59    1.13   2
   5   8   9  122.63    1.53   2
   6   9   6    0.68    0.94   2
   7   7  10   23.05    0.73   2
   7   9   1    4.24    0.76   2
   8   8   8    2.65    0.61   2
   9   7   9    4.51    0.51   2
   9   9   1    4.63    0.73   2
  11   8   5    6.83    0.50   2
  -2   3   9   53.32    0.69   2
  -1   5   6  183.06    1.16   2
  -1   5   7  153.66    1.10   2
  -1   5   8   28.62    0.62   2
   0   4  12   14.08    0.76   2
   1   6   2   13.41    0.40   2
   1   7   8   19.07    0.78   2
   2   7   2  312.12    1.53   2
   4   6  12    2.09    0.69   2
   4   8   9    0.98    0.76   2
   5   9   3    3.47    0.66   2
   5   9   6   40.37    1.09   2
   6   8   9    1.45    0.66   2
   8   9   6   14.12    0.76   2
   9   9   5   10.12    0.70   2
  10   9   3   15.30    0.70   2
  -1   4  11   54.62    0.89   2
  -1   5   9  108.29    1.05   2
   0   6   4 1938.81    3.61   2
   1   4  13  415.20    2.18   2
   1   7   4   11.14    0.53   2
   1   7   9    4.88    0.70   2
   2   8   7   15.03    0.82   2
   4   5  13    6.94    0.61   2
   5   6  12    0.31    0.54   2
   5   7  11    7.56    0.65   2
   5   9   2    5.07    0.73   2
   5   9   7   46.39    1.11   2
   6   9   1   35.67    0.82   2
   6   9   7  116.81    1.46   2
   7   9   7   16.32    0.83   2
   8   7  10    1.09    0.42   2
   8   9   0    7.87    0.58   2
   9   8   8    0.43    0.49   2
  10   8   7    0.79    0.39   2
  10   9   4    5.31    0.55   2
  -2   3  10   43.39    0.62   2
  -1   5   5   50.45    0.63   2
  -1   5  10  126.77    1.24   2
   0   6  10   34.11    0.82   2
   3   5  13    3.50    0.57   2
   3   7  11   -0.26    0.70   2
   4   9   7   10.60    0.89   2
   6   6  12   17.89    0.59   2
   6   7  11   12.03    0.61   2
   7   9   0    9.29    0.59   2
   8   8   9    3.32    0.54   2
   8   9   7    3.39    0.68   2
   9   9   6   30.07    0.76   2
  10   9   5    0.33    0.55   2
  -2   4   8    5.27    0.38   2
  -2   4   9  144.32    1.08   2
   0   7   7  431.48    2.14   2
   1   7   3   14.14    0.50   2
   1   7  10   11.19    0.78   2
   2   5  13   36.32    0.85   2
   2   8   3   29.99    0.78   2
   3   9   5    2.34    0.86   2
   4   8  10   36.62    0.99   2
   5   9   1  109.30    1.21   2
   5   9   8  133.99    1.54   2
   7   7  11   13.17    0.56   2
   7   9   8    7.13    0.74   2
  11   9   3   -0.06    0.37   2
  11   9   3   -0.38    0.22   2
  -1   4  12   14.00    0.73   2
  -1   5  11    4.05    0.66   2
  -1   6   7  335.04    1.69   2
  -1   6   8  140.14    1.19   2
   0   6  11  131.92    1.40   2
   0   7   6   63.41    0.90   2
   0   7   8   16.58    0.72   2
   1   6  12    7.15    0.84   2
   3   8   1   84.79    0.95   2
   3   9   4   93.93    1.23   2
   6   9   0   69.35    0.93   2
   6  10   5   33.18    1.10   2
   7   8  10    5.88    0.57   2
   7  10   3   35.37    1.06   2
   7  10   4    2.37    0.77   2
   7  10   5    3.37    0.82   2
   8  10   4   32.77    0.99   2
   9   9   7    4.77    0.52   2
  10   9   6    0.60    0.45   2
  -1   6   6   52.36    0.74   2
  -1   6   9   13.40    0.61   2
   0   7   5  351.49    1.76   2
   1   8   8   85.73    1.22   2
   3   6  13   43.70    0.90   2
   3   7  12    3.26    0.72   2
   3   9   8    7.90    0.85   2
   4   6  13    1.22    0.52   2
   4   7  12    0.05    0.55   2
   4   9   9  130.94    1.54   2
   5   7  12   10.90    0.60   2
   5   9   9    4.28    0.73   2
   6   9   9   94.27    1.19   2
   7  10   2    0.40    0.73   2
   7  10   6    8.86    0.80   2
   8   9   8   24.39    0.66   2
   8  10   2  111.91    1.29   2
   8  10   5    9.21    0.78   2
  -1   6   5  163.65    1.16   2
   0   7  10   22.58    0.81   2
   1   8   4   28.49    0.72   2
   2   6  13    0.07    0.63   2
   2   7  12    3.24    0.73   2
   2   9   5  112.75    1.41   2
   2   9   6    9.11    0.81   2
   3   9   9   17.38    1.03   2
   4   8  11   16.85    0.75   2
   4   9   1  381.27    1.94   2
   5   8  11   23.72    0.74   2
   5  10   6    1.55    0.77   2
   6  10   7   27.85    0.99   2
   7   9   9    0.63    0.59   2
   8  10   1    9.33    0.73   2
   8  10   6   15.91    0.73   2
   9  10   4    0.59    0.55   2
  -2   5   8    0.74    0.37   2
  -1   5  12  118.19    1.28   2
   0   5  13   67.66    1.08   2
   0   6  12  155.51    1.49   2
   0   7   4   89.78    0.93   2
   3   9   2   13.45    0.68   2
   4  10   4  137.68    1.59   2
   4  10   6   13.42    0.90   2
   5  10   7  119.06    1.45   2
   6   7  12    3.55    0.40   2
   6   8  11    0.26    0.44   2
  -2   5   6   18.29    0.52   2
   0   8   7    0.62    0.62   2
   0   8   8    5.31    0.85   2
   1   6  13    3.02    0.68   2
   1   7  12    3.84    0.83   2
   1   8   3  130.13    1.18   2
   2   8  11   14.73    0.82   2
   3   7  -1   18.97    0.41   2
   3   8   0   14.58    0.53   2
   3   9  10   13.68    0.93   2
   4   9  10    4.24    0.70   2
   4  10   3    1.48    0.77   2
   4  10   7    4.70    0.81   2
   5   9  10   12.54    0.69   2
   5  10   2    0.39    0.65   2
   5  10   8   22.46    0.96   2
   6   9  10    7.75    0.64   2
   6  10   8   72.86    1.14   2
   8  10   7   20.42    0.67   2
   9  10   6    2.13    0.49   2
  -3   3   8    6.50    0.37   2
  -3   3   9    0.06    0.33   2
  -1   6   4   38.65    0.61   2
  -1   7   6    9.11    0.65   2
  -1   7   7   59.38    0.90   2
   0   7   3  765.40    2.37   2
   0   8   6    9.64    0.66   2
   2   9   3  135.83    1.32   2
   4  10   8  127.33    1.47   2
   7  10   8   14.33    0.67   2
  -2   5  11   51.14    0.82   2
  -2   6   8  259.51    1.55   2
   0   8   5   39.69    0.81   2
   1   8  11   72.70    1.15   2
   1   9   5    4.06    0.68   2
   1   9   8    4.75    0.81   2
   2   7  13    1.96    0.63   2
   2   9  10   46.79    1.08   2
   3   7  13    1.35    0.49   2
   3   8  12    0.48    0.56   2
   3  10   8   -0.46    0.78   2
   4   7  13   28.95    0.65   2
   4   8  12    6.00    0.52   2
   4  10   2   12.94    0.84   2
   5  10   1   15.16    0.78   2
   5  10   9   71.20    1.12   2
   7   9  10    3.51    0.43   2
  -3   4   9  243.03    1.31   2
  -2   5   5  314.98    1.37   2
  -2   6   7    1.72    0.42   2
  -2   6  10    9.36    0.73   2
  -1   7   5   12.32    0.53   2
   0   6  13   11.59    0.69   2
   2   8  12    6.60    0.61   2
   3   9  11   10.92    0.78   2
   3  10   3    2.74    0.79   2
   4   9  11    5.23    0.57   2
   5   9  11    2.61    0.48   2
   6  10   9    1.38    0.53   2
   6  11   4    4.87    0.76   2
   6  11   5    3.31    0.70   2
   6  11   6   53.21    1.07   2
   7  11   5    2.64    0.63   2
   8  11   3   42.25    0.94   2
   8  11   4    7.34    0.67   2
  -3   4   8  262.34    1.28   2
  -2   5  12    3.54    0.63   2
  -2   6   6  320.02    1.55   2
  -1   7  11  316.22    1.96   2
   1   7  13   19.37    0.79   2
   1   8   2  133.59    1.09   2
   1   8  12   -0.53    0.70   2
   1   9   4    3.03    0.62   2
   2   9   2    1.35    0.50   2
   2   9  11    6.48    0.82   2
   2  10   5   35.53    1.00   2
   2  10   8   98.77    1.39   2
   3  10   9   28.15    0.95   2
   5  11   4  106.76    1.34   2
   5  11   5   20.59    0.90   2
   5  11   6   68.13    1.15   2
   6  11   3   15.40    0.82   2
   7  10   9    3.57    0.48   2
   7  11   2   32.06    0.94   2
   7  11   6   27.76    0.76   2
   8  11   2    2.03    0.66   2
   8  11   5    3.59    0.58   2
  -3   4   7  647.20    1.89   2
  -1   6   3   97.56    0.82   2
   0   7   2  146.34    1.05   2
   0   9   6   64.92    1.16   2
   1   6  14    1.25    0.53   2
   2  10   9    0.95    0.86   2
   4  10   1    1.26    0.63   2
   4  11   4    0.60    0.85   2
   4  11   7  152.03    1.64   2
   5  10   0   61.66    0.95   2
   5  10  10    1.99    0.60   2
   5  11   7    5.22    0.72   2
   6  11   7   63.19    1.01   2
   8  11   6    0.05    0.49   2
   9  11   4    2.06    0.47   2
  -3   5   8  211.71    1.29   2
  -3   5   9   66.45    0.80   2
  -3   5  10   81.45    0.93   2
  -2   7   7  129.46    1.21   2
  -1   8   6   71.47    1.01   2
   0   7  13   34.33    0.92   2
   0   8   3    3.32    0.53   2
   1   9   3    2.31    0.54   2
   1   9  11    8.87    0.86   2
   3  10   2    0.42    0.59   2
   3  10  10    0.07    0.65   2
   5  11   8   45.98    0.98   2
   6  11   8    0.19    0.55   2
   7  11   1   -0.05    0.65   2
  -3   5   7    7.33    0.45   2
  -1   8   5  277.77    1.70   2
   0   8  12   14.06    0.77   2
   0   9  10   59.86    1.12   2
   1  10   5   26.54    1.06   2
   1  10   6    0.80    0.76   2
   1  10   9   53.08    1.23   2
   2   7  14    0.40    0.43   2
   2   8  13    1.14    0.49   2
   2  10   3   17.41    0.75   2
   3   9   0   65.18    0.82   2
   3  11   6    7.22    0.84   2
   3  11   7    2.59    0.79   2
   4   9  12   17.04    0.55   2
   4  11   8    7.87    0.74   2
  -3   5  11  127.95    1.12   2
  -2   7   6   41.12    0.74   2
  -1   8  11  370.02    2.17   2
   1   8   1   21.42    0.52   2
   1   8  13   13.84    0.72   2
   3  10  11   11.56    0.70   2
   3  11   8  120.64    1.45   2
   4  10  11    3.27    0.54   2
   4  11   9    8.58    0.74   2
   5  11   9    1.41    0.57   2
   7  11   8   14.32    0.50   2
  -3   5   6  190.49    1.11   2
  -3   6   8   25.68    0.61   2
  -3   6  10   48.16    0.91   2
  -2   6   4  438.05    1.69   2
   0   9  11   29.59    0.92   2
   1   9  12    1.74    0.60   2
   1  10  10    3.99    0.74   2
   2  10  11    2.94    0.70   2
   2  11   6    2.68    0.81   2
   2  11   8    9.03    0.97   2
   3  10   1   46.91    0.85   2
   4  10   0    8.95    0.55   2
   4  11   2    3.71    0.67   2
   5  10  11    9.18    0.46   2
   6  11   9   35.14    0.67   2
  -2   8   7   29.06    0.86   2
  -1   8  12   11.20    0.77   2
   0   8   2   44.13    0.69   2
   0   8  13    6.74    0.70   2
   0  10   7   72.54    1.23   2
   0  10   9    8.48    0.98   2
   2  10   2   31.36    0.78   2
   5  12   4   29.70    1.00   2
   5  12   5    2.42    0.66   2
   5  12   6   12.37    0.77   2
   6  12   4    4.02    0.65   2
   6  12   5    3.48    0.65   2
   6  12   6   18.64    0.75   2
   7  12   3    2.99    0.65   2
   7  12   4   10.82    0.62   2
   7  12   5    2.89    0.56   2
  -2   8   6  197.40    1.51   2
   0   9   3   49.20    0.84   2
   0   9  12    6.56    0.74   2
   0  10   5   26.16    0.98   2
   0  10  10  114.97    1.48   2
   1  10   3    5.35    0.64   2
   1  10  11    1.88    0.66   2
   2  11   4    0.91    0.74   2
   3  11  10   34.73    0.87   2
   4  11  10    4.33    0.52   2
   4  12   5   16.32    0.84   2
   4  12   7    7.46    0.79   2
   5  12   3    7.98    0.81   2
   5  12   7   20.28    0.71   2
   7  12   6    0.06    0.42   2
  -4   4   9    5.05    0.43   2
  -3   5   5  255.60    1.23   2
  -3   6   6    7.39    0.44   2
  -3   7   9   43.29    0.82   2
  -3   7  10   16.29    0.82   2
  -1   9  11    4.95    0.69   2
   1   9  13    0.39    0.56   2
   1  11   8   80.46    1.29   2
   2  11  10    0.55    0.70   2
   3  10  12    4.42    0.45   2
   3  11   2  140.21    1.40   2
   3  12   6    5.37    0.92   2
   4  11   1    7.86    0.64   2
   4  12   4   37.11    0.93   2
   5  11   0  175.48    1.42   2
   5  12   8    1.26    0.54   2
   6  12   2   58.16    1.03   2
   7  12   2   26.61    0.74   2
  -4   4   8    7.21    0.41   2
  -3   7   7  101.97    1.05   2
  -3   7  11    6.99    0.82   2
  -2   7  13    2.41    0.72   2
  -2   8   5   37.40    0.83   2
  -1   7   2  448.54    1.72   2
  -1   7  14   63.83    0.97   2
  -1   8   3  414.11    1.86   2
  -1   8  13    7.80    0.70   2
   1   8  14   10.63    0.51   2
   1  11   9    2.39    0.73   2
   2   8  -1    0.46    0.29   2
   2  11   3    3.64    0.70   2
   3  10   0    0.54    0.48   2
   3  12   5   40.83    1.02   2
   3  12   8   18.81    0.88   2
   4  12   8   22.56    0.75   2
   5  12   2   98.28    1.29   2
  -3   6   5 1705.15    3.38   2
  -2   9   8    1.07    0.71   2
  -2   9   9  128.00    1.41   2
  -1   9   4   19.51    0.71   2
  -1   9  12  186.17    1.57   2
  -1  10   7    8.71    0.83   2
  -1  10   9   27.84    0.94   2
   0   9  13    5.51    0.65   2
   1  10   2   23.49    0.71   2
   1  10  12   -0.29    0.51   2
   1  11  10   25.74    0.86   2
   2  12   6    4.70    0.95   2
   3  11  11    2.06    0.44   2
   3  12   4   -0.01    0.70   2
  -4   4   7    1.19    0.28   2
  -4   5   8  175.31    1.13   2
  -4   5  11  168.62    1.24   2
  -3   7   6  320.05    1.66   2
  -1  10  10    1.35    0.72   2
   0   9   2   13.57    0.57   2
   0  11   7    3.64    0.83   2
   0  11   8    0.44    0.78   2
   0  11   9   28.53    1.07   2
   2  11   2   68.07    1.13   2
   2  11  11    6.13    0.55   2
   3  12   9   15.99    0.68   2
   4  11   0   30.24    0.84   2
   4  12   2   35.96    0.99   2
  -4   5   7  484.79    1.79   2
  -4   6   8  379.55    1.77   2
  -4   6   9    2.62    0.49   2
  -2   8   4    5.56    0.52   2
  -2   8  13   28.70    0.84   2
  -1  10  11   58.75    1.14   2
   0  11   5    6.58    0.97   2
   0  11  10   -0.50    0.83   2
   1  11  11    3.78    0.60   2
   2  12   4    5.53    0.91   2
   2  12   9    2.17    0.63   2
   5  12   1    5.68    0.70   2
  -2   9   5    3.26    0.72   2
  -2   9  12    0.43    0.75   2
  -1   8   2    6.63    0.45   2
  -1   9   3  147.29    1.27   2
  -1   9  13   -0.25    0.61   2
   1  12   6    8.00    0.85   2
   1  12   7    8.66    0.88   2
   3  12  10   -0.12    0.45   2
   4  13   6    4.37    0.67   2
   5  13   4    2.42    0.69   2
   5  13   5    3.22    0.57   2
   6  13   4   18.84    0.69   2
   6  13   5   14.41    0.55   2
   6  13   6    1.13    0.43   2
  -4   6   7  109.68    0.97   2
  -4   6  12  114.44    1.16   2
  -4   7  10   64.44    1.04   2
  -3   6   4   28.80    0.55   2
  -3   7  13   93.50    1.09   2
  -3   8   6    2.89    0.57   2
  -3   8  12    1.25    0.76   2
  -2  10   7   10.72    0.94   2
  -1   7   1   40.66    0.61   2
  -1  10   4    6.33    0.79   2
  -1  10  12   40.72    0.95   2
  -1  11   8   38.74    1.05   2
   0  11   4   16.86    0.85   2
   0  11  11   13.51    0.70   2
   1  10   1   30.22    0.73   2
   1  12   5    6.57    0.84   2
   1  12   9   36.57    0.93   2
   3  10  -1   73.43    0.90   2
   4  13   4   13.50    0.87   2
   4  13   5   25.24    0.81   2
   4  13   7   44.35    0.82   2
   5  13   3    1.70    0.66   2
   5  13   7    8.18    0.49   2
   6  13   3    4.81    0.58   2
  -4   5   6    0.37    0.31   2
  -4   7   8    6.93    0.54   2
  -4   7  11   35.70    0.89   2
  -3   9   8    9.60    0.76   2
  -3   9   9   47.51    1.01   2
  -2   6   2   93.78    0.77   2
  -2  10   6  163.52    1.63   2
  -1  11  10  142.04    1.55   2
   0  10   2  178.42    1.42   2
   0  10  13    0.84    0.51   2
   1  11   2   31.65    0.93   2
   1  11  12   53.91    0.81   2
   1  12  10    6.97    0.71   2
   2  11   1   74.85    1.05   2
   3  11   0  178.81    1.40   2
   3  13   5    0.94    0.67   2
   3  13   6   63.45    1.05   2
   3  13   7    9.40    0.68   2
   4  13   8    5.31    0.52   2
  -4   7   7  113.44    1.08   2
  -3   7   4   72.48    0.88   2
  -3   9   7    9.60    0.74   2
  -2   8   3    0.80    0.46   2
  -2   9   4   66.82    0.98   2
  -2   9  13   13.90    0.74   2
  -2  10  11    4.73    0.71   2
   0  12   9   -0.19    0.78   2
   2  13   6    0.91    0.80   2
   2  13   7   69.54    1.16   2
   3  13   8    8.12    0.57   2
   4  13   3   62.73    1.00   2
   5  13   2   17.95    0.75   2
  -4   8   9   23.36    0.77   2
  -4   8  10    7.88    0.65   2
  -2  10   5    0.85    0.69   2
  -2  10  12   89.44    1.20   2
  -1  10   3   52.47    0.94   2
  -1  10  13   74.80    1.02   2
  -1  11   5   14.55    0.87   2
  -1  11  11    9.93    0.69   2
   0  11  12    5.35    0.51   2
   0  12   5    1.81    0.92   2
   0  12  10   28.35    0.89   2
   2  13   5    1.89    0.73   2
   2  13   8    9.22    0.64   2
   3  13   9    0.19    0.48   2
  -4   7   6   37.20    0.71   2
  -2  11   9   54.48    1.10   2
  -1   8   1  668.18    2.18   2
   2  13   9    4.84    0.54   2
   3  13   3    1.66    0.64   2
 -16   2  10   10.01    0.61   3
 -16   2  11   25.93    0.72   3
 -16   2  12   12.21    0.54   3
 -15   1  13   43.31    0.82   3
 -15   4   5   31.30    0.72   3
 -14   1   5   19.88    0.77   3
 -13  -1  13  231.68    1.55   3
 -11  -1   3    2.26    0.65   3
 -11   1   1    0.86    0.55   3
 -10  -3   6   16.83    0.67   3
 -10  -3  10   28.09    0.82   3
  -9  -1   1    3.48    0.40   3
  -7  -3   3  496.59    1.58   3
  -7  -2   1  346.36    1.28   3
 -15   1   8   23.44    0.79   3
 -12  -2   7  169.43    1.45   3
 -12  -2  11  244.44    1.63   3
 -11  -2   5   22.95    0.75   3
 -11  -1  14  142.73    1.18   3
 -10  -3   8    1.52    0.71   3
 -10  -1   2  169.17    1.15   3
  -9  -3   5   25.52    0.62   3
  -7  -3  10    9.50    0.47   3
  -7  -1   0  128.11    0.79   3
  -7   0  -1  122.08    0.74   3
  -6  -3   3 1085.50    2.14   3
 -16   3  10    1.45    0.55   3
 -16   4   8    3.75    0.48   3
 -15   1   9    1.49    0.69   3
 -15   1  10    9.13    0.82   3
 -15   1  11   52.34    1.00   3
 -15   2   7   35.51    0.83   3
 -15   3   6  153.81    1.26   3
 -14   0   8   13.52    0.91   3
 -14   0  12   10.14    0.81   3
 -14   1  14   12.31    0.67   3
 -14   3   4   82.18    0.98   3
 -13  -1  12  304.38    1.80   3
 -13   1  15   44.94    0.78   3
 -13   2   3   11.21    0.66   3
 -12  -2   8   98.58    1.21   3
 -12  -1  13   41.65    0.93   3
 -10  -2   4  432.13    1.82   3
  -9  -2   3  260.01    1.36   3
  -8  -2   2   28.77    0.52   3
 -16   3  11    6.48    0.51   3
 -16   4   9   -0.36    0.49   3
 -16   5   8    0.23    0.40   3
 -14   1   6    0.60    0.64   3
 -14   2  15    8.93    0.51   3
 -13  -1  11   14.03    0.79   3
 -11  -2   6    0.78    0.63   3
 -11  -2  11  104.72    1.19   3
 -10  -2  12  274.98    1.53   3
  -9  -3   7   22.16    0.70   3
  -9  -3   8  630.99    2.18   3
  -9  -3   9   36.34    0.69   3
  -8  -3   5   10.18    0.47   3
  -7  -3   4   11.90    0.42   3
  -6  -3   4  581.62    1.60   3
  -6  -3   9   87.76    0.69   3
  -5  -3   8  112.45    0.70   3
 -15   2   8    2.85    0.62   3
 -14   4   4   23.58    0.71   3
 -12  -1   6   12.16    0.84   3
 -12   0   4   22.38    0.72   3
 -12   1   3  167.21    1.35   3
 -11  -2   7   11.47    0.71   3
 -11  -2  10    4.07    0.76   3
 -11  -1   4   50.47    0.84   3
 -11   2   1    8.65    0.55   3
 -10  -2   5  336.72    1.66   3
  -8  -3   6   39.51    0.67   3
  -8  -3   9   26.68    0.58   3
  -8  -1   1  144.84    0.89   3
  -8   0   0   14.09    0.43   3
  -7  -3   5    8.12    0.46   3
  -7  -2   2   85.78    0.72   3
 -16   6   9    0.18    0.39   3
 -15   2   9   15.99    0.72   3
 -15   3   7   24.23    0.73   3
 -14   1   7   48.42    0.97   3
 -12   1  15   78.80    0.93   3
 -11  -2   8    4.41    0.67   3
 -11  -2   9   33.21    0.83   3
 -11   0   3  616.10    2.21   3
 -11   1   2   35.10    0.74   3
  -9  -2   4  187.58    1.18   3
  -9  -1   2   80.75    0.76   3
  -9   1   0   24.43    0.51   3
  -8  -3   7  212.51    1.20   3
  -8  -3   8    0.85    0.41   3
  -8  -2   3  128.93    0.92   3
  -6  -3   5  966.63    2.05   3
  -6  -3   8   72.02    0.63   3
 -15   2  10    0.76    0.65   3
 -15   2  11    2.29    0.62   3
 -15   3   8  131.21    1.28   3
 -15   3  13    0.92    0.53   3
 -15   6   6   -0.25    0.45   3
 -14   1   8    7.43    0.90   3
 -14   2   6   78.64    1.04   3
 -14   2  14   58.07    0.88   3
 -14   3   5   23.82    0.74   3
 -13   1  14   50.09    0.90   3
 -13   2  15    5.55    0.55   3
 -12   3   2   18.98    0.65   3
 -11  -1   5  304.83    1.69   3
 -10   0   2   37.66    0.65   3
 -10   1   1   27.94    0.56   3
  -9   0   1    2.74    0.36   3
  -7  -3   7   14.51    0.43   3
  -6  -3   6    0.82    0.28   3
  -6  -3   7 1701.29    2.76   3
 -15   4   7   89.73    1.02   3
 -15   4  14    1.27    0.38   3
 -14   1  11    3.19    0.83   3
 -13   0  11   47.50    1.08   3
 -12  -1   8    5.62    0.74   3
 -12  -1   9   17.64    0.81   3
  -9  -2  11   82.05    0.88   3
  -7  -1   1   12.22    0.39   3
 -15   3   9   21.03    0.76   3
 -15   3  10   55.88    1.01   3
 -15   5   7    1.66    0.62   3
 -15   5  14    2.10    0.37   3
 -14   2   7    7.88    0.71   3
 -14   2  13   -0.02    0.66   3
 -14   4   5   22.91    0.77   3
 -12   1   4   19.54    0.68   3
 -12   2   3    0.50    0.64   3
 -11  -1   6   21.26    0.83   3
 -10  -2   9   -0.17    0.55   3
 -10  -1   4   92.07    0.92   3
 -14   3   6    1.26    0.63   3
 -14   4  15    0.54    0.36   3
 -13   1  13  227.42    1.52   3
 -12   1  14   36.49    0.83   3
 -12   2  15    1.48    0.53   3
  -9  -2   6   65.79    0.78   3
  -9  -1   3    9.47    0.45   3
  -8  -1   2  227.25    1.09   3
 -15   4  12   24.75    0.64   3
 -15   5   8   39.04    0.83   3
 -15   5  13    2.98    0.46   3
 -14   2   9   10.22    0.89   3
 -14   2  12  124.11    1.21   3
 -14   5   5    4.29    0.56   3
 -14   5  15    2.43    0.38   3
 -13   2  14  148.80    1.21   3
 -13   3  15    1.67    0.50   3
 -12   0  12  983.89    2.99   3
 -11  -1   7  124.69    1.17   3
 -11  -1   8    5.24    0.76   3
 -11   1   3    2.16    0.52   3
 -11   2   2   26.51    0.61   3
 -10  -1   5   87.82    0.98   3
  -9  -2   7   73.51    0.83   3
  -9   2   0   54.64    0.62   3
  -8  -2   5  122.58    0.91   3
  -7  -2  10    0.38    0.40   3
 -15   6   8   -0.50    0.52   3
 -14   3   7   41.42    0.91   3
 -14   4   6   98.72    1.17   3
 -14   6   5    3.41    0.56   3
 -13   1  11   14.32    0.88   3
 -12   1   5    4.25    0.63   3
 -11   0   5  257.49    1.53   3
 -10   1   2  181.65    1.16   3
 -10   2   1   22.95    0.53   3
  -8   1   0  107.42    0.72   3
 -15   5  11    2.88    0.58   3
 -15   5  12    1.78    0.45   3
 -15   7   8   10.68    0.47   3
 -14   3   8   51.02    1.07   3
 -14   4  14    4.43    0.45   3
 -13   1   9    1.11    0.74   3
 -13   1  10  172.56    1.48   3
 -13   2  13   16.62    0.77   3
 -12   2   4  148.82    1.22   3
 -11   1  14  143.01    1.16   3
 -10  -1   6  132.02    1.08   3
  -9  -1   4   53.53    0.68   3
  -9   1   1    3.77    0.34   3
  -8  -2   8  205.87    1.18   3
 -15   6   9   45.86    0.73   3
 -15   6  10   12.27    0.58   3
 -15   6  12   25.64    0.55   3
 -14   3  12   45.10    0.86   3
 -14   5   6    2.96    0.60   3
 -13   3  14   29.95    0.80   3
 -13   4  15    6.08    0.45   3
 -13   5   4    9.65    0.65   3
 -12   1   6   11.79    0.84   3
 -12   2  14  148.90    1.27   3
 -12   3  15    2.47    0.57   3
 -11   1   4   49.84    0.83   3
 -11   3   2   13.77    0.61   3
 -10   0   4  213.95    1.28   3
  -9  -1  11    1.37    0.57   3
  -8  -1   3  556.11    1.65   3
  -7  -2   5 1417.48    2.52   3
 -14   4  13    2.25    0.51   3
 -14   6   6    5.29    0.64   3
 -13   2  12    4.11    0.80   3
 -12   1  12   25.55    0.86   3
 -11   2   3   69.55    0.92   3
 -10  -1   9    4.53    0.58   3
  -9  -1   5    3.35    0.43   3
  -9   0  13    5.12    0.48   3
  -7  -2   7  292.91    1.25   3
  -7  -2   8   90.32    0.74   3
 -14   4   8  190.99    1.46   3
 -14   4  12    6.57    0.72   3
 -14   5   7   43.90    0.90   3
 -14   6  14    3.35    0.41   3
 -14   7   6    0.06    0.54   3
 -14   8   6    2.55    0.41   3
 -13   2   8    9.03    0.76   3
 -13   2  11   80.50    1.16   3
 -13   3   6   72.20    1.01   3
 -13   4   5    8.09    0.77   3
 -13   6   4    4.82    0.61   3
 -12   1   7    7.19    0.71   3
 -12   3   4    7.14    0.71   3
 -11   0   7  128.89    1.16   3
 -10   0  12  374.43    1.78   3
 -10   1   3   57.18    0.76   3
 -10   3   1  117.70    0.92   3
  -9   0   3   77.19    0.73   3
  -8  -1  11   85.10    0.80   3
  -6  -2   5  120.49    0.72   3
  -6  -2   6   18.88    0.40   3
  -6  -2   7   41.57    0.53   3
 -14   4   9    1.37    0.67   3
 -14   4  11    5.76    0.75   3
 -14   5  13   15.14    0.56   3
 -13   2  10  136.81    1.33   3
 -13   3  13   -0.09    0.58   3
 -13   4  14    1.12    0.55   3
 -13   6  15   24.45    0.53   3
 -12   1   9   16.64    0.90   3
 -11   1   5  307.86    1.64   3
 -11   2  14    1.67    0.65   3
 -11   3  15    0.80    0.55   3
 -10   2   2    8.52    0.51   3
  -9  -1   6  122.94    0.95   3
  -8  -1   4    4.75    0.37   3
  -7   1   0  127.21    0.72   3
 -14   5   8    1.30    0.62   3
 -14   6   7   11.82    0.64   3
 -14   6  13    0.95    0.47   3
 -14   7   7    5.01    0.62   3
 -14   8   7    1.46    0.47   3
 -12   2   6  126.71    1.29   3
 -12   3  14   35.54    0.77   3
 -11   4   2   18.62    0.61   3
  -9   1   2   86.18    0.74   3
  -8   1   1  145.81    0.85   3
  -8   2   0  403.94    1.32   3
 -14   5   9  130.22    1.23   3
 -14   5  10    1.05    0.70   3
 -14   5  11   66.46    0.98   3
 -14   6   8    5.62    0.66   3
 -14   7  13    2.68    0.43   3
 -13   3   8   84.34    1.21   3
 -13   4  13   50.16    0.90   3
 -13   5  14   12.26    0.60   3
 -11   1   6   22.21    0.81   3
 -11   3   3   26.98    0.74   3
 -10   0   6  149.66    1.11   3
  -8  -1   5  156.80    0.94   3
 -14   6   9    3.77    0.66   3
 -13   3  10  114.62    1.25   3
 -13   6   5    3.59    0.57   3
 -12   2   7  158.80    1.33   3
 -12   5  15   20.60    0.55   3
 -11   1  11  446.61    2.05   3
 -11   2  13  169.56    1.35   3
 -11   4  15   18.35    0.62   3
 -10   1   4   81.54    0.83   3
 -10   4   1   42.09    0.61   3
  -8  -1   6    4.65    0.44   3
  -8   0  12   35.29    0.61   3
  -7  -1   4  469.49    1.40   3
  -6  -1  10   12.49    0.38   3
 -14   6  11    2.43    0.53   3
 -14   7   9    8.63    0.63   3
 -14   7  11   31.03    0.70   3
 -14   7  12   12.83    0.51   3
 -14   8  12   22.02    0.52   3
 -14   9  10    0.60    0.37   3
 -14   9  11    4.62    0.39   3
 -13   4   7   14.02    0.74   3
 -13   6  14    1.17    0.40   3
 -13   7   5    2.68    0.51   3
 -13   8   5   16.70    0.61   3
 -12   2   8   96.61    1.14   3
 -12   2  11  248.23    1.62   3
 -12   4  14    6.62    0.57   3
 -11   1   7  119.55    1.11   3
 -10   0   8    4.95    0.57   3
 -10   1  12  305.05    1.63   3
 -10   2   3   78.71    0.87   3
  -9   1  13    3.86    0.50   3
  -8  -1   7   17.41    0.48   3
  -8  -1   8  183.46    1.06   3
 -14   7  10   10.98    0.56   3
 -14   8  10   13.84    0.51   3
 -14   8  11    0.09    0.38   3
 -13   4  11   21.66    0.88   3
 -13   5  13    4.66    0.55   3
 -13   7  14    5.18    0.38   3
 -13   8  14    2.47    0.35   3
 -12   6  15    4.09    0.40   3
 -11   1   8    4.42    0.64   3
 -11   2   5   22.89    0.67   3
 -10   1   5   86.98    0.92   3
  -9   0   5  195.67    1.11   3
  -9   1   3    9.68    0.41   3
  -7  -1   5   63.43    0.59   3
 -13   4  10   22.77    0.80   3
 -13   5  12    8.87    0.70   3
 -13   6   6    5.74    0.66   3
 -13   6  13   24.30    0.69   3
 -13   9   6   11.91    0.56   3
 -12   3  12    7.77    0.68   3
 -12   4   5    0.03    0.56   3
 -12   7  15   44.80    0.61   3
 -11   3   4  101.32    0.97   3
 -11   5  15    3.74    0.55   3
 -10   4  15    0.60    0.53   3
  -9   2   2   73.76    0.73   3
  -9   3   1  237.77    1.15   3
  -8   1   2  246.32    1.09   3
  -7  -1   6  426.08    1.41   3
 -13   5   8   39.01    0.96   3
 -13   5  11    0.75    0.73   3
 -13   7   6    7.75    0.62   3
 -13   8   6    6.35    0.59   3
 -11   2   6    1.10    0.57   3
 -11   4  14    0.12    0.63   3
 -10   1   6  134.25    1.11   3
  -9   0   7   92.96    0.86   3
  -9   0   9   58.10    0.75   3
  -9   1  12    6.77    0.64   3
  -8   0   4    7.05    0.36   3
  -8   2   1  504.01    1.48   3
  -8   3   0   67.69    0.59   3
  -7   1   1   12.85    0.32   3
 -13   5   9   41.74    0.91   3
 -13   5  10    9.85    0.73   3
 -13   6   7   28.72    0.81   3
 -13   6  12    1.19    0.54   3
 -13   8  13    6.95    0.44   3
 -12   3   8   17.13    0.79   3
 -12   8   4   77.09    0.91   3
 -11   2   7   11.34    0.74   3
 -11   5   3   -0.34    0.58   3
 -10   2   4  425.21    1.67   3
 -10   4   2   62.40    0.79   3
  -9   1   4   52.81    0.64   3
  -7   0  11    5.78    0.37   3
  -7   2   0   90.26    0.60   3
 -13   6   8   71.75    1.02   3
 -13   6  11  138.26    1.26   3
 -13   7   7    7.77    0.62   3
 -13   7  12   19.51    0.67   3
 -13   8   7   20.82    0.73   3
 -13   9   7   -0.20    0.44   3
 -13   9  12   14.78    0.52   3
 -12   5  13   14.60    0.73   3
 -12   7  14    4.41    0.48   3
 -11   2   8    4.85    0.65   3
 -11   2   9   32.36    0.81   3
 -11   2  10    4.51    0.67   3
 -11   3   5    0.99    0.54   3
 -10   1   8   46.95    0.79   3
 -10   1   9    4.08    0.58   3
 -10   2  12  263.31    1.56   3
 -10   3   3   15.63    0.53   3
  -6  -1   7   45.96    0.51   3
 -13   6   9  135.92    1.26   3
 -13   6  10   21.07    0.77   3
 -13   7   8   27.87    0.75   3
 -13   7  11    2.35    0.66   3
 -13   8   8   24.66    0.72   3
 -13   8  12    3.18    0.45   3
 -13   9   8    2.47    0.57   3
 -13  10   9    7.38    0.46   3
 -13  10  10    1.81    0.39   3
 -13  10  11   12.63    0.41   3
 -12   6   5   57.44    0.96   3
 -12   8  14   28.23    0.54   3
 -12   9  14    6.28    0.35   3
 -11   3  12   66.09    0.97   3
 -11   5  14    4.02    0.67   3
 -10   2   5  337.99    1.57   3
  -9   2   3  265.58    1.24   3
  -9   4   1  337.71    1.36   3
  -8   0   6  379.66    1.43   3
  -8   1   3  540.20    1.59   3
 -13   7   9   -0.02    0.60   3
 -13   7  10   49.70    0.83   3
 -13   8   9    5.57    0.63   3
 -13   8  10    3.67    0.60   3
 -13   8  11    2.59    0.48   3
 -13   9   9    4.97    0.54   3
 -13   9  10    3.14    0.50   3
 -12   4  10    5.32    0.71   3
 -12   6  13   17.13    0.64   3
 -12   7   5   48.23    0.93   3
 -12  10   5    0.51    0.41   3
 -11   3   6  156.42    1.23   3
 -11   4  13   56.31    0.87   3
 -11   6   3   42.01    0.73   3
 -10   2  11   80.62    1.04   3
 -10   3  13  147.99    1.20   3
 -10   5   2   14.17    0.57   3
 -10   6  15    2.56    0.50   3
  -9   1   5    4.45    0.42   3
  -8   0   8   21.57    0.50   3
  -8   2  13    4.17    0.54   3
  -7   1  12   83.54    0.79   3
 -12   7  13   12.32    0.62   3
 -12   8   5   10.41    0.67   3
 -12   9   5   32.84    0.70   3
 -12  11   6    1.74    0.36   3
 -11   3   7    0.58    0.60   3
 -11   3  10   41.97    0.95   3
 -11   4   5  135.02    1.14   3
 -11   5   4   60.65    0.91   3
 -11   6  14    4.86    0.62   3
  -9   1   6  128.91    0.95   3
  -9   2  12  454.87    1.89   3
  -7   1   2  695.03    1.61   3
  -6   0  10  249.97    1.08   3
 -12   5  10   13.22    0.88   3
 -12   5  11   33.98    0.83   3
 -12   6  12    2.31    0.61   3
 -12   9  13   62.69    0.72   3
 -11   3   9   27.50    0.80   3
 -11   5  13   63.32    1.00   3
 -11   8   3   66.92    0.82   3
 -10   2   7  229.14    1.40   3
 -10   4   3   43.49    0.69   3
 -10   7  15    1.87    0.44   3
  -9   1   7   15.83    0.53   3
  -9   1   8   19.37    0.66   3
  -8   2   2   31.30    0.47   3
  -8   3   1  217.86    1.02   3
 -12   5   9    4.16    0.70   3
 -12   6   7   12.28    0.71   3
 -12   6  11    2.15    0.72   3
 -12   7  12   10.28    0.72   3
 -12   8   6   10.28    0.74   3
 -12   9   6    2.17    0.61   3
 -12  10  12    4.10    0.44   3
 -12  11  11    2.08    0.37   3
 -11   4   6    4.72    0.63   3
 -11   6   4   49.15    0.89   3
 -11   7  14   62.60    0.80   3
 -10   2   8  225.89    1.37   3
 -10   2   9    0.63    0.56   3
 -10   6   2   73.60    0.84   3
 -10   8  15    1.06    0.35   3
 -10   9  15   23.00    0.46   3
  -9   2   4  196.59    1.08   3
  -9   5   1   34.52    0.58   3
  -9   6  15    5.29    0.51   3
  -8   1   4    3.78    0.34   3
  -7   2   1  342.16    1.14   3
  -7   3   0   35.41    0.42   3
 -12   6   9    2.00    0.76   3
 -12   7   7   98.26    1.17   3
 -12   8  12   91.43    0.96   3
 -12  11   8    1.07    0.37   3
 -12  11  10   11.49    0.46   3
 -11   5   5   22.23    0.69   3
 -11   6  13    8.19    0.70   3
 -10   3   5   27.97    0.66   3
  -9   2  11   76.76    0.87   3
  -9   3   3    2.34    0.43   3
  -7   0   7   25.02    0.45   3
 -12   8   7    0.32    0.68   3
 -12   9   7   28.85    0.78   3
 -12   9  11   43.10    0.77   3
 -12  10   8    2.49    0.54   3
 -12  10  11    5.63    0.43   3
 -11   4   8    3.27    0.66   3
 -11   4   9   73.12    1.09   3
 -11   5  12    6.79    0.65   3
 -10   4   4   60.84    0.77   3
 -10   6  14   37.96    0.73   3
 -10   7   2   21.02    0.55   3
  -9   2   5   67.82    0.73   3
  -9   4   2   12.12    0.42   3
  -9   7  15    1.27    0.43   3
  -8   1   5  152.43    0.91   3
  -8   1   9  460.32    1.65   3
 -12   7  10    1.27    0.61   3
 -12   8   8   24.92    0.75   3
 -12   8   9    0.53    0.70   3
 -12   8  10   93.34    1.09   3
 -12   9  10    2.02    0.60   3
 -12  10   9   19.56    0.56   3
 -12  10  10    2.93    0.45   3
 -11   5  11    5.87    0.80   3
 -11   7  13   16.69    0.62   3
 -11   8   4  187.16    1.30   3
 -11   9   4   91.44    0.95   3
 -11  10  13   34.55    0.56   3
 -11  11   5    1.94    0.49   3
 -10   3  10   30.03    0.76   3
 -10   5  13   69.50    0.98   3
  -9   2  10  163.30    1.15   3
  -8   1   6    4.17    0.37   3
  -8   1   8  195.24    1.13   3
  -8   2   3  131.93    0.82   3
  -6   0   8  274.88    1.09   3
  -6   1  11    7.25    0.39   3
  -5   0   9  861.09    1.77   3
 -11   5   7   11.75    0.80   3
 -11   6  12    7.96    0.68   3
 -11   9  13    5.28    0.44   3
 -10   3   8    2.66    0.58   3
 -10   4   5  130.47    1.10   3
 -10   6   3   13.01    0.64   3
 -10   8  14   10.41    0.58   3
 -10   9  14    3.70    0.45   3
 -10  10  14    6.79    0.38   3
  -9   2   7   74.61    0.87   3
  -8   3   2   38.75    0.54   3
 -11   6   6    7.23    0.65   3
 -11   7  12    6.68    0.63   3
 -11   8   5   23.93    0.82   3
 -11  10   5   81.51    0.91   3
 -11  10  12   11.95    0.54   3
 -11  12  10    1.47    0.36   3
 -10   4  11    2.02    0.62   3
  -9   3  11   14.40    0.67   3
  -9   6  14    7.97    0.63   3
  -7   1   4  460.38    1.35   3
  -7   2   2   81.66    0.62   3
 -11   6  10    0.27    0.78   3
 -11   9   5   16.81    0.66   3
 -11   9  12   46.60    0.75   3
 -11  11   6   23.87    0.59   3
 -11  11  11    7.61    0.44   3
 -11  12   8    1.63    0.36   3
 -10   4  10   33.61    0.87   3
 -10   5  12   10.38    0.64   3
 -10   7   3   60.53    0.87   3
  -8   2   4   55.05    0.59   3
  -7   1   9    6.21    0.37   3
 -11   7  11    5.41    0.66   3
 -11   8   6    7.93    0.74   3
 -11  10   6   -0.25    0.62   3
 -11  10  11   25.66    0.69   3
 -11  11   7   18.74    0.64   3
 -11  11  10    5.04    0.50   3
 -10   4   7   35.90    0.82   3
 -10   7  13    2.51    0.54   3
 -10   9   3   94.94    1.01   3
 -10  10  13    4.98    0.46   3
  -9   3   5   25.53    0.56   3
  -9   5  13    2.85    0.57   3
  -9   7  14   15.35    0.57   3
  -9  10  14    3.91    0.39   3
  -7   1   5   62.32    0.59   3
  -7   1   8   67.24    0.67   3
  -7   2  11  237.48    1.23   3
  -7   3   1    1.96    0.23   3
  -6   1  10   11.83    0.37   3
 -11   7   7   21.34    0.76   3
 -11   7   8   87.87    1.14   3
 -11   7   9    4.68    0.77   3
 -11   7  10   27.37    0.79   3
 -11   9   6   20.51    0.73   3
 -11   9  11   12.90    0.62   3
 -11  10   7   12.56    0.67   3
 -11  10  10    2.24    0.58   3
 -11  11   8   12.93    0.54   3
 -10   5   5  253.46    1.43   3
 -10   6  12    5.62    0.62   3
 -10   8  13    0.24    0.48   3
 -10   9  13    6.95    0.49   3
 -10  11   4    8.95    0.57   3
 -10  13   6   -0.26    0.31   3
  -9   6   2   21.13    0.59   3
  -9   9  14   10.86    0.52   3
  -8   2   5  122.05    0.83   3
  -8   5   1  628.22    1.74   3
  -8   6  14  107.08    1.01   3
  -7   1   6  395.13    1.33   3
  -7   1   7    5.12    0.34   3
 -11   8   8   15.94    0.83   3
 -11   8   9   80.97    1.11   3
 -11   8  10    8.83    0.65   3
 -11   9   7   94.03    1.03   3
 -11   9   8    2.17    0.72   3
 -11   9   9   22.34    0.80   3
 -11   9  10   22.14    0.68   3
 -11  10   8    1.61    0.54   3
 -10   7   4  110.24    1.13   3
 -10  11  12    6.62    0.42   3
 -10  12   5    1.83    0.48   3
 -10  12  11    0.30    0.37   3
 -10  13   8    2.20    0.38   3
  -9   3   7   22.33    0.60   3
  -9   3   8  626.98    2.07   3
  -9   3   9   34.10    0.70   3
  -9   4   4   20.36    0.52   3
  -9   4  11    4.37    0.68   3
  -9   5   3  141.62    1.04   3
  -8   2   6   73.48    0.71   3
  -8   2   7  107.83    0.88   3
  -8   2   8  210.64    1.18   3
  -8   4   2   94.85    0.76   3
  -7   3  12  148.64    1.07   3
  -6   1   9  233.30    1.05   3
  -5   1  10   51.00    0.53   3
 -10   6  11    1.88    0.63   3
 -10   8  12    3.65    0.67   3
 -10   9   4  221.95    1.45   3
 -10  10   4   66.67    0.93   3
 -10  10  12   92.57    0.96   3
  -9   7   2  148.73    1.09   3
  -9  11  13    1.19    0.37   3
  -8   4  12  379.34    1.74   3
  -8   7  14   17.83    0.58   3
  -7   6  14   40.46    0.70   3
 -10   9  12   43.69    0.77   3
 -10  11   5   81.21    0.95   3
 -10  11  11  100.30    0.96   3
 -10  12   6   77.58    0.83   3
 -10  12  10   21.97    0.53   3
  -9   4   5  214.94    1.22   3
  -9   7  13   16.33    0.62   3
  -9  10  13    8.31    0.50   3
  -8   3   4  150.16    0.91   3
  -8   9  14    1.67    0.47   3
  -6   1   8    5.41    0.35   3
 -10   6   6  110.07    1.09   3
 -10   7   5   29.02    0.73   3
 -10   7  11   24.11    0.74   3
 -10  10   5   12.59    0.76   3
 -10  12   7   -0.31    0.45   3
 -10  12   9    0.48    0.41   3
  -9   4   9   16.28    0.74   3
  -9   5   4   24.10    0.62   3
  -9   6   3  195.03    1.18   3
  -9   8  13   41.82    0.74   3
  -9   9  13   39.99    0.70   3
  -8   6   1   20.36    0.45   3
  -7   2   9  136.82    0.93   3
  -7   3   2   25.57    0.40   3
  -7   7  14   45.33    0.73   3
 -10   6   8   21.84    0.75   3
 -10   7   6   18.11    0.79   3
 -10   7  10    8.28    0.72   3
 -10   8  11    0.98    0.59   3
 -10   9  11   46.55    0.83   3
 -10  11   6   12.25    0.62   3
 -10  11  10    5.13    0.52   3
  -9   4   7  111.14    0.99   3
  -9   4   8   46.31    0.76   3
  -9  11   3    4.69    0.55   3
  -8   4   3  425.07    1.47   3
  -8   4  11  161.79    1.20   3
  -8   5   2   38.48    0.59   3
  -7   4   1  398.94    1.26   3
  -6   1   7   53.33    0.52   3
 -10   7   7  133.31    1.21   3
 -10   9   6    4.68    0.74   3
 -10   9  10   17.96    0.80   3
 -10  10   6   40.45    0.80   3
 -10  10  10   22.67    0.70   3
 -10  11   7   16.35    0.59   3
 -10  11   8    0.50    0.52   3
 -10  11   9   21.38    0.64   3
  -9   5   5    4.78    0.57   3
  -9   5  10   78.07    0.96   3
  -9   7   3   61.39    0.79   3
  -9   7  12    2.95    0.57   3
  -9  11  12   11.47    0.49   3
  -9  12   4   12.07    0.61   3
  -9  12  11   11.55    0.53   3
  -9  13  10   16.29    0.45   3
  -8   3   6   37.79    0.58   3
  -8   3   8    0.72    0.50   3
  -8   7   1  103.54    0.85   3
  -8   7  13   80.77    1.01   3
  -8  11  13    6.20    0.46   3
  -7   2   5 1431.33    2.46   3
  -7   2   8   84.54    0.72   3
  -7   8  14    0.28    0.41   3
 -10   9   7   12.33    0.81   3
 -10   9   8   57.56    1.00   3
 -10   9   9  140.81    1.31   3
 -10  10   7   11.73    0.67   3
 -10  10   8   18.88    0.80   3
 -10  10   9    0.98    0.59   3
  -9   5   9    8.66    0.72   3
  -9   8   3    6.33    0.54   3
  -9   8  12    4.29    0.57   3
  -9   9  12   46.72    0.81   3
  -9  10   3   26.09    0.68   3
  -9  13   9    1.15    0.38   3
  -8   3   7  207.07    1.15   3
  -8   8  13   11.58    0.69   3
  -8  10  13   22.46    0.63   3
  -7   3   3  475.92    1.42   3
  -6   5  13    7.13    0.53   3
  -5   1   8  564.60    1.44   3
  -9  11   4   36.35    0.79   3
  -9  11  11   -0.12    0.54   3
  -9  12  10    3.44    0.52   3
  -9  13   7    5.06    0.45   3
  -9  13   8   12.00    0.47   3
  -8   4   4  229.83    1.13   3
  -8   5  11   18.07    0.70   3
  -8   6   2  171.66    1.05   3
  -8   9  13    4.76    0.52   3
  -8  12  12   37.45    0.59   3
  -8  13  11    1.69    0.38   3
  -7   3  10    9.71    0.45   3
  -6   2   9   62.31    0.64   3
  -6   3  11  633.18    1.88   3
  -6   4  12  189.76    1.17   3
  -6   9  14    2.00    0.44   3
  -9   8  11   44.80    0.92   3
  -9   9  11   24.64    0.82   3
  -9  10  11   95.87    1.07   3
  -8   4   5   37.88    0.64   3
  -8   4   9    0.39    0.56   3
  -8  14   9    0.80    0.32   3
  -7   4  11  219.85    1.29   3
  -7   5   1  270.03    1.11   3
  -7   5  12  204.50    1.33   3
  -7  11  13    4.24    0.46   3
  -9   6   6    0.71    0.54   3
  -9   6   7  232.99    1.46   3
  -9   6   9   71.19    0.95   3
  -9   7   5  140.80    1.19   3
  -9   8   4   12.27    0.62   3
  -9  10   4   77.76    0.95   3
  -9  11   5   70.04    1.01   3
  -9  11  10   41.24    0.76   3
  -9  12   6   29.05    0.69   3
  -9  12   8   10.39    0.62   3
  -9  12   9    3.23    0.50   3
  -8   4   6  160.01    1.06   3
  -8   4   8  252.43    1.37   3
  -8   7   2    2.05    0.48   3
  -8  11  12   22.76    0.58   3
  -8  14   7    4.38    0.43   3
  -7   3   4   10.48    0.35   3
  -7   3   9  214.67    1.14   3
  -7  10  13    2.90    0.53   3
  -9   7   9    4.58    0.79   3
  -9   8  10   43.52    0.86   3
  -9  10   5   77.73    1.06   3
  -9  10  10    1.10    0.60   3
  -9  11   9    0.53    0.65   3
  -8   4   7    2.19    0.45   3
  -8   5  10   57.36    0.82   3
  -8   6  11    4.86    0.58   3
  -8   8  12   19.70    0.66   3
  -8   9  12    2.83    0.64   3
  -8  10  12    7.72    0.55   3
  -8  12   3    5.22    0.56   3
  -8  12  11   37.94    0.66   3
  -8  13   4    0.19    0.50   3
  -8  13  10   17.21    0.51   3
  -7   3   8  241.73    1.21   3
  -7   9  13    5.71    0.53   3
  -6   3  10   40.33    0.61   3
  -9   7   6  290.55    1.58   3
  -9   8   5   32.34    0.74   3
  -9  10   9   64.67    1.03   3
  -9  11   6   50.19    0.83   3
  -9  11   7   -0.35    0.58   3
  -9  11   8   15.00    0.69   3
  -8   5   9  136.20    1.13   3
  -8   8   2   39.30    0.67   3
  -8   9   2  137.10    1.11   3
  -8  13   9   11.89    0.56   3
  -7   3   6    7.85    0.46   3
  -7   3   7   14.21    0.44   3
  -7   4  10   53.21    0.70   3
  -7   5  11    1.41    0.55   3
  -7   6  12    1.15    0.55   3
  -7  12  12    2.14    0.32   3
  -7  13  11    0.39    0.39   3
  -7  14  10    0.83    0.33   3
  -6   2   5  115.55    0.70   3
  -6   2   7   42.12    0.50   3
  -6  11  13    5.22    0.45   3
  -5   2   9   76.95    0.64   3
  -9   8   6    1.29    0.60   3
  -9   8   7    9.97    0.76   3
  -9   9   8  234.78    1.61   3
  -9   9   9   59.18    0.95   3
  -9  10   6    1.41    0.58   3
  -9  10   7   30.73    0.80   3
  -8   5   5  207.62    1.18   3
  -8  11   3    3.79    0.64   3
  -8  12  10  104.54    0.99   3
  -7   5   2   10.20    0.40   3
  -7   6   1   71.97    0.65   3
  -6   5   0  864.64    1.76   3
  -6   8  13   19.93    0.65   3
  -6  10  13    0.98    0.49   3
  -8   6   4   72.04    0.78   3
  -8   8  11    0.48    0.59   3
  -8   9  11   82.11    1.02   3
  -8  10  11   -0.31    0.57   3
  -8  12   4   88.89    0.97   3
  -8  13   6    4.60    0.53   3
  -8  13   7   67.78    0.84   3
  -7   4   9    7.55    0.46   3
  -7   8  12   10.72    0.66   3
  -7  10  12    0.04    0.55   3
  -7  14   4    1.42    0.46   3
  -7  14   9    7.06    0.40   3
  -6   9  13    5.12    0.49   3
  -8   6   9   24.37    0.68   3
  -8   8   3    1.22    0.50   3
  -8   9   3  107.09    1.09   3
  -8  11  10   18.68    0.68   3
  -8  12   9   17.04    0.63   3
  -7   5  10  160.75    1.17   3
  -7   6  11   12.10    0.58   3
  -7  12  11    2.25    0.46   3
  -7  13  10    6.65    0.47   3
  -6   3   3 1132.72    2.02   3
  -6  12  12   62.09    0.75   3
  -5   2   8  444.49    1.36   3
  -5   5  12   49.55    0.72   3
  -8   6   5   68.65    0.80   3
  -8   6   6  360.51    1.64   3
  -8   6   8   30.87    0.70   3
  -8   7   4  158.76    1.12   3
  -8   9  10   54.81    0.97   3
  -8  10  10   13.09    0.66   3
  -8  11   4   29.05    0.72   3
  -8  11   9   31.26    0.83   3
  -8  12   6   57.17    0.93   3
  -8  12   7    5.05    0.67   3
  -8  12   8   20.94    0.67   3
  -7   4   8   85.67    0.80   3
  -7   8   1  192.55    1.14   3
  -7  12   2   22.39    0.68   3
  -7  13   3   30.91    0.72   3
  -7  14   7    7.03    0.50   3
  -6   3   8   70.78    0.68   3
  -6   5  11   73.65    0.90   3
  -6  13  11   42.89    0.63   3
  -6  14  10   24.94    0.50   3
  -6  15   4    0.88    0.37   3
  -5   4  11  339.76    1.43   3
  -5   9  13    2.38    0.55   3
  -5  10  13    5.77    0.46   3
  -4   2   9   66.97    0.57   3
  -4  11  13    1.59    0.38   3
  -8   6   7    6.84    0.54   3
  -8   7   5    4.84    0.63   3
  -8   7   9  144.62    1.20   3
  -8   8   4    9.02    0.55   3
  -8   9   4    1.57    0.64   3
  -8  11   5   81.32    1.05   3
  -7   4   7  418.57    1.55   3
  -7   9   1    2.62    0.41   3
  -7  11  11   93.28    1.00   3
  -7  13   9   12.86    0.61   3
  -6   3   4  600.34    1.54   3
  -6   6   0  202.54    0.94   3
  -6  11  12   42.20    0.70   3
  -5   2   7  714.56    1.65   3
  -4  10  13    9.67    0.48   3
  -8   7   6    0.04    0.54   3
  -8   7   7  127.80    1.16   3
  -8   8   5   79.50    0.99   3
  -8   9   9   21.32    0.76   3
  -8  10   8  109.80    1.22   3
  -8  11   6   12.85    0.70   3
  -8  11   7   49.54    0.91   3
  -7   6  10    6.81    0.56   3
  -7   8  11   63.98    0.91   3
  -7  10  11   37.81    0.80   3
  -7  12  10   38.66    0.75   3
  -7  13   4    2.94    0.59   3
  -6   3   6    0.39    0.35   3
  -6   3   7 1712.57    2.79   3
  -6   4   2   12.04    0.32   3
  -6   8  12    3.53    0.55   3
  -6   9  12    8.63    0.71   3
  -6  10  12   13.95    0.58   3
  -6  14   9    3.30    0.46   3
  -5   6  12    0.92    0.53   3
  -8   8   8   99.58    1.08   3
  -8   9   5   17.35    0.67   3
  -8   9   6    2.95    0.75   3
  -8  10   6    1.59    0.63   3
  -8  10   7   35.34    0.83   3
  -7   5   8    5.25    0.48   3
  -7   7   2  106.06    0.87   3
  -7  11  10   42.86    0.90   3
  -7  13   5   38.57    0.82   3
  -7  13   7   14.79    0.69   3
  -7  13   8    3.63    0.53   3
  -6   4   9   81.02    0.75   3
  -6   6  11    9.06    0.55   3
  -6  12  11    1.66    0.47   3
  -6  13  10   21.60    0.59   3
  -6  14   3    3.27    0.52   3
  -5  14  10    8.18    0.44   3
  -4   4  11   15.59    0.46   3
  -7   5   6  102.08    0.90   3
  -7   5   7  124.18    0.95   3
  -7   6   3    4.85    0.37   3
  -7   6   9  238.72    1.38   3
  -7   8   2    4.16    0.51   3
  -7   9   2  389.36    1.72   3
  -7  10   2   -0.17    0.50   3
  -7  10  10  136.78    1.30   3
  -7  12   9   42.84    0.80   3
  -6   5  10   67.91    0.76   3
  -6   7   0   16.85    0.38   3
  -6  11  11    4.51    0.64   3
  -6  14   8    2.22    0.44   3
  -5   4  10    5.69    0.47   3
  -5  15   8    4.07    0.41   3
  -4   2   8  291.95    1.05   3
  -4   6  12  111.42    0.95   3
  -7   6   4   13.13    0.52   3
  -7  11   9   64.68    1.02   3
  -7  12   4    3.88    0.58   3
  -7  12   8   18.16    0.72   3
  -6   4   3   49.39    0.51   3
  -6   4   8   11.09    0.42   3
  -6   7  11    3.71    0.53   3
  -6  10  11  173.67    1.36   3
  -6  13   2    4.45    0.59   3
  -6  13   9   19.39    0.68   3
  -6  14   7    0.19    0.52   3
  -5   8  12   75.26    0.90   3
  -5   9  12    2.26    0.64   3
  -7   6   8   18.86    0.60   3
  -7   7   3   21.40    0.53   3
  -7   7   9    0.57    0.55   3
  -7  10   3    3.85    0.72   3
  -7  10   9    4.43    0.78   3
  -7  12   5    3.87    0.57   3
  -7  12   6   42.40    0.93   3
  -7  12   7    1.82    0.59   3
  -6   5   2  614.99    1.63   3
  -6   5   9   48.49    0.73   3
  -6   9  11   46.47    0.85   3
  -6  12  10   11.00    0.61   3
  -6  14   5    1.34    0.52   3
  -6  14   6    4.55    0.50   3
  -5   3   8  108.43    0.74   3
  -5   6  11    8.88    0.59   3
  -5  12  11   57.97    0.80   3
  -5  14   9    9.71    0.54   3
  -5  15   7   37.70    0.62   3
  -4  11  12   44.36    0.75   3
  -7   6   5   75.60    0.78   3
  -7   6   7    6.10    0.51   3
  -7   7   4    6.50    0.56   3
  -7   7   8   42.34    0.77   3
  -7   8   9   90.91    1.03   3
  -7   9   3    1.30    0.51   3
  -7  11   4    7.19    0.64   3
  -6   4   5   18.14    0.48   3
  -6   4   7  118.27    0.83   3
  -6  11  10    0.79    0.72   3
  -6  13   3    4.48    0.65   3
  -6  13   8    1.25    0.62   3
  -5  13  10    5.85    0.50   3
  -5  15   4   12.78    0.49   3
  -5  15   5   16.30    0.57   3
  -4   3   9  210.54    1.00   3
  -4   5  11  157.02    1.05   3
  -4   8  12   10.18    0.63   3
  -7   7   7   15.56    0.61   3
  -7   8   4   13.53    0.65   3
  -7   9   4  206.49    1.38   3
  -7  10   4   21.81    0.69   3
  -7  11   5   55.32    0.90   3
  -7  11   6    3.65    0.65   3
  -7  11   7   22.26    0.79   3
  -6   7   1  109.63    0.83   3
  -6   7  10    9.05    0.58   3
  -6  10  10  124.20    1.24   3
  -6  12   2    4.49    0.68   3
  -6  12   9    1.79    0.57   3
  -6  13   7   38.84    0.88   3
  -5   4   9  145.83    0.92   3
  -5   7  11    6.71    0.65   3
  -5  11  11    0.28    0.51   3
  -5  14   2    1.74    0.53   3
  -5  14   8   17.43    0.64   3
  -4   4  10   99.06    0.78   3
  -4  15   8    2.00    0.37   3
  -3  13  11    0.65    0.40   3
  -7   8   5   25.15    0.73   3
  -7   9   5   85.45    1.07   3
  -7   9   7   45.93    0.94   3
  -7  10   5    6.23    0.64   3
  -6   5   3    4.11    0.32   3
  -6   5   8   12.88    0.47   3
  -6   6   9    5.66    0.50   3
  -6   8   1   46.87    0.69   3
  -6   8  10   33.58    0.77   3
  -6   9   1  271.14    1.40   3
  -6  10   1   13.34    0.63   3
  -6  13   4   -0.24    0.58   3
  -6  13   5    3.71    0.68   3
  -6  13   6    4.07    0.69   3
  -5   3   6    7.59    0.31   3
  -5  10  11   33.66    0.77   3
  -5  12  10   16.65    0.72   3
  -5  13   9   31.53    0.76   3
  -4  12  11   10.37    0.53   3
  -3  10  12   17.00    0.64   3
  -3  14  10   -0.05    0.33   3
  -6   5   4  265.76    1.18   3
  -6   5   7   64.34    0.70   3
  -6  11   9    3.68    0.66   3
  -6  12   3   31.42    0.84   3
  -6  12   8   16.92    0.70   3
  -5   4   8   80.13    0.72   3
  -5  13   1   15.95    0.59   3
  -5  14   3    7.53    0.63   3
  -5  14   7    2.72    0.52   3
  -4   6  11   91.58    0.86   3
  -4  13  10    0.43    0.46   3
  -4  14   9   42.63    0.68   3
  -4  15   2   13.20    0.56   3
  -4  15   7    5.23    0.43   3
  -3   8  12    1.38    0.44   3
  -6   5   5   26.56    0.49   3
  -6   5   6   82.22    0.75   3
  -6   6   8   68.52    0.79   3
  -6   7   2   39.63    0.63   3
  -6  10   9   16.17    0.72   3
  -6  12   4    3.37    0.70   3
  -6  12   7    9.16    0.72   3
  -5   5   9   49.42    0.68   3
  -5  11  10   16.08    0.71   3
  -5  14   4   10.05    0.67   3
  -5  14   5   30.67    0.78   3
  -5  14   6   18.13    0.63   3
  -4  11  11   10.48    0.57   3
  -4  15   6    0.45    0.48   3
  -3   3   9   -0.05    0.28   3
  -3   4  10   37.56    0.54   3
  -3  12  11   16.92    0.57   3
  -3  16   5    2.25    0.40   3
  -2  14  10    4.62    0.37   3
  -6   6   3  192.71    1.03   3
  -6   6   7   36.30    0.68   3
  -6  10   2  274.29    1.50   3
  -6  11   8    1.33    0.64   3
  -6  12   5   11.85    0.68   3
  -6  12   6    4.41    0.65   3
  -5   7  10    4.84    0.51   3
  -5  10  10   37.22    0.92   3
  -5  12   9    5.48    0.64   3
  -5  13   2    5.26    0.68   3
  -5  13   8    5.39    0.61   3
  -4   5  10    0.33    0.38   3
  -4  12  10   72.93    0.98   3
  -4  15   4    0.00    0.52   3
  -3   6  11   27.53    0.61   3
  -3  16   4    0.82    0.37   3
  -6   6   6   11.55    0.55   3
  -6   7   8   30.27    0.68   3
  -5   4   7  169.49    0.93   3
  -5   8  10   77.13    0.94   3
  -5  13   7    3.45    0.72   3
  -4  13   9   80.21    0.96   3
  -4  14   1    0.21    0.54   3
  -3  11  11   10.92    0.66   3
  -2  12  11    0.02    0.40   3
  -6   6   5  158.77    1.01   3
  -6   8   3    7.71    0.55   3
  -6   9   3  194.71    1.31   3
  -6  11   6   14.72    0.75   3
  -5   4   6  145.44    0.85   3
  -5   5   8   98.31    0.81   3
  -5   6   9  101.84    0.90   3
  -5   7   0   14.77    0.37   3
  -5  11   9   21.39    0.75   3
  -5  12   8    0.61    0.62   3
  -5  13   6    5.97    0.77   3
  -4   6  10   25.58    0.67   3
  -4  11  10   29.60    0.84   3
  -3   7  11    5.99    0.58   3
  -3  10  11   26.76    0.77   3
  -3  15   7    3.05    0.45   3
  -1  12  11    3.48    0.40   3
  -6   7   5   36.49    0.64   3
  -6   8   4    5.00    0.56   3
  -6   9   4   22.93    0.73   3
  -6   9   7   24.06    0.74   3
  -6  10   4  444.00    1.98   3
  -6  10   5   20.26    0.73   3
  -6  10   6   42.24    0.86   3
  -5   7   9    1.57    0.57   3
  -5   8   0  137.47    0.92   3
  -5   9   0   24.56    0.58   3
  -5  10   9   33.41    0.82   3
  -5  11   1  440.44    1.92   3
  -5  12   2    6.55    0.74   3
  -4  13   8   28.68    0.84   3
  -4  14   2   21.87    0.74   3
  -4  14   6   58.48    0.95   3
  -3   5  10   78.25    0.78   3
  -3   9  11   53.30    0.91   3
  -2  11  11   10.12    0.59   3
  -2  13  10    4.74    0.48   3
  -2  14   9    1.53    0.40   3
  -2  16   5    4.79    0.42   3
  -6   8   6  109.99    1.03   3
  -6   9   5   21.47    0.68   3
  -6   9   6   16.42    0.67   3
  -5   5   2   10.89    0.32   3
  -5   5   7    9.16    0.40   3
  -4   4   8    6.35    0.34   3
  -4   5   9  294.32    1.32   3
  -4   7  10   61.08    0.81   3
  -4  10  10   14.54    0.67   3
  -4  12   9    3.17    0.63   3
  -3   3   8    7.09    0.27   3
  -3  13   9    0.82    0.52   3
  -2  16   2    2.60    0.32   3
   0   4   7   39.03    0.59   4
   0   5   6    8.21    0.44   4
   0   6   4 1829.96    3.10   4
   1   2   9  131.72    1.02   4
   1   7   6    3.04    0.60   4
   2   5   9    3.91    0.62   4
   2   8   6   61.33    1.02   4
   3   6   9    3.12    0.80   4
   3   8   7   30.84    0.89   4
   3   9   5    3.02    0.64   4
   5  10   5   49.08    1.11   4
   6   8   8   68.39    1.14   4
   6   9   7  107.56    1.40   4
   6  11   2   13.72    0.79   4
   7   4  10    0.75    0.65   4
   7  11   3   21.49    0.85   4
   8  11   3   42.00    0.85   4
   9   5   9    0.63    0.53   4
   9   7   8    5.07    0.54   4
  10   6   8    1.34    0.42   4
  10  11   2    7.07    0.50   4
  11   9   5    3.85    0.41   4
   0   2   8   18.64    0.48   4
   1   3   9   12.52    0.51   4
   3   4  10    4.01    0.61   4
   5   5  10    2.37    0.63   4
   5   7   9   17.40    0.85   4
   5   9   7   44.32    1.01   4
   6   7   9   43.05    0.97   4
   6  11   3   15.02    0.83   4
   7   8   8   -0.07    0.61   4
   7   9   7   15.13    0.78   4
   8   3  10    0.38    0.52   4
  10   8   7    1.24    0.47   4
  10   9   6    0.51    0.48   4
   0   1   8  572.02    1.63   4
   0   5   7   36.20    0.62   4
   1   4   9  264.35    1.51   4
   1   6   8  132.81    1.23   4
   1   8   3  132.79    0.97   4
   1   8   4   25.95    0.63   4
   2   1  10    5.03    0.52   4
   2   2  10   70.80    0.86   4
   2   6   9    5.69    0.76   4
   4   7   9   16.83    0.83   4
   4   9   7    9.37    0.82   4
   6  10   6   31.27    0.90   4
   7   5  10   18.19    0.75   4
   7   7   9   22.03    0.77   4
   7  10   6    8.29    0.70   4
   7  11   4   41.73    0.97   4
   8   8   8    1.87    0.56   4
   8  11   4    6.71    0.71   4
  10  10   5    1.34    0.45   4
  10  11   3    3.35    0.47   4
   0   4   8  459.33    1.75   4
   1   8   2  131.80    0.90   4
   1   8   5  285.90    1.53   4
   2   4  10   75.66    0.99   4
   2   8   7   13.21    0.71   4
   2   9   1   70.50    0.74   4
   2   9   5  101.77    1.09   4
   3  10   2   -0.36    0.48   4
   3  10   4   -0.02    0.68   4
   5   6  10   -0.40    0.66   4
   5  10   6    0.59    0.69   4
   6   6  10   28.09    0.86   4
   6  11   4    5.24    0.70   4
   8   7   9   18.80    0.70   4
   8  10   6   16.49    0.67   4
   9   6   9   10.94    0.52   4
   9   9   7    5.69    0.54   4
   9  11   4    2.07    0.54   4
   0   5   8  120.48    1.06   4
   0   6   7    3.33    0.46   4
   1   8   1   24.68    0.45   4
   2   5  10   15.03    0.82   4
   4   3  11    3.37    0.67   4
   5   9   8  131.00    1.44   4
   6   8   9    0.69    0.73   4
   6   9   8   12.08    0.75   4
   7  11   5    2.05    0.68   4
   9  10   6    1.95    0.49   4
  -1   4   6    0.82    0.28   4
   0   2   9    7.94    0.43   4
   0   3   9  436.52    1.69   4
   0   7   3  780.88    2.00   4
   0   7   5  339.93    1.50   4
   1   6   9    2.68    0.69   4
   2   7   9   16.42    0.77   4
   2   8   8    6.75    0.83   4
   3  10   5  146.83    1.33   4
   4   4  11    6.25    0.64   4
   4  11   2    4.06    0.66   4
   5  10   7  119.56    1.38   4
   6   3  11   56.45    0.86   4
   6   4  11    0.26    0.57   4
   6  10   7   27.36    0.83   4
   6  11   5    3.54    0.64   4
   7   9   8    5.96    0.60   4
  -1   4   7  149.11    0.95   4
  -1   5   5   54.30    0.57   4
   0   1   9  134.19    0.89   4
   0   4   9  124.10    1.01   4
   0   6   8  159.81    1.23   4
   0   7   2  140.36    0.83   4
   0   7   6   66.58    0.81   4
   1   1  10  175.24    1.11   4
   1   4  10    0.28    0.49   4
   1   8   7   91.37    1.06   4
   3   8   9   17.47    0.92   4
   4   7  10   -0.18    0.68   4
   6   7  10    4.08    0.60   4
   8   9   8   24.37    0.64   4
   8  10   7   18.11    0.63   4
   9   7   9    3.84    0.39   4
   9  11   5    4.49    0.46   4
   0   5   9   12.38    0.57   4
   0   7   7  420.68    1.84   4
   1   9   3    1.52    0.48   4
   1   9   4    2.78    0.48   4
   1   9   5    4.67    0.59   4
   2   2  11   -0.48    0.57   4
   2   3  11    1.81    0.54   4
   2  10   3   17.38    0.67   4
   3   5  11    8.69    0.76   4
   3   9   8    8.60    0.75   4
   4  10   7    2.45    0.69   4
   6  11   6   52.46    0.96   4
   7   7  10   20.82    0.67   4
   7  11   6   26.00    0.73   4
   7  12   3    2.45    0.59   4
   8   8   9    3.07    0.44   4
   8  12   3    8.59    0.55   4
  -1   2   8    0.87    0.28   4
  -1   3   8  142.15    0.90   4
  -1   4   8   97.73    0.85   4
  -1   5   7  166.36    1.04   4
  -1   6   5  150.81    0.96   4
   0   8   4   75.11    0.81   4
   0   8   5   37.39    0.69   4
   2  10   5   29.84    0.83   4
   4   6  11    6.28    0.73   4
   4  11   5   26.21    0.82   4
   5   6  11   15.72    0.72   4
   5  11   6   55.31    0.95   4
   6  12   3   38.47    0.84   4
   8  11   6   -0.11    0.48   4
  -1   1   8   17.19    0.37   4
  -1   6   6   48.90    0.63   4
   0   2  10  139.93    1.02   4
   0   3  10    0.87    0.44   4
   0   6   9   18.33    0.66   4
   0   8   3    4.01    0.41   4
   0   8   6    9.87    0.54   4
   3   6  11   49.47    0.92   4
   4   9   9  128.43    1.33   4
   4  10   8  114.03    1.32   4
   5   8  10    0.34    0.59   4
   6  10   8   64.56    0.94   4
   6  12   4    4.29    0.66   4
   7   9   9   -0.66    0.52   4
   7  10   8   12.14    0.60   4
   7  12   4   10.57    0.56   4
   8   7  10    1.34    0.41   4
   8  12   4   22.56    0.60   4
  -1   3   9   18.30    0.50   4
  -1   5   8   28.20    0.58   4
  -1   6   7  337.02    1.51   4
   0   5  10    6.91    0.71   4
   0   8   7   -0.40    0.65   4
   1   2  11  305.39    1.54   4
   1   3  11   83.08    0.95   4
   1   4  11   31.98    0.75   4
   1   9   7   37.68    0.84   4
   2   6  11   42.42    0.99   4
   4   7  11   25.55    0.84   4
   5  12   3    8.67    0.64   4
   7   8  10    4.73    0.50   4
  -1   4   9  522.61    1.84   4
  -1   6   8  129.83    1.10   4
  -1   7   5    9.89    0.48   4
   0   1  10    1.73    0.34   4
   0   7   9    7.87    0.72   4
   3   4  12   21.86    0.78   4
   3  10   8    0.42    0.66   4
   4   4  12   74.02    0.94   4
   5  11   7    4.50    0.59   4
   5  12   4   28.22    0.74   4
   6  12   5    3.76    0.59   4
   7  11   7   14.03    0.52   4
   7  12   5    3.55    0.49   4
   8   9   9    2.06    0.36   4
   8  10   8    4.30    0.41   4
   0   6  10   34.63    0.79   4
   0   8   8    5.76    0.61   4
   2   9   9   47.96    0.96   4
   3  11   6    6.82    0.63   4
   4   5  12    7.06    0.57   4
   4  11   7  136.39    1.29   4
   4  12   3   10.37    0.66   4
   5  10   9   66.00    0.98   4
   5  12   5    2.95    0.63   4
   8  12   5    9.16    0.42   4
  -2   4   6   88.55    0.67   4
  -1   7   3    4.21    0.34   4
   0   4  11    1.99    0.59   4
   0   9   5   88.60    0.93   4
   0   9   6   66.78    0.89   4
   1  10   3    5.60    0.46   4
   1  10   6    0.92    0.56   4
   2  11   3    4.25    0.60   4
   2  11   4    0.95    0.66   4
   3   9  10   13.43    0.82   4
   3  11   7    3.32    0.73   4
   4   6  12    2.41    0.60   4
   4   8  11   15.10    0.74   4
   4  10   9    6.94    0.62   4
   4  12   4   37.73    0.79   4
   5   8  11   23.74    0.70   4
   6   5  12    0.10    0.40   4
   6  12   6   17.57    0.63   4
  -2   3   7  743.87    1.78   4
  -2   4   7    0.93    0.30   4
  -1   3  10    4.11    0.43   4
   0   2  11   -0.45    0.41   4
   0   5  11   10.64    0.62   4
   0   7  10   21.37    0.76   4
   0   8   9   63.91    1.05   4
   0   9   7    3.97    0.60   4
   1   8  10    2.43    0.68   4
   1  10   2   24.52    0.57   4
   2  11   6    2.80    0.77   4
   3   6  12    3.14    0.53   4
   3   8  11    4.91    0.64   4
   3  10   9   27.03    0.79   4
   4  12   5   15.42    0.66   4
   5  11   8   42.05    0.78   4
   6   8  11    0.11    0.42   4
   7  10   9    3.91    0.39   4
   7  12   6    0.44    0.37   4
  -2   5   5  316.63    1.18   4
  -2   5   7  136.37    0.91   4
  -1   5  10  132.63    1.11   4
  -1   8   5  273.80    1.36   4
  -1   8   6   67.40    0.82   4
  -1   8   7  359.92    1.76   4
   0   1  11  366.66    1.52   4
   4  12   6   69.77    1.03   4
   7  11   8   13.10    0.44   4
  -2   5   8    7.34    0.43   4
  -2   6   6  297.21    1.29   4
  -2   6   7    0.83    0.38   4
  -1   1  10  106.42    0.81   4
  -1   6  10    0.17    0.54   4
  -1   8   4   19.83    0.47   4
   2  10   9    1.27    0.64   4
   2  11   7    6.89    0.64   4
   3   7  12    3.55    0.55   4
   3  11   8  108.64    1.17   4
   3  12   4    1.16    0.53   4
   4  10  10    4.85    0.61   4
   5   7  12   10.78    0.54   4
   5  10  10    2.63    0.52   4
   5  12   7   19.93    0.66   4
  -2   3   9   50.79    0.61   4
  -2   4   9  143.18    0.98   4
  -2   5   9  179.41    1.19   4
  -2   6   8  253.92    1.35   4
  -1   3  11    1.52    0.51   4
  -1   4  11   54.25    0.77   4
   0   3  12    4.13    0.58   4
   0  10   5   25.68    0.76   4
   0  10   6  109.08    1.15   4
   2   7  12    3.32    0.57   4
   3   9  11   10.05    0.70   4
   3  10  10   -0.15    0.64   4
   3  12   6    6.45    0.73   4
   4   4  13   -0.88    0.43   4
   4  11   9    8.46    0.63   4
   4  12   7    5.77    0.66   4
   5   9  11    2.90    0.43   4
   5  11   9    1.53    0.48   4
  -2   7   6   40.30    0.65   4
  -2   7   7  131.06    1.06   4
  -1   2  11  200.87    1.19   4
  -1   7  10   49.78    0.88   4
  -1   8   9   91.59    1.07   4
  -1   9   6   70.49    0.93   4
   0   2  12  101.84    0.97   4
   0  10   4    7.23    0.49   4
   1   7  12    3.90    0.74   4
   1  11   5    1.77    0.55   4
   2   9  11    5.99    0.74   4
   2  11   8    8.76    0.68   4
   4   5  13    6.06    0.52   4
   4   8  12    5.45    0.52   4
   6  11   9   32.76    0.58   4
  -2   3  10   39.65    0.63   4
  -2   5  10   36.80    0.78   4
  -2   6   9   10.44    0.55   4
  -2   7   5  244.97    1.18   4
  -1   9   5   57.60    0.77   4
   0   6  12  158.06    1.34   4
   2   5  13   34.64    0.74   4
   2   8  12    6.73    0.72   4
   2  12   5   15.57    0.75   4
   3  12   7  118.24    1.14   4
   4   6  13    1.60    0.44   4
   5   8  12    2.86    0.40   4
   5  12   8    0.64    0.45   4
   5  13   5    2.80    0.49   4
  -2   1   9   14.12    0.38   4
  -2   2  10    6.00    0.42   4
  -2   6  10   10.42    0.68   4
  -2   7   9   96.42    1.08   4
  -1   9   4   19.80    0.51   4
   0   8  11    1.55    0.67   4
   1   4  13  428.13    1.93   4
   1  11   8   69.34    1.10   4
   2  11   9   21.02    0.73   4
   2  12   6    4.66    0.69   4
   4  12   8   21.97    0.62   4
  -2   8   6  186.21    1.17   4
  -2   8   7   28.95    0.66   4
  -1   3  12   19.69    0.66   4
  -1   4  12   14.14    0.62   4
  -1   5  12  123.39    1.16   4
  -1   9   9   17.02    0.73   4
   0   7  12   21.65    0.75   4
   0  10   9    8.05    0.68   4
   1   6  13    2.39    0.62   4
   1   8  12    0.10    0.56   4
   1  10  10    4.51    0.68   4
   3   7  13    0.79    0.50   4
   3  10  11   11.87    0.57   4
   3  12   8   17.95    0.61   4
   4  10  11    3.51    0.44   4
   4  13   5   20.50    0.57   4
   5   6  13   13.31    0.43   4
   5  11  10    8.53    0.43   4
  -3   3   7  471.75    1.42   4
  -3   4   7  666.57    1.76   4
  -3   4   8  252.27    1.17   4
  -3   5   8  206.29    1.16   4
  -2   5  11   49.55    0.79   4
  -2   8   5   36.52    0.58   4
  -1   2  12   46.19    0.75   4
  -1  10   6    6.15    0.62   4
   0   5  13   69.07    1.00   4
   0   9  11   29.38    0.89   4
   1  11   9    3.93    0.75   4
   2   7  13    2.22    0.49   4
   2   9  12    0.79    0.59   4
   2  10  11    2.02    0.54   4
   3   9  12    1.63    0.46   4
   3  11  10   31.82    0.69   4
   4   9  12   18.06    0.51   4
  -3   5   6  191.90    0.98   4
  -3   5   9   61.23    0.74   4
  -3   6   8   25.00    0.64   4
  -2   1  10  181.17    0.96   4
  -2   6  11   26.32    0.73   4
  -2   8   9    0.72    0.59   4
  -1  10   7   10.19    0.63   4
   0   6  13   10.86    0.72   4
   0  11   4   15.60    0.67   4
   1  12   5    6.15    0.70   4
   1  12   6    7.50    0.71   4
   2  11  10   -0.08    0.48   4
   2  12   8   44.65    0.79   4
   3  13   5    0.94    0.56   4
   4  12   9    0.44    0.37   4
  -3   3   9    0.19    0.31   4
  -3   4  10   36.87    0.67   4
  -3   5   5  246.59    1.04   4
  -3   6   9  259.57    1.41   4
  -2   7  11   12.14    0.77   4
  -2   9   7  265.63    1.53   4
  -2   9   8   -0.01    0.66   4
  -1   7  12  166.90    1.38   4
   0  11   8    1.28    0.63   4
   2   8  13    1.80    0.46   4
   3  12   9   15.97    0.54   4
   4   8  13    1.65    0.36   4
  -3   2   9  196.82    1.00   4
  -3   3  10  254.72    1.26   4
  -3   5  10   81.02    0.88   4
  -3   6   5 1690.52    2.81   4
  -3   7   6  301.64    1.38   4
  -3   7   7   94.65    0.88   4
  -3   7   8  722.59    2.27   4
  -2   3  12   71.98    0.89   4
  -2   4  12   19.14    0.60   4
  -1   3  13    1.52    0.57   4
   0   7  13   34.58    0.79   4
   0  11   9   24.93    0.85   4
   1   4  14    3.03    0.53   4
   1   5  14   47.14    0.80   4
   1  12   8    3.40    0.67   4
   2  12   9    0.74    0.54   4
   3  10  12    4.79    0.46   4
   3  11  11    1.82    0.45   4
  -3   7   9   38.70    0.75   4
  -2   1  11   49.69    0.62   4
  -2   8   3    0.84    0.34   4
  -1   8  12   10.96    0.71   4
  -1  10  10    0.70    0.76   4
   0   9  12    7.38    0.61   4
   2   6  14   17.96    0.53   4
   2  10  12   12.52    0.51   4
   2  11  11    5.61    0.54   4
   2  13   6    2.93    0.55   4
   3   6  14    1.11    0.34   4
   4  13   8    4.38    0.40   4
  -3   1   8    6.01    0.32   4
  -3   2  10   18.21    0.44   4
  -3   7   5  221.12    1.12   4
  -3   7  10   16.00    0.67   4
  -3   8   8   33.01    0.73   4
  -2   2  12    3.18    0.42   4
  -1   7  13    1.00    0.61   4
  -1  10   3   47.68    0.64   4
  -1  11   6   27.27    0.83   4
   0   5  14    0.35    0.56   4
   0   8  13    6.48    0.59   4
   0  11  10   -0.50    0.67   4
   1  10  12   -0.07    0.47   4
   2  13   7   66.73    0.90   4
   3   9  13    6.48    0.39   4
   3  13   8    6.09    0.47   4
  -3   8   6    3.55    0.43   4
  -2  10   8  137.76    1.25   4
  -1   9  12  177.37    1.41   4
  -1  11   5   15.37    0.59   4
   0   6  14   72.54    0.91   4
   0  12   7    0.75    0.58   4
   0  12   8   23.26    0.80   4
   1   9  13    1.24    0.47   4
   2  12  10    3.28    0.44   4
  -3   4  12   85.89    0.96   4
  -3   5  12   13.16    0.61   4
  -3   7   4   71.01    0.67   4
  -3   7  11    6.79    0.64   4
  -3   8   5   40.48    0.65   4
  -2   3  13   27.98    0.70   4
  -2   6  13    1.21    0.57   4
  -2   9  11  235.27    1.60   4
  -1   4  14    2.99    0.60   4
  -1   5  14    3.31    0.62   4
  -1  10  11   57.41    0.95   4
   0   7  14    0.31    0.52   4
   1  12  10    6.05    0.55   4
   2  13   8    8.54    0.47   4
  -4   4   7    1.47    0.31   4
  -4   4   8    5.99    0.37   4
  -4   4   9    5.50    0.40   4
  -4   5   9  286.70    1.38   4
  -4   6   7  100.10    0.87   4
  -4   6   8  383.02    1.59   4
  -3   3  12   51.99    0.79   4
  -3   9   7    9.45    0.57   4
  -2   7  13    5.00    0.62   4
  -1  11  10  130.11    1.28   4
   0  11  11   13.20    0.61   4
   0  12   9   -0.21    0.52   4
   1  13   6   15.70    0.61   4
   1  13   7    4.41    0.59   4
   2  10  13    0.94    0.38   4
   3  13   9    0.83    0.33   4
  -4   3   8    0.92    0.32   4
  -4   3   9  233.46    1.13   4
  -4   4  10  100.10    0.88   4
  -3   9   6  122.44    1.02   4
  -2   9  12    0.40    0.72   4
  -2  10   4   15.72    0.58   4
  -1   7  14   62.90    0.87   4
  -1   9  13    0.06    0.61   4
  -1  10  12   38.58    0.86   4
   0   8  14   73.68    0.90   4
   1  10  13    2.02    0.46   4
   1  11  12   53.32    0.74   4
   1  13   8   24.59    0.67   4
   2  13   9    4.40    0.40   4
  -4   3  10   26.73    0.52   4
  -4   4   6  111.44    0.74   4
  -4   4  11   15.15    0.54   4
  -4   5  11  170.27    1.21   4
  -4   6  11   93.90    1.07   4
  -4   7   7  105.05    0.91   4
  -4   7  10   62.13    0.90   4
  -3   1  11   58.57    0.66   4
  -3   4  13  104.28    1.09   4
  -3   8   4   19.82    0.45   4
  -3   8  12    0.94    0.73   4
  -2   6  14    3.57    0.64   4
  -2  10  11    4.93    0.62   4
  -2  11   6    6.59    0.66   4
  -2  11   8   12.51    0.65   4
  -1  11  11    9.24    0.70   4
  -1  12   6   10.42    0.73   4
  -4   3  11  354.33    1.54   4
  -4   7   6   33.12    0.57   4
  -3   3  13   85.98    0.96   4
  -3   7  13   85.24    1.11   4
  -1   8  14   20.55    0.62   4
  -1  12   9   17.84    0.72   4
   0   5  15   79.86    0.84   4
   0   6  15   21.27    0.61   4
   0  10  13    0.52    0.44   4
   0  11  12    5.72    0.49   4
  -4   4  12   47.56    0.80   4
  -4   5   5 1776.71    2.78   4
  -4   6  12  108.14    1.11   4
  -4   8   7   29.46    0.65   4
  -3  10   6   19.05    0.73   4
  -2   7  14    0.16    0.54   4
  -2  10  12   88.09    1.05   4
  -2  11   5    3.49    0.55   4
  -1   5  15   27.52    0.70   4
  -1  10  13   73.69    0.93   4
   0   9  14   30.08    0.60   4
   0  12  11   10.20    0.54   4
   0  13   6    0.61    0.48   4
   0  13   8   -0.09    0.54   4
  -4   3  12   -0.20    0.56   4
  -4   7   5  160.22    1.01   4
  -4   9   9   13.03    0.78   4
  -3   1  12  134.62    0.96   4
  -3   9  12  126.37    1.25   4
  -2   8  14   21.32    0.73   4
  -2  10   3    7.91    0.40   4
  -2  11  11    9.96    0.71   4
  -1   9  14   49.52    0.79   4
  -1  11  12   85.64    0.94   4
  -1  12  10   10.32    0.56   4
  -5   5   9   49.74    0.75   4
  -4   1   9   28.61    0.47   4
  -3   4  14    0.34    0.50   4
  -3   8   3  265.60    1.16   4
  -3  10   5    2.40    0.55   4
  -2  11   4   16.14    0.60   4
  -2  12   8   44.99    0.91   4
   0   8  15   -0.20    0.38   4
   0  11  13   20.49    0.55   4
  -5   4   8   82.95    0.78   4
  -5   4   9  143.37    0.98   4
  -5   5   8  100.14    0.85   4
  -5   6   9  104.37    0.97   4
  -4   1  10  131.48    0.84   4
  -4   2  12  103.44    0.92   4
  -4   4  13    1.14    0.53   4
  -4   5   4  550.30    1.48   4
  -4   6   4  115.61    0.77   4
  -4   7  13    6.83    0.77   4
  -4   9  11  111.28    1.19   4
  -3   7  14    2.28    0.58   4
  -3   9  13    9.67    0.73   4
  -3  10  12   17.01    0.78   4
  -3  11   8  173.75    1.35   4
  -3  11   9    2.65    0.63   4
  -2   4  15    0.04    0.53   4
  -2   5  15   25.91    0.63   4
  -2   6  15   63.74    0.85   4
  -2   9  14    6.33    0.58   4
  -2  10  13   38.31    0.73   4
  -2  12   6   84.17    1.03   4
  -1  12  11    3.39    0.47   4
  -5   5   7    9.20    0.41   4
  -5   6   7   16.57    0.50   4
  -5   7  11    7.38    0.75   4
  -4   1  11   36.82    0.57   4
  -4   3  13   80.30    0.89   4
  -4   9   6   68.43    0.83   4
  -4  10   8    4.88    0.70   4
  -3   8  14   58.18    0.94   4
  -3  11  10  209.90    1.49   4
  -2  11  12   25.10    0.67   4
  -2  12  10  110.20    1.06   4
  -1  10  14    7.63    0.47   4
  -1  11  13   14.00    0.54   4
  -1  13   6    3.43    0.60   4
  -1  13   8   32.48    0.67   4
  -1  13   9    0.72    0.53   4
  -5   6  12    1.89    0.61   4
  -5   8   8    1.04    0.66   4
  -5   8  10   84.28    1.04   4
  -4   6  14   24.27    0.83   4
  -4   7   4   14.99    0.40   4
  -4   8  13   15.83    0.70   4
  -4  10  10   16.12    0.72   4
  -3   7   2    6.18    0.30   4
  -3   9   3    6.50    0.42   4
  -3  10   4  182.73    1.18   4
  -3  11  11   10.63    0.65   4
  -2   8  15    2.78    0.48   4
  -1  12  12    0.00    0.41   4
  -5   3   7   58.15    0.59   4
  -4   2  13   91.06    0.93   4
  -4   7  14    8.83    0.65   4
  -4   9   5   90.30    0.88   4
  -4  10  11    2.05    0.66   4
  -3   4  15   38.42    0.78   4
  -3   6  15    9.28    0.58   4
  -3   7  15    6.48    0.58   4
  -3   9  14   30.30    0.76   4
  -3  11   5    2.88    0.60   4
  -2  11  13   22.34    0.62   4
  -2  12  11   -0.15    0.46   4
  -1   9  15    0.02    0.31   4
  -5   2   8  446.39    1.45   4
  -5   4   6  151.20    0.88   4
  -5   4  13    4.01    0.61   4
  -5   7   6   66.13    0.74   4
  -5   8  12   83.26    1.10   4
  -5   9   9    2.83    0.63   4
  -4   1  12    0.62    0.35   4
  -4   8   4  157.74    0.98   4
  -4   8  14    3.31    0.68   4
  -4   9  13   48.44    0.88   4
  -4  10  12   31.99    0.87   4
  -3  11  12   18.78    0.64   4
  -3  12   8   24.71    0.80   4
  -1   6  16    1.26    0.27   4
  -5   2  11  122.41    0.93   4
  -5   8   6   58.17    0.79   4
  -5   9   8   36.42    0.79   4
  -5   9  11   98.27    1.14   4
  -4  11   8    0.98    0.61   4
  -4  11  10   31.06    0.87   4
  -2   9  15    2.73    0.38   4
  -2  13   7    1.47    0.58   4
  -2  13   8    5.05    0.52   4
  -2  13   9   32.95    0.73   4
  -6   5   9   49.10    0.74   4
  -6   5  10   67.72    0.85   4
  -6   6   9    5.02    0.54   4
  -5   2  12   27.57    0.65   4
  -5   3  13    3.48    0.54   4
  -5   5   5   25.20    0.45   4
  -5   5  14   74.99    1.01   4
  -5   8  13  166.36    1.37   4
  -5   9  12    2.65    0.63   4
  -4   4  15   42.58    0.81   4
  -4   5  15    4.73    0.55   4
  -4   6  15    5.05    0.53   4
  -4   7   3    4.45    0.35   4
  -4   7  15   48.23    0.84   4
  -4   9   4    3.38    0.47   4
  -4   9  14    2.86    0.61   4
  -4  10   5   13.00    0.63   4
  -4  10  13   10.27    0.67   4
  -3  10  14    4.89    0.47   4
  -3  11  13    3.64    0.52   4
  -3  12   6   33.02    0.82   4
  -3  12  11   17.03    0.63   4
  -2   7  16    0.64    0.37   4
  -6   4   9   80.15    0.81   4
  -6   4  10   92.20    0.90   4
  -6   5   8   12.50    0.50   4
  -6   7   9  168.08    1.26   4
  -6   7  10    8.72    0.65   4
  -6   7  11    2.90    0.64   4
  -5   7   5   27.79    0.52   4
  -5   7  14    8.75    0.66   4
  -5  10  10   38.91    0.86   4
  -5  10  11   34.52    0.96   4
  -4   2  14   39.71    0.67   4
  -3   9  15   20.06    0.54   4
  -2   8  16    0.89    0.34   4
  -2  11  14    0.02    0.33   4
  -6   3  10   39.02    0.69   4
  -6   4   8   11.22    0.46   4
  -6   7   8   31.06    0.70   4
  -6   8   9    1.09    0.61   4
  -5   1   8  522.87    1.50   4
  -5   1  11   39.98    0.62   4
  -5   9   6   92.85    0.96   4
  -5   9  13    2.11    0.61   4
  -5  10  12  107.50    1.19   4
  -4   3  15   42.67    0.77   4
  -4   8   3    7.48    0.40   4
  -4  11  12   45.10    0.80   4
  -2  10  15   -0.06    0.31   4
  -2  12  13    1.45    0.35   4
  -2  13  11   28.14    0.54   4
  -6   3   9   86.34    0.79   4
  -6   3  11  635.98    2.06   4
  -6   5   7   64.43    0.72   4
  -6   7  13  250.58    1.65   4
  -6   8  12    3.54    0.66   4
  -5   2   6  230.46    0.96   4
  -5   3   5  184.91    0.86   4
  -5   6  15    7.75    0.64   4
  -4  10  14  133.22    1.09   4
  -4  12   8  151.15    1.30   4
  -4  12   9    3.02    0.59   4
  -4  12  10   73.73    0.97   4
  -3   8  16   14.90    0.49   4
  -3  13   8   91.27    1.00   4
  -3  13   9    1.86    0.56   4
  -6   4   7  120.05    0.87   4
  -6   9  11   44.95    0.90   4
  -5   1   7  279.19    1.06   4
  -5   1  12  317.30    1.38   4
  -5   9  14   85.04    0.99   4
  -5  10  13    5.04    0.62   4
  -5  11  11    0.41    0.66   4
  -4   9  15   19.81    0.55   4
  -4  10   4  167.10    1.10   4
  -4  11   5    2.22    0.58   4
  -4  11  13    3.01    0.47   4
  -4  12   7   -0.62    0.67   4
  -4  12  11    9.54    0.59   4
  -3  10  15    3.76    0.39   4
  -3  13   7    4.36    0.59   4
  -6   2   9   59.42    0.70   4
  -6   2  10  143.72    0.97   4
  -6   3  13   31.70    0.81   4
  -6   5   6   80.58    0.79   4
  -6   6   6   11.43    0.47   4
  -6   6  14    4.18    0.59   4
  -6   7  14    6.77    0.75   4
  -6   8   7   16.63    0.62   4
  -6   9  12   10.03    0.72   4
  -5   7   4  206.36    1.08   4
  -5   9   5    8.13    0.50   4
  -5  10   6   12.12    0.62   4
  -4   7  16    3.31    0.44   4
  -4   9   3  258.10    1.24   4
  -3  12  13    3.85    0.36   4
  -3  13  11    0.24    0.41   4
  -2  14   9    1.62    0.39   4
  -7   5  10  159.40    1.27   4
  -7   5  11    1.71    0.71   4
  -7   6  11   12.59    0.69   4
  -6   4   6   50.47    0.64   4
  -6   7   6   32.18    0.63   4
  -6   8  14   20.11    0.81   4
  -6   9   7   24.48    0.78   4
  -6   9  13    5.11    0.64   4
  -6  10   9   15.60    0.80   4
  -6  10  10  130.28    1.25   4
  -6  10  11  173.23    1.46   4
  -5   3  15    2.67    0.60   4
  -5   4   4 1114.94    2.08   4
  -5   8   4  102.29    0.88   4
  -5  11  12  103.52    1.05   4
  -4   8  16    3.04    0.40   4
  -4  10  15    7.90    0.45   4
  -4  11  14    2.09    0.44   4
  -4  12   6  171.51    1.31   4
  -4  12  12   13.97    0.52   4
  -7   4  10   54.75    0.86   4
  -7   4  11  230.07    1.44   4
  -7   6   9  255.39    1.48   4
  -7   7   9    0.75    0.69   4
  -6   2   8   69.21    0.66   4
  -6   8   6  110.76    0.99   4
  -6  10  12   14.98    0.70   4
  -5   0   9  878.67    1.91   4
  -5   5  16   67.35    0.87   4
  -5  10   5   13.22    0.64   4
  -5  11  13    0.26    0.52   4
  -4   7   2    6.44    0.27   4
  -7   5   8    5.34    0.62   4
  -7   6   8   19.85    0.64   4
  -7   6  13  316.62    1.76   4
  -7   7   8   44.04    0.87   4
  -7   7  13   39.55    0.86   4
  -7   8   9   89.27    1.14   4
  -7   8  11   63.02    1.00   4
  -7   8  12   10.47    0.75   4
  -6   7  15    2.97    0.54   4
  -6   9  14    2.64    0.54   4
  -6  10  13    1.73    0.62   4
  -5   7  16   11.51    0.52   4
  -5   9   4  270.29    1.39   4
  -5  12   9    5.66    0.68   4
  -5  12  10   16.46    0.64   4
  -5  12  11   60.65    0.87   4
  -4   8   2  245.76    1.08   4
  -4   9  16    8.93    0.38   4
  -4  12  13    0.47    0.34   4
  -4  13   8   29.66    0.72   4
  -4  13   9   81.26    0.93   4
  -4  13  10    0.56    0.47   4
  -7   3  10   10.00    0.52   4
  -7   3  11   41.75    0.71   4
  -7   4   8   85.59    0.89   4
  -7   4  13   68.34    0.92   4
  -7   9  11   16.67    0.83   4
  -6   1   9  228.44    1.12   4
  -6   1  10   11.89    0.42   4
  -6   3   6    0.39    0.31   4
  -6   5   5   24.10    0.47   4
  -6   7   5   36.84    0.60   4
  -6  10   7   38.39    0.89   4
  -6  11  10    0.57    0.67   4
  -5   4  16    4.66    0.47   4
  -5   6   3   15.11    0.41   4
  -5   8  16    0.52    0.37   4
  -4   6  17   -0.06    0.33   4
  -7   3  12  151.98    1.16   4
  -7   6   7    5.54    0.53   4
  -7   7   7   17.16    0.70   4
  -6   1  12  128.28    0.97   4
  -6   2  14   61.24    0.86   4
  -6   4   5   17.67    0.41   4
  -6   8   5    0.71    0.56   4
  -6  10  14   31.70    0.73   4
  -6  11   9    3.67    0.61   4
  -6  11  12   45.20    0.84   4
  -5   7   3   81.59    0.68   4
  -5  10  15   14.79    0.48   4
  -5  12   7    4.39    0.68   4
  -5  12  12    8.88    0.48   4
  -7   3   8  236.75    1.27   4
  -7   4  14    1.27    0.57   4
  -7   8  14    0.45    0.58   4
  -7   9   8  168.95    1.42   4
  -7  10  11   39.01    0.95   4
  -6   1   8    5.41    0.33   4
  -6   5  16   14.85    0.63   4
  -6   7  16   22.47    0.65   4
  -6  11   8    1.54    0.63   4
  -5   9  16    5.81    0.37   4
  -5  12  13    8.47    0.45   4
  -4  13  12   -0.06    0.16   4
  -8   5  11   17.03    0.84   4
  -8   6  10  163.15    1.38   4
  -7   2  10    0.54    0.42   4
  -7   4   7  412.96    1.60   4
  -7   5  15   86.73    1.05   4
  -7   9  14   20.01    0.72   4
  -7  10   9    4.71    0.80   4
  -7  10  10  142.15    1.31   4
  -7  10  12   -0.10    0.59   4
  -6   2   6   17.92    0.39   4
  -6   9   5   20.48    0.69   4
  -6  11   7   16.29    0.76   4
  -6  11  13    8.95    0.51   4
  -5   7  17    0.27    0.34   4
  -8   4  11  156.72    1.29   4
  -8   5  10   56.68    0.88   4
  -8   6   9   24.99    0.82   4
  -8   6  13    3.69    0.65   4
  -8   7  12   23.81    0.80   4
  -8   7  13   82.14    1.17   4
  -8   8  11    0.38    0.77   4
  -7   5   6   98.77    0.91   4
  -7  10  13    3.01    0.54   4
  -6   1   7   48.51    0.53   4
  -6   3   5 1065.99    2.12   4
  -6   5   4  249.20    1.13   4
  -6   6   4   21.45    0.45   4
  -6   7   4   88.75    0.83   4
  -6  10  15    0.72    0.42   4
  -6  12  10   10.86    0.61   4
  -6  12  11    1.59    0.56   4
  -5  13  10    5.19    0.43   4
  -8   5   9  138.28    1.16   4
  -8   6  14  110.81    1.21   4
  -8   7   9  148.10    1.28   4
  -8   8  13   12.65    0.80   4
  -7   2   8   87.88    0.81   4
  -7   3   7   14.58    0.46   4
  -7  11  11   91.87    1.07   4
  -6   0  10  257.44    1.16   4
  -6   8   4    4.70    0.47   4
  -6   9  16   -0.31    0.36   4
  -6  12  12   61.40    0.76   4
  -5   9   3    0.72    0.34   4
  -5  13   8    5.67    0.54   4
  -8   3  12  379.64    1.81   4
  -8   4   9    1.04    0.53   4
  -8   9  10   58.38    1.05   4
  -8   9  11   88.36    1.12   4
  -8   9  12    2.47    0.66   4
  -7   1  11  146.23    1.07   4
  -7   5  16    3.13    0.60   4
  -7   6  16    0.57    0.51   4
  -7   7  16   21.37    0.63   4
  -7  10  14    4.02    0.46   4
  -7  11   9   68.90    1.07   4
  -7  11  10   41.11    0.82   4
  -7  11  12   31.75    0.69   4
  -6   4   4   10.12    0.35   4
  -6  10   5   19.85    0.69   4
  -6  12   8   19.17    0.66   4
  -6  12  13    4.24    0.41   4
  -8   6  15    8.17    0.66   4
  -8   8   8  101.17    1.19   4
  -8   8  14   16.71    0.68   4
  -8   9   9   20.62    0.86   4
  -8   9  13    4.91    0.59   4
  -7   1  12   87.46    0.90   4
  -7   4  16    1.83    0.56   4
  -7   9   6  103.88    1.12   4
  -7  11  13    4.07    0.46   4
  -6   1   6  158.27    0.84   4
  -6   2   5  117.61    0.73   4
  -6   5  17   22.76    0.53   4
  -6   9   4   22.67    0.62   4
  -5   6   2  514.25    1.46   4
  -5   7   2  155.47    0.88   4
  -8   3   9   25.74    0.67   4
  -8   6   7    6.07    0.68   4
  -8   8  15   12.15    0.62   4
  -8   9  14    2.10    0.52   4
  -8  10  10   12.76    0.80   4
  -8  10  11    0.09    0.62   4
  -8  10  12    9.13    0.71   4
  -7   1   9    6.83    0.38   4
  -7   2   7  311.46    1.29   4
  -7   5   5  185.69    1.10   4
  -7  10  15   23.53    0.57   4
  -7  11   8   25.50    0.73   4
  -6  12   7    9.44    0.58   4
  -9   6  12   69.16    1.05   4
  -9   6  13   14.61    0.85   4
  -9   7  11   19.20    0.89   4
  -9   7  12    3.40    0.82   4
  -8   4  15    6.16    0.68   4
  -8   7   7  129.45    1.16   4
  -8  10   9   52.09    1.01   4
  -8  10  13   25.46    0.68   4
  -7   8   5   22.97    0.63   4
  -7   9  16   21.56    0.50   4
  -7  11  14   18.48    0.51   4
  -7  12  10   43.62    0.81   4
  -7  12  11    1.76    0.56   4
  -6   3   4  576.71    1.53   4
  -6  13  10   22.43    0.56   4
  -5   8   2    8.00    0.37   4
  -9   5  11   54.45    0.94   4
  -9   5  13    3.81    0.66   4
  -9   6  10   43.62    0.91   4
  -9   7  13   16.97    0.76   4
  -9   8  11   46.49    0.96   4
  -9   8  13   44.21    0.94   4
  -8   2  13    5.11    0.69   4
  -8   3   8    0.96    0.46   4
  -8   6  16   22.38    0.68   4
  -8   7  16    8.51    0.55   4
  -8  10  14   10.44    0.57   4
  -7   7  17    1.52    0.37   4
  -7  10   6    0.69    0.55   4
  -7  11   7   23.01    0.71   4
  -7  12  12    3.82    0.44   4
  -9   4  10   10.75    0.76   4
  -9   5  14   40.26    0.85   4
  -9   6  14    7.94    0.68   4
  -9   7   9    5.34    0.80   4
  -9   8  10   44.06    0.92   4
  -9   9  12   51.33    0.97   4
  -8   2   9    1.25    0.44   4
  -8   6   6  354.26    1.68   4
  -8  10   8  123.52    1.29   4
  -8  11  10   19.29    0.77   4
  -8  11  11   16.21    0.61   4
  -8  11  12   23.16    0.67   4
  -7   0  11    6.40    0.49   4
  -7   2   6  247.62    1.13   4
  -7   9   5   86.28    0.95   4
  -7  12  13    1.99    0.35   4
  -6   8   3    7.82    0.40   4
  -9   3  12  746.32    2.55   4
  -9   5   9    9.02    0.67   4
  -9   6  15    5.65    0.64   4
  -9   7  15    1.13    0.58   4
  -9   9  10   19.86    0.89   4
  -9   9  11   25.72    0.81   4
  -9   9  13   44.93    0.82   4
  -8   4  16   18.22    0.66   4
  -8   7   6   -0.54    0.51   4
  -8  10  15    2.48    0.42   4
  -8  11  13    8.08    0.47   4
  -7   6   4   12.89    0.50   4
  -7   7   4    6.18    0.53   4
  -7  12   8   17.72    0.66   4
  -6  -1   9  229.00    1.02   4
  -9   3  11   15.29    0.68   4
  -9   5  15    1.82    0.51   4
  -9   6   8   10.80    0.68   4
  -9   7   8   29.91    0.82   4
  -9   8  15   18.26    0.65   4
  -9   9   9   57.47    1.04   4
  -9   9  14   10.42    0.56   4
  -8   4   6  158.02    1.11   4
  -7   0   9   74.04    0.69   4
  -7   5   4    5.76    0.37   4
  -7   8   4   13.24    0.59   4
  -7  10   5    6.48    0.65   4
  -7  11   6    3.71    0.63   4
  -9   4  15   93.07    1.08   4
  -9  10  10    0.54    0.68   4
  -9  10  11  102.20    1.10   4
  -9  10  12    1.09    0.54   4
  -9  10  13    8.16    0.60   4
  -8   3  16    2.51    0.55   4
  -8   6  17   18.52    0.51   4
  -8   9   6    2.52    0.73   4
  -8  11   8   46.07    0.90   4
  -7   4   4   45.84    0.60   4
  -7  12   7    3.88    0.61   4
  -7  13  10    5.51    0.44   4
  -7  13  11   -0.27    0.36   4
 -10   5  12    9.96    0.86   4
 -10   6  13  113.52    1.19   4
 -10   7  12   -0.15    0.64   4
  -9   2  11   78.99    1.01   4
  -9   2  12  461.46    2.01   4
  -9   3   9   35.11    0.74   4
  -9   4   8   44.80    0.80   4
  -9   5  16    6.64    0.60   4
  -9   6   7  234.11    1.53   4
  -9   6  16    1.33    0.48   4
  -9   9   8  240.78    1.67   4
  -9   9  15    1.73    0.40   4
  -9  10  14    4.84    0.48   4
  -8   1   9  458.01    1.69   4
  -8   2   7  109.60    0.92   4
  -8   6   5   62.76    0.84   4
  -8   7   5    4.71    0.57   4
  -8  12  10  106.98    1.02   4
  -8  12  11   38.42    0.66   4
  -7   2   5 1431.15    2.56   4
  -6   3   3 1073.23    2.04   4
  -5   6   1  166.45    0.83   4
 -10   5  13   70.68    1.02   4
 -10   7  14   11.09    0.65   4
 -10   8  11    1.91    0.69   4
 -10   8  12    3.15    0.62   4
 -10   8  13    0.90    0.59   4
  -9   2  13  127.20    1.14   4
  -9   3  15   15.52    0.70   4
  -9   7   7    0.48    0.61   4
  -9   8   7   10.01    0.76   4
  -9   8  16    0.60    0.35   4
  -9  11  12   10.15    0.55   4
  -8   5   5  198.96    1.18   4
  -8   8   5   76.84    1.00   4
  -8  12   9   16.89    0.67   4
  -7   1   6  369.56    1.32   4
  -6   6   2   16.53    0.42   4
 -10   4  13    0.99    0.62   4
 -10   6  15    3.06    0.62   4
 -10   7  15    2.28    0.57   4
 -10   8  10    5.62    0.74   4
 -10   9  11   47.34    0.97   4
 -10   9  12   41.50    0.89   4
 -10   9  13    6.24    0.62   4
  -9   3   8  640.09    2.18   4
  -9   4   7  103.46    1.07   4
  -9   4  16   59.22    0.81   4
  -9  10  15   12.97    0.46   4
  -9  11  10   38.18    0.84   4
  -9  11  11   -0.28    0.48   4
  -9  11  13    1.29    0.42   4
  -8  11   7   47.03    0.84   4
  -7   0   7   25.87    0.49   4
  -7   3   4    9.85    0.38   4
  -6   8   2  111.42    0.84   4
 -10   4  10   34.78    0.85   4
 -10   4  14   21.62    0.74   4
 -10   5   9   89.22    1.12   4
 -10   5  15  125.69    1.13   4
 -10   6   9    1.61    0.70   4
  -7   6   3    4.67    0.37   4
  -1  -2  12   47.40    0.85   5
   0  -6  10   34.15    0.98   5
   0  -1  10    1.51    0.38   5
   1  -5   8  464.69    1.79   5
   1  -2   8  241.67    1.16   5
  -8  -8  17    0.05    0.25   5
  -6  -4  17   -0.39    0.48   5
  -1  -4  12   13.33    0.64   5
  -1   0  11  296.92    1.24   5
   0  -5  10    8.21    0.61   5
   0  -2  10  135.37    0.97   5
   1  -7   5    1.04    0.35   5
   1  -6   7   91.31    0.84   5
   0  -4  10   12.99    0.59   5
   0  -3  10    1.36    0.45   5
   1  -5   7   38.68    0.65   5
  -1  -1  11   15.91    0.54   5
   0  -7   8   14.87    0.65   5
   1  -4   7    3.04    0.46   5
   1  -2   7  759.02    1.82   5
  -5 -11  11    0.36    0.61   5
  -3  -4  14    0.71    0.62   5
  -1  -9   7   11.27    0.71   5
  -1  -7  10   47.21    0.93   5
  -1  -5  11    5.49    0.69   5
   0  -8   5   37.34    0.69   5
   1  -5   6   23.31    0.57   5
   1  -3   7    8.84    0.39   5
  -4 -10  11    0.01    0.69   5
  -1  -9   6   70.70    0.90   5
  -1  -2  11  224.65    1.26   5
   0   0   8 1072.89    2.04   5
  -2  -9   9  129.59    1.27   5
  -1  -6  10    0.71    0.55   5
   0  -3   9  410.26    1.47   5
   1  -5   5   54.24    0.53   5
   1  -4   6  276.83    1.16   5
   1  -3   6  425.55    1.26   5
   1  -2   6  222.48    0.95   5
  -2  -2  16    1.45    0.68   6
  -2   2  11   51.41    0.84   6
   1   3  10  282.08    1.79   6
   3   1  13   18.18    1.06   6
   5  -2  14   12.33    0.66   6
   5   3   8  130.87    1.41   6
   6   3   6    0.24    0.60   6
   8   2   6   22.73    0.93   6
  -3   2   9  174.31    1.10   6
  -1   0  15    4.91    0.88   6
  -1   3   8  144.71    1.05   6
  -1   3   9   16.32    0.67   6
   3   2  12    0.03    0.98   6
   5   1  12    1.21    0.95   6
   6   1  11    4.51    0.76   6
   7   1  10    6.41    0.79   6
  -3   2   8  337.22    1.39   6
   1   0  15    4.68    0.76   6
   1   1  14    4.98    0.87   6
   3  -1  15    0.11    0.68   6
   4  -2  15    2.82    0.54   6
   5   2  11    2.13    1.05   6
   6  -1  13    5.12    0.58   6
   6   2  10   46.74    1.12   6
   7   3   3    0.18    0.50   6
   7   3   4   15.81    0.61   6
   8  -1  11    1.64    0.55   6
  -3   2  11  128.37    1.21   6
  -2  -1  16    7.41    0.82   6
  -1  -3  17   -0.46    0.48   6
  -1  -1  16    1.64    0.63   6
  -1   2  13   52.86    1.20   6
   0   3  11    2.98    0.78   6
   1   2  13   54.93    1.18   6
   2   1  14   -0.22    0.85   6
   2   2  13   31.83    1.27   6
   2   4   6  521.15    2.06   6
   2   4   8    9.78    0.87   6
   4   0  14   21.53    0.85   6
   4   1  13    2.13    0.78   6
   7   2   9   24.18    0.92   6
   9   0   9   33.59    0.95   6
  -1   3  11    0.64    0.71   6
   0  -3  17    0.05    0.39   6
   0  -3  17   -0.11    0.23   6
   1   4   8    1.35    0.66   6
   2   4   5   89.67    0.94   6
   3   1  14   16.09    1.04   6
   3   4   8   70.80    1.14   6
   5   3  10   10.77    1.14   6
   5   4   6    5.22    0.82   6
   7   3   2   80.61    0.85   6
   8   2   8   27.35    1.14   6
  -2   3  10   40.09    0.80   6
   2  -1  16    3.34    0.63   6
   3   0  15   14.58    0.84   6
   3   4   9   45.03    1.12   6
   4   4   4  101.63    0.95   6
   5   1  13   23.36    1.01   6
   6   1  12   72.75    1.20   6
   7   1  11    1.87    0.75   6
   8   3   4    0.06    0.69   6
   8   3   5   55.26    1.09   6
   9   2   6   -0.34    0.84   6
  -2   3   7  708.85    2.02   6
   0   4   8  472.34    2.10   6
   0   4   9  126.48    1.25   6
   1   1  15    0.96    0.78   6
   4   4   9    0.32    0.87   6
   5   2  12   56.13    1.22   6
   7   3   8   89.95    1.36   6
 -18   0   6   -0.14    0.46   7
 -17  -2   6    1.66    0.88   7
 -14  -4   3    1.30    1.09   7
 -18   2   5   -0.87    0.38   7
 -18   1   6   -0.65    0.49   7
 -17  -1   5   -0.20    0.68   7
  -9  -6   6   -0.70    0.87   7
 -17  -2  10    0.03    0.77   7
 -16  -3  10    1.24    0.95   7
 -18   0   8    0.98    0.58   7
 -11  -5   3    0.29    0.91   7
 -18   0  10    0.18    0.27   7
 -18   1   7    0.35    0.49   7
 -18   2   6   -0.34    0.35   7
 -18   2   6    0.29    0.24   7
 -17   0   5   15.01    0.82   7
 -17   1  14    1.93    0.33   7
 -16  -1   4    0.16    0.92   7
 -15   1   1    0.89    0.74   7
 -14  -3   3    2.64    1.07   7
 -18   3   6   -0.17    0.37   7
 -17  -1   7   -0.30    0.73   7
 -14  -4   9    1.44    1.18   7
 -18   1   8   -0.31    0.41   7
 -18   1   8    0.16    0.27   7
 -18   1  11    8.86    0.50   7
 -18   2   7    0.73    0.46   7
 -18   4   6    0.32    0.26   7
 -18   2  12    5.44    0.39   7
 -17   1   5    0.36    0.60   7
 -17   2  14    0.14    0.34   7
 -16  -1   5   64.26    1.24   7
 -14  -2  13    0.04    0.66   7
 -18   2   8    1.34    0.45   7
 -18   3   7    2.04    0.38   7
 -16  -1  12    4.40    0.78   7
 -16   0   4  111.51    1.43   7
 -14  -2   3    2.11    0.99   7
 -13  -4   7   14.13    1.25   7
  -9  -4   1  342.80    2.04   7
 -18   4   7   -0.28    0.35   7
 -17   0  11   14.87    0.76   7
 -17   1   6   21.49    0.88   7
 -16  -1   6    0.84    0.88   7
 -16   2   3    1.07    0.72   7
 -11  -4  10    1.96    0.82   7
 -16  -1  11   17.62    0.91   7
 -15  -2  11    2.55    0.79   7
 -14  -3   9   83.45    1.54   7
 -14  -3  10   57.17    1.22   7
 -13  -3   4   19.95    1.07   7
 -13  -3  11    2.48    0.89   7
 -12  -1   0    1.12    0.86   7
  -9  -3   0  140.31    1.37   7
 -18   3  10    3.11    0.43   7
 -18   3  11    1.10    0.36   7
 -18   5   8    0.64    0.30   7
 -17   1   7   -0.21    0.79   7
 -17   1  12   16.89    0.65   7
 -17   3   5    1.14    0.60   7
 -16  -1   8    0.69    1.00   7
 -16   1   4    0.94    0.70   7
 -16   3   3    2.08    0.66   7
 -12  -4   6   44.51    1.19   7
 -11  -4   4    1.12    0.75   7
 -11  -4   9   73.98    1.27   7
  -9  -4   2    9.71    0.62   7
 -18   4   9    0.29    0.37   7
 -17   2  13   25.26    0.57   7
 -17   4   5    3.28    0.53   7
 -17   6   5    2.88    0.31   7
 -16  -1   9    6.52    0.88   7
 -15   2   2   13.35    0.87   7
 -14  -1   3   45.67    1.31   7
 -14   0   2    2.55    0.96   7
 -13  -3   5   97.00    1.48   7
 -13  -2   3   11.58    1.12   7
 -11  -4   5  128.86    1.48   7
 -11  -4   8    1.93    0.87   7
 -11  -3   2   13.51    0.80   7
 -10  -4   9    0.90    0.68   7
  -9  -2  -1  237.50    1.57   7
 -18   4  10   13.10    0.45   7
 -18   5   9    0.82    0.31   7
 -18   5  10   -0.15    0.29   7
 -17   1   8    8.66    0.75   7
 -17   1  10    6.00    0.72   7
 -17   1  11    0.19    0.57   7
 -17   5   5    0.86    0.40   7
 -16   0   6   92.52    1.34   7
 -16   2   4   62.08    1.13   7
 -15  -1  12    2.83    0.72   7
 -14  -1  13   64.28    1.05   7
 -13  -3   9   40.09    1.24   7
 -12  -3   4    6.36    0.99   7
 -12  -2   2  202.50    1.82   7
 -11  -4   6    4.87    0.78   7
 -11  -3  11   70.08    1.09   7
 -10  -1  -1  101.55    1.18   7
 -17   2  12    3.52    0.54   7
 -17   3   6    8.42    0.68   7
 -15  -1   6   42.95    1.16   7
 -15   3   2   32.18    0.89   7
 -13  -3   8   87.40    1.38   7
 -13  -1   2   30.64    1.00   7
 -13   0   1  128.83    1.43   7
 -12  -3  10    9.98    0.94   7
 -12   0   0   26.84    0.97   7
 -11  -1   0   55.78    1.05   7
 -11   0  -1    2.65    0.60   7
 -10  -4   5  140.75    1.38   7
 -10  -4   6  162.85    1.51   7
 -10  -4   7   34.96    0.99   7
 -10  -4   8  207.91    1.59   7
  -9  -4   4   17.97    0.75   7
  -9  -4   8   51.55    0.86   7
  -9  -3   1  251.25    1.61   7
 -16   0  10    6.37    0.91   7
 -16   3   4   16.81    0.84   7
 -15  -1  11   51.52    1.09   7
 -14  -2   7    7.31    1.10   7
 -13  -2   4  132.45    1.56   7
 -13   2   0    0.78    0.69   7
  -9  -4   5  190.52    1.48   7
  -9  -4   7  110.32    1.12   7
 -17   2   9   11.11    0.78   7
 -17   2  10    0.03    0.64   7
 -17   2  11    2.79    0.55   7
 -17   4   6    8.09    0.54   7
 -17   5   6    1.55    0.48   7
 -16   1   6    1.41    0.80   7
 -15   4   2    6.76    0.68   7
 -14  -2   8  102.86    1.47   7
 -13  -2  11   84.80    1.20   7
 -12  -3   9    5.16    0.82   7
 -12  -2   3    0.97    0.93   7
 -17   5  13    9.91    0.35   7
 -16   1   7   33.60    1.11   7
 -16   2  13   17.46    0.67   7
 -16   4   4    3.45    0.68   7
 -14  -1   5   23.84    1.03   7
 -13  -2   5    8.25    0.92   7
 -13  -1   3    2.36    0.86   7
 -12  -3   8   16.33    0.91   7
 -10  -3   3   14.76    0.66   7
 -10  -2   1   22.34    0.73   7
  -9  -3   2    9.84    0.52   7
  -9  -1  -1   38.91    0.77   7
 -17   3   8    2.93    0.61   7
 -17   4   7   11.31    0.59   7
 -16   1  11   18.15    0.78   7
 -16   7   4    0.60    0.33   7
 -14  -1  11    3.52    0.87   7
 -12  -2  11  241.07    1.76   7
 -12  -1   2   89.90    1.33   7
 -11  -3   5    1.62    0.67   7
 -11   1  -1   16.59    0.75   7
 -17   3  10   34.42    0.75   7
 -17   5   7    0.39    0.49   7
 -17   6   7    4.57    0.43   7
 -17   7   7    2.63    0.31   7
 -16   1   8    0.87    0.81   7
 -16   1   9    6.51    0.82   7
 -16   1  10    1.73    0.70   7
 -16   3   5    2.62    0.62   7
 -15   0   7    7.18    1.10   7
 -15   0  11   15.22    0.84   7
 -14  -1  10    9.85    1.03   7
 -14   0   4  110.85    1.43   7
 -13  -2   7    3.71    0.86   7
 -13  -2   8    8.33    0.89   7
 -13  -1   4   91.82    1.42   7
 -12  -2   4  158.68    1.56   7
 -11  -3   7    1.90    0.65   7
 -10  -3   4    1.53    0.57   7
 -10  -1   0    0.35    0.52   7
 -17   4  10    3.06    0.57   7
 -17   4  11    8.74    0.49   7
 -17   6  12    1.20    0.27   7
 -16   2   7    5.85    0.91   7
 -16   2  12   14.02    0.65   7
 -16   5  14    0.14    0.30   7
 -14  -1   7   48.81    1.18   7
 -14  -1   9    9.24    1.03   7
 -14   1   3   40.58    1.06   7
 -11  -2   3   69.34    1.06   7
 -10  -3   5   28.20    0.82   7
 -10  -3   8    1.03    0.65   7
 -10  -2   2    8.97    0.67   7
  -9  -3   9   37.29    0.71   7
 -17   5   8    3.47    0.48   7
 -17   5  11   20.37    0.56   7
 -17   6   8    0.78    0.39   7
 -17   7  11    5.65    0.31   7
 -16   3   6    3.87    0.83   7
 -16   4   5    0.14    0.60   7
 -16   6  14    0.53    0.24   7
 -16   8   5   -0.26    0.28   7
 -15   1  12    2.13    0.77   7
 -15   4   3    7.73    0.78   7
 -13  -1  11   15.52    1.00   7
 -13   2   1   83.93    1.15   7
 -12  -1  12   24.89    0.89   7
  -9  -3   8  600.39    2.28   7
 -17   6   9    7.39    0.45   7
 -17   6  10    0.97    0.41   7
 -17   7   9    0.21    0.28   7
 -16   2   8   47.94    1.05   7
 -16   2   9    2.72    0.75   7
 -16   4  13    8.30    0.54   7
 -16   5   5    2.55    0.66   7
 -16   7   5   20.60    0.55   7
 -15   5   3    0.37    0.63   7
 -14   1  13   62.47    1.03   7
 -14   2  14   49.70    0.84   7
 -13  -1   5    0.06    0.80   7
 -13   1   2   30.37    0.93   7
 -12  -2   6  123.69    1.42   7
 -12  -2   7  159.61    1.54   7
 -12   2   0   70.61    1.08   7
 -11  -2   4   10.30    0.68   7
 -11  -1   2   34.24    0.94   7
 -16   4   6   21.67    0.88   7
 -16   6   5    9.65    0.55   7
 -15   1  11   51.87    1.05   7
 -15   6   3    7.22    0.63   7
 -15   7   3    6.28    0.50   7
 -14   0   6    4.02    0.87   7
 -14   2   3    2.50    0.75   7
 -13  -1   6   24.87    0.96   7
 -13  -1  10  178.04    1.60   7
 -12   0   2    6.57    0.75   7
 -10  -1   1   26.42    0.69   7
 -16   3   8   25.60    0.97   7
 -16   3  11    6.47    0.67   7
 -15   1   8   25.69    1.00   7
 -15   4  14    0.65    0.50   7
 -13  -1   7    1.75    0.81   7
 -13  -1   8   65.30    1.19   7
 -13  -1   9    0.58    0.77   7
 -13   3   1   -0.48    0.58   7
 -11  -2   5   22.91    0.78   7
 -11  -2   9   32.64    0.81   7
 -11   1   0   54.56    0.89   7
 -16   3   9   11.83    0.78   7
 -16   3  10    1.93    0.66   7
 -16   4   7   21.06    0.88   7
 -16   4  12   17.54    0.59   7
 -16   5   6   19.52    0.71   7
 -16   7  13    4.87    0.32   7
 -16   9   7    3.72    0.30   7
 -15   2  12   78.18    1.06   7
 -15   3  13    0.71    0.66   7
 -15   9   4    1.17    0.31   7
 -14   1   5   23.33    1.01   7
 -13   2   2   95.66    1.36   7
 -12   3   0    1.93    0.70   7
 -11  -2   6    1.20    0.61   7
 -11  -2   7   10.30    0.66   7
 -11  -1   3    1.81    0.69   7
 -10  -2   4  402.05    1.96   7
 -16   5  12   20.34    0.62   7
 -16   6   6    7.49    0.56   7
 -16   7   6   22.86    0.59   7
 -15   2  11    2.15    0.83   7
 -15   5   4    3.26    0.75   7
 -14   3  14   19.67    0.68   7
 -13   0   5    4.74    0.81   7
 -11  -1  11  445.34    2.12   7
 -10  -2   9   -0.05    0.50   7
 -10  -1   2  165.24    1.34   7
 -16   4   9    0.84    0.65   7
 -16   4  10    4.02    0.65   7
 -16   5   7   45.52    0.88   7
 -16   8  12    2.14    0.26   7
 -15   6  14    7.12    0.40   7
 -15   8   4    4.64    0.49   7
 -14   1  11    3.93    0.77   7
 -14   7   2    3.94    0.55   7
 -12  -1   6   10.92    0.77   7
 -12  -1   7    6.13    0.87   7
 -12   0  12 1012.61    3.11   7
 -12   1   2   85.90    1.22   7
 -10  -2   5  325.13    1.77   7
 -10  -2   6   71.34    0.97   7
 -16   5   8    0.69    0.64   7
 -16   5  11   95.67    0.99   7
 -16   6   7   25.72    0.69   7
 -16   6  12    2.65    0.35   7
 -16   7  12    1.28    0.31   7
 -16   9   9    2.76    0.30   7
 -16   9  10    0.41    0.27   7
 -15   3  12   58.44    0.95   7
 -15   4   5   38.03    0.96   7
 -15   7   4   17.66    0.60   7
 -15   7  14    0.33    0.29   7
 -13   0   7   44.07    1.16   7
 -13   3   2  142.27    1.47   7
 -12  -1   8    5.33    0.71   7
 -11  -1   4   52.28    0.91   7
 -11  -1  10   23.06    0.80   7
 -10  -2   7  218.79    1.48   7
 -16   6  11   -0.28    0.52   7
 -16   7   8   14.04    0.61   7
 -16   7  11   13.35    0.51   7
 -16   8   8   21.49    0.53   7
 -16   8  11    0.57    0.33   7
 -15   9   5   11.09    0.45   7
 -14   1   9   11.08    0.88   7
 -14   2   5   10.17    0.85   7
 -14   3   4   82.40    1.21   7
 -14   4  14    4.90    0.56   7
 -13   0   9    9.10    0.89   7
 -10   1   0    0.31    0.44   7
 -16   6   9    0.04    0.51   7
 -16   8   9    0.22    0.35   7
 -16   8  10    8.69    0.40   7
 -15   4  12   25.20    0.83   7
 -15   5  13    3.73    0.51   7
 -15  10   6    2.09    0.30   7
 -14   2   6   79.15    1.39   7
 -14   9   3   14.73    0.52   7
 -13   1   5    0.63    0.88   7
 -12   3   1  107.16    1.25   7
 -15   6   5   17.86    0.72   7
 -15   6  13    3.98    0.53   7
 -15   7   5    4.04    0.68   7
 -15   8   5    3.73    0.55   7
 -13   4   2    2.12    0.78   7
 -12   0  10   99.30    1.29   7
 -12   2   2  207.56    1.64   7
 -11   0   3  636.94    2.51   7
 -10  -1   4   88.28    1.03   7
 -15   4  11  101.50    1.14   7
 -15   5   6   24.51    0.84   7
 -15   5  12    1.61    0.65   7
 -15   7  13    1.26    0.41   7
 -15   8  13    7.21    0.32   7
 -14   2   7    8.61    0.91   7
 -14   2   8  103.73    1.48   7
 -14   2   9   10.27    1.01   7
 -14   3   5   26.43    0.98   7
 -14   7   3    5.50    0.65   7
 -14   8   3   10.35    0.60   7
 -13   1   6   23.92    0.92   7
 -13   3   3   50.95    1.10   7
 -11   0  11  402.77    2.01   7
 -11   1   2   32.54    0.86   7
 -11   3   0    5.26    0.55   7
 -10  -1   9    3.61    0.58   7
 -10   0   2   35.41    0.70   7
 -15   4   9  138.12    1.40   7
 -15   5   7    2.24    0.84   7
 -15   6   6    0.71    0.75   7
 -15   9   6    2.82    0.42   7
 -15  10   7   14.40    0.43   7
 -14   3   6    1.24    0.91   7
 -14   4  13    2.84    0.61   7
 -14   6  14    3.26    0.46   7
 -13   1   7    1.78    0.78   7
 -13   1   8   64.45    1.23   7
 -13   2  12    2.62    0.69   7
 -13   4  14    1.33    0.59   7
 -12   0   8    5.94    0.71   7
 -10  -1   5   76.25    0.92   7
 -15   5  11    4.31    0.63   7
 -15   7   6    1.77    0.58   7
 -15   7  12   13.46    0.56   7
 -15   8   6    8.90    0.52   7
 -15   8  12    1.63    0.40   7
 -15   9  12    4.41    0.26   7
 -15  10   8    1.95    0.34   7
 -15  10  11    3.00    0.22   7
 -14   4   5   26.97    1.05   7
 -14   7  14    0.75    0.38   7
 -14   8  14    1.74    0.32   7
 -13   2   5    6.62    0.80   7
 -10  -1   7   94.01    1.01   7
 -15   6   7   52.70    0.96   7
 -15   9   7   -0.03    0.39   7
 -15   9  11   -0.02    0.36   7
 -15  10   9    7.59    0.38   7
 -15  10  10    0.04    0.30   7
 -14   3  10   54.09    1.17   7
 -14   4  12    6.53    0.77   7
 -14   5  13   15.61    0.71   7
 -13   2  11   82.48    1.15   7
 -13   4   3    5.19    0.76   7
 -12   1   5    3.83    0.69   7
 -12   3   2   21.39    0.81   7
 -11   0   5  245.32    1.61   7
 -11   1   3    1.97    0.61   7
  -9  -1   9   46.78    0.70   7
 -15   6   8   -0.31    0.66   7
 -15   6  10   13.50    0.77   7
 -15   7  11    3.29    0.58   7
 -15   8  11    4.43    0.49   7
 -15   9   8    6.04    0.50   7
 -15   9  10    6.39    0.46   7
 -14   3   9   82.04    1.22   7
 -14   4   6   96.84    1.28   7
 -14   5   5    4.88    0.92   7
 -14   7   4   28.83    0.79   7
 -14   8   4   38.68    0.84   7
 -13   2  10  136.05    1.51   7
 -13   7   2   10.19    0.61   7
 -13   8   2    0.52    0.48   7
 -12   1   6   10.95    0.84   7
 -12   1  10   66.85    1.13   7
 -12   5   1    3.05    0.58   7
 -11   0   7  109.63    1.20   7
 -11   0   9    4.03    0.60   7
 -15   7   8   10.45    0.66   7
 -15   7   9    8.29    0.70   7
 -15   7  10   10.02    0.62   7
 -15   8   8   12.38    0.57   7
 -15   8   9    2.25    0.57   7
 -14   9  13   14.20    0.43   7
 -14  10   5    0.74    0.44   7
 -13   2   8    8.56    0.82   7
 -13   2   9   23.76    0.91   7
 -13   5   3   85.60    1.22   7
 -12   1   8    4.35    0.81   7
 -12   1   9   17.75    0.81   7
 -12   6   1  110.62    1.19   7
 -11   2   2   26.51    0.72   7
 -10   0   4  200.24    1.35   7
 -14   4   9   -0.24    0.92   7
 -14   5   6    2.66    0.89   7
 -14   7  13    3.06    0.47   7
 -14   8  13    0.19    0.42   7
 -14   9   5   23.16    0.72   7
 -13   6  14    0.85    0.46   7
 -12   4   2   40.33    0.92   7
 -11   1  11  430.26    2.02   7
 -10   2   1   20.05    0.67   7
 -10   3   0   62.19    0.82   7
 -14   6  12    7.30    0.72   7
 -14   7   5    2.50    0.68   7
 -14  10  12    4.40    0.34   7
 -14  11   7    6.90    0.40   7
 -14  11  11   12.23    0.34   7
 -13   3  11    2.20    0.69   7
 -13   6   3   28.51    0.83   7
 -13   7  14    5.09    0.49   7
 -13   8  14    2.37    0.40   7
 -13   9  14    4.37    0.35   7
 -14   5   7   52.07    1.09   7
 -14   7  12   12.56    0.67   7
 -14   9  12    2.03    0.42   7
 -14  10   6   19.71    0.56   7
 -14  11   8    1.69    0.36   7
 -14  11  10    0.71    0.32   7
 -13   3   7   24.85    0.92   7
 -13   3  10  117.40    1.31   7
 -13   4   5    8.06    0.91   7
 -13   5   4    9.88    0.88   7
 -13   9   3    2.66    0.51   7
 -13  11   4    2.70    0.42   7
 -13  12   5    0.45    0.31   7
 -12   5  14   13.00    0.53   7
 -11   1  10   24.90    0.76   7
 -11   2   3   71.73    0.97   7
 -10   1   3   55.03    0.84   7
 -14   6  11    2.55    0.64   7
 -14   7   6    0.10    0.70   7
 -14   8   6    3.30    0.72   7
 -14   8  12   24.05    0.59   7
 -14   9   6    0.91    0.51   7
 -14  10  11    3.65    0.41   7
 -14  11   9   11.30    0.40   7
 -12   2   6  119.78    1.29   7
 -12   2   7  159.51    1.52   7
 -11   1   6   23.35    0.71   7
 -11   3   2   13.76    0.67   7
 -14   7   7    4.75    0.86   7
 -14  10   8    7.42    0.56   7
 -14  10  10    0.95    0.45   7
 -13   4  11   22.13    0.86   7
 -13   6  13   25.08    0.70   7
 -13  10   4    5.60    0.58   7
 -12   2   8   98.03    1.24   7
 -12  10  14    0.95    0.29   7
 -11   1   7  127.40    1.21   7
 -10   4   0  115.58    1.04   7
 -14   7   8   56.70    1.09   7
 -14   8   7    1.61    0.64   7
 -14   8  11   -0.24    0.51   7
 -14   9   8    8.10    0.69   7
 -14   9  10    1.13    0.58   7
 -14  10   9   27.61    0.60   7
 -13   4  10   18.94    0.84   7
 -13   7  13   19.89    0.63   7
 -13   9   4   30.67    0.83   7
 -13   9  13    4.91    0.48   7
 -13  11   5    1.32    0.48   7
 -13  11  12    4.02    0.31   7
 -13  12   6   -0.21    0.31   7
 -13  12  11    2.00    0.22   7
 -13  12  11    0.53    0.13   7
 -12   7   2   76.24    1.11   7
 -12   7  14    4.36    0.53   7
 -10   1   4   87.99    0.95   7
 -10   3   1  119.54    1.07   7
 -14   8   9   12.51    0.69   7
 -14   9   9    6.23    0.56   7
 -13   4   8    1.81    0.83   7
 -13   4   9   42.69    1.03   7
 -13   5  11    0.54    0.86   7
 -13   6   5    4.15    0.92   7
 -13   6  12    1.48    0.75   7
 -13   8   4    3.17    0.69   7
 -12   3  10    9.52    0.88   7
 -12   4   4   31.30    0.86   7
 -12   5   3  152.86    1.43   7
 -12   8  14   30.43    0.64   7
 -12   9   2   14.87    0.62   7
 -11   2   5   22.46    0.80   7
 -11   3   3   26.54    0.75   7
 -11   3  12   63.12    1.01   7
 -10   1   5   87.37    1.01   7
 -13   5  10   10.64    0.92   7
 -13  10   5   65.02    0.97   7
 -13  12   8    2.69    0.38   7
 -12   3   9    6.13    0.87   7
 -12  11   3   12.21    0.58   7
 -12  11  13    9.30    0.36   7
 -12  13   5    5.19    0.34   7
 -11   2  10    4.44    0.63   7
 -11  11  14    3.89    0.26   7
 -10   1   6  131.68    1.16   7
 -13   5   9   44.85    1.01   7
 -13   6   6    5.10    0.90   7
 -13   7   5    2.45    0.78   7
 -13   7  12   22.53    0.72   7
 -13   8  12    2.87    0.64   7
 -13   9   5   -0.44    0.71   7
 -13   9  12   16.04    0.63   7
 -13  11   6   30.93    0.63   7
 -13  11  11    1.08    0.36   7
 -12   6   3   75.14    1.12   7
 -12  12   4   16.41    0.53   7
 -12  12  12    2.73    0.27   7
 -11   2   6    1.63    0.57   7
 -11   2   7   10.69    0.73   7
 -11   2   8    3.23    0.70   7
 -11   2   9   32.00    0.78   7
 -11   3   4  101.39    1.15   7
 -11   6  14    4.49    0.53   7
 -11   7   1  252.62    1.65   7
 -10   2  11   80.48    1.02   7
 -10   4   1   42.85    0.80   7
 -13   6   7   28.92    1.08   7
 -13   6  10   20.48    0.94   7
 -13   7   6    7.33    0.93   7
 -13  10   6   11.57    0.70   7
 -13  11   7    2.92    0.54   7
 -13  11  10    2.65    0.44   7
 -12   5   4   20.09    0.85   7
 -12  13   6    4.01    0.37   7
 -11   3  11   64.62    0.99   7
 -11   7  14   58.36    0.81   7
 -11   8   1   84.96    1.09   7
 -11  10  14    0.42    0.32   7
 -13   6   8   73.14    1.16   7
 -13   6   9  138.25    1.42   7
 -13   7  11    1.54    0.65   7
 -13   9   6   11.49    0.81   7
 -13   9  11    2.10    0.62   7
 -13  11   8    2.15    0.48   7
 -13  11   9    3.10    0.46   7
 -12   4  10    5.42    0.72   7
 -12   7  13   14.10    0.64   7
 -12   9  13   69.40    0.84   7
 -12  10  13    0.31    0.37   7
 -12  13  10    5.51    0.30   7
 -11   3   5    0.09    0.69   7
 -11   4  12    8.43    0.71   7
 -11   9  14    3.59    0.43   7
 -11  12  13    2.82    0.26   7
 -10   2   4  410.18    1.85   7
 -10   2  10   53.65    0.90   7
 -10   3  12   25.23    0.65   7
  -9   1   9   46.55    0.77   7
 -13   8  10    4.39    0.77   7
 -13   9   7    1.36    0.76   7
 -13  10   8   13.58    0.72   7
 -13  10   9    7.94    0.67   7
 -12   4   8    4.40    0.75   7
 -12  11   4    0.43    0.49   7
 -12  12   5    9.96    0.55   7
 -12  12  11    8.85    0.40   7
 -12  13   8    3.29    0.36   7
 -11   3  10   43.40    0.89   7
 -11   6   2   10.39    0.79   7
 -11  11   2   49.71    0.81   7
 -11  14   5    4.79    0.27   7
 -10  11  14    0.29    0.29   7
 -13   8   9    5.12    0.73   7
 -13   9   9    4.25    0.74   7
 -13   9  10    3.21    0.60   7
 -12   5  10   13.68    0.88   7
 -12   7   4   19.89    0.82   7
 -12  10   4   16.87    0.83   7
 -11   3   6  156.01    1.34   7
 -11   5   3    0.41    0.72   7
 -10   2   9    0.63    0.51   7
 -10   3   3   15.06    0.58   7
 -10   4   2   59.65    0.91   7
 -10   5   1  125.84    1.13   7
 -12   5   9    3.63    0.89   7
 -12   6   5   60.42    1.08   7
 -12   6  11    2.32    0.83   7
 -12   8   4   81.17    1.12   7
 -12  10  12    4.20    0.46   7
 -12  11   5   27.69    0.78   7
 -12  12   6   24.27    0.59   7
 -12  12  10    2.28    0.44   7
 -11   4  11    6.68    0.70   7
 -11   5  12    5.45    0.76   7
 -11   7   2  127.58    1.26   7
 -11  11  13   -0.25    0.37   7
 -11  12   3   14.29    0.60   7
 -11  14   6   12.54    0.36   7
 -10   2   6   74.68    0.90   7
 -10   5  13   71.00    0.98   7
 -12   7   5   49.70    1.11   7
 -12   9  12   18.07    0.62   7
 -12  11  11    3.20    0.45   7
 -12  12   9    1.91    0.48   7
 -11   4   5  130.30    1.27   7
 -11   4  10    1.60    0.75   7
 -11   9   2   67.29    0.98   7
 -11  13  11    0.42    0.29   7
 -11  14   8    4.32    0.32   7
 -10   4  12   10.74    0.63   7
 -10   6   1   16.43    0.72   7
  -9   2  10  166.73    1.21   7
  -9   5   0   49.43    0.73   7
 -12   6   9    1.92    0.83   7
 -12   8   5   11.38    0.83   7
 -12  10   5    0.91    0.64   7
 -12  11   6    2.91    0.67   7
 -11   4   6    4.78    0.65   7
 -11   6  12    7.99    0.77   7
 -11   8  13    6.34    0.65   7
 -11   9  13    5.23    0.59   7
 -11  11   3    6.59    0.68   7
 -11  13   5    5.40    0.51   7
 -10   3  10   29.59    0.74   7
 -10   4   3   45.08    0.84   7
 -10   5   2   13.70    0.67   7
 -10  12  13    0.17    0.28   7
 -10  15   6    2.85    0.27   7
  -9   4   1  348.06    1.62   7
 -12   7   6   62.89    1.10   7
 -12   9  11   44.23    0.82   7
 -12  10   6   22.95    0.89   7
 -12  11   7    9.22    0.69   7
 -12  11   9    8.55    0.65   7
 -11   4   8    2.45    0.65   7
 -11   4   9   70.40    1.03   7
 -11   5  11    6.66    0.70   7
 -11  12   4    1.36    0.61   7
 -11  13  10   25.10    0.52   7
 -10   6  13  115.06    1.15   7
 -10  13  12    6.78    0.33   7
 -10  15   7   35.84    0.43   7
 -10  15   7   10.98    0.24   7
  -9   3  11   13.33    0.64   7
 -12   7   7   95.57    1.25   7
 -12   7   8    1.08    0.74   7
 -12   9  10    1.40    0.75   7
 -12  10   7   12.39    0.81   7
 -12  10  10    3.41    0.59   7
 -12  11   8    1.77    0.56   7
 -11   5   5   22.87    0.79   7
 -11   6   4   49.29    0.97   7
 -11   7  12    7.31    0.79   7
 -11   9   3    2.14    0.83   7
 -11  11  12   43.02    0.65   7
 -11  12  11   35.78    0.64   7
 -11  13   6   28.48    0.65   7
 -10   3   8    1.58    0.61   7
 -10   4  11    2.78    0.56   7
 -10   9   1   34.29    0.87   7
 -10  14   4   23.68    0.49   7
  -9   2   8   58.22    0.82   7
 -12   8   7   -0.11    0.77   7
 -12   8   8   23.78    0.91   7
 -12   8   9    1.33    0.75   7
 -12  10   8    2.15    0.66   7
 -12  10   9   22.00    0.75   7
 -11  10  12   14.13    0.65   7
 -11  11   4   29.11    0.87   7
 -11  13   7   -0.01    0.48   7
 -11  13   8   23.62    0.61   7
 -10   6   2   72.69    0.96   7
 -10  11  13   58.85    0.68   7
 -10  14  10    5.41    0.32   7
  -9   5   1   36.27    0.70   7
 -11   5   8  158.91    1.42   7
 -11   7   4  216.83    1.63   7
 -11   9  12   49.09    0.83   7
 -11  12   5   22.61    0.67   7
 -11  12  10    1.81    0.52   7
 -10   9  13    7.01    0.60   7
 -10  11   2    1.47    0.63   7
 -10  14   5    5.40    0.47   7
  -9   3  10   30.10    0.74   7
  -9   7   0   13.39    0.56   7
  -9  12  13   51.75    0.61   7
 -11   6   6    7.59    0.87   7
 -11   6  10    0.02    0.65   7
 -11   7  11    5.28    0.68   7
 -11   8   4  197.88    1.61   7
 -11   9   4   97.56    1.22   7
 -11  11   5    1.46    0.73   7
 -11  12   6    2.05    0.65   7
 -10   4   9    0.09    0.64   7
 -10   7   2   22.10    0.72   7
 -11   6   7  191.22    1.56   7
 -11   6   9    5.27    0.72   7
 -11   7  10   28.32    0.98   7
 -11   8  11   43.01    0.93   7
 -11   9  11   12.41    0.72   7
 -11  11  10    4.54    0.66   7
 -11  12   7   32.44    0.74   7
 -11  12   9   24.06    0.66   7
 -10   4   8  200.26    1.43   7
 -10   6   3   12.32    0.77   7
 -10  12   3    0.81    0.63   7
 -10  13   4    0.55    0.47   7
 -10  14   7    4.77    0.45   7
  -9   5  12    5.85    0.63   7
  -9   6   1  118.20    1.11   7
  -9  13  12   13.34    0.42   7
  -9  15   5    0.40    0.35   7
 -11   7   6   91.40    1.21   7
 -11   7   9    3.46    0.87   7
 -11   8  10    8.56    0.86   7
 -11   9   5   16.90    0.85   7
 -11  10  10    3.43    0.73   7
 -11  11   9   22.36    0.81   7
 -10  11  12    6.87    0.49   7
  -9   3   8  619.75    2.23   7
  -9   4   3    6.51    0.46   7
  -9  11  13    0.64    0.44   7
  -9  13   2   63.92    0.88   7
  -9  15   8    2.64    0.33   7
  -8  16   5    1.43    0.25   7
  -7  13  13    1.38    0.27   7
 -11   7   7   22.60    0.85   7
 -11   7   8   88.29    1.18   7
 -11   8   9   83.58    1.25   7
 -11   9   6   20.28    0.94   7
 -11  11   7   20.32    0.78   7
 -11  11   8   14.71    0.73   7
 -10   5   5  253.29    1.60   7
 -10   6  11    1.06    0.66   7
 -10   7   3   61.68    0.98   7
 -10   8  12    3.92    0.64   7
 -10  10  12   97.16    1.00   7
 -10  12  11    0.53    0.44   7
 -10  13   5   14.06    0.60   7
  -9   4  10    9.20    0.63   7
  -9   9  13   42.49    0.79   7
  -9  10  13    7.50    0.58   7
  -9  15   6    1.35    0.27   7
  -9  15   7    1.07    0.30   7
  -8  12  13    2.98    0.37   7
  -8  16   6    1.36    0.26   7
  -8  16   7    0.01    0.20   7
 -11   8   7    6.77    0.76   7
 -11   9   8    2.60    0.72   7
 -11   9   9   22.07    0.82   7
 -10   8   3    0.95    0.71   7
 -10   9   3  102.88    1.32   7
 -10  13   6   -0.27    0.60   7
 -10  13   9    4.86    0.50   7
  -9   8   1  152.80    1.32   7
  -9  10   1   21.44    0.78   7
  -9  12  12   19.38    0.58   7
  -9  14   4    0.86    0.51   7
  -8  15   3    4.35    0.41   7
  -8  15  10    1.34    0.25   7
  -7  14  12    5.52    0.27   7
 -10   6  10   50.77    0.94   7
 -10   8  11    1.07    0.76   7
 -10  13   7   18.87    0.63   7
 -10  13   8    2.09    0.51   7
  -9  12   2   -1.01    0.64   7
  -9  13  11   42.36    0.63   7
  -8  13  12    4.35    0.40   7
  -8  14  11    0.38    0.31   7
  -7  16   3    5.31    0.32   7
 -10   6   6  106.77    1.26   7
 -10   6   9    2.80    0.67   7
 -10   7  10    7.64    0.82   7
 -10  10   4   65.71    1.14   7
 -10  10  11    8.49    0.66   7
 -10  12   9    1.21    0.66   7
  -9   4   5  197.93    1.31   7
  -9   7  12    3.94    0.60   7
  -9  11  12   11.90    0.65   7
  -9  13   3    4.05    0.55   7
  -8   7   0  280.96    1.52   7
  -8  11  13    8.32    0.48   7
  -8  15   9   19.14    0.45   7
  -7  12  13    1.94    0.37   7
 -10   6   8   21.61    0.76   7
 -10   9   4  224.70    1.67   7
 -10  11  10    5.21    0.63   7
 -10  12   6   84.14    1.07   7
 -10  12   8   38.60    0.83   7
  -9   4   6  127.84    1.10   7
  -9   5   4   23.69    0.66   7
  -9   5  10   74.51    0.95   7
  -9   7   2  149.58    1.25   7
  -9   8  12    4.73    0.70   7
  -9  14   8    0.41    0.50   7
  -8   8  13   11.48    0.52   7
  -8  10  13   23.16    0.67   7
  -7  16   8    2.14    0.28   7
  -6  14  12    9.58    0.34   7
 -10   7   8  126.25    1.37   7
 -10   9  10   18.86    0.77   7
 -10  10   5   12.71    0.89   7
 -10  11   9   23.16    0.80   7
  -9   6   3  189.53    1.35   7
  -9  12  11   11.94    0.56   7
  -9  13   4   48.08    0.91   7
  -8   4  10   45.33    0.72   7
  -8   6  12    5.74    0.51   7
  -8  10   0   55.63    0.90   7
  -8  12  12   42.78    0.72   7
  -8  15   5    2.58    0.45   7
  -8  15   8    2.67    0.41   7
  -7  15  10   11.47    0.37   7
  -7  16   4    0.26    0.31   7
 -10   7   7  129.98    1.32   7
 -10   8   6   81.05    1.17   7
 -10   8   8   45.10    1.05   7
 -10   9   6    4.87    0.85   7
 -10   9   9  139.83    1.37   7
 -10  10   6   39.58    1.03   7
 -10  10   9    0.16    0.72   7
  -9   5   5    5.51    0.50   7
  -9   5   9    9.52    0.59   7
  -9   7  11   18.38    0.75   7
  -9  11  11   -0.16    0.65   7
  -9  13   9    1.14    0.61   7
  -8   6   1   19.89    0.55   7
  -8  13  11    2.17    0.48   7
  -8  14  10    3.28    0.41   7
  -8  15   7   34.49    0.63   7
  -7  15   2   13.60    0.52   7
  -7  16   5    3.43    0.37   7
  -7  16   6    4.41    0.36   7
  -7  16   7   40.23    0.53   7
 -10   8   7   72.96    1.11   7
 -10   9   7   12.51    0.79   7
 -10   9   8   60.12    1.05   7
 -10  10   7   12.53    0.80   7
 -10  10   8   19.81    0.86   7
  -9   6   4   42.08    0.76   7
  -9   7   3   61.40    0.93   7
  -9   8  11   47.18    0.97   7
  -9  12  10    4.27    0.59   7
  -8   4   9    1.01    0.42   7
  -8  11  12   23.53    0.74   7
  -8  13   2   24.83    0.78   7
  -7  14  11   57.71    0.64   7
  -6  16   2   14.11    0.42   7
  -6  16   9    2.60    0.22   7
  -5  14  12    1.10    0.24   7
  -9   9  11   27.04    0.81   7
  -9  13   6   86.65    1.05   7
  -9  13   7    5.16    0.62   7
  -8   6  11    4.82    0.63   7
  -8   7   1  103.96    1.00   7
  -8  14   4    5.42    0.62   7
  -7  15   9    0.93    0.39   7
  -9   6   5   43.79    0.79   7
  -9   6   6   -0.28    0.65   7
  -9   6   8   10.74    0.62   7
  -9   8  10   44.50    1.01   7
  -9  11   4   38.80    1.04   7
  -9  12   9    2.80    0.64   7
  -8   4   8  256.08    1.42   7
  -8   9  12    2.78    0.58   7
  -8  10   1    1.87    0.69   7
  -8  13  10   18.48    0.72   7
  -7   4  10   54.11    0.76   7
  -7  12  12    3.49    0.52   7
  -6  11  13    5.54    0.46   7
  -6  16   8   21.96    0.45   7
  -9   6   7  231.62    1.53   7
  -9   7   9    4.56    0.63   7
  -9   8   4   11.85    0.70   7
  -9   9   4  123.52    1.38   7
  -9  10  10    0.76    0.67   7
  -9  12   7   23.84    0.85   7
  -9  12   8    9.83    0.74   7
  -8   9   1  383.48    1.92   7
  -8  13   3   30.76    0.82   7
  -8  14   6   43.34    0.86   7
  -7   5  11    1.01    0.44   7
  -7  12   0  107.14    1.07   7
  -7  13  11   -0.15    0.49   7
  -7  14  10    1.16    0.47   7
  -6  14  11    0.33    0.38   7
  -6  15   1   46.78    0.72   7
  -6  15  10    5.72    0.29   7
  -6  15  10    2.57    0.19   7
  -6  16   3    8.91    0.36   7
  -5  16   1    5.49    0.38   7
  -5  17   4    5.20    0.30   7
  -5  17   5    1.21    0.27   7
  -5  17   6   14.86    0.34   7
  -9   7   6  274.76    1.71   7
  -9   7   7    0.14    0.72   7
  -9   8   5   32.32    0.92   7
  -9   8   9   52.55    0.97   7
  -9   9   9   59.47    1.10   7
  -9  11   5   77.35    1.16   7
  -9  11   6   54.00    1.11   7
  -8   5   9  131.43    1.11   7
  -8   6  10  167.58    1.35   7
  -8   7   2    1.31    0.56   7
  -8  11  11   17.07    0.67   7
  -8  13   9   14.94    0.73   7
  -7   7   0   90.54    0.91   7
  -7  11  12   30.97    0.77   7
  -6  16   7    0.28    0.35   7
  -5  16   9    3.53    0.27   7
  -9   8   6    1.15    0.74   7
  -9   9   5  151.75    1.42   7
  -9   9   8  227.85    1.73   7
  -9  10   5   79.35    1.15   7
  -9  10   6    2.56    0.87   7
  -9  11   7    0.54    0.70   7
  -8   8   2   39.04    0.84   7
  -8  10  11    0.77    0.58   7
  -8  12  10  117.17    1.16   7
  -8  13   4   -0.24    0.61   7
  -7   8  12   10.90    0.65   7
  -7  15   5    2.81    0.49   7
  -7  15   6   27.66    0.65   7
  -7  15   7   22.91    0.58   7
  -6  12  12   63.97    0.82   7
  -6  16   5    7.62    0.46   7
  -6  16   6   27.49    0.57   7
  -4  17   2   -0.20    0.26   7
  -9   9   6   43.86    0.96   7
  -9  10   7   33.61    0.92   7
  -8   9   2  139.82    1.31   7
  -8  13   5   57.70    0.99   7
  -8  13   7   71.05    1.10   7
  -8  13   8    1.04    0.62   7
  -7   9   0   10.90    0.65   7
  -7  10   0    6.12    0.63   7
  -7  12  11    2.05    0.61   7
  -7  14   3    3.07    0.72   7
  -5  14  11    1.64    0.40   7
  -5  15  10    2.40    0.35   7
  -4  17   7    5.18    0.25   7
  -8   6   4   67.22    0.83   7
  -8   8  10   72.46    1.10   7
  -8  10  10   13.33    0.87   7
  -8  12   4   91.67    1.28   7
  -8  12   9   16.56    0.77   7
  -7  12   1  108.57    1.17   7
  -7  13  10    6.11    0.57   7
  -6  11  12   46.45    0.81   7
  -6  13  11   56.13    0.82   7
  -6  14  10   28.14    0.65   7
  -5  16   2   10.87    0.50   7
  -4  13  12   -0.24    0.34   7
  -4  16   9    0.95    0.26   7
  -4  17   3    3.16    0.33   7
  -8   6   5   62.22    0.84   7
  -8   6   8   30.86    0.68   7
  -8   9   3  106.14    1.27   7
  -8   9  10   55.52    0.99   7
  -8  10   3   63.14    1.02   7
  -8  12   5  103.33    1.33   7
  -7  14   4    1.43    0.57   7
  -6   8  12    4.51    0.60   7
  -6  14   1    7.94    0.57   7
  -6  15   8   -0.39    0.51   7
  -5  12  12    9.02    0.54   7
  -4  17   4    0.69    0.33   7
  -4  17   6    9.87    0.30   7
  -8   6   6  348.33    1.75   7
  -8   7   4  153.28    1.24   7
  -8   8   9    1.06    0.71   7
  -8  10   9   52.97    1.08   7
  -7   5   9    0.39    0.42   7
  -7   6  10    6.99    0.52   7
  -7   8  11   61.87    0.94   7
  -7   9  11   18.13    0.86   7
  -7  10  11   34.78    0.84   7
  -7  12  10   45.07    0.95   7
  -7  14   5    3.55    0.64   7
  -7  14   6   50.02    0.89   7
  -6   9  12    8.73    0.64   7
  -6  15   7   20.56    0.69   7
  -5  16   3   22.66    0.58   7
  -4  14  11    0.40    0.37   7
  -4  15  10    4.75    0.38   7
  -3  17   7    0.71    0.24   7
  -8   7   5    4.65    0.52   7
  -8   7   6   -0.66    0.64   7
  -8   8   4    8.61    0.60   7
  -8   8   8   96.79    1.19   7
  -8   9   4    0.38    0.65   7
  -8   9   9   19.22    0.78   7
  -8  10   4   13.43    0.76   7
  -8  11   5   86.60    1.19   7
  -8  11   6   11.33    0.95   7
  -8  11   7   47.20    1.09   7
  -8  11   8   46.68    1.02   7
  -7   8   1  195.51    1.34   7
  -7   9   1    2.41    0.67   7
  -7  10   1   84.00    1.06   7
  -7  12   2   22.85    0.80   7
  -6  12  11    2.50    0.56   7
  -6  14   9    4.21    0.62   7
  -6  15   4    1.27    0.55   7
  -5  11  12  104.08    1.04   7
  -5  13  11   14.05    0.61   7
  -5  15   1   29.00    0.73   7
  -5  15   9    8.03    0.45   7
  -5  16   6    4.19    0.44   7
  -4  16   1    6.57    0.49   7
  -3  16   9    1.17    0.26   7
  -8   8   5   81.28    1.03   7
  -8   9   8   23.10    0.81   7
  -8  10   5   94.30    1.21   7
  -8  10   6    2.03    0.87   7
  -8  10   7   36.99    1.02   7
  -8  10   8  113.28    1.28   7
  -7   5   8    4.64    0.41   7
  -7   6   9  232.51    1.46   7
  -7  11  10   42.71    0.94   7
  -7  13   8    2.28    0.68   7
  -6   5  10   66.25    0.78   7
  -6  12   0  274.53    1.69   7
  -5  14  10   10.92    0.50   7
  -4  12  12   14.38    0.55   7
  -3  15  10   10.24    0.39   7
  -8   9   6    2.20    0.67   7
  -7   7   2  108.86    1.01   7
  -7  10  10  140.24    1.35   7
  -7  11   2   17.89    0.81   7
  -7  12   3    5.65    0.70   7
  -6  14   3    4.40    0.75   7
  -6  14   8    2.55    0.67   7
  -5   9  12    1.94    0.59   7
  -5  15   2   39.66    0.84   7
  -5  15   8    5.94    0.56   7
  -3  17   6    3.85    0.20   7
  -2  14  11    0.72    0.29   7
  -2  16   9    2.15    0.22   7
  -2  16   9    0.67    0.12   7
  -2  17   7   19.96    0.38   7
  -7   7   9    0.51    0.64   7
  -7   8   2    4.28    0.51   7
  -7   9   2  396.85    2.02   7
  -7  10   2    0.44    0.61   7
  -7  11   9   63.61    1.05   7
  -7  12   4    4.78    0.88   7
  -7  12   8   18.60    0.86   7
  -6   8  11   60.55    0.94   7
  -6   9  11   48.03    0.96   7
  -6  10  11  177.76    1.41   7
  -6  13   9   20.10    0.83   7
  -6  14   7    0.81    0.72   7
  -5  12  11   62.86    0.97   7
  -4  11  12   41.15    0.74   7
  -4  13  11   54.98    0.81   7
  -4  15   0    2.39    0.57   7
  -4  15   9   12.99    0.53   7
  -4  16   2   18.71    0.63   7
  -3  16   0   34.43    0.65   7
  -3  17   3    0.05    0.35   7
  -3  17   4    5.21    0.40   7
  -3  17   5    0.15    0.29   7
  -2  15  10    3.75    0.31   7
  -7   7   3   21.51    0.61   7
  -7   8   9   88.12    1.13   7
  -7  10   9    4.53    0.69   7
  -7  12   5    3.78    0.89   7
  -7  12   6   42.91    1.11   7
  -7  12   7    3.29    0.79   7
  -6   9   0   67.96    0.91   7
  -6  10   0  137.07    1.22   7
  -6  13   2    4.40    0.71   7
  -6  14   4    3.17    0.68   7
  -6  14   5    1.25    0.78   7
  -6  14   6    4.77    0.79   7
  -5  13  10    5.74    0.66   7
  -5  14   1  134.14    1.31   7
  -5  15   3    9.05    0.73   7
  -5  15   7   42.05    0.78   7
  -4  16   6    8.44    0.55   7
  -3  16   8    0.72    0.34   7
  -1  15  10    0.94    0.24   7
  -7  10   3    4.29    0.65   7
  -7  11   4    7.31    0.74   7
  -7  11   8   22.60    0.85   7
  -6   7  10    9.68    0.61   7
  -5  13   0  117.47    1.25   7
  -5  15   5   21.32    0.79   7
  -5  15   6   44.56    0.82   7
  -4  16   4    3.43    0.58   7
  -4  16   5    8.29    0.60   7
  -3  13  11    1.07    0.47   7
  -2  17   1   20.10    0.46   7
  -2  17   6    3.85    0.31   7
  -7   7   4    6.21    0.48   7
  -7   9   8  163.26    1.42   7
  -7  10   4   21.66    0.88   7
  -7  11   6    4.03    0.74   7
  -6   8  10   33.45    0.83   7
  -6  10  10  126.16    1.34   7
  -6  13   3    4.84    0.71   7
  -5  10  11   37.06    0.88   7
  -5  14   8   18.21    0.79   7
  -4  12  11   10.03    0.70   7
  -4  15   1   40.85    0.88   7
  -4  15   8    2.60    0.51   7
  -3  15   9    5.37    0.48   7
  -3  16   1   14.00    0.61   7
  -3  16   7   31.33    0.64   7
  -2  16   8   32.78    0.53   7
  -2  17   2    0.45    0.40   7
  -7   7   6   19.74    0.61   7
  -7   8   4   13.49    0.58   7
  -7   9   4  209.40    1.52   7
  -7   9   5   87.37    1.15   7
  -7  10   5    6.77    0.77   7
  -7  10   6    1.65    0.68   7
  -7  10   7    4.17    0.71   7
  -6   6   9    5.91    0.46   7
  -6   9  10  131.96    1.29   7
  -6  10   1   11.31    0.74   7
  -6  12   2    5.82    0.75   7
  -6  13   5    3.44    0.88   7
  -5  13   9   36.12    0.94   7
  -4  14   9   48.74    0.88   7
  -3  14  10    0.17    0.45   7
  -2  13  11   25.97    0.61   7
  -2  17   3    1.82    0.41   7
  -2  17   4    1.53    0.39   7
  -2  17   5    4.02    0.30   7
  -1  17   0   10.64    0.41   7
  -7   9   6  102.90    1.17   7
  -6   8   1   48.81    0.75   7
  -6   9   1  277.33    1.62   7
  -6  11   9    3.26    0.69   7
  -6  12   3   30.73    1.06   7
  -6  12   8   18.82    0.82   7
  -5  12   0   65.14    1.04   7
  -5  13   1   17.78    0.86   7
  -5  14   7    1.30    0.67   7
  -4  13  -1   43.91    0.88   7
  -4  13  10    0.49    0.54   7
  -4  15   7    5.57    0.58   7
  -3  16   2    1.98    0.62   7
  -3  16   6    1.56    0.51   7
  -1  17   6   21.21    0.39   7
  -6   8   9    1.01    0.68   7
  -6   9   9    6.03    0.75   7
  -6  10   9   16.44    0.76   7
  -6  12   7    8.39    0.79   7
  -4  15   6    0.20    0.68   7
  -3  12  11   16.95    0.59   7
  -3  15   8   37.77    0.78   7
  -2  14  10    5.06    0.46   7
   0  16   8    1.41    0.28   7
  -6  10   2  282.45    1.76   7
  -6  11   3   80.38    1.23   7
  -6  11   8    1.38    0.70   7
  -6  12   5   10.66    0.80   7
  -5   7  10    3.79    0.55   7
  -5  11   0  188.99    1.52   7
  -5  13   2    5.44    0.86   7
  -4   9  11  113.99    1.16   7
  -4  14   8   18.19    0.81   7
  -4  15   3    6.57    0.68   7
  -4  15   5   32.53    0.90   7
  -3  15   0   21.60    0.67   7
  -3  16   4    0.19    0.52   7
  -2  16   0   13.74    0.57   7
  -1  14  10    0.67    0.40   7
  -1  15   9    0.01    0.40   7
  -1  17   1    0.87    0.38   7
  -1  17   5    0.33    0.33   7
   0  14  10   11.38    0.42   7
   0  17   6    0.73    0.21   7
   0  17   6    0.19    0.13   7
  -6   8   8   36.86    0.83   7
  -6  10   8  120.33    1.32   7
  -6  11   7   16.71    0.82   7
  -5   8  10   86.60    1.00   7
  -4  13   9   89.00    1.10   7
  -3  14   9  115.64    1.10   7
  -2  12  11    0.71    0.45   7
  -1  17   2    2.86    0.46   7
  -1  17   3    0.65    0.42   7
   0  15   9    1.47    0.34   7
  -6   7   7   11.78    0.51   7
  -6   8   3    7.07    0.57   7
  -6   9   3  191.72    1.45   7
  -6  10   3    2.57    0.63   7
  -6  10   7   38.72    0.94   7
  -6  11   5    3.75    0.73   7
  -6  11   6   15.25    0.81   7
  -5   6   9   90.74    0.89   7
  -5  11   9   21.85    0.85   7
  -5  12   8    2.90    0.81   7
  -5  13   3   13.96    0.86   7
  -5  13   4    3.17    0.88   7
  -5  13   6    6.97    0.89   7
  -4  13   0   32.06    0.91   7
  -4  14   7   15.64    0.87   7
  -3  15   1    3.90    0.79   7
  -3  15   7    3.72    0.58   7
  -2  15   8    0.55    0.55   7
  -1  16  -1    2.34    0.52   7
   0  17   5   43.79    0.59   7
  -6   7   5   34.53    0.65   7
  -6   7   6   29.76    0.64   7
  -6   8   4    4.62    0.56   7
  -6   8   7   16.70    0.62   7
  -6   9   4   23.02    0.79   7
  -6   9   7   25.33    0.76   7
  -6  10   4  456.59    2.25   7
  -6  10   6   43.66    0.93   7
  -5   7   9    1.34    0.52   7
  -5   9   0   23.68    0.62   7
  -5  10   9   30.66    0.97   7
  -5  11   1  455.19    2.26   7
  -5  12   2    5.58    0.70   7
  -5  13   5    0.57    0.73   7
  -4  11  10   30.63    0.84   7
  -3  15   6   27.19    0.88   7
  -2  11  11    9.90    0.61   7
  -2  13  10    5.36    0.53   7
  -2  14   9    1.46    0.60   7
  -2  15  -1   49.76    0.82   7
  -2  16   2    6.37    0.67   7
  -6   8   5    0.67    0.47   7
  -6   9   5   21.63    0.70   7
  -6   9   6   15.77    0.68   7
  -5   8   9    5.85    0.64   7
  -5   9   9    2.12    0.61   7
  -5  12   3  120.58    1.44   7
  -5  12   7    3.26    0.75   7
  -4  10  10   16.72    0.83   7
  -4  11  -1    7.48    0.67   7
  -4  12   9    4.02    0.69   7
  -3  13   9    1.49    0.75   7
  -3  15   2   27.43    0.83   7
  -3  15   5   16.59    0.85   7
  -2  16   3    1.88    0.58   7
  -1  15   8   33.41    0.69   7
   0  16   7   -0.42    0.35   7
   0  17   1   43.65    0.69   7
   1  17  -1    0.61    0.33   7
   1  17   5    4.40    0.35   7
  -5  12   5   41.89    1.09   7
  -5  12   6   37.00    0.98   7
  -4   9  10   93.99    1.09   7
  -3  15   3    0.12    0.67   7
  -3  15   4    5.23    0.71   7
  -2  15   7   58.53    0.90   7
  -1  14   9   18.65    0.71   7
  -1  16   0    1.41    0.59   7
  -1  16   6    6.77    0.51   7
   0  17   2   33.43    0.61   7
   0  17   3   69.41    0.75   7
   1  16   7    9.84    0.36   7
   2  16   7    2.75    0.29   7
   2  17   5   29.86    0.45   7
  -5   7   8  107.73    1.02   7
  -5   9   1   65.91    0.87   7
  -5   9   8   37.09    0.89   7
  -5  11   7   11.36    0.78   7
  -4  10  -1    0.96    0.55   7
  -4  12   8  139.78    1.50   7
  -4  13   7  139.78    1.42   7
  -3  11  10  209.45    1.55   7
  -3  13  -1    1.14    0.61   7
  -3  14   7   64.34    1.05   7
  -2  12  10  112.10    1.19   7
  -2  15   0    3.35    0.64   7
   0  13  10   10.58    0.50   7
   0  15   8    1.98    0.47   7
   1  17   0   14.65    0.50   7
   1  17   4    4.88    0.41   7
  -5  10   7   17.30    0.88   7
  -5  11   4  393.74    2.24   7
  -4  13   3   67.76    1.23   7
  -4  13   6    5.44    0.79   7
  -3  14   1    3.64    0.73   7
  -2  13   9   39.49    0.91   7
  -2  15   6    0.23    0.62   7
  -1  16   1    4.89    0.61   7
  -1  16   4   16.51    0.74   7
   0  14   9   14.40    0.54   7
   0  16  -1   35.28    0.76   7
   0  16   6   49.89    0.72   7
   1  15   8    1.37    0.43   7
   1  17   3   19.49    0.54   7
   2  14   9    0.92    0.32   7
   2  15   8    2.28    0.33   7
  -5   7   7   10.41    0.50   7
  -5   8   7   67.64    0.92   7
  -4   7   9   45.36    0.77   7
  -4  11   0   27.79    0.76   7
  -4  13   4    1.35    0.76   7
  -4  13   5  298.06    2.02   7
  -2  14  -1   31.05    0.88   7
  -2  15   1    9.93    0.74   7
  -2  15   5   96.60    1.21   7
  -1  12  10   10.74    0.69   7
  -1  15   7    0.63    0.57   7
  -1  16   2   24.44    0.70   7
  -1  16   3   16.22    0.70   7
   1  17   1    6.44    0.39   7
   1  17   2    3.54    0.41   7
   2  17   4    3.26    0.35   7
   3  17  -2    5.55    0.36   7
   3  17   4   11.56    0.36   7
  -5   9   3    0.19    0.45   7
  -5  10   4   75.72    1.05   7
  -5  10   5   13.04    0.70   7
  -4   8   9   21.67    0.66   7
  -4  10   0    9.47    0.64   7
  -3   9  10    2.51    0.56   7
  -3  12  -1   99.30    1.21   7
  -3  13   7    4.28    0.87   7
  -2  11  10    1.84    0.58   7
  -2  13  -2    0.21    0.63   7
  -2  14   7   -0.34    0.80   7
  -2  15   2   25.16    0.82   7
  -2  15   3   61.33    1.13   7
  -2  15   4   21.92    0.83   7
  -1  13   9    1.27    0.68   7
  -1  14   8    1.57    0.67   7
  -1  15  -1    3.14    0.58   7
   0  12  10   30.07    0.73   7
   2  17   3   13.12    0.47   7
  -5   8   4  105.52    1.05   7
  -5   8   5   62.92    0.89   7
  -5   8   6   57.93    0.82   7
  -5   9   5    8.16    0.59   7
  -4  11   1    5.58    0.75   7
  -3  11   9    3.43    0.68   7
  -3  12   8   25.12    0.98   7
  -1  15   6    1.59    0.64   7
   0  15   7   54.13    0.82   7
   0  16   0   13.31    0.66   7
   2  16   6    4.69    0.24   7
   2  17   0   -0.14    0.37   7
   2  17   1    2.26    0.43   7
   2  17   2   15.35    0.51   7
   3  16   6    5.44    0.31   7
  -4   9   8   34.66    0.89   7
  -4  12   4  470.55    2.45   7
  -3  10   9   44.58    1.02   7
  -3  13   6   31.21    0.95   7
  -2  14   0   20.77    0.84   7
  -1  15   0   12.61    0.84   7
   0  13   9    9.91    0.70   7
   0  14   8    4.76    0.65   7
   0  15  -2    7.78    0.68   7
   0  16   1   37.90    0.89   7
   0  16   3    0.76    0.68   7
   1  15   7    1.51    0.53   7
   1  16   5   59.12    0.83   7
   3  17  -1    9.90    0.41   7
   4  14   8    0.08    0.26   7
   4  15   7    2.41    0.28   7
   4  17   3    0.32    0.26   7
  -4  10   1   66.38    0.93   7
  -3  11  -1   10.96    0.67   7
  -3  12   0   50.35    0.96   7
  -3  13   5    4.29    0.90   7
  -2  14   1  140.97    1.54   7
  -1  14   7   55.50    1.06   7
  -1  15   1   54.47    1.10   7
  -1  15   5    0.68    0.68   7
   0  16   2   42.43    0.84   7
   1  13   9    3.93    0.60   7
   1  16  -1    4.80    0.63   7
   2  13   9    4.26    0.50   7
   3  15   7    6.11    0.43   7
   3  17   0    2.43    0.41   7
   3  17   2   21.48    0.51   7
  -4   9   1  568.14    2.23   7
  -4  11   5    2.69    0.70   7
  -3   7   9   38.42    0.67   7
  -3  11   8  175.86    1.53   7
  -2  12  -2   58.93    0.91   7
  -2  14   2   10.32    1.00   7
  -2  14   4    5.28    0.94   7
  -1  10  10    1.52    0.66   7
  -1  15   2   21.45    0.96   7
  -1  15   3    1.18    0.83   7
  -1  15   4   22.75    0.86   7
   0  15   6    1.96    0.63   7
   1  16   4    1.63    0.63   7
   2  14   8    1.78    0.53   7
   2  16   5    5.03    0.47   7
   3  14   8    3.74    0.42   7
   3  17   1    0.49    0.37   7
   4  17  -1    1.43    0.32   7
   4  17   2    0.14    0.30   7
  -4  10   2  122.64    1.20   7
  -3  10  -1   43.29    0.82   7
  -2  14   3   35.18    1.00   7
   1  16   0    1.06    0.62   7
   1  16   3   18.25    0.78   7
   2  16  -2    4.67    0.57   7
   3  16   5   14.92    0.48   7
   4  16   5    0.33    0.24   7
   4  17   0    0.28    0.36   7
   4  17   1    4.19    0.36   7
  -4  10   3   25.89    0.72   7
  -3  11   7    1.16    0.68   7
  -3  12   2   78.61    1.26   7
  -2  13   6   -0.37    0.73   7
   1  15   6   54.69    0.87   7
   1  16   1    3.02    0.60   7
   1  16   2   31.23    0.79   7
   2  16   4   46.66    0.83   7
   3  16  -3    2.68    0.45   7
   5  15   6    8.19    0.35   7
   5  17  -1    0.41    0.28   7
   5  17   0    1.92    0.31   7
   5  17   1    4.36    0.30   7
  -4   9   3  256.31    1.56   7
  -3  12   4   12.69    0.82   7
  -2  13   1   10.03    0.89   7
  -1  11   9    1.49    0.62   7
  -1  13  -2   28.38    0.81   7
  -1  14   0    2.19    0.86   7
   1  12   9   33.26    0.83   7
   1  15  -2   20.64    0.82   7
   2  15   6   15.96    0.69   7
   2  16  -1    0.33    0.62   7
   3  16   4   12.77    0.59   7
   5  14   7   10.40    0.39   7
  -3   7   8  726.61    2.37   7
  -3   8   8   34.24    0.69   7
  -3  10   0   -0.01    0.55   7
  -3  11   1    1.17    0.60   7
  -3  11   6  320.30    2.02   7
  -2   8   9    0.25    0.58   7
  -2  13   2  117.64    1.50   7
  -2  13   4    4.08    0.96   7
  -1  12   8    0.15    0.69   7
  -1  14   1   11.20    1.00   7
   0  14  -2    8.38    0.67   7
   0  14   6    3.35    0.83   7
   0  15   1    2.94    0.71   7
   0  15   2    7.55    0.89   7
   0  15   3   16.69    0.84   7
   1  13   8   26.09    0.85   7
   1  14   7   70.84    0.99   7
   1  15   5    0.61    0.72   7
   2  12   9    0.54    0.58   7
   2  16   0   14.18    0.76   7
   2  16   3    4.09    0.57   7
   4  16   4   23.10    0.57   7
   5  16   4    0.02    0.31   7
  -3   9   7    9.46    0.65   7
  -3  11   2  483.84    2.35   7
  -3  11   5    3.32    0.72   7
  -2  10   8  147.87    1.46   7
  -2  12   6   78.11    1.31   7
  -2  13   3   27.08    0.95   7
   0  11   9   25.82    0.85   7
   2  14   7    0.12    0.53   7
   2  16   1    1.67    0.58   7
   3  13   8   10.35    0.60   7
   3  14   7   27.44    0.72   7
   3  16  -2    2.23    0.51   7
   3  16   3    8.03    0.63   7
   4  14   7    7.48    0.50   7
  -3   8   7  124.93    1.16   7
  -3  10   1   85.43    1.06   7
  -3  11   4  252.75    1.80   7
  -2  11  -1   73.37    1.08   7
   0  12   8   23.61    0.90   7
   0  14  -1    8.50    0.90   7
   1  15  -1   60.69    1.04   7
   3  16  -1   14.08    0.72   7
   6  15   5    7.69    0.36   7
   6  16   3    2.36    0.32   7
  -3  10   5    2.49    0.58   7
  -2  12   1    7.35    0.70   7
  -2  12   5   -0.01    0.73   7
  -1   9   9   15.87    0.65   7
  -1  12  -2    0.81    0.58   7
  -1  12   7   12.98    0.80   7
  -1  13   0   10.54    0.94   7
   0  10   9    7.61    0.69   7
   1  11   9    2.44    0.55   7
   1  15   0   11.53    0.78   7
   1  15   3    3.25    0.75   7
   3  15   5   -0.39    0.63   7
   3  16   0   33.97    0.85   7
   3  16   1   20.80    0.79   7
   3  16   2    0.32    0.53   7
   4  16   3    0.39    0.45   7
   5  16   3    9.00    0.45   7
   6  13   7    3.24    0.39   7
   7  16   2    0.67    0.27   7
  -3  10   3  334.47    1.89   7
  -3  10   4  186.06    1.47   7
  -2   8   8  102.42    1.09   7
  -2  10   7   11.10    0.81   7
  -2  11   6    5.71    0.71   7
  -1   8   9   87.17    0.98   7
  -1  13   4   76.61    1.35   7
   1  15   2   55.02    1.08   7
   2  14   6   22.77    0.87   7
   2  15  -2   26.99    0.89   7
   2  15   4   14.19    0.84   7
   4  15   5   30.51    0.67   7
   4  16  -2   19.60    0.61   7
   4  16   2    6.33    0.59   7
   6  14   6    8.02    0.37   7
   7  15   4    4.24    0.31   7
  -3   8   6    3.47    0.46   7
  -2  10  -1    0.80    0.52   7
  -2  11   0   21.45    0.72   7
  -1  13   1    6.48    0.78   7
   0  11   8    1.35    0.81   7
   4  16   0    0.01    0.60   7
   5  16   2    0.90    0.43   7
   6  16   2    8.69    0.41   7
   7  16  -4    0.29    0.26   7
   0  12   7   -0.70    0.74   7
   3  15  -3   -0.10    0.55   7
   3  15   4    0.79    0.61   7
  11   5   5    0.29    0.33   8
  16   5   0   -0.02    0.20   8
   6   3   8    0.10    0.30   8
  15   7  -1   -0.09    0.23   8
   9   7   5    0.57    0.57   8
  12   3   6    0.36    0.33   8
  14   8  -1    0.41    0.29   8
   8   9   2    0.32    0.50   8
   9   8   4    0.03    0.73   8
  10   4   7   -0.12    0.43   8
  15   8  -3    0.00    0.30   8
  15   4   3    0.26    0.20   8
  15   8  -2    0.19    0.32   8
  16   7  -2    0.13    0.24   8
   4   8   3    0.70    0.38   8
   8   6   7   -0.09    0.74   8
   8   7   6    0.01    0.65   8
  13   9  -1    0.05    0.44   8
  16   6   0    0.26    0.19   8
  16   6   0    0.09    0.11   8
   4   6   7    0.82    0.59   8
   8   8   5   -0.73    0.75   8
  13   8   2    0.47    0.53   8
  14   5   4    0.29    0.38   8
  14   7   2    0.47    0.40   8
  10   3   8    0.14    0.54   8
  11   8   4    0.74    0.62   8
  12   2   7   -0.04    0.38   8
  13   5   5   -0.45    0.33   8
  13   5   5   -0.01    0.20   8
   6   7   7    4.51    0.88   8
   7   7   7    1.78    0.93   8
  10   8   5    1.91    0.84   8
  15   5   3   -0.03    0.21   8
  15   5   3    0.07    0.13   8
   4   8   5    0.89    0.60   8
   7   6   8    0.15    0.88   8
   7  10   2    0.14    0.82   8
  11   9   3   -0.02    0.68   8
  12  10  -1   -0.64    0.61   8
  15   8   0   -0.28    0.33   8
   5   5   9   -0.28    0.71   8
   7   5   9    0.19    0.86   8
  13   6   5    0.45    0.35   8
  13   6   5    0.02    0.21   8
   6   8   7    0.08    1.05   8
   5  10   2   -0.00    0.73   8
   6   9   6    0.66    1.12   8
  10   9   5   -0.05    0.87   8
   6   6   9    0.02    0.86   8
  11  11  -1    1.23    0.68   8
   4   9   6   -0.12    0.89   8
   4  10   1    0.55    0.78   8
  11   8   6    0.42    0.62   8
  12   7   6    0.32    0.39   8
  12   7   6    0.17    0.24   8
  14   8   3   -0.26    0.35   8
  11   7   7    0.90    0.53   8
  14  10  -1    0.28    0.33   8
  10   9   6    0.32    0.74   8
  12   6   7    0.23    0.41   8
  12  10   3    0.03    0.54   8
  12  11   0   -0.92    0.55   8
   5   6  10   -0.41    0.90   8
  10   5   9    1.47    0.56   8
  10  10   5    0.27    0.73   8
   3  10   2   -0.06    0.69   8
  13  10   2    0.15    0.33   8
  13  10   2    0.31    0.20   8
   1   4  10    0.19    0.70   8
   6   4  11   -0.34    0.73   8
  12   9   5    0.56    0.36   8
  13   8   5   -0.15    0.29   8
  13   8   5   -0.23    0.16   8
  13   9   4    0.35    0.34   8
   4  11   3    3.13    1.11   8
  10  11   4   -0.55    0.65   8
  11  11   3   -0.24    0.55   8
   9  12   2   -0.01    0.76   8
   2   8   9    1.91    1.19   8
   7   9   9   -0.09    0.92   8
   0   8   7   -0.61    0.72   8
   8   9   9    1.34    0.74   8
   9  12   4   -0.07    0.64   8
  11   9   7    0.30    0.38   8
   3   7  11    0.30    0.94   8
   3  11   7    1.84    1.31   8
   9   7  10    0.60    0.45   8
  11  11   5    0.15    0.36   8
   6  11   8    0.35    0.87   8
   7  12   6   -0.42    0.79   8
  10  11   6    0.38    0.43   8
   3  12   4    0.31    1.29   8
   6   8  11   -0.27    0.81   8
  -1   6  10    1.02    0.73   8
   1  11   5    2.16    1.10   8
   5  13   4    2.12    1.16   8
   8  13   5   -0.12    0.60   8
   6  13   6    0.52    0.74   8
   7  10  10    0.19    0.51   8
   7  11   9    0.38    0.29   8
   9  11   8   -0.29    0.36   8
   4  10  11    2.10    0.95   8
   0  11   6   -0.02    0.99   8
   7   9  11    0.56    0.43   8
   2   9  12    1.12    1.03   8
   4  12   9    0.27    0.81   8
   6  11  10   -0.28    0.53   8
   6  14   3    1.61    0.78   8
   8  11   9    0.26    0.30   8
   8  11   9   -0.17    0.18   8
   8  13   6   -0.01    0.35   8
   8  13   6    0.18    0.21   8
   6  10  11    0.37    0.40   8
   6  10  11   -0.13    0.24   8
   6  12   9   -0.35    0.52   8
   6  14   4    0.35    0.73   8
   8  12   8    0.51    0.37   8
   1  12   2    0.51    0.83   8
   0  11  10    0.48    1.06   8
   0  12   7    0.47    1.05   8
  -2  10   5    0.90    0.79   8
   1  10  12   -0.00    0.90   8
   3  14   4   -0.47    0.91   8
   1   9  13   -0.04    0.88   8
   3  13   9    0.46    0.74   8
   7  13   8    0.11    0.16   8
   7  14   6    0.34    0.35   8
   1  13   3   -1.39    0.86   8
  -2   6  13    1.08    0.82   8
  -1  12   8    1.08    1.05   8
   0   7  14    0.36    0.81   8
   0  13   6   -0.28    1.19   8
   6  13   9    0.25    0.35   8
   6  14   7   -0.21    0.38   8
   2   8  14    6.41    0.66   8
   2  14   7    0.04    0.93   8
   4  11  12   -0.04    0.22   8
   4  14   8   -0.02    0.52   8
  -1   9  13   -0.60    0.85   8
   5  14   8   -0.06    0.39   8
   0  10  13    0.04    0.77   8
  -2  12   5    0.10    1.13   8
   2  14   9    0.35    0.66   8
   3  15   5    0.68    0.63   8
   1  13  11    0.22    0.68   8
   4  15   7    0.76    0.37   8
  -1  12  12    0.41    0.88   8
  -2  13   6   -0.32    0.92   8
   0   8  15    0.08    0.54   8
  -5   6  12    1.70    0.94   8
   1  15   5    0.67    0.73   8
   1  15   7    1.60    0.68   8
   2  15   8    0.69    0.49   8
   1  11  14    0.06    0.31   8
   1  11  14    0.14    0.18   8
   1  15   8    0.84    0.55   8
  -3  13   9    0.69    0.91   8
  -2  11  14    0.19    0.63   8
  -2  14   7   -0.57    0.87   8
   0  14  11   -0.20    0.43   8
   0  10  15   -0.34    0.38   8
  -5   6  14    0.59    0.68   8
  -4  12   5    0.80    1.08   8
  -1  15   7    0.82    0.74   8
   0  15   9    0.25    0.38   8
  -1  13  13   -0.08    0.42   8
  -5  12   8    0.89    1.00   8
  -4  11   3    6.81    0.81   8
  -4  13  10   -0.01    0.82   8
  -1  15   5    0.45    0.68   8
   0  14  12    0.02    0.30   8
  -3  14  10    0.12    0.74   8
  -1  14  12   -0.05    0.38   8
  -7   5   9    0.55    0.72   8
  -6   8   5    0.77    0.61   8
  -6  11  10    0.61    0.94   8
  -4  12  13   -0.19    0.62   8
  -4  13  12    0.24    0.68   8
  -2  15   6    0.83    0.63   8
  -6   9  14    1.21    0.78   8
   0  16   7    0.15    0.33   8
  -6  12  11    1.54    0.83   8
  -3  14  12   -0.15    0.39   8
  -4  14   5   -0.49    0.71   8
  -3  12  15    0.21    0.28   8
  -3  13  14    0.06    0.30   8
  -5  11  15   -0.16    0.42   8
  -5  13   5    0.04    0.73   8
  -8  10  11   -0.57    1.02   8
  -5  13  13    0.01    0.44   8
  -4  12  15    0.56    0.31   8
  -3  14  13   -0.01    0.23   8
  -3  14  13    0.17    0.14   8
  -3  15  11   -0.09    0.29   8
  -6  13  12   -0.23    0.53   8
  -6   9  16   -0.25    0.48   8
  -5  14  12    0.08    0.41   8
  -4  14  13   -0.56    0.28   8
  -4  15   6    0.20    0.58   8
  -8   7   6    0.37    0.61   8
  -4  15  11    0.23    0.30   8
  -7  13  11    0.22    0.65   8
  -6  14  11   -0.14    0.51   8
  -5  14  13   -0.58    0.29   8
  -7  12  14    0.07    0.47   8
  -9   5   8   18.24    0.75   8
  -9   7   7   -0.16    0.70   8
  -8   2  11   -0.18    0.57   8
  -6  13  14   -0.06    0.30   8
  -9  11  11    0.20    0.74   8
  -8  12  13    2.71    0.52   8
  -7  13  13    0.81    0.40   8
 -10   7  12    0.52    0.92   8
  -9   4   8   51.06    0.87   8
  -6  14  13   -0.31    0.26   8
 -10   6  11    0.74    0.73   8
  -9   6   6    2.54    0.59   8
  -9   8   6    0.62    0.71   8
  -6  15   8   -0.04    0.46   8
  -9   4   7  105.08    1.11   8
  -9   4  14   -0.01    0.65   8
  -9   5   6   30.91    0.85   8
  -7  11  16    0.20    0.25   8
  -7  13  14    0.06    0.28   8
 -10   5   9   95.62    1.25   8
  -9   3   8  607.42    2.41   8
  -9  11   7    0.55    0.79   8
  -7  11   3   -0.60    0.58   8
  -9   4   6  128.02    1.22   8
  -9   6   5   43.31    0.84   8
  -7  14  13   -0.09    0.24   8
 -10   4   9    0.22    0.59   8
 -10   6   7   41.59    1.05   8
  -9   5   5    5.22    0.59   8
  -8   6   3    7.23    0.57   8
  -8   7   3   37.31    0.76   8
  -8   8   3    0.14    0.55   8
  -8  14   9   -0.14    0.51   8
  -8  14  11    0.21    0.37   8
 -10   5   7  245.70    1.76   8
  -9  11  15    0.21    0.35   8
  -9  12  14   -0.47    0.35   8
  -8  11  16    0.28    0.24   8
  -8  13  14    0.29    0.26   8
  -7  15   9   -0.11    0.32   8
 -11   6  10   -0.07    0.87   8
 -10   3  10   30.06    0.80   8
  -9   3   6   28.08    0.69   8
  -9   7   4   14.89    0.80   8
  -9   8   4   12.86    0.86   8
  -9  10  16   -0.46    0.31   8
  -8   9  17   -0.43    0.24   8
  -8  14  12    0.36    0.25   8
 -11   6   9    5.93    0.91   8
 -11   8   9   80.58    1.25   8
 -11   9   9   18.84    1.04   8
 -10   3   9    4.80    0.60   8
 -10  11  14    0.40    0.44   8
 -10  12  11    0.19    0.52   8
  -9   6   4   44.19    0.81   8
  -9   9   4  132.69    1.45   8
 -11   7   8   91.42    1.30   8
 -11   8   8   16.66    1.04   8
 -10   3   8    2.26    0.62   8
 -10   5   6   23.76    0.76   8
  -9   5   4   15.21    0.65   8
 -10   7   5   26.12    0.96   8
 -10   8   5   54.05    1.15   8
  -9   1   9   40.08    0.70   8
  -8   6   2  180.49    1.33   8
  -8   7   2    0.99    0.46   8
  -8   8   2   42.54    0.81   8
 -11   7   7   21.79    0.91   8
 -11   8   7    6.80    0.94   8
 -11  10  14   -0.17    0.48   8
 -10   3   7   50.36    0.89   8
 -10   4   6  162.87    1.37   8
 -10   6   5    2.59    0.62   8
 -10   9   5   74.79    1.25   8
  -9   4   4   25.18    0.69   8
  -9  14  11   -0.30    0.27   8
 -11   9   7   95.82    1.32   8
 -11   9  15    0.72    0.43   8
 -11  11  13   -0.21    0.41   8
 -10   5   5  249.63    1.68   8
 -10  12   7   -0.23    0.73   8
 -10  12  14   -0.02    0.26   8
  -9   6   3  193.14    1.48   8
  -9   7   3   67.95    0.98   8
  -9   8   3    6.61    0.66   8
  -9   9   3   35.91    0.93   8
 -12   6  10   60.82    1.24   8
 -12   6  11    0.70    0.72   8
 -11   4   8    3.60    0.69   8
 -11   4  14    0.72    0.63   8
 -11   5   7   11.01    0.77   8
 -10   2   8  216.80    1.50   8
 -10  10   5   12.48    0.80   8
 -10  10  16   -0.49    0.22   8
 -10  10  16   -0.10    0.12   8
  -9  14   8    0.06    0.40   8
 -12   5  12    0.36    0.78   8
 -12   6   9    2.76    0.91   8
 -12   7   9   36.43    1.01   8
 -12   8   9    0.94    0.79   8
 -12   9  10    2.21    0.72   8
 -11   3   9   27.04    0.83   8
 -11   8   6    8.72    0.81   8
 -10   4   5  135.42    1.25   8
 -10  13  13    0.05    0.24   8
  -9   5   3  138.35    1.20   8
 -12   5  10   13.42    0.84   8
 -12   7   8    1.80    0.97   8
 -11   3   8   41.91    0.98   8
 -11   9   6   21.44    0.93   8
 -11  12  13   -0.44    0.34   8
 -10   2   7  214.31    1.48   8
 -10   6   4    2.84    0.60   8
 -10   9   4  232.55    1.76   8
 -12   4  10    3.69    0.87   8
 -12   4  11    7.31    0.74   8
 -12   4  12   24.38    0.94   8
 -12   5   9    4.69    0.79   8
 -12   6   8   75.00    1.24   8
 -12   8   8   27.36    0.98   8
 -12  10  13    0.25    0.43   8
 -11   5   6   50.32    1.01   8
 -11  11   7   18.36    0.77   8
 -10   5   4   45.52    0.85   8
 -10  10   4   65.91    1.14   8
  -9   4   3    6.30    0.48   8
  -9   7   2  138.65    1.30   8
  -8   6   1   23.63    0.65   8
 -12   4   9  133.94    1.52   8
 -12   5   8   12.37    0.97   8
 -11   6   5    7.60    0.86   8
 -11   7   5   11.76    0.83   8
 -11   8   5   22.21    0.92   8
 -11  11  15    0.52    0.24   8
 -10   3   5   14.38    0.63   8
  -9   6   2   24.56    0.76   8
  -9   8   2    0.09    0.58   8
 -12   8   7    0.06    0.76   8
 -12  10   8    1.73    0.69   8
 -11   9   5   17.32    0.82   8
 -11  11   6   25.01    0.89   8
 -11  13  10   24.01    0.52   8
 -10   4   4   65.85    0.95   8
 -10   7   3   63.10    1.15   8
 -10   8   3    0.16    0.79   8
  -9   5   2   12.34    0.62   8
 -13   6  12    1.49    0.69   8
 -13   7  13   21.65    0.77   8
 -13   8  10    4.30    0.84   8
 -13   8  11    2.53    0.67   8
 -13   8  12    3.30    0.61   8
 -13   8  13    6.93    0.67   8
 -13   9  11    2.07    0.69   8
 -12   3  10   11.00    0.80   8
 -12   3  11   42.87    1.01   8
 -12   3  12    8.02    0.73   8
 -12   4   8    4.23    0.77   8
 -12   5   7   38.54    1.14   8
 -11   2   8    2.98    0.58   8
 -11  13   9    5.19    0.45   8
 -11  13  12    0.02    0.24   8
 -10   1   7   90.12    1.01   8
 -10   6   3   12.32    0.70   8
 -10   9   3  105.44    1.31   8
 -10  13   6    0.67    0.51   8
 -13   5  11    0.89    0.87   8
 -13   6  10   21.88    0.93   8
 -13   8   9    5.02    0.86   8
 -13   9  10    3.47    0.73   8
 -12   3   9    5.84    0.75   8
 -12   7   6   60.18    1.30   8
 -12   8   6    9.88    0.99   8
 -12  10   7   13.00    0.86   8
 -12  10  15    0.27    0.28   8
 -12  11  14    3.16    0.30   8
 -12  12  11    8.49    0.44   8
 -11   3   6  147.71    1.39   8
 -10   5   3   23.10    0.78   8
 -10  14   8    3.83    0.34   8
 -13   5  10   10.24    0.84   8
 -13   5  13    4.60    0.67   8
 -13   6  14   -0.04    0.60   8
 -13   9   9    4.52    0.79   8
 -13  10  11   12.62    0.65   8
 -12   3   8   18.16    0.98   8
 -12   4   7    0.39    0.74   8
 -12   6   6   16.08    0.90   8
 -12  12  10    2.47    0.41   8
 -12  12  12    1.67    0.32   8
 -11   1  11  452.16    2.20   8
 -11   4   5  129.63    1.35   8
 -11   7   4  220.41    1.76   8
 -10   1   6  123.17    1.18   8
 -10   3   4    0.59    0.49   8
 -10  10   3    0.67    0.68   8
  -9   4   2   10.12    0.55   8
 -13   4  10   22.06    1.03   8
 -13   4  12   59.95    1.12   8
 -13   5   9   43.64    1.09   8
 -13   5  14   12.82    0.73   8
 -13   9  14    5.37    0.40   8
 -13  10  10    2.80    0.55   8
 -13  10  13   25.40    0.59   8
 -12   2  10   67.85    1.22   8
 -12   2  12   59.66    1.07   8
 -12   5   6    8.59    0.84   8
 -12  11   7    9.32    0.71   8
 -12  12   9    1.98    0.42   8
 -11   1   9  113.24    1.21   8
 -11   9   4  103.16    1.31   8
 -11  12   6    2.01    0.53   8
 -10   0   8    4.03    0.58   8
 -10   4   3   44.06    0.84   8
  -9   7   1   19.66    0.78   8
 -13   6  15   24.04    0.66   8
 -13   7  15   18.32    0.58   8
 -13   8  15    4.70    0.42   8
 -13   9   8    3.16    0.72   8
 -12   2   9   67.36    1.23   8
 -12   3   7   64.08    1.25   8
 -12   7   5   48.85    1.18   8
 -12  10   6   24.60    0.83   8
 -11   1   8    4.65    0.61   8
 -11   2   6    1.52    0.68   8
 -11   3   5    1.52    0.63   8
 -11  13   7   -0.54    0.42   8
 -10   8   2   42.27    0.98   8
  -9   6   1  123.48    1.19   8
 -13   7   7    7.15    1.01   8
 -13  10  14    0.16    0.29   8
 -13  11  11    1.08    0.39   8
 -12   4   6   45.87    1.06   8
 -12   8   5   10.35    0.82   8
 -12  12   8    5.33    0.48   8
 -11   4   4    0.49    0.63   8
 -10   2   4  461.07    2.15   8
 -10   9   2   85.07    1.19   8
 -14   6  12    8.56    0.82   8
 -14   7  13    3.14    0.60   8
 -14   8  12   29.64    0.79   8
 -13   3  10  117.69    1.45   8
 -13   3  11    1.05    0.76   8
 -13   3  12   18.66    0.84   8
 -13   4   8    3.27    0.96   8
 -13   4  14    0.58    0.54   8
 -13   5  15    1.60    0.55   8
 -13   9   7    0.48    0.82   8
 -13   9  15    1.43    0.31   8
 -13  11  13    1.09    0.29   8
 -12  11   6    3.05    0.67   8
 -11   1   7  125.65    1.29   8
 -11   6   3   38.35    1.06   8
 -11   8   3   70.88    1.28   8
 -10   1   5   76.08    0.96   8
 -10   3   3   11.52    0.60   8
 -14   6  13    0.95    0.58   8
 -14   7  10   12.87    0.81   8
 -14   8  10   15.81    0.76   8
 -14   8  13    0.81    0.45   8
 -13   3   9   44.76    1.10   8
 -13  11   9    2.61    0.39   8
 -12   3   6   83.14    1.26   8
 -16   2  14    4.84    0.51   9
 -16   2  15    2.90    0.47   9
 -15  -1  12    2.25    0.97   9
 -14  -2  10  102.00    1.43   9
 -14  -1   9    9.15    1.06   9
 -14   1   8    6.93    1.03   9
 -13  -3   9   43.92    1.16   9
 -13  -2   8    8.03    1.09   9
 -12  -5  14   10.84    0.94   9
 -12  -4  17    8.48    0.61   9
 -12   1   5    4.31    0.79   9
 -11  -4   7    7.16    0.79   9
 -11  -3   6  142.10    1.50   9
 -10  -6  10   49.80    1.19   9
 -10  -2   4  441.60    2.09   9
  -9  -6   8   10.51    0.72   9
  -9  -5   6   32.15    0.77   9
  -8  -6   7    8.21    0.58   9
 -15   1  18    1.73    0.32   9
 -14  -3  13   15.31    0.92   9
 -14  -2  17    0.63    0.52   9
 -14   2   8  102.82    1.33   9
 -13  -4  14    1.04    0.92   9
 -12  -5  12   -0.14    0.89   9
 -12  -1   6   12.20    0.94   9
 -12   2   5   84.17    1.09   9
 -10  -6  11    0.67    0.92   9
 -10  -6  12    6.83    0.90   9
 -10  -4   6  162.36    1.42   9
  -9  -4   5  192.43    1.40   9
 -15  -1  14    6.39    0.77   9
 -15   0  17    2.03    0.48   9
 -14  -2  11    8.36    0.99   9
 -14  -1  18    0.23    0.37   9
 -13  -3  10  113.69    1.48   9
 -13  -3  17    6.96    0.56   9
 -13   0   7   47.82    1.08   9
 -12  -2   7  166.02    1.63   9
 -12  -2  19    2.63    0.33   9
 -11  -5  15    5.42    0.75   9
 -10  -5   8   28.69    0.87   9
  -9  -6   9   70.17    1.07   9
  -8  -6   8   32.59    0.86   9
 -15   2  18    0.43    0.14   9
 -15   3  11   27.01    0.91   9
 -15   5  12    1.48    0.53   9
 -14  -1  10    9.64    0.93   9
 -13  -1   8   64.00    1.21   9
 -13  -1  19    0.10    0.30   9
 -13   1   7    1.65    0.88   9
 -12  -4  10    5.33    0.89   9
 -12  -4  16   37.55    0.89   9
  -9  -5   7    5.60    0.62   9
  -8  -5   6   24.68    0.64   9
 -15   0  13   87.15    1.20   9
 -15   1  12    3.55    0.88   9
 -14   1   9    8.11    0.79   9
 -14   1  19   11.29    0.32   9
 -13  -3  11    2.41    0.91   9
 -13  -3  16   31.77    0.78   9
 -13   2   7    3.74    0.81   9
 -13   3   7   21.96    0.85   9
 -12  -4  11    8.33    1.04   9
 -12   0   6   28.00    0.88   9
 -11  -5  11    7.23    0.89   9
 -11  -5  12    6.15    1.01   9
 -11  -3   7    1.81    0.68   9
 -11  -2   6    1.96    0.61   9
 -10  -5   9   92.02    1.29   9
 -10  -4   7   36.67    0.92   9
  -9  -6  11    7.79    0.75   9
  -9  -6  12   74.74    1.15   9
  -8  -6   9   24.83    0.82   9
 -15   1  13   42.76    1.04   9
 -15   2  12   81.07    1.18   9
 -15   2  17    8.98    0.45   9
 -15   3  12   61.40    1.04   9
 -15   4  12   24.39    0.77   9
 -15   4  17    2.80    0.29   9
 -15   5  13    2.97    0.50   9
 -14   0  10   60.31    1.19   9
 -14   0  18    0.74    0.39   9
 -14   2   9    9.08    0.81   9
 -14   3   9   80.90    1.20   9
 -14   4   9    0.90    0.59   9
 -13  -3  12   18.68    1.02   9
 -12  -4  12   26.41    1.12   9
 -12  -3   9    6.02    0.86   9
 -12  -1   7    6.66    0.89   9
 -12   1   6   12.04    0.80   9
 -11  -4   9   75.15    1.32   9
 -10  -3   6   10.87    0.63   9
  -9  -4   6  124.61    1.14   9
 -15   1  14    4.24    0.76   9
 -15   2  13   12.40    0.81   9
 -15   3  17   -0.29    0.32   9
 -15   5  14    1.67    0.45   9
 -15   5  15    0.76    0.36   9
 -13  -2  10  143.07    1.58   9
 -13  -2  17   13.93    0.68   9
 -13  -1   9    1.64    0.82   9
 -13   0  19    3.66    0.37   9
 -12  -2   8  101.77    1.30   9
 -11  -4  16    0.19    0.65   9
 -10  -5  10   18.10    0.85   9
  -9  -5   8   18.81    0.74   9
  -8  -6  10  169.43    1.37   9
  -8  -6  11    4.19    0.73   9
  -8  -5   7  182.84    1.34   9
 -15   2  14    8.84    0.76   9
 -15   2  16    2.31    0.48   9
 -15   3  13    0.98    0.69   9
 -15   3  16    3.20    0.46   9
 -15   4  16   11.86    0.47   9
 -14   1  10    8.05    0.87   9
 -13  -2  11   81.49    1.40   9
 -12  -3  10   10.58    0.89   9
 -12  -2  18    4.07    0.54   9
 -12  -1  19    0.86    0.36   9
 -11  -4  10    4.44    0.99   9
 -11  -3   8   42.47    1.05   9
 -10  -5  14    3.41    0.68   9
  -7  -6   9  256.53    1.50   9
 -15   3  14   27.68    0.68   9
 -15   3  15   24.72    0.61   9
 -15   4  15    1.99    0.43   9
 -14  -1  15   79.87    1.11   9
 -14   1  18    0.63    0.36   9
 -14   2  10  103.52    1.28   9
 -14   3  10   58.14    1.09   9
 -13  -2  16    1.14    0.73   9
 -13   2   8    8.70    0.88   9
 -12  -3  16    4.51    0.74   9
 -11  -2   7    9.61    0.67   9
 -10  -5  12   10.28    0.81   9
 -14   0  12    9.37    0.90   9
 -14   1  11    3.08    0.85   9
 -14   2  18   12.23    0.45   9
 -13  -2  12    4.50    0.88   9
 -13  -1  10  179.99    1.66   9
 -13   0   9    7.91    0.86   9
 -13   1  19   -0.00    0.32   9
 -13   4   8    3.04    0.68   9
 -12  -3  11   43.48    1.08   9
 -12  -2   9   66.11    1.14   9
 -12  -1   8    4.40    0.72   9
 -11  -4  11    6.25    0.81   9
 -11  -4  14   -0.27    0.86   9
 -11  -3  17   26.99    0.77   9
 -10  -3   7   49.80    0.86   9
 -10  -2   6   56.79    0.89   9
  -9  -5  14   41.42    0.92   9
  -8  -5   8   31.26    0.75   9
 -14   2  11    8.00    0.95   9
 -14   3  18    0.66    0.34   9
 -14   4  18    1.15    0.28   9
 -14   5  11   65.57    0.96   9
 -14   7  15    4.16    0.31   9
 -13   1   9    2.09    0.87   9
 -12  -3  13   83.59    1.37   9
 -12  -3  15    1.88    0.76   9
 -12  -2  17    7.75    0.67   9
 -11  -4  12    8.30    0.83   9
 -11  -3   9   26.80    0.88   9
 -10  -4   9    1.74    0.61   9
  -9  -5  10   80.12    1.05   9
  -9  -3   6   25.23    0.61   9
 -14   1  12  251.57    1.81   9
 -13  -1  11   15.19    0.91   9
 -13   2  19    2.36    0.32   9
 -12  -2  10   67.47    1.14   9
 -12   2   7  171.78    1.41   9
 -11  -2   8    3.52    0.66   9
 -11  -2  18    0.46    0.50   9
 -11  -1  19   12.78    0.49   9
  -9  -5  12    7.28    0.70   9
  -9  -5  13    2.01    0.62   9
  -9  -4   8   45.38    0.86   9
 -14   2  17    0.12    0.44   9
 -14   5  17    2.18    0.33   9
 -14   6  13    0.52    0.52   9
 -14   6  16    0.92    0.31   9
 -13  -1  12  300.92    1.98   9
 -13  -1  16    1.86    0.65   9
 -13   2   9   20.41    0.87   9
 -13   3  19    2.07    0.30   9
 -12  -1   9   18.54    0.84   9
 -12  -1  18    0.40    0.48   9
 -11  -3  10   41.57    1.00   9
 -10  -4  10   34.11    0.86   9
 -10  -3   8    2.80    0.57   9
 -10  -3  17   28.66    0.77   9
 -14   4  17    3.97    0.39   9
 -14   6  15    0.33    0.39   9
 -13   0  11   49.01    1.20   9
 -13   0  17   21.54    0.74   9
 -13   1  18    8.97    0.54   9
 -13   3   9   40.23    0.87   9
 -13   4   9   45.10    0.93   9
 -12  -2  11  256.92    1.84   9
 -11  -3  11   66.29    1.19   9
 -10  -4  11    1.70    0.68   9
 -10  -4  12   10.19    0.92   9
 -10  -1   6  112.23    1.02   9
  -8  -5  10   62.56    0.89   9
 -14   2  14   56.59    0.97   9
 -14   2  15   10.04    0.67   9
 -14   3  13   13.83    0.83   9
 -14   3  16    0.30    0.57   9
 -14   4  13    3.55    0.70   9
 -14   4  16    2.94    0.50   9
 -14   5  16    5.32    0.42   9
 -12  -2  13  102.00    1.39   9
 -12  -1  10   63.65    1.17   9
 -12   1   8    4.84    0.67   9
 -12   1  19    0.88    0.37   9
 -11  -3  12   65.75    1.22   9
 -11  -3  14   29.56    1.00   9
 -11  -2  17   25.65    0.81   9
 -11   0   7  112.10    1.16   9
 -11   2   6    0.79    0.47   9
 -10  -4  13    0.93    0.75   9
 -10  -2  18   30.68    0.67   9
  -9  -4   9   12.98    0.63   9
  -9  -3   7   21.75    0.61   9
  -8  -5  11   16.68    0.67   9
  -8  -5  12   16.19    0.65   9
  -7  -5   9    0.61    0.50   9
 -14   3  14   22.55    0.74   9
 -14   3  15    3.44    0.58   9
 -14   4  14    4.16    0.68   9
 -14   5  14   11.24    0.56   9
 -14   5  15    3.46    0.47   9
 -13   1  11   14.12    1.00   9
 -13   2  18   -0.18    0.40   9
 -13   7  17   12.98    0.33   9
 -13   8  15    5.03    0.30   9
 -12   0  18   19.01    0.63   9
 -12   2   8  104.74    1.21   9
 -11  -3  13   20.31    0.92   9
 -11  -1   8    4.46    0.60   9
 -11  -1  18   19.47    0.66   9
 -11   0  19    1.41    0.43   9
 -11   2  20    0.09    0.24   9
 -10  -3   9    4.33    0.59   9
 -10   1  20   11.14    0.35   9
  -9  -3  17   -0.16    0.54   9
  -8  -4   8  237.61    1.40   9
 -13   0  13  117.50    1.35   9
 -13   1  17   -0.69    0.52   9
 -13   3  10  110.76    1.21   9
 -13   3  18    5.18    0.45   9
 -13   4  10   20.78    0.85   9
 -13   5  10   10.25    0.60   9
 -13   5  18    3.79    0.32   9
 -12  -1  11  156.39    1.47   9
 -11  -2  10    5.02    0.70   9
 -10  -2   8  213.09    1.45   9
 -10   0   6  159.41    1.18   9
  -9  -4  10   10.81    0.64   9
  -9  -4  14    1.34    0.71   9
  -9  -2  18    0.02    0.48   9
  -7  -5  10  167.59    1.19   9
 -13   1  12  292.70    1.86   9
 -13   1  16    2.82    0.65   9
 -13   2  11   84.99    1.19   9
 -13   2  17   14.17    0.66   9
 -13   4  18    6.91    0.32   9
 -12  -1  12   24.01    1.02   9
 -12   3   8   16.66    0.66   9
 -12   4   8    3.41    0.62   9
 -11   1   7  117.32    1.09   9
 -11   3  20    4.26    0.25   9
 -10  -3  10   27.41    0.77   9
  -9  -4  12   17.80    0.85   9
  -9  -4  13   67.18    0.98   9
 -13   1  15   45.28    0.93   9
 -13   3  11    1.71    0.81   9
 -13   5  11    0.90    0.70   9
 -13   6  17    3.75    0.33   9
 -13   7  13   20.31    0.59   9
 -12  -1  13   39.24    1.00   9
 -12  -1  14   46.83    1.01   9
 -12   1  18    0.71    0.45   9
 -12   3  19   11.33    0.37   9
 -12   4  19    2.01    0.32   9
 -12   5  19    8.65    0.32   9
 -11  -2  11  104.38    1.24   9
 -11  -1  17   10.57    0.71   9
 -10  -3  11    7.60    0.68   9
 -10  -2  17   31.33    0.73   9
 -10   2  20    4.45    0.29   9
  -9  -2   7   68.67    0.82   9
  -9   1  20    5.85    0.30   9
  -8  -4   9    1.00    0.46   9
 -13   2  12    2.26    0.74   9
 -13   4  11   21.86    0.81   9
 -13   4  17   34.05    0.66   9
 -13   5  17    8.76    0.41   9
 -13   6  12    1.96    0.61   9
 -13   7  14    5.15    0.49   9
 -11  -2  12   58.03    1.05   9
 -11  -2  14    1.77    0.78   9
 -11   2   7    8.16    0.53   9
 -10  -3  13  160.69    1.39   9
 -10  -1  18   -0.03    0.46   9
 -10   1   6  112.66    0.96   9
  -9  -3   9   33.21    0.73   9
  -8  -4  10   35.99    0.77   9
  -8  -4  14   24.84    0.71   9
 -13   2  13   16.07    0.83   9
 -13   2  15    6.27    0.69   9
 -13   3  12   16.84    0.78   9
 -13   3  16   31.55    0.78   9
 -13   4  12   58.75    1.03   9
 -13   6  13   25.83    0.74   9
 -13   6  16    0.28    0.37   9
 -12   0  12 1014.46    3.30   9
 -12   1  10   64.03    1.05   9
 -12   1  17    4.39    0.67   9
 -12   3   9    5.76    0.77   9
 -12   5   9    4.07    0.65   9
 -11  -1  10   23.10    0.78   9
 -11   1   8    4.38    0.67   9
 -11   3   7    0.60    0.47   9
 -10   3  20   -0.42    0.23   9
  -9  -3  15   17.71    0.80   9
  -9  -2  17    7.78    0.63   9
  -8  -4  12  387.38    1.87   9
  -8  -4  13    2.42    0.68   9
 -13   3  13    0.29    0.67   9
 -13   3  15    1.47    0.61   9
 -13   4  16    0.34    0.50   9
 -13   5  13    4.68    0.74   9
 -13   6  14    0.29    0.55   9
 -12   0  14  378.13    2.03   9
 -12   1  11  154.20    1.47   9
 -12   4   9  124.83    1.15   9
 -12   6  18    9.43    0.35   9
 -11  -1  11  463.31    2.25   9
 -11   0   9    3.79    0.59   9
 -11   2  19    8.81    0.41   9
 -11   4   7    6.80    0.48   9
 -10  -2  10   52.57    0.87   9
 -10   2   6   60.38    0.79   9
  -9  -3  10   29.93    0.70   9
  -9   0  19    1.74    0.41   9
  -9   2  20   21.34    0.41   9
 -13   4  14    0.28    0.61   9
 -13   5  14   12.16    0.58   9
 -13   5  15    1.61    0.50   9
 -12   2  17    6.40    0.65   9
 -12   4  18    0.86    0.43   9
 -12   5  18    2.56    0.38   9
 -12   7  17   12.88    0.40   9
 -12   8  16    2.83    0.31   9
 -11  -1  12  107.00    1.30   9
 -11  -1  15  154.29    1.38   9
 -11   0  17    7.84    0.62   9
 -11   1  18   21.71    0.67   9
 -11   2   8    4.86    0.63   9
 -11   3  19    0.46    0.37   9
 -10  -2  11   89.34    1.12   9
 -10  -1  17   12.82    0.73   9
 -10   1  19    1.66    0.41   9
  -9  -3  11   13.21    0.74   9
  -9  -3  14    8.13    0.67   9
  -9  -2   8   62.79    0.79   9
  -9  -1  18   37.28    0.65   9
 -12   2  11  245.12    1.69   9
 -12   3  10    9.88    0.70   9
 -12   6  10   60.11    0.85   9
 -12   8  15    1.58    0.38   9
 -11  -1  14  160.05    1.42   9
 -11   1   9  108.07    1.13   9
 -11   4  19   27.44    0.50   9
 -11   5  19    9.80    0.35   9
 -10  -2  12  252.33    1.69   9
 -10  -2  13   16.09    0.87   9
 -10  -2  14   26.42    0.82   9
 -10  -1   9    3.99    0.54   9
 -10   0  18   68.32    0.82   9
 -10   3   6   11.09    0.45   9
  -9  -3  13   36.41    0.84   9
  -9   3  20   13.51    0.34   9
  -8  -3  15   22.21    0.78   9
  -8   2  20    8.85    0.31   9
  -7  -4  10   50.97    0.72   9
 -12   1  13   37.09    0.94   9
 -12   3  17   20.63    0.62   9
 -12   4  10    4.46    0.68   9
 -12   6  17   -0.22    0.39   9
 -12   8  13    2.31    0.46   9
 -12   8  14   29.72    0.60   9
 -11   2  18    0.31    0.55   9
 -10   0   8    4.41    0.46   9
  -9  -2   9  134.86    1.07   9
  -8  -1  18    3.07    0.50   9
  -7  -4  11  208.10    1.28   9
  -7  -4  12    8.31    0.51   9
 -12   2  12   61.78    1.02   9
 -12   3  11   44.66    0.90   9
 -12   6  11    2.12    0.65   9
 -12   7  12   10.11    0.59   9
 -12   7  16   31.41    0.53   9
 -11   0  11  424.11    2.07   9
 -11   1  17    9.45    0.63   9
 -11   4   8    3.69    0.51   9
 -11   7  18   11.48    0.34   9
 -10  -1  10   69.62    0.92   9
  -9   1  19    2.80    0.40   9
  -9   4  20    4.73    0.27   9
  -8  -3  10   28.87    0.70   9
  -8  -3  14    1.50    0.68   9
 -12   2  13  101.21    1.18   9
 -12   3  12    8.38    0.81   9
 -12   3  16    5.65    0.63   9
 -12   4  11    8.48    0.72   9
 -12   5  11   34.59    0.81   9
 -12   6  16    4.42    0.51   9
 -12   7  13   13.17    0.63   9
 -11   1  10   23.25    0.74   9
 -11   2   9   30.88    0.77   9
 -11   3  18    7.21    0.55   9
 -11   8  17   18.11    0.40   9
 -10   1  18    1.15    0.48   9
 -10   2   7  216.33    1.25   9
 -10   3  19   12.52    0.47   9
  -9  -2  10  133.16    1.09   9
  -9  -2  15   19.36    0.77   9
  -9  -1   8   18.31    0.54   9
  -8  -3  11  190.79    1.32   9
  -8  -3  13   97.93    1.11   9
  -8  -2  16   55.51    0.89   9
  -8   3  20    1.89    0.25   9
 -12   3  13   83.14    1.07   9
 -12   4  12   25.62    0.89   9
 -12   4  16   37.88    0.75   9
 -12   5  12    0.27    0.75   9
 -12   5  16    1.57    0.50   9
 -12   6  15    3.11    0.58   9
 -12   7  14    2.13    0.48   9
 -11   1  11  458.93    2.14   9
 -11   3   9   25.66    0.79   9
 -11   4  18    0.22    0.48   9
 -11   6  18   19.52    0.43   9
 -11   9  15    0.46    0.34   9
 -10  -1  11   19.17    0.71   9
 -10  -1  12  313.20    1.80   9
 -10  -1  14   16.59    0.86   9
 -10   1   8   46.12    0.71   9
 -10   4  19    6.95    0.41   9
 -10   6  19    1.77    0.28   9
  -9  -2  11   76.72    0.97   9
  -8   1  19    1.07    0.41   9
  -8   4  20    0.42    0.21   9
  -7   3  20    0.17    0.20   9
 -12   4  13   56.73    0.95   9
 -12   4  15    5.41    0.63   9
 -12   6  14   24.61    0.65   9
 -11   1  15  151.47    1.39   9
 -11   2  10    4.32    0.63   9
 -11   4   9   72.77    0.99   9
 -11   5   9    5.11    0.62   9
 -11   6   9    4.69    0.59   9
 -11   9  13    2.65    0.42   9
 -11   9  14    4.16    0.40   9
 -10  -1  13  100.58    1.15   9
 -10   2  18   38.39    0.74   9
 -10   3   7   47.10    0.67   9
 -10   5  19   53.79    0.56   9
 -10   8  18    1.57    0.22   9
 -10   9  17   13.54    0.32   9
  -9  -2  12  464.21    2.00   9
  -9  -1  16    8.91    0.75   9
  -9   2  19    5.10    0.40   9
  -8  -1  17    4.85    0.63   9
  -8   0  18   47.59    0.75   9
 -11   1  12  105.79    1.17   9
 -11   1  13   26.64    0.84   9
 -11   1  14  157.82    1.36   9
 -11   7  10   28.49    0.70   9
 -11   7  17    2.00    0.28   9
 -10   0  10   79.12    0.93   9
 -10   1  17   14.12    0.66   9
 -10   2   8  212.87    1.30   9
 -10   4   7   36.93    0.61   9
  -9  -1   9   44.46    0.69   9
  -9   0  17    4.61    0.66   9
  -9   1  18   40.37    0.74   9
  -7   1  19    1.97    0.37   9
 -11   2  11  106.22    1.13   9
 -11   2  15   36.82    0.96   9
 -11   3  10   37.83    0.78   9
 -10   1   9    4.28    0.47   9
 -10   3  18    7.21    0.56   9
 -10   7  18    2.01    0.32   9
 -10  10  15    3.69    0.29   9
  -9  -1  15  102.99    1.17   9
  -9   3  19    2.12    0.38   9
  -9   7  19    6.94    0.26   9
  -8   2  19    0.14    0.41   9
  -7  -3  11   35.68    0.71   9
  -7  -3  12  134.60    1.12   9
  -7  -3  13  120.46    1.06   9
 -11   2  12   58.06    0.95   9
 -11   2  13  162.71    1.41   9
 -11   2  14    2.88    0.68   9
 -11   3  11   65.90    1.02   9
 -11   4  10    4.22    0.59   9
 -11   5  10   21.84    0.77   9
 -11   6  10    1.07    0.51   9
 -11   8  12   62.20    0.80   9
 -11   8  14   16.57    0.58   9
 -11   8  15   10.78    0.45   9
 -10   0  12  391.70    1.90   9
 -10   2  17   30.80    0.81   9
 -10   3   8    3.55    0.53   9
 -10  10  14    5.77    0.34   9
  -9  -1  10  114.76    1.00   9
  -9  -1  14   83.86    1.12   9
  -9   6  19   16.54    0.38   9
  -8  -2  10    6.29    0.46   9
  -8  -2  14   17.01    0.71   9
  -7  -1  17    0.22    0.45   9
 -11   3  12   64.92    1.03   9
 -11   3  15   -0.10    0.63   9
 -11   4  16   -0.01    0.57   9
 -11   5  16   27.01    0.73   9
 -11   6  16   25.89    0.69   9
 -11   7  11    5.23    0.51   9
 -11   7  15   18.84    0.63   9
 -10   1  10   71.28    0.88   9
 -10   2   9   -0.25    0.53   9
 -10   5  18    9.05    0.45   9
 -10   6  18   29.77    0.50   9
 -10   8  17    5.11    0.35   9
 -10   9  16    2.18    0.34   9
  -9  -1  11    1.90    0.49   9
  -9  -1  12    6.31    0.70   9
  -9  -1  13    4.96    0.74   9
  -9   2  18    0.11    0.55   9
  -9   5  19    2.09    0.31   9
  -8  -2  11    0.17    0.47   9
  -8  -2  12   20.95    0.71   9
  -8  -2  13    4.07    0.57   9
  -8   1  18    2.43    0.58   9
  -7  -2  15   39.59    0.79   9
  -7   2  19    3.38    0.39   9
  -6  -3  13   32.36    0.68   9
  -6   0  18    4.07    0.45   9
 -11   3  13   18.68    0.78   9
 -11   4  11    6.28    0.61   9
 -11   5  11    6.87    0.65   9
 -11   6  11   65.63    0.87   9
 -11   6  15   98.26    1.01   9
 -11   7  12    6.62    0.62   9
 -11   7  14   68.41    0.89   9
 -10   1  11   18.74    0.78   9
 -10   1  15    3.30    0.65   9
 -10   3  17   30.26    0.78   9
 -10   4   8  200.88    1.22   9
 -10   5   8   25.77    0.65   9
  -9   0   9   64.27    0.75   9
  -9   1  17    7.10    0.58   9
  -9   8  18    7.61    0.28   9
  -8   3  19   17.94    0.44   9
  -8   7  19    4.99    0.26   9
 -11   4  12    8.51    0.69   9
 -11   4  13   58.17    0.92   9
 -11   4  14   -0.23    0.63   9
 -11   5  12    7.55    0.70   9
 -11   5  15    5.22    0.63   9
 -11   6  12    9.70    0.63   9
 -11   6  13    8.85    0.69   9
 -10   1  12  327.01    1.75   9
 -10   1  13   99.33    1.18   9
 -10   2  10   52.34    0.84   9
 -10   3   9    6.15    0.62   9
  -9   9  17   -0.12    0.27   9
  -9  10  16   -0.20    0.23   9
  -8  -1  15    6.47    0.62   9
  -8   4  19   -0.01    0.36   9
  -7  -1  16  134.47    1.16   9
  -6  -3  11  601.61    1.93   9
  -6  -3  12    8.24    0.43   9
  -6  -2  15   83.13    0.92   9
  -6   2  19    4.49    0.37   9
 -11   5  13   69.55    0.97   9
 -10   2  15  192.51    1.48   9
 -10   6  17    1.77    0.43   9
 -10   7   9   25.11    0.66   9
 -10   9  14    4.44    0.46   9
  -9   1  16    8.45    0.79   9
  -9   2  17    7.42    0.70   9
  -9   7  18   20.77    0.43   9
  -8  -1  14    4.03    0.73   9
  -8   2  18    3.45    0.56   9
  -8   5  19   27.07    0.45   9
  -8   6  19   20.48    0.35   9
  -8   6  19    5.29    0.20   9
  -8  10  17    0.24    0.20   9
  -7  -2  13  240.29    1.42   9
  -7   1  18   22.36    0.58   9
  -7   3  19    0.22    0.38   9
 -10   2  11   88.74    0.99   9
 -10   2  14   27.49    0.90   9
 -10   3  10   28.16    0.72   9
 -10   4   9    1.70    0.47   9
 -10   5   9   96.34    0.99   9
 -10   6   9    3.01    0.58   9
 -10   9  12   42.87    0.68   9
 -10   9  13    5.53    0.52   9
  -9   0  11    8.62    0.54   9
  -9   0  13    5.64    0.66   9
  -9   1   9   41.74    0.68   9
  -8  -1  10    3.91    0.39   9
  -8   0  16   30.93    0.75   9
  -7  -2  12   43.64    0.76   9
  -7   7  19    0.49    0.21   9
 -10   2  12  259.58    1.56   9
 -10   2  13   15.40    0.72   9
 -10   3  15   50.79    0.98   9
 -10   5  16   12.32    0.69   9
 -10   6  16    1.42    0.58   9
 -10   8  11    3.35    0.53   9
 -10   8  15    0.85    0.42   9
  -9   1  15   97.68    1.16   9
  -9   3  17   -0.24    0.62   9
  -9   4   7  101.24    0.81   9
  -9   8  17    9.87    0.42   9
  -8  -1  11   73.69    0.81   9
  -8  -1  12    3.20    0.49   9
  -8  -1  13   58.17    0.84   9
  -8   3  18    0.43    0.51   9
  -8   8  18    3.33    0.29   9
  -8  11  15   22.75    0.37   9
  -7  -1  15   24.39    0.75   9
  -7   4  19    8.43    0.35   9
  -7   5  19    5.02    0.34   9
  -7   6  19    1.10    0.27   9
  -6  -2  14   59.30    0.84   9
  -6  -1  16    1.63    0.46   9
  -6   1  18    4.65    0.42   9
  -6   3  19   34.96    0.50   9
  -5   3  19    1.29    0.30   9
 -10   3  11    9.52    0.59   9
 -10   3  14   51.23    0.96   9
 -10   4  10   34.16    0.72   9
 -10   4  15    0.84    0.72   9
 -10   5  10   19.26    0.70   9
 -10   7  10    7.01    0.52   9
 -10   7  15    1.42    0.56   9
 -10   8  14   11.56    0.61   9
  -9   1  10  115.22    0.98   9
  -9   2  16   11.76    0.68   9
  -9   5   7    4.65    0.38   9
  -9   9  16   21.86    0.45   9
  -9  10  14    3.55    0.41   9
  -7   2  18    0.60    0.48   9
  -6   4  19    0.15    0.34   9
  -6   7  19    0.83    0.20   9
  -5   1  18   10.53    0.46   9
 -10   3  12   25.19    0.73   9
 -10   3  13  156.68    1.27   9
 -10   4  11    2.26    0.62   9
 -10   7  11   22.07    0.72   9
  -9   1  11    1.14    0.49   9
  -9   1  13    5.14    0.74   9
  -9   1  14   83.09    1.01   9
  -9   2   9  136.72    1.00   9
  -9   3   8  605.07    1.90   9
  -9   4  17   12.07    0.59   9
  -9   6  17   87.24    0.88   9
  -9   7  17    1.03    0.38   9
  -9  10  13    8.22    0.46   9
  -8   1  16    7.32    0.74   9
  -8   4  18    5.42    0.47   9
  -8   7  18   11.12    0.38   9
  -8   9  17    0.63    0.29   9
  -8  10  16   17.60    0.39   9
  -7  -1  14  253.99    1.50   9
  -7  10  17    1.37    0.22   9
  -7  11  16    0.85    0.19   9
  -6  -2  13   11.05    0.59   9
  -6   5  19    1.25    0.30   9
  -6   6  19    2.60    0.26   9
  -5   0  17   14.80    0.55   9
  -5   4  19   16.71    0.39   9
 -10   4  12    9.94    0.66   9
 -10   4  13    1.26    0.59   9
 -10   5  11   21.28    0.68   9
 -10   5  14    3.27    0.70   9
 -10   6  14   39.83    0.86   9
 -10   7  12    0.43    0.62   9
 -10   7  13    2.23    0.61   9
  -9   1  12    7.13    0.59   9
  -9   2  15   19.59    0.72   9
  -9   4   8   43.39    0.66   9
  -9   8  16    1.81    0.46   9
  -9   9  15    4.17    0.50   9
  -9  10  12    1.66    0.43   9
  -8   0  14  334.91    1.70   9
  -8   6  18   41.43    0.58   9
  -7   3  18    2.67    0.54   9
  -6  -2  12   46.10    0.72   9
  -6  -1  15   12.39    0.63   9
  -6   2  18   22.17    0.60   9
  -5   7  19   -0.04    0.18   9
  -4   4  19    0.16    0.24   9
 -10   5  12   10.38    0.66   9
 -10   5  13   72.77    0.94   9
 -10   6  12    6.54    0.60   9
  -9   2  10  144.64    1.05   9
  -9   2  14  109.90    1.17   9
  -9   3   9   35.50    0.68   9
  -9   6   8   10.20    0.50   9
  -8   0  12   38.14    0.74   9
  -8   1  15    6.12    0.71   9
  -8   3  17   29.70    0.70   9
  -7  -1  13   19.19    0.64   9
  -7   8  18    2.20    0.23   9
  -6  -2  11   24.58    0.52   9
  -6   0  16  249.42    1.43   9
  -6   9  18    0.45    0.17   9
  -6   9  18    0.15    0.10   9
  -5   2  18    4.95    0.45   9
  -5   5  19    0.44    0.25   9
  -5   6  19    0.52    0.21   9
  -4   5  19    1.04    0.21   9
  -4   6  19    3.01    0.20   9
  -9   2  11   83.07    0.89   9
  -9   2  12  451.57    1.94   9
  -9   2  13  130.73    1.15   9
  -9   6  16    1.27    0.59   9
  -9   7  16   14.62    0.54   9
  -8   8  17    0.07    0.35   9
  -8  10  15    3.12    0.39   9
  -7  -1  11  144.45    1.02   9
  -7   0  15    8.11    0.63   9
  -7   1  16  136.62    1.19   9
  -7   4  18   20.64    0.53   9
  -7   7  18    2.28    0.35   9
  -4   2  18   23.10    0.50   9
  -9   3  10   28.36    0.60   9
  -9   3  14    7.87    0.76   9
  -9   4   9   12.41    0.50   9
  -9   4  15   94.76    1.12   9
  -9   7   9    5.23    0.52   9
  -9   9  11   24.39    0.55   9
  -9   9  13   42.70    0.68   9
  -8   1  14    3.69    0.62   9
  -8   4  17    2.22    0.53   9
  -8   5  17   16.28    0.65   9
  -8   9  16   16.38    0.44   9
  -7   5  18   22.05    0.52   9
  -7   6  18    6.36    0.40   9
  -7   9  17   -0.27    0.30   9
  -7  11  15    2.16    0.30   9
  -6  -1  14   80.17    0.86   9
  -6   3  18    8.64    0.48   9
  -6   8  18    3.07    0.29   9
  -6  10  17    0.28    0.21   9
  -6  11  16    5.63    0.24   9
  -5   1  17    0.07    0.50   9
  -5   9  18    1.37    0.17   9
  -9   3  11   14.66    0.57   9
  -9   3  12  740.41    2.42   9
  -9   5   9    9.34    0.47   9
  -9   5  15    1.77    0.57   9
  -9   6   9   74.29    0.85   9
  -9   7  15    1.27    0.53   9
  -9   8  10   47.32    0.70   9
  -8   1  10    4.55    0.41   9
  -8   1  13   57.36    0.89   9
  -8   2  15  109.07    1.15   9
  -8   3  16    2.48    0.61   9
  -7  10  16    1.82    0.31   9
  -6   4  18   59.90    0.73   9
  -5  -2  12   25.71    0.52   9
  -5   3  18   72.76    0.76   9
  -9   4  10   10.41    0.52   9
  -9   4  14    0.62    0.58   9
  -9   7  10  156.25    1.15   9
  -9   8  11   44.43    0.77   9
  -8   1  11   76.52    0.82   9
  -8   1  12    3.45    0.49   9
  -8  10  14    9.41    0.43   9
  -7   1  15   27.00    0.80   9
  -7   8  17   45.39    0.62   9
  -6  -1  13  150.75    1.07   9
  -6   5  18    7.25    0.48   9
  -6   7  18    2.56    0.37   9
  -4   0  16   39.11    0.67   9
  -4   1  17    4.10    0.46   9
  -4   3  18   15.55    0.47   9
  -9   4  11    3.94    0.50   9
  -9   4  12   16.96    0.63   9
  -9   4  13   70.66    0.94   9
  -9   5  10   79.13    0.86   9
  -9   5  11   56.00    0.84   9
  -9   5  13    3.63    0.68   9
  -9   5  14   42.84    0.80   9
  -9   6  10   44.02    0.70   9
  -9   7  11   22.22    0.74   9
  -9   7  13   15.35    0.72   9
  -8   2   9    1.34    0.32   9
  -8   2  14   16.20    0.66   9
  -8   3  15   22.52    0.82   9
  -8   7  16    9.80    0.59   9
  -8   9  15   24.16    0.53   9
  -8  10  13   27.14    0.63   9
  -7   0  11    5.61    0.47   9
  -7   4  17    2.62    0.52   9
  -7  11  14   19.17    0.46   9
  -6  -1  12  116.38    0.93   9
  -6   6  18    2.03    0.37   9
  -6  12  14    8.26    0.31   9
  -5   4  18   10.95    0.51   9
  -5   8  18    0.12    0.24   9
  -5  10  17    3.43    0.24   9
  -5  12  15    1.08    0.19   9
  -9   5  12    6.24    0.56   9
  -9   6  11    6.79    0.59   9
  -9   6  12   77.70    0.92   9
  -9   6  13   16.71    0.64   9
  -9   7  12    4.30    0.55   9
  -8   2  10    5.95    0.43   9
  -8   2  13    5.44    0.61   9
  -8   6   7    7.89    0.37   9
  -8   6  16   24.54    0.64   9
  -8  10  12    7.60    0.50   9
  -7   1  14  254.27    1.50   9
  -7   5  17    2.00    0.50   9
  -7   6  17   34.72    0.69   9
  -7   7  17    2.43    0.43   9
  -7   9  16   22.42    0.53   9
  -7  10  15   32.38    0.55   9
  -6   0  14  136.44    1.14   9
  -6   9  17    2.19    0.30   9
  -5   5  18   51.33    0.64   9
  -5   7  18    8.59    0.37   9
  -5  11  16    6.76    0.26   9
  -4   4  18   66.39    0.68   9
  -4   8  18    0.84    0.22   9
  -8   2  11    0.55    0.44   9
  -8   2  12   22.18    0.61   9
  -8   3  14    1.58    0.62   9
  -8   9  14    1.98    0.45   9
  -7   2  15   40.79    0.85   9
  -7   3  16    4.46    0.60   9
  -7  11  13    6.87    0.46   9
  -6  10  16    4.90    0.34   9
  -6  11  15    2.30    0.33   9
  -6  12  13    7.19    0.35   9
  -5  -1  13   62.20    0.80   9
  -5   0  15   36.54    0.69   9
  -5   6  18    0.45    0.32   9
  -4  -1  14   11.25    0.53   9
  -4  10  17    5.56    0.24   9
  -3   4  18    2.68    0.34   9
  -3   8  18    7.84    0.21   9
  -3   8  18    2.45    0.12   9
  -8   3  13   92.70    1.05   9
  -8   5   8   31.89    0.59   9
  -8   5  15    9.29    0.62   9
  -8   7   8    6.77    0.46   9
  -8   9  10   58.34    0.79   9
  -7   1  13   18.06    0.59   9
  -7   8  16   46.34    0.71   9
  -7  11  12   33.64    0.58   9
  -6   2  16   37.98    0.75   9
  -6   8  17   -0.37    0.35   9
  -5   9  17   -0.31    0.31   9
  -4   2  17   20.65    0.54   9
  -4   5  18    0.15    0.33   9
  -4   6  18    3.52    0.35   9
  -3   2  17    8.03    0.47   9
  -3   5  18    3.57    0.35   9
  -3   7  18    2.43    0.25   9
  -2   5  18    1.12    0.26   9
  -2   6  18    1.92    0.23   9
  -2   7  18    4.27    0.22   9
  -8   3  10   28.69    0.56   9
  -8   3  11  194.35    1.20   9
  -8   3  12  374.74    1.67   9
  -8   4   9    1.37    0.42   9
  -8   4  14   26.99    0.72   9
  -8   6   8   31.50    0.53   9
  -8   8   9    1.63    0.47   9
  -8   9  11   92.01    0.92   9
  -8   9  12    2.43    0.49   9
  -7   1  10  296.95    1.32   9
  -7   1  12   84.92    0.85   9
  -7   2  14    8.84    0.73   9
  -7   3  15   44.38    0.87   9
  -7  10  14    4.60    0.50   9
  -5  12  14    2.20    0.28   9
  -4   1  16   40.02    0.72   9
  -4  11  16   -0.15    0.18   9
  -3   6  18    7.54    0.31   9
  -8   4  10   37.44    0.66   9
  -8   4  13    2.03    0.56   9
  -8   5  14   15.60    0.66   9
  -8   6  14  107.92    1.03   9
  -8   7   9  144.93    1.05   9
  -8   7  14   18.52    0.66   9
  -8   8  10   74.17    0.86   9
  -8   8  13   12.35    0.60   9
  -6   0  12   84.36    0.83   9
  -6   1  14   76.90    0.94   9
  -6   9  16    0.44    0.39   9
  -6  11  14   26.76    0.53   9
  -5   2  16   46.79    0.85   9
  -5   4  17   40.80    0.73   9
  -5   8  17    3.35    0.39   9
  -5  10  16   11.52    0.39   9
  -4  -1  13  151.56    1.03   9
  -4   3  17   61.91    0.79   9
  -4  13  13    7.12    0.28   9
  -8   4  11  155.89    1.09   9
  -8   4  12  379.29    1.69   9
  -8   5  10   58.63    0.77   9
  -8   5  13  139.91    1.14   9
  -8   6  13    2.32    0.64   9
  -8   7  10   10.84    0.57   9
  -8   8  11    1.13    0.48   9
  -7   2  13  231.93    1.35   9
  -7   4  15    4.14    0.58   9
  -7   8  15   51.95    0.80   9
  -7  10  13    1.86    0.52   9
  -6  10  15    0.78    0.35   9
  -5   1  15    0.55    0.55   9
  -3   3  17    0.03    0.44   9
  -3  11  16    5.42    0.22   9
  -3  12  15    1.28    0.18   9
  -8   5  11   17.18    0.57   9
  -8   5  12   16.01    0.63   9
  -8   6  10  161.27    1.09   9
  -8   6  12    6.22    0.58   9
  -8   7  11   40.96    0.71   9
  -8   7  12   25.72    0.65   9
  -7   2  12   45.08    0.69   9
  -7   5  15   88.44    0.97   9
  -7   6  15    5.43    0.68   9
  -7   9  14   25.03    0.59   9
  -6   1  13  146.54    1.11   9
  -6   4  16   55.29    0.82   9
  -6   8  16   30.11    0.60   9
  -5   0  13  316.47    1.48   9
  -5   7  17    0.22    0.39   9
  -3   9  17    2.32    0.25   9
  -2   3  17   20.98    0.52   9
  -2   9  17    4.72    0.24   9
  -7   2  11  227.00    1.23   9
  -7   3  13  116.02    1.07   9
  -7   4  14    1.94    0.64   9
  -7  10  10  140.98    1.00   9
  -7  10  11   38.31    0.64   9
  -6   2  14   58.87    0.89   9
  -6   3  15  165.72    1.27   9
  -6   6  16    3.99    0.55   9
  -6   9  15   59.88    0.78   9
  -6  11  13    8.41    0.43   9
  -5   3  16   13.38    0.58   9
  -4  -1  12    1.32    0.35   9
  -4   0  14   10.00    0.51   9
  -4   1  15   47.77    0.81   9
  -4   2  16   44.39    0.71   9
  -4   5  17   65.79    0.78   9
  -4   8  17   22.76    0.44   9
  -7   3  12  137.66    1.08   9
  -7   7  14   46.38    0.84   9
  -6   1  12  122.08    0.94   9
  -6  11  12   51.93    0.70   9
  -5   1  14  180.58    1.19   9
  -4   6  17   -0.16    0.41   9
  -4  11  15    3.14    0.32   9
  -4  13  12   -0.07    0.26   9
  -3   4  17   95.80    0.83   9
  -3   8  17    7.13    0.33   9
  -3  13  13    1.33    0.22   9
  -2   4  17    5.19    0.46   9
   0   7  17    2.14    0.21   9
  -7   3  11   37.38    0.62   9
  -7   6  14   41.10    0.79   9
  -7   8   8   14.69    0.52   9
  -7   8  13   12.10    0.73   9
  -7   9   9    3.39    0.42   9
  -7   9  10  102.26    0.93   9
  -7   9  12   21.31    0.63   9
  -6   2  13   10.42    0.62   9
  -6   8  15   57.66    0.83   9
  -5   0  11    9.53    0.45   9
  -5   4  16    5.06    0.57   9
  -5   8  16    0.63    0.43   9
  -5  10  15   14.74    0.46   9
  -5  11  14   70.85    0.68   9
  -5  12  12    9.40    0.45   9
  -4   3  16    0.93    0.56   9
  -3   1  15    8.59    0.55   9
  -3   5  17    2.48    0.41   9
  -3   6  17   14.40    0.49   9
  -3  10  16    2.88    0.31   9
  -2   8  17   -0.16    0.19   9
  -2   8  17   -0.13    0.12   9
  -1   5  17    2.20    0.34   9
   0   6  17    3.08    0.21   9
  -7   4  12    8.23    0.59   9
  -7   5  13   25.73    0.68   9
  -7   6  13  299.43    1.59   9
  -7   7   8   42.60    0.60   9
  -7   7  13   39.07    0.81   9
  -6   3  14    7.91    0.57   9
  -6   5  15   13.26    0.62   9
  -6   6  15   22.22    0.76   9
  -6   9  14    2.45    0.60   9
  -6  10  13    1.96    0.53   9
  -6  11  10    0.45    0.43   9
  -5   1  13   59.66    0.81   9
  -5   3  15    2.18    0.62   9
  -5   7  16   14.58    0.56   9
  -2   5  17   50.68    0.61   9
  -2   6  17    0.43    0.36   9
  -2   7  17    1.68    0.30   9
  -2  10  16    1.15    0.26   9
  -1   7  17    1.68    0.26   9
  -1  10  16    0.78    0.21   9
  -7   4  10   47.62    0.62   9
  -7   4  11  217.65    1.22   9
  -7   5  12  207.22    1.33   9
  -7   7  12   15.90    0.69   9
  -7   8   9   93.78    0.83   9
  -7   8  10   19.99    0.63   9
  -7   8  12    8.51    0.54   9
  -6   2  12   47.26    0.67   9
  -5   2  14   24.27    0.63   9
  -5   9  15    6.04    0.54   9
  -5  11  13    0.45    0.48   9
  -5  12  11   57.55    0.67   9
  -4   2  15   15.05    0.60   9
  -4  12  13   -0.24    0.38   9
  -3  11  15    0.61    0.22   9
  -3  11  15    0.09    0.14   9
  -3  12  14    2.85    0.23   9
  -3  12  14    1.40    0.15   9
  -2   1  15   11.68    0.55   9
  -2  13  13    1.61    0.22   9
  -7   5   9    0.28    0.33   9
  -7   5  10  157.83    1.06   9
  -7   5  11    1.48    0.42   9
  -7   6   9  236.03    1.22   9
  -7   6  12    1.28    0.50   9
  -7   7   9    0.05    0.37   9
  -7   7  10   27.38    0.68   9
  -7   7  11   84.26    0.93   9
  -6   2  11   24.39    0.51   9
  -6   3  13   33.70    0.67   9
  -6   4  14  216.05    1.35   9
  -5   1  12  302.70    1.41   9
  -5   4  15   66.50    0.92   9
  -5  10  14   15.37    0.51   9
  -4   0  12  200.14    1.13   9
  -4   7  16    3.59    0.54   9
  -4   8  16    2.35    0.43   9
  -4  10  15    7.72    0.41   9
  -4  11  14    4.21    0.42   9
  -3   9  16    1.26    0.35   9
  -2  11  15   11.29    0.34   9
  -7   6  10    6.93    0.45   9
  -6   5  14    8.69    0.62   9
  -6   7  14    7.04    0.57   9
  -6   9  13    5.34    0.56   9
  -6  10   9   16.60    0.56   9
  -5   5  15   58.21    0.91   9
  -4   3  15   38.98    0.81   9
  -4   6  16   67.68    0.81   9
  -3   0  13  171.77    1.05   9
  -3   2  15   24.97    0.69   9
  -2   9  16   29.66    0.50   9
  -2  12  14   12.25    0.33   9
  -1   3  16    1.44    0.38   9
  -1  11  15    0.69    0.23   9
   0   9  16    0.20    0.21   9
   2   6  16    5.79    0.25   9
  -6   3  12    9.08    0.48   9
  -6   4  13  112.51    1.02   9
  -6   8  13   20.04    0.70   9
  -6   9  12    9.97    0.64   9
  -6  10  10  127.67    0.98   9
  -5   1  11   42.52    0.58   9
  -5   2  13   84.09    0.85   9
  -5   3  14   53.94    0.79   9
  -5   9  14   99.09    0.98   9
  -4   1  13  159.48    1.06   9
  -4   2  14   38.32    0.79   9
  -4   9  15   18.63    0.59   9
  -4  12  12   13.68    0.48   9
  -3   1  14   18.79    0.53   9
  -3   5  16   51.33    0.79   9
  -3   7  16   57.10    0.76   9
  -3   8  16   24.72    0.53   9
  -3  10  15    4.17    0.43   9
  -2   4  16    5.96    0.57   9
  -1   9  16    1.73    0.26   9
  -1  12  14    1.88    0.24   9
  -1  14  11   14.48    0.30   9
   0   4  16   22.77    0.51   9
   1   8  16   -0.07    0.22   9
  -6   3  10   48.85    0.64   9
  -6   3  11  629.11    1.93   9
  -6   4  12  169.52    1.17   9
  -6   5  13    8.65    0.60   9
  -6   7  13  259.29    1.45   9
  -5  10  13    6.54    0.49   9
  -4  10  14  152.91    1.06   9
  -3   6  16    0.68    0.46   9
  -3  11  14   71.03    0.70   9
  -3  12  13    4.37    0.36   9
  -3  13  11    0.60    0.36   9
  -2   2  15    3.11    0.46   9
  -2   8  16    2.14    0.36   9
   0  12  14    2.79    0.21   9
   1   6  16   15.16    0.38   9
   1   7  16    0.74    0.27   9
  -6   8  12    4.53    0.56   9
  -6   9   9    6.32    0.54   9
  -6   9  10  132.69    1.06   9
  -5   2  12   26.76    0.54   9
  -5   5  14   76.08    0.96   9
  -5  11  10   20.74    0.58   9
  -4   5  15    3.72    0.65   9
  -4   8  15   18.66    0.60   9
  -4  11  13    2.62    0.41   9
  -4  12  11    9.60    0.51   9
  -3   3  15    5.19    0.55   9
  -2   1  14    0.22    0.40   9
  -2   5  16    1.76    0.44   9
  -2   6  16   94.00    0.88   9
  -2  10  15    0.13    0.32   9
  -2  13  12    1.61    0.31   9
  -1   2  15   27.58    0.56   9
  -1   5  16   23.90    0.62   9
  -1   8  16   13.40    0.40   9
   0   5  16   16.37    0.48   9
   0   7  16    0.98    0.33   9
  -6   4  10   96.63    0.82   9
  -6   4  11   11.06    0.46   9
  -6   5  12   27.26    0.63   9
  -6   6  12  213.12    1.29   9
  -6   7  12   10.42    0.56   9
  -6   8   8   35.49    0.60   9
  -6   8  11   62.12    0.85   9
  -5   2  11  123.47    0.91   9
  -5   6  14    0.96    0.54   9
  -5   7  14    9.21    0.59   9
  -5   9  13    2.88    0.54   9
  -5  11   9   20.95    0.52   9
  -4   1  12    0.89    0.36   9
  -4   2  13   92.02    0.92   9
  -4   3  14   38.89    0.74   9
  -4   6  15    6.59    0.58   9
  -3   1  13   53.16    0.75   9
  -3   9  15   26.54    0.56   9
  -2  11  14    0.19    0.38   9
  -1   1  14   11.93    0.55   9
  -1   6  16    2.92    0.38   9
  -1   7  16   35.25    0.54   9
  -1  10  15    2.17    0.35   9
   0   6  16    9.50    0.40   9
   1  10  15   16.73    0.31   9
  -6   5  11   69.43    0.76   9
  -6   6  11   10.81    0.60   9
  -6   7  11    3.14    0.49   9
  -6   8  10   32.45    0.64   9
  -5   3  12    6.52    0.50   9
  -5   4  13    4.52    0.51   9
  -4   9  14    4.12    0.49   9
  -4  11  12   48.23    0.76   9
  -3   4  15   39.69    0.74   9
  -3   8  15   98.58    0.96   9
  -3  10  14    6.26    0.52   9
  -3  12  12    2.67    0.45   9
  -2   9  15    2.52    0.47   9
  -2  12  13    1.72    0.32   9
  -1  13  12    1.99    0.30   9
  -6   5   9   41.73    0.55   9
  -6   5  10   67.07    0.70   9
  -6   6   8   72.12    0.66   9
  -6   6   9    4.61    0.44   9
  -6   6  10   37.67    0.60   9
  -6   7   9  164.13    1.02   9
  -6   7  10    9.62    0.48   9
  -5   5  13   31.66    0.68   9
  -5   7  13   46.37    0.83   9
  -5   8  13  169.24    1.21   9
  -5   9  12    3.03    0.65   9
  -5  10  11   37.79    0.70   9
  -4   4  14   55.43    0.80   9
  -2   0  12  362.86    1.42   9
  -2   2  14   19.09    0.62   9
  -2   4  15   -0.02    0.54   9
  -2  13  11   29.53    0.52   9
  -1   3  15    1.09    0.44   9
  -1  11  14   11.69    0.42   9
   2   4  15   -0.08    0.34   9
   2  11  14    1.17    0.16   9
   3   6  15    9.10    0.31   9
   3   7  15    1.24    0.23   9
  -5   3  11    2.97    0.36   9
  -5   4  12  249.21    1.34   9
  -5   6  13   20.36    0.64   9
  -5  10   9   35.69    0.69   9
  -5  10  10   37.71    0.66   9
  -4   2  12  100.87    0.88   9
  -4   3  13   77.63    0.84   9
  -4   5  14   27.18    0.68   9
  -4   6  14   22.39    0.76   9
  -4   7  14   10.41    0.70   9
  -3   3  14   72.87    0.84   9
  -2   1  13   36.66    0.66   9
  -2   8  15    3.15    0.52   9
  -1  12  13   20.12    0.41   9
   0   9  15    2.75    0.39   9
   0  11  14   16.22    0.40   9
   0  13  12    0.72    0.27   9
   2   8  15    0.25    0.28   9
  -5   5  12   45.36    0.76   9
  -5   8  12   85.95    0.92   9
  -5   9  11  107.28    0.98   9
  -4   9  13   54.44    0.81   9
  -3   1  12  127.42    0.90   9
  -3   2  13   76.11    0.81   9
  -3   9  14   38.02    0.69   9
  -2   7  15   19.91    0.59   9
  -2  10  14   47.34    0.67   9
  -2  12  12   35.44    0.61   9
  -1   8  15   12.08    0.54   9
   0  12  13    0.99    0.30   9
   0  14  10    9.71    0.30   9
   1   4  15   69.33    0.75   9
   1  12  13    8.58    0.30   9
   2   5  15   39.43    0.58   9
   3  10  14    0.90    0.19   9
  -5   4  11  335.53    1.44   9
  -5   7  12   70.29    0.87   9
  -4   2  11   36.28    0.58   9
  -4   4  13    1.34    0.48   9
  -4   8  13   18.52    0.73   9
  -3   4  14    1.72    0.53   9
  -3  10  13   27.47    0.69   9
  -3  11  12   18.45    0.61   9
  -2   3  14    3.94    0.60   9
  -2  13  10    5.43    0.43   9
  -1   1  13   35.97    0.65   9
  -1   7  15    1.39    0.51   9
  -1  10  14   11.69    0.52   9
   0   2  14    5.01    0.53   9
   0   8  15    0.68    0.38   9
   1   5  15   12.95    0.53   9
   1   8  15    1.29    0.32   9
   2   6  15    7.56    0.40   9
   2   7  15   31.98    0.47   9
  -5   5  11    6.22    0.49   9
  -5   7  11    4.78    0.57   9
  -5   8  11   20.23    0.62   9
  -5   9   8   34.11    0.60   9
  -5   9   9    2.81    0.41   9
  -4   5  13    8.55    0.55   9
  -4   7  13    5.85    0.67   9
  -4  11   9   16.67    0.59   9
  -3   5  14    9.58    0.57   9
  -3   6  14    2.98    0.65   9
  -3  12  10    0.48    0.41   9
  -2   9  14    6.98    0.52   9
  -1   6  15   24.79    0.61   9
   0   5  15   87.90    0.85   9
   0   6  15   24.18    0.61   9
   0   7  15   44.14    0.63   9
   0  10  14   10.67    0.47   9
   1   6  15  123.14    0.93   9
   1   7  15   37.00    0.54   9
   1  14  10    0.50    0.23   9
   2  10  14    0.87    0.24   9
   4   8  14    3.49    0.24   9
  -5   6  11    9.68    0.48   9
  -5   8   7   66.33    0.67   9
  -5   8  10   81.85    0.84   9
  -4   6  13    2.65    0.53   9
  -4   9  12   52.94    0.79   9
  -4  10  11    1.13    0.50   9
  -3   2  12    1.81    0.45   9
  -2   1  12    5.80    0.39   9
  -2   2  13    3.06    0.46   9
  -2   4  14   28.56    0.73   9
  -2  12  11   -0.10    0.50   9
  -2  13   9   42.24    0.62   9
  -1   3  14    3.03    0.47   9
  -1  12  12    0.36    0.42   9
   0  14   9   16.54    0.42   9
   2  14  10    1.90    0.21   9
   3   9  14    2.52    0.27   9
  -5   5   9   44.96    0.59   9
  -5   5  10   71.37    0.70   9
  -5   6  10    8.27    0.41   9
  -5   7  10    4.51    0.42   9
  -5   8   8    0.97    0.34   9
  -5   8   9    4.84    0.42   9
  -4   3  11  330.08    1.39   9
  -4   4  12   48.03    0.70   9
  -4   8  12   11.00    0.66   9
  -4  10  10   17.00    0.69   9
  -3   4  13  108.04    1.03   9
  -2   5  14   21.82    0.71   9
  -2  10  13   38.46    0.68   9
  -2  11  12   28.55    0.67   9
  -1   9  14   57.33    0.74   9
  -1  13  10   38.01    0.58   9
   0   3  14    0.17    0.51   9
   0  11  13   25.93    0.55   9
   0  13  11   14.57    0.40   9
   1   3  14    9.33    0.52   9
   3   4  14    1.46    0.37   9
   3  11  13   16.41    0.29   9
   4   7  14    2.54    0.29   9
  -5   6   9   91.42    0.77   9
  -5   7   8  107.15    0.80   9
  -5   7   9    1.73    0.37   9
  -4   6  12  107.77    1.02   9
  -4   7  12  354.97    1.65   9
  -3   8  13    7.36    0.57   9
  -2   6  14    4.69    0.53   9
  -1   2  13   56.43    0.76   9
  -1   8  14   21.13    0.67   9
   0   9  14   36.10    0.61   9
   0  12  12   35.73    0.52   9
   1  11  13    2.45    0.34   9
   1  13  11    0.74    0.32   9
   2   9  14    5.80    0.35   9
   2  11  13    2.95    0.28   9
   3   8  14    2.83    0.33   9
   3  12  12    0.79    0.23   9
   3  13  11   -0.00    0.19   9
   5   9  13    0.70    0.19   9
  -4   8  11  102.86    1.02   9
  -4  10   8    5.17    0.49   9
  -4  10   9   42.17    0.67   9
  -3   2  11  132.21    0.89   9
  -3   6  13   19.78    0.64   9
  -3   7  13   90.18    0.97   9
  -3   9  12  116.29    1.09   9
  -3  11  10  206.09    1.27   9
  -2   1  11   48.56    0.62   9
  -2  12  10  109.24    0.94   9
  -1   1  12  162.22    1.00   9
  -1   5  14    4.14    0.55   9
   0   4  14    2.81    0.56   9
   1  12  12    7.83    0.37   9
   2   4  14   90.19    0.86   9
   2  12  12    7.35    0.35   9
   2  13  11    5.49    0.27   9
   3   5  14   27.24    0.56   9
   3   7  14   10.09    0.44   9
  -4   5  11  152.90    1.06   9
  -4   7  11   34.69    0.71   9
  -3  10  11   25.37    0.67   9
  -2   2  12    3.69    0.41   9
  -2   4  13    6.76    0.60   9
  -1   6  14    9.44    0.58   9
  -1  11  12   98.49    0.89   9
  -1  13   9    1.36    0.46   9
   0   2  13   11.47    0.50   9
   0   5  14    0.62    0.58   9
   0   8  14   76.22    0.83   9
   0  13  10   12.25    0.47   9
   1   8  14   11.70    0.48   9
   2   5  14    3.73    0.51   9
   3   6  14    0.92    0.36   9
  -4   4  10   95.56    0.77   9
  -4   6  11   88.00    0.85   9
  -4   8  10    9.20    0.58   9
  -3   4  12   87.28    0.85   9
  -3  11   9    3.72    0.48   9
  -2   5  13   97.13    1.04   9
  -1   3  13    1.77    0.46   9
   0  10  13   -0.12    0.44   9
   1   6  14    1.75    0.55   9
   1   7  14   33.29    0.63   9
   2   6  14   23.38    0.56   9
   2   7  14    0.10    0.37   9
   2  10  13    0.69    0.41   9
   2  14   9    0.29    0.27   9
   4   9  13    3.50    0.32   9
   5  12  11    5.67    0.23   9
  -4   5  10    0.22    0.39   9
  -4   7  10   59.18    0.77   9
  -4   9   7   69.48    0.71   9
  -4   9   8   35.50    0.58   9
  -3   3  11   18.89    0.45   9
  -3   5  12   13.53    0.54   9
  -3   6  12   29.93    0.66   9
  -3   7  12   75.31    0.89   9
  -3   9  11   48.91    0.83   9
  -3  10  10   20.17    0.69   9
  -3  11   8  169.57    1.09   9
  -2   3  12   77.00    0.85   9
  -2   6  13    2.31    0.53   9
  -2   7  13    3.21    0.55   9
  -1   2  12   50.29    0.70   9
  -1  13   8   35.05    0.61   9
   0  11  12    7.68    0.49   9
   1  13  10    9.46    0.46   9
   1  14   8   11.68    0.40   9
   4  11  12    0.68    0.24   9
   5   5  13    2.29    0.33   9
   5   6  13   16.38    0.42   9
   5   7  13    2.21    0.31   9
  -4   6  10   19.33    0.49   9
  -4   8   9   26.00    0.55   9
  -2   9  12    1.78    0.56   9
  -2  11  10    2.68    0.56   9
  -2  12   8   49.13    0.67   9
  -1   8  13    7.80    0.57   9
  -1  12  10   15.12    0.56   9
   0   9  13    7.40    0.54   9
   0  13   9   11.05    0.51   9
   1   3  13    0.87    0.53   9
   1  11  12   71.78    0.79   9
   3   9  13    8.13    0.45   9
   3  11  12    4.65    0.38   9
   4   4  13    0.77    0.41   9
   4  12  11    5.78    0.30   9
   4  13  10    7.79    0.28   9
   5  10  12    2.50    0.26   9
   6   9  12    2.19    0.24   9
  -4   6   9    1.47    0.38   9
  -4   7   9   47.59    0.62   9
  -4   8   7   29.08    0.52   9
  -4   8   8   69.09    0.69   9
  -3   4  11  116.10    0.89   9
  -3  10   9   44.77    0.70   9
  -2   4  12   19.44    0.57   9
  -2   8  12  288.71    1.59   9
  -2  10  11    4.22    0.57   9
  -1   5  13    3.57    0.51   9
  -1   6  13   76.51    0.91   9
  -1   7  13    0.82    0.53   9
   0   4  13   18.15    0.70   9
   1   9  13    0.80    0.46   9
   1  12  11   23.71    0.53   9
   2   9  13   16.70    0.52   9
   2  11  12   25.11    0.52   9
   2  12  11   13.70    0.49   9
   2  13  10    0.12    0.32   9
   3  12  11    3.35    0.37   9
   3  13  10    9.10    0.35   9
  -4   7   8    7.18    0.37   9
  -3   5  11  129.77    0.97   9
  -3   6  11   24.24    0.58   9
  -3   7  11    6.86    0.51   9
  -3   9  10    2.87    0.49   9
  -3  10   8   18.64    0.60   9
  -2   5  12    3.40    0.48   9
  -2   6  12   24.26    0.72   9
  -2   7  12   58.46    0.90   9
  -2  11   9   55.35    0.84   9
  -1   3  12   18.25    0.59   9
  -1   9  12  177.38    1.31   9
   0   5  13   67.68    0.92   9
   0   7  13   36.34    0.78   9
   0  10  12  125.16    1.04   9
   0  12  10   28.72    0.66   9
   1   8  13   16.82    0.66   9
   3   8  13   10.48    0.52   9
   4   5  13    7.44    0.41   9
   5  14   8    0.05    0.18   9
   6   8  12    5.27    0.32   9
   6  12  10    7.67    0.24   9
   8   7  11    3.60    0.22   9
  -3   4  10   38.39    0.59   9
  -3   8  10   31.16    0.70   9
  -3   9   9   50.49    0.79   9
  -3  10   7   21.68    0.57   9
  -2   9  11  238.33    1.42   9
  -2  10  10  283.99    1.55   9
   0   1  11  360.77    1.40   9
   0   6  13   10.88    0.58   9
   0  11  11   18.53    0.61   9
   1   5  13   10.11    0.63   9
   1  10  12    0.62    0.56   9
   2   4  13    6.31    0.50   9
   2   8  13    1.67    0.46   9
   3   7  13    1.83    0.51   9
   3  14   8    3.47    0.32   9
   4  10  12    3.33    0.35   9
   5   9  12    5.76    0.37   9
   5  11  11    4.17    0.32   9
  -3   5  10   78.47    0.79   9
  -2  11   8   12.13    0.60   9
  -1   2  11  210.83    1.11   9
  -1   4  12   13.77    0.52   9
  -1  10  11   59.55    0.85   9
  -1  11  10  154.11    1.14   9
  -1  12   8    0.20    0.51   9
   0   3  12    6.80    0.57   9
   1   6  13    3.13    0.51   9
   2   2  12    1.91    0.46   9
   2   5  13   41.32    0.71   9
   2   7  13    2.35    0.49   9
   2  10  12   13.81    0.53   9
   3   6  13   49.88    0.71   9
   3  10  12    6.10    0.45   9
   6   5  12    0.08    0.36   9
   6   7  12    4.02    0.33   9
   7   9  11    0.96    0.24   9
   7  11  10    9.00    0.26   9
  -3   6  10   41.50    0.64   9
  -3   8   9   18.53    0.60   9
  -3   9   8    9.40    0.47   9
  -2   4  11   69.75    0.73   9
  -2   8  11   92.50    0.96   9
  -2  11   7    3.82    0.49   9
  -1   5  12  117.21    1.01   9
  -1   6  12   16.50    0.67   9
  -1   7  12  172.58    1.25   9
   1  11  11    4.26    0.51   9
   1  12  10    7.34    0.49   9
   2  13   9    4.99    0.41   9
   2  14   7    0.87    0.34   9
   4   9  12   21.10    0.56   9
   4  11  11    6.12    0.43   9
  -3   7   9   39.31    0.62   9
  -3   9   7    9.95    0.45   9
  -2   5  11   51.11    0.69   9
  -2   6  11   26.49    0.61   9
  -2   7  11   11.92    0.56   9
  -2   9  10   43.64    0.76   9
  -2  10   9   11.23    0.58   9
  -1   3  11    1.12    0.45   9
  -1   9  11    5.13    0.56   9
  -1  11   9    1.09    0.60   9
   0   2  11   -0.20    0.41   9
   0   4  12   12.80    0.60   9
   0   8  12   14.32    0.62   9
   0  10  11    4.17    0.57   9
   1   3  12   30.53    0.60   9
   1  13   8   30.40    0.65   9
   2   9  12    0.74    0.58   9
   2  12  10    3.15    0.44   9
   3   9  12    1.87    0.52   9
   3  11  11    2.71    0.42   9
   3  12  10   -0.49    0.45   9
   3  14   7   27.75    0.50   9
   4  13   9   23.79    0.43   9
   5   4  12   12.18    0.43   9
   6  14   7   -0.05    0.19   9
   7   8  11    1.66    0.31   9
   7  12   9    7.73    0.24   9
  -3   6   9  234.94    1.17   9
  -3   8   8   33.94    0.56   9
  -2   8  10   20.79    0.68   9
  -1  10  10    0.55    0.52   9
   0   5  12  126.14    1.07   9
   1   8  12   -0.27    0.63   9
   3   3  12   78.29    0.82   9
   4   8  12    5.62    0.54   9
   4  14   7    7.13    0.35   9
   5   7  12   13.81    0.48   9
   5  10  11   11.75    0.46   9
   5  14   7   12.55    0.34   9
   8   9  10    2.08    0.25   9
  -3   7   8  717.76    1.98   9
  -3   8   7  137.67    0.92   9
  -2   4  10  102.88    0.80   9
  -2   9   9  129.15    1.08   9
  -2  10   8  140.01    1.05   9
  -1   4  11   52.31    0.67   9
  -1   8  11  364.27    1.74   9
   0   9  11   29.52    0.81   9
   0  12   8   23.54    0.70   9
   1   2  11  313.40    1.40   9
   1   4  12   51.51    0.76   9
   1   7  12    3.65    0.61   9
   1  12   9   37.63    0.74   9
   2   4  12  149.18    1.16   9
   2  13   8    8.76    0.53   9
   3   8  12    0.76    0.49   9
   4   4  12   78.08    0.82   9
   6   9  11   26.50    0.47   9
   6  11  10    0.04    0.24   9
   6  11  10   -0.02    0.15   9
   6  13   8    2.80    0.28   9
   7   5  11    8.76    0.42   9
   7   6  11   35.63    0.54   9
  -2   5  10   42.88    0.61   9
  -2   6  10    8.22    0.44   9
  -2   7  10   58.14    0.75   9
  -2  10   7   11.09    0.56   9
  -1   5  11    4.47    0.44   9
  -1   6  11   55.10    0.77   9
  -1   7  11  321.36    1.60   9
  -1   9  10  226.99    1.43   9
  -1  11   8   38.69    0.69   9
   1   5  12  280.59    1.50   9
   1   6  12    7.37    0.55   9
   1  13   7    5.06    0.43   9
   2   5  12   62.39    0.88   9
   2   7  12    3.44    0.62   9
   2  10  11    2.56    0.54   9
   3   5  12   41.20    0.78   9
   3  10  11   12.65    0.56   9
   3  14   6    5.77    0.43   9
   4   6  12    1.66    0.48   9
   4  10  11    3.11    0.45   9
   6  12   9   -0.09    0.27   9
   8  12   8    1.46    0.11   9
  -1   3  10    3.88    0.34   9
  -1  10   9   27.02    0.66   9
   0  10  10  116.52    1.07   9
   0  11   9   27.79    0.67   9
   0  12   7    0.05    0.53   9
   1   9  11    9.11    0.63   9
   2   2  11    0.19    0.39   9
   2   6  12   31.72    0.72   9
   2  11  10    0.34    0.51   9
   3   6  12    3.97    0.52   9
   3  13   8    8.40    0.45   9
   4  11  10    3.01    0.52   9
   4  13   8    5.84    0.44   9
   5  12   9   12.05    0.47   9
   8   8  10    1.91    0.32   9
   9   9   9    0.02    0.22   9
  -1   8  10  197.36    1.29   9
  -1  11   7  108.50    0.92   9
   0   2  10  143.90    0.91   9
   0   4  11    1.10    0.43   9
   0   7  11  311.71    1.66   9
   1   3  11   83.85    0.85   9
   2  13   7   73.41    0.84   9
   3  11  10   36.09    0.68   9
   4   9  11    4.04    0.57   9
   4  12   9    0.85    0.50   9
   4  14   6   26.55    0.51   9
   5  14   6    6.08    0.36   9
   6  10  10   13.22    0.48   9
   6  14   6    9.13    0.29   9
  -2   5   9  180.24    1.01   9
  -2   6   9    9.96    0.40   9
  -2   8   8  104.00    0.90   9
  -1   4  10   24.33    0.48   9
  -1   7  10   52.17    0.80   9
  -1   9   9   14.55    0.66   9
  -1  10   8   10.92    0.66   9
   0   5  11   11.30    0.51   9
   0   6  11  129.87    1.10   9
   0   9  10   58.70    0.86   9
   0  11   8    1.16    0.62   9
   0  12   6    6.97    0.56   9
   1   8  11   68.66    0.91   9
   1  10  10    3.08    0.56   9
   1  11   9    3.92    0.67   9
   2   3  11    2.43    0.50   9
   3   9  11   10.79    0.61   9
   4   3  11    3.03    0.51   9
   5   8  11   22.61    0.64   9
   6   5  11   70.04    0.75   9
   6   6  11    3.98    0.50   9
   7  12   8   14.44    0.38   9
   7  13   7    8.32    0.26   9
   7  13   7    2.85    0.16   9
   8   5  10    9.22    0.42   9
   8   6  10   14.03    0.45   9
   8   7  10    0.95    0.33   9
  -2   9   6   27.91    0.53   9
  -1   5  10  129.45    0.95   9
  -1   6  10    1.34    0.40   9
   0  10   9    8.04    0.57   9
   1   4  11   32.57    0.67   9
   1   7  11    2.69    0.54   9
   2   8  11   15.57    0.64   9
   3   3  11   15.35    0.54   9
   3  13   7   10.50    0.60   9
   4   8  11   19.81    0.70   9
   5   4  11  100.02    0.95   9
   5  10  10    3.01    0.52   9
   9   8   9    9.83    0.37   9
  -2   7   8   35.52    0.55   9
   0   8  10    5.92    0.56   9
   1   2  10    0.93    0.33   9
   1   6  11  142.20    1.16   9
   1   9  10   29.67    0.80   9
   1  12   7    7.87    0.62   9
   2   4  11   46.26    0.73   9
   3   4  11    5.80    0.60   9
   4  10  10    6.74    0.55   9
   4  13   7   58.83    0.76   9
   4  14   5    9.32    0.46   9
   6   9  10    8.51    0.56   9
   6  11   9   48.73    0.63   9
   6  12   8   11.27    0.48   9
   6  13   7    3.76    0.33   9
   8  11   8    0.30    0.30   9
   9  10   8    0.51    0.26   9
  -1   9   8  111.95    0.97   9
   0   7  10   26.96    0.65   9
   0  11   7    4.21    0.53   9
   1  10   9   53.68    0.90   9
   1  11   8   72.42    0.95   9
   2   2  10   66.53    0.72   9
   2   5  11   41.43    0.72   9
   2   6  11   43.52    0.76   9
   3   5  11    8.92    0.65   9
   3   7  11    0.96    0.51   9
   3  11   9    0.44    0.54   9
   3  12   8   20.15    0.62   9
   4   5  11   83.61    0.96   9
   4   6  11    9.16    0.64   9
   5  11   9    2.15    0.48   9
   5  14   5    8.96    0.43   9
   7   4  10    1.25    0.44   9
   7  10   9    4.01    0.45   9
   8  12   7    2.50    0.31   9
   9   7   9    4.76    0.37   9
  -1   5   9   99.86    0.83   9
  -1   6   9   11.22    0.48   9
  -1   7   9    2.11    0.40   9
  -1  10   6    6.54    0.50   9
   0   5  10    8.66    0.44   9
   0   6  10   35.11    0.65   9
   0   9   9   10.38    0.57   9
   1   8  10    2.36    0.54   9
   1  12   6    8.05    0.59   9
   2   9  10   47.46    0.85   9
   3   2  10    0.31    0.41   9
   3   9  10   13.64    0.75   9
   3  13   6   62.50    0.84   9
   4  14   4    6.52    0.43   9
   5   9  10   11.38    0.57   9
   6   8  10   57.90    0.81   9
   7   7  10   31.18    0.61   9
   9  13   5   17.46    0.31   9
  10  10   7    7.49    0.28   9
  -1   8   8   37.64    0.61   9
  -1   9   7   11.61    0.54   9
  -1  10   5   14.51    0.47   9
   0  11   6    3.01    0.54   9
   1   7  10   10.48    0.65   9
   2  10   9    1.58    0.64   9
   2  12   7    2.29    0.55   9
   7  11   8   21.44    0.55   9
  11   8   7    4.96    0.25   9
   0   8   9   64.19    0.82   9
   1   5  10   13.88    0.55   9
   1   6  10    3.25    0.48   9
   1   9   9    5.83    0.57   9
   1  11   7   16.55    0.71   9
   1  12   5    7.06    0.55   9
   2   3  10   11.11    0.44   9
   2   8  10   76.51    0.95   9
   2  11   8   10.42    0.64   9
   3   8  10   21.02    0.78   9
   3  10   9   27.77    0.82   9
   4  13   6    4.07    0.51   9
   5   3  10   13.62    0.60   9
   5  10   9   77.58    0.95   9
   5  13   6   91.65    0.86   9
   5  14   4    9.14    0.47   9
   6   4  10    2.50    0.54   9
   6   7  10    5.12    0.53   9
   6  13   6    1.74    0.44   9
   6  14   4    1.91    0.39   9
   7   9   9   -0.01    0.50   9
   7  14   4    0.56    0.28   9
   8   8   9    6.19    0.41   9
   8  10   8    5.82    0.46   9
   9   9   8    6.93    0.39   9
  10   7   8   20.03    0.40   9
   0   7   9    8.45    0.48   9
   0   9   8    5.04    0.52   9
   0  10   7   73.43    0.86   9
   0  11   5    6.25    0.42   9
   1  10   8    1.06    0.56   9
   2   4  10   77.37    0.88   9
   2   7  10    1.06    0.52   9
   2  12   6    5.01    0.62   9
   3   3  10   21.24    0.55   9
   3  11   8  113.92    1.09   9
   4   3  10    5.07    0.53   9
   4   8  10   33.93    0.77   9
   4  12   7   10.87    0.66   9
   6   5  10    8.90    0.54   9
   6  11   8    0.67    0.48   9
   6  12   7   37.66    0.70   9
   8  13   5    6.43    0.35   9
  10  11   6    0.86    0.20   9
  10  11   6    0.30    0.13   9
  11   7   7    0.86    0.28   9
  -1   8   7  374.11    1.50   9
   0   5   9    7.17    0.38   9
   0   6   9   17.14    0.50   9
   1   8   9    9.25    0.56   9
   2   5  10   12.50    0.52   9
   2   6  10   99.61    1.00   9
   2   9   9   48.39    0.83   9
   3   4  10    3.76    0.55   9
   4   4  10   16.27    0.65   9
   4   7  10   -0.45    0.52   9
   5   4  10    0.85    0.44   9
   5   5  10    3.45    0.63   9
   5  11   8   60.61    0.82   9
   5  12   7   20.42    0.61   9
   5  14   3   20.48    0.52   9
   6   9   9  108.01    1.05   9
   8   4   9    5.97    0.47   9
   8   6   9    3.65    0.55   9
   8  11   7   15.58    0.50   9
   8  14   3   15.52    0.34   9
  10   9   7   10.21    0.38   9
  11  11   5    0.29    0.16   9
  11  11   5    0.11    0.10   9
  12   7   6    0.09    0.23   9
   0   8   8    5.99    0.45   9
   2  10   8   93.29    1.02   9
   3   5  10    4.79    0.49   9
   3   6  10    3.05    0.54   9
   3   9   9   18.15    0.69   9
   4   5  10    9.92    0.58   9
   7   8   9   12.33    0.56   9
   8  12   6   40.94    0.56   9
   9   8   8    0.96    0.36   9
   5   3   7   -0.28    0.46  10
   7   3   7    6.01    0.65  10
   8   1   8   13.04    0.83  10
  10   3   6    0.98    0.87  10
  10   4   5    3.63    0.76  10
  10   6   2   26.05    0.88  10
  11   2   6    3.87    0.81  10
  11   5   3   60.28    1.12  10
  12   6   0  115.48    1.32  10
  13   1   5    1.19    0.60  10
  15   2   2    5.31    0.52  10
  15   5  -3    1.46    0.59  10
  16   4  -3   30.93    0.63  10
   4   3   7   22.99    0.59  10
   5   2   8   21.09    0.63  10
   6   2   8   46.68    0.89  10
   6   5   5   65.63    0.96  10
   6   6   3  139.81    1.18  10
   7   2   8    9.73    0.80  10
   7   5   5    3.24    0.65  10
   8   3   7   76.01    1.14  10
   8   5   5  127.61    1.38  10
   8   7  -1  114.36    1.12  10
   9   7  -1   20.01    0.70  10
  10   5   4    1.51    0.75  10
  10   7  -2   20.85    0.73  10
  10   7  -1   57.17    1.04  10
  12   1   6    1.53    0.66  10
  14   5   0   44.02    0.93  10
  15   1   3    1.06    0.45  10
  15   4   0   26.91    0.66  10
  15   5  -2    6.88    0.61  10
  16   0   2   17.90    0.44  10
  16   4  -2   10.06    0.53  10
   4   2   8  372.43    1.80  10
   5   5   5   58.18    0.82  10
   8   7   0  276.74    1.68  10
  10   6   3  104.02    1.38  10
  10   7   0    5.64    0.80  10
  11   6   2    4.26    0.73  10
  12   3   5    2.05    0.75  10
  13   3   4    1.50    0.60  10
  14  -2   5    5.38    0.34  10
  14   3   3   39.15    0.84  10
  14   4   2   30.16    0.82  10
  16   2   1    2.13    0.40  10
  16   3   0    4.08    0.42  10
  17   1   0    0.62    0.26  10
   5   1   9   45.11    0.85  10
   6   4   7    5.09    0.70  10
   7   6   4   47.75    0.91  10
   7   7   0   89.19    0.96  10
   7   7   1  333.82    1.82  10
   8   6   4    4.43    0.69  10
   8   7   1  216.15    1.55  10
   9   3   7   30.21    0.88  10
  11   1   7    3.64    0.64  10
  11   3   6   15.34    0.86  10
  11   5   4    2.75    0.79  10
  11   7  -1  251.06    1.71  10
  13  -1   6    0.72    0.42  10
  13   2   5    3.18    0.63  10
  13   5   2   48.22    0.95  10
  13   6   0   13.06    0.72  10
  14  -1   5    0.37    0.35  10
  14   2   4   10.51    0.60  10
  14   6  -2    3.54    0.63  10
  15   5  -1    9.05    0.62  10
   5   3   8  130.00    1.29  10
   5   4   7   43.07    0.79  10
   6   1   9   25.45    0.71  10
   6   3   8    0.97    0.70  10
   6   5   6   15.61    0.69  10
   7   5   6   27.91    0.83  10
   8   7   2    2.64    0.69  10
   9   6   4    0.47    0.72  10
  10   0   8   58.67    0.88  10
  11   7   0  113.85    1.28  10
  12  -2   7    0.14    0.37  10
  12  -1   7   35.88    0.64  10
  12   2   6    7.96    0.69  10
  12   7  -2   77.35    1.05  10
  14   5   1   84.12    1.01  10
  15   3   2   19.42    0.57  10
  15   4   1   10.12    0.58  10
  16   4  -1    2.78    0.44  10
  17   3  -2    4.26    0.28  10
   4   3   8   10.54    0.60  10
   5   5   6   11.10    0.57  10
   5   6   4    5.67    0.46  10
   6   7   1  415.27    1.87  10
   7   1   9    5.01    0.59  10
   7   3   8   96.06    1.20  10
   7   7   2  178.08    1.41  10
   8   4   7   56.05    1.05  10
   9   7   2   17.35    0.79  10
  12   7  -1   79.62    1.07  10
  14   6  -1   23.39    0.71  10
   5   2   9    3.88    0.64  10
   6   2   9    1.43    0.67  10
   6   6   5   44.63    0.86  10
   6   7   2   16.13    0.58  10
   7   6   5   17.86    0.77  10
   7   7   3    4.39    0.70  10
   8   3   8    0.88    0.63  10
   8   6   5    6.34    0.73  10
   8   7   3  111.45    1.25  10
   9   4   7   33.13    1.01  10
   9   5   6   34.19    1.03  10
  10   1   8    1.38    0.55  10
  10   6   4    7.82    0.77  10
  10   7   2   16.62    0.85  10
  11   2   7   10.63    0.63  10
  12   4   5    6.73    0.66  10
  12   5   4    0.33    0.75  10
  13   5   3    0.32    0.67  10
  14   4   3    5.45    0.57  10
  15   5   0   39.92    0.72  10
  16   5  -3   14.19    0.47  10
   4   2   9   87.71    1.02  10
   6   7   3  104.17    1.13  10
   7   2   9   26.31    0.87  10
   9   0   9   31.50    0.75  10
   9   6   5   60.48    1.10  10
   9   7   3   12.82    0.78  10
  11   4   6    1.15    0.73  10
  11   5   5   -0.08    0.70  10
  12   6   3    0.90    0.75  10
  13   1   6    0.83    0.40  10
  13   3   5    8.93    0.55  10
  14   1   5    0.77    0.27  10
  14   1   5    0.28    0.17  10
  14   3   4    0.54    0.43  10
  14   5   2    1.43    0.58  10
  16   2   2    2.56    0.30  10
  16   4   0   45.44    0.62  10
   6   4   8   26.64    0.79  10
   6   5   7   31.23    0.83  10
   7   4   8   16.03    0.91  10
   7   5   7    0.70    0.66  10
   8   7   4   16.30    0.90  10
   9   8  -1  148.55    1.31  10
  10   2   8   18.17    0.74  10
  10   7   3    3.33    0.71  10
  11   7   2   44.81    0.99  10
  13   6   2    1.81    0.58  10
  13   7  -1   16.55    0.66  10
  15   1   4    8.61    0.29  10
  15   3   3    1.11    0.38  10
  15   4   2    1.29    0.38  10
  16   5  -2    0.87    0.35  10
   3   2   9  115.97    1.03  10
   4   4   8   35.14    0.78  10
   4   6   5   32.59    0.65  10
   5   3   9   11.65    0.73  10
   5   7   3    2.82    0.45  10
   6   3   9    1.84    0.75  10
   6   6   6   34.03    0.87  10
   6   7   4    2.82    0.55  10
   7   6   6    7.65    0.73  10
   8   4   8    2.69    0.80  10
   8   5   7   19.02    0.82  10
   8   6   6    6.84    0.85  10
   8   8  -1  135.86    1.21  10
   8   8   0    9.54    0.69  10
   9   1   9    0.15    0.56  10
   9   7   4   18.54    0.95  10
   9   8   0   84.30    1.05  10
   9   8   1   24.43    0.92  10
  10   4   7   -0.62    0.64  10
  10   8  -1   34.48    0.78  10
  10   8   0  416.39    2.17  10
  11   3   7    5.24    0.58  10
  13   2   6    5.34    0.46  10
  13   7   0  115.67    1.19  10
  14   2   5    6.52    0.41  10
  14   6   1    0.05    0.54  10
  15   5   1    4.12    0.45  10
   4   5   7  132.27    1.17  10
   5   1  10  178.53    1.37  10
   5   6   6    1.04    0.52  10
   6   1  10    8.42    0.66  10
   7   3   9    5.96    0.75  10
   8   8   1  183.07    1.47  10
  10   8   1   47.76    1.07  10
  11   1   8    6.23    0.47  10
  11   8  -1   80.32    1.07  10
  12   5   5   12.33    0.72  10
  13   5   4    6.73    0.63  10
  14   7  -2    4.41    0.50  10
  16   5  -1   17.18    0.43  10
   3   4   8   71.64    0.91  10
   6   7   5   53.58    1.02  10
   7   7   5   67.55    1.08  10
   7   8   2   69.84    1.08  10
   8   7   5  126.80    1.44  10
   8   8   2    3.88    0.67  10
   9   6   6   21.26    0.85  10
   9   8   2   44.14    0.93  10
  10   3   8    0.94    0.54  10
  10   7   4    5.13    0.75  10
  11   8   0   12.11    0.69  10
  12   4   6    2.05    0.54  10
  13   4   5    6.54    0.49  10
  13   7   1   10.32    0.70  10
  14   4   4    9.36    0.45  10
  14   5   3   36.66    0.65  10
  15   2   4    1.55    0.22  10
  16   3   2    1.26    0.24  10
  16   4   1   15.40    0.38  10
   3   5   7   13.52    0.49  10
   5   2  10    9.39    0.66  10
   5   7   5    3.94    0.62  10
   6   2  10   44.64    0.90  10
   6   5   8    2.72    0.64  10
   6   6   7  117.36    1.36  10
   6   8   1  121.66    1.14  10
   7   5   8   10.21    0.85  10
   7   8   3   20.93    0.86  10
   9   7   5   -0.45    0.85  10
  11   2   8   -0.34    0.51  10
  11   4   7    9.34    0.69  10
  14   6   2   35.36    0.68  10
  15   6   0    1.63    0.41  10
   4   2  10  120.06    1.13  10
   4   7   4  317.59    1.66  10
   5   4   9   42.86    0.86  10
   5   6   7   69.69    1.02  10
   6   4   9    7.89    0.65  10
   6   8   3   11.47    0.79  10
   8   1  10    1.74    0.52  10
   8   6   7    0.99    0.83  10
   9   8   3   74.25    1.15  10
  10   1   9   21.57    0.61  10
  10   5   7   37.46    0.83  10
  11   7   4   45.57    0.92  10
  12   3   7    4.32    0.48  10
  12   7   3   14.38    0.67  10
  12   8   0   90.40    1.04  10
  13   0   7    0.94    0.24  10
  14   7   0    6.10    0.54  10
  15   4   3    3.06    0.26  10
  15   4   3    0.72    0.16  10
  15   5   2   20.30    0.47  10
  16   5   0    0.42    0.26  10
   3   2  10    0.66    0.49  10
   3   6   6  115.15    1.04  10
   4   6   7    1.10    0.58  10
   4   7   5  126.39    1.17  10
   6   7   6   71.64    1.08  10
   7   7   6    8.03    0.74  10
   7   8   4    0.29    0.68  10
   8   7   6    1.65    0.81  10
   8   8   4   44.01    0.97  10
  10   4   8   18.71    0.73  10
  12   0   8    5.08    0.32  10
  12   8   1    8.23    0.73  10
  13   1   7   -0.17    0.25  10
  13   7   2   23.22    0.63  10
  15   3   4   13.37    0.34  10
   2   3   9   69.81    0.82  10
   3   4   9   42.79    0.83  10
   4   3  10    4.95    0.62  10
   5   3  10   12.62    0.65  10
   5   7   6  249.62    1.69  10
   5   8   1    5.89    0.44  10
   5   8   2   23.88    0.61  10
   5   8   3  164.40    1.36  10
   6   3  10    1.09    0.59  10
   6   8   4   21.50    0.74  10
   8   2  10    3.70    0.56  10
   9   5   8   16.34    0.80  10
  10   2   9    6.31    0.47  10
  11   3   8   15.43    0.52  10
  12   5   6    3.68    0.47  10
  12   6   5   -0.17    0.50  10
  13   5   5   -0.44    0.41  10
  13   8  -1   54.29    0.81  10
  15   6   1    4.71    0.37  10
   4   7   6   27.15    0.77  10
   5   6   8  131.71    1.39  10
   5   8   4    5.60    0.67  10
   6   5   9    6.33    0.80  10
   6   6   8   24.85    0.83  10
   7   8   5   30.31    0.97  10
   8   9   0    9.36    0.65  10
   8   9   1   17.06    0.79  10
   9   9   0  165.93    1.41  10
   9   9   1    6.08    0.74  10
  10   9  -1   30.93    0.78  10
  10   9   0   15.25    0.75  10
  11   7   5    5.16    0.68  10
  11   8   3    7.29    0.66  10
  12   1   8    2.20    0.32  10
  12   8   2   71.63    1.00  10
  13   4   6    2.63    0.39  10
  14   5   4    0.35    0.27  10
  14   5   4    0.29    0.17  10
  14   6   3    1.91    0.38  10
  14   7   1    7.62    0.45  10
   3   3  10   20.90    0.63  10
   3   7   5  119.65    1.10  10
   4   5   9   19.74    0.72  10
   4   6   8    5.18    0.71  10
   6   7   7    4.11    0.69  10
   6   8   5   15.23    0.75  10
   7   5   9    1.88    0.63  10
   7   7   7    0.80    0.69  10
   8   8   5    1.07    0.68  10
   9   4   9    9.43    0.67  10
   9   9   2    4.11    0.81  10
  10   3   9   13.44    0.58  10
  10   6   7   15.71    0.68  10
  10   9   1    1.63    0.70  10
  12   4   7   19.15    0.51  10
  13   2   7    4.51    0.26  10
  13   7   3    4.47    0.45  10
  14   4   5    4.20    0.27  10
  15   7  -1   -0.12    0.30  10
   2   4   9    8.32    0.46  10
   2   5   8   73.37    0.86  10
   4   4  10   16.39    0.77  10
   4   8   3    0.06    0.42  10
   5   2  11    2.46    0.59  10
   5   4  10    0.95    0.61  10
   5   7   7   12.63    0.72  10
   5   8   5  298.72    1.82  10
   6   4  10    2.22    0.62  10
   7   9   0    9.72    0.56  10
   7   9   2   70.92    1.02  10
   8   3  10    0.88    0.50  10
   8   5   9   20.88    0.81  10
   8   9   3    5.02    0.85  10
   9   2  10    3.78    0.48  10
  10   5   8    6.60    0.58  10
  10   7   6    3.27    0.63  10
  11   1   9   -0.09    0.29  10
  12   2   8   11.22    0.37  10
  13   8   1    8.04    0.50  10
  15   5   3    0.13    0.24  10
   2   3  10   11.54    0.58  10
   3   5   9  170.63    1.36  10
   3   6   8    4.47    0.62  10
   3   7   6  175.14    1.31  10
   4   2  11   55.07    0.83  10
   4   7   7  180.15    1.44  10
   4   8   4  140.66    1.20  10
   6   8   6   19.42    0.84  10
   6   9   1   35.44    0.81  10
   6   9   2   29.65    0.81  10
   7   8   6    4.23    0.71  10
   8   8   6    4.46    0.84  10
   9   6   8   26.84    0.82  10
   9   9   3    1.63    0.64  10
  10   8   5    0.94    0.70  10
  11   8   4    0.11    0.56  10
  11   9   1    9.81    0.60  10
  12   8   3   15.47    0.58  10
  14   7   2    0.51    0.28  10
  14   7   2    0.17    0.18  10
  14   8  -1   -0.23    0.35  10
  15   6   2    0.22    0.25  10
  15   7   0    4.30    0.30  10
   2   6   7   22.71    0.56  10
   3   4  10    3.31    0.55  10
   4   8   5    0.38    0.50  10
   5   3  11    4.63    0.61  10
   5   6   9    3.81    0.65  10
   5   8   6    5.86    0.70  10
   6   6   9   -0.66    0.65  10
   6   7   8   13.27    0.86  10
   6   9   0   69.63    0.90  10
   6   9   3   88.04    1.11  10
   7   2  11    3.20    0.50  10
   8   9   4   16.11    0.77  10
   9   5   9    1.79    0.57  10
  10   4   9    1.10    0.45  10
  10   9   3   16.57    0.72  10
  11   2   9   11.15    0.39  10
  11   6   7   21.77    0.64  10
  11   7   6    8.03    0.60  10
  11   9   2   33.12    0.83  10
  12   3   8    5.72    0.33  10
  12   6   6    9.59    0.47  10
  12   7   5    5.91    0.53  10
  12   9   0   45.31    0.80  10
  13   5   6    1.22    0.32  10
  13   6   5    3.70    0.36  10
  13   8   2    0.99    0.46  10
   1   4   9  253.29    1.42  10
   3   7   7    4.70    0.53  10
   4   3  11    2.45    0.49  10
   4   5  10   12.30    0.77  10
   4   6   9   64.40    1.01  10
   5   5  10    3.17    0.60  10
   5   7   8    5.94    0.69  10
   5   9   2    4.40    0.60  10
   6   5  10    9.98    0.67  10
   6   9   4   13.84    0.72  10
   7   7   8    5.32    0.72  10
   9   3  10   23.75    0.58  10
   9   8   6   40.59    0.89  10
  12   9   1    3.05    0.54  10
  14   5   5    8.19    0.30  10
  14   6   4    8.09    0.31  10
  14   8   0    3.42    0.38  10
   2   4  10   79.52    0.95  10
   2   6   8   10.12    0.50  10
   2   7   6   51.28    0.80  10
   3   3  11   14.71    0.64  10
   3   6   9    3.26    0.68  10
   3   8   4   30.83    0.65  10
   4   7   8   30.40    0.84  10
   4   8   6  153.07    1.36  10
   5   9   1  120.66    1.11  10
   5   9   3    3.45    0.56  10
   5   9   4   38.27    0.90  10
   6   9   5   73.59    1.19  10
   7   3  11    5.46    0.54  10
   7   5  10   20.25    0.70  10
   7   8   7   17.86    0.79  10
   8   6   9    4.68    0.61  10
   8   7   8    0.48    0.63  10
   8   9   5    3.04    0.70  10
  10   6   8    2.33    0.49  10
  10   9   4    6.92    0.72  10
  11   3   9    7.81    0.36  10
  11   8   5   12.19    0.59  10
  11   9   3   -0.21    0.59  10
  12   8   4   29.75    0.61  10
  14   7   3    6.49    0.33  10
  15   7   1    4.06    0.25  10
   1   3  10  278.85    1.46  10
   3   5  10    5.47    0.59  10
   4   4  11    7.19    0.68  10
   5   4  11  100.62    1.14  10
   5   9   5    3.71    0.78  10
   9   4  10    1.48    0.46  10
   9   9   5   13.47    0.79  10
  12   9   2    5.62    0.51  10
  13   8   3   10.54    0.45  10
  14   8   1   -0.10    0.30  10
   1   6   7   92.27    0.89  10
   2   3  11    2.69    0.51  10
   2   7   7  126.60    1.12  10
   3   4  11    5.04    0.61  10
   3   7   8    2.11    0.58  10
   4   8   7   23.22    0.78  10
   4   9   3   18.54    0.71  10
   5   6  10   -0.08    0.77  10
   5   7   9   18.23    0.77  10
   6   9   6    1.32    0.80  10
   7   9   6    2.35    0.67  10
   7  10   2    0.05    0.70  10
   8   5  10   10.09    0.54  10
   8  10   0   52.76    0.92  10
   8  10   1    9.86    0.59  10
   9   6   9   14.39    0.63  10
   9   7   8    7.75    0.58  10
   9   8   7    3.40    0.67  10
   9  10   0   17.73    0.63  10
   9  10   1    5.32    0.60  10
  10   5   9    2.08    0.38  10
  10  10   1   25.63    0.73  10
  12   4   8    3.95    0.28  10
  13   9   0    3.98    0.39  10
   1   5   9   34.14    0.66  10
   2   5  10   12.70    0.62  10
   2   6   9    7.71    0.54  10
   4   6  10   78.19    1.06  10
   4   7   9   17.12    0.74  10
   4   9   2   47.67    0.77  10
   4   9   4    4.96    0.54  10
   5   8   8   16.11    0.77  10
   5   9   6   42.08    1.00  10
   6   8   8   77.31    1.10  10
   7   4  11   39.89    0.76  10
   7   6  10    8.73    0.68  10
   7   7   9   29.30    0.80  10
   7  10   1   15.85    0.66  10
   7  10   3   34.67    0.89  10
   8   3  11    7.97    0.48  10
   8  10   3    9.07    0.68  10
  10   9   5    1.70    0.55  10
  10  10   2   14.80    0.74  10
  11   4   9    2.30    0.30  10
  11   9   4   10.03    0.49  10
  12   7   6    0.49    0.32  10
  12   9   3   12.38    0.53  10
  13   6   6    0.26    0.24  10
  13   7   5    0.65    0.27  10
   2   4  11   45.17    0.85  10
   2   7   8    3.65    0.51  10
   2   8   4   16.83    0.52  10
   3   6  10    3.06    0.70  10
   3   7   9    2.48    0.70  10
   3   8   7   30.15    0.79  10
   4   5  11   89.91    1.13  10
   4   8   8   25.18    0.92  10
   4   9   1  381.71    1.73  10
   6   5  11   65.60    0.96  10
   6  10   1   40.93    0.84  10
   6  10   2    4.23    0.61  10
   6  10   3   12.73    0.74  10
   7  10   4    1.79    0.78  10
   8   8   8    2.46    0.67  10
  10   7   8   21.12    0.59  10
  11   6   8    3.17    0.36  10
  11   8   6   -0.07    0.39  10
  12   8   5   13.78    0.44  10
  14   8   2    2.22    0.26  10
   1   7   6    3.37    0.41  10
   3   5  11   10.57    0.74  10
   4   3  12   39.22    0.76  10
   4   9   6    0.76    0.62  10
   5   3  12  105.31    1.03  10
   5   9   7   49.39    1.08  10
   6   9   7  123.91    1.31  10
   6  10   4   64.79    1.02  10
   8   4  11    2.39    0.41  10
   8   6  10   14.07    0.61  10
   9   5  10   28.53    0.56  10
   9  10   4    2.29    0.58  10
  10   8   7    1.27    0.44  10
  10  10   3    5.86    0.57  10
  11  10   2    3.90    0.52  10
  13   8   4    5.74    0.31  10
  13   9   2   21.06    0.45  10
   1   5  10   13.87    0.55  10
   1   6   9    2.20    0.44  10
   1   7   7   25.18    0.60  10
   2   6  10  100.13    1.14  10
   3   8   8   14.17    0.73  10
   3   9   3   44.22    0.73  10
   3   9   5    2.83    0.52  10
   5   7  10   68.96    1.02  10
   5   8   9  120.69    1.32  10
   5  10   3   26.50    0.78  10
   5  10   4   61.64    1.04  10
   6   3  12    3.80    0.46  10
   6   7  10    4.53    0.70  10
   7   5  11    9.42    0.53  10
   7  10   5    3.83    0.69  10
   8   9   7    3.45    0.61  10
  10   4  10    2.30    0.28  10
  10   6   9    0.92    0.32  10
  10   9   6    0.53    0.52  10
  11   9   5    3.68    0.41  10
  12   5   8   -0.16    0.21  10
   0   4  10   11.87    0.53  10
   0   5   9   13.59    0.50  10
   1   7   8   16.96    0.63  10
   2   5  11   37.74    0.78  10
   2   8   7   15.36    0.63  10
   3   9   6   37.07    0.82  10
   4   6  11    9.25    0.74  10
   4   8   9    0.74    0.63  10
   4   9   7   10.70    0.72  10
   5   4  12   12.45    0.59  10
   5  10   1   14.83    0.66  10
   5  10   5   48.63    1.03  10
   7   7  10   27.32    0.74  10
   7   8   9   12.19    0.71  10
   9   3  11    0.03    0.25  10
   9  10   5    4.39    0.61  10
  10  10   4    5.42    0.49  10
  11   5   9   -0.34    0.23  10
  12   9   4    1.95    0.28  10
  12  10   1    2.59    0.37  10
   2   8   8    6.24    0.72  10
   3   6  11   48.95    0.96  10
   3   7  10   32.80    0.82  10
   4  10   3    1.25    0.64  10
   5   9   8  136.97    1.34  10
   6   4  12   12.10    0.56  10
   6   6  11    2.93    0.51  10
   6  10   6   29.57    0.83  10
   8   5  11   37.06    0.61  10
   8  10   6   16.85    0.74  10
   9   6  10    3.58    0.38  10
   9   9   7    5.70    0.52  10
  12   7   7    2.07    0.25  10
  13   9   3    1.00    0.26  10
   1   6  10    1.47    0.52  10
   1   8   6   13.07    0.52  10
   2   4  12  138.02    1.22  10
   3   8   9   17.78    0.75  10
   4   9   8    7.30    0.71  10
   4  10   2   13.25    0.67  10
   5  10   6    0.99    0.66  10
   7   6  11   34.30    0.68  10
   8   7  10    1.37    0.46  10
   8   8   9    5.73    0.50  10
   8  11   1    5.69    0.60  10
   9  11   1   -0.15    0.49  10
   9  11   2   22.18    0.69  10
  10   5  10    0.15    0.24  10
  10  10   5    1.08    0.47  10
  11   7   8   10.49    0.34  10
  11   8   7    5.11    0.29  10
  12   8   6    4.55    0.24  10
  12  10   2    6.25    0.38  10
   0   5  10    8.08    0.50  10
   0   6   9   18.64    0.56  10
   0   7   7  388.96    1.78  10
   1   5  11   27.45    0.70  10
   1   8   7   86.47    0.98  10
   2   6  11   48.03    0.89  10
   2   7  10    0.28    0.60  10
   2   9   3  138.77    1.14  10
   2   9   4    7.17    0.50  10
   3   5  12   42.81    0.86  10
   3   9   8    8.37    0.81  10
   4  10   6   12.22    0.74  10
   5   5  12   11.81    0.54  10
   7   4  12    3.00    0.37  10
   7  10   7   32.00    0.84  10
   7  11   1    0.27    0.62  10
   7  11   2   33.31    0.77  10
   7  11   3   24.80    0.74  10
   9   4  11    3.88    0.30  10
   9  11   3   19.32    0.70  10
  10   7   9   14.59    0.40  10
  10   8   8   13.98    0.38  10
  10  11   1    8.58    0.52  10
  11   9   6    5.65    0.33  10
  11  10   4    2.68    0.37  10
  12   9   5    1.79    0.26  10
   0   4  11    1.10    0.41  10
   1   8   8   81.16    1.05  10
   2   8   9    1.34    0.60  10
   3  10   4    0.64    0.68  10
   4   8  10   35.42    0.86  10
   4  10   1    0.01    0.38  10
   5   7  11    9.79    0.61  10
   5  10   7  124.05    1.28  10
   6   5  12   -0.12    0.40  10
   6   7  11   13.50    0.62  10
   6   8  10   59.14    0.88  10
   6   9   9  105.63    1.12  10
   6  11   2   12.16    0.63  10
   6  11   3   16.99    0.74  10
   6  11   4    5.82    0.73  10
   8  10   7   25.94    0.71  10
   8  11   4    8.51    0.58  10
  10  11   2    7.49    0.51  10
  12  10   3   -0.15    0.27  10
  -1   4  10   25.10    0.57  10
  -1   5   9   97.19    0.88  10
   0   7   8   13.91    0.52  10
   1   4  12   53.21    0.80  10
   1   7  10   11.07    0.72  10
   2   5  12   65.83    0.91  10
   3   8  10   20.52    0.75  10
   3  10   5  152.11    1.34  10
   3  10   6    4.43    0.78  10
   4   6  12    2.05    0.63  10
   4   9   9  137.06    1.32  10
   4  10   7    4.21    0.68  10
   5  11   3   23.33    0.86  10
   6  11   1    3.35    0.60  10
   7   9   9    0.32    0.51  10
   7  11   5    2.68    0.61  10
   8   6  11    2.90    0.37  10
   8  11   5    2.67    0.61  10
   9   9   8    7.08    0.43  10
   9  11   4    2.62    0.51  10
  10  11   3    6.17    0.50  10
  -1   6   8  145.49    1.10  10
   0   7   9    7.55    0.60  10
   1   8   9   12.18    0.76  10
   2   7  11   67.42    1.05  10
   2   8  10   80.29    1.13  10
   2   9   8    1.67    0.61  10
   3   6  12    3.67    0.57  10
   3  10   2    0.03    0.49  10
   5   6  12   -0.28    0.45  10
   5  11   2   55.67    0.92  10
   5  11   5   19.93    0.89  10
   7   5  12   15.21    0.46  10
   7   7  11   19.39    0.53  10
   9   5  11    0.18    0.23  10
   9   7  10    0.77    0.28  10
  10  10   6   15.93    0.44  10
  11  10   5    4.19    0.34  10
   0   8   6    9.62    0.47  10
   0   8   7    0.10    0.51  10
   1   5  12  271.73    1.60  10
   1   9   4    2.91    0.49  10
   1   9   5    3.52    0.45  10
   1   9   6  152.67    1.25  10
   1   9   7   36.27    0.85  10
   2   6  12   33.72    0.85  10
   3  10   7   14.59    0.75  10
   4  10   8  127.08    1.29  10
   4  11   4    1.62    0.74  10
   5  11   1   55.04    0.84  10
   5  11   6   79.99    1.17  10
   6   6  12   23.42    0.53  10
   7  10   8   17.27    0.62  10
   7  11   6   29.76    0.73  10
   8   8  10    1.76    0.40  10
   8   9   9    2.58    0.41  10
   9  10   7   13.48    0.47  10
   9  11   5    5.08    0.48  10
  10  11   4    0.35    0.41  10
  11  11   2   18.63    0.45  10
  12  10   4    3.58    0.25  10
  -1   6   9   10.51    0.48  10
   0   6  11  129.85    1.23  10
   0   8   8    6.43    0.63  10
   1   7  11    3.13    0.69  10
   2   9   9   48.05    0.93  10
   2  10   4    3.19    0.57  10
   2  10   5   26.88    0.76  10
   2  10   6   83.76    1.07  10
   3  10   1   45.40    0.74  10
   4   8  11   22.04    0.72  10
   4  11   3    2.31    0.61  10
   4  11   5   27.56    0.81  10
   5   8  11   24.96    0.67  10
   5   9  10   12.44    0.64  10
   6   8  11    0.27    0.50  10
   6   9  10    8.34    0.62  10
   8  10   8    6.21    0.50  10
   8  11   6    0.40    0.42  10
  11  11   3    0.16    0.30  10
  -1   7   8   47.59    0.77  10
   0   7  10   29.04    0.71  10
   1   6  12    7.16    0.68  10
   1   8  10    2.73    0.60  10
   1   9   3    1.17    0.37  10
   1   9   8    6.05    0.65  10
   2  10   3   18.09    0.58  10
   2  10   7   19.29    0.79  10
   3   9  10   14.60    0.71  10
   4   5  13    7.50    0.51  10
   4   7  12    0.63    0.49  10
   4  11   2    4.22    0.56  10
   4  11   6    8.80    0.70  10
   5   7  12   14.07    0.60  10
   6  10   9    2.25    0.59  10
   6  11   7   79.92    0.99  10
   7   6  12    1.54    0.31  10
   7  11   7   15.92    0.67  10
  10   8   9    1.38    0.20  10
  10   9   8    0.25    0.20  10
  10   9   8    0.10    0.13  10
  -1   5  11    2.49    0.54  10
  -1   6  10    0.97    0.44  10
   0   5  12  122.98    1.12  10
   0   8   9   64.13    0.93  10
   1   9   9    6.55    0.75  10
   2   7  12    4.03    0.64  10
   2   9  10   48.78    0.99  10
   2  10   8  100.34    1.27  10
   3  11   4   84.92    1.16  10
   4  11   7  168.57    1.44  10
   5   5  13    2.70    0.36  10
   6   7  12    3.67    0.43  10
   7   8  11    1.82    0.37  10
   7   9  10    5.38    0.43  10
   7  10   9    4.55    0.51  10
   7  12   3    2.76    0.58  10
   8  12   2   39.23    0.74  10
   8  12   3   12.86    0.60  10
   9   9   9    0.28    0.29  10
   9  11   6   37.22    0.57  10
  10  10   7    7.72    0.32  10
  10  11   5    7.97    0.36  10
  11  10   6    1.84    0.23  10
  -1   7   9    2.50    0.44  10
   0   7  11  315.03    1.84  10
   0   9   7    4.44    0.62  10
   2  10   2   32.08    0.63  10
   3   6  13   48.33    0.80  10
   3  10   9   26.75    0.81  10
   3  11   3   28.68    0.73  10
   3  11   6    6.48    0.68  10
   4   6  13    1.26    0.46  10
   4  11   1    7.86    0.49  10
   5  11   8   57.74    0.96  10
   6  11   8    0.36    0.60  10
   6  12   2   61.34    0.92  10
   8  11   7   14.96    0.49  10
   8  12   4   36.66    0.70  10
   9   8  10    0.39    0.22  10
   9  10   8    0.51    0.27  10
   9  12   2   -0.17    0.41  10
   9  12   3    6.01    0.46  10
  -1   6  11   54.74    0.89  10
  -1   7  10   51.07    0.87  10
  -1   8   6   72.35    0.88  10
  -1   8   7  373.82    1.79  10
   0   6  12  150.06    1.31  10
   0   8  10    6.07    0.61  10
   0   9   5   84.46    0.92  10
   0   9   8    4.80    0.67  10
   1   5  13   10.82    0.54  10
   1   8  11   71.13    1.01  10
   1  10   4   13.78    0.67  10
   1  10   6    1.04    0.56  10
   1  10   7   38.52    0.86  10
   2  10   9    0.24    0.78  10
   3  11   2  138.96    1.23  10
   3  11   7    2.60    0.66  10
   4   8  12    5.86    0.58  10
   4   9  11    5.23    0.56  10
   5   6  13   13.90    0.47  10
   5  10  10    3.14    0.59  10
   5  12   3    7.32    0.72  10
   5  12   4   29.57    0.80  10
   6  12   5    4.17    0.57  10
   7  11   8   20.92    0.60  10
   7  12   5    2.33    0.51  10
  -2   5  10   40.18    0.65  10
  -2   6   9    9.40    0.45  10
  -1   8   8   39.45    0.74  10
   0   9   4   44.88    0.71  10
   1   9  10   31.73    0.82  10
   1  10   8    1.28    0.63  10
   2  11   6    2.58    0.78  10
   4  10  10    6.06    0.60  10
   5   8  12    3.72    0.42  10
   5  12   2  102.51    1.12  10
   5  12   6   13.52    0.76  10
   6   9  11   25.25    0.57  10
   6  10  10   13.63    0.53  10
   6  12   6   22.36    0.72  10
   7   7  12    8.64    0.33  10
   7  12   6   -0.20    0.50  10
   9  11   7   19.37    0.42  10
   9  12   4    1.10    0.35  10
  -2   4  11   68.70    0.79  10
  -1   5  12  123.15    1.10  10
  -1   8   9   88.76    1.02  10
   0   8  11    1.19    0.68  10
   0   9   9   11.64    0.68  10
   1   6  13    2.35    0.50  10
   1  10   3    4.87    0.46  10
   2  10   1    2.38    0.37  10
   2  11   4    0.12    0.60  10
   2  11   7    7.04    0.70  10
   4   7  13   27.74    0.60  10
   4  12   4   43.43    0.87  10
   5  11   9    1.22    0.57  10
   8   8  11    0.95    0.23  10
  -2   5  11   52.06    0.80  10
  -2   7   8   37.46    0.65  10
  -1   6  12   17.46    0.72  10
  -1   7  11  315.08    1.75  10
   0   9  10   62.43    1.08  10
   1   8  12    0.42    0.67  10
   1   9  11    9.14    0.78  10
   1  10   9   57.92    1.02  10
   2   7  13    2.66    0.58  10
   2  11   3    4.62    0.53  10
   2  11   8    7.75    0.80  10
   4  11   9   10.71    0.64  10
   5  12   7   17.68    0.73  10
   6  11   9   47.32    0.68  10
   6  12   7   36.77    0.73  10
   7   9  11    1.36    0.29  10
   7  10  10    0.29    0.34  10
   8  11   8    0.42    0.24  10
   8  11   8    0.30    0.16  10
   9  12   5   12.73    0.39  10
  -2   7   9   93.72    0.96  10
  -1   9   6   71.49    0.89  10
  -1   9   7   11.88    0.59  10
  -1   9   8  117.41    1.23  10
   0  10   5   23.43    0.65  10
   0  10   6  106.68    1.14  10
   0  10   7   74.67    1.04  10
   0  10   8   22.24    0.86  10
   1  10   2   21.66    0.61  10
   3  12   4    1.03    0.77  10
   3  12   5   41.14    0.90  10
   4   9  12   21.16    0.60  10
   4  10  11    2.90    0.56  10
   4  12   7   10.61    0.69  10
   7  11   9    0.16    0.35  10
   7  12   7   19.29    0.50  10
  10  12   4    0.52    0.22  10
  -2   7  10   59.35    0.84  10
  -1   9   5   52.52    0.75  10
  -1   9   9   14.51    0.82  10
   1  10  10    4.02    0.65  10
   1  11   5    1.62    0.58  10
   1  11   7   18.27    0.76  10
   2   9  12    0.42    0.64  10
   2  11   2   68.25    0.88  10
   3  12   3   72.70    1.05  10
   5   9  12    4.77    0.40  10
   5  10  11   11.84    0.48  10
   5  12   8    0.77    0.55  10
  -2   5  12    3.04    0.55  10
  -2   8   6  191.16    1.28  10
  -2   8   7   29.75    0.64  10
  -2   8   8  105.34    1.05  10
  -1   5  13    3.62    0.50  10
  -1   7  12  171.25    1.36  10
  -1   8  11  376.67    1.97  10
   0   9  11   31.96    0.81  10
   0  10   9    7.51    0.68  10
   1  11   4    4.40    0.59  10
   1  11   8   77.20    1.09  10
   2   6  14   21.53    0.58  10
   2  10  11    3.22    0.60  10
   3   6  14    0.94    0.38  10
   3   8  13   10.65    0.49  10
   3  11  10   34.93    0.83  10
   4   8  13    2.27    0.41  10
   4  11  10    1.86    0.49  10
   4  12   8   24.39    0.70  10
   5  11  10   10.03    0.48  10
   6  12   8   10.83    0.46  10
   6  13   3    4.97    0.55  10
   6  13   4   18.41    0.65  10
   7  13   3    1.85    0.47  10
   7  13   4    9.63    0.51  10
   8  12   7    2.86    0.30  10
   9  12   6    6.24    0.28  10
  -3   5  10   80.89    0.82  10
  -3   6   9  248.87    1.40  10
  -2   7  11   11.60    0.62  10
  -2   8   9    0.99    0.50  10
  -1   6  13   72.70    0.98  10
  -1   9  10  237.00    1.64  10
   0  10  10  123.80    1.33  10
   1   6  14    1.67    0.46  10
   1   8  13   17.61    0.70  10
   1  11   3   15.64    0.69  10
   1  11   9    3.81    0.76  10
   2  11  10    0.14    0.69  10
   2  12   4    5.23    0.77  10
   2  12   5   15.15    0.71  10
   2  12   6    5.72    0.68  10
   2  12   7    2.52    0.81  10
   3  12   2   48.42    0.88  10
   5  13   4    2.64    0.61  10
   6   9  12    1.70    0.27  10
   6  11  10   -0.18    0.34  10
   6  13   5   17.92    0.57  10
   7  12   8   14.06    0.41  10
   7  13   5   25.03    0.55  10
   8  10  10    0.14    0.10  10
   8  13   4    0.34    0.35  10
  -3   4  11  108.32    0.93  10
  -3   6  10   40.30    0.79  10
  -1  10   6    4.20    0.67  10
  -1  10   7   11.12    0.69  10
  -1  10   8    8.09    0.78  10
   0  11   6    1.27    0.73  10
   0  11   7    3.70    0.79  10
   1  10   1   29.87    0.56  10
   4  12   9   -0.22    0.56  10
   5   8  13   17.32    0.38  10
   5  12   9   10.79    0.51  10
   5  13   6   88.33    0.97  10
   8  11   9    0.54    0.11  10
  -3   5  11  132.30    1.05  10
  -3   7   8  696.48    2.31  10
  -3   7   9   40.64    0.75  10
  -2   9   7  254.32    1.58  10
  -2   9   8    0.85    0.56  10
  -1   7  13    0.86    0.62  10
  -1   9  11    5.37    0.69  10
  -1  10   5   14.19    0.64  10
  -1  10   9   28.45    0.82  10
   0  11   5    6.53    0.60  10
   0  11   8    0.34    0.64  10
   2   7  14    0.08    0.43  10
   2  10  12   13.18    0.66  10
   2  12   3    2.29    0.55  10
   3  10  12    6.42    0.48  10
   3  12   9   16.80    0.65  10
   4  10  12    3.19    0.42  10
   4  13   6    4.23    0.56  10
   6  12   9   -0.31    0.34  10
   7  13   6   13.21    0.45  10
  -3   6  11   24.95    0.65  10
  -3   7  10   15.55    0.64  10
  -2   5  13   95.65    0.97  10
  -2   7  12   62.87    0.94  10
  -2   8  11   90.04    1.07  10
  -2   9   6   26.84    0.64  10
  -2   9   9  134.55    1.29  10
   0  10   2  181.51    1.24  10
   0  10  11    4.22    0.66  10
   1   7  14   33.35    0.63  10
   1  12   5    6.17    0.73  10
   1  12   6    6.91    0.70  10
   1  12   7    8.42    0.70  10
   2   9  13   15.20    0.53  10
   2  11  11    5.39    0.62  10
   2  12   9    1.29    0.68  10
   3   9  13    7.91    0.41  10
   3  11  11    2.67    0.49  10
   4   9  13    2.77    0.35  10
   4  11  11    6.63    0.43  10
   4  13   7   53.17    0.85  10
   5  10  12    3.10    0.30  10
   5  11  11    4.23    0.36  10
   5  13   7   10.54    0.46  10
   6  13   7    3.00    0.39  10
  -3   5  12   13.59    0.61  10
  -2   6  13    2.19    0.57  10
  -2   9  10   39.72    0.86  10
  -1  10   4    4.33    0.50  10
  -1  10  10    1.77    0.64  10
   0   7  14    0.54    0.50  10
   1   9  13    0.50    0.47  10
   1  10  12    0.26    0.53  10
   1  12   4   15.10    0.79  10
   2  12   2   61.63    0.92  10
   3  13   4   19.67    0.70  10
   3  13   7   10.75    0.70  10
   4  12  10    9.78    0.50  10
  -3   6  12   32.62    0.78  10
  -3   7  11    4.68    0.56  10
  -3   8   7  135.40    1.13  10
  -3   8   9   17.05    0.62  10
  -2   8  12  297.56    1.77  10
  -1   8  13    7.73    0.59  10
  -1   9  12  184.73    1.45  10
  -1  11   7  103.94    1.27  10
  -1  11   8   39.79    0.98  10
   0  11   3    2.23    0.59  10
   1  11  11    4.30    0.59  10
   2   8  14    6.47    0.44  10
   3  12  10   -0.23    0.48  10
   3  13   3    1.35    0.60  10
   4  13   8    6.61    0.49  10
   5   9  13    0.57    0.21  10
   5  13   8   10.25    0.46  10
   7  12   9    6.32    0.24  10
   7  13   7    9.82    0.33  10
  -4   5  10    0.30    0.44  10
  -3   8   6    4.38    0.42  10
  -2   7  13    3.52    0.58  10
  -2   9   4   68.49    0.81  10
  -2   9  11  230.34    1.62  10
  -2  10   6  155.35    1.37  10
  -2  10   7   11.19    0.66  10
  -2  10   8  142.52    1.34  10
  -2  10   9   12.01    0.71  10
  -1  10   3   52.19    0.80  10
  -1  10  11   58.50    0.97  10
  -1  11   6   24.98    0.77  10
  -1  11   9    1.08    0.76  10
   0   9  13    6.97    0.56  10
   0  10  12  125.90    1.19  10
   0  12   7   -0.11    0.76  10
   1   8  14   12.95    0.50  10
   1  12   3   66.03    0.92  10
   2  12  10    3.40    0.54  10
   2  13   5    3.42    0.65  10
   3  13   8    8.39    0.56  10
   6  11  11   11.98    0.28  10
   6  13   8    3.02    0.29  10
  -4   6   9    1.46    0.40  10
  -3   5  13   85.89    0.95  10
  -3   7  12   78.19    0.99  10
  -3   8  11   22.34    0.75  10
  -3   9   8    8.30    0.68  10
  -3   9   9   50.23    0.97  10
  -2  10  10  282.59    1.85  10
  -1  11   5   13.36    0.68  10
   0   8  14   80.92    0.93  10
   0  11  11   16.25    0.71  10
   0  12   5    1.22    0.63  10
   0  12   8   24.23    0.80  10
   2  10  13    0.34    0.42  10
   2  11  12   25.54    0.63  10
   2  13   4    3.07    0.60  10
   2  13   8    9.20    0.70  10
   3  10  13    2.55    0.35  10
   3  11  12    4.00    0.38  10
   6  12  10    8.14    0.28  10
  -4   5  11  158.56    1.13  10
  -4   7   8    6.33    0.51  10
  -4   7   9   42.94    0.76  10
  -3   6  13   19.26    0.69  10
  -3   9   7   10.63    0.58  10
  -3   9  10    3.17    0.73  10
  -2   6  14    4.48    0.56  10
  -2   8  13   30.35    0.84  10
  -2   9  12    1.57    0.60  10
  -2  10   5    1.64    0.48  10
  -1  11   4   58.86    0.98  10
  -1  11  10  159.07    1.42  10
   1  10  13    3.18    0.44  10
   1  11  12   69.60    0.89  10
   2  13   3   87.57    1.09  10
   3  12  11    3.48    0.43  10
   3  13   9    1.64    0.46  10
   4  10  13    0.49    0.25  10
   4  11  12    0.37    0.27  10
   4  13   9   20.58    0.50  10
   5  13   9    1.26    0.30  10
   5  14   4    6.95    0.51  10
   5  14   5    8.75    0.50  10
   6  14   4    1.97    0.36  10
   6  14   5   10.97    0.41  10
  -4   6  11   90.79    0.96  10
  -4   7   7  121.83    1.01  10
  -4   7  10   62.23    0.87  10
  -3   9   6  123.35    1.12  10
  -2  10  11    5.18    0.65  10
  -1   8  14   20.90    0.70  10
   0  12  10   27.72    0.86  10
   1   9  14   35.14    0.63  10
   1  12   2    1.30    0.47  10
   1  13   5    0.80    0.64  10
   2   9  14    4.19    0.34  10
   2  12  11   14.38    0.53  10
   2  13   9    5.03    0.55  10
   3   9  14    1.85    0.26  10
   4  14   4    5.81    0.57  10
   4  14   5    8.35    0.49  10
   4  14   6   32.45    0.68  10
   5  14   6    5.28    0.42  10
  -4   5  12  160.97    1.17  10
  -4   6  12  111.11    1.10  10
  -4   7  11   38.10    0.78  10
  -4   8   9   25.10    0.75  10
  -3   7  13   92.02    1.03  10
  -3   9   5    5.65    0.53  10
  -3   9  11   49.86    0.93  10
  -3  10   8   18.73    0.83  10
  -2  11   7    2.88    0.66  10
  -2  11   8   11.97    0.74  10
  -2  11   9   55.12    1.03  10
  -1  10   2   17.21    0.52  10
  -1  12   7   15.73    0.77  10
  -1  12   8   -0.13    0.69  10
   0   7  15   39.27    0.63  10
   0   9  14   33.25    0.69  10
   1  12  11   22.88    0.62  10
   1  13   4    8.20    0.74  10
   3  14   5   37.96    0.80  10
   3  14   6    6.56    0.59  10
   4  14   7    8.74    0.48  10
   5  12  11    7.44    0.27  10
   6  14   6    8.09    0.35  10
   7  14   5   11.48    0.32  10
  -4   8   7   29.71    0.66  10
  -4   8  10   10.08    0.61  10
  -3  10   7   21.40    0.73  10
  -3  10  10   18.69    0.89  10
  -2  11  10    2.87    0.71  10
  -1  11   3    2.20    0.47  10
  -1  12   5    2.60    0.73  10
   0  12   3    1.04    0.53  10
   1  13   9    3.79    0.57  10
   2  13  10    0.30    0.47  10
   3  14   7   28.40    0.67  10
   4  13  10    8.20    0.34  10
   5  14   7   14.67    0.39  10
  -4   7  12  363.07    1.86  10
  -4   8   6   11.67    0.56  10
  -4   8  11  103.77    1.14  10
  -3   6  14    2.71    0.58  10
  -3   8  13    6.50    0.59  10
  -3   9  12  122.21    1.25  10
  -3  10   6   19.83    0.69  10
  -2   8  14   21.20    0.64  10
  -2  11   5    4.20    0.58  10
  -1   7  15    1.58    0.44  10
  -1   9  14   57.95    0.85  10
  -1  11  12   99.66    1.07  10
  -1  12  10   15.34    0.75  10
   0  12  11   10.48    0.59  10
   0  13   6    0.72    0.62  10
   0  13   8    0.87    0.62  10
   1   8  15    1.22    0.30  10
   1  11  13    2.04    0.42  10
   1  13   3   -1.55    0.63  10
   2  11  13    2.80    0.33  10
   2  14   6   26.89    0.79  10
   3  14   3   99.94    0.98  10
   4  14   8    1.13    0.35  10
  -5   5  10   72.65    0.85  10
  -4   5  13    8.55    0.47  10
  -4   6  13    2.85    0.60  10
  -4   8  12   11.89    0.75  10
  -4   9   7   75.61    1.02  10
  -4   9   8   34.01    0.78  10
  -4   9   9   13.44    0.69  10
  -3   7  14    3.60    0.61  10
  -3   9   4   39.66    0.68  10
  -3  10  11   26.54    0.83  10
  -2  10   3    7.33    0.48  10
  -1  12   4    3.38    0.72  10
   0   8  15    0.29    0.38  10
   0  13   9   11.03    0.65  10
   1  10  14    2.69    0.38  10
   1  12  12    7.93    0.50  10
   1  13  10    9.92    0.55  10
   2  10  14    0.66    0.27  10
   2  12  12    6.06    0.32  10
   2  14   7    1.08    0.50  10
   3  11  13   19.31    0.36  10
   3  12  12    0.72    0.24  10
   3  14   8    3.09    0.41  10
   5  14   8   -0.06    0.23  10
  -5   5  11    6.21    0.55  10
  -5   6   8   12.37    0.47  10
  -5   6  10    9.62    0.50  10
  -4   7  13    6.68    0.69  10
  -4   9  11  119.24    1.31  10
  -3  10   5    1.38    0.49  10
  -3  11   8  171.82    1.51  10
  -2  10  13   38.45    0.78  10
  -2  12   7    7.15    0.72  10
  -2  12   9   11.54    0.86  10
  -1  12  11    3.36    0.59  10
   0  10  14   10.78    0.49  10
   0  11  13   27.23    0.59  10
   0  12   2    5.90    0.50  10
   0  13   4   15.17    0.76  10
   2  14   8    2.02    0.43  10
  -5   7   8  110.64    1.02  10
  -5   7   9    1.96    0.45  10
  -5   7  10    5.35    0.54  10
  -5   7  11    4.58    0.68  10
  -4   8   5    0.79    0.35  10
  -4   9   6   71.25    0.91  10
  -4  10   9   39.06    0.99  10
  -3  11  10  205.05    1.59  10
  -2   7  15   17.41    0.57  10
  -2   9  14    6.94    0.56  10
  -2  11  12   27.60    0.72  10
  -2  12   6   92.46    1.20  10
  -1  11  13   15.53    0.62  10
  -1  13   6    4.03    0.79  10
  -1  13   7    0.57    0.69  10
   0  12  12   35.83    0.66  10
   1  13  11    0.42    0.43  10
   1  14   5    2.98    0.69  10
   1  14   6    5.09    0.61  10
   3  13  11    0.13    0.24  10
   3  14   9   10.96    0.40  10
   4  14   9    0.44    0.24  10
  -5   5  12   43.40    0.77  10
  -5   8   9    5.50    0.57  10
  -5   8  10   78.58    1.06  10
  -4   6  14   23.09    0.69  10
  -4   8  13   18.97    0.71  10
  -4  10   7   10.24    0.79  10
  -4  10   8    5.13    0.66  10
  -4  10  10   17.47    0.77  10
  -3   9   3    2.12    0.46  10
  -3  10   4  184.05    1.36  10
  -3  11   6  311.80    1.90  10
  -2  10   2  221.21    1.38  10
  -2  12   5    0.32    0.69  10
  -1  10  14   12.81    0.51  10
  -1  12   3  131.02    1.20  10
  -1  13   9    0.73    0.60  10
   0   9  15    1.96    0.34  10
   0  13   3   27.40    0.78  10
   2  14   9    0.53    0.36  10
  -5   7  12   72.17    1.00  10
  -5   8   8    1.34    0.49  10
  -5   8  11   19.61    0.75  10
  -4   7  14    4.74    0.61  10
  -4   9   5   89.76    0.97  10
  -4  10  11    1.07    0.63  10
  -3  10  13   25.17    0.79  10
  -3  11   5    2.68    0.71  10
  -2   8  15    2.37    0.47  10
  -2  11   3   27.63    0.70  10
  -2  12  11    0.54    0.59  10
  -1   9  15    0.60    0.38  10
  -1  12  12    0.10    0.47  10
  -1  13   5   42.16    0.92  10
  -1  13  10   40.12    0.79  10
   1  14   9    8.78    0.47  10
  -5   8  12   78.84    1.09  10
  -5   9  10  141.20    1.41  10
  -4  10   6   68.34    0.99  10
  -4  10  12   31.02    0.91  10
  -3   9  14   38.17    0.76  10
  -3  11  12   18.49    0.71  10
  -3  12   8   31.15    0.88  10
  -3  12   9   48.11    0.99  10
  -2  10  14   46.35    0.71  10
  -2  11  13   22.16    0.63  10
  -1  13   4   77.18    1.10  10
   0  11  14   13.79    0.43  10
   0  14   8    4.94    0.54  10
   1  11  14    0.47    0.25  10
   2  12  13    5.55    0.25  10
   2  14  10    1.96    0.32  10
   3  14  10    3.39    0.25  10
   4  15   5   22.07    0.46  10
   4  15   6    5.30    0.31  10
  -5   7  13   44.98    0.87  10
  -5   8   6   56.65    0.86  10
  -5   9   8   36.33    0.82  10
  -5   9  11  113.86    1.24  10
  -4  11   8    1.05    0.67  10
  -4  11   9   18.13    0.86  10
  -4  11  10   31.77    0.91  10
  -3  10   3  316.98    1.72  10
  -2  12  12   37.55    0.73  10
  -2  13   7    2.61    0.71  10
  -2  13   9   49.15    0.92  10
  -1  12   2   11.64    0.65  10
  -1  13  11    7.91    0.52  10
   0  12  13    1.36    0.32  10
   1  13  12    7.96    0.35  10
   1  14  10    0.83    0.39  10
   2  13  12    0.83    0.24  10
   3  15   5    0.36    0.39  10
   3  15   6    9.36    0.40  10
   3  15   7    5.88    0.34  10
  -6   6   9    4.37    0.52  10
  -5   8  13  169.05    1.41  10
  -5   9   7    6.37    0.59  10
  -5   9  12    2.30    0.80  10
  -4   9   4    3.91    0.45  10
  -4  11   7    3.78    0.68  10
  -3   8  15   99.53    0.93  10
  -2  13   6    0.82    0.64  10
  -1  11  14   11.49    0.41  10
   0  10  15    0.00    0.25  10
   0  13  12    0.74    0.38  10
   2  15   5   16.47    0.57  10
   2  15   6   14.94    0.51  10
   2  15   7    7.35    0.44  10
  -6   6   8   70.85    0.88  10
  -6   6  11   13.28    0.57  10
  -6   7   9  178.24    1.33  10
  -6   7  10    9.04    0.56  10
  -5   6  14    0.80    0.54  10
  -5   9   6   88.11    1.08  10
  -5  10   8  124.70    1.32  10
  -5  10   9   35.64    0.90  10
  -5  10  10   36.95    0.90  10
  -5  10  11   35.34    0.95  10
  -4  11   6   42.45    0.91  10
  -3  10  14    6.84    0.50  10
  -3  11  13    4.07    0.54  10
  -3  12   5   23.71    0.89  10
  -2  10   1    0.74    0.42  10
  -2  12   3   21.20    0.79  10
  -2  13   5   58.09    1.02  10
  -1  10  15    1.65    0.32  10
  -1  13   3   64.70    1.00  10
   3  15   8    1.09    0.24  10
  -6   5  12   24.54    0.71  10
  -6   6  12  210.85    1.42  10
  -6   7   8   31.09    0.67  10
  -6   7  12   11.17    0.73  10
  -6   8   9    1.19    0.60  10
  -6   8  10   30.82    0.78  10
  -6   8  11   64.25    1.07  10
  -5   7  14    9.24    0.63  10
  -5   8   5   60.03    0.81  10
  -5  10   7   22.04    0.79  10
  -4  10   4  172.97    1.40  10
  -4  11  12   49.36    0.90  10
  -3   9  15   25.68    0.61  10
  -3  12  12    2.81    0.54  10
  -2  11  14   -0.43    0.36  10
  -1  13  12    2.35    0.39  10
   1  14  11    1.68    0.28  10
   1  15   6   53.50    0.76  10
   1  15   7    2.70    0.47  10
   2  15   8    3.52    0.27  10
   2  15   8    1.11    0.17  10
  -6   7   7    9.34    0.50  10
  -6   8   8   35.34    0.77  10
  -5  10  12  119.73    1.26  10
  -4   8  15   18.14    0.64  10
  -4  11   5    2.88    0.61  10
  -4  12   7   -0.18    0.83  10
  -4  12   8  147.96    1.44  10
  -3  10   2   21.83    0.63  10
  -3  11   3   59.70    0.89  10
  -3  13   7    3.27    0.73  10
  -3  13   9    1.50    0.65  10
  -3  13  10    7.37    0.72  10
  -1  14  10    1.18    0.45  10
  -6   6  13   38.63    0.76  10
  -6   7  13  260.20    1.67  10
  -6   8  12    4.92    0.64  10
  -6   9   8    9.32    0.79  10
  -6   9   9    5.59    0.70  10
  -6   9  11   47.42    0.94  10
  -5  10   6   13.16    0.73  10
  -5  11   8   23.83    0.85  10
  -5  11   9   19.24    0.83  10
  -5  11  10   20.91    0.86  10
  -4  10  14  152.78    1.18  10
  -3  11  14   64.33    0.79  10
  -3  12   4   13.82    0.74  10
  -3  13   6   33.05    0.91  10
  -2  13  12    2.09    0.43  10
  -2  14   9    2.71    0.64  10
   0  12  14    2.29    0.24  10
   0  15   6    2.32    0.53  10
   0  15   7   52.83    0.78  10
   1  15   9    6.60    0.36  10
   2  15   9    2.42    0.25  10
  -6   7   6   26.53    0.69  10
  -6   8  13   19.34    0.83  10
  -5   8   4   99.88    0.97  10
  -5   9  14   96.36    1.10  10
  -4   9  15   19.68    0.62  10
  -4  12   6  174.96    1.55  10
  -3  12  13    5.41    0.47  10
  -3  13  11    1.17    0.54  10
  -2  12   2   95.30    1.09  10
  -2  14   6    4.04    0.67  10
  -1  12  14    1.49    0.27  10
  -1  13   2   51.84    0.82  10
   0  13  13   12.16    0.30  10
   0  15   5   23.80    0.67  10
   0  15   8    2.23    0.40  10
  -6   8   6  115.33    1.13  10
  -6   9   7   24.54    0.76  10
  -6  10  10  126.37    1.35  10
  -6  10  11  181.95    1.62  10
  -5   7  15   10.29    0.53  10
  -5  10   5   12.25    0.65  10
  -4  10   3   23.23    0.65  10
  -4  11   4  102.70    1.19  10
  -3  13   5    3.88    0.66  10
  -2  12  14   12.00    0.40  10
  -1  11  15    0.77    0.22  10
  -1  13  13    0.56    0.27  10
  -7   6   9  231.26    1.53  10
  -7   6  10    7.73    0.57  10
  -7   6  11   12.74    0.69  10
  -7   7   9    0.73    0.59  10
  -7   7  10   24.88    0.72  10
  -7   7  11   89.52    1.18  10
  -6   6  14    4.44    0.50  10
  -6   7  14    6.20    0.55  10
  -6  10   8  121.14    1.34  10
  -5   8  15   26.86    0.68  10
  -5   9   4  269.25    1.63  10
  -5  10  14   15.17    0.67  10
  -5  11   6   37.91    0.97  10
  -5  12   8    2.01    0.85  10
  -4  11  14    4.12    0.49  10
  -4  13   9   90.92    1.14  10
  -4  13  10    0.70    0.61  10
  -3  11   2  479.32    2.12  10
  -3  12   3    4.49    0.57  10
  -3  13  12    9.20    0.49  10
  -1  15   8   38.44    0.68  10
   0  14  12    4.11    0.25  10
   0  15   4    0.90    0.48  10
  -7   5   9    0.89    0.42  10
  -7   5  11    0.97    0.45  10
  -7   6   8   18.49    0.64  10
  -7   6  12    1.71    0.54  10
  -7   8   9   93.23    1.19  10
  -7   8  10   20.04    0.74  10
  -6   7   5   38.84    0.68  10
  -6   9   6   16.10    0.68  10
  -6  10   7   38.38    0.92  10
  -5  11  13    1.10    0.54  10
  -5  12   7    4.08    0.87  10
  -4   9   2   23.30    0.57  10
  -4  10  15    6.44    0.47  10
  -4  12  13    0.23    0.47  10
  -4  13  11   57.08    0.92  10
  -3   9  16    0.27    0.31  10
  -3  13   4   95.97    1.23  10
  -3  14   7   77.19    1.06  10
  -3  14   9  123.35    1.14  10
  -3  14  10   -0.30    0.55  10
  -1  15   6    2.56    0.51  10
  -1  15   9    0.12    0.39  10
   0  15  10    0.86    0.26  10
  -7   4  10   49.13    0.70  10
  -7   5   8    6.37    0.45  10
  -7   7   8   42.06    0.79  10
  -7   8   8   14.09    0.77  10
  -7   8  12    7.20    0.68  10
  -7   9  10  101.37    1.30  10
  -7   9  11   17.08    0.87  10
  -6   8   5    0.85    0.45  10
  -6  10  13    1.29    0.68  10
  -6  11   8    1.14    0.86  10
  -6  11   9    2.75    0.73  10
  -6  11  10    0.40    0.69  10
  -5   9  15    6.80    0.47  10
  -5  10   4   73.15    1.01  10
  -5  11   5   43.81    0.93  10
  -4  12   4  454.22    2.33  10
  -4  13   6    4.29    0.69  10
  -3  11  15    1.03    0.32  10
  -1  15   5    1.41    0.56  10
  -7   6   7    5.85    0.47  10
  -7   7   7   15.28    0.59  10
  -7   7  13   39.82    0.80  10
  -7   8  13   11.69    0.77  10
  -7   9   9    3.09    0.68  10
  -7   9  12   23.85    0.95  10
  -6   9   5   16.71    0.72  10
  -6  11  12   52.47    1.00  10
  -5   9   3    0.91    0.54  10
  -5  12   6   37.29    0.94  10
  -4  10   2  109.91    1.11  10
  -4  13  12    0.21    0.44  10
  -3  13  13    2.43    0.35  10
  -2  13   2  123.94    1.22  10
  -2  14  12    3.35    0.35  10
  -7   8   7   45.57    0.86  10
  -7   9   8  168.52    1.50  10
  -7  10  10  141.46    1.49  10
  -7  10  11   33.22    0.97  10
  -6   8  15   52.24    0.84  10
  -6  11   7   16.87    0.83  10
  -5  10  15   13.46    0.53  10
  -5  11  14   68.12    0.81  10
  -4   9  16    9.12    0.39  10
  -4  12  14    5.21    0.41  10
  -4  13   5  323.42    1.99  10
  -4  14   9   56.81    0.95  10
  -3  12   2   79.46    0.99  10
  -3  13   3   25.97    0.82  10
  -2  15   6    0.86    0.61  10
  -2  15   9   23.60    0.53  10
  -1  15   4   22.02    0.66  10
   1  16   6    0.22    0.26  10
  -7   7   6   17.57    0.71  10
  -7   7  14   44.38    0.85  10
  -7   9   7   48.89    0.96  10
  -7  10   8   22.23    0.95  10
  -7  10   9    3.53    0.73  10
  -6  10   5   19.12    0.83  10
  -6  10  14   36.64    0.74  10
  -6  12   8   18.26    0.96  10
  -6  12  11    0.52    0.72  10
  -5  12   5   52.85    1.08  10
  -4  11  15    4.03    0.34  10
  -4  14   7   15.49    0.81  10
  -4  14  10    6.71    0.53  10
  -3  10  16    0.55    0.22  10
  -3  11   1    2.15    0.43  10
  -8   7  10   11.07    0.79  10
  -8   7  11   40.45    0.96  10
  -7   6   6    1.68    0.41  10
  -6   9   4   21.18    0.74  10
  -5  10   3  168.39    1.38  10
  -4  11   2   26.96    0.78  10
  -4  13  13   10.70    0.43  10
  -2  15   5   95.26    1.03  10
   0  16   6   26.99    0.50  10
   0  16   7   -0.04    0.26  10
  -8   5  10   57.23    0.88  10
  -8   6   9   25.61    0.77  10
  -8   6  11    3.38    0.60  10
  -8   6  12    5.66    0.70  10
  -8   7   9  140.39    1.31  10
  -8   8  10   74.10    1.09  10
  -8   8  11    1.09    0.70  10
  -7   9   6  107.33    1.24  10
  -7  10   7    4.29    0.73  10
  -7  10  13    2.03    0.56  10
  -6  12   7    8.71    0.78  10
  -5   9  16    5.04    0.38  10
  -5  13   6    5.08    0.75  10
  -5  13  12    6.42    0.51  10
  -4  10  16    1.55    0.27  10
  -4  13   4    0.91    0.61  10
  -2  15  11   13.50    0.35  10
  -8   5   9  134.39    1.20  10
  -8   5  12   15.13    0.70  10
  -8   7   8    8.93    0.71  10
  -8   7  13   88.57    1.13  10
  -8   8   9    2.06    0.65  10
  -8   8  12   19.37    0.78  10
  -8   9  10   56.89    1.05  10
  -8   9  11   88.07    1.19  10
  -7   7   5   65.58    0.93  10
  -7   7  15   18.00    0.61  10
  -7  11   8   24.29    0.90  10
  -6  10   4  441.35    2.30  10
  -6  10  15    0.91    0.47  10
  -6  11   5    2.58    0.67  10
  -6  11  14   30.42    0.64  10
  -6  12   6    4.70    0.86  10
  -6  12  13    8.62    0.59  10
  -5   9   2  231.03    1.45  10
  -5  11   3  277.19    1.85  10
  -5  11  15   -0.27    0.33  10
  -5  12   4    3.37    0.71  10
  -5  12  14    3.38    0.38  10
  -4  10   1   67.28    0.89  10
[truncated: 1,314,468 more chars]
