# Supplementary material for: A Tail Does Not Always Make a Difference: Assembly of cds Nets from Co(NCS)2 and 1,4-bis(n-Alkyloxy)-2,5-bis(3,2′:6′,3″-terpyridin-4′-yl)benzene Ligands
Source: Molecules. 2022 Aug 5;27(15):4995. doi: 10.3390/molecules27154995 (PMC9370426; doi:10.3390/molecules27154995)
Supplement: Supplementary file 1 [file molecules-27-04995-s001.zip › CAS_119_4_150K.cif]

data_cas_119_4_150k
_audit_creation_date               2022-05-12
_audit_creation_method
;
Olex2 1.5
(compiled 2022.04.07 svn.rca3783a0 for OlexSys, GUI svn.r6498)
;
_shelx_SHELXL_version_number       '2018/3'
loop_
  _audit_author_name
  _audit_author_email
  _audit_author_address
 'Capomolla, S.' simona.capomolla@unibas.ch
;
University of Basel
Department of Chemistry
Mattenstrasse 24a
Basel
Switzerland
;
 'Prescimone, A.' alessandro.prescimone@unibas.ch
;
University of Basel
Department of Chemistry
Mattenstrasse 24a
Basel
Switzerland
;


# start Validation Reply Form
_vrf_PLAT230_cas_119_4_150k
;
PROBLEM: Hirshfeld Test Diff for O1 --C19 . 11.7 s.u.
RESPONSE: this is not unexpected: the C atom is the first of the long
alyphatic chain that had to be refined using the EADP restraints. 
This does indeed affect the shape of the thermal parameter of the C19
resulting different from that og O1.
;


_audit_contact_author_address      ?
_audit_contact_author_email        ?
_audit_contact_author_name         ''
_audit_contact_author_phone        ?
_publ_contact_author_id_orcid      ?
_publ_section_references
;
Dolomanov, O.V., Bourhis, L.J., Gildea, R.J, Howard, J.A.K. & Puschmann, H.
 (2009), J. Appl. Cryst. 42, 339-341.

Sheldrick, G.M. (2015). Acta Cryst. C71, 3-8.
;
_chemical_name_common              ?
_chemical_name_systematic          ?
_chemical_formula_moiety          
 'C54 H56 Co N8 O2 S2, 1.6(C6 H4 Cl2), 2[CH4O]'
_chemical_formula_sum              'C65.60 H70.40 Cl3.20 Co N8 O4 S2'
_chemical_formula_weight           1271.39
_chemical_melting_point            ?
loop_
  _atom_type_symbol
  _atom_type_description
  _atom_type_scat_dispersion_real
  _atom_type_scat_dispersion_imag
  _atom_type_scat_source
 'C' 'C' 0.0181 0.0091 'International Tables Vol C Tables 4.2.6.8 and 6.1.1.4'
 'Cl' 'Cl' 0.3639 0.7018 'International Tables Vol C Tables 4.2.6.8 and 6.1.1.4'
 'Co' 'Co' -2.3653 3.6143
 'International Tables Vol C Tables 4.2.6.8 and 6.1.1.4'
 'H' 'H' 0.0000 0.0000 'International Tables Vol C Tables 4.2.6.8 and 6.1.1.4'
 'N' 'N' 0.0311 0.0180 'International Tables Vol C Tables 4.2.6.8 and 6.1.1.4'
 'O' 'O' 0.0492 0.0322 'International Tables Vol C Tables 4.2.6.8 and 6.1.1.4'
 'S' 'S' 0.3331 0.5567 'International Tables Vol C Tables 4.2.6.8 and 6.1.1.4'

_shelx_space_group_comment
;
The symmetry employed for this shelxl refinement is uniquely defined
by the following loop, which should always be used as a source of
symmetry information in preference to the above space-group names.
They are only intended as comments.
;
_space_group_crystal_system        'monoclinic'
_space_group_IT_number             14
_space_group_name_H-M_alt          'P 1 21/n 1'
_space_group_name_Hall             '-P 2yn'
loop_
  _space_group_symop_operation_xyz
 'x, y, z'
 '-x+1/2, y+1/2, -z+1/2'
 '-x, -y, -z'
 'x-1/2, -y-1/2, z-1/2'

_cell_length_a                     15.2229(2)
_cell_length_b                     14.5275(2)
_cell_length_c                     16.8735(2)
_cell_angle_alpha                  90
_cell_angle_beta                   113.7470(10)
_cell_angle_gamma                  90
_cell_volume                       3415.64(8)
_cell_formula_units_Z              2
_cell_measurement_reflns_used      56982
_cell_measurement_temperature      150
_cell_measurement_theta_max        73.04
_cell_measurement_theta_min        3.17
_shelx_estimated_absorpt_T_max     0.373
_shelx_estimated_absorpt_T_min     0.292
_exptl_absorpt_coefficient_mu      4.090
_exptl_absorpt_correction_T_max    0.0379
_exptl_absorpt_correction_T_min    0.0167
_exptl_absorpt_correction_type     multi-scan
_exptl_absorpt_process_details
;
STOE X-Red32, absorption correction by Gaussian integration, analogous to
P. Coppens in: F. R. Ahmed (Editor), "Crystallographic Computing", Munksgaard,
Copenhagen (1970), 255 - 270. Afterwards scaling of reflection intensities was
performed within STOE LANA. J. Koziskova, F. Hahn, J. Richter, J. Kozisek, Acta
Chimica Slovaca, vol. 9, no. 2, 2016, pp. 136 - 140.
Finally a spherical absorption correction was done within STOE LANA.
;
_exptl_absorpt_special_details     ?
_exptl_crystal_colour              pink
_exptl_crystal_colour_primary      pink
_exptl_crystal_density_diffrn      1.236
_exptl_crystal_density_meas        ?
_exptl_crystal_density_method      'not measured'
_exptl_crystal_description         block
_exptl_crystal_F_000               1331
loop_
  _exptl_crystal_face_index_h
  _exptl_crystal_face_index_k
  _exptl_crystal_face_index_l
  _exptl_crystal_face_perp_dist
 0 1 15 0.1237
 -10 -30 -21 0.1292
 30 13 -30 0.1640
 -10 3 9 0.1531
 -1 0 0 0.0798
 4 6 5 0.1170
 -3 -2 -30 0.1386
 1 0 0 0.0875
 -29 30 -8 0.2174
 -30 -14 27 0.1961
 29 -17 -30 0.1857

_exptl_crystal_recrystallization_method 
 'The material was recrystallised from a mixture of methanol and Dichlorobenzene  by solvent layering'
_exptl_crystal_size_max            0.4
_exptl_crystal_size_mid            0.367
_exptl_crystal_size_min            0.3
_exptl_crystal_size_rad            0.330
_exptl_transmission_factor_max     ?
_exptl_transmission_factor_min     ?
_diffrn_reflns_av_R_equivalents    0.0394
_diffrn_reflns_av_unetI/netI       0.0215
_diffrn_reflns_Laue_measured_fraction_full  0.996
_diffrn_reflns_Laue_measured_fraction_max  0.983
_diffrn_reflns_limit_h_max         15
_diffrn_reflns_limit_h_min         -18
_diffrn_reflns_limit_k_max         12
_diffrn_reflns_limit_k_min         -17
_diffrn_reflns_limit_l_max         20
_diffrn_reflns_limit_l_min         -19
_diffrn_reflns_number              30773
_diffrn_reflns_point_group_measured_fraction_full  0.996
_diffrn_reflns_point_group_measured_fraction_max  0.983
_diffrn_reflns_theta_full          67.686
_diffrn_reflns_theta_max           72.910
_diffrn_reflns_theta_min           4.496
_diffrn_ambient_temperature        150
_diffrn_detector                   'EIGER2 1M'
_diffrn_detector_area_resol_mean   13.33
_diffrn_detector_type              ?
_diffrn_measured_fraction_theta_full  0.996
_diffrn_measured_fraction_theta_max  0.983
_diffrn_measurement_details
;
 2021 frames, detector distance = 40 mm
;
_diffrn_measurement_device         'Eulerian 4-circle diffractometer'
_diffrn_measurement_device_type    'STOE STADIVARI Cu'
_diffrn_measurement_method         'rotation method, \w scans'
_diffrn_radiation_collimation      '1.2 0.6 mm diameter'
_diffrn_radiation_monochromator    'Graded multilayer mirror'
_diffrn_radiation_polarisn_norm    270
_diffrn_radiation_probe            x-ray
_diffrn_radiation_type             'Cu K\a'
_diffrn_radiation_wavelength       1.54186
_diffrn_source                     'Axo Cu'
_diffrn_source_current             1.00
_diffrn_source_power               0.050
_diffrn_source_voltage             50
_reflns_Friedel_coverage           0.000
_reflns_Friedel_fraction_full      .
_reflns_Friedel_fraction_max       .
_reflns_number_gt                  6169
_reflns_number_total               6692
_reflns_special_details
;
 Reflections were merged by SHELXL according to the crystal
 class for the calculation of statistics and refinement.
 
 Structure factors included contributions from the .fab file.
 
 _reflns_Friedel_fraction is defined as the number of unique
 Friedel pairs measured divided by the number that would be
 possible theoretically, ignoring centric projections and
 systematic absences.
;
_reflns_threshold_expression       'I > 2\s(I)'
_computing_cell_refinement         'X-Area Recipe 1.37.0.0 (STOE, 2021)'
_computing_data_collection         'X-Area Pilatus3_SV 1.31.175.0 (STOE, 2021)'
_computing_data_reduction
;
X-Area Integrate 2.5.1.0 (STOE, 2021)
X-Area LANA 2.6.2.0 (STOE, 2021)
;
_computing_molecular_graphics      'Olex2 1.5 (Dolomanov et al., 2009)'
_computing_publication_material    'Olex2 1.5 (Dolomanov et al., 2009)'
_computing_structure_refinement    'SHELXL 2018/3 (Sheldrick, 2015)'
_computing_structure_solution      'olex2.solve 1.5 (Bourhis et al., 2015)'
_refine_diff_density_max           1.939
_refine_diff_density_min           -1.128
_refine_diff_density_rms           0.155
_refine_ls_extinction_coef         0.0043(4)
_refine_ls_extinction_expression  
 'Fc^*^=kFc[1+0.001xFc^2^\l^3^/sin(2\q)]^-1/4^'
_refine_ls_extinction_method       'SHELXL-2018/3 (Sheldrick 2018)'
_refine_ls_goodness_of_fit_ref     0.999
_refine_ls_hydrogen_treatment      constr
_refine_ls_matrix_type             full
_refine_ls_number_parameters       315
_refine_ls_number_reflns           6692
_refine_ls_number_restraints       60
_refine_ls_R_factor_all            0.1608
_refine_ls_R_factor_gt             0.1542
_refine_ls_restrained_S_all        0.996
_refine_ls_shift/su_max            0.000
_refine_ls_shift/su_mean           0.000
_refine_ls_structure_factor_coef   Fsqd
_refine_ls_weighting_details      
 'w=1/[\s^2^(Fo^2^)+(0.1000P)^2^+26.0000P] where P=(Fo^2^+2Fc^2^)/3'
_refine_ls_weighting_scheme        calc
_refine_ls_wR_factor_gt            0.3216
_refine_ls_wR_factor_ref           0.3251
_refine_special_details
;
the aliphatic side chain shows a lot of thermal motion.
it does not seem to be orientationally disordered in meaningful percentages.
EADP and SADI restraints were used to treat the aliphatic chain.
the modelled disordered solvent molecule is modelled with afix66 and EADP.
part of the solvent region has been treated with the solvent mask.
;
_olex2_refinement_description
;
1. Fixed Uiso
 At 1.2 times of:
  All C(H) groups, All C(H,H) groups
 At 1.5 times of:
  All C(H,H,H) groups
2. Restrained distances
 C19-C20 \\sim C21-C20 \\sim C22-C21 \\sim C23-C22 \\sim C23-C24 \\sim C25-C24
\\sim C25-C26
 with sigma of 0.02
 Cl1-C29 \\sim C38-C29
 with sigma of 0.02
3. Uiso/Uaniso restraints and constraints
Uanis(C29) = Uanis(C28) = Uanis(C33) = Uanis(C32) = Uanis(C31) = Uanis(C30)
Uanis(C35) = Uanis(C34) = Uanis(C39) = Uanis(C38) = Uanis(C37) = Uanis(C36)
Uanis(C19) = Uanis(C20) = Uanis(C21) = Uanis(C22) = Uanis(C23) = Uanis(C25) =
Uanis(C24) = Uanis(C26)
Uanis(Cl1) = Uanis(Cl2) = Uanis(Cl3) = Uanis(Cl4)
4. Rigid body (RIGU) restrains
 C19, C20, C21, C22, C23, C24, C25, C26
 with sigma for 1-2 distances of 0.004 and sigma for 1-3 distances of 0.004
5. Others
 Fixed Sof: S2(0.8) Cl1(0.5) Cl4(0.5) C28(0.5) C29(0.5) C30(0.5) H30(0.5)
 C31(0.5) H31(0.5) C32(0.5) H32(0.5) C33(0.5) H33(0.5) S1(0.2) Cl2(0.3)
 Cl3(0.3) C35(0.3) C36(0.3) H36(0.3) C37(0.3) H37(0.3) C38(0.3) H38(0.3)
 C39(0.3) H39(0.3) C34(0.3)
6.a Secondary CH2 refined with riding coordinates:
 C19(H19A,H19B), C20(H20A,H20B), C21(H21A,H21B), C22(H22A,H22B), C24(H24A,
 H24B), C25(H25A,H25B), C23(H23A,H23B)
6.b Aromatic/amide H refined with riding coordinates:
 C15(H15), C5(H5), C3(H3), C17(H17), C1(H1), C18(H18), C7(H7), C10(H10),
 C12(H12), C2(H2), C16(H16), C30(H30), C31(H31), C32(H32), C33(H33), C36(H36),
 C37(H37), C38(H38), C39(H39)
6.c Fitted hexagon refined as free rotating group:
 C28(C29,C30,C31,C32,C33), C35(C36,C37,C38,C39,C34)
6.d Idealised Me refined as rotating group:
 C26(H26A,H26B,H26C)
;
_atom_sites_solution_hydrogens     geom
_atom_sites_solution_primary       iterative
_atom_sites_solution_secondary     ?
loop_
  _atom_site_label
  _atom_site_type_symbol
  _atom_site_fract_x
  _atom_site_fract_y
  _atom_site_fract_z
  _atom_site_U_iso_or_equiv
  _atom_site_adp_type
  _atom_site_occupancy
  _atom_site_site_symmetry_order
  _atom_site_calc_flag
  _atom_site_refinement_flags_posn
  _atom_site_refinement_flags_adp
  _atom_site_refinement_flags_occupancy
  _atom_site_disorder_assembly
  _atom_site_disorder_group
 Co1 Co 0.000000 0.500000 0.000000 0.0372(4) Uani 1 2 d S . P . .
 S2 S 0.0732(2) 0.6515(3) 0.26833(19) 0.0777(9) Uani 0.8 1 d . . P A 1
 N3 N 0.3726(3) 0.0452(3) 0.5250(3) 0.0389(10) Uani 1 1 d . . . . .
 N2 N 0.1941(4) 0.2488(3) 0.3690(3) 0.0427(11) Uani 1 1 d . . . . .
 O1 O -0.0393(4) 0.3134(3) 0.4926(3) 0.0614(13) Uani 1 1 d . . . . .
 N4 N 0.0348(4) 0.5921(3) 0.1016(3) 0.0447(12) Uani 1 1 d . . . . .
 N1 N 0.0850(3) 0.3948(3) 0.0909(3) 0.0406(11) Uani 1 1 d . . . . .
 C4 C 0.1478(4) 0.3273(4) 0.2334(4) 0.0420(13) Uani 1 1 d . . . . .
 C15 C 0.3215(4) 0.1182(4) 0.4830(4) 0.0393(12) Uani 1 1 d . . . . .
 H15 H 0.337538 0.145291 0.440716 0.047 Uiso 1 1 calc R U . . .
 C14 C 0.2461(4) 0.1561(4) 0.4981(4) 0.0419(13) Uani 1 1 d . . . . .
 C5 C 0.0888(4) 0.3884(4) 0.1718(4) 0.0412(13) Uani 1 1 d . . . . .
 H5 H 0.049714 0.427168 0.187222 0.049 Uiso 1 1 calc R U . . .
 C9 C 0.0449(5) 0.4362(5) 0.4657(4) 0.0515(16) Uani 1 1 d . . . . .
 C13 C 0.1927(4) 0.2367(4) 0.4478(4) 0.0421(13) Uani 1 1 d . . . . .
 C3 C 0.2046(5) 0.2694(5) 0.2094(4) 0.0511(16) Uani 1 1 d . . . . .
 H3 H 0.245970 0.227983 0.248869 0.061 Uiso 1 1 calc R U . . .
 Cl1 Cl 0.2569(5) 0.4365(6) 0.6780(5) 0.1240(14) Uani 0.5 1 d . . P B 1
 C6 C 0.1480(4) 0.3219(4) 0.3219(4) 0.0422(13) Uani 1 1 d . . . . .
 C17 C 0.2723(5) 0.0367(5) 0.6041(4) 0.0495(15) Uani 1 1 d . . . . .
 H17 H 0.256883 0.007850 0.645961 0.059 Uiso 1 1 calc R U . . .
 C1 C 0.1400(5) 0.3362(4) 0.0687(4) 0.0494(15) Uani 1 1 d . . . . .
 H1 H 0.137415 0.338389 0.012712 0.059 Uiso 1 1 calc R U . . .
 C8 C 0.0965(5) 0.3718(4) 0.4323(4) 0.0502(16) Uani 1 1 d . . . . .
 C18 C 0.3464(5) 0.0048(4) 0.5845(4) 0.0443(14) Uani 1 1 d . . . . .
 H18 H 0.379974 -0.046957 0.613544 0.053 Uiso 1 1 calc R U . . .
 C7 C 0.1007(5) 0.3850(4) 0.3518(4) 0.0469(14) Uani 1 1 d . . . . .
 H7 H 0.071782 0.436269 0.318503 0.056 Uiso 1 1 calc R U . . .
 C10 C 0.0641(5) 0.5301(5) 0.4676(4) 0.0533(16) Uani 1 1 d . . . . .
 H10 H 0.107318 0.550893 0.445389 0.064 Uiso 1 1 calc R U . . .
 C12 C 0.1446(5) 0.2947(4) 0.4799(4) 0.0495(15) Uani 1 1 d . . . . .
 H12 H 0.143769 0.282978 0.533757 0.059 Uiso 1 1 calc R U . . .
 C2 C 0.1989(5) 0.2741(5) 0.1252(4) 0.0566(17) Uani 1 1 d . . . . .
 H2 H 0.235550 0.234539 0.107545 0.068 Uiso 1 1 calc R U . . .
 C11 C -0.0204(5) 0.4065(5) 0.4982(4) 0.0541(17) Uani 1 1 d . . . . .
 C16 C 0.2211(5) 0.1133(4) 0.5596(4) 0.0479(14) Uani 1 1 d . . . . .
 H16 H 0.170243 0.135735 0.571045 0.058 Uiso 1 1 calc R U . . .
 C19 C -0.1181(9) 0.2802(7) 0.5088(9) 0.1069(13) Uani 1 1 d D . . . .
 H19A H -0.174905 0.316327 0.476483 0.128 Uiso 1 1 calc R U . . .
 H19B H -0.104347 0.286097 0.569967 0.128 Uiso 1 1 calc R U . . .
 C20 C -0.1359(8) 0.1819(7) 0.4825(8) 0.1069(13) Uani 1 1 d D . . . .
 H20A H -0.187008 0.159886 0.498074 0.128 Uiso 1 1 calc R U . . .
 H20B H -0.159694 0.179369 0.419891 0.128 Uiso 1 1 calc R U . . .
 C21 C -0.0550(8) 0.1163(8) 0.5182(7) 0.1069(13) Uani 1 1 d D . . . .
 H21A H -0.077608 0.056798 0.491769 0.128 Uiso 1 1 calc R U . . .
 H21B H -0.005526 0.136177 0.499610 0.128 Uiso 1 1 calc R U . . .
 C26 C -0.1843(8) -0.0079(8) 0.7493(9) 0.1069(13) Uani 1 1 d D . . . .
 H26A H -0.235420 -0.025472 0.695699 0.160 Uiso 1 1 calc R U . . .
 H26B H -0.179660 0.058029 0.752606 0.160 Uiso 1 1 calc R U . . .
 H26C H -0.197355 -0.030824 0.796835 0.160 Uiso 1 1 calc R U . . .
 C22 C -0.0104(8) 0.1029(8) 0.6112(7) 0.1069(13) Uani 1 1 d D . . . .
 H22A H -0.004209 0.161834 0.639939 0.128 Uiso 1 1 calc R U . . .
 H22B H 0.053515 0.077768 0.627123 0.128 Uiso 1 1 calc R U . . .
 C24 C -0.0352(8) 0.0218(8) 0.7332(8) 0.1069(13) Uani 1 1 d D . . . .
 H24A H -0.036560 0.079042 0.762349 0.128 Uiso 1 1 calc R U . . .
 H24B H 0.030740 0.000551 0.755685 0.128 Uiso 1 1 calc R U . . .
 C25 C -0.0937(8) -0.0465(8) 0.7535(9) 0.1069(13) Uani 1 1 d D . . . .
 H25A H -0.057698 -0.070651 0.811212 0.128 Uiso 1 1 calc R U . . .
 H25B H -0.107320 -0.097328 0.712987 0.128 Uiso 1 1 calc R U . . .
 C23 C -0.0676(8) 0.0395(8) 0.6405(8) 0.1069(13) Uani 1 1 d D . . . .
 H23A H -0.132408 0.063773 0.619910 0.128 Uiso 1 1 calc R U . . .
 H23B H -0.071337 -0.019177 0.611961 0.128 Uiso 1 1 calc R U . . .
 C27 C 0.0503(5) 0.6223(5) 0.1697(4) 0.0528(16) Uani 1 1 d . . . . .
 Cl4 Cl 0.4177(5) 0.2799(5) 0.7122(5) 0.1240(14) Uani 0.5 1 d . . P B 1
 C28 C 0.3238(9) 0.2611(13) 0.7450(9) 0.113(4) Uani 0.5 1 d G . P B 1
 C29 C 0.2560(12) 0.3310(10) 0.7256(9) 0.113(4) Uani 0.5 1 d G . P B 1
 C30 C 0.1721(10) 0.3173(11) 0.7382(10) 0.113(4) Uani 0.5 1 d G . P B 1
 H30 H 0.126733 0.364100 0.725171 0.136 Uiso 0.5 1 calc R U P B 1
 C31 C 0.1560(9) 0.2337(12) 0.7701(9) 0.113(4) Uani 0.5 1 d G . P B 1
 H31 H 0.099926 0.224571 0.778545 0.136 Uiso 0.5 1 calc R U P B 1
 C32 C 0.2238(12) 0.1638(10) 0.7896(9) 0.113(4) Uani 0.5 1 d G . P B 1
 H32 H 0.213093 0.107870 0.810960 0.136 Uiso 0.5 1 calc R U P B 1
 C33 C 0.3077(10) 0.1775(11) 0.7770(9) 0.113(4) Uani 0.5 1 d G . P B 1
 H33 H 0.353069 0.130698 0.790002 0.136 Uiso 0.5 1 calc R U P B 1
 S1 S 0.0460(11) 0.7137(13) 0.2310(11) 0.101(5) Uani 0.2 1 d . . P A 2
 Cl2 Cl 0.2556(9) 0.1631(9) 0.7812(8) 0.1240(14) Uani 0.3 1 d . . P C 2
 Cl3 Cl 0.4143(9) 0.2216(9) 0.7464(8) 0.1240(14) Uani 0.3 1 d . . P C 2
 C35 C 0.2451(14) 0.2674(11) 0.7365(12) 0.076(4) Uani 0.3 1 d G . P C 2
 C36 C 0.1684(12) 0.3262(14) 0.7233(12) 0.076(4) Uani 0.3 1 d G . P C 2
 H36 H 0.118884 0.307663 0.738620 0.092 Uiso 0.3 1 calc R U P C 2
 C37 C 0.1658(11) 0.4127(13) 0.6873(12) 0.076(4) Uani 0.3 1 d G . P C 2
 H37 H 0.114545 0.452088 0.678478 0.092 Uiso 0.3 1 calc R U P C 2
 C38 C 0.2399(14) 0.4405(11) 0.6644(12) 0.076(4) Uani 0.3 1 d G . P C 2
 H38 H 0.238139 0.498350 0.640307 0.092 Uiso 0.3 1 calc R U P C 2
 C39 C 0.3165(12) 0.3816(14) 0.6776(12) 0.076(4) Uani 0.3 1 d G . P C 2
 H39 H 0.366071 0.400188 0.662277 0.092 Uiso 0.3 1 calc R U P C 2
 C34 C 0.3191(11) 0.2951(13) 0.7136(11) 0.076(4) Uani 0.3 1 d G . P C 2

loop_
  _atom_site_aniso_label
  _atom_site_aniso_U_11
  _atom_site_aniso_U_22
  _atom_site_aniso_U_33
  _atom_site_aniso_U_23
  _atom_site_aniso_U_13
  _atom_site_aniso_U_12
 Co1 0.0416(7) 0.0340(7) 0.0388(7) -0.0013(5) 0.0191(6) -0.0038(5)
 S2 0.088(2) 0.100(2) 0.0578(16) -0.0322(15) 0.0426(15) -0.0319(18)
 N3 0.041(2) 0.038(2) 0.045(3) 0.004(2) 0.025(2) 0.006(2)
 N2 0.047(3) 0.042(3) 0.043(3) 0.006(2) 0.022(2) 0.010(2)
 O1 0.080(3) 0.042(2) 0.087(4) 0.010(2) 0.059(3) 0.015(2)
 N4 0.044(3) 0.042(3) 0.052(3) 0.004(2) 0.024(2) -0.004(2)
 N1 0.045(3) 0.039(2) 0.041(2) 0.002(2) 0.021(2) 0.002(2)
 C4 0.046(3) 0.043(3) 0.042(3) 0.004(2) 0.023(3) 0.007(3)
 C15 0.041(3) 0.037(3) 0.046(3) 0.003(2) 0.023(2) 0.007(2)
 C14 0.044(3) 0.042(3) 0.044(3) 0.004(2) 0.023(3) 0.004(2)
 C5 0.047(3) 0.039(3) 0.041(3) 0.006(2) 0.022(3) 0.008(2)
 C9 0.064(4) 0.049(4) 0.055(4) 0.010(3) 0.037(3) 0.018(3)
 C13 0.048(3) 0.042(3) 0.043(3) 0.007(2) 0.024(3) 0.010(3)
 C3 0.064(4) 0.050(4) 0.049(3) 0.007(3) 0.033(3) 0.017(3)
 Cl1 0.116(3) 0.123(3) 0.112(3) 0.013(2) 0.025(2) 0.001(3)
 C6 0.047(3) 0.041(3) 0.044(3) 0.007(2) 0.024(3) 0.011(3)
 C17 0.053(4) 0.050(4) 0.053(4) 0.013(3) 0.030(3) 0.011(3)
 C1 0.059(4) 0.049(3) 0.048(3) 0.002(3) 0.031(3) 0.014(3)
 C8 0.068(4) 0.046(3) 0.046(3) 0.010(3) 0.032(3) 0.021(3)
 C18 0.046(3) 0.045(3) 0.051(4) 0.006(2) 0.029(3) 0.004(2)
 C7 0.059(4) 0.047(3) 0.044(3) 0.009(3) 0.030(3) 0.013(3)
 C10 0.069(4) 0.049(4) 0.057(4) 0.009(3) 0.041(3) 0.019(3)
 C12 0.062(4) 0.047(3) 0.050(3) 0.010(3) 0.033(3) 0.016(3)
 C2 0.073(5) 0.059(4) 0.050(4) 0.003(3) 0.037(3) 0.017(3)
 C11 0.074(4) 0.044(3) 0.059(4) 0.010(3) 0.042(4) 0.019(3)
 C16 0.052(3) 0.046(3) 0.055(4) 0.011(3) 0.032(3) 0.009(3)
 C19 0.098(3) 0.094(3) 0.130(3) 0.001(3) 0.046(3) 0.000(2)
 C20 0.098(3) 0.094(3) 0.130(3) 0.001(3) 0.046(3) 0.000(2)
 C21 0.098(3) 0.094(3) 0.130(3) 0.001(3) 0.046(3) 0.000(2)
 C26 0.098(3) 0.094(3) 0.130(3) 0.001(3) 0.046(3) 0.000(2)
 C22 0.098(3) 0.094(3) 0.130(3) 0.001(3) 0.046(3) 0.000(2)
 C24 0.098(3) 0.094(3) 0.130(3) 0.001(3) 0.046(3) 0.000(2)
 C25 0.098(3) 0.094(3) 0.130(3) 0.001(3) 0.046(3) 0.000(2)
 C23 0.098(3) 0.094(3) 0.130(3) 0.001(3) 0.046(3) 0.000(2)
 C27 0.051(4) 0.067(4) 0.048(4) -0.020(3) 0.027(3) -0.018(3)
 Cl4 0.116(3) 0.123(3) 0.112(3) 0.013(2) 0.025(2) 0.001(3)
 C28 0.099(7) 0.166(11) 0.082(6) -0.059(7) 0.044(6) -0.064(7)
 C29 0.099(7) 0.166(11) 0.082(6) -0.059(7) 0.044(6) -0.064(7)
 C30 0.099(7) 0.166(11) 0.082(6) -0.059(7) 0.044(6) -0.064(7)
 C31 0.099(7) 0.166(11) 0.082(6) -0.059(7) 0.044(6) -0.064(7)
 C32 0.099(7) 0.166(11) 0.082(6) -0.059(7) 0.044(6) -0.064(7)
 C33 0.099(7) 0.166(11) 0.082(6) -0.059(7) 0.044(6) -0.064(7)
 S1 0.099(10) 0.117(12) 0.109(11) -0.070(10) 0.063(9) -0.024(9)
 Cl2 0.116(3) 0.123(3) 0.112(3) 0.013(2) 0.025(2) 0.001(3)
 Cl3 0.116(3) 0.123(3) 0.112(3) 0.013(2) 0.025(2) 0.001(3)
 C35 0.070(7) 0.087(8) 0.053(6) -0.035(6) 0.005(5) 0.011(7)
 C36 0.070(7) 0.087(8) 0.053(6) -0.035(6) 0.005(5) 0.011(7)
 C37 0.070(7) 0.087(8) 0.053(6) -0.035(6) 0.005(5) 0.011(7)
 C38 0.070(7) 0.087(8) 0.053(6) -0.035(6) 0.005(5) 0.011(7)
 C39 0.070(7) 0.087(8) 0.053(6) -0.035(6) 0.005(5) 0.011(7)
 C34 0.070(7) 0.087(8) 0.053(6) -0.035(6) 0.005(5) 0.011(7)

_geom_special_details
;
 All esds (except the esd in the dihedral angle between two l.s. planes)
 are estimated using the full covariance matrix.  The cell esds are taken
 into account individually in the estimation of esds in distances, angles
 and torsion angles; correlations between esds in cell parameters are only
 used when they are defined by crystal symmetry.  An approximate (isotropic)
 treatment of cell esds is used for estimating esds involving l.s. planes.
;
loop_
  _geom_bond_atom_site_label_1
  _geom_bond_atom_site_label_2
  _geom_bond_distance
  _geom_bond_site_symmetry_2
  _geom_bond_publ_flag
 Co1 N3 2.243(4) 4_565 ?
 Co1 N3 2.243(4) 2 ?
 Co1 N4 2.068(5) 3_565 ?
 Co1 N4 2.068(5) . ?
 Co1 N1 2.182(5) 3_565 ?
 Co1 N1 2.182(5) . ?
 S2 C27 1.613(7) . ?
 N3 C15 1.337(7) . ?
 N3 C18 1.355(7) . ?
 N2 C13 1.349(7) . ?
 N2 C6 1.344(7) . ?
 O1 C11 1.377(8) . ?
 O1 C19 1.418(12) . ?
 N4 C27 1.164(8) . ?
 N1 C5 1.346(7) . ?
 N1 C1 1.349(7) . ?
 C4 C5 1.387(8) . ?
 C4 C3 1.378(8) . ?
 C4 C6 1.494(8) . ?
 C15 H15 0.9300 . ?
 C15 C14 1.385(8) . ?
 C14 C13 1.482(8) . ?
 C14 C16 1.388(8) . ?
 C5 H5 0.9300 . ?
 C9 C8 1.473(8) . ?
 C9 C10 1.392(9) . ?
 C9 C11 1.384(9) . ?
 C13 C12 1.363(8) . ?
 C3 H3 0.9300 . ?
 C3 C2 1.390(8) . ?
 Cl1 C29 1.733(15) . ?
 C6 C7 1.380(8) . ?
 C17 H17 0.9300 . ?
 C17 C18 1.376(8) . ?
 C17 C16 1.392(8) . ?
 C1 H1 0.9300 . ?
 C1 C2 1.355(9) . ?
 C8 C7 1.399(8) . ?
 C8 C12 1.401(8) . ?
 C18 H18 0.9300 . ?
 C7 H7 0.9300 . ?
 C10 H10 0.9300 . ?
 C10 C11 1.390(8) 3_566 ?
 C12 H12 0.9300 . ?
 C2 H2 0.9300 . ?
 C16 H16 0.9300 . ?
 C19 H19A 0.9700 . ?
 C19 H19B 0.9700 . ?
 C19 C20 1.488(11) . ?
 C20 H20A 0.9700 . ?
 C20 H20B 0.9700 . ?
 C20 C21 1.479(11) . ?
 C21 H21A 0.9700 . ?
 C21 H21B 0.9700 . ?
 C21 C22 1.449(11) . ?
 C26 H26A 0.9600 . ?
 C26 H26B 0.9600 . ?
 C26 H26C 0.9600 . ?
 C26 C25 1.464(11) . ?
 C22 H22A 0.9700 . ?
 C22 H22B 0.9700 . ?
 C22 C23 1.484(11) . ?
 C24 H24A 0.9700 . ?
 C24 H24B 0.9700 . ?
 C24 C25 1.464(11) . ?
 C24 C23 1.461(11) . ?
 C25 H25A 0.9700 . ?
 C25 H25B 0.9700 . ?
 C23 H23A 0.9700 . ?
 C23 H23B 0.9700 . ?
 C27 S1 1.700(13) . ?
 Cl4 C28 1.750(13) . ?
 C28 C29 1.3900 . ?
 C28 C33 1.3900 . ?
 C29 C30 1.3900 . ?
 C30 H30 0.9300 . ?
 C30 C31 1.3900 . ?
 C31 H31 0.9300 . ?
 C31 C32 1.3900 . ?
 C32 H32 0.9300 . ?
 C32 C33 1.3900 . ?
 C33 H33 0.9300 . ?
 Cl2 C35 1.67(2) . ?
 Cl3 C34 1.703(18) . ?
 C35 C36 1.3900 . ?
 C35 C34 1.3900 . ?
 C36 H36 0.9300 . ?
 C36 C37 1.3900 . ?
 C37 H37 0.9300 . ?
 C37 C38 1.3900 . ?
 C38 H38 0.9300 . ?
 C38 C39 1.3900 . ?
 C39 H39 0.9300 . ?
 C39 C34 1.3900 . ?

loop_
  _geom_angle_atom_site_label_1
  _geom_angle_atom_site_label_2
  _geom_angle_atom_site_label_3
  _geom_angle
  _geom_angle_site_symmetry_1
  _geom_angle_site_symmetry_3
  _geom_angle_publ_flag
 N3 Co1 N3 180.0(3) 4_565 2 ?
 N4 Co1 N3 89.20(18) . 4_565 ?
 N4 Co1 N3 90.80(18) . 2 ?
 N4 Co1 N3 89.20(18) 3_565 2 ?
 N4 Co1 N3 90.80(18) 3_565 4_565 ?
 N4 Co1 N4 180.0 . 3_565 ?
 N4 Co1 N1 90.62(19) . 3_565 ?
 N4 Co1 N1 89.38(19) . . ?
 N4 Co1 N1 89.38(19) 3_565 3_565 ?
 N4 Co1 N1 90.62(19) 3_565 . ?
 N1 Co1 N3 91.42(18) . 2 ?
 N1 Co1 N3 88.58(18) 3_565 2 ?
 N1 Co1 N3 91.42(18) 3_565 4_565 ?
 N1 Co1 N3 88.58(18) . 4_565 ?
 N1 Co1 N1 180.0 . 3_565 ?
 C15 N3 Co1 119.7(4) . 2_545 ?
 C15 N3 C18 117.0(5) . . ?
 C18 N3 Co1 123.2(4) . 2_545 ?
 C6 N2 C13 118.3(5) . . ?
 C11 O1 C19 119.4(6) . . ?
 C27 N4 Co1 161.1(5) . . ?
 C5 N1 Co1 122.2(4) . . ?
 C5 N1 C1 117.3(5) . . ?
 C1 N1 Co1 120.4(4) . . ?
 C5 C4 C6 121.5(5) . . ?
 C3 C4 C5 117.6(5) . . ?
 C3 C4 C6 120.9(5) . . ?
 N3 C15 H15 117.8 . . ?
 N3 C15 C14 124.5(5) . . ?
 C14 C15 H15 117.8 . . ?
 C15 C14 C13 120.9(5) . . ?
 C15 C14 C16 117.1(5) . . ?
 C16 C14 C13 122.0(5) . . ?
 N1 C5 C4 123.7(5) . . ?
 N1 C5 H5 118.1 . . ?
 C4 C5 H5 118.1 . . ?
 C10 C9 C8 119.5(6) . . ?
 C11 C9 C8 122.1(6) . . ?
 C11 C9 C10 118.3(6) . . ?
 N2 C13 C14 116.4(5) . . ?
 N2 C13 C12 122.3(5) . . ?
 C12 C13 C14 121.3(5) . . ?
 C4 C3 H3 120.6 . . ?
 C4 C3 C2 118.8(6) . . ?
 C2 C3 H3 120.6 . . ?
 N2 C6 C4 115.0(5) . . ?
 N2 C6 C7 122.2(5) . . ?
 C7 C6 C4 122.7(5) . . ?
 C18 C17 H17 120.8 . . ?
 C18 C17 C16 118.4(6) . . ?
 C16 C17 H17 120.8 . . ?
 N1 C1 H1 118.9 . . ?
 N1 C1 C2 122.3(6) . . ?
 C2 C1 H1 118.9 . . ?
 C7 C8 C9 121.7(6) . . ?
 C7 C8 C12 116.7(5) . . ?
 C12 C8 C9 121.7(5) . . ?
 N3 C18 C17 123.1(6) . . ?
 N3 C18 H18 118.5 . . ?
 C17 C18 H18 118.5 . . ?
 C6 C7 C8 119.9(6) . . ?
 C6 C7 H7 120.0 . . ?
 C8 C7 H7 120.0 . . ?
 C9 C10 H10 119.1 . . ?
 C11 C10 C9 121.9(6) 3_566 . ?
 C11 C10 H10 119.1 3_566 . ?
 C13 C12 C8 120.5(6) . . ?
 C13 C12 H12 119.8 . . ?
 C8 C12 H12 119.8 . . ?
 C3 C2 H2 119.9 . . ?
 C1 C2 C3 120.2(6) . . ?
 C1 C2 H2 119.9 . . ?
 O1 C11 C9 116.3(6) . . ?
 O1 C11 C10 123.9(6) . 3_566 ?
 C9 C11 C10 119.8(7) . 3_566 ?
 C14 C16 C17 119.9(6) . . ?
 C14 C16 H16 120.0 . . ?
 C17 C16 H16 120.0 . . ?
 O1 C19 H19A 109.8 . . ?
 O1 C19 H19B 109.8 . . ?
 O1 C19 C20 109.6(9) . . ?
 H19A C19 H19B 108.2 . . ?
 C20 C19 H19A 109.8 . . ?
 C20 C19 H19B 109.8 . . ?
 C19 C20 H20A 107.7 . . ?
 C19 C20 H20B 107.7 . . ?
 H20A C20 H20B 107.1 . . ?
 C21 C20 C19 118.4(10) . . ?
 C21 C20 H20A 107.7 . . ?
 C21 C20 H20B 107.7 . . ?
 C20 C21 H21A 107.7 . . ?
 C20 C21 H21B 107.7 . . ?
 H21A C21 H21B 107.1 . . ?
 C22 C21 C20 118.6(11) . . ?
 C22 C21 H21A 107.7 . . ?
 C22 C21 H21B 107.7 . . ?
 H26A C26 H26B 109.5 . . ?
 H26A C26 H26C 109.5 . . ?
 H26B C26 H26C 109.5 . . ?
 C25 C26 H26A 109.5 . . ?
 C25 C26 H26B 109.5 . . ?
 C25 C26 H26C 109.5 . . ?
 C21 C22 H22A 109.4 . . ?
 C21 C22 H22B 109.4 . . ?
 C21 C22 C23 111.2(11) . . ?
 H22A C22 H22B 108.0 . . ?
 C23 C22 H22A 109.4 . . ?
 C23 C22 H22B 109.4 . . ?
 H24A C24 H24B 107.7 . . ?
 C25 C24 H24A 108.9 . . ?
 C25 C24 H24B 108.9 . . ?
 C23 C24 H24A 108.9 . . ?
 C23 C24 H24B 108.9 . . ?
 C23 C24 C25 113.3(10) . . ?
 C26 C25 H25A 109.2 . . ?
 C26 C25 H25B 109.2 . . ?
 C24 C25 C26 112.2(10) . . ?
 C24 C25 H25A 109.2 . . ?
 C24 C25 H25B 109.2 . . ?
 H25A C25 H25B 107.9 . . ?
 C22 C23 H23A 107.7 . . ?
 C22 C23 H23B 107.7 . . ?
 C24 C23 C22 118.4(11) . . ?
 C24 C23 H23A 107.7 . . ?
 C24 C23 H23B 107.7 . . ?
 H23A C23 H23B 107.1 . . ?
 N4 C27 S2 173.0(7) . . ?
 N4 C27 S1 148.7(10) . . ?
 C29 C28 Cl4 115.8(11) . . ?
 C29 C28 C33 120.0 . . ?
 C33 C28 Cl4 123.6(11) . . ?
 C28 C29 Cl1 127.7(10) . . ?
 C30 C29 Cl1 112.1(10) . . ?
 C30 C29 C28 120.0 . . ?
 C29 C30 H30 120.0 . . ?
 C31 C30 C29 120.0 . . ?
 C31 C30 H30 120.0 . . ?
 C30 C31 H31 120.0 . . ?
 C30 C31 C32 120.0 . . ?
 C32 C31 H31 120.0 . . ?
 C31 C32 H32 120.0 . . ?
 C33 C32 C31 120.0 . . ?
 C33 C32 H32 120.0 . . ?
 C28 C33 H33 120.0 . . ?
 C32 C33 C28 120.0 . . ?
 C32 C33 H33 120.0 . . ?
 C36 C35 Cl2 123.5(13) . . ?
 C36 C35 C34 120.0 . . ?
 C34 C35 Cl2 116.5(13) . . ?
 C35 C36 H36 120.0 . . ?
 C35 C36 C37 120.0 . . ?
 C37 C36 H36 120.0 . . ?
 C36 C37 H37 120.0 . . ?
 C36 C37 C38 120.0 . . ?
 C38 C37 H37 120.0 . . ?
 C37 C38 H38 120.0 . . ?
 C39 C38 C37 120.0 . . ?
 C39 C38 H38 120.0 . . ?
 C38 C39 H39 120.0 . . ?
 C34 C39 C38 120.0 . . ?
 C34 C39 H39 120.0 . . ?
 C35 C34 Cl3 114.0(13) . . ?
 C39 C34 Cl3 125.4(13) . . ?
 C39 C34 C35 120.0 . . ?

loop_
  _geom_torsion_atom_site_label_1
  _geom_torsion_atom_site_label_2
  _geom_torsion_atom_site_label_3
  _geom_torsion_atom_site_label_4
  _geom_torsion
  _geom_torsion_site_symmetry_1
  _geom_torsion_site_symmetry_2
  _geom_torsion_site_symmetry_3
  _geom_torsion_site_symmetry_4
  _geom_torsion_publ_flag
 Co1 N3 C15 C14 -175.0(5) 2_545 . . . ?
 Co1 N3 C18 C17 175.3(5) 2_545 . . . ?
 Co1 N4 C27 S1 -147.0(14) . . . . ?
 Co1 N1 C5 C4 -174.7(5) . . . . ?
 Co1 N1 C1 C2 175.3(6) . . . . ?
 N3 C15 C14 C13 -179.4(6) . . . . ?
 N3 C15 C14 C16 -1.8(9) . . . . ?
 N2 C13 C12 C8 -1.9(11) . . . . ?
 N2 C6 C7 C8 -2.7(10) . . . . ?
 O1 C19 C20 C21 53.7(15) . . . . ?
 N1 C1 C2 C3 -0.3(11) . . . . ?
 C4 C3 C2 C1 1.5(11) . . . . ?
 C4 C6 C7 C8 174.4(6) . . . . ?
 C15 N3 C18 C17 -1.6(9) . . . . ?
 C15 C14 C13 N2 24.4(9) . . . . ?
 C15 C14 C13 C12 -155.8(6) . . . . ?
 C15 C14 C16 C17 1.2(10) . . . . ?
 C14 C13 C12 C8 178.4(6) . . . . ?
 C5 N1 C1 C2 -1.4(10) . . . . ?
 C5 C4 C3 C2 -1.0(10) . . . . ?
 C5 C4 C6 N2 167.9(6) . . . . ?
 C5 C4 C6 C7 -9.4(10) . . . . ?
 C9 C8 C7 C6 -178.5(7) . . . . ?
 C9 C8 C12 C13 -179.3(7) . . . . ?
 C13 N2 C6 C4 -176.4(5) . . . . ?
 C13 N2 C6 C7 0.9(9) . . . . ?
 C13 C14 C16 C17 178.7(6) . . . . ?
 C3 C4 C5 N1 -0.8(10) . . . . ?
 C3 C4 C6 N2 -10.2(9) . . . . ?
 C3 C4 C6 C7 172.5(7) . . . . ?
 Cl1 C29 C30 C31 175.5(10) . . . . ?
 C6 N2 C13 C14 -178.8(5) . . . . ?
 C6 N2 C13 C12 1.4(9) . . . . ?
 C6 C4 C5 N1 -178.9(6) . . . . ?
 C6 C4 C3 C2 177.1(6) . . . . ?
 C1 N1 C5 C4 2.0(9) . . . . ?
 C8 C9 C10 C11 -177.3(7) . . . 3_566 ?
 C8 C9 C11 O1 -4.0(10) . . . . ?
 C8 C9 C11 C10 177.3(7) . . . 3_566 ?
 C18 N3 C15 C14 2.0(9) . . . . ?
 C18 C17 C16 C14 -0.8(10) . . . . ?
 C7 C8 C12 C13 0.0(11) . . . . ?
 C10 C9 C8 C7 -51.4(10) . . . . ?
 C10 C9 C8 C12 127.9(8) . . . . ?
 C10 C9 C11 O1 178.0(6) . . . . ?
 C10 C9 C11 C10 -0.7(12) . . . 3_566 ?
 C12 C8 C7 C6 2.1(10) . . . . ?
 C11 O1 C19 C20 169.1(8) . . . . ?
 C11 C9 C8 C7 130.7(8) . . . . ?
 C11 C9 C8 C12 -50.0(11) . . . . ?
 C11 C9 C10 C11 0.7(12) . . . 3_566 ?
 C16 C14 C13 N2 -153.1(6) . . . . ?
 C16 C14 C13 C12 26.7(10) . . . . ?
 C16 C17 C18 N3 1.0(10) . . . . ?
 C19 O1 C11 C9 -168.0(8) . . . . ?
 C19 O1 C11 C10 10.7(12) . . . 3_566 ?
 C19 C20 C21 C22 61.3(16) . . . . ?
 C20 C21 C22 C23 80.0(14) . . . . ?
 C21 C22 C23 C24 -177.1(11) . . . . ?
 C25 C24 C23 C22 -176.0(10) . . . . ?
 C23 C24 C25 C26 -78.2(14) . . . . ?
 Cl4 C28 C29 Cl1 -3.6(12) . . . . ?
 Cl4 C28 C29 C30 171.2(9) . . . . ?
 Cl4 C28 C33 C32 -170.4(10) . . . . ?
 C28 C29 C30 C31 0.0 . . . . ?
 C29 C28 C33 C32 0.0 . . . . ?
 C29 C30 C31 C32 0.0 . . . . ?
 C30 C31 C32 C33 0.0 . . . . ?
 C31 C32 C33 C28 0.0 . . . . ?
 C33 C28 C29 Cl1 -174.8(12) . . . . ?
 C33 C28 C29 C30 0.0 . . . . ?
 Cl2 C35 C36 C37 178.7(15) . . . . ?
 Cl2 C35 C34 Cl3 -6.7(13) . . . . ?
 Cl2 C35 C34 C39 -178.8(14) . . . . ?
 C35 C36 C37 C38 0.0 . . . . ?
 C36 C35 C34 Cl3 172.1(12) . . . . ?
 C36 C35 C34 C39 0.0 . . . . ?
 C36 C37 C38 C39 0.0 . . . . ?
 C37 C38 C39 C34 0.0 . . . . ?
 C38 C39 C34 Cl3 -171.1(14) . . . . ?
 C38 C39 C34 C35 0.0 . . . . ?
 C34 C35 C36 C37 0.0 . . . . ?

_smtbx_masks_special_details       ?
loop_
  _smtbx_masks_void_nr
  _smtbx_masks_void_average_x
  _smtbx_masks_void_average_y
  _smtbx_masks_void_average_z
  _smtbx_masks_void_volume
  _smtbx_masks_void_count_electrons
  _smtbx_masks_void_content
 1 0.000 0.000 0.000 259.7 33.6 '2 CH4O'
 2 0.500 0.500 0.500 259.7 33.6 '2 CH4O'

_smtbx_masks_void_probe_radius     1.2
_smtbx_masks_void_truncation_radius  1.2
_shelx_res_file
;
TITL
    cas_119_4_150k.res
    created by SHELXL-2018/3 at 16:16:26 on 12-May-2022
CELL 1.54186 15.2229 14.5275 16.8735 90 113.747 90
ZERR 2 0.0002 0.0002 0.0002 0 0.001 0
LATT 1
SYMM 0.5-X,0.5+Y,0.5-Z
SFAC C Cl Co H N O S
UNIT 131.2 6.4 2 140.8 16 8 4
EADP C29 C28 C33 C32 C31 C30
SADI C19 C20 C21 C20 C22 C21 C23 C22 C23 C24 C25 C24 C25 C26
RIGU C19 C20 C21 C22 C23 C24 C25 C26
SADI Cl1 C29 C38 C29
EADP C35 C34 C39 C38 C37 C36
EADP C19 C20 C21 C22 C23 C25 C24 C26
EADP Cl1 Cl2 Cl3 Cl4

L.S. 15
PLAN  2
SIZE 0.3 0.367 0.4
CONF
MORE -1
BOND $H
ABIN
fmap 2
acta
OMIT -1 0 3
REM <olex2.extras>
REM <HklSrc "%./CAS_119_4_150K.hkl">
REM </olex2.extras>

WGHT    0.100000   26.000000
EXTI    0.004324
FVAR       0.38116
CO1   3    0.000000    0.500000    0.000000    10.50000    0.04156    0.03396 =
         0.03878   -0.00130    0.01909   -0.00384
PART 1
S2    7    0.073242    0.651508    0.268328    10.80000    0.08839    0.09962 =
         0.05781   -0.03218    0.04256   -0.03189
PART 0
N3    5    0.372625    0.045248    0.525047    11.00000    0.04087    0.03785 =
         0.04516    0.00412    0.02479    0.00586
N2    5    0.194095    0.248803    0.369039    11.00000    0.04692    0.04214 =
         0.04322    0.00628    0.02236    0.00996
O1    6   -0.039348    0.313415    0.492574    11.00000    0.07985    0.04239 =
         0.08678    0.01004    0.05928    0.01545
N4    5    0.034825    0.592068    0.101567    11.00000    0.04398    0.04213 =
         0.05230    0.00432    0.02399   -0.00365
N1    5    0.084966    0.394797    0.090851    11.00000    0.04540    0.03906 =
         0.04080    0.00188    0.02080    0.00199
C4    1    0.147819    0.327302    0.233386    11.00000    0.04600    0.04287 =
         0.04242    0.00366    0.02321    0.00735
C15   1    0.321457    0.118174    0.483002    11.00000    0.04078    0.03656 =
         0.04611    0.00265    0.02321    0.00689
AFIX  43
H15   4    0.337538    0.145291    0.440716    11.00000   -1.20000
AFIX   0
C14   1    0.246135    0.156113    0.498100    11.00000    0.04441    0.04184 =
         0.04448    0.00386    0.02305    0.00436
C5    1    0.088828    0.388406    0.171755    11.00000    0.04743    0.03906 =
         0.04091    0.00602    0.02165    0.00802
AFIX  43
H5    4    0.049714    0.427168    0.187222    11.00000   -1.20000
AFIX   0
C9    1    0.044890    0.436244    0.465744    11.00000    0.06363    0.04860 =
         0.05514    0.00972    0.03729    0.01777
C13   1    0.192658    0.236657    0.447760    11.00000    0.04759    0.04202 =
         0.04278    0.00650    0.02443    0.01031
C3    1    0.204580    0.269428    0.209413    11.00000    0.06422    0.04999 =
         0.04860    0.00657    0.03258    0.01726
AFIX  43
H3    4    0.245970    0.227983    0.248869    11.00000   -1.20000
AFIX   0

PART 1
CL1   2    0.256916    0.436484    0.677961    10.50000    0.11639    0.12304 =
         0.11209    0.01271    0.02465    0.00138

PART 0
C6    1    0.147962    0.321944    0.321873    11.00000    0.04701    0.04091 =
         0.04446    0.00706    0.02448    0.01136
C17   1    0.272339    0.036724    0.604070    11.00000    0.05329    0.05000 =
         0.05337    0.01347    0.03003    0.01116
AFIX  43
H17   4    0.256883    0.007850    0.645961    11.00000   -1.20000
AFIX   0
C1    1    0.139977    0.336162    0.068684    11.00000    0.05939    0.04925 =
         0.04841    0.00238    0.03094    0.01382
AFIX  43
H1    4    0.137415    0.338389    0.012712    11.00000   -1.20000
AFIX   0
C8    1    0.096500    0.371764    0.432295    11.00000    0.06753    0.04588 =
         0.04635    0.01011    0.03244    0.02104
C18   1    0.346373    0.004803    0.584546    11.00000    0.04618    0.04488 =
         0.05089    0.00573    0.02905    0.00395
AFIX  43
H18   4    0.379974   -0.046957    0.613544    11.00000   -1.20000
AFIX   0
C7    1    0.100745    0.385017    0.351799    11.00000    0.05870    0.04696 =
         0.04363    0.00885    0.02951    0.01273
AFIX  43
H7    4    0.071782    0.436269    0.318503    11.00000   -1.20000
AFIX   0
C10   1    0.064058    0.530063    0.467619    11.00000    0.06881    0.04851 =
         0.05725    0.00931    0.04054    0.01880
AFIX  43
H10   4    0.107318    0.550893    0.445389    11.00000   -1.20000
AFIX   0
C12   1    0.144610    0.294670    0.479878    11.00000    0.06159    0.04704 =
         0.04958    0.01022    0.03251    0.01629
AFIX  43
H12   4    0.143769    0.282978    0.533757    11.00000   -1.20000
AFIX   0
C2    1    0.198858    0.274111    0.125180    11.00000    0.07341    0.05876 =
         0.04972    0.00314    0.03740    0.01674
AFIX  43
H2    4    0.235550    0.234539    0.107545    11.00000   -1.20000
AFIX   0
C11   1   -0.020413    0.406456    0.498242    11.00000    0.07420    0.04372 =
         0.05895    0.00994    0.04189    0.01890
C16   1    0.221146    0.113291    0.559582    11.00000    0.05229    0.04640 =
         0.05512    0.01143    0.03203    0.00885
AFIX  43
H16   4    0.170243    0.135735    0.571045    11.00000   -1.20000
AFIX   0
C19   1   -0.118124    0.280181    0.508843    11.00000    0.09757    0.09400 =
         0.12952    0.00059    0.04623   -0.00013
AFIX  23
H19A  4   -0.174905    0.316327    0.476483    11.00000   -1.20000
H19B  4   -0.104347    0.286097    0.569967    11.00000   -1.20000
AFIX   0
C20   1   -0.135890    0.181863    0.482517    11.00000    0.09757    0.09400 =
         0.12952    0.00059    0.04623   -0.00013
AFIX  23
H20A  4   -0.187008    0.159886    0.498074    11.00000   -1.20000
H20B  4   -0.159694    0.179369    0.419891    11.00000   -1.20000
AFIX   0
C21   1   -0.055022    0.116285    0.518244    11.00000    0.09757    0.09400 =
         0.12952    0.00059    0.04623   -0.00013
AFIX  23
H21A  4   -0.077608    0.056798    0.491769    11.00000   -1.20000
H21B  4   -0.005526    0.136177    0.499610    11.00000   -1.20000
AFIX   0
C26   1   -0.184344   -0.007874    0.749303    11.00000    0.09757    0.09400 =
         0.12952    0.00059    0.04623   -0.00013
AFIX 137
H26A  4   -0.235420   -0.025472    0.695699    11.00000   -1.50000
H26B  4   -0.179660    0.058029    0.752606    11.00000   -1.50000
H26C  4   -0.197355   -0.030824    0.796835    11.00000   -1.50000
AFIX   0
C22   1   -0.010378    0.102903    0.611157    11.00000    0.09757    0.09400 =
         0.12952    0.00059    0.04623   -0.00013
AFIX  23
H22A  4   -0.004209    0.161834    0.639939    11.00000   -1.20000
H22B  4    0.053515    0.077768    0.627123    11.00000   -1.20000
AFIX   0
C24   1   -0.035223    0.021815    0.733238    11.00000    0.09757    0.09400 =
         0.12952    0.00059    0.04623   -0.00013
AFIX  23
H24A  4   -0.036560    0.079042    0.762349    11.00000   -1.20000
H24B  4    0.030740    0.000551    0.755685    11.00000   -1.20000
AFIX   0
C25   1   -0.093727   -0.046549    0.753526    11.00000    0.09757    0.09400 =
         0.12952    0.00059    0.04623   -0.00013
AFIX  23
H25A  4   -0.057698   -0.070651    0.811212    11.00000   -1.20000
H25B  4   -0.107320   -0.097328    0.712987    11.00000   -1.20000
AFIX   0
C23   1   -0.067642    0.039529    0.640520    11.00000    0.09757    0.09400 =
         0.12952    0.00059    0.04623   -0.00013
AFIX  23
H23A  4   -0.132408    0.063773    0.619910    11.00000   -1.20000
H23B  4   -0.071337   -0.019177    0.611961    11.00000   -1.20000
AFIX   0
C27   1    0.050285    0.622316    0.169744    11.00000    0.05123    0.06671 =
         0.04769   -0.01998    0.02735   -0.01752

PART 1
CL4   2    0.417698    0.279871    0.712230    10.50000    0.11639    0.12304 =
         0.11209    0.01271    0.02465    0.00138
AFIX  66
C28   1    0.323765    0.261078    0.745029    10.50000    0.09862    0.16582 =
         0.08187   -0.05879    0.04416   -0.06367
C29   1    0.255962    0.330997    0.725608    10.50000    0.09862    0.16582 =
         0.08187   -0.05879    0.04416   -0.06367
C30   1    0.172098    0.317319    0.738165    10.50000    0.09862    0.16582 =
         0.08187   -0.05879    0.04416   -0.06367
AFIX  43
H30   4    0.126733    0.364100    0.725171    10.50000   -1.20000
AFIX  65
C31   1    0.156037    0.233722    0.770143    10.50000    0.09862    0.16582 =
         0.08187   -0.05879    0.04416   -0.06367
AFIX  43
H31   4    0.099926    0.224571    0.778545    10.50000   -1.20000
AFIX  65
C32   1    0.223840    0.163802    0.789565    10.50000    0.09862    0.16582 =
         0.08187   -0.05879    0.04416   -0.06367
AFIX  43
H32   4    0.213093    0.107870    0.810960    10.50000   -1.20000
AFIX  65
C33   1    0.307704    0.177479    0.777008    10.50000    0.09862    0.16582 =
         0.08187   -0.05879    0.04416   -0.06367
AFIX  43
H33   4    0.353069    0.130698    0.790002    10.50000   -1.20000
AFIX   0

PART 2
S1    7    0.045977    0.713740    0.230991    10.20000    0.09861    0.11653 =
         0.10870   -0.07010    0.06291   -0.02359

CL2   2    0.255619    0.163144    0.781177    10.30000    0.11639    0.12304 =
         0.11209    0.01271    0.02465    0.00138
CL3   2    0.414312    0.221589    0.746373    10.30000    0.11639    0.12304 =
         0.11209    0.01271    0.02465    0.00138
AFIX  66
C35   1    0.245077    0.267394    0.736482    10.30000    0.06974    0.08733 =
         0.05307   -0.03484    0.00517    0.01118
C36   1    0.168428    0.326208    0.723318    10.30000    0.06974    0.08733 =
         0.05307   -0.03484    0.00517    0.01118
AFIX  43
H36   4    0.118884    0.307663    0.738620    10.30000   -1.20000
AFIX  65
C37   1    0.165829    0.412738    0.687285    10.30000    0.06974    0.08733 =
         0.05307   -0.03484    0.00517    0.01118
AFIX  43
H37   4    0.114545    0.452088    0.678478    10.30000   -1.20000
AFIX  65
C38   1    0.239878    0.440455    0.664415    10.30000    0.06974    0.08733 =
         0.05307   -0.03484    0.00517    0.01118
AFIX  43
H38   4    0.238139    0.498350    0.640307    10.30000   -1.20000
AFIX  65
C39   1    0.316528    0.381643    0.677578    10.30000    0.06974    0.08733 =
         0.05307   -0.03484    0.00517    0.01118
AFIX  43
H39   4    0.366071    0.400188    0.662277    10.30000   -1.20000
AFIX  65
C34   1    0.319128    0.295112    0.713612    10.30000    0.06974    0.08733 =
         0.05307   -0.03484    0.00517    0.01118
AFIX   0
HKLF 4


REM
REM wR2 = 0.3251, GooF = S = 0.999, Restrained GooF = 0.996 for all data
REM R1 = 0.1542 for 6169 Fo > 4sig(Fo) and 0.1608 for all 6692 data
REM 315 parameters refined using 60 restraints

END

WGHT      0.2000      0.0000

REM Highest difference peak  1.939,  deepest hole -1.128,  1-sigma level  0.155
Q1    1  -0.0999  0.1019  0.6035  11.00000  0.05    0.96
Q2    1   0.3951  0.1830  0.7742  11.00000  0.05    0.83
;
_shelx_res_checksum                51835
_shelx_hkl_file
;
  -4   4  -1   99.59    0.46   1
  -3   4  -1 2563.43    2.16   1
  -2  -6   0   49.88    0.36   1
   0   4  -2   74.07    0.37   1
   0   5  -3   44.11    0.35   1
   2  -6  -2   54.79    0.41   1
   2  -2  -1   12.69    0.13   1
   4  -4  -3    0.50    0.11   1
  -5   4  -1  547.75    1.12   1
  -1  -5   0   25.77    0.22   1
   1  -5  -1  192.47    0.57   1
  -4   3   0  755.26    1.06   1
  -3  -6   0  583.26    1.13   1
  -2   5  -2   60.50    0.39   1
   3  -3  -2   96.96    0.33   1
   4   4  -5  283.29    0.62   1
   5  -3  -4   11.40    0.14   1
  -6   4  -1  466.55    1.22   1
   2   4  -3  199.97    0.57   1
   4  -3  -3 1303.32    1.30   1
   5  -2  -4   16.88    0.16   1
  -6   3   0  478.04    1.08   1
  -3  -7  -1    0.33    0.20   1
  -3  -3   1    3.32    0.10   1
  -1   5  -2  657.54    1.28   1
   2  -5  -2   16.72    0.22   1
   3  -2  -2 2392.49    1.48   1
   3  -1  -2  664.73    0.61   1
   3   6  -6    2.77    0.19   1
  -2  -5   0   10.86    0.16   1
  -1   2   0  208.81    0.40   1
   1   5  -3  491.68    1.06   1
   3  -5  -3   19.61    0.23   1
   4  -5  -4  570.90    1.11   1
   6  -4  -6  112.75    0.53   1
  -2   3   0   13.62    0.12   1
  -1  -6  -1  163.36    0.61   1
  -1  -4   0  262.14    0.57   1
  -1   4  -1   35.48    0.26   1
   0  -2   0    7.08    0.08   1
  -6  -4   2    7.94    0.22   2
  -6   2   6    4.45    0.08   2
  -4   4   5  294.77    0.67   2
  -3  -3   1    3.47    0.14   2
  -2  -4  -2 1009.28    1.41   2
  -1   6   2  303.85    0.84   2
   0  -3  -4    0.69    0.11   2
   0   5   1   36.56    0.29   2
   3   4  -5  145.66    0.45   2
  -4  -3   2  147.38    0.42   2
  -3   2   4    0.23    0.06   2
   0   3   1  217.04    0.44   2
   0   4   1    9.55    0.14   2
  -6  -1   5  284.86    0.38   2
  -3   5   4   65.30    0.33   2
  -1   5   2  327.39    0.70   2
   1  -2  -4  455.13    0.59   2
   3   2  -6    2.91    0.06   2
  -4  -4   1   33.50    0.26   2
  -5  -3   3  909.50    1.05   2
  -3   3   4  175.19    0.41   2
  -1  -4  -3  150.96    0.51   2
  -1  -2   0  199.60    0.36   2
  -1   4   2   49.59    0.26   2
   0  -3  -3  137.99    0.40   2
  -2  -4  -1   37.10    0.25   2
  -2   3   3 1040.63    0.97   2
  -1  -3  -1 1147.36    1.06   2
   0   6   0  295.22    0.77   2
   2   6  -4  177.26    0.61   2
   1  -3  -6    5.34    0.11   2
   1   4  -1   71.78    0.28   2
   2   4  -3  241.28    0.53   2
  -2  -5   6  101.57    0.66   3
  -1  -9   7    7.24    0.50   3
   0  -1   3    9.40    0.19   3
   3  -4   6  132.73    0.99   3
   5  -2   4  210.46    1.06   3
   7 -10   5    8.21    0.51   3
   9  -5   3    5.07    0.48   3
  10  -5   2    4.84    0.40   3
  11  -6   1  156.56    1.15   3
  -3  -5   5  260.12    0.84   3
   3 -12   6   -0.41    0.39   3
   4  -3   5   13.94    0.43   3
   7  -9   5   -0.29    0.48   3
   7  -4   4   -0.23    0.38   3
   8 -10   4   13.68    0.54   3
   8  -6   4    3.31    0.44   3
  -3  -4   4   34.69    0.26   3
  -2  -4   5   19.71    0.29   3
  -2  -3   4   27.65    0.26   3
   1 -12   6    4.21    0.51   3
   1  -8   7   80.01    0.93   3
   1  -4   6  266.01    1.18   3
   2 -12   6    3.69    0.42   3
   2  -4   6  677.24    1.95   3
   4 -11   6   -0.34    0.40   3
   4  -2   4  339.16    1.24   3
   4  -1   3   13.67    0.29   3
   5  -4   5   21.67    0.52   3
   6 -11   5    2.10    0.42   3
   6  -2   3   59.36    0.61   3
   6  -1   2   65.30    0.54   3
   8  -9   4    4.13    0.53   3
  11  -8   1    4.45    0.39   3
  11  -7   1   24.27    0.56   3
  -2  -6   6  327.46    1.18   3
  -1  -5   6  315.18    1.17   3
   0  -3   5  796.83    1.62   3
   0  -2   4  250.72    0.81   3
   1  -1   3    2.44    0.18   3
   3 -13   5    1.10    0.37   3
   3 -11   6   24.27    0.65   3
   4 -10   6   11.16    0.53   3
   5 -12   5    5.96    0.41   3
   7  -3   3    3.02    0.34   3
   8  -8   4   44.68    0.76   3
   9  -9   3    0.75    0.36   3
   9  -7   3    3.86    0.41   3
  10  -8   2   17.06    0.51   3
   2 -13   5    2.69    0.43   3
   2  -5   6    1.07    0.40   3
   2  -1   3 2150.55    2.36   3
   3  -2   4  176.97    0.84   3
   3  -1   3  122.08    0.63   3
   4  -9   6    4.89    0.51   3
   4  -7   6   17.21    0.57   3
   6  -9   5   54.55    0.87   3
   7 -11   4   40.36    0.69   3
   7  -5   4   35.49    0.64   3
   7  -2   2    7.96    0.34   3
   7  -1   1   57.87    0.50   3
   8  -3   2    0.51    0.37   3
   8  -1   0   49.08    0.47   3
   0 -11   6    1.54    0.39   3
   1  -2   4  257.25    0.86   3
   2 -11   6   -0.40    0.44   3
   2  -2   4 1397.34    2.15   3
   3 -10   6    0.53    0.45   3
   4  -4   5   26.37    0.50   3
   6 -12   4    9.29    0.44   3
   6  -4   4   73.39    0.74   3
   8 -11   3   24.72    0.56   3
   8  -2   1    1.18    0.31   3
   9  -2   0    8.55    0.29   3
  10  -5   1   69.09    0.75   3
  -1 -10   6    0.31    0.33   3
  -1  -6   6   46.48    0.52   3
  -1  -4   5  390.93    1.11   3
   3  -8   6    0.68    0.51   3
   7  -9   4  106.35    1.06   3
  11  -6   0    9.46    0.39   3
  -2  -5   5  571.55    1.31   3
  -1  -7   6    4.86    0.31   3
   1  -6   6    0.51    0.32   3
   2  -9   6    7.63    0.54   3
   3 -12   5   10.08    0.48   3
   3  -4   5  335.08    1.30   3
   4 -13   4    7.63    0.41   3
   4 -11   5   31.33    0.70   3
   4  -5   5   51.65    0.68   3
   5  -9   5    3.98    0.56   3
   6 -11   4   10.74    0.53   3
   7 -12   3    2.51    0.35   3
   8  -6   3    1.38    0.40   3
  10 -10   1    6.29    0.36   3
  10  -6   1   89.78    0.85   3
  11  -9   0   61.27    0.72   3
  11  -8   0   11.53    0.45   3
  11  -7   0  155.18    1.08   3
  -1  -3   4    7.35    0.19   3
   0  -4   5  375.55    1.15   3
   1  -7   6    6.92    0.44   3
   2 -12   5   14.87    0.52   3
   2  -8   6  118.72    1.00   3
   2  -4   5   69.26    0.60   3
   4  -3   4   24.24    0.40   3
   5 -12   4   13.56    0.50   3
   5  -7   5    1.63    0.43   3
   8  -7   3   76.81    0.86   3
   9  -9   2   19.42    0.57   3
  10  -9   1   12.64    0.47   3
  10  -8   1   33.12    0.65   3
  10  -4   0  113.11    0.84   3
   1  -4   5  707.52    1.67   3
   3 -13   4   26.78    0.57   3
   3 -11   5   -0.32    0.39   3
   4  -1   2  142.58    0.64   3
   6  -6   4   23.26    0.56   3
   6  -1   1   72.49    0.49   3
   7 -11   3   28.07    0.60   3
   9  -8   2   41.78    0.69   3
  -2  -6   5   19.05    0.33   3
   2 -13   4    0.39    0.35   3
   3  -5   5   66.86    0.66   3
   3  -3   4  928.56    1.88   3
   4 -12   4   26.56    0.62   3
   4  -7   5  119.50    0.97   3
   5 -13   3    4.84    0.35   3
   5 -11   4   57.34    0.83   3
   6 -12   3   38.18    0.69   3
   6  -9   4    2.43    0.45   3
   6  -8   4   28.48    0.66   3
   6  -7   4    9.45    0.48   3
   8 -11   2    6.36    0.42   3
   8  -3   1  107.63    0.76   3
   9 -11   1    0.30    0.35   3
   9  -3   0  297.04    1.20   3
  -2  -4   4  212.94    0.68   3
   0  -3   4    0.57    0.14   3
   1 -11   5    5.37    0.42   3
   2  -5   5  276.93    1.15   3
   4  -8   5    5.55    0.46   3
   5  -5   4   43.45    0.58   3
   6  -4   3    4.43    0.32   3
   7 -10   3   64.24    0.82   3
   7  -2   1  506.91    1.37   3
   8  -5   2  208.94    1.17   3
  10  -5   0   90.41    0.79   3
  11  -6  -1   14.06    0.41   3
  -2  -8   5   23.34    0.42   3
  -2  -7   5  237.41    0.93   3
  -1 -10   5   21.53    0.49   3
   0  -5   5    6.80    0.25   3
   1  -5   5   66.21    0.58   3
   2 -10   5   46.10    0.74   3
   3 -12   4    4.15    0.42   3
   3  -9   5    7.27    0.46   3
   3  -2   3  206.18    0.78   3
   3  -1   2   77.51    0.42   3
   4 -13   3   59.11    0.79   3
   7 -12   2   29.36    0.59   3
   7  -9   3    0.11    0.41   3
   7  -7   3    1.13    0.41   3
   8 -10   2   83.71    0.90   3
   9 -10   1   19.13    0.55   3
  10 -10   0   23.77    0.51   3
  10  -6   0  169.56    1.10   3
  11  -9  -1   15.52    0.44   3
  11  -8  -1   68.47    0.77   3
  11  -7  -1  146.23    1.03   3
  -1  -6   5   49.14    0.47   3
   0 -10   5   41.29    0.60   3
   0  -2   3 2356.24    2.03   3
   1 -10   5   12.08    0.49   3
   2 -12   4    4.49    0.48   3
   4 -11   4    0.26    0.37   3
   5 -12   3    3.73    0.46   3
   5  -9   4   57.70    0.77   3
   5  -2   2    4.52    0.24   3
   8 -12   1    4.66    0.35   3
   8  -9   2    5.31    0.45   3
   8  -7   2    2.91    0.45   3
   8  -6   2  119.59    0.95   3
   9  -9   1    3.57    0.45   3
  10  -7   0    1.27    0.44   3
  -1  -8   5  209.61    1.01   3
  -1  -7   5    0.91    0.28   3
   0  -6   5   12.06    0.33   3
   1 -12   4   18.21    0.50   3
   1  -6   5    6.79    0.32   3
   2  -9   5  147.63    1.06   3
   2  -7   5  108.44    0.83   3
   2  -2   3   71.96    0.44   3
   2  -1   2   56.86    0.34   3
   3 -13   3    2.86    0.36   3
   5  -8   4    4.10    0.43   3
   5  -7   4   26.85    0.53   3
   6  -5   3  200.25    1.08   3
   6  -3   2    2.06    0.25   3
   8  -8   2   18.38    0.53   3
   8  -4   1  167.46    0.97   3
   9  -8   1   45.56    0.67   3
   9  -7   1   33.93    0.59   3
  10  -8   0  336.19    1.57   3
   0  -7   5  474.53    1.52   3
   1  -9   5    1.81    0.39   3
   1  -8   5  355.20    1.44   3
   1  -7   5   47.69    0.56   3
   3 -14   2   15.18    0.43   3
   3 -11   4   41.77    0.67   3
   4 -10   4   87.21    0.91   3
   4  -3   3    6.50    0.26   3
   5 -13   2   18.69    0.49   3
   5  -4   3   96.44    0.69   3
   6 -12   2   34.66    0.66   3
   8 -11   1    7.51    0.44   3
   9 -11   0    4.86    0.39   3
  -2  -5   4   30.90    0.30   3
   2  -4   4 1505.19    2.28   3
   4 -12   3   11.41    0.47   3
   4  -9   4   11.35    0.49   3
   4  -6   4  215.95    1.11   3
   6  -9   3   55.41    0.75   3
   6  -8   3   19.81    0.57   3
   6  -7   3  107.55    0.90   3
   7 -10   2    2.56    0.44   3
  10  -5  -1  123.42    0.88   3
  11  -9  -2   48.37    0.65   3
  11  -6  -2   27.11    0.53   3
   0 -11   4   25.34    0.51   3
   0  -4   4  207.47    0.76   3
   1  -4   4   89.20    0.55   3
   3 -10   4    0.50    0.39   3
   3  -5   4  567.98    1.57   3
   4  -8   4  140.46    1.02   3
   4  -2   2   16.45    0.28   3
   6 -13   1   16.53    0.47   3
   7  -9   2   45.50    0.74   3
   7  -6   2    5.27    0.43   3
   8 -10   1    7.37    0.45   3
   8  -3   0  184.39    0.88   3
   9  -5   0  109.55    0.83   3
   9  -3  -1  187.73    0.89   3
  10 -10  -1    9.74    0.39   3
  11  -8  -2  129.14    0.97   3
  11  -7  -2   69.12    0.74   3
   2 -10   4    5.25    0.46   3
   3 -12   3   88.91    0.90   3
   3  -9   4  136.84    1.03   3
   3  -6   4  152.63    0.91   3
   3  -3   3  176.98    0.74   3
   4 -14   1   -0.23    0.27   3
   4 -11   3    5.88    0.51   3
   5 -12   2   84.32    0.92   3
   5 -10   3   13.16    0.51   3
   5  -5   3  926.15    2.09   3
   7  -8   2   51.23    0.71   3
   7  -7   2  131.78    0.97   3
   8  -9   1    3.56    0.46   3
   8  -6   1    2.01    0.40   3
  10  -9  -1   27.26    0.55   3
  10  -6  -1    0.47    0.31   3
  -2  -6   4  188.99    0.73   3
  -1  -3   3   29.66    0.24   3
   1 -10   4    0.78    0.43   3
   2 -12   3    1.83    0.41   3
   2  -5   4  238.66    0.97   3
   4  -4   3   60.05    0.52   3
   5  -9   3    1.18    0.39   3
   5  -6   3  138.75    0.89   3
   5  -3   2   44.17    0.43   3
   7 -11   1    0.46    0.41   3
   8  -8   1  151.30    1.08   3
   8  -7   1  285.98    1.38   3
   9  -9   0   75.37    0.81   3
   9  -8   0  119.47    0.99   3
   9  -6   0   41.46    0.59   3
  10 -11  -2    0.32    0.26   3
  10  -8  -1   56.26    0.70   3
  10  -7  -1   31.95    0.56   3
  11 -10  -3   35.91    0.57   3
  -2  -8   4    6.38    0.29   3
  -2  -7   4  206.65    0.81   3
   0 -12   3    0.38    0.33   3
   0 -10   4    5.81    0.36   3
   1 -12   3   52.56    0.69   3
   2  -9   4   15.79    0.47   3
   2  -6   4   10.21    0.37   3
   3 -14   1   59.43    0.72   3
   5 -13   1    1.56    0.34   3
   5  -8   3  123.23    0.95   3
   6 -12   1    9.15    0.50   3
   6 -10   2    6.05    0.44   3
   8 -11   0   55.08    0.73   3
  -1  -9   4   21.94    0.41   3
   0  -9   4   14.54    0.45   3
   1 -13   2   15.13    0.49   3
   2 -14   1   16.44    0.45   3
   2 -13   2    2.89    0.37   3
   2  -8   4   48.82    0.59   3
   2  -7   4    6.55    0.33   3
   3  -2   2  170.06    0.62   3
   4 -12   2   31.88    0.61   3
   4 -10   3    2.81    0.41   3
   4  -5   3  143.97    0.80   3
   5 -11   2  102.59    0.95   3
   6  -9   2    8.26    0.47   3
   6  -5   2    3.16    0.30   3
   7 -10   1    5.87    0.47   3
   8  -4   0    5.52    0.30   3
   9  -4  -1  260.78    1.09   3
  10 -10  -2    9.73    0.39   3
  11  -9  -3    2.23    0.30   3
  11  -6  -3   77.89    0.72   3
  -1  -8   4   66.68    0.58   3
  -1  -7   4   82.73    0.58   3
  -1  -6   4  106.93    0.59   3
   0  -6   4 1745.92    2.46   3
   1  -8   4    0.33    0.27   3
   1  -7   4    7.97    0.35   3
   1  -6   4  379.93    1.22   3
   2 -11   3    3.79    0.41   3
   3  -4   3  927.77    1.74   3
   4  -9   3   31.25    0.58   3
   6 -13   0   16.57    0.48   3
   6  -8   2   27.02    0.54   3
   7 -12   0   68.67    0.80   3
   7  -5   1  388.55    1.39   3
   8 -12  -1   12.64    0.45   3
   9 -12  -2    0.23    0.27   3
   9 -10  -1   42.97    0.65   3
  10  -5  -2    2.40    0.33   3
  11  -7  -3   45.80    0.62   3
  -2  -4   3  152.86    0.50   3
   0 -11   3   18.71    0.51   3
   0  -8   4   80.64    0.65   3
   0  -7   4   59.58    0.54   3
   1 -11   3   13.00    0.45   3
   3 -12   2   38.97    0.66   3
   3 -10   3    6.02    0.41   3
   3  -1   1  279.49    0.67   3
   4 -14   0   27.84    0.54   3
   4  -6   3   96.40    0.71   3
   4  -3   2    4.62    0.20   3
   5 -10   2   11.96    0.53   3
   5  -4   2   42.97    0.45   3
   6 -11   1   17.07    0.54   3
   7  -9   1    1.30    0.39   3
  10 -11  -3   26.08    0.51   3
  10  -9  -2   45.71    0.64   3
  10  -6  -2   38.04    0.56   3
  11 -10  -4    0.02    0.29   3
   2 -12   2   71.29    0.83   3
   2  -4   3  390.08    1.07   3
   2  -2   2  367.44    0.83   3
   3 -14   0    0.24    0.31   3
   3 -13   1    0.58    0.39   3
   4 -11   2    0.24    0.37   3
   7 -11   0  115.26    1.02   3
   7  -8   1  146.91    1.03   3
   8  -9   0    0.12    0.37   3
   8  -3  -1  213.58    0.88   3
   9  -9  -1    4.40    0.40   3
   9  -3  -2    7.39    0.25   3
  10  -8  -2   62.12    0.71   3
  10  -7  -2    2.61    0.35   3
   1 -12   2    0.10    0.39   3
   2 -10   3   51.82    0.66   3
   3  -9   3   10.10    0.42   3
   5  -9   2   11.10    0.44   3
   5  -5   2   29.19    0.43   3
   6 -12   0  268.10    1.45   3
   6 -10   1   17.57    0.56   3
   8 -11  -1   82.07    0.85   3
   8  -8   0   50.12    0.67   3
   8  -7   0  255.10    1.26   3
   9  -8  -1  151.01    1.04   3
   9  -7  -1   22.78    0.50   3
   9  -6  -1  110.69    0.83   3
  -1  -4   3   13.68    0.20   3
   1 -13   1    8.24    0.45   3
   1 -10   3    4.18    0.38   3
   1  -2   2  792.13    1.10   3
   2 -13   1   22.26    0.52   3
   3  -6   3  675.51    1.68   3
   5  -8   2   33.88    0.53   3
   5  -6   2    3.15    0.28   3
   6 -13  -1   76.96    0.81   3
   7 -12  -1   66.28    0.78   3
   8 -12  -2   16.26    0.47   3
   9 -12  -3   13.42    0.41   3
  10 -10  -3    1.70    0.31   3
  10  -4  -3   56.46    0.52   3
  -2  -9   3  439.76    1.28   3
   0  -4   3   72.32    0.42   3
   2  -5   3 1275.40    2.02   3
   3  -3   2   30.79    0.30   3
   4 -14  -1    1.52    0.32   3
   4  -2   1   23.05    0.25   3
   5  -3   1  220.77    0.81   3
   6  -9   1   37.33    0.61   3
   7 -13  -2   44.46    0.64   3
   7 -10   0   10.35    0.49   3
   9  -4  -2    5.39    0.31   3
  10 -11  -4    3.84    0.33   3
  11 -10  -5   68.43    0.72   3
  11  -7  -4  108.66    0.83   3
  11  -6  -4   30.27    0.47   3
  -2  -5   3   33.43    0.26   3
  -1  -9   3  160.27    0.87   3
   1  -9   3    1.75    0.33   3
   2 -11   2   28.16    0.56   3
   2  -8   3    9.75    0.35   3
   2  -7   3  105.61    0.73   3
   4  -9   2   17.78    0.49   3
   6 -11   0   33.77    0.62   3
   6  -8   1   65.65    0.70   3
   6  -5   1  197.34    0.94   3
   7  -9   0   12.81    0.52   3
   8  -4  -1    3.29    0.24   3
  10  -5  -3   55.83    0.57   3
  -2  -8   3    0.31    0.19   3
   0 -11   2   23.39    0.51   3
   1 -11   2   79.61    0.78   3
   1  -8   3   95.32    0.71   3
   3 -14  -1    3.02    0.32   3
   3 -10   2    0.25    0.35   3
   4  -5   2    0.63    0.23   3
   5 -13  -1    0.79    0.34   3
   5 -10   1   21.80    0.53   3
   7 -11  -1   42.84    0.67   3
   7  -5   0  367.04    1.27   3
   8 -11  -2   13.88    0.48   3
   8  -9  -1  309.41    1.47   3
   9 -12  -4   14.66    0.43   3
   9 -11  -3    0.61    0.34   3
   9  -9  -2   54.12    0.70   3
  10  -8  -3    1.23    0.35   3
  10  -7  -3   27.40    0.53   3
  10  -6  -3    0.83    0.28   3
  11  -9  -5    3.30    0.34   3
  -2  -7   3   84.65    0.51   3
  -2  -6   3   32.54    0.30   3
  -1  -8   3  264.79    1.01   3
  -1  -5   3  500.12    1.07   3
   0  -8   3    7.11    0.32   3
   1  -7   3   60.85    0.55   3
   2 -12   1    0.41    0.40   3
   2  -3   2  929.95    1.40   3
   4  -6   2  389.05    1.28   3
   6 -13  -2    0.13    0.33   3
   7 -13  -3   26.97    0.56   3
   7 -12  -2   21.05    0.54   3
   7  -8   0  130.49    0.95   3
   7  -7   0   52.06    0.62   3
   7  -6   0  110.60    0.77   3
   8  -8  -1   34.00    0.57   3
   8  -5  -1  571.83    1.59   3
   9  -8  -2   71.80    0.74   3
   9  -7  -2  134.20    0.96   3
   9  -6  -2    0.60    0.38   3
  10 -10  -4   49.89    0.64   3
  -1  -6   3   81.10    0.49   3
   0  -7   3  554.91    1.42   3
   0  -6   3   34.40    0.38   3
   1 -12   1   62.92    0.73   3
   2 -10   2   19.66    0.47   3
   4 -14  -2    6.80    0.37   3
   5  -4   1  569.82    1.37   3
   6 -10   0  154.96    1.09   3
   8  -7  -1  117.09    0.87   3
   9 -10  -3   18.15    0.53   3
  10 -11  -5   55.62    0.66   3
  11 -10  -6    1.42    0.26   3
  11  -8  -5   38.43    0.56   3
   3  -8   2   58.38    0.63   3
   3  -2   1 1948.30    1.87   3
   4 -13  -1   25.75    0.55   3
   4 -10   1    3.38    0.40   3
   4  -3   1  140.05    0.61   3
   5  -2   0  375.82    0.91   3
   7 -10  -1   44.57    0.68   3
   7  -3  -1    3.65    0.20   3
   8  -3  -2    0.40    0.18   3
  10  -4  -4   69.66    0.57   3
  11  -7  -5    5.96    0.34   3
  11  -6  -5   33.56    0.48   3
  -1 -10   2   51.15    0.55   3
   1  -3   2 3344.44    2.45   3
   3 -14  -2   16.66    0.45   3
   3  -7   2    5.94    0.34   3
   3  -5   2  345.38    1.06   3
   5 -13  -2    6.74    0.46   3
   5  -7   1    2.35    0.31   3
   6 -11  -1    8.42    0.48   3
   6  -9   0   42.80    0.62   3
   9 -12  -5   47.17    0.62   3
   2 -14  -2    3.33    0.33   3
   2 -11   1  125.52    0.96   3
   2  -4   2 1052.55    1.59   3
   3  -6   2  575.52    1.47   3
   4  -9   1  269.90    1.28   3
   5 -10   0   99.82    0.92   3
   6 -12  -2    3.69    0.39   3
   6  -8   0   11.30    0.41   3
   7 -13  -4    1.93    0.32   3
   7 -11  -2   17.10    0.50   3
   7  -9  -1   20.00    0.52   3
   8  -9  -2    3.86    0.40   3
   9  -4  -3   18.32    0.37   3
  10 -11  -6    6.22    0.35   3
  10 -10  -5   10.28    0.40   3
  10  -6  -4   28.76    0.49   3
  -2  -9   2    0.19    0.25   3
  -1 -11   1    3.24    0.35   3
   0  -3   2  230.54    0.60   3
   1  -9   2  161.66    0.91   3
   2  -8   2    5.02    0.30   3
   3 -10   1   78.83    0.76   3
   4 -14  -3    1.10    0.31   3
   6  -6   0  200.28    0.99   3
   6  -5   0  713.76    1.66   3
   7  -8  -1  101.14    0.84   3
   8  -8  -2   29.76    0.58   3
   9  -8  -3    7.42    0.38   3
   0 -11   1   34.80    0.55   3
   0  -9   2    9.61    0.34   3
   1 -13  -1    2.04    0.38   3
   1 -12   0    0.19    0.40   3
   2  -7   2  137.29    0.76   3
   3 -14  -3   25.60    0.55   3
   4 -13  -2    1.62    0.35   3
   4  -4   1  101.58    0.56   3
   5 -14  -4   -0.05    0.21   3
   5  -3   0  304.34    0.89   3
   6 -10  -1   41.11    0.64   3
   8 -10  -3   20.41    0.56   3
   8  -5  -2   76.58    0.63   3
   9 -12  -6   12.15    0.39   3
   9  -7  -3   19.36    0.47   3
   9  -6  -3  105.78    0.80   3
   9  -5  -3   68.52    0.60   3
   0 -12   0   40.85    0.59   3
   1  -8   2  140.19    0.79   3
   1  -4   2  250.03    0.73   3
   2 -10   1    0.01    0.33   3
   2  -2   1  157.58    0.49   3
   4  -7   1    3.53    0.27   3
   5 -13  -3    4.48    0.39   3
   5 -12  -2    0.51    0.45   3
   5  -9   0   16.18    0.46   3
   7 -13  -5    7.79    0.39   3
   7  -6  -1   68.66    0.62   3
   8  -7  -2    4.19    0.35   3
  10 -11  -7   20.34    0.47   3
  -2  -8   2   31.01    0.37   3
   0  -8   2   56.76    0.53   3
   3  -3   1  111.49    0.50   3
   4 -14  -4   37.40    0.60   3
   4 -10   0   10.52    0.45   3
   4  -6   1   62.08    0.54   3
   6 -13  -4   -0.19    0.33   3
   6 -12  -3   22.15    0.59   3
   6  -9  -1  180.66    1.10   3
   7 -11  -3    3.19    0.39   3
   9  -3  -4  106.88    0.61   3
  10  -8  -5   64.26    0.70   3
   1  -7   2   11.66    0.29   3
   1  -6   2   34.00    0.36   3
   2 -11   0   14.25    0.53   3
   3  -8   1  149.60    0.89   3
   5  -4   0 1140.75    1.83   3
   8  -9  -3   77.51    0.79   3
  10  -7  -5   10.23    0.39   3
  11  -8  -7    4.59    0.35   3
  -1  -4   2   46.15    0.28   3
   0  -7   2   55.07    0.47   3
   2 -12  -1   16.16    0.50   3
   3 -14  -4   13.23    0.42   3
   4 -11  -1    3.58    0.41   3
   5 -10  -1   82.74    0.81   3
   7 -13  -6    3.57    0.35   3
   7  -3  -2   63.44    0.46   3
   8  -3  -3  189.53    0.76   3
   9  -8  -4    2.65    0.35   3
  10  -9  -6    1.08    0.32   3
  10  -6  -5    3.59    0.30   3
  11  -9  -8    4.07    0.29   3
  11  -7  -7   19.82    0.47   3
  -1 -11   0  104.33    0.79   3
   0  -6   2   21.30    0.28   3
   0  -5   2  249.50    0.75   3
   1 -11   0  113.85    0.89   3
   2 -14  -4    5.61    0.33   3
   3 -10   0   11.46    0.43   3
   3  -7   1    0.37    0.24   3
   5 -13  -4    3.74    0.38   3
   5 -11  -2  458.95    1.83   3
   5  -6   0    1.97    0.23   3
   6 -10  -2  218.88    1.25   3
   7  -8  -2    0.50    0.35   3
   8 -10  -4    4.88    0.43   3
   9  -7  -4   16.69    0.45   3
  10 -10  -7    1.78    0.31   3
  -1  -6   2  294.25    0.86   3
   2  -8   1   83.34    0.65   3
   3 -11  -1    7.02    0.48   3
   6 -12  -4    3.09    0.38   3
   6  -7  -1   49.70    0.56   3
   6  -6  -1    2.58    0.32   3
   6  -5  -1   86.94    0.61   3
   7 -11  -4    6.67    0.44   3
   7  -4  -2    2.09    0.23   3
   8  -7  -3   52.40    0.61   3
   9  -5  -4   36.34    0.46   3
  -2  -9   1  278.69    1.02   3
   0  -9   1  378.62    1.31   3
   3 -12  -2  119.23    0.99   3
   4 -13  -4   -0.34    0.36   3
   4 -10  -1   42.68    0.62   3
   4  -8   0   48.83    0.55   3
   4  -3   0  707.25    1.24   3
   7  -6  -2   12.84    0.35   3
   8 -12  -7    2.81    0.36   3
   8  -9  -4    6.46    0.46   3
   8  -5  -3  188.66    0.90   3
   9 -11  -7    2.25    0.31   3
   9 -10  -6    2.46    0.35   3
   5 -13  -5    3.04    0.37   3
   6 -13  -6    2.98    0.33   3
   6  -9  -2    9.12    0.41   3
   1  -8   1   26.39    0.39   3
   2 -12  -2  149.20    1.08   3
   2 -11  -1  107.15    0.91   3
   4 -11  -2   27.01    0.58   3
   5 -12  -4    0.51    0.45   3
   5 -10  -2   10.35    0.44   3
   7 -10  -4   18.51    0.59   3
   8 -11  -6    1.56    0.37   3
   9 -11  -8   11.78    0.43   3
  10  -6  -6  122.39    0.82   3
  11  -8  -9   44.77    0.61   3
   0  -8   1    4.84    0.28   3
   1 -12  -2    4.95    0.38   3
   1 -11  -1    4.02    0.44   3
   2  -9   0   12.36    0.41   3
   2  -5   1   45.47    0.37   3
   3 -10  -1   21.54    0.49   3
   3  -2   0  955.61    1.21   3
   5 -11  -3  203.97    1.25   3
   6 -13  -7   21.03    0.51   3
   6 -10  -3    0.82    0.38   3
   7 -11  -5   16.48    0.50   3
   7  -8  -3   43.59    0.60   3
   7  -2  -3  318.20    0.84   3
   8 -12  -8    9.87    0.38   3
   8  -8  -4    6.63    0.38   3
   9  -7  -5  163.66    1.00   3
  10 -10  -9    0.55    0.28   3
  10  -8  -7   56.46    0.67   3
  -2  -8   1    0.43    0.22   3
  -1 -11  -1    3.57    0.34   3
  -1 -10   0   69.22    0.63   3
   0 -12  -2    3.62    0.34   3
   0 -11  -1   30.92    0.56   3
   1  -7   1   33.06    0.38   3
   2 -13  -4    2.68    0.36   3
   5  -7  -1   29.82    0.45   3
   5  -3  -1  104.04    0.50   3
   9  -4  -5  107.48    0.68   3
  11  -7  -9    5.49    0.36   3
   1  -3   1 1087.30    1.27   3
   3  -7   0    4.89    0.32   3
   4 -10  -2  178.62    1.13   3
   5  -9  -2  154.18    0.98   3
   5  -6  -1  253.60    1.00   3
   5  -4  -1   51.69    0.41   3
   6  -7  -2    9.27    0.33   3
   8 -10  -6    3.83    0.44   3
   8  -9  -5   11.11    0.45   3
   8  -7  -4  102.30    0.80   3
   8  -3  -4   49.78    0.43   3
   9 -11  -9    0.57    0.26   3
   9  -5  -5    6.23    0.29   3
  10  -7  -7   26.96    0.49   3
  11  -8 -10    2.89    0.30   3
   0  -7   1  625.90    1.42   3
   1  -9   0  102.99    0.73   3
   2 -12  -3   50.60    0.71   3
   2  -8   0   43.65    0.52   3
   3 -13  -5    0.89    0.36   3
   4 -11  -3   13.80    0.49   3
   4  -8  -1   18.41    0.41   3
   5 -13  -7    0.54    0.34   3
   5  -5  -1    0.58    0.21   3
   6  -6  -2    5.87    0.29   3
   7 -11  -6    2.61    0.39   3
   7  -9  -4  173.10    1.10   3
   9  -8  -6    1.93    0.35   3
   1  -4   1   35.73    0.28   3
   2 -11  -2    2.25    0.41   3
   3  -6   0  648.30    1.46   3
   5 -10  -3  186.19    1.15   3
   6 -10  -4  372.32    1.63   3
   6  -5  -2  386.40    1.18   3
   6  -4  -2    7.44    0.23   3
   7 -12  -8   12.79    0.44   3
   7 -10  -5   16.52    0.51   3
   7  -6  -3   36.91    0.47   3
   7  -5  -3  269.74    1.04   3
   8  -8  -5   70.72    0.76   3
  10  -5  -7  243.27    1.08   3
  -2  -9   0   12.21    0.34   3
  -2  -7   1   28.33    0.32   3
  -1  -9   0  106.84    0.73   3
   0 -12  -3   -0.26    0.35   3
   1 -11  -2   46.41    0.70   3
   3 -12  -4    7.11    0.42   3
   3  -5   0    5.95    0.21   3
   7  -8  -4   20.53    0.53   3
   9  -7  -6  230.09    1.17   3
   0  -6   1   39.86    0.34   3
   1  -8   0  281.12    1.08   3
   2  -7   0  181.34    0.83   3
   3 -11  -3   29.86    0.58   3
   3 -10  -2   18.13    0.48   3
   4 -13  -7   67.64    0.78   3
   4 -12  -5    0.60    0.36   3
   4  -2  -1  358.77    0.77   3
   7 -12  -9   29.68    0.54   3
   8 -10  -7   22.33    0.55   3
   8  -9  -6    0.00    0.36   3
   9  -6  -6    9.40    0.43   3
  -1 -11  -2   78.34    0.72   3
  -1 -10  -1   20.31    0.46   3
   0  -5   1   36.39    0.31   3
   2 -13  -6   -0.12    0.30   3
   2 -12  -4   58.83    0.75   3
   2  -9  -1  280.56    1.20   3
   3  -8  -1   74.03    0.62   3
   4 -13  -8    6.63    0.38   3
   4 -11  -4  148.50    1.10   3
   4 -10  -3   39.31    0.63   3
   4  -6  -1   21.07    0.35   3
   5  -9  -3    1.36    0.32   3
   5  -7  -2  223.76    1.02   3
   6 -11  -6   13.21    0.50   3
   7 -10  -6    1.78    0.40   3
   7  -9  -5   51.96    0.69   3
   9  -3  -6   92.00    0.58   3
  10  -9 -11   10.65    0.40   3
  -3  -6   1  296.37    0.73   3
  -1  -6   1   64.54    0.40   3
   0  -4   1    9.52    0.15   3
   1 -13  -6    5.76    0.36   3
   1 -12  -4    0.65    0.41   3
   2 -11  -3   14.89    0.50   3
   2 -10  -2  213.12    1.17   3
   3 -13  -7    1.20    0.33   3
   5 -11  -5   47.44    0.71   3
   5 -10  -4   46.48    0.67   3
   6 -12  -8    6.29    0.40   3
   6 -10  -5   31.57    0.60   3
   6  -7  -3  245.72    1.10   3
   8 -11 -10    4.91    0.33   3
   8  -2  -5  164.86    0.65   3
   9 -10 -10    0.17    0.27   3
   9  -4  -6  112.17    0.68   3
  10  -5  -8    9.34    0.36   3
   0  -8   0  299.21    1.08   3
   1 -13  -7    1.95    0.32   3
   1  -9  -1   48.98    0.57   3
   2  -6   0   51.85    0.43   3
   4  -8  -2  229.47    1.08   3
   4  -5  -1    7.78    0.23   3
   4  -4  -1   34.65    0.33   3
   4  -3  -1    5.91    0.16   3
   5  -6  -2  477.51    1.36   3
   5  -2  -2  394.96    0.86   3
   6 -12  -9    6.06    0.41   3
   8  -9  -7    9.06    0.44   3
   8  -8  -6    5.32    0.39   3
   9  -7  -7    0.80    0.34   3
  10  -7  -9   23.93    0.48   3
  -1  -8   0  285.61    1.03   3
  -1  -5   1  181.61    0.60   3
   1  -7   0   25.06    0.35   3
   2 -12  -5    2.45    0.45   3
   3 -11  -4  249.19    1.38   3
   3 -10  -3  309.27    1.45   3
   3  -7  -1   20.90    0.37   3
   6 -11  -7    3.77    0.42   3
   6  -6  -3   20.33    0.38   3
   7  -8  -5   42.44    0.61   3
   7  -6  -4    1.60    0.27   3
   7  -2  -4    2.03    0.17   3
   9  -8  -8    0.32    0.38   3
  -1  -4   1   77.56    0.34   3
   2  -3   0   20.67    0.21   3
   4 -12  -7    0.87    0.44   3
   4 -11  -5    3.28    0.43   3
   5 -12  -8    2.46    0.39   3
   5 -11  -6   59.99    0.78   3
   5  -3  -2   65.88    0.42   3
   6  -5  -3   13.65    0.33   3
   6  -2  -3 1081.08    1.47   3
   8  -7  -6   19.15    0.51   3
   9  -6  -7  198.70    1.05   3
  10  -8 -11    1.47    0.29   3
  10  -6  -9    0.28    0.31   3
  -2  -5   1   74.13    0.36   3
  -1 -11  -3   13.01    0.41   3
  -1  -9  -1  140.03    0.84   3
   0 -12  -5    0.69    0.37   3
   1 -12  -5    2.42    0.39   3
   4  -7  -2    3.29    0.28   3
   5 -12  -9    4.15    0.41   3
   5 -10  -5    3.84    0.42   3
   5  -4  -2   74.29    0.48   3
   6  -9  -5    9.52    0.44   3
   7 -11 -10   22.10    0.54   3
   7  -4  -4  147.18    0.73   3
   7  -3  -4   17.42    0.27   3
   8  -9  -8    1.70    0.38   3
   8  -8  -7   23.60    0.56   3
  10  -8 -12    2.25    0.31   3
  10  -7 -10    3.87    0.34   3
  10  -5  -9   35.06    0.52   3
  -2  -9  -1   66.14    0.57   3
   2 -12  -6   61.50    0.79   3
   2 -10  -3   -0.06    0.36   3
   3  -8  -2    1.64    0.29   3
   5  -7  -3  147.93    0.87   3
   7 -10  -8   23.21    0.56   3
   9  -9 -11    9.22    0.43   3
   9  -8  -9   72.31    0.78   3
   9  -7  -8    8.96    0.42   3
   9  -4  -7  143.57    0.81   3
   1 -12  -6    0.99    0.44   3
   1 -11  -4   78.20    0.87   3
   2  -7  -1   31.62    0.41   3
   3 -11  -5   10.47    0.48   3
   4 -11  -6   31.46    0.63   3
   5 -12 -10    4.53    0.34   3
   5 -11  -7   19.21    0.55   3
   7  -8  -6    6.63    0.47   3
   8 -10 -11    0.59    0.31   3
   9  -9 -12   31.81    0.58   3
  10  -6 -10   48.25    0.60   3
   1  -9  -2  252.46    1.18   3
   1  -5   0   30.13    0.29   3
   3 -10  -4  145.18    1.04   3
   4 -12  -9    2.62    0.36   3
   7 -10  -9    4.58    0.46   3
   7  -6  -5   71.83    0.66   3
   8 -10 -12    2.11    0.29   3
   8  -9  -9   14.63    0.47   3
   8  -5  -6   25.94    0.46   3
   9  -8 -10   48.09    0.67   3
   9  -6  -8    7.19    0.38   3
  10  -7 -12    1.15    0.37   3
  -1 -11  -4    7.92    0.39   3
   0  -6   0  331.90    0.94   3
   1 -12  -7    4.58    0.43   3
   2 -11  -5    6.12    0.43   3
   3  -2  -1    7.08    0.14   3
   4 -10  -5    3.04    0.43   3
   5 -11  -8   10.64    0.50   3
   5 -10  -6    5.53    0.44   3
   6 -11 -10   -0.03    0.35   3
   6  -6  -4   25.79    0.42   3
   8  -8  -8  146.95    1.05   3
  10  -6 -11    0.63    0.36   3
  10  -5 -10   43.90    0.55   3
   0 -12  -7    0.30    0.32   3
   1  -4   0  245.15    0.68   3
   2  -8  -2   32.27    0.47   3
   3  -7  -2   15.71    0.36   3
   4 -11  -7    4.85    0.44   3
   4  -5  -2   66.80    0.48   3
   6 -11 -11    3.44    0.34   3
   7 -10 -10   96.17    0.94   3
   7  -5  -5  233.09    1.01   3
   8  -4  -6  103.38    0.66   3
   8  -3  -6    0.95    0.24   3
   8  -2  -6  100.58    0.54   3
   9  -8 -11   32.57    0.58   3
   0  -9  -2    9.63    0.38   3
   1 -12  -8    0.55    0.36   3
   1 -11  -5    7.03    0.47   3
   2 -12  -9    9.18    0.45   3
   2 -10  -4   42.42    0.65   3
   2  -9  -3  430.47    1.57   3
   3 -12 -10    0.18    0.27   3
   5 -11  -9   18.44    0.55   3
   7  -8  -7   15.84    0.50   3
   9  -8 -12    2.25    0.38   3
   9  -7 -10  152.91    1.10   3
   9  -6  -9  109.34    0.88   3
   9  -4  -8   33.12    0.48   3
  -1 -11  -5    4.24    0.43   3
  -1  -9  -2  157.90    0.91   3
  -1  -6   0    0.64    0.16   3
   0 -11  -5    4.17    0.39   3
   1  -3   0  918.43    1.14   3
   3 -11  -7    1.93    0.48   3
   3 -10  -5    5.08    0.44   3
   3  -8  -3  362.55    1.35   3
   4 -11  -8    0.36    0.42   3
   4 -10  -6   79.65    0.87   3
   4  -7  -3    4.34    0.28   3
   5 -11 -10   11.90    0.48   3
   5 -10  -7   32.86    0.63   3
   5  -7  -4  175.52    0.95   3
   5  -5  -3   70.85    0.53   3
   6  -9  -7   75.83    0.83   3
   6  -7  -5   32.47    0.51   3
   6  -5  -4  124.12    0.71   3
   7 -10 -12    0.78    0.31   3
   8  -9 -12    0.80    0.33   3
   8  -8  -9    0.32    0.35   3
   9  -8 -13   30.58    0.54   3
   9  -3  -8  613.38    1.54   3
  -2  -9  -2   30.70    0.45   3
   1  -8  -2    6.82    0.34   3
   4  -9  -5  113.26    0.96   3
   4  -8  -4  254.23    1.20   3
   4  -3  -2  169.15    0.61   3
   5 -11 -11    1.11    0.35   3
   5  -9  -6  143.55    1.05   3
   6  -4  -4    5.57    0.27   3
   7  -3  -5   -0.18    0.17   3
   9  -7 -11   16.93    0.56   3
   0  -7  -1  629.79    1.49   3
   1 -11  -6   36.70    0.67   3
   2  -5  -1  100.61    0.53   3
   3  -6  -2  114.43    0.66   3
   4 -11  -9    7.55    0.48   3
   4  -2  -2   19.60    0.20   3
   5 -10  -8   80.62    0.90   3
   7  -8  -8    5.27    0.44   3
   8  -8 -10   46.24    0.69   3
   9  -6 -10   41.11    0.66   3
   9  -5  -9   13.98    0.40   3
   0 -11  -6    1.16    0.36   3
   1  -6  -1   72.79    0.49   3
   2 -10  -5    0.12    0.39   3
   3 -10  -6   17.71    0.60   3
   4 -11 -11    9.44    0.47   3
   4 -11 -10   18.28    0.54   3
   4 -10  -7    6.50    0.52   3
   4  -6  -3   20.71    0.36   3
   5  -3  -3  891.15    1.46   3
   5  -2  -3  345.96    0.85   3
   6  -9  -8    5.81    0.47   3
   6  -6  -5   76.08    0.65   3
   6  -2  -4 1097.22    1.55   3
   7  -7  -7   20.36    0.50   3
   8  -8 -11    0.21    0.41   3
   8  -7  -9  104.36    0.91   3
   8  -4  -7    1.12    0.29   3
   9  -7 -12    3.46    0.38   3
  -2 -10  -4    4.59    0.32   3
  -1 -10  -4    0.88    0.34   3
   0  -8  -2   62.92    0.58   3
   1 -11  -7  104.41    1.01   3
   2 -11  -8   18.21    0.59   3
   2  -8  -3    0.28    0.30   3
   5 -10  -9   30.21    0.65   3
   5  -9  -7    3.55    0.49   3
   5  -6  -4    4.46    0.29   3
   6  -8  -7    9.55    0.47   3
   7  -9 -11    2.56    0.42   3
   9  -7 -14    5.86    0.32   3
   9  -7 -13    6.30    0.38   3
   0  -4   0   32.13    0.25   3
   3  -9  -5    2.26    0.38   3
   3  -7  -3   93.50    0.68   3
   6  -9  -9    2.69    0.46   3
   7  -9 -12    9.32    0.45   3
   8  -8 -12   25.50    0.55   3
   8  -3  -7  268.18    1.00   3
   9  -6 -11    9.01    0.43   3
   9  -5 -10   38.50    0.56   3
  -1 -10  -1   17.77    0.37   4
  -1  -8   1  770.17    1.66   4
   0  -7   2   59.50    0.50   4
   0  -3   2  230.03    0.59   4
   3  -5   3  238.51    0.89   4
   4 -13  -2    1.54    0.36   4
   5 -13  -2    6.66    0.43   4
   7  -9   1    1.04    0.33   4
  10  -9  -1   22.79    0.45   4
   2  -6   3  118.71    0.68   4
   2  -5   3 1276.89    1.91   4
   2  -4   3  423.34    1.02   4
   3  -4   3  971.61    1.59   4
   4 -14  -4   20.04    0.48   4
   4  -6   3  100.60    0.68   4
   6 -13  -2    0.16    0.36   4
   6  -8   2   28.14    0.50   4
   8  -8   1  139.14    0.90   4
   9  -9   0   81.17    0.75   4
  -2  -9  -1   63.98    0.50   4
  -2  -6   1   14.74    0.25   4
  -2  -5   1   82.51    0.41   4
  -1  -6   2  297.97    0.90   4
  -1  -5   2  363.64    0.90   4
   0  -8   2   56.79    0.54   4
   1  -6   3 1181.25    2.00   4
   1  -5   3    0.52    0.19   4
   2  -7   3  105.42    0.69   4
   3  -7   3    8.72    0.34   4
   4 -11   1    4.65    0.44   4
   4  -7   3  242.17    1.09   4
   4  -4   3   58.84    0.43   4
   7  -7   2  121.37    0.83   4
   7  -4   2   13.35    0.27   4
  10 -11  -2    0.38    0.26   4
  -1  -9   1   47.75    0.53   4
  -1  -7   2  410.87    1.17   4
   0 -12  -2    3.11    0.31   4
   1  -7   3   60.22    0.54   4
   3 -14  -4   10.95    0.37   4
   3 -10   2    0.66    0.39   4
   3  -3   3  170.45    0.63   4
   4 -14  -3    1.50    0.34   4
   4 -13  -1   25.00    0.59   4
   4 -10   2    9.43    0.51   4
   5 -14  -3    9.48    0.38   4
   5 -13  -1    1.41    0.46   4
   5  -6   3  128.82    0.76   4
   6  -9   2    7.57    0.45   4
   8  -9   1    3.87    0.38   4
   9  -7   1   31.25    0.49   4
  -2  -7   1   32.49    0.35   4
  -2  -4   1 1849.48    1.61   4
   2 -10   2   20.21    0.53   4
   2  -3   3 1033.17    1.44   4
   3 -14  -3   20.00    0.49   4
   4  -3   3    6.10    0.21   4
   7  -8   2   50.71    0.63   4
  -2  -9   0   12.50    0.32   4
  -1  -8   2    6.38    0.28   4
   1 -12   0    0.59    0.37   4
   1 -10   2   34.47    0.56   4
   1  -8   3   99.11    0.73   4
   3  -9   3    9.86    0.51   4
   4 -14  -2    4.76    0.37   4
   5  -8   3  118.91    0.89   4
   8  -6   2  113.77    0.76   4
  -2  -8   1    0.36    0.21   4
   1  -3   3    0.24    0.12   4
   3 -11   2   98.91    0.95   4
   4 -12   1   20.63    0.58   4
   4  -9   3   31.06    0.58   4
   5 -12   1    4.28    0.51   4
   6  -7   3  103.94    0.80   4
   6  -6   3  102.87    0.71   4
   6  -5   3  200.60    0.87   4
   7 -13  -1    4.47    0.35   4
   7 -11   1    0.20    0.36   4
   7  -9   2   48.00    0.64   4
   8 -10   1    8.68    0.41   4
   8  -7   2    3.18    0.36   4
  10  -9   0    3.24    0.30   4
  -3  -6   0  640.72    1.10   4
  -1 -11   0   96.00    0.77   4
  -1  -3   2  603.82    0.93   4
   1 -13  -1    2.41    0.36   4
   2 -12   1    0.66    0.38   4
   2 -11   2   27.85    0.60   4
   5 -11   2  108.83    1.00   4
   5  -9   3    1.31    0.38   4
   5  -3   3  300.83    0.86   4
   6  -8   3   19.60    0.53   4
   9 -11   0    3.10    0.35   4
   9  -9   1    3.18    0.37   4
  -3  -7   0    4.92    0.20   4
  -2 -10   0  377.16    1.30   4
  -2  -9   1  267.20    1.06   4
  -2  -7   2  105.80    0.62   4
  -2  -6   2   62.11    0.43   4
   1 -11   2   74.12    0.78   4
   2 -10   3   54.05    0.71   4
   2  -5   4  249.71    0.95   4
   3 -10   3    5.30    0.44   4
   3  -6   4  157.69    0.84   4
   3  -5   4  534.94    1.39   4
   3  -2   3  197.20    0.61   4
   4 -14  -1    1.31    0.33   4
   6 -13   0   16.73    0.51   4
   7 -10   2    2.18    0.44   4
   8 -12   0   16.41    0.43   4
  -2  -5   2   17.61    0.23   4
  -1  -7   3    2.20    0.25   4
   1 -10   3    4.09    0.42   4
   2  -2   3   70.01    0.35   4
   4  -6   4  180.69    0.91   4
   4  -5   4    1.59    0.27   4
   4  -2   3    0.11    0.12   4
   6 -11   2    9.04    0.47   4
   7  -7   3    1.05    0.36   4
   8 -11   1    7.73    0.40   4
   8  -9   2    4.77    0.41   4
  10 -10   0   17.54    0.41   4
  -3  -8   0    8.21    0.26   4
  -1 -11   1    3.45    0.35   4
  -1  -8   3  290.33    1.13   4
   0  -3   3  150.47    0.54   4
   1  -5   4 1197.80    1.95   4
   2  -4   4 1558.42    2.10   4
   3 -13   1    0.44    0.41   4
   3 -12   2   37.58    0.69   4
   4 -12   2   31.46    0.67   4
   4  -8   4  139.09    0.95   4
   6  -3   3    5.26    0.22   4
   7  -8   3   67.92    0.74   4
   7  -5   3    0.72    0.23   4
   9 -10   1   16.99    0.42   4
  -3  -6   1  279.93    0.80   4
  -2  -4   2  117.29    0.47   4
   0 -10   3  101.51    0.85   4
   2 -11   3    4.74    0.46   4
   2  -9   4   16.31    0.46   4
   3 -11   3   43.79    0.72   4
   4 -14   0   27.18    0.60   4
   4 -11   3    6.32    0.48   4
   4  -4   4  209.00    0.84   4
   5 -13   1    1.32    0.38   4
   5 -12   2   91.95    0.93   4
   5  -6   4   27.97    0.46   4
   5  -5   4   41.95    0.50   4
  -1 -12   0    0.24    0.30   4
   0  -5   4  235.61    0.87   4
   1 -12   2    0.19    0.37   4
   1  -4   4   88.22    0.52   4
   1  -2   3 6170.53    3.13   4
   3 -14   0    0.18    0.30   4
   4  -9   4   12.19    0.48   4
   5  -8   4    4.11    0.38   4
   5  -2   3   32.52    0.28   4
   6 -13   1   15.55    0.47   4
   6 -12   2   31.69    0.64   4
   7  -9   3    0.26    0.38   4
   8 -10   2   70.54    0.73   4
  -3  -5   1   19.80    0.22   4
  -2  -7   3   82.81    0.60   4
  -2  -6   3   32.27    0.38   4
   1 -14  -1    2.52    0.31   4
   1 -13   1    8.66    0.44   4
   3 -10   4    0.62    0.43   4
   5  -9   4   54.58    0.69   4
   5  -4   4  357.02    1.09   4
   6  -7   4    8.81    0.45   4
   8  -7   3   74.86    0.69   4
   9 -11   1    0.46    0.24   4
  -2  -8   3    0.28    0.25   4
  -1 -12   1   94.17    0.81   4
  -1 -10   3   44.06    0.60   4
  -1  -6   4  110.23    0.66   4
   0 -11   3   16.71    0.50   4
   0  -4   4  220.49    0.77   4
   1 -10   4    0.76    0.41   4
   2 -13   2    3.92    0.46   4
   2 -12   3    1.40    0.50   4
   2  -3   4    6.70    0.19   4
   3 -13   2  123.69    1.08   4
   3 -12   3   96.88    0.98   4
   4 -13   2   13.47    0.51   4
   4 -12   3   11.71    0.56   4
   4 -10   4   86.33    0.88   4
   6  -5   4   16.08    0.39   4
   7 -10   3   56.93    0.70   4
  -3  -7   2   16.93    0.32   4
  -2 -11   1  107.70    0.79   4
  -1  -8   4   67.78    0.64   4
   1 -14   0    1.34    0.30   4
   1  -6   5    7.49    0.37   4
   1  -3   4   77.67    0.45   4
   2  -6   5    2.44    0.30   4
   3 -14   1   60.50    0.76   4
   3  -8   5   27.93    0.59   4
   3  -6   5  145.50    0.85   4
   4 -14   1    0.13    0.31   4
   5 -13   2   20.78    0.53   4
   5 -12   3    2.85    0.48   4
   5 -10   4   60.06    0.75   4
   6  -9   4    2.14    0.46   4
   7 -12   2   19.09    0.46   4
  -3  -6   2  120.84    0.57   4
  -2  -9   3  441.98    1.47   4
   0 -10   4    5.39    0.44   4
   1 -11   4    7.77    0.56   4
   2 -14   1   12.19    0.44   4
   2 -11   4    4.40    0.47   4
   2  -5   5  281.10    1.06   4
   3 -11   4   43.12    0.72   4
   3  -5   5   64.34    0.55   4
   4 -11   4    0.39    0.41   4
   4  -6   5   38.11    0.53   4
   8  -9   3    6.48    0.36   4
  -3  -4   1  759.36    1.05   4
  -2 -11   2    2.05    0.38   4
  -2  -3   2   34.90    0.24   4
   0 -12   3   -0.16    0.41   4
   0  -2   3 2461.74    1.93   4
   3  -9   5    6.74    0.46   4
   4  -9   5  278.33    1.42   4
   5 -11   4   55.69    0.78   4
   5  -3   4    7.72    0.24   4
   6 -10   4   58.83    0.73   4
   6  -4   4   73.88    0.53   4
   7  -8   4   20.85    0.53   4
   7  -7   4   28.43    0.48   4
   7  -6   4   29.02    0.48   4
  -3 -10   1   22.40    0.39   4
  -3  -9   2   97.87    0.68   4
  -3  -5   2    6.41    0.17   4
  -2  -7   4  209.46    0.93   4
  -1 -10   4   28.84    0.55   4
  -1  -4   4   20.75    0.27   4
   0 -11   4   24.69    0.57   4
   2 -13   3   81.53    0.90   4
   2  -4   5   70.78    0.52   4
   3 -14   2   16.39    0.49   4
   3 -13   3    2.73    0.43   4
   3 -12   4    3.83    0.51   4
   3 -10   5  131.80    1.06   4
   4 -13   3   56.79    0.77   4
   5  -8   5  237.65    1.24   4
   5  -7   5    1.97    0.36   4
   8 -10   3    4.24    0.33   4
  -3  -7   3   79.76    0.57   4
  -2 -12   1   15.39    0.41   4
   0  -5   5    7.35    0.27   4
   1 -13   3    0.89    0.37   4
   1 -12   4   17.75    0.61   4
   1 -10   5   11.57    0.50   4
   2 -14   2    9.58    0.41   4
   2 -12   4    4.97    0.49   4
   3  -2   4  181.39    0.64   4
   4 -12   4   26.65    0.61   4
   4 -10   5    1.64    0.41   4
   5  -9   5    3.38    0.43   4
   5  -5   5   56.10    0.56   4
  -3  -8   3  352.08    1.20   4
  -3  -6   3    5.96    0.22   4
  -2  -5   4   36.98    0.37   4
  -1  -8   5  207.70    1.07   4
   0 -10   5   40.68    0.67   4
   1 -14   2    3.12    0.40   4
   2 -11   5   11.34    0.60   4
   3 -11   5    0.73    0.49   4
   4  -4   5   25.50    0.37   4
   6 -11   4    8.13    0.40   4
   6  -7   5   41.12    0.58   4
   7 -10   4    3.58    0.40   4
  -3  -9   3    0.16    0.29   4
  -2 -12   2  150.42    0.99   4
  -2 -10   4   40.63    0.65   4
  -1  -5   5   52.74    0.51   4
   0  -4   5  349.74    1.04   4
   1 -11   5    4.56    0.48   4
   1  -8   6   27.57    0.52   4
   1  -7   6    7.22    0.39   4
   2  -8   6  117.89    0.93   4
   2  -6   6   35.19    0.55   4
   4 -11   5   28.26    0.65   4
   5 -10   5   56.41    0.72   4
  -3  -5   3   24.61    0.30   4
  -3  -4   2    1.81    0.12   4
  -1 -10   5   23.24    0.55   4
   0 -11   5    4.28    0.46   4
   2 -14   3    2.57    0.38   4
   3 -14   3   81.18    0.86   4
   3 -13   4   26.66    0.60   4
   3  -9   6   49.43    0.71   4
   3  -3   5  171.29    0.73   4
   5  -4   5   23.06    0.39   4
   6  -9   5   59.04    0.70   4
  -3 -11   2  482.28    1.56   4
  -3  -7   4  121.27    0.73   4
  -2  -7   5  236.07    1.04   4
  -1 -12   4    0.66    0.42   4
  -1  -3   4    8.18    0.19   4
   0  -6   6    5.00    0.33   4
   1 -14   3   20.30    0.50   4
   1  -5   6   13.60    0.40   4
   2 -12   5   14.12    0.54   4
   2  -5   6    1.18    0.27   4
   3 -12   5   10.47    0.50   4
   3  -5   6  227.66    1.03   4
   4 -13   4    7.37    0.42   4
   4  -8   6  131.97    0.99   4
   4  -7   6   16.12    0.47   4
   5 -11   5   16.12    0.48   4
   6 -10   5   22.31    0.53   4
   7 -11   4   30.33    0.52   4
  -4  -8   2  222.94    0.89   4
  -4  -7   2    3.00    0.23   4
  -4  -6   1   22.91    0.25   4
  -3  -6   4    3.65    0.24   4
  -2 -11   4   17.14    0.50   4
  -2  -6   5   22.15    0.38   4
  -2  -4   4  307.92    0.88   4
  -2  -3   3 1145.26    1.40   4
  -1 -13   3   17.20    0.49   4
  -1 -11   5    6.31    0.44   4
  -1  -7   6    5.80    0.42   4
  -1  -4   5  416.85    1.12   4
  -1  -2   3   36.82    0.26   4
   1 -12   5    2.84    0.43   4
   1 -10   6    5.79    0.47   4
   3 -10   6    0.91    0.45   4
   4 -12   5    6.18    0.43   4
   4  -3   5   14.19    0.30   4
  -3 -11   3   27.45    0.55   4
  -2 -10   5    0.67    0.39   4
  -1  -9   6  113.11    0.92   4
  -1  -6   6   47.90    0.54   4
   0 -12   5    0.83    0.42   4
   0 -10   6   68.01    0.80   4
   0  -2   4  249.89    0.69   4
   1 -11   6   11.78    0.57   4
   2 -11   6   -0.10    0.43   4
   4 -10   6   10.03    0.47   4
   4  -5   6   18.13    0.39   4
   5  -9   6   30.43    0.63   4
   5  -8   6   12.46    0.46   4
   5  -7   6  231.89    1.17   4
   6 -11   5    1.77    0.38   4
   7  -9   5   -0.01    0.34   4
  -3 -10   4  145.39    0.95   4
  -3  -4   3  535.49    1.05   4
  -2  -5   5  577.95    1.38   4
   0 -11   6    1.84    0.51   4
   0  -3   5  719.71    1.37   4
   1  -4   6  265.64    0.99   4
   2 -14   4   24.15    0.53   4
   2 -13   5    2.60    0.42   4
   3 -13   5    1.60    0.40   4
   3 -11   6   19.97    0.55   4
   3  -4   6  128.62    0.74   4
   5  -6   6    8.98    0.35   4
  -4  -8   3    0.65    0.26   4
  -4  -7   3    3.89    0.23   4
  -3  -8   5   70.22    0.64   4
  -3  -7   5  283.32    1.11   4
  -2  -7   6   23.05    0.49   4
  -1 -13   4   38.20    0.62   4
  -1 -12   5    2.57    0.38   4
  -1  -5   6  324.90    1.13   4
   1 -14   4    2.36    0.31   4
   1 -13   5    0.40    0.37   4
   1  -8   7   78.39    0.82   4
   2  -8   7    6.98    0.45   4
   3  -8   7   22.30    0.58   4
   4 -11   6    0.14    0.36   4
   5 -10   6    5.33    0.40   4
   5  -3   5  108.47    0.60   4
   7 -10   5    5.19    0.34   4
  -4  -6   3   19.21    0.31   4
  -4  -5   1    7.88    0.15   4
  -3 -11   4  261.13    1.27   4
  -3  -6   5 1524.11    2.36   4
  -1 -11   6   32.19    0.63   4
   0 -14   4   33.34    0.60   4
   0  -8   7    0.76    0.39   4
   0  -4   6   21.66    0.36   4
   1 -12   6    4.00    0.48   4
   1 -10   7   20.25    0.63   4
   1  -6   7  115.29    0.83   4
   2 -12   6    3.59    0.44   4
   2 -10   7   23.45    0.64   4
   3 -12   6   -0.01    0.37   4
   3  -9   7   11.72    0.47   4
   3  -7   7    7.20    0.44   4
   4  -4   6   15.25    0.37   4
   6  -8   6    7.23    0.38   4
  -4  -8   4  251.98    1.06   4
  -2 -10   6  160.22    1.10   4
  -2  -4   5   19.39    0.29   4
  -1  -3   5    2.33    0.17   4
   0 -12   6    8.54    0.46   4
   0 -10   7   40.23    0.68   4
   0  -6   7    0.35    0.32   4
   2  -2   5   16.22    0.24   4
   3 -10   7    5.02    0.44   4
   3  -2   5  187.25    0.69   4
   3  -1   4  113.64    0.45   4
   4 -12   6   77.62    0.82   4
   4  -9   7   13.40    0.52   4
   5 -11   6   57.74    0.71   4
   6 -10   6   17.77    0.46   4
  -4  -7   4   32.35    0.41   4
  -3  -3   2   99.38    0.38   4
  -2 -13   4    2.41    0.34   4
  -1  -4   6    1.09    0.23   4
  -1  -2   4  465.96    0.95   4
   1 -11   7   12.13    0.51   4
   1  -5   7   53.33    0.57   4
   2 -11   7    2.25    0.42   4
   2  -5   7    8.88    0.34   4
   4  -6   7    0.66    0.39   4
  -4  -6   4  138.09    0.70   4
  -3 -12   4    7.35    0.38   4
  -3 -11   5   10.00    0.45   4
  -3  -9   6  124.49    0.93   4
  -3  -7   6  214.71    1.04   4
  -3  -5   5  256.78    0.93   4
  -3  -4   4   33.93    0.32   4
  -2  -5   6   81.69    0.60   4
  -1 -14   4    1.31    0.29   4
  -1 -12   6    0.72    0.39   4
  -1  -6   7  438.78    1.48   4
   0 -11   7    8.85    0.49   4
   0  -5   7  101.93    0.73   4
   1 -13   6   19.58    0.54   4
   1  -3   6  654.93    1.44   4
   2 -13   6    1.57    0.37   4
   3 -11   7    2.80    0.40   4
   3  -3   6  102.47    0.61   4
   4 -10   7    1.26    0.36   4
   4  -2   5  394.25    0.99   4
   4  -1   4  254.38    0.67   4
  -4  -8   5    3.70    0.41   4
  -4  -5   3   22.31    0.27   4
  -3 -10   6   17.48    0.55   4
  -2  -8   7   22.97    0.52   4
  -2  -7   7  121.74    0.87   4
  -1 -11   7  105.20    1.02   4
   0 -14   5    4.69    0.34   4
   0 -13   6    1.65    0.38   4
   0  -3   6    7.68    0.25   4
   0  -2   5  121.81    0.55   4
   1 -12   7   20.16    0.59   4
   1  -1   4 1020.43    1.31   4
   2 -12   7    5.23    0.46   4
   5  -9   7   62.89    0.71   4
  -4 -11   4  137.67    0.95   4
  -4  -7   5  168.05    0.86   4
  -3  -6   6    4.03    0.31   4
  -3  -3   3  403.35    0.84   4
  -2 -10   7   26.97    0.60   4
  -2  -6   7    8.34    0.37   4
  -2  -2   3  430.55    0.81   4
  -1  -5   7  176.23    0.90   4
   0  -9   8    8.09    0.48   4
   1  -4   7    6.85    0.32   4
   2  -8   8   39.85    0.65   4
   2  -7   8    4.76    0.42   4
   3 -12   7   80.59    0.84   4
   4  -3   6    0.79    0.21   4
   5 -10   7  120.99    0.93   4
  -4 -10   5    3.14    0.36   4
  -4  -6   5   46.12    0.49   4
  -4  -5   4  658.36    1.36   4
  -2  -4   6   61.29    0.50   4
  -2  -3   5   64.62    0.43   4
  -1 -14   5   45.01    0.62   4
  -1 -12   7    4.54    0.49   4
  -1  -9   8   80.69    0.86   4
   0 -10   8   23.98    0.60   4
   1 -10   8   18.48    0.56   4
   2 -10   8   59.95    0.78   4
   3  -9   8    4.21    0.38   4
   3  -8   8    5.82    0.47   4
   3  -4   7  364.14    1.23   4
  -3  -9   7    4.04    0.42   4
  -3  -7   7  108.78    0.81   4
  -3  -5   6  167.13    0.82   4
  -3  -4   5  140.64    0.65   4
  -2  -5   7  161.96    0.89   4
   0 -11   8    2.11    0.46   4
   1 -13   7    1.67    0.35   4
   2 -11   8    3.61    0.46   4
   3 -10   8    0.53    0.35   4
   4  -8   8   36.09    0.63   4
  -4 -11   5    3.60    0.37   4
  -4  -7   6   41.35    0.51   4
  -4  -4   2   50.50    0.30   4
  -3 -10   7   34.84    0.62   4
  -2 -13   6    0.20    0.33   4
  -1  -4   7   43.94    0.48   4
  -1  -2   5  872.92    1.41   4
   0 -13   7   25.38    0.54   4
   0  -1   4  318.49    0.75   4
   1  -5   8  627.27    1.79   4
   4  -9   8   10.33    0.42   4
   4  -7   8   16.23    0.45   4
  -4 -10   6   82.95    0.80   4
  -4  -4   3    0.72    0.14   4
  -3 -13   5    0.60    0.32   4
  -3 -11   7    1.69    0.45   4
  -3  -6   7   87.10    0.70   4
  -2 -14   5    7.17    0.34   4
  -2  -2   4   30.53    0.27   4
  -1 -11   8   27.55    0.63   4
   0  -5   8   53.31    0.60   4
   1 -12   8    3.99    0.40   4
   1  -2   6  377.27    1.03   4
   2 -12   8   15.69    0.50   4
   4 -10   8   95.56    0.86   4
   4  -6   8   18.64    0.48   4
  -4 -11   6   29.44    0.61   4
  -4  -6   6  381.37    1.26   4
  -2 -11   8   19.68    0.59   4
  -2  -6   8  290.51    1.28   4
  -1  -5   8   43.21    0.56   4
   0 -12   8   22.49    0.56   4
   0  -9   9   21.79    0.59   4
   0  -8   9   38.80    0.68   4
   0  -3   7   71.55    0.57   4
   1  -8   9    4.79    0.45   4
   1  -7   9    4.28    0.48   4
   2  -1   5   22.62    0.26   4
   3  -3   7   13.07    0.35   4
   5  -9   8  118.28    0.92   4
  -5  -8   5   71.64    0.62   4
  -4  -9   7   33.90    0.59   4
  -4  -7   7   77.71    0.73   4
  -3  -4   6   77.02    0.55   4
  -2  -4   7    4.49    0.28   4
  -2  -3   6   45.45    0.42   4
  -1 -12   8    0.70    0.38   4
  -1  -9   9   13.90    0.54   4
   0 -10   9    3.21    0.44   4
   0  -2   6  634.76    1.32   4
   1 -10   9   27.71    0.60   4
   1  -4   8   30.18    0.46   4
   1  -1   5   12.76    0.21   4
   2  -9   9   65.21    0.78   4
   3  -1   5    0.51    0.11   4
  -5 -10   5    3.95    0.34   4
  -5  -6   4    4.20    0.26   4
  -4 -10   7    5.14    0.44   4
  -4  -5   6   43.93    0.49   4
  -3 -10   8    7.83    0.47   4
  -3  -3   5    0.39    0.17   4
  -2  -8   9   12.10    0.56   4
  -2  -5   8    0.35    0.32   4
  -1 -10   9   27.94    0.63   4
  -1  -3   7   55.52    0.52   4
   0 -11   9   32.21    0.64   4
   0  -4   8  482.17    1.48   4
   1 -11   9    9.36    0.45   4
   1  -6   9    3.17    0.41   4
   2  -6   9    4.60    0.46   4
   3  -9   9   13.16    0.46   4
   3  -8   9   19.19    0.50   4
   4  -2   6  211.40    0.78   4
  -5  -9   6  146.66    0.95   4
  -4  -6   7  117.24    0.78   4
  -2 -10   9    7.12    0.48   4
  -2  -9   9  113.66    1.00   4
  -1 -11   9   -0.12    0.40   4
  -1  -6   9    6.72    0.41   4
  -1  -4   8  141.90    0.84   4
   2 -11   9   21.14    0.50   4
   3 -10   9   31.20    0.57   4
   4  -3   7   29.22    0.41   4
  -5 -10   6    4.81    0.37   4
  -5  -7   6   78.84    0.66   4
  -5  -6   5  139.81    0.73   4
  -4  -9   8   62.58    0.75   4
  -3 -13   7    1.52    0.33   4
  -2  -2   5   54.41    0.38   4
  -1  -2   6   83.32    0.50   4
  -1  -1   4  424.67    0.87   4
   0 -12   9    0.10    0.33   4
   0  -1   5 1857.32    1.96   4
   3  -6   9   19.51    0.47   4
   4  -9   9   95.39    0.85   4
   4  -8   9    3.53    0.39   4
  -4 -12   7    0.46    0.37   4
  -4 -10   8    2.94    0.40   4
  -3 -12   8   22.22    0.52   4
  -3 -10   9   12.41    0.56   4
  -3  -4   7  632.28    1.55   4
  -2 -13   8    6.85    0.35   4
  -2 -11   9   81.76    0.89   4
  -2  -4   8    6.05    0.38   4
   0  -9  10   57.32    0.81   4
   1  -2   7  901.18    1.73   4
   4 -10   9    0.25    0.25   4
   4  -7   9    9.11    0.38   4
  -5 -11   6   60.28    0.67   4
  -5 -10   7   33.19    0.62   4
  -5  -6   6    0.42    0.25   4
  -4 -11   8    0.35    0.44   4
  -4  -5   7  366.07    1.25   4
  -4  -4   6  139.80    0.72   4
  -3  -2   3   33.43    0.24   4
  -2 -12   9    9.69    0.47   4
  -1 -10  10    0.25    0.47   4
   0  -7  10   20.40    0.55   4
   0  -3   8   10.73    0.32   4
   0  -2   7  165.39    0.77   4
   1  -9  10   24.64    0.57   4
   1  -8  10   10.71    0.48   4
   1  -3   8  313.36    1.16   4
   2  -9  10   27.91    0.59   4
   2  -3   8  231.18    1.00   4
   2  -2   7    0.49    0.20   4
   3  -5   9  157.88    0.97   4
  -5  -7   7    0.95    0.36   4
  -5  -5   5    6.66    0.24   4
  -4  -6   8  510.27    1.63   4
  -4  -3   3 1260.23    1.49   4
  -3 -11   9    0.42    0.38   4
  -2  -8  10   49.70    0.73   4
   0 -11  10    0.34    0.34   4
   0  -6  10   29.99    0.63   4
   0  -4   9  163.97    0.97   4
   1 -11  10   14.05    0.46   4
   2 -10  10   29.89    0.55   4
   2  -1   6    9.57    0.24   4
   2   0   4  424.55    0.83   4
  -5  -9   8   10.14    0.53   4
  -5  -6   7   22.46    0.46   4
  -4 -13   7   63.75    0.71   4
  -4  -8   9   11.37    0.49   4
  -4  -3   2  153.52    0.46   4
  -4  -3   4    4.41    0.16   4
  -3 -13   8   89.70    0.82   4
  -3  -4   8  274.84    1.12   4
  -3  -2   4    0.34    0.13   4
  -2 -10  10  269.86    1.49   4
  -2  -2   6   83.51    0.50   4
  -1 -11  10   97.02    0.94   4
  -1  -6  10    2.28    0.42   4
  -1  -4   9  640.46    1.78   4
  -1  -2   7  260.05    0.94   4
  -1  -1   5    1.34    0.13   4
   3  -8  10   20.10    0.52   4
  -6  -8   5    8.19    0.31   4
  -5  -5   6  326.63    1.10   4
  -4  -5   8  224.97    1.06   4
  -4  -4   7   49.13    0.49   4
  -3  -9  10    4.89    0.46   4
  -2 -11  10    1.21    0.38   4
   3  -1   6  771.93    1.36   4
  -5 -11   8   11.03    0.48   4
  -4  -3   5  168.46    0.67   4
  -3  -7  10    1.97    0.43   4
  -3  -2   5   42.12    0.34   4
  -2  -3   8    0.67    0.27   4
  -1  -5  10  191.80    1.12   4
   0  -5  10   11.10    0.46   4
  -5  -6   8   25.63    0.48   4
  -5  -5   7   12.13    0.34   4
  -4  -9  10   55.47    0.80   4
  -3 -11  10  183.56    1.23   4
  -3  -6  10  102.90    0.89   4
  -2 -12  10   68.28    0.78   4
  -2  -2   7 1461.51    2.16   4
  -1 -10  11   30.80    0.63   4
  -1  -9  11    3.02    0.43   4
   0 -10  11    3.07    0.40   4
   0  -9  11   34.51    0.63   4
   0  -8  11    0.75    0.37   4
   0  -7  11  312.66    1.56   4
   1  -9  11    3.30    0.38   4
   1  -8  11   56.04    0.75   4
   3  -6  10    9.77    0.38   4
  -6 -10   7   40.39    0.62   4
  -6  -9   7   75.16    0.72   4
  -5 -10   9   31.65    0.60   4
  -5  -8   9    4.51    0.42   4
  -5  -7   9   24.95    0.60   4
  -5  -4   3  361.59    0.84   4
  -5  -4   5  369.19    1.03   4
  -4 -12   9    3.02    0.34   4
  -4 -10  10    8.96    0.47   4
  -4  -8  10    4.11    0.47   4
  -4  -4   8    5.72    0.37   4
  -4  -3   6    1.97    0.22   4
  -3  -4   9  268.42    1.19   4
  -2  -9  11  180.12    1.24   4
  -2  -8  11   76.68    0.87   4
  -2  -7  11   35.87    0.72   4
  -1  -7  11  332.03    1.61   4
  -1  -1   6  282.32    0.85   4
   0  -3   9  577.95    1.63   4
   0  -2   8    4.80    0.27   4
   1 -10  11    1.70    0.30   4
   1  -7  11    8.62    0.43   4
   1  -3   9    9.68    0.37   4
  -6  -6   6    8.18    0.34   4
  -5 -12   8    2.57    0.33   4
  -5  -4   6  404.61    1.15   4
  -4 -11  10   16.35    0.50   4
  -3  -9  11   37.94    0.67   4
  -2 -11  11    4.72    0.39   4
  -2  -1   5  256.40    0.74   4
  -1 -11  11   16.81    0.47   4
  -1  -6  11   20.24    0.55   4
   0   0   4 9999.99    3.95   4
   1  -4  10    1.48    0.43   4
   2  -9  11    8.46    0.36   4
   2  -8  11   12.50    0.41   4
   3  -5  10   10.32    0.40   4
  -6 -10   8   88.31    0.84   4
  -6  -9   8    5.34    0.42   4
  -5  -5   8   55.55    0.59   4
  -3 -10  11   17.17    0.54   4
  -3  -7  11    3.71    0.45   4
  -2  -6  11   31.33    0.63   4
   1  -6  11  227.27    1.25   4
   1   0   5   37.19    0.29   4
   2  -1   7   36.03    0.38   4
   3  -2   8    8.14    0.30   4
  -6  -6   7   15.67    0.40   4
  -5 -12   9    4.16    0.34   4
  -5 -10  10   11.74    0.50   4
  -5  -9  10  180.97    1.20   4
  -5  -8  10   50.86    0.72   4
  -4  -8  11   52.24    0.80   4
  -3 -11  11   10.76    0.43   4
  -3  -2   7   16.18    0.31   4
  -2  -2   8  184.42    0.85   4
   0  -5  11    7.52    0.51   4
   3   0   5   33.57    0.26   4
  -6 -11   8    8.18    0.37   4
  -6  -8   9    0.87    0.41   4
  -6  -5   6   89.65    0.62   4
  -5  -7  10    4.99    0.45   4
  -4 -10  11    1.72    0.42   4
  -4  -4   9    7.49    0.37   4
  -2  -5  11   50.63    0.69   4
  -2  -1   6   91.40    0.51   4
  -1  -9  12  206.41    1.28   4
  -1  -1   7  334.76    1.01   4
   0  -9  12   15.93    0.47   4
   3  -1   7   74.53    0.49   4
  -6 -10   9    7.37    0.42   4
  -6  -5   7   51.59    0.55   4
  -4 -11  11   11.26    0.42   4
  -4  -3   8    0.40    0.25   4
  -4  -2   5  149.39    0.62   4
  -3  -3   9    3.51    0.33   4
  -2 -10  12   56.50    0.72   4
  -2  -7  12   56.00    0.80   4
  -1 -10  12   44.81    0.65   4
  -1  -3  10    8.95    0.43   4
   0  -7  12   32.75    0.60   4
   0  -2   9    1.79    0.26   4
   1  -8  12    1.27    0.35   4
   1  -2   9  166.44    0.88   4
  -6 -11   9    2.95    0.34   4
  -5  -9  11  161.15    1.16   4
  -5  -8  11    6.59    0.55   4
  -5  -3   4   11.56    0.22   4
  -5  -3   5  136.92    0.61   4
  -5  -3   6    5.07    0.27   4
  -4  -2   6  205.29    0.78   4
  -3 -10  12   20.91    0.53   4
  -3  -9  12   73.59    0.84   4
  -3  -8  12   -0.04    0.42   4
  -3  -7  12  107.73    1.03   4
  -3  -2   8  314.37    1.12   4
  -2  -3  10  135.67    0.91   4
  -1  -4  11   30.70    0.62   4
  -1  -2   9  194.20    0.94   4
   0  -4  11    1.42    0.47   4
   1  -7  12    2.37    0.38   4
  -7  -8   7   16.26    0.41   4
  -7  -7   6   56.23    0.55   4
  -6 -10  10   85.99    0.87   4
  -6  -9  10  110.01    0.95   4
  -6  -8  10   16.13    0.50   4
  -6  -6   9    1.62    0.39   4
  -6  -5   8    4.69    0.32   4
  -4  -9  12   83.04    0.90   4
  -4  -8  12    3.90    0.53   4
  -4  -2   3  633.08    1.01   4
  -2  -6  12    9.52    0.49   4
  -2  -1   7  387.79    1.10   4
   0  -6  12  191.98    1.19   4
   1  -4  11   18.74    0.51   4
   1  -1   8   72.93    0.53   4
   2  -8  12    4.42    0.32   4
   2   0   6  766.30    1.29   4
  -7  -9   8  194.40    1.08   4
  -7  -8   8    5.29    0.38   4
  -6  -7  10   16.73    0.51   4
  -5 -11  11    1.17    0.33   4
  -5  -4   9  157.59    0.92   4
  -5  -3   7    2.34    0.26   4
  -4 -10  12   14.89    0.48   4
  -4  -7  12  434.44    1.85   4
  -4  -5  11  155.13    1.07   4
  -4  -2   7  140.91    0.71   4
  -3  -6  12   67.33    0.82   4
  -3  -3  10  276.15    1.22   4
  -3  -1   5   18.12    0.24   4
  -1  -1   8   20.68    0.35   4
  -1   0   5  134.67    0.54   4
   0   0   6  376.52    0.97   4
   1  -6  12    1.75    0.36   4
   2  -1   8  249.87    0.92   4
  -7  -9   9    0.34    0.39   4
  -6 -11  10   -0.05    0.29   4
  -6  -6  10   15.62    0.49   4
  -6  -4   7  136.19    0.78   4
  -5  -3   3  901.98    1.25   4
  -3  -1   6   34.94    0.35   4
  -2  -5  12    2.11    0.42   4
  -1  -5  12  136.47    1.04   4
  -7 -10   9    4.80    0.41   4
  -7  -8   9   89.60    0.81   4
  -7  -7   9    0.35    0.44   4
  -7  -6   7   33.93    0.48   4
  -6 -10  11  166.05    1.16   4
  -6  -9  11   29.44    0.58   4
  -6  -8  11   79.11    0.84   4
  -6  -4   4    6.78    0.22   4
  -5 -10  12   70.10    0.81   4
  -5  -9  12    5.21    0.43   4
  -5  -8  12   43.47    0.70   4
  -5  -3   8  149.34    0.82   4
  -4  -6  12  154.32    1.14   4
  -3  -8  13   23.91    0.61   4
  -3  -5  12   14.77    0.54   4
  -2  -9  13   23.42    0.52   4
  -2  -8  13   22.01    0.54   4
  -2  -7  13    4.31    0.46   4
  -2  -1   8  277.08    1.02   4
  -1  -7  13   -0.04    0.38   4
  -1  -3  11    2.06    0.38   4
  -1  -2  10   64.92    0.66   4
   0  -8  13    1.91    0.34   4
   0  -2  10  144.84    0.90   4
   1  -5  12  290.61    1.38   4
   2  -6  12   40.32    0.56   4
  -6  -7  11    3.56    0.44   4
  -6  -5  10   34.65    0.63   4
  -6  -4   8    7.05    0.33   4
  -5  -7  12   63.26    0.81   4
  -4  -3  10   11.35    0.42   4
  -3  -1   7   34.69    0.39   4
  -2  -2  10    6.22    0.40   4
   0  -7  13   39.09    0.60   4
   1  -3  11  209.26    1.10   4
   1  -2  10    4.88    0.32   4
   1   0   7   13.85    0.28   4
  -7 -10  10   98.28    0.89   4
  -7  -9  10   86.39    0.83   4
  -7  -8  10   56.81    0.73   4
  -6 -11  11    3.59    0.31   4
  -6  -4   9   80.55    0.74   4
  -5  -6  12    1.76    0.45   4
  -4  -9  13   34.13    0.61   4
  -4  -8  13   23.00    0.56   4
  -4  -7  13   23.10    0.64   4
  -3  -6  13   40.25    0.73   4
  -1  -1   9  321.93    1.17   4
   0  -4  12   21.47    0.51   4
   1  -1   9   59.55    0.56   4
  -6  -8  12    3.58    0.44   4
  -5  -4  11  394.50    1.61   4
  -4  -2   9  125.29    0.79   4
  -3  -2  10   70.77    0.67   4
  -3  -1   8   14.82    0.35   4
  -2   0   4  380.27    0.84   4
  -1   0   7   78.67    0.54   4
   1  -4  12   88.52    0.80   4
  -7  -6  10   39.13    0.63   4
  -6 -10  12   22.03    0.51   4
  -6  -7  12   12.05    0.51   4
  -6  -5  11   57.18    0.74   4
  -6  -3   6    0.62    0.25   4
  -6  -3   7 1356.44    2.23   4
  -5  -8  13  129.92    1.07   4
  -5  -3   2   65.81    0.32   4
  -5  -2   5  260.32    0.82   4
  -3  -5  13   71.40    0.87   4
  -2  -5  13   72.70    0.81   4
  -2   0   6   37.93    0.35   4
  -1  -5  13   -0.36    0.39   4
   2  -1   9    9.18    0.32   4
  -7 -10  11   28.46    0.52   4
  -7  -7  11   34.55    0.62   4
  -6  -3   8   71.42    0.61   4
  -5  -2   8  284.83    1.09   4
  -4  -1   6  144.61    0.66   4
  -4  -1   7   30.58    0.38   4
  -3  -8  14   41.65    0.67   4
  -2  -8  14    9.57    0.39   4
  -1  -3  12   20.23    0.57   4
  -8  -8   9    0.22    0.39   4
  -8  -7   8    1.01    0.39   4
  -7  -6  11    4.29    0.43   4
  -7  -5  10  198.09    1.17   4
  -6  -3   9   46.68    0.61   4
  -5  -6  13   27.39    0.64   4
  -4  -8  14    4.12    0.41   4
  -3  -7  14    2.02    0.40   4
  -3  -3  12   39.04    0.64   4
  -3  -1   9  127.98    0.79   4
  -2  -7  14    0.30    0.32   4
  -1  -7  14   67.80    0.75   4
  -1  -1  10  109.35    0.79   4
   0  -3  12    2.53    0.36   4
   0  -1  10    0.17    0.33   4
   0   0   8 1266.31    2.08   4
  -8  -9  10   51.61    0.67   4
  -7  -9  12   10.57    0.44   4
  -7  -8  12    4.60    0.41   4
  -7  -7  12    8.99    0.54   4
  -7  -4   6   68.51    0.55   4
  -7  -4   7  416.98    1.30   4
  -7  -4   8   94.37    0.71   4
  -6  -9  13    2.09    0.35   4
  -6  -8  13   13.25    0.51   4
  -6  -7  13  203.09    1.32   4
  -4  -7  14    0.72    0.40   4
  -3  -6  14    0.15    0.46   4
  -3  -4  13  138.82    1.08   4
  -2  -6  14    2.55    0.37   4
  -2  -4  13    9.20    0.46   4
  -2  -1  10  251.92    1.13   4
  -1  -6  14    9.57    0.45   4
  -1  -4  13    5.39    0.45   4
   1  -5  13    0.44    0.29   4
  -8  -7  10    4.68    0.48   4
  -8  -6   7    0.95    0.33   4
  -7 -10  12    0.63    0.28   4
  -7  -5  11    8.62    0.53   4
  -5  -8  14   14.45    0.49   4
  -4  -6  14   17.03    0.56   4
  -4  -4  13    3.32    0.54   4
  -4  -3  12    0.35    0.43   4
  -2   0   8   67.27    0.55   4
   0  -4  13    5.70    0.37   4
   1  -3  12   31.23    0.51   4
   1   1   5   11.11    0.19   4
   2   0   8  700.18    1.48   4
  -8  -9  11  101.71    0.92   4
  -8  -8  11   -0.10    0.43   4
  -5  -7  14    4.53    0.44   4
  -5  -2  10    1.64    0.36   4
  -4  -1   9   37.16    0.49   4
  -3  -5  14   15.52    0.53   4
  -3  -1  10   24.43    0.47   4
  -3   0   7  120.44    0.66   4
   0  -6  14   85.75    0.78   4
  -8  -7  11   49.97    0.71   4
  -7  -9  13    5.87    0.40   4
  -7  -8  13    7.80    0.42   4
  -6  -5  13    6.40    0.51   4
  -5  -4  13    3.94    0.47   4
  -1  -5  14    6.39    0.40   4
   0   1   4  317.79    0.77   4
 -12  -3  11   58.94    0.72   5
 -12  -2  11  193.35    1.24   5
 -11   2  18    0.53    0.24   5
 -11   3  12   47.59    0.84   5
 -10  -1   7   81.83    0.78   5
  -9   5  11   70.75    0.93   5
  -8   1   5  153.58    0.89   5
  -8   5  17    9.43    0.40   5
  -8   6  13    0.31    0.56   5
  -7   1   4  526.16    1.47   5
  -7   3   5   -0.13    0.29   5
  -6   4   5   12.89    0.37   5
  -6   6   8   54.90    0.75   5
  -4   6   6  401.81    1.44   5
 -12  -1  18   -0.21    0.22   5
 -12   1  15  112.58    1.09   5
 -11  -3   9    3.56    0.41   5
 -11  -1   9   75.34    0.85   5
 -11   1  10   29.58    0.72   5
 -11   3  13   24.80    0.70   5
 -11   3  14   32.02    0.72   5
 -10   1   8   21.94    0.63   5
 -10   3  18    2.55    0.25   5
 -10   4  16  144.31    1.12   5
  -9   2   7   44.29    0.64   5
  -8   5   9  120.33    1.03   5
  -7   6  10   35.15    0.76   5
  -7   6  15    4.86    0.46   5
  -5   6   7   25.28    0.49   5
 -12  -3  12    1.81    0.46   5
 -11  -2   9   35.57    0.58   5
 -11   2  17   24.05    0.54   5
 -10   2   9    0.39    0.46   5
 -10   3  10   44.56    0.76   5
 -10   4  15    2.49    0.49   5
  -9   3   8  643.24    2.12   5
  -9   4  17    3.48    0.38   5
  -9   5  13    8.54    0.55   5
  -9   5  14   40.31    0.75   5
  -8   4  18    2.02    0.28   5
 -12  -2  17    0.72    0.27   5
 -12  -1  13   34.93    0.71   5
 -12   0  14  226.19    1.44   5
 -12   0  16    2.60    0.41   5
 -11   2  16   24.73    0.63   5
 -10   0   8    4.84    0.50   5
 -10   3  17   22.46    0.54   5
  -9   4  10    1.68    0.50   5
  -8   2   6  107.09    0.80   5
  -8   4   8  118.02    0.98   5
  -7   5   8    4.79    0.42   5
  -7   6  13  288.26    1.62   5
  -6   6   9    2.24    0.43   5
  -4   5   5 1821.00    2.76   5
  -3   6   6    2.47    0.24   5
 -12  -4  14    3.94    0.36   5
 -12  -3  13   84.00    0.83   5
 -12  -3  16   -0.03    0.31   5
 -12  -1  14   39.68    0.73   5
 -12  -1  15  112.32    1.03   5
 -11   1  11  296.15    1.59   5
 -11   2  14    2.32    0.52   5
 -10   2  18   16.10    0.48   5
 -10   3  11   13.25    0.60   5
  -9   1   7   32.81    0.55   5
  -9   3  18   14.84    0.44   5
  -9   4  16   47.63    0.75   5
  -8  -1   5  158.92    0.82   5
  -7   2   5 1084.58    2.20   5
  -6   2   4 1074.66    2.04   5
  -4   6   7  117.98    0.85   5
 -12  -3  14   15.26    0.48   5
 -12  -3  15    4.10    0.38   5
 -12  -2  14   97.70    0.93   5
 -12  -2  15    4.05    0.39   5
 -11  -3  10   30.94    0.63   5
 -11   1  17    8.97    0.44   5
 -10  -1   8   24.57    0.53   5
 -10   1   9    7.16    0.47   5
 -10   2  10   14.92    0.58   5
  -9   2   8   96.53    0.88   5
  -8   5  11    6.79    0.51   5
  -8   5  12    4.83    0.57   5
  -8   5  14   23.13    0.69   5
  -7   3   6    7.78    0.36   5
  -7   5   9    0.98    0.48   5
  -7   5  16    3.56    0.42   5
  -6   6  10   15.67    0.53   5
  -5   4   5  394.99    1.32   5
 -11   0  11  387.45    1.75   5
 -11   1  13   23.03    0.72   5
 -11   1  16   14.78    0.55   5
 -10  -3   8    1.25    0.31   5
 -10  -2   8  313.17    1.32   5
 -10   2  17   28.76    0.62   5
 -10   3  13  114.68    1.11   5
 -10   3  14   30.19    0.71   5
 -10   3  15   46.90    0.77   5
  -9   0   7   59.79    0.67   5
  -9   4  12    1.85    0.54   5
  -9   4  14    1.15    0.56   5
  -9   4  15  112.03    1.07   5
  -8   1   6    2.76    0.30   5
  -8   4  17    0.52    0.28   5
  -8   4  17    0.46    0.18   5
 -11  -3  18    3.13    0.26   5
 -11  -2  18   -0.28    0.22   5
 -11  -1  11  268.52    1.45   5
 -11   0  17    6.43    0.43   5
 -11   1  14  188.32    1.34   5
 -11   1  15   98.62    1.00   5
 -10   1  18    0.10    0.28   5
 -10   2  11  122.76    1.08   5
  -9   3  17    0.91    0.39   5
  -8   3   8    9.09    0.51   5
  -8   3  18    1.00    0.29   5
  -6   5   8    4.96    0.40   5
  -4   6   8  510.14    1.70   5
 -11  -2  11   91.42    0.89   5
 -11  -1  17    7.93    0.44   5
 -11   0  13   48.83    0.84   5
 -10   1  10   85.28    0.89   5
 -10   2  16   74.70    0.89   5
  -9  -1   7   34.16    0.55   5
  -9   1   8   60.64    0.70   5
  -9   2   9   94.12    0.92   5
  -9   2  18    0.73    0.30   5
  -8   2   7   54.18    0.63   5
  -8   4  10   45.94    0.73   5
  -8   4  16   20.56    0.55   5
  -7   4   8   95.48    0.84   5
  -7   4  17    2.00    0.39   5
  -5   6  10   30.07    0.63   5
  -4   5   6   39.30    0.51   5
 -11  -5  16   10.91    0.37   5
 -11  -4  17   21.94    0.44   5
 -11  -3  17   11.46    0.41   5
 -11   0  15   39.30    0.71   5
 -10  -1   9    8.18    0.46   5
 -10   1  17   14.58    0.52   5
 -10   2  15  200.99    1.39   5
  -9  -2   7   45.89    0.56   5
  -7   2   6  266.89    1.14   5
  -7   5  11    8.17    0.49   5
  -7   5  12  140.03    1.20   5
  -5   6  11    6.78    0.52   5
  -5   6  12    2.75    0.53   5
 -11  -4  16   -0.09    0.32   5
 -11  -3  12   53.00    0.73   5
 -11  -1  13   25.16    0.62   5
 -11  -1  14  184.35    1.33   5
 -11  -1  15   95.46    1.01   5
 -11  -1  16   16.18    0.54   5
 -10  -3   9   24.48    0.52   5
 -10  -2   9    1.07    0.37   5
 -10   0  10   51.08    0.72   5
 -10   1  11    9.47    0.54   5
  -9  -3   7    3.44    0.28   5
  -9   0  19    0.49    0.22   5
  -9   3  12  482.72    2.06   5
  -9   3  15    3.17    0.51   5
  -8   3   9   14.63    0.56   5
  -8   3  17   23.01    0.57   5
  -8   4  11  164.22    1.21   5
  -8   4  12  389.61    1.84   5
  -8   4  14   23.03    0.68   5
  -7   2  19    1.12    0.20   5
  -7   3   7   43.89    0.58   5
  -7   3  18    2.25    0.30   5
  -6   4  17    0.44    0.33   5
  -6   5  15   13.05    0.53   5
  -4   6   9    3.59    0.35   5
  -3   6   8    2.25    0.31   5
 -11  -4  13   36.31    0.60   5
 -11  -4  14    0.68    0.41   5
 -11  -4  15   15.75    0.52   5
 -11  -3  16  108.38    0.91   5
 -11  -2  13  201.41    1.30   5
 -11  -2  14    3.43    0.51   5
 -11  -2  15   27.88    0.65   5
 -11  -2  16   25.99    0.57   5
 -10  -1  18    0.08    0.29   5
 -10   1  16    2.35    0.45   5
  -9   2  10  127.33    1.03   5
  -9   2  17    3.71    0.41   5
  -9   3  14    7.65    0.55   5
  -8   1  19    0.93    0.23   5
  -8   2   8  145.93    1.00   5
  -7   0   5   35.93    0.42   5
  -7   4   9    4.41    0.42   5
  -7   4  16    1.55    0.42   5
  -6   3   6    0.61    0.27   5
  -4   6  10   23.98    0.56   5
 -11  -3  14   34.55    0.64   5
 -11  -3  15    1.92    0.41   5
 -10  -4  18    3.28    0.26   5
 -10  -2  18   17.31    0.47   5
 -10  -1  10   81.42    0.82   5
 -10   1  14    7.50    0.56   5
 -10   1  15    8.86    0.55   5
  -9   2  16    8.45    0.55   5
  -8   3  16    1.94    0.50   5
  -6   3  18    4.32    0.29   5
  -6   5  10   34.01    0.63   5
  -6   5  14    1.29    0.42   5
  -5   5   8   53.84    0.63   5
  -5   5  15   57.42    0.77   5
  -4   6  11   91.61    0.84   5
  -4   6  12  160.63    1.09   5
 -10  -4  10   33.76    0.57   5
 -10  -3  10   45.04    0.66   5
 -10  -3  18    2.99    0.24   5
 -10  -2  10   15.95    0.50   5
 -10   0  16   29.04    0.70   5
  -9  -2  19    3.04    0.26   5
  -9  -1   8   66.77    0.67   5
  -8  -3   6    0.49    0.24   5
  -8   3  10   11.47    0.50   5
  -7   3  17    2.20    0.39   5
  -7   4  10   86.56    0.87   5
  -6   5  11   56.84    0.77   5
  -4   5   7  356.79    1.30   5
 -10  -5  17   33.84    0.49   5
 -10  -1  11   10.52    0.50   5
  -9  -2   8  103.90    0.78   5
  -9   1  10  130.27    1.01   5
  -9   1  17    3.94    0.41   5
  -9   2  12  367.37    1.75   5
  -9   2  14   41.78    0.77   5
  -8   2   9   10.96    0.52   5
  -8   2  17    0.42    0.39   5
  -8   3  11  190.39    1.26   5
  -8   3  15   20.96    0.61   5
  -7   1   6  216.14    0.98   5
  -7   1  19    1.66    0.20   5
  -7   2   7  323.08    1.28   5
  -7   2  18    0.45    0.32   5
  -6   4  16   50.37    0.71   5
  -5   5  14   73.83    0.86   5
 -10  -4  11    8.56    0.47   5
 -10  -4  17    6.93    0.32   5
 -10  -3  17   21.51    0.50   5
 -10  -2  11  120.51    1.01   5
 -10  -2  17   31.27    0.59   5
 -10  -1  12  319.16    1.61   5
 -10  -1  16    2.61    0.43   5
 -10   0  14  122.62    1.13   5
  -9  -3   8  737.94    1.85   5
  -8   1   8   95.94    0.78   5
  -7   4  12   25.37    0.61   5
  -7   4  13   52.77    0.78   5
 -10  -5  12   14.67    0.51   5
 -10  -5  16   10.56    0.38   5
 -10  -2  16   73.99    0.89   5
 -10  -1  14    8.13    0.60   5
 -10  -1  15    9.98    0.52   5
  -9  -1  18   24.45    0.51   5
  -9   0  17    2.85    0.43   5
  -9   1  11    4.14    0.49   5
  -8  -1   7   24.66    0.46   5
  -8  -1  19    0.97    0.24   5
  -8   2  16   39.40    0.76   5
  -7   3   9  149.39    1.00   5
  -7   3  16    3.49    0.44   5
  -6   1  19    2.54    0.21   5
  -6   3  17   27.61    0.54   5
  -6   4  15   17.78    0.59   5
  -5   4  16    2.93    0.36   5
  -5   5  10  146.42    1.02   5
  -5   5  12   54.15    0.79   5
  -5   5  13   54.71    0.74   5
  -4   5   8  236.87    1.10   5
  -4   5  14   30.49    0.60   5
 -10  -5  13   55.58    0.74   5
 -10  -5  14    2.76    0.40   5
 -10  -5  15  111.30    0.90   5
 -10  -4  16  153.09    1.06   5
 -10  -3  16   84.56    0.86   5
 -10  -2  12  343.06    1.62   5
 -10  -2  15  214.04    1.40   5
  -9  -4  18    0.43    0.26   5
  -9  -3  18   15.25    0.45   5
  -9  -2  18    0.77    0.32   5
  -9   1  12    6.98    0.52   5
  -9   1  14   73.62    0.97   5
  -9   1  15   65.36    0.90   5
  -8   1  17    3.77    0.49   5
  -8   2  10   13.18    0.51   5
  -7   2  17   11.67    0.52   5
  -5   3   6    6.10    0.32   5
  -4   4  16   19.66    0.52   5
  -3   5   7    0.61    0.23   5
 -10  -4  13   -0.01    0.47   5
 -10  -4  15    2.36    0.39   5
 -10  -3  13  112.54    1.04   5
 -10  -3  15   44.50    0.70   5
 -10  -2  14   22.74    0.60   5
  -9  -6  17   32.45    0.49   5
  -9  -4   9    4.96    0.38   5
  -9  -2   9  110.78    0.84   5
  -9  -1  17    4.53    0.44   5
  -8  -3  19    4.90    0.26   5
  -8  -2   7   53.55    0.56   5
  -8   0   8    6.44    0.35   5
  -8   1   9  581.86    1.85   5
  -8   2  11    0.70    0.45   5
  -8   2  15  121.66    1.09   5
  -7   1   7    1.35    0.28   5
  -7   2   8  146.52    0.92   5
  -7   3  10   23.13    0.55   5
  -7   3  15   33.44    0.67   5
  -6   4  10   67.31    0.75   5
  -5   2  18    5.52    0.35   5
  -5   3  17    4.24    0.37   5
  -5   4   8   70.22    0.69   5
  -4   5  13    8.73    0.51   5
  -9  -2  17    3.75    0.46   5
  -9  -1  10  129.21    0.96   5
  -9   0  11   10.57    0.51   5
  -9   0  15   28.37    0.74   5
  -8  -3   7  249.28    1.03   5
  -8  -1  18    1.62    0.38   5
  -8   2  13   14.25    0.59   5
  -7  -1  19    2.40    0.26   5
  -7   3  11   36.17    0.65   5
  -6   3  16   20.03    0.54   5
  -6   4  11   30.59    0.60   5
  -6   4  12  180.58    1.22   5
  -6   4  13   42.18    0.72   5
  -4   5  10    1.53    0.40   5
  -9  -6  16   -0.42    0.30   5
  -9  -5  17   19.85    0.42   5
  -9  -3  17    0.63    0.41   5
  -9  -2  10  131.04    0.98   5
  -9  -1  16    4.33    0.50   5
  -8   1  10    1.22    0.40   5
  -8   1  16   14.33    0.56   5
  -7  -1   6  221.56    0.93   5
  -7   2  16   19.23    0.60   5
  -7   3  13  191.59    1.29   5
  -6   1  18    0.43    0.34   5
  -6   2  17    4.94    0.44   5
  -4   5  11  155.05    1.04   5
  -3   5   8  234.80    1.06   5
  -9  -5  10   41.28    0.55   5
  -9  -4  10    1.63    0.40   5
  -9  -3  10   40.69    0.65   5
  -9  -2  16    8.24    0.55   5
  -9  -1  11    3.59    0.43   5
  -9  -1  15   62.11    0.91   5
  -8  -5  18    4.85    0.28   5
  -8  -2  18    7.05    0.38   5
  -8  -1   8  111.85    0.78   5
  -8   1  15   12.28    0.60   5
  -7  -3  19    1.53    0.22   5
  -7  -2  19    1.44    0.18   5
  -7   1  17    0.55    0.41   5
  -7   2   9  162.84    1.01   5
  -6  -1  19    3.14    0.29   5
  -6   1   6  173.39    0.83   5
  -6   2   7   87.56    0.66   5
  -6   3  15  135.61    1.11   5
  -5   3  16   18.76    0.59   5
  -4   4  15   46.18    0.66   5
  -9  -5  16   10.68    0.42   5
  -9  -4  16   46.38    0.70   5
  -9  -3  16   41.73    0.74   5
  -9  -2  11   47.59    0.72   5
  -9  -1  14   74.63    0.90   5
  -8  -4  18    2.76    0.29   5
  -8  -3  18    0.81    0.25   5
  -8  -1  17    4.55    0.51   5
  -8   1  11   83.69    0.86   5
  -7  -2   6  265.84    0.99   5
  -7   0   7   33.60    0.45   5
  -7   1   8   68.17    0.64   5
  -7   2  10    1.25    0.46   5
  -7   2  15   46.22    0.77   5
  -5   4  10   10.01    0.43   5
  -5   4  13    3.90    0.46   5
  -3   4  15   27.24    0.57   5
  -3   5   9  108.73    0.78   5
  -3   5  12   15.27    0.45   5
  -9  -6  13    8.10    0.47   5
  -9  -6  14    7.88    0.40   5
  -9  -5  15    0.73    0.44   5
  -9  -4  11   11.35    0.49   5
  -9  -3  11    4.86    0.49   5
  -9  -2  12  344.52    1.63   5
  -9  -2  15   17.05    0.61   5
  -8  -6  17    3.58    0.30   5
  -8  -2   8  160.74    0.90   5
  -8   0  10  778.54    2.19   5
  -7  -1  18   15.24    0.48   5
  -6  -2  19    4.67    0.29   5
  -6   0  18    2.47    0.39   5
  -6   2  16   17.37    0.56   5
  -6   3  10   34.37    0.58   5
  -5  -1  19    4.16    0.29   5
  -5   2  17   32.61    0.59   5
  -4   3  16    1.91    0.41   5
  -3   5  11   94.90    0.81   5
  -9  -5  14   41.88    0.71   5
  -9  -4  15  108.04    0.98   5
  -9  -3  12  511.44    1.94   5
  -9  -3  14    6.92    0.54   5
  -9  -3  15    3.82    0.48   5
  -9  -2  14   45.16    0.75   5
  -8  -4   8  122.18    0.78   5
  -8  -3   8    9.01    0.33   5
  -8  -1   9  571.20    1.75   5
  -7   0  17   15.05    0.52   5
  -7   2  11  193.84    1.19   5
  -7   2  12   25.54    0.62   5
  -7   2  13  136.76    1.12   5
  -6  -3  19   12.56    0.35   5
  -6   1  17    5.69    0.44   5
  -6   2   8  157.61    0.90   5
  -6   3  11  691.45    2.17   5
  -6   3  13   23.16    0.59   5
  -5   2   6  316.41    1.08   5
  -4   4   8    5.36    0.31   5
  -2   5   8    0.56    0.21   5
  -9  -5  13    7.55    0.43   5
  -9  -4  12    1.79    0.42   5
  -9  -4  14    1.05    0.44   5
  -8  -5  17    6.47    0.31   5
  -8  -4  17    1.26    0.35   5
  -8  -3  17   25.29    0.57   5
  -8  -1  16   14.12    0.56   5
  -8   0  12   40.93    0.74   5
  -7  -5  18    7.65    0.33   5
  -7  -2  18    0.39    0.27   5
  -7  -2  18    0.03    0.16   5
  -7  -1   7    1.24    0.26   5
  -7   1   9    1.61    0.34   5
  -7   1  15   23.03    0.69   5
  -5  -2  19    9.40    0.33   5
  -4   4  13    3.42    0.45   5
  -3   1  18    5.24    0.25   5
  -2   5   9  133.58    0.86   5
  -8  -2   9   10.52    0.40   5
  -8  -2  16   41.58    0.73   5
  -8  -1  10    2.23    0.38   5
  -8  -1  15   13.76    0.61   5
  -7  -4  18   12.99    0.42   5
  -7  -3  18    2.22    0.33   5
  -7  -1  17    0.90    0.43   5
  -6  -1  18    0.42    0.34   5
  -6   1   7   12.19    0.33   5
  -4   3  15   28.11    0.66   5
  -4   4   9    7.59    0.36   5
  -4   4  12   54.58    0.74   5
  -3   4   7  491.49    1.41   5
  -8  -5   9  126.05    0.82   5
  -8  -5  16    5.64    0.43   5
  -8  -4   9    0.30    0.35   5
  -8  -3   9   14.42    0.41   5
  -8  -3  16    1.34    0.44   5
  -8  -1  11   78.80    0.84   5
  -7  -2   7  363.31    1.20   5
  -7   1  10  302.74    1.38   5
  -6   1  16    0.82    0.44   5
  -6   2   9   67.64    0.67   5
  -5  -3  19    0.50    0.16   5
  -4   0  18   27.45    0.53   5
  -8  -7  14    9.56    0.40   5
  -8  -6  15    6.96    0.45   5
  -8  -2  10   13.20    0.44   5
  -8  -2  15  120.84    1.09   5
  -8  -1  12   15.65    0.56   5
  -8  -1  13   92.56    0.95   5
  -7  -6  17   12.20    0.40   5
  -7   0  15    6.77    0.60   5
  -7   1  11  109.08    0.92   5
  -7   1  13   12.25    0.54   5
  -6   2  10  109.17    0.86   5
  -6   2  13    8.04    0.56   5
  -5  -1  18   18.64    0.50   5
  -5   2   7  651.42    1.62   5
  -5   3  10    4.16    0.36   5
  -5   3  12    7.75    0.53   5
  -4   1  17    2.21    0.39   5
  -4   2  16   36.12    0.69   5
  -3   3  15    0.77    0.44   5
  -3   4  13  132.82    1.01   5
  -8  -5  10   16.07    0.46   5
  -8  -5  15    6.12    0.51   5
  -8  -4  15    4.22    0.52   5
  -8  -3  10   11.08    0.49   5
  -8  -3  15   22.38    0.61   5
  -8  -2  11    0.98    0.40   5
  -7  -5  17    4.44    0.35   5
  -7  -4  17    2.02    0.40   5
  -7  -3   7   43.94    0.46   5
  -7  -3  17    1.51    0.38   5
  -7  -1   8   78.32    0.65   5
  -7  -1  16  139.22    1.18   5
  -6  -5  18    2.79    0.26   5
  -6  -4  18   29.87    0.56   5
  -6  -3  18    7.47    0.38   5
  -6  -1   6  184.67    0.82   5
  -6  -1  17    5.73    0.51   5
  -6   1  15    6.90    0.52   5
  -6   2  11   32.49    0.59   5
  -6   2  12   34.36    0.64   5
  -5   3  11   11.66    0.45   5
  -2   0  18    1.19    0.21   5
  -2   4  13   10.51    0.46   5
  -8  -6  11   18.12    0.45   5
  -8  -6  13   -0.01    0.45   5
  -8  -3  14    5.69    0.49   5
  -8  -2  13   15.24    0.57   5
  -7  -4   7  417.24    1.23   5
  -6  -7  17    5.80    0.30   5
  -6   0  16  221.42    1.41   5
  -5  -2  18    8.69    0.43   5
  -5   0  17   13.75    0.51   5
  -4  -1  18    7.58    0.39   5
  -3   1  17   45.05    0.63   5
  -3   2  16    1.10    0.37   5
  -3   4  11   93.16    0.84   5
  -2   3  15   49.94    0.66   5
  -8  -5  11    7.26    0.40   5
  -8  -5  12    4.50    0.47   5
  -8  -4  11  165.51    1.07   5
  -8  -4  14   22.22    0.59   5
  -8  -3  12  463.49    1.82   5
  -8  -3  13   77.63    0.87   5
  -7  -6  16    1.12    0.38   5
  -7  -2   8  153.88    0.86   5
  -7  -1   9    1.47    0.36   5
  -7  -1  15   24.17    0.66   5
  -7   0  13  322.56    1.61   5
  -6   1   9  175.33    0.98   5
  -5   2   8  258.87    1.09   5
  -4   2  15   21.06    0.67   5
  -4   3   8    0.75    0.26   5
  -4   3  13  128.66    1.03   5
  -2   1  17    6.37    0.35   5
  -2   2  16    6.89    0.37   5
  -1   1  17    8.80    0.30   5
  -1   1  17    3.25    0.19   5
  -8  -4  12  434.12    1.74   5
  -7  -4  16    1.68    0.44   5
  -6  -8  16   11.97    0.31   5
  -6  -8  16    2.85    0.17   5
  -6  -6  17   18.98    0.47   5
  -6  -2   6    4.51    0.24   5
  -6  -1  16    0.62    0.53   5
  -5  -5  18   22.55    0.45   5
  -5  -4  18    5.30    0.32   5
  -5  -3  18   59.31    0.70   5
  -5   2  13   85.47    0.92   5
  -4  -2  18   19.13    0.48   5
  -4   3   9  226.86    1.10   5
  -4   3  12   -0.07    0.46   5
  -3  -1  18    3.87    0.26   5
  -2   4  12   13.75    0.43   5
  -7  -3   8  177.83    0.90   5
  -7  -1  10  311.82    1.35   5
  -7  -1  13   11.84    0.60   5
  -6  -5  17   21.57    0.51   5
  -6  -3  17   28.15    0.61   5
  -6   1  10   30.68    0.54   5
  -6   1  11   11.21    0.46   5
  -5   1  15    1.43    0.46   5
  -5   2   9   77.04    0.67   5
  -5   2  12   14.51    0.57   5
  -4   3  10   12.69    0.42   5
  -2   4  11   73.05    0.74   5
  -7  -7  14   24.26    0.51   5
  -7  -5   8    5.08    0.27   5
  -7  -5  15   51.65    0.77   5
  -7  -4  15    6.06    0.57   5
  -7  -2   9  180.01    0.98   5
  -7  -1  11  109.32    0.90   5
  -6  -7  16   30.30    0.54   5
  -6  -2  16   17.50    0.64   5
  -6  -1   7   12.15    0.31   5
  -5  -7  17    0.54    0.23   5
  -5   2  10    1.85    0.34   5
  -5   2  11  151.62    1.03   5
  -4  -4  18   22.65    0.47   5
  -3   0  17    2.49    0.34   5
  -3   1  16   26.50    0.64   5
  -3   3  13   61.99    0.75   5
  -2   4   9   92.87    0.73   5
  -2   4  10   62.51    0.67   5
  -1   3  14    3.93    0.41   5
  -7  -7  13   17.69    0.54   5
  -7  -3   9  169.62    0.97   5
  -7  -2  10    0.92    0.34   5
  -7  -2  13  136.04    1.14   5
  -6  -8  15   24.58    0.46   5
  -6  -1  15    6.71    0.54   5
  -5   1  14  118.56    1.06   5
  -4   2   7  136.94    0.74   5
  -3  -3  18   16.56    0.44   5
  -3   3   7  535.75    1.41   5
  -2  -2  18    7.33    0.29   5
  -2   2  15    3.30    0.45   5
  -1   0  17    8.28    0.34   5
  -7  -5   9    0.03    0.35   5
  -7  -5  14   11.87    0.55   5
  -7  -4   9    4.04    0.38   5
  -7  -4  14    1.15    0.51   5
  -7  -2  11  191.89    1.15   5
  -7  -2  12   26.01    0.60   5
  -6  -6  16   10.26    0.42   5
  -6  -4  16   47.93    0.77   5
  -6   0  10  176.43    1.06   5
  -5  -8  16    0.21    0.21   5
  -5  -4  17   39.01    0.67   5
  -5  -3  17    4.98    0.43   5
  -5  -1  16   79.38    0.92   5
  -5   0  15   26.37    0.64   5
  -5   1   8  485.40    1.45   5
  -4   2  13  118.73    1.00   5
  -3  -5  18    0.72    0.17   5
  -3  -4  18    1.55    0.23   5
  -3   3  12   39.92    0.62   5
  -2  -3  18    0.91    0.25   5
  -2   1  16    7.13    0.43   5
  -2   3  13   37.73    0.66   5
  -1   2  15   33.12    0.63   5
  -1   4  11   28.19    0.48   5
  -7  -6  10   38.24    0.57   5
  -7  -3  11   38.11    0.65   5
  -7  -3  12  152.99    1.14   5
  -7  -3  13  195.19    1.28   5
  -6  -8  14    9.94    0.42   5
  -6  -2   7   95.76    0.62   5
  -6  -2  15   70.49    0.90   5
  -6  -1   8    2.83    0.27   5
  -5   1  13   48.34    0.73   5
  -4  -7  17    8.68    0.34   5
  -4  -2  17   10.90    0.47   5
  -3  -1  17   51.78    0.71   5
  -3   3   8   11.63    0.31   5
  -3   3  11    4.23    0.38   5
  -1   4  10   10.14    0.38   5
  -7  -6  11    4.57    0.39   5
  -7  -6  12   23.63    0.54   5
  -7  -5  10  200.51    1.07   5
  -7  -5  11    8.58    0.48   5
  -7  -4  12   24.87    0.57   5
  -6  -3  15  144.81    1.19   5
  -5  -7  16   11.03    0.41   5
  -5  -2  16   48.85    0.79   5
  -5   1   9   24.42    0.44   5
  -5   1  11   30.11    0.61   5
  -5   1  12  231.14    1.30   5
  -4  -3  17   68.14    0.83   5
  -4   2  12  100.49    0.90   5
  -3   1  15   14.67    0.52   5
  -3   3  10  287.29    1.26   5
  -2  -1  17    6.08    0.36   5
  -1  -1  17   12.00    0.42   5
  -6  -8  13   12.92    0.49   5
  -6  -6  15   18.11    0.52   5
  -6  -5  15   13.60    0.55   5
  -6  -4  15   17.96    0.58   5
  -6  -3   7 1335.21    2.19   5
  -6  -1   9  173.86    0.95   5
  -5  -3  16   18.58    0.61   5
  -5   0   7   81.61    0.58   5
  -5   1  10   39.77    0.56   5
  -4  -6  17    0.18    0.23   5
  -4  -6  17   -0.03    0.14   5
  -4  -5  17   32.99    0.60   5
  -4  -4  17    7.24    0.42   5
  -4   2  11   20.51    0.49   5
  -3  -2  17   17.76    0.51   5
  -2   0  16    2.90    0.43   5
  -2   3  12   67.11    0.72   5
  -6  -4   7  146.34    0.76   5
  -6  -1  10   29.42    0.52   5
  -6  -1  11   11.21    0.45   5
  -5  -8  15   16.31    0.40   5
  -5  -6  16   11.89    0.46   5
  -5   0  13  295.76    1.53   5
  -4  -8  16    1.61    0.21   5
  -4   1  13  103.03    0.98   5
  -3  -7  17    2.35    0.21   5
  -3  -3  17    0.63    0.39   5
  -2  -2  17    0.19    0.32   5
  -1   2  14   45.76    0.70   5
  -6  -8  12    3.77    0.37   5
  -6  -6  14    2.88    0.43   5
  -6  -5   7   60.93    0.49   5
  -6  -5  14    0.83    0.49   5
  -6  -4  14  202.28    1.35   5
  -6  -2  13    8.34    0.51   5
  -5  -2  15  133.45    1.17   5
  -4  -2  16   34.44    0.71   5
  -3  -6  17    5.05    0.32   5
  -3  -5  17   -0.11    0.29   5
  -3   2  12    7.67    0.53   5
  -2   3  11  249.85    1.24   5
  -1  -2  17    3.28    0.30   5
  -1   1  15    9.17    0.51   5
  -1   3  12   16.97    0.50   5
   0   0  16    3.83    0.30   5
   0   0  16    1.91    0.20   5
  -6  -7  13  218.60    1.27   5
  -6  -3   8   70.13    0.59   5
  -6  -3  13   24.26    0.62   5
  -6  -2  10  107.07    0.83   5
  -6  -2  11   30.98    0.58   5
  -6  -2  12   34.39    0.64   5
  -5  -3  15    2.11    0.52   5
  -5   0   9  737.81    1.88   5
  -4  -7  16    6.78    0.32   5
  -4  -3  16    2.45    0.48   5
  -4  -1  15   58.66    0.83   5
  -4   1  12    2.30    0.40   5
  -3  -8  16   12.60    0.39   5
  -2  -6  17    1.61    0.26   5
  -2  -3  17   34.64    0.59   5
  -2   2  13    6.49    0.45   5
  -2   3   8    1.09    0.26   5
  -2   3   9  107.37    0.76   5
  -2   3  10  129.77    0.86   5
   0   1  15    8.87    0.40   5
  -6  -6  13  106.17    0.97   5
  -6  -5   8    4.52    0.32   5
  -6  -4  13   39.63    0.70   5
  -6  -3   9   45.54    0.59   5
  -6  -3  12   35.29    0.69   5
  -5  -8  14   13.98    0.45   5
  -5  -6  15   13.51    0.49   5
  -5  -5  15   59.38    0.85   5
  -5  -4  15   53.94    0.83   5
  -5  -1   7  161.72    0.78   5
  -5  -1  13   51.74    0.76   5
  -4  -5  16    4.06    0.46   5
  -4   1   8  644.95    1.64   5
  -3  -2  16    0.99    0.45   5
  -2  -5  17   27.56    0.49   5
  -2  -4  17    2.07    0.27   5
  -2  -1  16    6.93    0.46   5
  -1  -3  17    0.16    0.23   5
  -1  -3  17    0.40    0.15   5
   0   3  12    2.30    0.32   5
  -6  -7  10   16.98    0.43   5
  -6  -7  11    3.13    0.40   5
  -6  -6   9    2.19    0.34   5
  -6  -6  12  190.48    1.22   5
  -6  -4  12  190.77    1.24   5
  -6  -3  10   33.66    0.53   5
  -6  -3  11  752.09    2.18   5
  -4  -8  15   10.12    0.39   5
  -4  -2  15   21.15    0.63   5
  -3  -7  16   25.72    0.54   5
  -3   1  13   51.17    0.72   5
  -3   2   8  332.09    1.16   5
  -3   2   9  182.61    0.97   5
  -3   2  10   69.86    0.67   5
  -1  -4  17    8.68    0.33   5
  -1   2  13   67.25    0.80   5
  -1   3  11    2.15    0.33   5
   0  -4  17    0.11    0.17   5
   0  -4  17    0.08    0.11   5
   0  -1  16   15.83    0.46   5
   1  -1  16    1.12    0.22   5
  -6  -6  10   15.48    0.48   5
  -6  -5   9   68.06    0.64   5
  -6  -5  11   55.05    0.74   5
  -6  -5  12    8.45    0.51   5
  -6  -4   9   88.76    0.71   5
  -6  -4  10   76.31    0.76   5
  -6  -4  11   31.86    0.58   5
  -5  -8  13  112.43    0.95   5
  -5  -1   8  509.63    1.46   5
  -5  -1  12  246.23    1.35   5
  -3  -3  16   17.21    0.57   5
  -3  -1  15   15.48    0.58   5
  -2  -8  16    0.32    0.17   5
  -2  -2  16    6.99    0.45   5
  -2   2  12   16.85    0.51   5
  -1   0  15    7.48    0.55   5
  -1   3  10    7.80    0.38   5
   2  -2  16    7.73    0.31   5
  -6  -5  10   34.82    0.55   5
  -5  -6  14    4.77    0.47   5
  -5  -5  14   72.22    0.88   5
  -5  -4  14   20.09    0.61   5
  -5  -2   7  692.81    1.58   5
  -5  -1   9   23.97    0.43   5
  -5  -1  10   38.76    0.56   5
  -5  -1  11   29.81    0.56   5
  -4  -7  15   46.28    0.68   5
  -4  -3  15   28.90    0.69   5
  -4   0  12  300.50    1.46   5
  -3  -6  16    2.74    0.37   5
  -3  -5  16   43.05    0.69   5
  -3  -4  16    1.92    0.42   5
  -3   1  12  106.32    0.92   5
  -1  -2  16   11.43    0.47   5
   0   1  14    6.33    0.48   5
   1  -2  16    1.37    0.31   5
   1   0  15   11.93    0.42   5
  -5  -8  12   42.01    0.66   5
  -5  -3  13   29.91    0.65   5
  -5  -2  12   14.69    0.53   5
  -4  -9  13   28.03    0.56   5
  -4  -5  15    6.11    0.48   5
  -4  -4  15   47.41    0.80   5
  -4  -1  13  109.53    1.00   5
  -2  -9  15    0.87    0.24   5
  -2  -7  16    2.23    0.26   5
  -2  -3  16    2.48    0.44   5
  -2   2  11   40.39    0.59   5
  -1   2  12   79.46    0.83   5
  -1   3   8  199.73    0.92   5
  -1   3   9   23.99    0.40   5
   0  -2  16    5.60    0.37   5
   1   1  14   14.28    0.47   5
   2  -3  16    2.58    0.25   5
  -5  -5   6  306.94    0.98   5
  -5  -4  13    3.90    0.49   5
  -5  -2   8  280.52    1.09   5
  -5  -2  11  150.54    1.03   5
  -3   1  11   25.21    0.51   5
  -2 -10  14   17.97    0.37   5
  -2  -6  16   77.28    0.81   5
  -2  -5  16    7.40    0.43   5
  -2  -4  16    5.65    0.45   5
  -2   2  10    4.72    0.39   5
  -1  -3  16    1.60    0.37   5
  -1  -1  15    9.66    0.55   5
   0   3  10   39.55    0.54   5
  -5  -3   7    2.10    0.22   5
  -5  -3  12    7.66    0.48   5
  -5  -2   9   79.51    0.67   5
  -5  -2  10    1.48    0.34   5
  -4  -7  14    0.76    0.37   5
  -4  -1  12    2.03    0.43   5
  -4   0   8  407.68    1.30   5
  -4   0  10    6.19    0.36   5
  -3  -7  15    3.26    0.39   5
  -3  -3  15    1.05    0.47   5
  -2  -2  15    3.98    0.50   5
  -1  -6  16    0.50    0.28   5
  -1  -5  16   24.76    0.56   5
  -1  -4  16    4.85    0.40   5
  -1   1  13   27.79    0.61   5
   0  -7  16    0.46    0.18   5
   0  -7  16    0.09    0.10   5
   0  -3  16    8.18    0.41   5
   0  -1  15    8.21    0.49   5
   0   2  12  161.54    1.08   5
   2  -4  16    9.24    0.29   5
   2  -1  15    2.48    0.31   5
  -5  -7  11    1.25    0.42   5
  -5  -6  12    2.70    0.45   5
  -5  -5  12   56.62    0.79   5
  -5  -4  12  143.31    1.09   5
  -5  -3  11   11.62    0.47   5
  -4  -9  12   76.43    0.77   5
  -4  -8  13   24.01    0.57   5
  -4  -6  14   16.39    0.56   5
  -4  -5  14   30.47    0.67   5
  -4  -4  14   57.65    0.83   5
  -4  -2  13  125.81    1.08   5
  -3  -5  15    1.52    0.47   5
  -3  -4  15   29.27    0.70   5
  -3   1   8   13.62    0.33   5
  -3   1   9   85.66    0.68   5
  -2  -8  15    4.93    0.33   5
  -2   2   8  177.90    0.86   5
  -2   2   9   33.25    0.46   5
  -1   2  11  159.45    1.02   5
   0  -6  16    4.34    0.27   5
   0  -5  16    9.74    0.40   5
   0  -4  16   14.91    0.43   5
   1  -5  16   19.07    0.47   5
   1  -4  16    7.54    0.31   5
   1  -4  16    4.95    0.23   5
   1  -1  15    0.89    0.37   5
   3  -2  15   24.02    0.47   5
  -5  -7  10    4.75    0.44   5
  -5  -5   7   13.29    0.33   5
  -5  -4  11  355.34    1.57   5
  -5  -3   8  144.26    0.81   5
  -5  -3   9  220.02    1.06   5
  -5  -3  10    3.73    0.36   5
  -4  -3  13  122.03    1.10   5
  -3  -8  14   41.61    0.63   5
  -2  -9  14    2.47    0.34   5
  -2  -7  15   22.61    0.57   5
  -2  -3  15   50.37    0.79   5
  -1  -8  15    6.47    0.37   5
  -1  -2  15   35.35    0.68   5
   0   1  13   29.51    0.59   5
   0   3   9  540.95    1.56   5
   2   0  14    2.58    0.38   5
  -5  -6   8   27.32    0.46   5
  -5  -6  10   29.81    0.58   5
  -5  -6  11    7.43    0.44   5
  -5  -5  11   -0.00    0.41   5
  -5  -4   8   74.06    0.61   5
  -4  -9  11   79.47    0.78   5
  -4  -7  13   23.38    0.59   5
  -4  -2  12  109.15    0.96   5
  -4  -1   7   25.73    0.35   5
  -4  -1  10   47.29    0.60   5
  -3  -7  14    2.05    0.48   5
  -3   0  11   93.72    0.85   5
  -2  -6  15   66.26    0.83   5
  -2  -5  15   30.89    0.70   5
  -2  -4  15    0.53    0.48   5
  -1   1  12  154.42    1.11   5
   0  -2  15    3.72    0.44   5
   1  -2  15    5.03    0.43   5
   2  -2  15    0.24    0.30   5
  -5  -6   9   88.29    0.73   5
  -5  -5   8   55.31    0.54   5
  -5  -5   9   44.72    0.56   5
  -5  -5  10  146.97    0.98   5
  -5  -4   9  156.30    0.92   5
  -4  -6  13    0.01    0.43   5
  -4  -1   8  684.02    1.67   5
  -4  -1   9   34.80    0.49   5
  -3  -6  14   -0.32    0.51   5
  -3  -4  14    4.03    0.51   5
  -3  -2  13   70.26    0.88   5
  -1  -7  15    1.53    0.34   5
  -1  -3  15    6.53    0.50   5
  -1  -1  14   24.49    0.61   5
  -1   0  13    4.05    0.50   5
   0  -8  15   -0.17    0.20   5
   0  -8  15    0.17    0.13   5
   0   2  11    0.68    0.31   5
   1  -8  15    0.63    0.23   5
  -4  -3  12   -0.09    0.44   5
  -3  -8  13   23.10    0.63   5
  -3  -5  14   14.71    0.61   5
  -2  -8  14    9.93    0.44   5
  -2  -1  13   19.69    0.59   5
  -2   1  10  245.50    1.16   5
  -1  -9  14   30.13    0.52   5
  -1  -6  15   30.47    0.62   5
  -1  -4  15   12.93    0.55   5
   0  -7  15   16.56    0.47   5
   0  -3  15    2.07    0.45   5
   0  -1  14    4.90    0.44   5
   1  -3  15    0.32    0.42   5
   3  -1  14   15.53    0.47   5
  -4  -6  12  142.91    1.14   5
  -4  -5  12  144.83    1.15   5
  -4  -4  12   57.90    0.79   5
  -4  -2  10   67.92    0.69   5
  -3  -3  13   62.20    0.84   5
  -3   0   9   94.24    0.70   5
  -2  -9  13   24.85    0.57   5
  -2  -3  14    5.18    0.52   5
  -1  -2  14   46.93    0.78   5
   0  -6  15   14.11    0.51   5
   0  -5  15   70.18    0.87   5
   0  -4  15   -0.34    0.41   5
   1  -7  15    6.97    0.34   5
   1  -4  15  101.87    0.97   5
   1   2  11  318.23    1.39   5
   2  -7  15    7.90    0.28   5
   2  -1  14    2.47    0.40   5
   4  -2  14    1.58    0.28   5
  -4  -8  10    3.56    0.46   5
  -4  -7  11   30.47    0.64   5
  -4  -3  11  285.16    1.39   5
  -4  -2   7  144.98    0.73   5
  -4  -2   8  348.61    1.23   5
  -4  -2   9  122.91    0.81   5
  -3  -7  13   71.36    0.86   5
  -3  -1  11   28.29    0.56   5
  -2  -5  14   23.40    0.70   5
  -2  -4  14   21.62    0.65   5
  -2   1   9   21.81    0.41   5
  -1  -8  14   17.39    0.53   5
  -1   1  11    8.94    0.42   5
  -1   2   8   13.33    0.31   5
   1  -9  14    9.61    0.38   5
   1  -6  15  145.30    1.05   5
   1  -5  15   20.79    0.52   5
   1   1  12   97.46    0.92   5
   2  -6  15    2.22    0.24   5
   2  -6  15    0.71    0.15   5
   2  -5  15   31.90    0.53   5
   2   2  11    1.40    0.31   5
   3   0  13   22.10    0.57   5
  -4  -8   9   11.08    0.43   5
  -4  -6  11   88.57    0.93   5
  -4  -3  10   12.50    0.43   5
  -3  -9  11   36.07    0.63   5
  -3  -8  12    1.30    0.52   5
  -3  -6  13   45.34    0.76   5
  -2  -2  13    6.68    0.51   5
  -2  -1  12    1.48    0.43   5
  -2   1   8  267.95    1.04   5
  -1  -3  14    3.67    0.50   5
  -1  -1  13   26.00    0.62   5
   3  -2  14    6.01    0.39   5
  -4  -7  10   94.36    0.87   5
  -4  -5  11  149.30    1.08   5
  -3  -3  12   35.17    0.66   5
  -3  -1  10   23.05    0.47   5
  -2  -8  13   19.79    0.55   5
  -2  -3  13   40.24    0.79   5
  -1  -9  13   -0.18    0.35   5
  -1   1  10  117.16    0.87   5
   0  -8  14   78.17    0.83   5
   0   1  11  362.86    1.56   5
   1  -2  14    0.39    0.43   5
   1   2  10    4.36    0.39   5
   2  -2  14   64.56    0.78   5
   4  -3  14    1.45    0.23   5
  -4  -7   9   29.74    0.56   5
  -4  -5  10    1.38    0.44   5
  -4  -4  10   93.47    0.81   5
  -4  -3   7  435.93    1.26   5
  -3  -4  12  140.74    1.15   5
  -3  -2  11  144.62    1.03   5
  -3  -1   9  105.22    0.75   5
  -2 -10  11   15.08    0.45   5
  -2  -9  12    3.80    0.42   5
  -2   0  10   22.30    0.46   5
  -1 -10  12   43.35    0.65   5
  -1  -6  14   10.48    0.55   5
  -1  -2  13   67.55    0.87   5
   0  -7  14    1.81    0.45   5
   0  -3  14   -0.18    0.44   5
   1 -10  13    0.75    0.20   5
   2  -8  14    2.99    0.28   5
   3  -3  14    6.82    0.42   5
   4  -1  13    3.43    0.33   5
  -4  -7   8    4.92    0.34   5
  -4  -6   9    3.12    0.40   5
  -4  -5   6   40.09    0.42   5
  -4  -4   7   46.96    0.48   5
  -4  -4   9    7.75    0.36   5
  -3  -6  12   61.66    0.82   5
  -3  -5  12   14.08    0.56   5
  -3  -1   8   12.35    0.32   5
  -2  -6  13    6.84    0.54   5
  -2  -2  12   16.91    0.56   5
  -2  -1  11  101.30    0.88   5
  -1   0  11  197.21    1.17   5
   0  -9  13    6.45    0.42   5
   0  -6  14   83.45    0.94   5
   0  -5  14    0.89    0.52   5
   1  -7  14   25.69    0.60   5
   1  -3  14   19.70    0.59   5
   1   1  11    3.59    0.42   5
   2  -3  14   19.09    0.55   5
   2  -1  13    3.84    0.56   5
   2   2  10   87.14    0.77   5
   3  -7  14    5.41    0.34   5
   3  -1  13   45.05    0.68   5
   4  -6  14   16.48    0.38   5
   4  -6  14    5.39    0.25   5
   4  -5  14    0.38    0.22   5
   5  -2  13    1.21    0.26   5
  -4  -5   8  222.85    1.05   5
  -4  -5   9  313.19    1.31   5
  -4  -4   8    5.37    0.30   5
  -3  -2  10   65.57    0.69   5
  -2  -8  12  337.43    1.69   5
  -1  -8  13    6.47    0.46   5
  -1   1   9  336.03    1.26   5
   0   2   8    3.71    0.23   5
   1  -5  14   57.76    0.84   5
   2  -7  14    0.49    0.25   5
   2  -7  14    0.06    0.15   5
   3  -6  14    1.18    0.29   5
   4   0  12   17.32    0.51   5
   6  -4  13    0.38    0.18   5
  -3  -8  10   46.88    0.71   5
  -2  -9  11  183.65    1.23   5
  -2  -3  12   65.27    0.83   5
  -1  -9  12  201.18    1.32   5
  -1  -7  13   -0.01    0.44   5
   0 -11  11   14.14    0.41   5
   0   1  10    0.25    0.32   5
   1  -9  13    2.26    0.33   5
   1  -2  13   58.92    0.86   5
   1   2   9  166.33    0.91   5
   2  -9  13   10.28    0.43   5
   2   1  11  209.18    1.19   5
   3  -9  13    2.63    0.28   5
   3   1  11    2.29    0.43   5
   4  -2  13    1.88    0.36   5
   5  -3  13    5.27    0.35   5
  -3  -6  11   68.40    0.81   5
  -3  -5  11   89.83    0.90   5
  -3  -3  10  282.77    1.33   5
  -3  -2   9  182.80    0.98   5
  -2  -7  12   57.99    0.81   5
  -2  -4  12   13.62    0.56   5
  -2  -2  11   36.11    0.62   5
  -2   0   8   58.41    0.53   5
  -1  -2  12   95.28    0.95   5
   0  -8  13    1.78    0.42   5
   0  -1  12   50.41    0.73   5
   2  -2  13  106.98    1.02   5
   5  -1  12    6.03    0.42   5
  -3  -8   9   26.25    0.57   5
  -3  -4  10    6.27    0.46   5
  -3  -2   8  297.75    1.14   5
  -2  -5  12    1.96    0.52   5
  -1  -1  11    9.09    0.45   5
   1 -11  11    0.51    0.31   5
   1 -10  12    3.36    0.32   5
   1  -8  13   11.73    0.48   5
   1  -3  13    1.86    0.56   5
   1  -1  12   92.10    0.96   5
   1   1  10  113.37    0.89   5
   2   2   9  119.48    0.83   5
   4  -8  13    0.19    0.15   5
   4  -8  13    0.00    0.09   5
   4  -3  13    5.21    0.44   5
   5  -6  13    7.13    0.35   5
   5  -4  13   11.26    0.38   5
   6  -2  12   41.29    0.60   5
  -3  -5  10   59.86    0.72   5
  -3  -3   9    3.36    0.32   5
  -3  -2   7   15.86    0.31   5
  -1  -8  12    2.97    0.46   5
  -1  -3  12   18.68    0.59   5
   0  -6  13   18.52    0.62   5
   0  -5  13   55.28    0.85   5
   0  -2  12  164.72    1.25   5
   0   1   9  114.75    0.78   5
   1   2   8  246.90    1.03   5
   2  -3  13  211.33    1.41   5
   4  -1  12   21.61    0.54   5
   7  -4  12    0.75    0.19   5
  -3  -8   8   54.45    0.61   5
  -3  -7   9   50.40    0.68   5
  -2  -7  11   32.50    0.66   5
  -2  -2  10    4.98    0.38   5
  -1  -9  11    2.84    0.46   5
  -1  -7  12   84.38    0.96   5
  -1  -4  12   11.19    0.56   5
  -1   0   9  376.64    1.36   5
   0 -10  11    3.17    0.40   5
   1  -6  13    6.02    0.53   5
   1  -5  13    0.92    0.48   5
   1  -4  13  456.97    2.04   5
   2 -11  11    4.37    0.28   5
   2  -7  13    3.43    0.43   5
   2   1  10    4.61    0.41   5
   3  -4  13    6.68    0.54   5
   4  -4  13    1.34    0.36   5
   7  -5  12    8.41    0.28   5
  -3  -5   9  100.99    0.82   5
  -3  -4   9  251.34    1.19   5
  -3  -3   8   13.51    0.34   5
  -2  -8  10   46.76    0.74   5
  -2  -6  11   29.20    0.64   5
  -2  -5  11   46.54    0.74   5
  -1  -5  12  144.70    1.19   5
  -1  -2  11  168.81    1.14   5
  -1  -1  10  110.77    0.86   5
   0  -8  12   16.20    0.58   5
   0  -3  12    2.74    0.55   5
   0   0  10  272.87    1.29   5
   1  -9  12    7.12    0.44   5
   1  -2  12    2.14    0.46   5
   2  -6  13   -0.26    0.41   5
   3  -6  13   49.69    0.72   5
   3   0  11  183.39    1.21   5
   3   1  10  157.63    1.06   5
   4   1  10    0.86    0.38   5
   5  -2  12   35.95    0.60   5
   6  -3  12    2.00    0.26   5
  -3  -7   8  669.73    1.89   5
  -3  -4   8  261.22    1.13   5
  -3  -3   7  549.20    1.45   5
  -2  -3  10  134.59    0.98   5
  -2  -2   9   32.68    0.54   5
  -1  -8  11  374.56    1.81   5
   0  -7  12   29.01    0.72   5
   0   1   8  825.86    1.85   5
   1 -10  11    1.46    0.38   5
   2  -9  12    2.17    0.38   5
   3  -2  12   -0.10    0.51   5
   5  -8  12    0.49    0.24   5
   6  -7  12    1.29    0.22   5
  -3  -7   7  102.57    0.73   5
  -3  -5   8  220.87    1.07   5
  -3  -4   7  560.13    1.51   5
  -2  -7  10   27.31    0.61   5
  -2  -4  10   64.84    0.79   5
   0 -11   9   28.35    0.57   5
   0  -6  12  177.07    1.33   5
   0  -4  12   23.44    0.65   5
   1  -8  12    1.61    0.46   5
   6  -6  12   15.24    0.41   5
   6  -5  12    0.13    0.26   5
  -3  -5   7    0.72    0.29   5
  -2  -9   8    0.16    0.32   5
  -2  -6  10    9.55    0.48   5
  -1  -6  11   19.19    0.66   5
  -1  -4  11   30.35    0.65   5
   0 -10  10   82.81    0.86   5
   0  -2  11    0.59    0.42   5
   1  -7  12    2.50    0.48   5
   2 -11  10    0.28    0.35   5
   2 -10  11    2.27    0.35   5
   2  -1  11  207.31    1.32   5
   3  -8  12    7.40    0.45   5
   3  -3  12   63.49    0.89   5
   4  -3  12   39.15    0.69   5
   5  -7  12    9.79    0.40   5
   5  -4  12    2.63    0.42   5
   5  -1  11   10.65    0.45   5
  -3  -6   6    3.49    0.23   5
  -3  -5   6  152.30    0.76   5
  -2  -3   9  123.38    0.87   5
  -1  -5  11   17.47    0.58   5
   0  -8  11    0.19    0.43   5
   1  -9  11    3.25    0.45   5
   1  -6  12    1.49    0.50   5
   2  -4  12  133.49    1.22   5
   3  -1  11    2.68    0.45   5
   4 -12   9    0.11    0.24   5
   4  -7  12    0.22    0.37   5
   4  -4  12  125.37    1.13   5
   5  -6  12    0.47    0.37   5
   5  -5  12    7.35    0.43   5
   6  -2  11    5.71    0.39   5
   7  -3  11    0.46    0.28   5
  -2  -7   9   80.16    0.82   5
  -2  -4   9   91.92    0.79   5
  -1 -10   8    5.18    0.38   5
  -1  -8  10  282.23    1.54   5
  -1  -3  10    8.00    0.45   5
   1 -10  10    1.28    0.51   5
   1  -2  11  320.35    1.60   5
   2  -9  11   10.16    0.56   5
   2   2   7    0.27    0.20   5
   3  -5  12   38.20    0.78   5
   3  -4  12   33.19    0.71   5
   3   1   9    1.22    0.38   5
   5  -9  11    2.16    0.33   5
   7  -7  11    6.28    0.31   5
  -2  -8   8   68.76    0.70   5
  -2  -5   9  142.55    0.98   5
  -2  -3   8    0.90    0.27   5
  -1  -9   9   12.18    0.47   5
  -1  -7  10   37.62    0.73   5
  -1  -2   9  194.79    1.08   5
  -1  -1   8   17.93    0.37   5
   0 -10   9    2.25    0.47   5
   0  -9  10   59.84    0.81   5
   0  -6  11  172.51    1.33   5
   0  -4  11    1.42    0.46   5
   1  -1  10  115.50    0.94   5
   2  -2  11    1.70    0.44   5
   3  -9  11   11.60    0.51   5
   4   1   9  146.60    0.96   5
   5  -2  11    2.71    0.42   5
   6  -8  11    0.41    0.26   5
   6  -3  11   78.43    0.88   5
   7  -6  11   14.99    0.38   5
  -2  -7   8    7.27    0.44   5
  -1  -6  10    2.53    0.44   5
  -1  -5  10  177.55    1.20   5
   0  -2  10  127.43    0.99   5
   0   0   8 1248.16    2.33   5
   1  -3  11  219.95    1.38   5
   1   0   9   32.72    0.53   5
   3  -2  11    6.71    0.49   5
   5  -8  11   24.56    0.59   5
   6  -7  11    2.43    0.36   5
   6  -1  10    8.93    0.51   5
   8  -3  10    0.22    0.30   5
  -2  -8   7   23.69    0.45   5
  -2  -6   8  252.09    1.25   5
  -1  -9   8   75.58    0.80   5
  -1  -8   9  125.08    1.03   5
   1  -4  11   20.29    0.63   5
   2  -8  11   12.78    0.55   5
   2  -3  11    3.19    0.50   5
   3  -8  11    4.65    0.56   5
   4  -8  11   20.92    0.63   5
   5 -10  10    3.50    0.35   5
   5  -3  11    0.84    0.40   5
   6  -6  11    1.83    0.42   5
   6  -5  11   28.48    0.63   5
   7  -2  10    1.86    0.37   5
  -2  -5   8    0.67    0.32   5
  -1  -3   9   21.74    0.49   5
  -1  -1   7  314.44    1.11   5
   0  -3  10   43.14    0.67   5
   1 -11   8   72.00    0.80   5
   1 -10   9   28.23    0.69   5
   1  -2  10    4.15    0.44   5
   1   1   7    1.34    0.20   5
   2  -7  11   80.17    0.98   5
   4  -3  11   17.51    0.58   5
   4  -1  10    0.83    0.48   5
   5 -12   8    0.87    0.28   5
   5 -11   9    0.08    0.28   5
   5  -4  11  157.76    1.25   5
   8  -5  10    6.86    0.36   5
  -2  -7   7  116.28    0.81   5
  -2  -4   7    5.51    0.32   5
  -1  -7   9    0.33    0.43   5
  -1  -4   9  579.21    1.91   5
  -1  -2   8   13.55    0.36   5
   0  -6  10   29.59    0.72   5
   0  -5  10   11.52    0.60   5
   0  -2   9    1.62    0.39   5
   2  -9  10   28.30    0.68   5
   2  -6  11   45.87    0.84   5
   3  -7  11   -0.05    0.48   5
   3   1   8  293.16    1.25   5
   4  -4  11    7.82    0.53   5
   5  -5  11    0.15    0.42   5
   6  -9  10    2.52    0.27   5
   6  -2  10   68.12    0.85   5
   7  -8  10    0.28    0.24   5
   7  -8  10    0.28    0.14   5
   7  -3  10    9.43    0.50   5
   9  -3   9    0.28    0.30   5
  -2  -6   7    7.52    0.33   5
  -2  -5   7  153.87    0.87   5
  -1  -9   7    6.01    0.43   5
  -1  -8   8   19.50    0.51   5
  -1  -6   9    4.19    0.42   5
  -1  -5   9   90.23    0.85   5
   1  -8  10   10.38    0.55   5
   2 -10   9    4.64    0.55   5
   4  -5  11  100.54    1.07   5
   4   1   8    1.24    0.33   5
   5  -9  10   27.67    0.60   5
   5   0   9   67.17    0.75   5
   7  -7  10   19.13    0.52   5
   8  -9   9    0.18    0.15   5
  -2  -7   6   22.95    0.39   5
  -1  -3   8  216.96    1.08   5
   1 -11   7   11.93    0.51   5
   1  -4  10    1.10    0.54   5
   2 -11   8    3.40    0.40   5
   2  -8  10   76.49    1.00   5
   3  -2  10    0.51    0.42   5
   4  -2  10   90.83    1.02   5
   6 -10   9    1.14    0.36   5
   6  -8  10   27.20    0.59   5
   7  -6  10    7.04    0.47   5
   7  -5  10   16.60    0.55   5
   7  -4  10    0.97    0.36   5
   8  -2   9    3.18    0.37   5
   9  -5   9   -0.22    0.29   5
   9  -4   9    5.89    0.34   5
  -2  -5   6   79.98    0.61   5
  -1  -7   8   33.92    0.60   5
   0 -10   7   39.29    0.61   5
   0  -9   8    8.60    0.47   5
   0  -3   9  566.04    1.90   5
   1 -10   8   17.01    0.60   5
   2   1   7   34.70    0.43   5
   3 -10   9   29.74    0.63   5
   3  -8  10   22.39    0.65   5
   4 -10   9   -0.04    0.47   5
   5 -10   9   65.35    0.86   5
   6  -7  10    7.94    0.51   5
   6  -3  10    5.93    0.51   5
   8  -8   9    1.16    0.30   5
  -1  -9   6  108.30    0.80   5
  -1  -8   7  324.52    1.42   5
  -1  -6   8  174.37    1.09   5
  -1  -4   8  128.34    0.88   5
   0  -6   9   40.48    0.73   5
   0  -4   9  151.65    1.07   5
   0  -2   8    4.57    0.38   5
   2  -4  10   53.79    0.81   5
   3  -1   9    0.75    0.45   5
   4 -12   7    9.15    0.42   5
   4 -11   8    0.28    0.48   5
   4  -3  10   18.42    0.66   5
   5 -12   7    8.11    0.46   5
   5  -3  10    7.88    0.51   5
   6 -12   7    9.47    0.38   5
   6 -11   8    0.43    0.24   5
   6 -11   8    0.38    0.15   5
   6  -5  10    1.97    0.50   5
   6  -4  10    2.05    0.42   5
   8 -10   8    0.77    0.19   5
   8 -10   8    0.52    0.13   5
   8  -3   9    2.92    0.43   5
  -1  -3   7   50.17    0.54   5
   0  -8   8    9.66    0.53   5
   0  -1   7   88.89    0.64   5
   1  -8   9    4.21    0.47   5
   1   0   7   13.02    0.31   5
   2 -11   7    3.46    0.46   5
   2  -6  10  129.45    1.18   5
   3   1   7   72.74    0.63   5
   4  -7  10    0.45    0.53   5
   4  -1   9  150.47    1.10   5
   5  -7  10   63.89    0.89   5
   5  -6  10    1.00    0.54   5
   5  -4  10    4.72    0.50   5
   5  -1   9   42.10    0.67   5
   6  -9   9   97.73    1.00   5
   7  -2   9   27.04    0.57   5
   9  -2   8    5.47    0.40   5
  10  -6   8    0.51    0.23   5
  10  -5   8    9.76    0.38   5
  -1  -7   7   76.49    0.74   5
   0  -9   7    9.74    0.49   5
   1  -9   8    9.80    0.61   5
   1  -7   9    3.21    0.54   5
   1  -3   9    9.45    0.46   5
   2 -10   8   61.32    0.84   5
   2  -2   9  133.39    1.02   5
   4  -9   9  131.05    1.22   5
   5  -9   9    3.38    0.47   5
   5  -5  10    5.61    0.52   5
   7  -8   9    3.69    0.40   5
   8  -6   9    1.67    0.39   5
   8  -5   9   14.01    0.48   5
   9  -8   8    0.71    0.27   5
  -1  -4   7   33.55    0.47   5
   0  -3   8   11.08    0.40   5
   1 -10   7   18.21    0.53   5
   3  -2   9  137.42    1.10   5
   7  -7   9   13.53    0.55   5
  11  -6   7   10.29    0.30   5
  11  -5   7   16.80    0.40   5
  -1  -5   7  181.74    1.00   5
   0  -6   8  158.53    1.12   5
   0  -2   7  158.49    0.88   5
   1  -2   8  237.68    1.19   5
   2  -3   9   53.09    0.73   5
   2  -1   8  259.73    1.23   5
   3 -11   7    3.72    0.45   5
   3  -8   9   16.99    0.63   5
   4 -12   6   87.56    0.92   5
   4 -10   8  107.16    1.09   5
   4  -2   9  136.22    1.09   5
   5  -8   9  146.33    1.29   5
   5  -2   9    4.85    0.48   5
   5   1   7    0.36    0.26   5
   6 -10   8   54.20    0.77   5
   7 -12   6    0.21    0.21   5
   7 -12   6    0.08    0.13   5
   7 -11   7    6.42    0.33   5
   7  -6   9   44.65    0.79   5
   7  -4   9    1.58    0.41   5
   9  -7   8    9.62    0.41   5
  -1  -7   6    3.84    0.30   5
   0  -9   6   73.15    0.76   5
   0  -8   7    0.17    0.37   5
   2  -6   9    4.78    0.51   5
   4  -8   9    3.19    0.53   5
   5 -12   6   20.25    0.55   5
   6 -12   6   13.30    0.41   5
   6 -11   7   72.17    0.83   5
   6  -7   9   54.61    0.83   5
   7  -9   8    6.65    0.45   5
   7  -5   9    1.12    0.46   5
   8 -10   7   20.43    0.54   5
   8  -8   8    1.59    0.40   5
   9  -6   8   11.28    0.44   5
   9  -4   8    1.21    0.39   5
  10  -8   7    1.73    0.22   5
  -1  -4   6    0.50    0.27   5
   1 -10   6    4.94    0.49   5
   1  -3   8  320.09    1.44   5
   1  -1   7    0.56    0.25   5
   3  -9   8    4.74    0.58   5
   3  -1   8  343.77    1.45   5
   6  -6   9    0.29    0.47   5
   6  -5   9   26.56    0.71   5
   6  -4   9    4.60    0.49   5
   6  -1   8   -0.29    0.36   5
   9  -9   7    1.44    0.26   5
  10  -7   7    6.49    0.39   5
  -1  -5   6  304.95    1.18   5
   0  -7   7  415.02    1.66   5
   0  -3   7   66.76    0.62   5
   1  -7   8   26.69    0.62   5
   2  -2   8  367.48    1.52   5
   3   0   7   89.96    0.73   5
   4  -5   9   12.21    0.67   5
   4  -1   8    1.26    0.39   5
   5  -9   8  139.14    1.29   5
   5  -6   9    3.15    0.54   5
   7 -10   7   29.64    0.67   5
   7   0   7    4.08    0.36   5
   8 -12   5    1.05    0.22   5
   8 -12   5    0.24    0.12   5
   8 -11   6    0.42    0.26   5
   8  -3   8    1.82    0.45   5
  10  -4   7    3.19    0.41   5
  -1  -7   5    1.30    0.24   5
   0  -6   7    0.10    0.35   5
   0  -4   7   21.19    0.43   5
   1  -6   8   93.69    0.92   5
   1  -5   8  580.04    2.04   5
   1  -4   8   29.53    0.57   5
   3 -11   6   23.24    0.59   5
   3 -10   7    4.73    0.52   5
   4 -12   5    6.39    0.50   5
   7 -12   5    2.12    0.37   5
   8  -5   8   -0.44    0.49   5
   8  -4   8    3.90    0.45   5
   9  -8   7    2.44    0.39   5
   9  -2   7   55.38    0.76   5
  10  -9   6    0.08    0.26   5
  10  -6   7    8.99    0.40   5
  11  -7   6    3.33    0.31   5
   0  -9   5  101.72    0.80   5
   0  -8   6    5.32    0.36   5
   1  -8   7   68.58    0.83   5
   1  -2   7  885.32    2.11   5
   2  -9   7   36.99    0.72   5
   2  -3   8  237.34    1.29   5
   2  -1   7   33.64    0.49   5
   4 -11   6   -0.04    0.53   5
   4 -10   7    2.04    0.49   5
   4   1   6    0.00    0.26   5
   5 -12   5    5.55    0.48   5
   5 -10   7  149.33    1.30   5
   5   0   7  138.08    0.95   5
   6 -12   5    2.92    0.44   5
   6 -10   7   27.54    0.68   5
   6  -2   8   86.64    0.92   5
   7 -11   6   17.72    0.52   5
   8  -9   7    6.21    0.44   5
  -1  -7   4   81.75    0.59   5
  -1  -6   5   48.28    0.49   5
   2 -10   6   67.14    0.84   5
   2  -6   8    7.11    0.51   5
   2  -4   8   26.74    0.60   5
   3  -7   8    4.26    0.61   5
   4  -8   8   38.45    0.80   5
   5   1   6  245.04    1.12   5
   6 -11   6   45.66    0.75   5
   6  -7   8    9.74    0.69   5
   7  -6   8    0.67    0.51   5
   7  -5   8    5.15    0.59   5
   7  -4   8    9.46    0.56   5
   9 -11   5    4.39    0.29   5
   9 -11   5    1.86    0.20   5
  11  -9   5    1.69    0.23   5
  11  -6   6    2.21    0.26   5
  11  -6   6    1.34    0.17   5
  12  -7   5    2.50    0.22   5
   0  -7   6   27.05    0.51   5
   0  -3   6    8.05    0.28   5
   1  -7   7    4.98    0.43   5
   1  -3   7    6.24    0.35   5
   3  -3   8  251.83    1.39   5
   3  -1   7   78.13    0.75   5
   5  -3   8  145.75    1.23   5
   6  -3   8    3.87    0.47   5
   8 -10   6   16.94    0.54   5
  10 -10   5    0.88    0.21   5
  10 -10   5    0.35    0.13   5
  10  -8   6    8.91    0.42   5
  10  -2   6   72.97    0.82   5
  12  -6   5    0.07    0.21   5
  12  -5   5   12.41    0.41   5
  12  -4   5    3.52    0.31   5
   0  -8   5    7.21    0.36   5
   1  -6   7  103.60    0.91   5
   3  -6   8    6.20    0.52   5
   4 -12   4   28.25    0.61   5
   4  -4   8   29.97    0.74   5
   6  -1   7    4.37    0.48   5
   8 -12   4   11.88    0.39   5
   8 -11   5    5.60    0.41   5
   9  -9   6   36.49    0.66   5
  10 -11   4    0.10    0.12   5
   0  -5   6   23.15    0.44   5
   1  -8   6   30.36    0.59   5
   1  -5   7   53.33    0.67   5
   2 -10   5   41.45    0.70   5
   2  -9   6    6.29    0.54   5
   3  -8   7   22.39    0.71   5
   4 -11   5   32.22    0.76   5
   4 -10   6   10.52    0.64   5
   4  -1   7  162.23    1.03   5
   5 -12   4   12.72    0.55   5
   5  -5   8    7.56    0.57   5
   5  -1   7    0.30    0.37   5
   6 -12   4    9.71    0.55   5
   7 -12   4   12.87    0.48   5
   7 -11   5    3.75    0.50   5
  10  -7   6    4.70    0.43   5
  10  -3   6    0.96    0.38   5
  11  -8   5    3.58    0.29   5
  11  -8   5    2.70    0.21   5
   1  -9   5    1.62    0.36   5
   2  -7   7   95.69    0.97   5
   2  -3   7  189.52    1.11   5
   5 -10   6    5.39    0.57   5
   7  -2   7   19.48    0.57   5
   8 -13   2    3.03    0.28   5
   8  -6   7    2.00    0.48   5
   9 -10   5    4.76    0.36   5
   9 -10   5    2.63    0.24   5
  10  -9   5    1.39    0.32   5
  10  -6   6    7.34    0.44   5
  12  -8   4    8.70    0.34   5
  -4  -2   9  125.34    0.85   6
  -4  -2  10   69.05    0.71   6
  -4  -1   9   35.46    0.48   6
  -4  -1  10   48.74    0.60   6
  -4  -1  11   12.68    0.51   6
  -4   0  10    5.93    0.37   6
  -3  -5   8  218.95    1.08   6
  -3  -5   9   92.61    0.81   6
  -3  -5  10   61.73    0.75   6
  -3  -5  11   86.80    0.95   6
  -3  -3  13   57.08    0.85   6
  -3   3  11    3.76    0.35   6
  -2  -6   6  350.79    1.18   6
  -2  -4  14   20.04    0.67   6
  -2  -1  15    7.20    0.56   6
  -1  -7   5    0.85    0.25   6
  -1  -4  15   11.47    0.62   6
   0  -8  11    0.15    0.43   6
   0  -6  14   82.23    0.95   6
   0  -2  16    4.90    0.44   6
   0  -1  16   15.91    0.51   6
   0   0  16    4.27    0.42   6
   1  -8  12    0.87    0.45   6
   1  -3  16    7.09    0.41   6
   1   1  16    0.83    0.29   6
   2  -3  16    1.19    0.25   6
   3  -9  11   11.34    0.47   6
  -4  -3  10   11.26    0.50   6
  -4  -2  11   19.65    0.54   6
  -4  -1   8  734.04    1.71   6
  -4  -1  12    1.99    0.51   6
  -3   2  13   62.58    0.79   6
  -2  -7   9   80.02    0.86   6
  -1  -8   8   20.22    0.53   6
   0  -5  15   62.71    0.87   6
   0  -3  16    7.55    0.45   6
   0   1  16   15.10    0.49   6
   2  -9  11   10.02    0.46   6
   2  -7  14    0.23    0.31   6
   3  -7  14    7.12    0.37   6
  -4  -3   9  223.95    1.11   6
  -4  -3  11  284.98    1.43   6
  -4  -2   8  349.06    1.24   6
  -4  -2  12  100.30    0.95   6
  -4   0   8  476.12    1.34   6
  -4   1  11   12.76    0.42   6
  -2  -7  10   25.79    0.60   6
  -2   1  15    6.59    0.49   6
  -1  -8   7  336.63    1.38   6
  -1  -8  10  267.01    1.45   6
  -1  -6  14    8.79    0.54   6
  -1  -1  16    3.33    0.43   6
   1  -4  16    5.35    0.33   6
   1  -4  16    2.73    0.22   6
   2  -8  13    0.48    0.29   6
   2  -8  13    0.03    0.18   6
   2  -6  15    3.72    0.32   6
   2  -6  15    0.75    0.17   6
  -4  -4  10   93.33    0.85   6
  -4  -3   8    0.33    0.27   6
  -4  -3  12    0.60    0.47   6
  -4  -2  13  123.77    1.13   6
  -4  -1   7   31.11    0.41   6
  -4  -1  13  111.28    1.00   6
  -4   1   8  661.89    1.54   6
  -4   1  12    1.63    0.38   6
  -3  -6   9  248.73    1.25   6
  -3  -6  10   93.76    0.89   6
  -3  -4  14    3.10    0.61   6
  -2  -6   5   21.88    0.36   6
  -1  -5  15   32.35    0.70   6
  -1  -3  16    2.00    0.43   6
  -1   1  16    3.02    0.42   6
   0  -9   8    7.65    0.39   6
   0  -7  14    1.43    0.45   6
   0  -4  16   19.85    0.54   6
   1  -9  11    3.70    0.39   6
   1  -8  13   13.30    0.49   6
  -4  -4  11   48.63    0.72   6
  -4  -4  12   50.81    0.80   6
  -4  -3  13  107.94    1.04   6
  -4   2  10   72.11    0.61   6
  -4   2  11   22.07    0.50   6
  -3  -6   8    2.58    0.34   6
  -3  -5   6  181.03    0.84   6
  -3  -2  15   24.90    0.68   6
  -3   0  15   51.04    0.81   6
  -2  -2  16    7.09    0.56   6
  -2   2  15    3.56    0.41   6
  -1  -8   6   90.25    0.70   6
  -1  -4  16    3.75    0.46   6
   0  -9  10   60.63    0.76   6
   1  -5  16   18.44    0.49   6
  -4  -4   8    5.12    0.31   6
  -4  -3   7  415.58    1.27   6
  -4  -1  14    3.07    0.48   6
  -4   2   9  127.13    0.72   6
  -4   2  12  103.16    0.85   6
  -3  -3  15    0.21    0.52   6
  -3   1  15   15.74    0.60   6
  -2  -7   6   22.93    0.43   6
  -2  -6  14    2.37    0.46   6
  -2  -3  16    3.41    0.47   6
  -1  -8  12    2.57    0.47   6
  -1  -6  15   23.48    0.63   6
   0  -8  13    1.59    0.41   6
   0  -5  16   10.39    0.43   6
   0  -2  17    1.37    0.29   6
   1  -9  12    5.69    0.44   6
  -4  -5   9  299.39    1.31   6
  -4  -5  10    1.66    0.39   6
  -4  -5  11  144.49    1.09   6
  -4  -4  13    2.61    0.51   6
  -4   0  14   17.88    0.59   6
  -3  -6   7   87.94    0.68   6
  -3  -4  15   24.77    0.66   6
  -1  -7  14   65.04    0.84   6
  -1  -1  17   10.05    0.42   6
   1  -7  15    4.93    0.37   6
  -5  -2  11  154.19    1.04   6
  -5  -1  10   38.01    0.57   6
  -5  -1  11   29.40    0.54   6
  -5  -1  12  232.63    1.32   6
  -4  -5  12  144.76    1.14   6
  -4  -4  14   49.48    0.89   6
  -4   1  14    3.86    0.43   6
  -3  -7  10    2.87    0.44   6
  -3  -7  11    3.42    0.44   6
  -3  -2  16    0.92    0.47   6
  -2  -8   8   70.34    0.70   6
  -2  -4  16    5.63    0.47   6
  -1  -9   9   13.61    0.53   6
  -1  -8  13    5.38    0.46   6
  -1   0  17    5.91    0.38   6
   0  -9  12   17.40    0.54   6
  -5  -3  10    3.80    0.39   6
  -5  -3  11   10.55    0.47   6
  -5  -3  12    7.61    0.56   6
  -5   0  11   51.34    0.63   6
  -3  -6   6    3.91    0.30   6
  -3  -6  14    0.40    0.44   6
  -3  -5  15    2.43    0.49   6
  -3   2  15   24.49    0.54   6
  -2  -7  14    0.75    0.48   6
   0  -8  14   73.62    0.79   6
   0  -6  16    3.99    0.33   6
   0  -4  17    0.24    0.23   6
   2  -9  13    4.60    0.29   6
  -5  -4  11  371.70    1.63   6
  -5  -3   9  203.94    1.05   6
  -5  -3  13   28.80    0.65   6
  -5  -2  13   89.45    0.93   6
  -5  -1  13   47.22    0.71   6
  -5   0   9  834.94    1.86   6
  -5   0  13  293.66    1.47   6
  -5   1  11   28.92    0.55   6
  -4  -6  12  131.82    1.11   6
  -4   2  14   36.95    0.67   6
  -3  -4  16    1.95    0.51   6
  -2  -7   5  252.59    0.94   6
  -2  -2  17    0.07    0.34   6
  -1  -9  11    3.17    0.39   6
  -1  -7  15    1.33    0.35   6
  -1  -4  17   10.98    0.39   6
  -1   1  17    7.58    0.32   6
  -5  -4  10   10.29    0.44   6
  -5  -4  12  134.80    1.08   6
  -5  -2   8  267.02    1.06   6
  -5  -1   8  425.77    1.33   6
  -5  -1  14  111.72    1.02   6
  -5   1  12  233.96    1.21   6
  -4  -6  13    0.13    0.52   6
  -4  -4   6  144.78    0.74   6
  -4  -4  15   43.04    0.77   6
  -4   1  15   57.45    0.74   6
  -3  -7   7  110.19    0.75   6
  -1  -8  14   16.74    0.47   6
  -5  -5  11   -0.03    0.49   6
  -5  -4   9  152.68    0.94   6
  -5  -4  13    3.27    0.50   6
  -5  -3   8  146.65    0.83   6
  -5   1   9   24.65    0.39   6
  -4  -6   8  520.58    1.61   6
  -4  -3  16    1.20    0.52   6
  -4   0  16   56.96    0.82   6
  -2  -8   6  179.11    0.91   6
  -2  -4  17    2.52    0.29   6
  -1  -5  17    0.23    0.22   6
  -5  -5  10  136.52    0.97   6
  -5  -5  12   56.85    0.78   6
  -5  -4  14   17.86    0.61   6
  -5  -2  15  129.31    1.14   6
  -5  -1  15    0.97    0.44   6
  -5   1  14  114.23    1.00   6
  -4  -7  10   90.91    0.88   6
  -4  -5  15    6.58    0.53   6
  -3  -8   9   26.32    0.53   6
  -3  -8  12    0.63    0.49   6
  -3  -7  14    1.76    0.43   6
  -3  -3  17    1.04    0.37   6
  -2  -9   9  116.26    0.93   6
   0  -8  15    0.00    0.23   6
  -5  -5   9   42.93    0.58   6
  -5  -4   8   70.72    0.62   6
  -5  -3  15    1.29    0.48   6
  -5  -1   7  155.99    0.76   6
  -5   1   8  464.42    1.28   6
  -5   2  13   92.83    0.84   6
  -4  -7   9   32.24    0.57   6
  -4  -6   7  112.21    0.74   6
  -4  -5   6   43.26    0.45   6
  -4  -4  16   18.94    0.59   6
  -3  -6   5 1398.08    2.13   6
  -2  -9   8    1.24    0.38   6
  -2  -9  12    3.30    0.44   6
  -1  -8  15    4.62    0.34   6
  -1  -7  16   11.25    0.38   6
  -6  -3  11  760.67    2.20   6
  -6  -3  12   33.40    0.65   6
  -6  -2  11   29.38    0.56   6
  -6  -2  12   32.96    0.63   6
  -6  -2  13    6.89    0.49   6
  -6  -1  11   11.09    0.43   6
  -6  -1  12  128.00    0.99   6
  -5  -6  12    2.17    0.54   6
  -5  -4  15   51.04    0.80   6
  -5  -3   7    2.05    0.25   6
  -5   2   9   79.37    0.59   6
  -4  -6  15    1.74    0.44   6
  -4  -5  16    3.40    0.46   6
  -4  -1  17    1.87    0.42   6
  -3  -7  15    3.01    0.39   6
  -3  -6  16    2.68    0.39   6
  -3   1  17   48.19    0.62   6
  -2  -3  18    0.72    0.24   6
  -6  -4  12  196.72    1.28   6
  -6  -3  10   36.95    0.58   6
  -6  -3  13   22.73    0.61   6
  -6  -2  10  105.75    0.82   6
  -5  -6  10   25.65    0.55   6
  -5  -5   8   53.36    0.57   6
  -5   0   7   86.65    0.55   6
  -5   1  15    1.82    0.42   6
  -5   2  14   20.17    0.54   6
  -4  -7   8    5.45    0.37   6
  -4  -3  17   62.97    0.78   6
  -3  -8   7  161.87    0.93   6
  -2  -8  15    3.37    0.35   6
  -2  -7  16    3.63    0.32   6
  -6  -4  11   34.02    0.62   6
  -6  -4  13   41.67    0.73   6
  -6  -2   9   68.80    0.66   6
  -6   0  10  194.59    1.00   6
  -5  -6   9   92.44    0.79   6
  -5  -6  14    4.17    0.47   6
  -5  -4   7  249.12    1.01   6
  -5  -4  16    2.74    0.44   6
  -3  -9  11   35.59    0.65   6
  -3  -2  18    1.83    0.28   6
  -3  -1  18    4.54    0.32   6
  -2  -6  17    1.09    0.20   6
  -2  -4  18    1.43    0.20   6
  -2  -4  18    0.15    0.11   6
  -6  -5  11   52.69    0.77   6
  -6  -5  12    7.41    0.50   6
  -6  -4  10   71.35    0.73   6
  -6  -4  14  197.98    1.33   6
  -6  -3   9   41.81    0.56   6
  -6  -2  15   62.23    0.83   6
  -6  -1  15    7.57    0.49   6
  -6   1  11   11.13    0.39   6
  -6   1  12  130.28    0.93   6
  -6   1  13  177.88    1.10   6
  -5  -7  11    1.62    0.47   6
  -4  -8  10    4.03    0.43   6
  -4  -7   7   73.66    0.67   6
  -4  -6   6  428.49    1.27   6
  -4   1  17    1.97    0.37   6
  -3  -9   9   54.35    0.71   6
  -3  -7  16   22.54    0.51   6
  -6  -5  14    0.91    0.57   6
  -6  -4   9   78.86    0.71   6
  -6   1  14   62.45    0.77   6
  -5  -6   8   28.33    0.49   6
  -5  -5   7   12.80    0.36   6
  -5  -3  17    4.10    0.42   6
  -5  -2  17   30.57    0.60   6
  -5  -1  17    0.36    0.38   6
  -4  -8   9   10.75    0.43   6
  -4  -5   5 1830.12    2.35   6
  -4  -2  18   11.23    0.42   6
  -3  -9  13   11.40    0.48   6
  -3  -6  17    2.31    0.24   6
  -3  -6  17    0.85    0.15   6
  -3  -4  18    1.14    0.20   6
  -6  -3   8   70.63    0.62   6
  -6  -2   8  163.76    0.86   6
  -6  -2  16   18.05    0.58   6
  -6  -1  16    1.47    0.47   6
  -6   2  12   34.03    0.55   6
  -5  -7   9   26.78    0.60   6
  -5  -7  14    4.34    0.52   6
  -5  -4  17   33.21    0.62   6
  -5   0  17    9.96    0.46   6
  -4  -8  14    4.38    0.39   6
  -4  -3  18   10.00    0.38   6
  -4  -1  18    6.60    0.34   6
  -3  -8   6   12.14    0.32   6
  -2  -8  16    0.33    0.22   6
  -7  -3  12  155.41    1.14   6
  -7  -3  13  188.47    1.28   6
  -7  -2  12   25.54    0.58   6
  -7  -2  13  130.08    1.05   6
  -7  -1  12  109.98    0.94   6
  -7  -1  13   10.66    0.55   6
  -6  -6  11   10.30    0.49   6
  -6  -5   9   75.61    0.71   6
  -6  -5  15   12.74    0.54   6
  -6  -4  16   44.31    0.77   6
  -6   0  16  212.98    1.32   6
  -6   1   9  175.46    0.86   6
  -6   1  15    6.96    0.43   6
  -6   2  11   33.26    0.48   6
  -5  -4   6  425.46    1.22   6
  -4  -7  16    7.47    0.38   6
  -4  -6  17    0.26    0.29   6
  -4  -4  18   33.06    0.55   6
  -3  -5  18    0.75    0.15   6
  -7  -4  12   24.16    0.63   6
  -7  -2  11  193.43    1.13   6
  -7  -1  11  104.13    0.85   6
  -6  -6  10   15.49    0.49   6
  -6  -6  14    2.52    0.45   6
  -6  -4   8    6.52    0.34   6
  -6   0   8  316.79    1.11   6
  -6   2  14   71.58    0.76   6
  -5  -7  15   18.11    0.52   6
  -5  -6   7   25.43    0.44   6
  -5   1  17    0.45    0.34   6
  -4  -9  11   82.13    0.85   6
  -3  -8  16   10.53    0.37   6
  -3  -7  17    2.77    0.24   6
  -2  -9  15    0.68    0.19   6
  -7  -4  11  229.12    1.27   6
  -7  -4  14    1.16    0.48   6
  -7  -3  10   22.21    0.55   6
  -7  -2  10    0.66    0.36   6
  -7  -1  15   22.98    0.66   6
  -7   0  11   12.39    0.51   6
  -7   0  13  311.67    1.47   6
  -6  -5   8    3.94    0.38   6
  -6  -5  16   14.93    0.51   6
  -6  -3  17   26.24    0.58   6
  -6  -2   7   85.28    0.63   6
  -6  -2  17    4.98    0.41   6
  -6  -1  17    4.82    0.41   6
  -6   1  16    0.62    0.42   6
  -5  -8  10   51.14    0.69   6
  -5  -7   8   94.35    0.77   6
  -5  -3  18   66.37    0.72   6
  -4  -9  13   28.47    0.60   6
  -4  -6   5   46.49    0.43   6
  -7  -5  12  143.62    1.11   6
  -7  -5  14   11.68    0.61   6
  -7  -4  10   86.45    0.83   6
  -7  -4  15    5.95    0.50   6
  -7  -1  10  284.83    1.24   6
  -7   0  15    6.42    0.53   6
  -6  -7  11    3.38    0.43   6
  -6  -7  13  188.60    1.26   6
  -6  -6   9    2.04    0.37   6
  -6  -4  17    0.04    0.38   6
  -6  -3   7 1309.78    2.26   6
  -6  -1   7   14.26    0.31   6
  -5  -4  18    8.20    0.37   6
  -4  -9   9    9.76    0.42   6
  -4  -7  17    8.87    0.36   6
  -3 -10  11   16.27    0.45   6
  -7  -5  11    7.01    0.48   6
  -7  -3   9  148.83    0.95   6
  -7  -3  16    2.93    0.43   6
  -7  -2   9  166.74    0.94   6
  -7  -2  16   18.34    0.57   6
  -7   1  11  107.46    0.82   6
  -7   1  12  107.31    0.85   6
  -6  -7  10   17.60    0.50   6
  -6  -5  17   18.32    0.52   6
  -6  -4   7  141.16    0.80   6
  -6   2   9   67.26    0.55   6
  -5  -8   9    3.79    0.39   6
  -5  -3   5  135.07    0.66   6
  -4  -9  14    0.92    0.30   6
  -4  -8  16    1.55    0.25   6
  -3  -7   4  122.60    0.62   6
  -7  -5  10  197.54    1.15   6
  -7  -5  15   50.58    0.77   6
  -7  -4   9    4.12    0.44   6
  -7   1  15   23.29    0.58   6
  -6  -7  15    5.77    0.42   6
  -6  -6   8   48.82    0.58   6
  -6  -3  18    4.46    0.36   6
  -5  -8  15   20.04    0.48   6
  -5  -7   7    1.16    0.30   6
  -8  -2  13   14.56    0.55   6
  -7  -6  14   58.60    0.82   6
  -7  -3  17    2.25    0.40   6
  -7  -2  17   10.39    0.45   6
  -7   0   9  119.24    0.78   6
  -7   1  10  294.98    1.19   6
  -6  -8  13   12.10    0.53   6
  -6  -5   7   55.43    0.55   6
  -6  -1  18    0.16    0.23   6
  -6  -1  18   -0.13    0.14   6
  -5  -9  11  157.67    1.08   6
  -5  -9  13   -0.52    0.43   6
  -5  -8   8    0.93    0.33   6
  -5  -7  17    0.67    0.25   6
  -4  -8   6    8.88    0.35   6
  -8  -4  12  391.26    1.73   6
  -8  -4  14   22.03    0.68   6
  -8  -3  12  451.65    1.80   6
  -8  -2  12   36.79    0.65   6
  -8  -1  12   15.01    0.51   6
  -8  -1  13   84.48    0.86   6
  -7  -6  10   33.94    0.61   6
  -7  -5   9    0.86    0.36   6
  -7  -4  17    1.13    0.37   6
  -7  -2   8  149.52    0.85   6
  -7  -1  17    0.82    0.36   6
  -7   2  12   25.47    0.48   6
  -7   2  13  131.84    0.91   6
  -6  -8  14    9.48    0.48   6
  -6  -6  17   17.30    0.41   6
  -6  -3   6    0.41    0.23   6
  -6  -2   6    4.87    0.24   6
  -6   1   7   12.69    0.30   6
  -6   2   8  162.86    0.76   6
  -5  -8  16    0.49    0.24   6
  -5  -5   5    6.78    0.25   6
  -4 -10  11    1.65    0.38   6
  -8  -4  11  156.53    1.12   6
  -8  -4  15    4.49    0.50   6
  -8  -3  11  187.51    1.16   6
  -8  -2  11    0.34    0.40   6
  -8  -1  11   76.44    0.77   6
  -8   0  12   41.25    0.67   6
  -7  -7  12    8.08    0.49   6
  -7  -7  13   18.04    0.56   6
  -7  -6  16    1.86    0.42   6
  -7  -5  17    4.40    0.41   6
  -7  -4   8  109.17    0.78   6
  -7   0  17   13.50    0.44   6
  -6  -7   8   17.68    0.50   6
  -6  -6   7   14.24    0.45   6
  -6  -4   6  111.83    0.68   6
  -6  -1   6  160.62    0.75   6
  -5  -9   9    1.80    0.41   6
  -4  -6   4  150.03    0.69   6
  -8  -5  13  119.11    1.07   6
  -8  -5  15    5.46    0.55   6
  -8  -3  10   11.38    0.52   6
  -8  -2  10   13.08    0.45   6
  -8  -2  16   39.54    0.69   6
  -7  -6   9  289.11    1.33   6
  -7  -2  18    0.71    0.31   6
  -7   1   9    1.30    0.27   6
  -5  -7   6   71.00    0.59   6
  -8  -6  13    0.72    0.54   6
  -8  -5  11    7.19    0.48   6
  -8  -4  10   46.41    0.66   6
  -8  -1  10    1.71    0.36   6
  -7  -7  10   32.59    0.60   6
  -7  -5   8    5.01    0.37   6
  -7  -4  18    9.15    0.38   6
  -7   2  10    1.03    0.27   6
  -6  -8   9    0.74    0.37   6
  -6  -7  17    5.45    0.28   6
  -6  -5   6   95.39    0.66   6
  -6   0   6  289.28    0.96   6
  -5  -6   5  140.32    0.74   6
  -8  -6  14   92.43    0.96   6
  -8  -6  15    6.36    0.49   6
  -8  -5  10   15.47    0.57   6
  -8  -4  17    1.57    0.40   6
  -8  -3  17   23.60    0.54   6
  -8  -2  17    0.34    0.35   6
  -8  -1  17    4.21    0.42   6
  -8   0  10  767.64    2.01   6
  -8   0  16   34.52    0.61   6
  -7  -8  12    4.80    0.50   6
  -7  -8  13    6.48    0.49   6
  -7  -7  16   16.85    0.45   6
  -7  -6  17   10.57    0.35   6
  -7  -5  18    4.68    0.32   6
  -7  -3   7   44.86    0.52   6
  -6  -9  12   11.78    0.48   6
  -6  -9  13    1.97    0.38   6
  -6  -8  16    9.30    0.33   6
  -6  -8  16    1.75    0.18   6
  -9  -3  14    6.63    0.51   6
  -9  -2  14   41.11    0.75   6
  -8  -6  11   17.25    0.56   6
  -8  -4   9    0.11    0.43   6
  -8  -3   9   14.84    0.46   6
  -8  -2   9   10.70    0.42   6
  -8  -1   9  540.79    1.67   6
  -8   1  11   83.87    0.74   6
  -7  -8  11   68.98    0.84   6
  -7  -8  14    1.93    0.37   6
  -7  -7   9    0.58    0.36   6
  -7  -4   7  382.01    1.32   6
  -7   2   9  163.07    0.86   6
  -6  -9  14    1.35    0.31   6
  -6  -8   8   39.31    0.62   6
  -6   2   7   88.70    0.55   6
  -5 -10  11    9.93    0.41   6
  -9  -4  13   61.08    0.82   6
  -9  -4  14    1.56    0.48   6
  -9  -4  15  102.54    1.02   6
  -9  -3  12  516.19    1.93   6
  -9  -3  15    3.56    0.48   6
  -9  -2  12  364.33    1.62   6
  -9  -1  13    1.70    0.42   6
  -8  -7  12    6.69    0.54   6
  -8  -7  13   53.41    0.77   6
  -8  -7  14    8.22    0.53   6
  -8  -6  10  188.35    1.20   6
  -8  -6  16   18.44    0.50   6
  -8  -5  17    9.96    0.41   6
  -8  -3  18    0.35    0.31   6
  -7  -8  15   28.50    0.54   6
  -7  -5   7  115.66    0.81   6
  -6  -6   6    8.07    0.33   6
  -6  -3   5  743.20    1.58   6
  -6  -2   5   11.35    0.26   6
  -5 -10  10   12.23    0.42   6
  -5  -8   6   76.96    0.66   6
  -9  -5  13    8.07    0.56   6
  -9  -5  14   36.74    0.70   6
  -9  -4  16   40.59    0.71   6
  -9  -3  11    6.04    0.47   6
  -9  -3  16   41.04    0.67   6
  -9  -2  11   50.94    0.75   6
  -9  -1  12    6.48    0.45   6
  -8  -7  15   16.19    0.48   6
  -8  -5   9  115.27    0.90   6
  -8  -4  18    2.61    0.30   6
  -8   1  10    2.00    0.34   6
  -8   2  12   35.64    0.58   6
  -7   0   7   34.17    0.43   6
  -6  -9   9    5.17    0.45   6
  -6  -4   5   16.09    0.33   6
  -5  -9   7    3.41    0.36   6
  -5  -5   4   68.36    0.50   6
  -9  -4  11   10.31    0.52   6
  -9  -1  11    3.81    0.43   6
  -9  -1  16    4.21    0.44   6
  -8  -7  16    3.31    0.37   6
  -8  -6  17    6.39    0.33   6
  -8  -4   8  127.00    0.92   6
  -8  -3   8    8.12    0.40   6
  -8   2  11    1.12    0.36   6
  -7  -9  13    5.98    0.45   6
  -6  -5   5   15.27    0.37   6
  -9  -6  13    8.59    0.51   6
  -9  -6  14    8.03    0.51   6
  -9  -6  15    1.03    0.46   6
  -9  -5  11   70.56    0.85   6
  -9  -5  16    8.36    0.45   6
  -9  -4  17    3.51    0.36   6
  -9  -3  10   38.11    0.64   6
  -9  -3  17    0.20    0.34   6
  -9  -2  10  117.50    0.96   6
  -8  -8  13   10.07    0.51   6
  -8  -6   9    6.88    0.44   6
  -8  -1   8   95.39    0.73   6
  -7  -9  11    2.72    0.47   6
  -7  -9  12   11.20    0.47   6
  -7  -9  14    8.41    0.38   6
  -7  -6   7   32.73    0.52   6
  -7  -4   6   60.26    0.59   6
  -7  -3   6    7.95    0.32   6
  -6 -10  12   21.34    0.49   6
  -6 -10  13    0.05    0.30   6
  -6  -8   7    9.03    0.36   6
  -6  -7   6   43.44    0.52   6
  -9  -5  17   23.29    0.54   6
  -9  -4  10    1.81    0.43   6
  -9  -1  10  125.24    0.93   6
  -9   0  11    9.84    0.48   6
  -8  -8  12   28.29    0.60   6
  -8  -8  14    9.99    0.44   6
  -8  -5   8   31.70    0.55   6
  -8   1   9  582.31    1.65   6
  -7  -1   6  217.51    0.92   6
  -7   1   7    1.00    0.24   6
  -6 -10  11  169.56    1.07   6
  -5  -6   4    3.87    0.22   6
 -10  -3  14   28.48    0.65   6
  -9  -7  14    6.44    0.50   6
  -9  -6  16    0.34    0.33   6
  -9  -5  10   38.78    0.65   6
  -9  -2  18    0.33    0.27   6
  -9   1  12    7.08    0.43   6
  -8  -8  11    0.06    0.39   6
  -8  -7   9  101.42    0.91   6
  -8  -7  17   27.57    0.46   6
  -8   2  10   12.74    0.38   6
  -7  -5   6  102.71    0.72   6
  -6  -6   5   79.37    0.60   6
 -10  -4  13    0.63    0.48   6
 -10  -4  14   20.58    0.63   6
 -10  -4  15    3.12    0.44   6
 -10  -1  14    7.88    0.48   6
  -9  -7  12    3.68    0.46   6
  -9  -7  13    6.04    0.49   6
  -9  -7  15    1.65    0.35   6
  -9  -6  17   31.57    0.55   6
  -9  -4   9    4.53    0.45   6
  -9  -4  18    0.42    0.21   6
  -9  -4  18    0.29    0.14   6
  -9  -3   9   45.97    0.65   6
  -9  -2   9  103.46    0.84   6
  -9   1  16    5.16    0.38   6
  -8  -8  16    7.52    0.32   6
  -8  -6   8   17.66    0.49   6
  -8  -4   7    1.37    0.34   6
  -8  -3   7  238.45    1.11   6
  -8  -2   7   51.82    0.57   6
  -7  -8   8    5.27    0.40   6
 -10  -5  13   53.36    0.78   6
 -10  -5  14    2.76    0.46   6
 -10  -5  15  112.92    1.00   6
 -10  -2  12  326.34    1.58   6
  -9  -7  11   16.92    0.60   6
  -9  -7  16    9.09    0.41   6
  -9  -6  10   42.92    0.69   6
  -9  -5   9   12.89    0.57   6
  -9  -5  18   25.35    0.45   6
  -9  -1   9   42.14    0.60   6
  -8  -9  13    2.93    0.40   6
  -8  -1   7   25.45    0.44   6
  -8   1   8  102.66    0.75   6
  -7  -6   6   12.53    0.39   6
  -6  -3   4  509.32    1.30   6
 -10  -6  14   25.13    0.66   6
 -10  -5  12   13.34    0.57   6
 -10  -5  16    9.26    0.45   6
 -10  -4  11    7.64    0.52   6
 -10  -4  17    6.90    0.42   6
 -10  -3  11   13.59    0.55   6
 -10  -2  11  110.27    0.97   6
 -10   0  14  119.24    1.00   6
  -9   1  10  125.89    0.92   6
  -9   2  12  323.92    1.43   6
  -8  -9  12    0.65    0.39   6
  -8  -7   8    0.88    0.46   6
  -8  -5   7  210.95    1.09   6
  -8   2   9   11.13    0.36   6
  -7 -10  13    5.18    0.32   6
  -7 -10  14    0.25    0.23   6
  -7  -3   5    0.04    0.25   6
  -7   2   7  358.23    1.13   6
  -6  -7   5   29.92    0.46   6
  -5  -7   4  174.41    0.81   6
 -10  -6  13   80.37    0.91   6
 -10  -6  15    3.99    0.41   6
 -10  -5  17   19.65    0.48   6
 -10  -1  11   10.74    0.49   6
 -10   0  12  386.99    1.65   6
 -10   0  16   22.68    0.55   6
  -9  -8  13   34.20    0.62   6
  -9  -8  14   14.23    0.45   6
  -9  -8  15    6.32    0.37   6
  -9  -4   8   33.72    0.63   6
  -9  -3   8  696.35    1.98   6
  -9  -2   8  106.48    0.84   6
  -9   0   9   13.46    0.46   6
  -8  -9  15    6.62    0.29   6
  -8  -8   9    0.09    0.42   6
  -7 -10  11   30.39    0.54   6
  -7  -8   7   15.61    0.49   6
  -7  -4   5    5.97    0.29   6
  -7  -2   5 1050.34    2.00   6
  -7   3   8  174.09    0.81   6
  -5  -5   3   73.11    0.50   6
 -10  -6  16    1.33    0.33   6
 -10  -4  10   31.73    0.70   6
 -10  -3  10   45.31    0.70   6
 -10  -3  18    1.84    0.26   6
 -10  -2  10   15.07    0.54   6
 -10   1  14    7.37    0.51   6
  -9  -1   8   55.62    0.64   6
  -9   2  11   50.56    0.61   6
  -8  -3   6    0.87    0.31   6
  -7 -10  10   95.86    0.87   6
  -7  -9   8  209.29    1.17   6
  -7  -5   5  299.07    1.14   6
  -7  -1   5    1.74    0.24   6
 -11  -4  14    0.43    0.53   6
 -11  -3  14   34.79    0.69   6
 -11  -3  15    2.72    0.46   6
 -11  -2  14    2.57    0.52   6
 -10  -7  13    4.99    0.47   6
 -10  -7  14    7.58    0.42   6
 -10  -7  15    1.65    0.38   6
 -10  -6  11    1.10    0.46   6
 -10  -5  10   41.04    0.75   6
 -10  -4  18    3.65    0.24   6
 -10  -4  18    1.16    0.16   6
 -10  -1  10   80.52    0.82   6
  -9  -8  11   31.20    0.63   6
  -9  -5   8   33.41    0.60   6
  -9   1   9   41.80    0.62   6
  -8  -4   6  105.68    0.77   6
  -8  -2   6  108.74    0.75   6
  -6  -6   4   27.61    0.43   6
 -11  -5  14    2.71    0.53   6
 -11  -4  15   16.06    0.54   6
 -11  -4  16    0.01    0.39   6
 -11  -3  13   24.08    0.66   6
 -11  -3  16  109.09    0.95   6
 -11  -2  13  192.78    1.28   6
 -10  -7  16   13.34    0.43   6
 -10  -5  18    2.76    0.21   6
 -10  -1  18    0.02    0.18   6
 -10  -1  18   -0.04    0.11   6
 -10   1  12  321.28    1.49   6
  -9  -7   9    0.46    0.42   6
  -9  -6   8    6.36    0.51   6
  -9   2  10  121.33    0.88   6
  -8  -7   7  160.17    1.04   6
  -8  -5   6   26.03    0.48   6
  -8  -1   6    3.01    0.29   6
  -8   1   7   26.90    0.43   6
  -7  -6   5   73.17    0.69   6
  -5  -6   3   21.82    0.33   6
 -11  -5  13   65.78    0.84   6
 -11  -5  15    2.37    0.41   6
 -11  -5  16   12.81    0.49   6
 -11  -3  12   46.26    0.76   6
 -11  -1  13   22.86    0.59   6
 -10  -7  11   13.04    0.58   6
 -10  -4   9   36.58    0.65   6
 -10  -3   9   24.12    0.58   6
 -10  -2   9    0.27    0.43   6
 -10   1  11    9.93    0.54   6
  -9  -9  12   43.37    0.68   6
  -9  -9  13   23.43    0.50   6
  -9  -9  14    6.16    0.34   6
  -9  -4   7  146.27    0.97   6
  -9  -3   7    3.26    0.39   6
  -8 -10  12    1.90    0.34   6
  -8 -10  13   18.62    0.42   6
  -8 -10  14    5.70    0.30   6
  -8  -9   9   19.21    0.56   6
  -8   3   9   13.48    0.34   6
  -6  -8   5    7.24    0.33   6
 -11  -6  14    0.74    0.39   6
 -11  -6  15   38.28    0.66   6
 -10  -8  13    0.42    0.41   6
 -10  -8  14    2.98    0.35   6
 -10  -8  15    0.09    0.29   6
 -10  -1   9    8.01    0.46   6
  -9  -5   7    1.88    0.46   6
  -9  -1   7   34.10    0.57   6
  -8 -10  11    0.57    0.36   6
  -8   0   6  413.37    1.33   6
  -7  -8   6    7.14    0.38   6
 -11  -6  13    5.52    0.49   6
 -11  -6  16    9.84    0.38   6
 -11  -5  17    0.29    0.12   6
 -11  -3  18    2.91    0.27   6
 -10  -8  12    2.99    0.41   6
 -10  -7  10    4.85    0.53   6
  -9   1   8   65.30    0.66   6
  -9   2   9  101.25    0.81   6
  -7  -3   4   15.95    0.35   6
  -6  -7   4   22.72    0.40   6
  -6  -4   3    1.30    0.23   6
 -11  -7  14   74.12    0.84   6
 -11  -6  12    6.20    0.52   6
 -11  -4  18   -0.10    0.10   6
 -11  -3  10   27.37    0.71   6
 -11  -2  18   -0.14    0.22   6
 -11  -1  11  270.63    1.46   6
 -10  -8  11    1.46    0.44   6
 -10  -8  16    4.23    0.23   6
 -10  -6   9    0.92    0.46   6
 -10  -4   8  213.97    1.24   6
 -10  -3   8    1.31    0.45   6
 -10  -2   8  299.02    1.41   6
 -10   1  10   85.12    0.81   6
  -9  -9  10    9.41    0.52   6
  -9  -6   7  201.77    1.16   6
  -8 -10  10   17.34    0.47   6
  -8  -8   7   24.57    0.53   6
  -8  -4   5   50.31    0.57   6
  -8  -3   5   47.01    0.55   6
  -7  -5   4   17.12    0.43   6
  -7   1   5    1.43    0.23   6
  -6  -5   3   11.95    0.34   6
 -12  -4  14    2.98    0.50   6
 -12  -4  15    6.40    0.46   6
 -12  -3  14   15.16    0.56   6
 -11  -7  13   14.93    0.50   6
 -11  -7  15    3.27    0.30   6
 -11  -6  11   36.37    0.69   6
 -11  -6  17    3.32    0.20   6
 -11  -2  10    0.35    0.48   6
 -11   0  11  395.30    1.73   6
 -10  -5   8    9.34    0.51   6
 -10  -1   8   23.20    0.60   6
 -10   2  11  111.42    0.89   6
  -9  -3   6  107.42    0.87   6
  -8  -5   5  292.97    1.23   6
  -8   1   6    2.75    0.29   6
  -7  -1   4  511.64    1.40   6
 -12  -5  14   15.80    0.57   6
 -12  -5  15   23.96    0.57   6
 -12  -3  13   77.11    0.91   6
 -12  -3  16    0.57    0.29   6
 -12  -3  16    0.14    0.18   6
 -11  -7  16    0.66    0.20   6
 -11  -1  10   31.19    0.64   6
  -9 -10  13    0.61    0.24   6
  -9 -10  14    0.74    0.22   6
  -9  -4   6  112.96    0.88   6
  -9  -2   6  108.97    0.83   6
  -7  -6   4    1.50    0.36   6
 -12  -5  13   11.99    0.56   6
 -12  -5  16    1.10    0.28   6
 -12  -4  12   28.31    0.70   6
 -12  -3  12    1.50    0.50   6
 -12  -2  17    1.35    0.28   6
 -12  -1  15   99.97    0.93   6
 -11  -4   9   73.86    0.92   6
 -11  -3   9    3.29    0.50   6
 -10  -9  12   28.93    0.54   6
 -10  -9  15    4.78    0.24   6
 -10  -6   8   36.22    0.66   6
 -10   0   8    4.59    0.42   6
 -10   2  10   16.60    0.54   6
  -9  -7   7    0.93    0.43   6
  -9  -1   6  213.28    1.09   6
  -9   1   7   32.09    0.58   6
  -9   2   8  100.55    0.76   6
  -7  -9   6  104.87    0.80   6
  -7  -8   5   44.04    0.60   6
  -6  -6   3   20.42    0.36   6
 -12  -5  12    5.99    0.54   6
 -11  -8  13    4.33    0.38   6
 -11  -8  14    2.92    0.28   6
 -11  -8  15    4.22    0.28   6
 -11  -2   9   39.67    0.71   6
 -11   1  11  269.17    1.42   6
 -10  -9  11   16.68    0.57   6
 -10  -4   7   31.48    0.63   6
 -10  -3   7    5.89    0.47   6
 -10  -2   7  216.73    1.21   6
  -9 -10  11   84.08    0.78   6
  -9  -6   6    8.69    0.52   6
  -9   3   9   43.25    0.59   6
  -8  -9   7    9.88    0.50   6
  -8  -8   6    5.52    0.45   6
 -12  -6  13   20.33    0.56   6
 -12  -6  16    1.25    0.22   6
 -12  -4  11    5.61    0.55   6
 -12  -2  11  182.38    1.31   6
 -11  -8  12   36.96    0.61   6
 -11  -1   9   71.70    0.84   6
 -10  -8   9   70.43    0.83   6
 -10  -5   7  261.93    1.38   6
 -10  -1   7   81.74    0.81   6
  -9 -10  10    1.07    0.40   6
  -7  -7   4    4.53    0.39   6
  -5  -6   2  468.05    1.27   6
 -12  -7  14    4.22    0.41   6
 -12  -6  12    3.13    0.46   6
 -12  -5  11   70.38    0.89   6
 -12   0  12  772.36    2.47   6
 -11  -8  11   40.31    0.70   6
 -11  -3   8   18.91    0.66   6
 -11   1  10   31.35    0.68   6
 -10  -9  10   22.06    0.61   6
 -10  -6   7   33.24    0.69   6
  -9  -9   8  207.02    1.22   6
  -9  -8   7   46.97    0.68   6
  -9  -3   5   22.55    0.56   6
  -8  -7   5    7.61    0.42   6
  -8  -4   4  135.03    0.86   6
  -8  -3   4   49.47    0.57   6
  -8   3   7  251.23    1.04   6
  -7  -3   3  215.02    0.97   6
 -13  -4  15    1.60    0.40   6
 -13  -3  15    2.50    0.43   6
 -12  -7  13   10.09    0.46   6
 -12  -6  11    0.12    0.48   6
 -12  -4  10    8.57    0.58   6
 -12   1  14   30.96    0.63   6
 -11  -5   8  103.12    1.03   6
 -11  -4   8    5.60    0.53   6
 -11  -2   8    7.16    0.52   6
 -11   0   9   11.44    0.51   6
 -10 -10  13    0.09    0.23   6
  -9  -4   5  115.88    0.89   6
  -9  -2   5   14.04    0.46   6
  -9   2   7   45.11    0.61   6
  -8  -5   4    6.64    0.40   6
  -8   1   5  162.80    0.88   6
  -7   1   4  579.97    1.47   6
 -13  -5  14    2.77    0.45   6
 -13  -5  15   -0.47    0.31   6
 -13  -4  13   48.27    0.81   6
 -13  -4  14    0.66    0.41   6
 -13  -3  13    0.35    0.47   6
 -13  -2  15    1.27    0.37   6
 -12  -7  12   13.85    0.50   6
 -12  -5  10   29.78    0.70   6
 -12   1  13   32.84    0.63   6
 -11  -9  13    0.83    0.28   6
 -11  -9  14    0.32    0.20   6
 -11  -7   9    6.55    0.49   6
 -11  -1   8   29.08    0.64   6
 -11   2  11   91.79    0.86   6
 -10 -10  12   56.93    0.65   6
 -10  -8   8   46.29    0.72   6
 -10  -4   6  131.20    1.01   6
 -10  -3   6   58.74    0.74   6
  -9  -5   5    6.97    0.44   6
  -9  -1   5    0.07    0.41   6
  -8  -1   4    0.04    0.30   6
  -7  -1   3  153.67    0.81   6
 -13  -5  13    6.02    0.48   6
 -13  -5  16    3.88    0.28   6
 -13  -4  12   53.39    0.87   6
 -13  -1  14   35.06    0.64   6
 -12  -7  11   46.30    0.78   6
 -12  -6  10   21.11    0.67   6
 -11  -9  12   40.96    0.59   6
 -11   1   9   74.90    0.90   6
 -10 -10  11    2.80    0.36   6
 -10  -7   7   26.88    0.60   6
 -10  -5   6   18.79    0.57   6
  -9  -6   5   29.92    0.68   6
  -8  -9   6    0.49    0.37   6
  -8  -8   5   88.47    0.83   6
  -7  -8   4   23.66    0.51   6
  -7  -6   3   41.05    0.56   6
 -13  -6  14    2.41    0.35   6
 -13  -6  15   13.67    0.41   6
 -13  -5  12   14.86    0.64   6
 -13  -2  12    0.16    0.52   6
 -12  -8  13    4.09    0.35   6
 -11  -3   7    0.47    0.48   6
 -11   2  10    1.06    0.47   6
 -10   1   7   85.45    0.81   6
 -10   2   8  314.92    1.39   6
  -9  -8   6    1.97    0.48   6
  -8   0   4    7.00    0.33   6
 -13  -6  13   10.74    0.47   6
 -13  -4  11    5.92    0.58   6
 -13  -3  11    2.37    0.52   6
 -13  -2  11   71.06    0.97   6
 -12  -8  12   62.72    0.73   6
 -12  -5   9    6.08    0.56   6
 -12  -1   9    4.34    0.53   6
 -11  -7   8   36.24    0.69   6
 -11  -5   7    8.33    0.56   6
 -10 -10  10   16.36    0.50   6
 -10  -6   6  124.33    1.02   6
 -10   3   9   24.05    0.55   6
  -9   0   5  261.15    1.22   6
  -8  -7   4  110.20    0.89   6
  -8   3   6    0.47    0.31   6
  -7   0   3 1256.44    2.25   6
  -6  -6   2    6.29    0.30   6
 -13  -7  14    3.73    0.34   6
 -13  -6  12    0.45    0.42   6
 -13   0  13   88.85    0.93   6
 -12  -8  11    9.27    0.48   6
 -12  -7  10   -0.25    0.46   6
 -11  -9  10   10.54    0.51   6
 -11  -1   7   86.19    0.91   6
 -10   0   6   67.97    0.76   6
  -9  -4   4    5.10    0.43   6
  -9  -3   4  135.97    0.95   6
  -9   2   6  100.52    0.82   6
  -8  -4   3  278.40    1.25   6
  -8   2   5  177.64    0.93   6
  -7  -7   3    0.64    0.40   6
  -7   2   4    2.27    0.24   6
 -13  -7  13    8.13    0.41   6
 -13  -6  11  105.04    1.05   6
 -13  -4  10    9.63    0.65   6
 -13  -3  10  100.88    1.06   6
 -12  -2   8   93.18    1.00   6
 -11   1   8   30.81    0.64   6
 -11   2   9   34.51    0.62   6
 -10  -7   6   13.13    0.55   6
 -10  -4   5  153.72    1.09   6
 -10  -3   5   84.94    0.86   6
 -10  -2   5  202.56    1.24   6
  -9  -5   4   38.01    0.61   6
  -9  -2   4  184.46    1.09   6
  -9   3   7    2.70    0.32   6
  -8  -2   3  117.50    0.82   6
  -8   1   4   -0.18    0.35   6
  -7  -3   2   63.15    0.62   6
 -14  -3  15    1.76    0.27   6
 -14  -3  15    0.62    0.18   6
 -14  -3  16   -0.12    0.23   6
 -14  -2  14   33.53    0.64   6
 -14  -2  15    1.88    0.35   6
 -13  -7  12   17.56    0.51   6
 -13  -2  10  110.27    1.08   6
 -13   1  14   34.32    0.63   6
 -12  -9  13   28.76    0.49   6
 -12  -8  10   69.22    0.82   6
 -12  -7   9   38.53    0.71   6
 -12  -5   8    3.82    0.54   6
 -12  -1   8   24.84    0.74   6
 -11  -4   6   -0.09    0.54   6
 -11  -3   6  142.57    1.11   6
 -11   0   7  136.71    1.07   6
 -10  -5   5  130.58    1.02   6
 -10   2   7  197.25    1.14   6
  -9  -1   4   10.94    0.44   6
  -9   1   5    0.05    0.36   6
  -7   1   3  148.42    0.83   6
 -14  -5  14    4.38    0.31   6
 -14  -5  15    0.96    0.21   6
 -14  -4  13    1.92    0.41   6
 -14  -2  13    0.72    0.42   6
 -13  -1  10  112.29    1.07   6
 -13   0  11   47.92    0.81   6
 -12  -9  12    8.09    0.35   6
 -12  -6   8   81.19    0.93   6
 -11 -10  11    7.26    0.38   6
 -11  -9   9    7.08    0.44   6
 -11  -7   7   21.53    0.60   6
 -11  -5   6   54.08    0.80   6
 -11  -2   6    0.74    0.50   6
 -10  -1   5   97.49    0.89   6
 -10   3   8    1.71    0.42   6
  -8  -8   4    5.53    0.45   6
  -7  -5   2    5.75    0.35   6
 -14  -6  14    0.94    0.27   6
 -14  -3  12   22.22    0.62   6
 -14  -2  12   45.15    0.80   6
 -14  -1  16    0.11    0.24   6
 -13  -7  11    0.58    0.40   6
 -13  -4   9   42.61    0.79   6
 -13  -3   9   41.05    0.79   6
 -13  -2   9   31.03    0.79   6
 -13   1  12  252.70    1.41   6
 -12   1   9    3.77    0.51   6
 -11  -1   6   58.98    0.79   6
 -11   2   8    6.14    0.51   6
 -10  -9   7   15.14    0.50   6
  -7  -1   2  480.11    1.46   6
 -14  -5  12   12.19    0.50   6
 -14  -3  11   53.10    0.85   6
 -14  -1  12  195.71    1.35   6
 -13  -8  12    0.42    0.28   6
 -13  -5   9   60.63    0.88   6
 -13   1  11   20.15    0.66   6
 -12  -7   8    3.78    0.55   6
 -12  -2   7  138.45    1.16   6
 -11   1   7   88.26    0.90   6
  -9  -7   4   15.03    0.58   6
  -8   3   5   50.45    0.56   6
  -6  -5   1   87.17    0.68   6
 -14  -6  12   10.26    0.45   6
 -13  -7  10   61.15    0.78   6
 -13  -6   9   69.61    0.88   6
 -13  -1   9    0.54    0.52   6
 -12  -9  10    3.43    0.39   6
 -12  -1   7   36.97    0.74   6
 -11  -9   8    4.07    0.41   6
 -11  -8   7    5.63    0.48   6
 -10  -7   5   10.34    0.53   6
 -10  -4   4   77.67    0.84   6
 -10  -3   4    9.71    0.51   6
  -9  -4   3   20.70    0.53   6
  -9  -3   3    1.70    0.41   6
  -9   3   6  119.17    0.82   6
  -8  -7   3   54.79    0.65   6
 -14  -7  13    1.37    0.28   6
 -13  -8  11    2.82    0.33   6
 -13  -4   8   19.97    0.70   6
 -13  -3   8  106.13    1.08   6
 -12  -6   7    4.22    0.52   6
 -12   1   8   25.03    0.66   6
 -11  -4   5  208.65    1.32   6
 -11  -3   5    1.64    0.49   6
 -11  -2   5    8.79    0.64   6
 -10  -5   4   51.75    0.74   6
 -10  -2   4  371.04    1.62   6
 -10   2   6   19.84    0.52   6
  -9  -5   3   75.99    0.78   6
  -9  -2   3  357.26    1.48   6
  -9   1   4   10.34    0.49   6
  -8  -4   2   94.73    0.78   6
  -8  -3   2    0.06    0.34   6
  -7  -7   2  121.34    0.85   6
 -15  -3  15    7.35    0.34   6
 -14  -7  12    2.88    0.36   6
 -14  -6  11    2.11    0.40   6
 -14  -4  10  109.35    1.07   6
 -14  -2  10   66.98    0.90   6
 -14   0  12    5.16    0.48   6
 -13  -7   9    0.41    0.49   6
 -13  -5   8   46.24    0.79   6
 -13  -2   8    4.17    0.56   6
 -13   1  10  116.14    1.07   6
 -12  -8   8    9.18    0.56   6
 -12   2   9   59.64    0.79   6
 -11  -5   5   17.33    0.60   6
 -11   2   7    5.22    0.56   6
 -10  -9   6    1.55    0.47   6
 -10   1   5   96.46    0.87   6
  -9  -1   3   99.29    0.84   6
  -8  -2   2    5.47    0.38   6
  -8   1   3  425.06    1.46   6
 -15  -4  13    3.24    0.38   6
 -15  -4  14    0.75    0.23   6
 -13  -8  10    6.16    0.38   6
 -13  -6   8   38.52    0.79   6
 -13   2  11   70.49    0.87   6
 -12  -2   6  123.30    1.11   6
 -11  -1   5  201.00    1.29   6
 -11   3   8   18.45    0.58   6
 -10  -6   4   32.29    0.66   6
  -8  -8   3    1.09    0.40   6
  -8  -1   2  298.11    1.28   6
  -7  -4   1  771.02    1.96   6
  -7  -3   1    4.20    0.35   6
 -15  -5  13    1.69    0.25   6
 -15  -5  14    0.34    0.16   6
 -15  -5  14    0.25    0.10   6
 -15  -4  12   16.68    0.54   6
 -14  -4   9    0.97    0.60   6
 -14   1  12  184.02    1.25   6
 -13  -3   7    8.95    0.69   6
 -12  -1   6   23.57    0.68   6
 -11  -9   7   48.70    0.67   6
 -11  -8   6    0.32    0.46   6
 -10   0   4  117.28    0.96   6
  -7  -5   1  417.67    1.48   6
  -7  -2   1  601.68    1.67   6
  -7   1   2  522.24    1.54   6
 -15  -5  12    1.25    0.35   6
 -15  -1  14    1.86    0.25   6
 -15  -1  15    2.62    0.25   6
 -14  -5   9  109.39    1.05   6
 -14  -2   9   11.05    0.61   6
 -13  -9  11    0.54    0.22   6
 -13  -9  11   -0.03    0.12   6
 -13  -7   8   26.53    0.65   6
 -13  -4   7    1.62    0.55   6
 -12  -6   6   12.94    0.57   6
 -12   1   7   36.85    0.73   6
 -12   2   8   96.37    0.94   6
 -11   0   5  264.53    1.46   6
 -10  -7   4  111.69    0.96   6
  -9  -7   3   16.42    0.55   6
  -9   3   5   21.46    0.53   6
 -15  -6  13    1.49    0.21   6
 -15  -4  11   42.40    0.69   6
 -15  -3  11   22.29    0.58   6
 -15  -1  12    4.21    0.45   6
 -14  -8  12    2.20    0.23   6
 -14  -7  10   10.10    0.44   6
 -14  -6   9    2.44    0.51   6
 -14  -1   9    6.43    0.58   6
 -12  -9   8    3.42    0.42   6
 -12  -8   7    3.57    0.47   6
 -12   0   6    8.46    0.56   6
 -11  -4   4    7.14    0.55   6
 -11  -3   4  128.71    1.10   6
 -11  -2   4   14.27    0.67   6
 -10  -4   3   61.12    0.79   6
 -10  -3   3    6.49    0.50   6
 -10  -2   3   58.10    0.77   6
 -10   3   6   59.94    0.69   6
  -9  -4   2    4.67    0.51   6
  -8   0   2 1199.65    2.50   6
  -8   3   4   55.22    0.58   6
  -7  -6   1   63.40    0.68   6
  -7  -1   1    6.38    0.34   6
 -15  -6  12   13.52    0.40   6
 -15  -5  11    7.87    0.44   6
 -15  -2  11    1.96    0.44   6
 -14  -8  11    0.34    0.26   6
 -14  -3   8   26.03    0.70   6
 -13  -9  10    2.03    0.25   6
 -13  -6   7   23.17    0.65   6
 -12  -7   6   33.14    0.68   6
 -12  -3   5   60.54    0.88   6
 -12  -2   5  216.04    1.42   6
 -11  -5   4    3.64    0.51   6
 -11   2   6    0.37    0.46   6
 -11   3   7    0.09    0.48   6
 -10  -9   5   52.84    0.72   6
 -10  -5   3   54.54    0.76   6
 -10   1   4  201.23    1.20   6
  -9  -5   2    5.19    0.54   6
  -9  -2   2  185.94    1.12   6
  -8   2   3  119.38    0.82   6
  -6  -4   0  724.05    1.77   6
  -5  -6   0    1.85    0.21   6
 -15  -6  11   18.17    0.51   6
 -15  -4  10    1.91    0.44   6
 -14  -5   8    0.45    0.49   6
 -14  -2   8   47.28    0.84   6
 -13  -8   8   21.44    0.56   6
 -13  -4   6   25.06    0.76   6
 -13  -3   6   69.68    1.02   6
 -13   2   9   33.31    0.66   6
 -12  -1   5   14.21    0.71   6
 -12   2   7  135.76    1.14   6
 -11  -9   6   11.10    0.47   6
 -11  -6   4   29.35    0.66   6
 -11  -1   4   67.99    0.87   6
 -11   1   5  177.97    1.22   6
 -10  -6   3    0.69    0.47   6
 -10  -1   3  102.85    0.94   6
  -8  -4   1    3.76    0.41   6
  -8  -3   1  242.15    1.20   6
  -6  -5   0  668.54    1.76   6
  -6  -2   0   37.44    0.48   6
 -14  -8  10    8.15    0.37   6
 -14  -7   9    7.72    0.43   6
 -14  -1   8   14.33    0.65   6
 -13  -7   7   13.79    0.52   6
 -12   1   6   22.09    0.62   6
 -11  -8   5   44.76    0.70   6
  -9  -8   3    7.60    0.47   6
  -9  -6   2    0.30    0.44   6
  -8  -5   1  612.37    1.89   6
  -8  -2   1  438.71    1.59   6
 -15  -1  10   10.71    0.52   6
 -15   0  11    5.49    0.44   6
 -14   2  11    3.54    0.46   6
 -12  -9   7   24.30    0.52   6
 -10  -7   3   27.86    0.67   6
  -8  -1   1  107.90    0.88   6
 -16  -4  12    4.96    0.33   6
 -16  -2  13   15.08    0.41   6
 -15  -4   9   93.44    0.96   6
 -15  -2   9   12.21    0.56   6
 -14  -5   7   50.61    0.85   6
 -14  -4   7   22.16    0.68   6
 -14  -2   7    1.30    0.54   6
 -14   0   8   43.99    0.77   6
 -14   1   9    6.48    0.56   6
 -13  -6   6    9.29    0.56   6
 -12  -3   4    5.79    0.66   6
 -11  -4   3    3.84    0.53   6
 -11  -3   3   40.75    0.75   6
 -11   2   5    9.19    0.60   6
 -11   3   6  142.46    1.08   6
 -10   3   5   85.07    0.81   6
  -9   3   4  121.05    0.87   6
  -7  -4   0   29.45    0.55   6
 -14  -1   7   46.98    0.88   6
 -14   2  10   74.62    0.82   6
 -13  -3   5   46.84    0.90   6
 -12  -2   4   91.88    1.01   6
 -12   2   6  118.79    1.11   6
 -11  -5   3    1.48    0.49   6
 -11  -2   3   22.63    0.64   6
 -11   1   4   67.55    0.89   6
 -10  -5   2    1.82    0.56   6
 -10  -4   2   27.41    0.64   6
 -10  -2   2    3.75    0.49   6
  -9   2   3  355.00    1.48   6
  -9   4   5  108.49    0.84   6
  -8   3   3  182.73    1.03   6
  -7  -5   0  324.30    1.39   6
  -7  -2   0  146.88    0.91   6
  -7   1   1    7.08    0.36   6
 -16  -3  11    2.46    0.36   6
 -16  -2  11   17.58    0.52   6
 -16  -1  12    0.40    0.28   6
 -15  -7  10    1.79    0.27   6
 -15  -6   9   31.22    0.59   6
 -15   1  11   37.33    0.62   6
 -14  -6   7    2.45    0.45   6
 -13  -7   6    2.52    0.43   6
 -13  -5   5   -0.08    0.58   6
 -13  -4   5   14.50    0.66   6
 -13   3   9   37.07    0.63   6
 -12  -1   4    7.04    0.58   6
 -12   1   5   12.98    0.58   6
 -12   3   7   61.81    0.84   6
 -11  -9   5    4.92    0.40   6
 -11  -1   3    0.84    0.52   6
 -10  -1   2  194.93    1.29   6
 -10   1   3   95.64    0.90   6
  -9  -4   1  281.68    1.40   6
  -9  -3   1  192.26    1.19   6
  -9  -2   1   11.79    0.59   6
  -6   0   0   13.80    0.34   6
 -16  -5  11   27.94    0.51   6
 -15  -4   8   13.08    0.55   6
 -15  -3   8   94.64    1.01   6
 -15  -2   8   -0.49    0.48   6
 -15   0   9    2.78    0.50   6
 -14  -4   6   74.80    1.00   6
 -14  -3   6   -0.24    0.63   6
 -14   1   8   14.08    0.62   6
 -12  -9   6    1.90    0.35   6
 -12  -8   5    7.06    0.54   6
 -12  -6   4   29.87    0.69   6
 -11  -8   4  154.37    1.11   6
 -10  -6   2   44.55    0.72   6
  -8  -7   1  113.93    0.87   6
  -7  -6   0  109.38    0.86   6
  -5  -5  -1  139.59    0.80   6
 -16  -4  10    2.82    0.33   6
 -16  -1  11    5.84    0.36   6
 -15  -1   8   19.53    0.68   6
 -15   1  10   13.67    0.52   6
 -14  -5   6    2.98    0.50   6
 -14  -2   6  101.73    1.07   6
 -13  -6   5    5.43    0.52   6
 -12   0   4   34.29    0.74   6
 -11   0   3  442.67    1.89   6
 -10   0   2    3.33    0.55   6
  -9  -8   2   74.32    0.80   6
  -9  -1   1   17.62    0.54   6
  -8  -4   0    5.33    0.52   6
 -16  -5  10    0.49    0.27   6
 -15  -6   8    0.25    0.35   6
 -14  -1   6    0.42    0.55   6
 -13   3   8  106.19    0.96   6
 -12  -7   4   17.53    0.61   6
 -11  -7   3   47.23    0.74   6
 -11  -3   2    6.06    0.64   6
 -10   2   3   57.45    0.82   6
 -10   3   4    8.36    0.46   6
  -8  -2   0  290.70    1.35   6
  -8   1   1  105.27    0.83   6
  -6  -4  -1  471.14    1.50   6
 -16  -4   9    2.16    0.36   6
 -16  -1  10    0.28    0.34   6
 -15  -4   7   55.62    0.80   6
 -15  -3   7   14.21    0.57   6
 -15   1   9    1.69    0.50   6
 -14   1   7   48.71    0.79   6
 -14   2   8   46.30    0.79   6
 -13  -4   4   16.31    0.67   6
 -13  -3   4   33.42    0.76   6
 -12  -2   3   18.58    0.68   6
 -12   2   5  230.88    1.42   6
 -12   3   6   36.90    0.67   6
 -11  -5   2   52.07    0.86   6
 -11  -4   2    3.78    0.53   6
 -11   1   3    0.61    0.57   6
 -11   4   6    0.10    0.44   6
 -10  -3   1  133.26    1.14   6
  -9   0   1   25.29    0.57   6
  -9   3   3    1.99    0.36   6
  -9   4   4    5.23    0.40   6
  -8  -1   0   51.49    0.72   6
  -7   2   1  567.71    1.68   6
  -6  -5  -1  187.80    1.00   6
  -6   1   0  194.32    0.96   6
 -16  -6  10    5.47    0.26   6
 -16  -5   9    5.32    0.35   6
 -16  -2   9    5.05    0.44   6
 -15  -7   8    8.88    0.39   6
 -15  -5   7    0.24    0.40   6
 -15  -1   7    2.83    0.59   6
 -14  -3   5   25.18    0.79   6
 -14   0   6    2.22    0.52   6
 -13  -5   4    4.59    0.53   6
 -12  -1   3  262.00    1.57   6
 -12   1   4    6.59    0.54   6
 -11  -1   2   31.52    0.70   6
 -10  -5   1  103.35    1.02   6
 -10  -4   1   27.07    0.64   6
 -10  -2   1   27.74    0.66   6
 -10   1   2  206.35    1.28   6
  -9  -7   1   22.07    0.59   6
  -9   2   2  174.44    1.10   6
  -8  -6   0  115.50    0.93   6
 -16   0  10    2.02    0.36   6
 -15   2  10    0.40    0.29   6
 -15   2  10    0.24    0.18   6
 -14  -7   6    0.22    0.34   6
 -14  -5   5    5.71    0.59   6
 -12  -8   4   52.45    0.74   6
 -11  -8   3   62.17    0.76   6
  -9  -4   0   56.86    0.80   6
  -9  -3   0  286.20    1.50   6
  -8   3   2   -0.03    0.32   6
  -8   4   3  285.16    1.25   6
  -7  -4  -1    5.16    0.39   6
  -7  -3  -1  182.23    1.04   6
  -6  -6  -1  172.70    0.98   6
 -16  -6   9    0.56    0.24   6
 -15  -3   6  118.72    1.14   6
 -15   0   7    4.89    0.57   6
 -10  -6   1    0.61    0.46   6
  -9  -5   0  102.57    1.01   6
  -9  -2   0    8.90    0.52   6
  -9   1   1   17.69    0.52   6
  -8   0   0   83.65    0.80   6
  -7  -5  -1  398.06    1.53   6
 -16  -5   8    0.28    0.32   6
 -15  -4   6    9.76    0.53   6
 -15  -2   6    1.34    0.48   6
 -15   2   9   11.43    0.45   6
 -14  -6   5    1.26    0.42   6
 -12  -7   3   53.75    0.78   6
 -12   2   4   99.84    1.03   6
 -11  -7   2   67.12    0.89   6
 -11   2   3   27.54    0.69   6
 -11   3   4  133.78    1.07   6
  -9  -1   0   33.52    0.66   6
  -8  -7   0  246.78    1.25   6
  -7  -1  -1   60.20    0.66   6
 -16  -1   8    1.10    0.41   6
 -16   1  10   -0.26    0.31   6
 -15  -7   7   19.26    0.44   6
 -15  -1   6   13.62    0.60   6
 -14  -8   6    0.76    0.33   6
 -14   3   8   25.97    0.58   6
 -13  -7   4   25.25    0.60   6
 -13  -4   3    2.48    0.56   6
 -13  -2   3    3.16    0.59   6
 -12  -2   2  259.54    1.60   6
 -12   1   3  222.20    1.52   6
 -11  -4   1  131.08    1.15   6
 -11  -3   1    9.23    0.60   6
 -11  -2   1    4.42    0.63   6
 -11   4   5  225.97    1.27   6
  -9  -6   0   41.01    0.72   6
  -8  -4  -1  161.34    1.12   6
  -8  -3  -1  100.72    0.90   6
  -7  -6  -1  149.52    1.00   6
  -6   2   0   30.72    0.47   6
 -17  -2  10   -0.20    0.21   6
 -17  -2  10   -0.06    0.12   6
 -16  -6   8    6.67    0.32   6
 -15   1   7    3.04    0.49   6
 -14  -7   5    2.09    0.42   6
 -14  -4   4   17.43    0.64   6
 -14  -3   4   63.28    0.93   6
 -14  -2   4    4.19    0.57   6
 -13  -1   3    0.29    0.61   6
 -11   1   2   33.97    0.72   6
 -10  -3   0   42.34    0.82   6
  -9   3   2    9.73    0.46   6
  -9   4   3   19.81    0.53   6
  -8  -5  -1  146.93    1.09   6
  -8   1   0   50.44    0.66   6
  -7   0  -1   11.59    0.47   6
  -7   3   1    3.86    0.32   6
  -7   4   2    1.18    0.29   6
 -16  -5   7    9.06    0.44   6
 -16  -2   7   -0.23    0.39   6
 -15  -4   5   12.32    0.59   6
 -15  -3   5   16.03    0.66   6
 -14  -5   4   10.31    0.55   6
 -14  -1   4    1.53    0.54   6
 -14   1   5   10.17    0.66   6
 -14   2   6  113.25    1.06   6
 -13  -6   3   18.90    0.63   6
 -12  -8   3    2.68    0.44   6
 -11  -1   1   30.50    0.73   6
 -10  -4   0   96.36    0.99   6
 -10  -2   0    3.39    0.54   6
  -9   2   1   12.17    0.51   6
  -8  -1  -1  268.87    1.37   6
  -5  -5  -2   31.50    0.44   6
 -17  -2   9    5.56    0.33   6
 -16  -1   7   29.07    0.62   6
 -15  -5   5    1.78    0.46   6
 -15  -2   5   18.37    0.61   6
 -14  -6   4    3.14    0.47   6
 -14   3   7   59.69    0.77   6
 -13   0   3  201.79    1.45   6
 -12   0   2   30.55    0.75   6
 -12   3   4    5.71    0.65   6
 -11  -8   2  132.30    1.02   6
 -11   0   1  128.35    1.22   6
 -11   3   3   41.28    0.81   6
 -10  -5   0   84.03    0.95   6
  -8  -6  -1    2.22    0.45   6
  -8   3   1  245.95    1.28   6
  -6  -2  -2   27.18    0.50   6
  -5  -1  -2   25.64    0.42   6
 -17  -1   9    0.19    0.25   6
 -16  -6   7    7.51    0.36   6
 -15  -1   5    0.87    0.47   6
 -15   1   6   13.81    0.60   6
 -15   2   7   27.06    0.66   6
 -14   0   4  120.81    1.16   6
 -13  -3   2  116.53    1.22   6
 -12  -7   2   60.63    0.84   6
 -12   2   3   21.34    0.65   6
 -12   4   5    0.97    0.51   6
 -10  -6   0  141.75    1.17   6
  -9  -4  -1  123.16    1.05   6
  -9  -3  -1   14.37    0.57   6
  -9  -2  -1  278.60    1.51   6
  -9   1   0   34.49    0.66   6
  -8   4   2  102.23    0.82   6
  -7  -3  -2   39.84    0.66   6
  -6  -5  -2    2.60    0.33   6
 -17  -3   8    0.46    0.25   6
 -16  -3   6    1.75    0.40   6
 -16   1   8    0.10    0.28   6
 -15  -6   5    7.73    0.40   6
 -14  -4   3    1.08    0.54   6
 -14  -2   3    6.96    0.69   6
 -14   2   5   15.90    0.72   6
 -13  -7   3    0.36    0.42   6
 -13  -4   2    0.52    0.50   6
 -12  -4   1   12.50    0.62   6
 -12   1   2   53.52    0.88   6
 -11  -7   1  136.36    1.11   6
 -10   2   1   25.90    0.71   6
  -9  -5  -1    5.04    0.51   6
  -9  -1  -1   64.39    0.89   6
  -8   2   0  303.15    1.44   6
  -7  -4  -2   13.31    0.48   6
  -7  -2  -2    8.52    0.43   6
 -17  -2   8    1.14    0.24   6
 -16  -5   6    4.33    0.35   6
 -15   0   5   21.47    0.65   6
 -12  -5   1    1.85    0.49   6
 -11  -2   0    5.13    0.59   6
  -7  -5  -2   56.92    0.68   6
  -6   3   0  508.33    1.58   6
 -15   1   1    0.45    0.36   7
 -14   3  -2    3.00    0.31   7
 -13  -1   0   37.41    0.77   7
 -13   1  -2    3.30    0.46   7
 -11  -3   6  131.62    1.01   7
 -11  -2  -1   25.23    0.67   7
 -10  -2  -2   84.36    0.93   7
  -9  -1  -4   50.40    0.71   7
  -6   0  -6  119.66    0.82   7
 -15   0   3    1.15    0.42   7
 -13  -2   3    2.39    0.50   7
 -13   0  -1  107.22    1.03   7
 -13   3  -3    3.52    0.37   7
 -12  -2   8  103.58    0.89   7
 -12  -1  -1   35.67    0.75   7
 -12   1  -3    6.06    0.49   7
 -12   3  -4    0.62    0.35   7
 -11   1  -4   14.69    0.53   7
 -10  -3   1  111.95    1.00   7
 -10  -3   6   48.58    0.69   7
 -10  -1  -3   46.47    0.72   7
  -9  -3   0  255.07    1.38   7
  -8  -3  -1  112.78    0.89   7
  -8  -3   6    0.42    0.31   7
  -8  -2  -3    2.70    0.38   7
  -6  -1  -5   29.71    0.47   7
  -5  -3  -1  222.22    0.96   7
  -5  -1  -5    1.59    0.29   7
 -17   3   7   -0.19    0.17   7
 -14   1   0    3.44    0.50   7
 -14   4  -2   24.15    0.45   7
 -13  -1   1   10.15    0.58   7
 -11   0  -3   45.95    0.74   7
 -10  -3   2    9.89    0.54   7
  -9  -3   6  127.16    0.90   7
  -9  -2  -2   32.85    0.62   7
  -8  -1  -4  191.32    1.19   7
  -7  -2  -3  198.72    1.12   7
  -6  -3  -1  199.54    1.00   7
 -15   0   5   22.61    0.63   7
 -14  -1   6   -0.37    0.48   7
 -14   5  -2    0.37    0.23   7
 -12  -2   2  237.80    1.52   7
 -12  -2   7  140.06    1.08   7
 -12   4  -4    2.61    0.35   7
 -10  -3   3    6.52    0.45   7
 -10  -3   4    7.89    0.49   7
 -10  -3   5   82.05    0.82   7
 -10  -2  -1   38.20    0.70   7
 -10   2  -5    3.20    0.47   7
  -9  -3   1  177.39    1.15   7
  -8  -3   0  192.92    1.13   7
  -6  -2  -3   65.66    0.67   7
  -5  -2  -3   33.16    0.46   7
 -16   2   4   24.24    0.54   7
 -16   4   2    4.38    0.28   7
 -15   4   0    7.72    0.35   7
 -14   0   2    1.90    0.50   7
 -13   1  -1    4.08    0.57   7
 -12  -2   6  115.68    1.05   7
 -12   2  -3   15.40    0.63   7
 -11  -2   1    2.90    0.55   7
 -11   2  -4    1.85    0.47   7
  -9  -1  -3    5.05    0.44   7
  -9   1  -5    0.46    0.40   7
  -8  -3   1  210.92    1.17   7
  -7  -3   0   70.24    0.68   7
  -6  -3   0  459.78    1.47   7
 -16   2   5    0.82    0.34   7
 -16   2   7    0.05    0.33   7
 -15   1   3   14.08    0.56   7
 -14   1   1   41.55    0.75   7
 -13   5  -3    0.25    0.18   7
 -12  -2   4   74.34    0.85   7
 -12   1  -2    3.93    0.49   7
 -11  -2   7    5.81    0.43   7
 -11  -1  -1   66.18    0.87   7
 -10  -2   0    2.84    0.43   7
 -10  -1  -2   39.35    0.65   7
  -9  -3   3    1.32    0.32   7
  -9  -3   4  123.19    0.92   7
  -7   0  -5    4.02    0.34   7
  -6  -3   2   18.77    0.38   7
 -15   1   4   61.06    0.72   7
 -13  -1   3    0.01    0.40   7
 -11   1  -3   -0.45    0.36   7
  -8  -3   3  221.13    1.09   7
  -7  -3   3  214.73    0.91   7
 -13   2  11   71.51    1.06   8
 -12   0  14  232.30    1.47   8
 -12   2   8   93.06    1.13   8
 -12   6   7    4.18    0.67   8
 -12   8   8    9.82    0.57   8
 -11  -1  10   33.79    0.71   8
 -11   1   7   89.77    1.01   8
 -10   5   4   46.80    0.78   8
 -10   6   4   34.78    0.78   8
  -9  -1   6  211.07    1.22   8
  -9   4   3   18.92    0.55   8
  -9   7   3   16.16    0.59   8
  -8  -3   8    7.99    0.39   8
  -8   1   3  399.69    1.51   8
  -8   4   2   96.87    0.87   8
  -8   7   2    4.70    0.46   8
  -7   5   1  451.77    1.59   8
  -7   6   1   78.04    0.76   8
 -13   1  13  194.05    1.45   8
 -13   2  16    0.30    0.29   8
 -13   4   9   41.67    0.87   8
 -13   5   9   61.57    0.97   8
 -13   6   9   73.74    1.02   8
 -13   9  12    7.84    0.38   8
 -10   0   6   66.16    0.82   8
 -10   4   4   72.47    0.90   8
 -10   7   4  110.66    1.11   8
 -10   9   5   52.71    0.81   8
  -8   3   2    0.23    0.36   8
  -7   1   2  476.98    1.53   8
  -7   4   1  779.81    2.04   8
 -14   4  13    1.58    0.44   8
 -14   5  13   10.33    0.51   8
 -14   5  14    3.86    0.35   8
 -14   5  15    1.24    0.30   8
 -14   6  13    0.47    0.36   8
 -14   6  14    2.34    0.32   8
 -13   2  10  108.96    1.17   8
 -13   3   9   36.42    0.94   8
 -13   7   9    0.29    0.50   8
 -13   9  11   -0.10    0.32   8
 -12   9   8    3.28    0.52   8
 -11   4   5  202.24    1.41   8
 -11   5   5   15.95    0.63   8
 -11   6   5   33.37    0.74   8
 -11  10   7    2.48    0.48   8
 -10  -2   9    0.43    0.38   8
 -10  -1   7   80.12    0.87   8
 -10   1   5   91.21    0.92   8
 -10   3   4    9.63    0.52   8
  -9   8   3    7.01    0.55   8
  -7   3   1    4.54    0.39   8
 -14   4  15    0.47    0.25   8
 -14   5  11   48.55    0.89   8
 -14   7  12    3.81    0.43   8
 -14   7  13    1.94    0.31   8
 -13   5   8   41.32    0.91   8
 -12   1   8   24.47    0.72   8
 -12   2   7  131.37    1.27   8
 -11   0   7  130.80    1.13   8
 -11   1   6   52.76    0.88   8
  -9   2   3  360.84    1.56   8
  -8   2   2    5.56    0.41   8
  -7  -3   6    7.83    0.29   8
 -14   3  12   23.83    0.70   8
 -14   3  15    1.50    0.31   8
 -14   4  11    0.84    0.53   8
 -14   6  11    2.37    0.46   8
 -13   2   9   33.10    0.84   8
 -13   4   8   20.91    0.74   8
 -13   6   8   39.32    0.85   8
 -13   8   9    2.44    0.42   8
 -13   9  10    2.00    0.35   8
 -12  -1  12   14.41    0.58   8
 -11  -2  11   81.60    0.97   8
 -11  -1   8   29.43    0.76   8
 -10   2   4  374.31    1.72   8
  -8  -3   7  247.07    1.16   8
  -8  -2   5  176.08    1.04   8
 -14   2  13   -0.04    0.42   8
 -14   2  14   39.20    0.73   8
 -14   3  11   61.33    0.93   8
 -14   5  10    0.41    0.53   8
 -14   8  12    3.68    0.36   8
 -13   0  13   86.00    0.96   8
 -13   3   8  105.30    1.18   8
 -13   7   8   23.88    0.69   8
 -12   3   6   35.65    0.80   8
 -12   7   6   40.78    0.84   8
 -11  -2  10    0.13    0.52   8
 -11   2   5    9.72    0.59   8
 -11   8   5   41.71    0.78   8
 -10  -1   6  120.49    1.01   8
  -9  -3   8  663.97    2.04   8
  -9  -2   6  102.84    0.90   8
  -9   5   2    5.04    0.57   8
 -13   0  11   47.55    0.85   8
 -12   0   8   30.11    0.71   8
 -12   1   7   34.77    0.77   8
 -12  10   8    2.35    0.35   8
 -10   1   4  209.70    1.29   8
 -10   4   3   63.81    0.85   8
 -10   6   3    0.95    0.49   8
  -9   1   3   97.17    0.88   8
  -9   6   2    0.44    0.42   8
   0  -2  10  136.59    1.01   9
   1  -7  12    3.13    0.48   9
   1  -3  11  192.39    1.33   9
   3  -3  11   25.17    0.66   9
   5  -4  11  158.84    1.27   9
   5  -2  10    9.54    0.53   9
   6 -11  10   -0.09    0.17   9
   6  -6  11    2.12    0.44   9
   6  -3  10    5.11    0.57   9
   7  -2   9   24.67    0.62   9
   7   0   7    2.87    0.42   9
   9 -11   8    0.07    0.08   9
   9  -7   9    3.05    0.32   9
  10  -8   8    6.33    0.26   9
  11  -8   7    2.78    0.20   9
  11  -6   7   19.19    0.42   9
  11  -3   6   18.75    0.47   9
  -1  -5  11   15.74    0.53   9
   2  -7  12    0.29    0.40   9
   2  -3  11    3.08    0.44   9
   4 -12  10    5.32    0.25   9
   4 -10  11    3.53    0.32   9
   4  -4  11    7.11    0.58   9
   4  -2  10   80.39    0.95   9
   5  -9  11    4.67    0.38   9
   5  -5  11    0.31    0.48   9
   7  -9  10    2.26    0.27   9
   7  -1   8   16.48    0.54   9
  11  -7   7    1.16    0.19   9
  12  -4   5    3.26    0.31   9
   0  -4  11    1.63    0.37   9
   1  -2  10    4.16    0.38   9
   2  -2  10   77.11    0.87   9
   3  -4  11    4.78    0.58   9
   3  -2  10    0.53    0.41   9
   4  -1   9  123.89    1.07   9
   4   0   8   47.18    0.67   9
   5  -8  11   30.62    0.61   9
   6  -2   9    4.55    0.54   9
   8 -12   8    0.32    0.08   9
   8  -1   7   19.38    0.56   9
   9  -2   7   56.02    0.77   9
  10  -2   6   64.03    0.77   9
  13  -8   4    0.39    0.12   9
  13  -6   4   10.58    0.30   9
   0  -5  11    6.99    0.47   9
   2  -4  11   34.39    0.69   9
   2  -1   9    8.79    0.40   9
   3 -10  11    6.73    0.37   9
   3  -1   9    1.02    0.33   9
   4  -9  11   14.15    0.48   9
   4  -5  11   93.15    1.01   9
   5  -3  10    8.48    0.52   9
   6 -12   9    0.61    0.17   9
   6 -10  10   12.77    0.41   9
   6  -4  10    1.90    0.46   9
   7  -8  10    1.71    0.31   9
   7  -3   9    0.75    0.42   9
   9  -1   6   22.92    0.53   9
  11  -4   6    4.27    0.35   9
   2 -10  11    2.88    0.34   9
   3  -5  11    8.13    0.52   9
   4  -8  11   24.62    0.62   9
   4  -6  11    6.26    0.49   9
   6  -5  10    1.25    0.52   9
   7 -11   9    0.11    0.15   9
   7 -11   9    0.17    0.09   9
   8  -9   9    1.09    0.23   9
   8  -6   9    2.40    0.48   9
   8  -3   8    1.82    0.49   9
  10 -10   7    2.97    0.20   9
  11 -10   6    0.53    0.10   9
  12  -9   5    0.37    0.14   9
   0  -8  11    0.36    0.44   9
   0  -7  11  305.45    1.60   9
   0  -6  11  171.45    1.20   9
   1  -5  11   65.51    0.85   9
   1  -3  10  304.42    1.55   9
   3  -9  11   12.98    0.46   9
   3  -6  11   38.67    0.77   9
   3  -3  10   14.99    0.54   9
   5  -4  10    5.11    0.49   9
   5  -2   9    4.60    0.44   9
   5   0   7  114.07    0.94   9
   7  -4   9    2.27    0.45   9
   7  -2   8   30.87    0.66   9
   7  -1   7   15.66    0.57   9
   8  -8   9    2.94    0.30   9
   9  -9   8    3.73    0.27   9
   9  -5   8   12.56    0.49   9
   9  -3   7   24.22    0.62   9
  10  -5   7   34.23    0.62   9
  12  -6   5    0.18    0.24   9
   1  -6  11  216.61    1.39   9
   2  -8  11   14.26    0.58   9
   2  -6  11   47.40    0.78   9
   2  -3  10   18.12    0.53   9
   4 -11  10    9.10    0.33   9
   4  -2   9  111.30    1.02   9
   6 -13   8    0.38    0.11   9
   6 -13   8    0.08    0.06   9
   6  -3   9    3.50    0.46   9
   7 -10   9    1.69    0.29   9
   8  -2   7    1.20    0.43   9
  10  -3   6    0.57    0.37   9
  11  -9   6    3.42    0.21   9
  11  -2   4    1.53    0.30   9
  12  -8   5    4.73    0.21   9
  12  -4   4    3.49    0.35   9
  -1  -5  10  178.58    1.11   9
   0  -4  10   17.75    0.46   9
   2 -11  10    0.66    0.32   9
   2  -7  11   78.21    0.92   9
   2  -2   9  116.03    0.96   9
   3 -11  10   15.19    0.45   9
   3  -2   9  133.10    1.07   9
   4  -4  10   33.89    0.72   9
   5 -12   9    5.42    0.26   9
   6   0   6   98.80    0.89   9
   7 -12   8    4.60    0.24   9
   7  -5   9    1.64    0.48   9
   8  -1   6   28.31    0.58   9
   9  -2   6    1.82    0.40   9
   9  -1   5    0.66    0.39   9
  10  -2   5    3.64    0.39   9
  11  -8   6    0.13    0.23   9
  -1  -6  10    2.22    0.37   9
   1  -4  10    1.04    0.36   9
   3  -4  10    3.75    0.44   9
   4 -10  10    5.37    0.40   9
   5  -6  10    0.40    0.45   9
   6  -4   9    5.10    0.48   9
   6  -1   7    4.13    0.38   9
   7  -3   8  105.18    1.02   9
   9 -11   7    1.64    0.12   9
   9  -4   7   30.40    0.64   9
  10 -11   6    1.35    0.15   9
  11 -11   5    0.14    0.08   9
  11 -11   5    0.09    0.05   9
  13  -9   3    0.20    0.12   9
  13  -6   3   12.18    0.35   9
   0  -5  10   11.09    0.42   9
   4 -12   9    0.17    0.28   9
   4  -5  10    6.22    0.53   9
   4  -3   9   56.82    0.84   9
   5 -13   8    4.89    0.25   9
   5  -7  10   72.86    0.90   9
   5  -2   8   13.57    0.53   9
   7 -13   7    1.10    0.16   9
   7  -8   9    4.79    0.44   9
   7   0   5    3.39    0.31   9
   8 -12   7    0.71    0.16   9
   8  -5   8   -0.25    0.41   9
  10  -4   6   31.62    0.60   9
  12 -10   4    1.18    0.16   9
  12  -5   4    0.27    0.32   9
  13  -7   3    3.55    0.27   9
   1 -10  10    1.00    0.33   9
   1  -5  10   11.76    0.47   9
   2  -5  10   22.37    0.61   9
   3 -12   9   16.53    0.44   9
   3 -10  10   -0.41    0.36   9
   3  -3   9   45.29    0.72   9
   5 -14   7    3.96    0.19   9
   5 -11   9    0.49    0.32   9
   5  -1   7    0.34    0.32   9
   6  -5   9   24.40    0.64   9
   7  -4   8    8.39    0.58   9
   7  -2   7   19.91    0.57   9
   8  -9   8   23.73    0.52   9
   8  -3   7   81.22    0.91   9
   8   0   4   47.62    0.61   9
   9  -5   7    0.65    0.47   9
  11  -5   5    8.32    0.44   9
  11  -3   4    2.52    0.39   9
   0  -8  10   12.30    0.54   9
   0  -7  10   17.94    0.55   9
   1  -9  10   26.34    0.61   9
   1  -6  10    0.30    0.43   9
   2  -3   9   47.68    0.68   9
   3  -9  10    3.98    0.47   9
   3  -6  10   10.67    0.55   9
   4 -13   8    1.46    0.26   9
   4  -7  10    0.56    0.43   9
   6  -6   9    0.37    0.46   9
   6  -3   8    4.27    0.45   9
   7 -11   8    6.15    0.28   9
   7 -11   8    3.88    0.20   9
   8 -13   6    0.72    0.14   9
   9 -12   6    1.40    0.14   9
   9  -3   6   22.82    0.60   9
  10 -12   5    2.74    0.16   9
  10  -3   5   49.21    0.71   9
  11 -10   5    2.14    0.16   9
  11 -10   5    1.26    0.12   9
  12  -6   4   18.22    0.43   9
   1  -7  10    4.66    0.50   9
   2  -6  10  130.54    1.14   9
   4 -11   9    2.77    0.37   9
   4  -4   9    6.27    0.47   9
   8  -4   7   15.92    0.60   9
   9  -8   7    3.46    0.44   9
   9  -2   5  125.76    1.03   9
  10  -9   6    0.10    0.31   9
  10  -6   6    8.12    0.49   9
  11  -6   5   17.31    0.46   9
  12 -11   3    0.30    0.11   9
   1  -4   9  325.96    1.53   9
   5  -3   8  136.58    1.11   9
   6  -1   6   34.83    0.57   9
   8 -11   7    5.89    0.28   9
   9 -13   5    1.17    0.10   9
   9  -4   6    8.55    0.52   9
  10 -13   4    0.02    0.06   9
  10 -13   4   -0.01    0.04   9
  11  -4   4    1.08    0.41   9
   0  -5   9    4.37    0.40   9
   2  -4   9   42.94    0.67   9
   3 -11   9    0.17    0.34   9
   5 -12   8    1.40    0.23   9
   5  -7   9   19.74    0.66   9
   5  -6   9    3.86    0.50   9
   6 -14   6    2.78    0.19   9
   7  -9   8    8.14    0.48   9
   7  -6   8    0.45    0.45   9
   8  -5   7    9.87    0.56   9
  10  -4   5    1.15    0.40   9
  12  -5   3   12.67    0.46   9
  13  -9   2    8.22    0.26   9
  13  -6   2   -0.06    0.25   9
   4  -3   8    5.65    0.40   9
   5  -8   9  149.64    1.21   9
   6  -5   8    1.23    0.50   9
   7  -7   8    5.49    0.49   9
   7  -2   6    2.49    0.36   9
   8  -3   6    9.79    0.50   9
  11  -3   3    3.71    0.40   9
  12 -10   3    0.24    0.17   9
  13  -7   2   10.65    0.33   9
   1 -10   9   27.89    0.61   9
   1  -5   9   14.05    0.45   9
   2  -5   9    9.15    0.45   9
   3  -3   8  186.62    1.20   9
   4 -12   8   29.47    0.53   9
   4  -8   9    3.49    0.55   9
   4  -7   9    6.94    0.56   9
   4  -6   9   65.50    0.87   9
   5 -13   7    3.56    0.28   9
   5  -4   8    3.72    0.44   9
   6 -10   8   61.50    0.78   9
   7 -13   6   14.75    0.37   9
   7  -4   7  159.45    1.22   9
   8  -6   7    1.61    0.45   9
   8  -2   5    1.65    0.33   9
   9  -3   5    0.16    0.40   9
   9  -1   3    4.43    0.33   9
  10  -5   5   44.73    0.70   9
  10  -3   4   19.93    0.51   9
  12  -6   3   -0.03    0.38   9
  14  -8   0    0.79    0.17   9
   3 -12   8   15.03    0.48   9
   3  -9   9   13.17    0.60   9
   3  -6   9   18.53    0.55   9
   5 -14   6    1.64    0.23   9
   6 -12   7   12.59    0.42   9
   6  -2   6   13.04    0.48   9
   8  -7   7    4.03    0.47   9
   9 -12   5    8.23    0.29   9
   9  -6   6    3.42    0.46   9
   9  -2   4   54.43    0.69   9
  10 -10   5    0.85    0.26   9
  11 -12   3    1.37    0.10   9
  11 -10   4    0.37    0.21   9
  12  -8   3    3.02    0.32   9
  12  -7   3    2.10    0.35   9
  12  -4   2    2.65    0.32   9
   1  -9   9   20.98    0.53   9
   1  -7   9    3.27    0.42   9
   2  -7   9   17.51    0.62   9
   3  -8   9   17.96    0.56   9
   3  -7   9    8.64    0.48   9
   4 -13   7   27.42    0.52   9
   4  -4   8   23.34    0.56   9
   5  -5   8    6.88    0.48   9
   5  -3   7    4.28    0.36   9
   6  -8   8   94.05    1.00   9
   7  -5   7    2.40    0.49   9
   8 -13   5    5.59    0.28   9
   8  -4   6   86.03    0.94   9
  10 -12   4    0.30    0.14   9
  10 -12   4    0.30    0.09   9
  10  -9   5    2.36    0.42   9
  11  -9   4    3.71    0.33   9
  11  -4   3    5.31    0.45   9
  12 -11   2    0.03    0.17   9
  14 -10  -1    0.12    0.10   9
   2  -4   8   25.38    0.53   9
   3  -4   8   25.72    0.54   9
   4 -14   6   18.16    0.40   9
   4 -11   8    1.35    0.37   9
   5  -6   8  100.84    1.07   9
   6  -4   7    3.75    0.41   9
   7 -10   7   35.09    0.63   9
   7  -6   7    1.89    0.52   9
   8 -14   4    9.95    0.26   9
   8 -11   6    0.44    0.32   9
   9 -13   4   13.63    0.32   9
  10  -4   4   96.29    0.95   9
  11  -8   4    0.26    0.33   9
   4  -5   8   24.57    0.58   9
   5 -12   7   13.15    0.43   9
   5  -8   8    1.19    0.51   9
   5  -7   8   12.07    0.55   9
   5  -2   6    7.37    0.36   9
   6 -13   6    1.12    0.15   9
   6 -11   7   77.41    0.83   9
   7 -12   6    0.42    0.30   9
   7  -7   7    4.41    0.58   9
   7  -2   5  179.72    1.16   9
   8  -5   6   46.46    0.75   9
   8  -3   5   22.76    0.55   9
   9 -14   3    0.52    0.07   9
  11  -3   2    2.44    0.39   9
  12 -12   1    1.84    0.15   9
  13  -8   1    3.10    0.30   9
  13  -7   1    1.04    0.30   9
  14  -9  -1    2.93    0.20   9
   2 -11   8    4.19    0.40   9
   3  -5   8   74.31    0.84   9
   6  -5   7   20.68    0.59   9
   6  -3   6    0.21    0.39   9
   7  -4   6    2.48    0.39   9
   8 -10   6   20.36    0.53   9
   8  -6   6    7.14    0.54   9
   9  -5   5    3.45    0.46   9
   9  -3   4  204.54    1.28   9
  10 -11   4    0.36    0.20   9
  10 -11   4    0.24    0.13   9
  10  -5   4    2.04    0.45   9
  10  -3   3  212.74    1.28   9
  13 -11   0    4.85    0.18   9
  14  -8  -1    0.42    0.20   9
   2  -5   8  186.22    1.21   9
   3 -10   8    0.44    0.43   9
   4  -7   8   16.67    0.58   9
   5 -13   6   59.85    0.68   9
   7 -13   5   32.88    0.53   9
   8  -7   6    1.36    0.45   9
  12  -9   2    0.34    0.31   9
  12  -7   2    0.62    0.36   9
  12  -4   1    1.26    0.29   9
   0  -7   8    8.91    0.40   9
   1  -6   8   92.69    0.87   9
   2 -10   8   61.15    0.79   9
   3  -9   8    4.80    0.56   9
   4  -4   7   46.47    0.66   9
   5 -15   4    1.82    0.21   9
   6 -12   6   24.02    0.55   9
   6  -7   7    5.24    0.52   9
   6  -6   7  124.37    1.12   9
   7 -15   3   -0.05    0.11   9
   7 -15   3   -0.01    0.06   9
   7 -14   4    0.21    0.23   9
   7 -11   6   23.16    0.56   9
   8  -4   5    1.22    0.38   9
   9 -12   4    0.47    0.24   9
   9  -7   5   -0.84    0.50   9
  11  -6   3    4.97    0.41   9
  12  -8   2   73.22    0.73   9
  13 -10   0    1.96    0.23   9
  14 -10  -2    4.04    0.20   9
   1  -9   8   10.05    0.46   9
   2  -9   8    7.06    0.48   9
   2  -7   8    4.55    0.46   9
   3  -7   8    3.14    0.44   9
   3  -4   7  293.07    1.44   9
   4 -13   6    3.20    0.38   9
   5  -3   6    7.22    0.38   9
   6  -4   6    3.75    0.42   9
   7  -5   6   19.15    0.56   9
   7  -3   5   34.71    0.59   9
   8 -15   2    0.30    0.13   9
  10  -9   4    8.61    0.47   9
  10  -7   4    3.14    0.44   9
  10  -4   3   -0.01    0.43   9
  11 -13   1    0.12    0.10   9
  11 -13   1   -0.07    0.06   9
  11  -9   3    0.03    0.34   9
  11  -4   2    1.89    0.37   9
  12 -11   1   28.48    0.43   9
  13  -6   0    4.86    0.34   9
   1  -8   8   69.03    0.79   9
   2  -8   8   37.47    0.66   9
   4 -11   7  157.19    1.16   9
   5 -10   7  147.65    1.18   9
   7  -6   6    4.11    0.47   9
   8 -14   3    9.23    0.28   9
   8 -11   5    8.31    0.45   9
   8  -5   5   86.36    0.96   9
   9 -14   2    0.81    0.17   9
   9 -13   3    4.44    0.24   9
  10 -14   1    0.48    0.12   9
  10 -13   2   -0.11    0.16   9
  13  -9   0    2.48    0.25   9
  13  -8   0    0.50    0.30   9
  14  -9  -2    0.83    0.19   9
   3 -11   7    3.80    0.49   9
   5 -12   6   18.49    0.50   9
   5  -8   7   19.62    0.60   9
   6 -15   3    0.56    0.19   9
   6 -13   5    8.97    0.35   9
   7  -9   6    3.86    0.48   9
   7  -8   6    3.69    0.51   9
   7  -7   6    6.38    0.50   9
   8  -2   3    2.75    0.32   9
   9 -11   4    6.18    0.38   9
  11 -11   2    8.66    0.32   9
  11  -5   2    4.98    0.48   9
  12 -13  -1    1.66    0.13   9
  12 -12   0    1.18    0.13   9
  12 -12   0    0.48    0.09   9
  12 -10   1    0.48    0.30   9
  13 -12  -2    2.87    0.16   9
  13 -11  -1    1.01    0.15   9
   2 -11   7    3.21    0.41   9
   3  -5   7   71.26    0.77   9
   4 -10   7    1.33    0.41   9
   4  -6   7    1.09    0.36   9
   6 -14   4    1.73    0.26   9
   6  -5   6   14.08    0.50   9
   6  -3   5   18.20    0.45   9
   7  -4   5    8.05    0.45   9
   8  -6   5    2.96    0.45   9
   9  -2   2   27.47    0.48   9
  12  -9   1    1.65    0.35   9
   4  -9   7   16.08    0.55   9
   4  -7   7  206.25    1.35   9
   5 -13   5    9.95    0.45   9
   6  -6   6   65.27    0.84   9
   7 -13   4    6.43    0.37   9
   8  -8   5    2.78    0.47   9
   8  -4   4   58.50    0.78   9
   9 -10   4    0.16    0.43   9
   9  -6   4    0.60    0.40   9
  11 -12   1    1.11    0.21   9
  11 -10   2    5.25    0.38   9
  11  -6   2    2.00    0.42   9
  13 -10  -1   15.10    0.38   9
  14 -10  -3    1.74    0.15   9
  14 -10  -3    0.56    0.09   9
   1 -10   7   22.59    0.58   9
   3 -12   6   -0.01    0.43   9
   3  -6   7  305.24    1.53   9
   5 -14   4    1.90    0.33   9
   5  -5   6    6.20    0.45   9
   6 -16   1   -0.08    0.12   9
   6  -9   6   -0.52    0.46   9
   6  -8   6    7.51    0.55   9
   6  -7   6   64.31    0.86   9
   7 -15   2    3.81    0.16   9
   7 -14   3    1.46    0.29   9
   7 -11   5    3.39    0.46   9
   7  -5   5    0.45    0.36   9
   9 -15   0    0.79    0.13   9
   9 -12   3    1.65    0.26   9
   9 -12   3    0.86    0.16   9
  10 -12   2   11.46    0.35   9
  10  -4   2    4.08    0.43   9
  11 -13   0    1.16    0.15   9
  11  -9   2   21.29    0.53   9
  11  -7   2   42.78    0.67   9
  11  -4   1   21.44    0.51   9
  12 -11   0    0.03    0.24   9
  14  -9  -3    5.37    0.26   9
   1  -9   7   76.57    0.84   9
   2 -12   6    3.98    0.43   9
   2  -9   7   35.03    0.69   9
   2  -6   7   13.51    0.43   9
   4 -13   5   10.74    0.48   9
   6  -4   5    8.72    0.40   9
   7 -10   5    8.39    0.59   9
   8 -11   4    3.21    0.51   9
  10 -14   0    1.47    0.15   9
  10 -13   1    1.83    0.22   9
  12 -13  -2   -0.22    0.12   9
  12 -12  -1    5.58    0.27   9
  12  -5   0   35.49    0.58   9
  13 -11  -2    5.78    0.25   9
  13  -8  -1   61.02    0.71   9
  13  -7  -1    7.42    0.36   9
   2  -8   7    5.86    0.41   9
   4 -15   3   30.78    0.49   9
   4 -14   4    1.99    0.35   9
   5 -10   6    5.90    0.51   9
   5  -6   6    8.71    0.44   9
   6 -13   4   24.70    0.56   9
   7 -16   0    0.53    0.10   9
   7 -16   0    0.11    0.05   9
   7  -9   5    0.40    0.52   9
   7  -6   5   37.21    0.68   9
   8  -5   4    3.71    0.39   9
   8  -3   3   68.51    0.72   9
   9 -14   1    1.65    0.20   9
  10 -11   2   19.03    0.51   9
  11 -11   1    8.25    0.37   9
  11  -5   1    0.44    0.44   9
  12 -10   0    7.54    0.36   9
  12  -6   0   76.43    0.84   9
  13 -12  -3    4.13    0.18   9
   5 -16   1    6.98    0.23   9
   5  -9   6   34.30    0.69   9
   5  -8   6   10.65    0.50   9
   5  -7   6  208.54    1.35   9
   6 -15   2   -0.04    0.22   9
   6 -14   3    1.23    0.32   9
   7  -8   5   14.13    0.56   9
   7  -7   5   17.09    0.57   9
   9  -5   3    3.47    0.42   9
  10 -15  -2    0.17    0.08   9
  10  -5   2    5.45    0.42   9
  11 -14  -2    0.47    0.13   9
  12  -9   0   62.40    0.74   9
  14 -11  -5    0.68    0.13   9
  14 -10  -4    0.45    0.15   9
  14 -10  -4    0.30    0.09   9
   3 -14   4    0.53    0.28   9
   4 -10   6   11.02    0.52   9
   4  -6   6  118.19    0.98   9
   6  -5   5   60.30    0.74   9
   7  -4   4    0.18    0.32   9
   8 -12   3    3.87    0.43   9
   8  -7   4   23.00    0.66   9
   9  -6   3    2.65    0.46   9
  10 -10   2   21.48    0.58   9
  11 -13  -1    1.31    0.19   9
  11 -12   0    4.49    0.29   9
  11 -10   1   84.97    0.84   9
  11  -6   1  163.83    1.17   9
  13 -10  -2    2.51    0.22   9
  13 -10  -2    1.40    0.14   9
  14  -9  -4    2.68    0.23   9
   3 -10   6    0.80    0.49   9
   4  -9   6    4.70    0.44   9
   5 -13   4    2.92    0.39   9
   5 -11   5   22.98    0.67   9
   6 -16   0   14.60    0.29   9
   6  -6   5   46.97    0.71   9
   7 -15   1    0.41    0.21   9
   8  -8   4   44.59    0.76   9
   8  -4   3    4.35    0.35   9
   9 -15  -1    1.66    0.16   9
   9 -12   2    2.27    0.34   9
   9  -9   3    0.09    0.47   9
   9  -7   3    3.71    0.51   9
  10 -12   1   -0.15    0.27   9
  11  -9   1    0.93    0.40   9
  11  -8   1    4.91    0.50   9
  11  -7   1   25.20    0.57   9
  11  -4   0   -0.18    0.29   9
  12 -11  -1    6.58    0.30   9
  12 -11  -1    3.46    0.21   9
  12  -5  -1    2.54    0.40   9
   1 -10   6    4.98    0.44   9
   2 -10   6   69.97    0.86   9
   3 -12   5   10.26    0.53   9
   3  -6   6  126.81    0.97   9
   5 -14   3   12.73    0.45   9
   6  -9   5   59.10    0.85   9
   6  -8   5   59.86    0.83   9
   6  -7   5   40.85    0.70   9
   7 -16  -1    8.17    0.22   9
   7  -5   4   29.83    0.57   9
   9  -8   3   51.52    0.78   9
   9  -4   2    6.97    0.37   9
  10 -14  -1   -0.11    0.13   9
  10 -14  -1    0.03    0.08   9
  10 -13   0   11.87    0.34   9
  10  -7   2   26.80    0.63   9
  10  -4   1    8.74    0.39   9
  12 -13  -3   12.23    0.25   9
  12 -12  -2   15.36    0.35   9
  13 -12  -4    2.95    0.16   9
  13  -8  -2    0.15    0.29   9
  14 -11  -6    3.79    0.16   9
  14 -10  -5    0.05    0.17   9
   2 -12   5   13.48    0.54   9
   3  -9   6   47.41    0.73   9
   3  -8   6    0.10    0.36   9
   3  -7   6  198.49    1.23   9
   4 -15   2    0.29    0.28   9
   7  -6   4   29.35    0.64   9
   9 -14   0    0.09    0.10   9
   9 -11   2    9.83    0.54   9
  10 -15  -3    9.67    0.23   9
  10 -11   1    3.25    0.44   9
  11 -14  -3    5.16    0.21   9
  11  -5   0   72.85    0.82   9
  12 -10  -1    0.06    0.30   9
  12  -6  -1  135.33    1.06   9
   1  -9   6  115.07    0.95   9
   2  -9   6    6.38    0.39   9
   2  -7   6   58.67    0.68   9
   4 -14   3    1.02    0.37   9
   4 -11   5   27.79    0.63   9
   5 -16   0    0.07    0.18   9
   5  -6   5   38.23    0.61   9
   6 -15   1   17.01    0.41   9
   6 -13   3    3.04    0.40   9
   6 -11   4   10.30    0.56   9
   7 -12   3    3.17    0.44   9
   7  -8   4   20.05    0.64   9
   7  -7   4   26.51    0.66   9
   8  -3   2    0.16    0.25   9
   9  -5   2  139.92    1.11   9
   9  -3   1   11.48    0.39   9
  10  -5   1   59.15    0.78   9
  10  -3   0   37.89    0.54   9
  11 -12  -1    4.27    0.35   9
  11 -10   0   23.49    0.59   9
  12  -9  -1  134.17    1.00   9
  12  -7  -1   31.43    0.64   9
  13 -10  -3   39.52    0.51   9
  14  -9  -5    8.24    0.31   9
   1  -8   6   29.65    0.52   9
   3 -14   3  102.06    0.92   9
   3 -11   5   -0.11    0.49   9
   5  -8   5  192.08    1.31   9
   5  -7   5    1.16    0.36   9
   8 -12   2   34.02    0.64   9
   8  -6   3    1.41    0.40   9
   9 -15  -2    2.27    0.17   9
   9 -10   2   10.88    0.55   9
  10 -12   0    3.31    0.38   9
  11 -13  -2   12.56    0.29   9
  11  -6   0   10.45    0.52   9
  12 -13  -4    1.22    0.15   9
  12 -11  -2    0.49    0.28   9
  13 -12  -5    1.25    0.17   9
  13 -11  -4    3.04    0.25   9
  14 -10  -6    9.47    0.27   9
   4 -10   5    1.23    0.42   9
   6 -16  -1    2.02    0.19   9
   6 -10   4   60.48    0.84   9
   6  -5   4   11.92    0.40   9
   7 -15   0    4.24    0.25   9
   7 -11   3   27.57    0.70   9
   8 -16  -3    0.03    0.10   9
   8 -15  -1    4.38    0.24   9
   8  -9   3    7.04    0.51   9
   8  -8   3    9.74    0.51   9
   8  -7   3   74.87    0.87   9
   9 -12   1    2.99    0.42   9
   9  -9   2   20.50    0.63   9
   9  -6   2   39.01    0.68   9
  10 -14  -2    6.73    0.25   9
  10 -13  -1    8.73    0.35   9
  10  -9   1   14.03    0.60   9
  10  -6   1   87.70    0.92   9
  11  -8   0   13.22    0.56   9
  11  -7   0  155.04    1.16   9
  11  -4  -1  125.22    0.95   9
  12 -12  -3    0.38    0.23   9
  12  -5  -2    0.68    0.38   9
  13  -8  -3    8.37    0.42   9
   3 -10   5  126.40    1.09   9
   4 -12   4   30.91    0.66   9
   4  -9   5  295.95    1.59   9
   4  -7   5   98.91    0.93   9
   4  -6   5   30.94    0.55   9
   5 -15   1    0.34    0.29   9
   5 -14   2    1.83    0.39   9
   5 -11   4   67.70    0.88   9
   6 -12   3   41.48    0.76   9
   6  -9   4    2.55    0.51   9
   7 -16  -2    0.23    0.12   9
   7 -16  -2   -0.08    0.06   9
   8 -14   0   20.32    0.49   9
   8  -4   2  140.78    0.99   9
   9 -14  -1    3.73    0.26   9
   9 -13   0   16.60    0.44   9
   9  -7   2    9.51    0.50   9
  10 -15  -4    0.38    0.11   9
  10  -7   1    3.83    0.42   9
  12 -10  -2   29.57    0.54   9
  14  -9  -6    1.20    0.21   9
   3 -12   4    4.01    0.50   9
   4  -8   5    5.00    0.41   9
   5 -16  -1    2.34    0.23   9
   6  -8   4   27.28    0.62   9
   6  -7   4    9.21    0.45   9
   7 -10   3   64.50    0.92   9
   7  -5   3    1.50    0.32   9
   8 -11   2    7.19    0.53   9
   9  -4   1  112.94    0.90   9
  10 -11   0   -0.01    0.42   9
  11 -12  -2    1.95    0.35   9
  12  -9  -2    8.95    0.47   9
  12  -6  -2   80.68    0.84   9
  13 -12  -6    0.16    0.14   9
  13 -10  -4    2.89    0.27   9
  14 -10  -7    1.10    0.17   9
   1 -10   5   12.28    0.47   9
   2 -10   5   45.81    0.67   9
   3  -9   5    6.15    0.41   9
   3  -7   5   86.94    0.83   9
   4 -15   1    3.62    0.27   9
   4 -14   2   31.93    0.62   9
   6 -15   0    0.16    0.25   9
   7  -6   3   96.40    0.92   9
   8 -16  -4    0.36    0.11   9
   9 -15  -3    1.18    0.17   9
  11 -13  -3    0.05    0.11   9
  11 -10  -1  134.67    1.06   9
  11  -5  -1   69.14    0.77   9
  12 -13  -5    4.40    0.18   9
  12 -11  -3   10.74    0.38   9
  12  -7  -2   68.23    0.78   9
  13 -11  -5    0.57    0.21   9
  13  -9  -4   37.15    0.58   9
   3 -13   3    2.61    0.48   9
   4 -16  -1    0.20    0.19   9
   4 -11   4    0.04    0.43   9
   5 -12   3    4.29    0.48   9
   5  -9   4   52.09    0.79   9
   6 -16  -2    4.41    0.23   9
   6 -14   1    1.68    0.35   9
   6 -11   3   10.18    0.51   9
   7 -16  -3    0.89    0.16   9
   7  -9   3    0.26    0.42   9
   7  -8   3   70.77    0.87   9
   8 -15  -2    6.73    0.27   9
   8 -10   2   85.64    0.96   9
   9 -12   0    1.72    0.49   9
   9 -10   1   22.65    0.62   9
   9  -5   1    3.90    0.35   9
  10 -15  -5    6.91    0.20   9
  10 -14  -3    4.21    0.25   9
  10  -5   0   82.90    0.82   9
  11 -14  -5    3.54    0.18   9
  11  -9  -1   18.89    0.57   9
  11  -6  -1   15.33    0.54   9
  12 -12  -4    5.10    0.26   9
  13  -8  -4    4.79    0.39   9
   1  -9   5    1.64    0.30   9
   2 -13   3   81.53    0.89   9
   3 -11   4   45.07    0.75   9
   5 -15   0   16.84    0.45   9
   5  -8   4    2.60    0.39   9
   7 -14   0    2.62    0.37   9
   7 -13   1    2.75    0.43   9
   8 -13   0   22.98    0.60   9
   8  -9   2    5.25    0.48   9
   8  -6   2  115.50    0.99   9
   9 -14  -2    0.61    0.23   9
   9  -6   1   25.03    0.61   9
  10 -13  -2    0.30    0.25   9
  10  -9   0    3.46    0.50   9
  10  -6   0  154.88    1.16   9
  11 -11  -2   51.29    0.71   9
  12 -10  -3    7.60    0.43   9
  13 -12  -7    2.11    0.15   9
  13 -12  -7    0.87    0.09   9
  13 -10  -5   29.90    0.50   9
   4 -12   3   11.30    0.57   9
   4 -10   4   85.28    0.92   9
   5 -16  -2    3.12    0.24   9
   5 -14   1   27.05    0.60   9
   6 -12   2   39.74    0.76   9
   6 -10   3   18.05    0.58   9
   8 -16  -5    0.04    0.09   9
   8  -8   2   20.54    0.58   9
   8  -7   2    2.62    0.38   9
   9 -15  -4    2.26    0.19   9
   9  -8   1   45.83    0.74   9
   9  -7   1   32.01    0.63   9
  10 -15  -6    0.89    0.11   9
  10  -8   0  321.83    1.67   9
  10  -7   0    0.92    0.40   9
  11 -13  -4   12.16    0.35   9
  11 -12  -3   28.48    0.56   9
  12 -13  -6    6.77    0.21   9
  13 -11  -6   10.67    0.30   9
   2 -11   4    4.83    0.41   9
   4 -15   0    7.46    0.39   9
   6 -15  -1   25.53    0.50   9
   6  -6   3   83.08    0.80   9
   7 -16  -4    0.09    0.14   9
   8  -4   1  149.85    0.98   9
   9  -4   0   55.89    0.67   9
  10 -14  -4   13.87    0.35   9
  10  -4  -1   26.73    0.48   9
  12 -12  -5   10.12    0.33   9
  12 -11  -4    0.51    0.29   9
  12  -8  -3    2.44    0.44   9
  12  -7  -3   48.05    0.71   9
  12  -6  -3   31.37    0.56   9
  13 -12  -8    0.09    0.10   9
  13 -12  -8    0.11    0.06   9
  13  -9  -5    0.71    0.33   9
   3 -12   3   91.13    0.98   9
   3 -10   4    1.31    0.37   9
   4 -13   2   14.34    0.58   9
   4  -8   4  132.82    1.03   9
   4  -7   4  261.62    1.35   9
   6 -16  -3    0.75    0.15   9
   6 -16  -3    0.32    0.10   9
   6 -14   0    8.58    0.47   9
   6  -8   3   19.93    0.55   9
   6  -7   3  101.29    0.92   9
   7 -15  -2    3.70    0.30   9
   7 -12   1    2.88    0.48   9
   7 -10   2    2.32    0.48   9
  10 -15  -7    3.89    0.19   9
  10 -12  -2   62.32    0.76   9
  12 -13  -7   13.00    0.27   9
  13 -12  -9    0.47    0.10   9
  13  -8  -5    7.82    0.37   9
   2 -10   4    5.02    0.40   9
   3 -15   0   22.44    0.47   9
   3  -9   4  131.60    1.05   9
   4 -14   1    0.21    0.36   9
   4 -11   3    5.72    0.57   9
   5 -12   2   91.70    1.00   9
   5 -10   3   12.71    0.51   9
   6 -11   2    8.53    0.51   9
   7  -9   2   47.64    0.76   9
   7  -6   2    4.55    0.41   9
   8 -10   1    8.88    0.55   9
   8  -5   1  145.94    1.02   9
   9 -14  -3   19.05    0.41   9
   9 -12  -1   13.14    0.53   9
   9 -10   0   50.30    0.78   9
  10 -10  -1   12.88    0.55   9
  10  -5  -1  122.29    0.97   9
  11 -14  -7    9.64    0.26   9
  11 -13  -5    4.68    0.29   9
  11 -11  -3    0.21    0.43   9
  11  -6  -2   25.03    0.57   9
  12 -10  -4    7.38    0.43   9
  13 -11  -7    0.69    0.17   9
  13 -11  -7    0.19    0.10   9
  13 -10  -6    4.58    0.26   9
   1 -10   4    0.34    0.28   9
   3  -8   4   25.51    0.52   9
   5 -16  -3    9.60    0.33   9
   5 -15  -1   32.46    0.53   9
   5  -9   3    0.75    0.45   9
   7 -16  -5    0.01    0.13   9
   7  -8   2   51.34    0.75   9
   7  -7   2  114.78    0.99   9
   8 -13  -1    8.44    0.46   9
   8  -9   1    4.14    0.46   9
   9  -5   0   94.54    0.84   9
  10 -14  -5    1.73    0.23   9
  10  -9  -1   26.54    0.62   9
  11 -12  -4    2.55    0.34   9
  11  -7  -2   75.92    0.84   9
  12 -13  -8    2.41    0.16   9
  12 -12  -6   20.24    0.41   9
  12 -11  -5   20.20    0.48   9
  13  -9  -6   14.77    0.45   9
   2 -13   2    3.14    0.43   9
   2  -9   4   15.37    0.43   9
   3 -11   3   46.95    0.75   9
   5 -14   0   11.03    0.51   9
   5  -7   3    0.71    0.33   9
   6 -16  -4    5.05    0.23   9
   6 -16  -4    0.97    0.11   9
   6 -15  -2   11.19    0.41   9
   6 -10   2    5.40    0.53   9
   7 -11   1    0.22    0.44   9
   8 -15  -4    2.47    0.25   9
   8  -8   1  147.16    1.15   9
   9  -9   0   88.03    0.96   9
   9  -8   0  119.03    1.09   9
   9  -6   0   39.69    0.63   9
  10  -7  -1   33.28    0.66   9
  10  -6  -1    0.30    0.34   9
  11 -14  -8    1.00    0.12   9
  12 -13  -9    0.18    0.11   9
  12  -6  -4   31.58    0.61   9
  13 -11  -8    0.97    0.20   9
   1  -9   4    4.09    0.30   9
   4 -15  -1   42.23    0.60   9
   4 -10   3    2.82    0.42   9
   5 -11   2  114.27    1.09   9
   6 -12   1    8.67    0.50   9
   7 -16  -6    2.37    0.18   9
   7 -15  -3    1.35    0.24   9
   7 -15  -3    0.41    0.15   9
   8 -11   0   58.54    0.83   9
   9 -15  -6    0.75    0.14   9
   9 -14  -4    0.44    0.26   9
   9 -11  -1   18.76    0.59   9
   9  -7   0    8.30    0.43   9
  10 -13  -4   -0.51    0.29   9
  10 -12  -3   -0.15    0.40   9
  10  -4  -2   25.86    0.48   9
  11 -14  -9    1.19    0.11   9
  11 -13  -6   18.43    0.40   9
  12  -7  -4   16.55    0.49   9
  13 -10  -7    5.28    0.27   9
  13 -10  -7    2.25    0.18   9
   2 -11   3    4.22    0.39   9
   4 -13   1   21.61    0.64   9
   4  -9   3   26.87    0.56   9
   5 -16  -4    1.43    0.23   9
   6 -16  -5   -0.02    0.16   9
   6 -14  -1    3.48    0.40   9
   6  -9   2    7.91    0.47   9
   7 -10   1    6.09    0.48   9
   9 -13  -3    4.84    0.47   9
   9  -4  -1  254.06    1.24   9
  10 -14  -6    3.67    0.22   9
  11 -11  -4   33.71    0.65   9
  11  -5  -3    1.41    0.30   9
  12 -12  -7    1.42    0.21   9
  12 -12  -7    0.62    0.13   9
  12 -11  -6    2.69    0.35   9
  12 -10  -5    1.26    0.33   9
   3 -12   2   42.70    0.71   9
   3 -10   3    5.21    0.39   9
   4  -8   3    3.47    0.35   9
   6 -11   1   17.38    0.66   9
   6  -8   2   26.82    0.56   9
   6  -7   2   15.91    0.45   9
   6  -6   2   46.15    0.60   9
   7 -16  -7    2.11    0.17   9
   7 -14  -2    3.68    0.40   9
   8 -15  -5    1.31    0.23   9
   8 -13  -2   20.72    0.58   9
   8 -10   0   38.44    0.72   9
   9 -15  -7    0.19    0.13   9
  11 -12  -5   14.40    0.44   9
  11  -8  -3   63.15    0.83   9
  13 -11 -11    0.17    0.11   9
  13 -11 -10    1.10    0.17   9
  13 -10  -8    4.77    0.31   9
  13  -9  -7    1.70    0.30   9
   2 -12   2   78.96    0.89   9
   3 -13   1   -0.25    0.45   9
   4 -16  -4    0.47    0.22   9
   4 -11   2    0.15    0.42   9
   5 -12   1    3.57    0.45   9
   5 -10   2   11.38    0.49   9
   6 -16  -6    0.53    0.17   9
   6 -15  -3   12.16    0.40   9
   7 -15  -4    1.72    0.29   9
   7  -9   1    1.49    0.42   9
   8  -5   0   32.28    0.55   9
   9  -9  -1    4.94    0.56   9
   9  -5  -1   21.62    0.48   9
  10 -13  -5   17.31    0.46   9
  10  -9  -2   47.52    0.75   9
  11  -7  -3   46.98    0.70   9
  12 -12  -8    2.98    0.24   9
  13  -8  -7   15.10    0.42   9
   2 -13   1   21.58    0.59   9
   3  -9   3    9.41    0.39   9
   4 -15  -2    7.72    0.42   9
   5 -16  -5    7.35    0.27   9
   5 -13   0  101.37    1.01   9
   6 -12   0  279.77    1.63   9
   7 -11   0  131.18    1.14   9
   7  -8   1  136.30    1.09   9
   7  -7   1  399.11    1.72   9
   7  -6   1  155.63    1.05   9
   8 -11  -1   87.34    0.99   9
   8  -8   0   50.48    0.76   9
   8  -6   0  125.00    0.98   9
   9 -15  -9    0.46    0.10   9
   9 -15  -8    0.46    0.11   9
   9 -15  -8    0.33    0.07   9
   9 -11  -2   10.33    0.53   9
  10 -12  -4   29.78    0.59   9
  10  -8  -2   63.23    0.82   9
  10  -7  -2    2.98    0.41   9
  10  -6  -2   40.16    0.61   9
  12 -11  -7    6.35    0.37   9
  12 -10  -6    4.98    0.40   9
  12  -8  -5    7.64    0.43   9
  12  -7  -5   21.00    0.55   9
  12  -6  -5   28.63    0.54   9
  13 -10  -9    4.98    0.31   9
  13  -9  -8    2.18    0.32   9
   1 -10   3    3.68    0.32   9
   3  -8   3   10.56    0.38   9
   4 -12   1   21.16    0.67   9
   6 -14  -2   64.52    0.79   9
   6 -13  -1   91.31    0.99   9
   7 -14  -3    6.66    0.45   9
   8 -15  -6    3.69    0.20   9
   8  -7   0  240.89    1.37   9
   9 -13  -4   48.51    0.70   9
   9  -8  -1  159.99    1.20   9
   9  -7  -1   21.50    0.55   9
   9  -6  -1  102.20    0.89   9
  10 -14  -8    0.57    0.16   9
  10 -10  -3    2.04    0.49   9
  11 -11  -5    2.40    0.39   9
  11  -9  -4   38.79    0.72   9
   2  -9   3  127.17    0.94   9
   4 -13   0   51.27    0.84   9
   4 -10   2   10.24    0.47   9
   5 -15  -3    5.98    0.31   9
   5 -11   1   27.31    0.62   9
   5  -7   2  413.55    1.64   9
   6 -15  -4    0.47    0.33   9
   7 -12  -1   70.90    0.90   9
   7 -10   0   10.57    0.52   9
   8 -13  -3   44.65    0.72   9
   8 -12  -2   22.49    0.64   9
   9 -14  -6    0.49    0.27   9
   9 -10  -2   32.71    0.74   9
  10  -4  -3   55.00    0.62   9
  11  -5  -4    3.89    0.31   9
  12 -12 -11    1.91    0.16   9
  12 -12 -10    0.61    0.15   9
  13 -10 -10    3.50    0.26   9
  13  -8  -8   22.72    0.46   9
   2 -11   2   28.77    0.61   9
   8 -15  -7    9.91    0.27   9
   8 -15  -7    1.92    0.15   9
   8 -10  -1    8.93    0.51   9
  10 -14 -10    1.70    0.14   9
  10 -14  -9    1.47    0.14   9
  10 -12  -5    3.94    0.48   9
  10  -9  -3   79.63    0.94   9
  11 -13  -9    0.88    0.16   9
  11 -12  -7   29.32    0.54   9
  11  -8  -4  166.40    1.21   9
  11  -7  -4  125.21    1.03   9
  11  -6  -4   31.96    0.57   9
  12 -11  -8    0.03    0.26   9
  12  -8  -6   18.02    0.54   9
  13 -10 -12    0.62    0.14   9
  13 -10 -11    5.27    0.24   9
  13  -9  -9    3.52    0.30   9
   3 -13   0   41.35    0.75   9
   3 -10   2   -0.11    0.32   9
   4 -15  -3   13.01    0.42   9
   4  -9   2   16.80    0.49   9
   5 -14  -2    1.94    0.41   9
   5 -13  -1    0.54    0.51   9
   5 -10   1   19.27    0.58   9
   6 -11   0   34.57    0.69   9
   6  -8   1   64.31    0.75   9
   6  -7   1  242.74    1.31   9
   7 -15  -6    7.47    0.36   9
   8 -14  -5    3.48    0.35   9
   9 -13  -5   16.75    0.52   9
   9 -11  -3    1.01    0.52   9
   9  -9  -2   56.67    0.84   9
  11 -13 -11    0.12    0.09   9
  11 -13 -10    9.42    0.23   9
  12  -7  -6   35.60    0.63   9
  13  -9 -10    1.78    0.26   9
  13  -8  -9    2.41    0.31   9
   2 -12   1    0.97    0.43   9
   3 -15  -3    1.34    0.36   9
   4 -16  -7   -0.02    0.12   9
   4 -16  -7   -0.01    0.06   9
   4 -11   1    4.73    0.49   9
   4  -8   2   66.12    0.72   9
   5 -15  -4   25.33    0.49   9
   6 -15  -5    7.50    0.38   9
   6 -14  -3    6.55    0.44   9
   6 -12  -1   68.62    0.92   9
   7 -14  -4    0.15    0.38   9
   7  -8   0  124.50    1.02   9
   8 -15 -10    0.32    0.08   9
   8  -9  -1  313.40    1.65   9
   9 -14  -7   12.04    0.33   9
   9 -14  -7    4.45    0.21   9
   9  -5  -2    4.69    0.37   9
  10 -13  -7   19.23    0.43   9
  10  -8  -3    1.16    0.41   9
  10  -7  -3   30.17    0.62   9
  10  -6  -3    0.89    0.33   9
  11  -9  -5    4.27    0.50   9
   2 -13   0   35.55    0.65   9
   2 -10   2   16.88    0.49   9
   3  -9   2   29.28    0.57   9
   5  -9   1   65.53    0.80   9
   6 -13  -2   -0.15    0.44   9
   6 -10   0  176.19    1.27   9
   7 -15  -7    7.55    0.33   9
   7 -12  -2   24.52    0.64   9
   7  -7   0   53.72    0.67   9
   7  -6   0  110.35    0.86   9
   8 -13  -4    4.15    0.47   9
   8 -12  -3    3.19    0.48   9
   8  -8  -1   35.88    0.65   9
   8  -7  -1  116.99    1.00   9
   8  -6  -1    7.98    0.41   9
   9 -14  -8    0.10    0.23   9
   9  -8  -2   84.17    0.90   9
   9  -7  -2  134.64    1.05   9
   9  -6  -2    0.33    0.30   9
  10 -10  -4   62.73    0.83   9
  13  -9 -11    0.46    0.23   9
   3 -11   1   16.11    0.56   9
   4 -15  -4    2.70    0.38   9
   4 -12   0  151.55    1.22   9
   5 -11   0  106.11    1.02   9
   7 -10  -1   48.14    0.77   9
   8 -10  -2    5.53    0.54   9
  10 -13  -8    3.83    0.28   9
  11 -11  -7   10.36    0.45   9
  11  -8  -5   45.30    0.72   9
  11  -7  -5    5.60    0.46   9
  11  -6  -5   37.08    0.63   9
  12 -11 -13    2.52    0.15   9
  12 -11 -11    2.06    0.22   9
  12  -8  -7    3.23    0.38   9
   1 -10   2   36.15    0.55   9
   4 -10   1    3.25    0.40   9
   5 -15  -5   18.39    0.44   9
   5 -14  -3   15.01    0.51   9
   5  -8   1    2.40    0.31   9
   6 -15  -6    7.47    0.31   9
   6 -15  -6    2.93    0.20   9
   6 -14  -4    2.37    0.46   9
   6  -9   0   41.36    0.67   9
   7 -15  -8    6.32    0.28   9
   7 -14  -5    2.93    0.40   9
   9 -11  -4   70.88    0.94   9
  10  -9  -4  123.60    1.09   9
  12 -11 -12    0.09    0.12   9
  12 -11 -12    0.06    0.07   9
  12 -10  -9    8.54    0.40   9
  12  -7  -7   69.03    0.75   9
   3 -13  -1  161.63    1.27   9
   5 -12  -1   29.76    0.69   9
   7 -11  -2   19.79    0.61   9
   7  -9  -1   19.65    0.56   9
   8 -14  -7    3.10    0.31   9
   8 -11  -3    5.08    0.50   9
   9 -14 -11    1.30    0.14   9
   9 -14 -11    0.34    0.08   9
   9  -9  -3   41.46    0.71   9
  10 -13  -9    3.70    0.23   9
  10 -10  -5   11.89    0.57   9
  10  -8  -4   56.15    0.79   9
  10  -5  -4   46.63    0.62   9
  11 -12 -13    0.42    0.12   9
  11 -12 -10    0.83    0.24   9
  11 -11  -8   20.14    0.54   9
  11  -9  -6   11.24    0.50   9
   3 -10   1   69.37    0.81   9
   4 -11   0   18.81    0.57   9
   4  -9   1  275.32    1.41   9
   5 -10   0  103.68    0.97   9
   6 -15  -7    9.51    0.32   9
   6 -13  -3    4.74    0.49   9
   6 -12  -2    4.44    0.48   9
   6  -8   0   10.29    0.42   9
   7 -12  -3    3.63    0.51   9
   8 -12  -4   57.40    0.84   9
   8  -9  -2    4.98    0.47   9
  10 -13 -12    2.98    0.17   9
  10 -13 -11    0.97    0.16   9
  10  -7  -4  101.73    0.93   9
  10  -6  -4   28.52    0.53   9
  11 -12 -12    1.70    0.16   9
  11 -12 -11   27.20    0.42   9
  12 -10 -14    0.50    0.11   9
  12 -10 -10    1.46    0.27   9
  12  -8  -8    9.50    0.44   9
   1 -11   1    3.78    0.36   9
   2 -13  -1    6.82    0.43   9
   2 -12   0    5.18    0.40   9
   4 -13  -2    2.24    0.52   9
   5 -14  -4    0.98    0.44   9
   6 -15  -8    0.96    0.26   9
   6 -14  -5    0.41    0.41   9
   6  -7   0   35.37    0.54   9
   7  -8  -1   97.63    0.91   9
   8  -8  -2   31.56    0.61   9
   9  -7  -3   17.02    0.55   9
   9  -5  -3   67.15    0.68   9
  10 -12  -8   27.99    0.60   9
  11  -8  -6    0.57    0.41   9
  12 -10 -11    4.03    0.30   9
  12  -9  -9   27.53    0.54   9
  12  -7  -8    3.22    0.39   9
   5 -11  -1  419.82    1.92   9
   6 -15 -10    1.83    0.18   9
   7 -10  -2    1.01    0.45   9
   7  -7  -1   22.70    0.50   9
   8 -14  -9   -0.18    0.23   9
   8 -13  -6    3.39    0.43   9
   8  -7  -2    3.91    0.37   9
   8  -6  -2  132.86    0.97   9
   9 -11  -5   63.57    0.85   9
  11 -11  -9   14.79    0.42   9
  11  -9  -7   50.21    0.76   9
  11  -7  -6   58.85    0.75   9
  11  -6  -6    5.83    0.39   9
  12 -10 -13    0.33    0.15   9
  12 -10 -13    0.17    0.08   9
  12 -10 -12    4.05    0.24   9
   2 -10   1    0.44    0.30   9
   3 -11   0  147.70    1.12   9
   3  -9   1   24.67    0.49   9
   4 -10   0   10.20    0.50   9
   5 -12  -2    1.21    0.48   9
   6 -13  -4    0.60    0.52   9
   6 -11  -2    5.44    0.57   9
   7 -14  -7    3.16    0.37   9
   8 -14 -12    1.25    0.12   9
   8 -14 -12    0.21    0.06   9
   8 -14 -10    1.02    0.20   9
   8 -12  -5   69.47    0.90   9
   8 -11  -4   20.27    0.62   9
   9  -9  -4  143.44    1.20   9
  10 -12  -9    0.63    0.38   9
  10 -10  -6   28.59    0.63   9
  10  -8  -5   64.02    0.84   9
  11 -11 -14    5.05    0.18   9
   2 -15  -6    0.19    0.25   9
   3 -15  -6   20.32    0.44   9
   3 -13  -2    8.83    0.53   9
   4 -15  -7    1.23    0.27   9
   5 -15 -10    0.39    0.14   9
   5 -15  -9    2.39    0.23   9
   6 -14  -6    2.45    0.39   9
   6  -9  -1  180.09    1.22   9
   7 -11  -3    3.39    0.50   9
   7  -9  -2  381.89    1.79   9
   8  -9  -3   76.07    0.88   9
   9 -13  -9    0.10    0.22   9
   9 -13  -9    0.01    0.14   9
  10 -12 -14    2.49    0.14   9
  10  -7  -5   10.86    0.51   9
  11 -11 -11    9.25    0.37   9
  11  -8  -7    5.55    0.45   9
  12  -9 -14    1.53    0.18   9
  12  -9 -11   37.36    0.60   9
  12  -7  -9   34.85    0.58   9
   1 -10   1   19.51    0.44   9
   2 -13  -2   89.87    0.97   9
   2 -11   0   15.57    0.49   9
   3 -15  -7    0.83    0.27   9
   4 -15  -8    1.46    0.24   9
   4 -11  -1    3.26    0.50   9
   9 -13 -13    0.09    0.09   9
   9 -13 -13    0.11    0.05   9
   9 -11  -6   35.87    0.70   9
   9 -10  -5  107.25    1.04   9
   9  -8  -4    2.54    0.39   9
  10  -9  -6    1.85    0.49   9
  10  -6  -5    3.17    0.33   9
  10  -5  -5  124.18    0.90   9
  11 -11 -13    0.36    0.17   9
  11 -11 -12   16.12    0.37   9
  11  -9  -8    4.42    0.46   9
  12  -9 -13   28.45    0.45   9
  12  -9 -12    5.87    0.34   9
   1 -13  -2   51.96    0.76   9
   2 -12  -1   18.45    0.54   9
   3 -15 -10    2.96    0.19   9
   3 -15  -8   13.89    0.37   9
   4 -13  -3   71.06    0.90   9
   4  -9   0   21.32    0.50   9
   5 -13  -4    3.45    0.52   9
   6 -14  -7    0.07    0.38   9
   6 -10  -2  224.52    1.42   9
   6  -8  -1   27.04    0.52   9
   7 -14  -9    6.35    0.37   9
   7  -8  -2    0.79    0.33   9
   8 -10  -4    5.38    0.48   9
   9 -13 -11   10.57    0.29   9
   9  -7  -4   13.83    0.50   9
  10 -12 -13    0.26    0.08   9
  11  -6  -7  232.38    1.30   9
  12  -7 -10   -0.12    0.35   9
   1 -12  -1   99.88    0.96   9
   1 -11   0  104.32    0.91   9
   2 -15  -8    0.35    0.18   9
   4 -14  -5    8.10    0.45   9
   5 -14  -6    7.44    0.44   9
   5 -12  -3   54.71    0.85   9
   5 -11  -2  458.11    2.00   9
   6 -13  -5    4.99    0.49   9
   7 -14 -12    1.11    0.12   9
   7 -14 -10    3.96    0.26   9
   7 -12  -5    3.79    0.55   9
   7 -10  -3    4.92    0.47   9
   8 -13  -8    0.26    0.38   9
   8 -11  -5   32.46    0.69   9
   8  -7  -3   53.09    0.71   9
   9  -9  -5  131.98    1.14   9
   9  -6  -4   41.22    0.58   9
   9  -5  -4   36.23    0.52   9
  10  -8  -6  135.86    1.14   9
  11 -10 -15    5.01    0.19   9
  11 -10 -15    1.60    0.10   9
  11 -10 -10    3.48    0.35   9
  11  -8  -8    9.23    0.54   9
  12  -8 -11    8.99    0.38   9
   3 -13  -3   38.32    0.71   9
   3 -11  -1    6.39    0.47   9
   5  -9  -1   97.18    0.89   9
   6 -14  -8    3.01    0.36   9
   6 -12  -4    3.73    0.50   9
   6 -11  -3  111.18    1.06   9
   7 -13  -7    5.04    0.53   9
   7 -11  -4    7.09    0.50   9
   7  -7  -2  118.48    0.92   9
   8 -13  -9   11.90    0.46   9
   8  -6  -3    5.24    0.32   9
   9 -11  -7    2.35    0.48   9
   9 -10  -6    2.66    0.51   9
  10 -11 -15    2.64    0.15   9
  11 -10 -11   13.32    0.44   9
  12  -8 -12   63.25    0.65   9
   4 -10  -1   41.78    0.65   9
   5 -14  -7    1.94    0.42   9
   6 -14  -9    1.20    0.35   9
   6  -9  -2    9.84    0.43   9
   7  -9  -3    3.31    0.47   9
   8 -13 -13    9.57    0.27   9
   8 -13 -10   13.67    0.42   9
   8  -9  -4    6.48    0.45   9
   9  -8  -5   11.01    0.51   9
  10 -11 -10    0.01    0.40   9
  10  -9  -7   16.42    0.56   9
  10  -7  -6   11.99    0.45   9
  10  -6  -6  107.89    0.93   9
  11 -10 -14    0.23    0.14   9
  11 -10 -13   19.02    0.42   9
  11 -10 -12   11.89    0.39   9
  11  -7  -8   39.01    0.63   9
   2 -14  -5   10.37    0.44   9
   2 -13  -3    9.46    0.49   9
   4 -12  -3    7.17    0.56   9
   4 -11  -2   28.49    0.69   9
   5 -13  -5    4.00    0.45   9
   5 -10  -2   10.04    0.51   9
   5  -8  -1  215.02    1.19   9
   6 -14 -12    3.27    0.16   9
   6 -14 -10   15.62    0.42   9
   8 -13 -11    3.95    0.28   9
   8 -11  -6    1.55    0.47   9
   9 -12 -14    0.09    0.12   9
  10 -11 -14    0.15    0.17   9
  10 -11 -11   62.43    0.75   9
  10  -5  -6   19.09    0.43   9
  11  -8  -9   53.77    0.73   9
  11  -6  -8   25.25    0.53   9
   1 -13  -3   16.66    0.51   9
   1 -10   0   62.24    0.69   9
   2 -11  -1  109.61    0.96   9
   5 -14  -8    9.42    0.42   9
   6 -12  -5    4.77    0.55   9
   6  -8  -2   98.61    0.88   9
   7 -13 -14    0.64    0.12   9
   7 -13  -8    3.23    0.44   9
   7 -12  -6   42.30    0.76   9
   7 -11  -5   16.09    0.61   9
   7 -10  -4   19.64    0.58   9
   8  -8  -4    5.65    0.40   9
   9 -12 -13   21.94    0.40   9
   9  -9  -6   15.07    0.56   9
   9  -7  -5  166.75    1.14   9
  10 -11 -13   28.28    0.49   9
  10 -11 -12    3.90    0.35   9
  10 -10 -16    0.78    0.12   9
  10  -8  -7   64.04    0.81   9
  11  -9 -11   19.66    0.52   9
   2 -14  -6   13.64    0.50   9
   3 -13  -4   95.30    1.00   9
   4 -14  -7    9.84    0.43   9
   4  -9  -1  633.22    2.07   9
   5 -14 -12    0.92    0.16   9
   5 -14  -9    3.37    0.37   9
   5 -11  -3  194.87    1.34   9
   6 -11  -4   39.57    0.73   9
   7 -13  -9    8.18    0.45   9
   8 -12 -15    1.07    0.12   9
   9 -10  -7   47.49    0.77   9
  11  -8 -10    2.56    0.44   9
  11  -7  -9    6.13    0.40   9
   1 -14  -6   20.18    0.50   9
   1 -11  -1    3.42    0.36   9
   2 -13  -4    3.34    0.50   9
   3 -12  -3   10.11    0.59   9
   3 -11  -2  441.26    1.92   9
   4 -13  -5  282.93    1.61   9
   5 -14 -11    2.23    0.22   9
   5 -13  -6   19.03    0.59   9
   7 -13 -13    0.97    0.16   9
   7 -13 -10    7.47    0.40   9
   7 -12  -7    5.33    0.59   9
   8 -12  -9   27.43    0.67   9
   8 -11  -7   38.08    0.73   9
   8  -9  -5   11.33    0.49   9
   8  -7  -4  104.87    0.90   9
  10  -7  -7   24.90    0.55   9
  11  -9 -14    2.38    0.26   9
  11  -9 -13    0.93    0.32   9
  11  -6  -9    4.99    0.39   9
   2 -14  -7    0.21    0.35   9
   3 -14 -12   -0.00    0.09   9
   3 -14 -12   -0.01    0.05   9
   4 -14 -11    0.17    0.21   9
   4 -14  -9   12.98    0.44   9
   4 -12  -4  291.07    1.66   9
   4 -10  -2  176.15    1.20   9
   5  -9  -2  146.28    1.05   9
   6 -13 -14    0.54    0.12   9
   6 -12  -6    9.23    0.59   9
   6  -9  -3  163.57    1.15   9
   7 -13 -11    1.67    0.26   9
   7  -9  -4  180.83    1.23   9
   8  -6  -4   14.01    0.40   9
   9 -11 -15   -0.07    0.15   9
   9 -10  -8   30.69    0.69   9
  10 -10 -15    3.33    0.21   9
  10  -9  -9  154.59    1.20   9
  10  -8  -8   43.88    0.72   9
  10  -6  -7   33.69    0.57   9
  11  -7 -10   43.28    0.70   9
   1 -14  -7   34.42    0.53   9
   1 -13  -4   39.06    0.67   9
   2 -14 -11   -0.04    0.15   9
   2 -12  -3   50.32    0.78   9
   2 -10  -1    0.13    0.29   9
   3 -14  -8    8.41    0.38   9
   4 -13  -6    0.59    0.50   9
   4 -11  -3   13.67    0.53   9
   5 -12  -5   38.73    0.73   9
   7 -11  -6    4.47    0.49   9
   7 -10  -5   18.52    0.59   9
   8 -12 -14    5.37    0.20   9
   9 -11 -10   37.90    0.68   9
   9  -9  -7   25.85    0.61   9
   9  -7  -6  215.98    1.30   9
  10 -10 -14    2.35    0.27   9
  11  -8 -12   43.35    0.66   9
   1 -14 -10    0.05    0.15   9
   2 -14  -9    0.13    0.27   9
   2 -14  -8   34.19    0.56   9
   2 -11  -2    2.07    0.37   9
   3  -9  -1   36.98    0.54   9
   5 -13 -14    0.49    0.12   9
   5 -11  -4  309.87    1.66   9
   5  -8  -2   32.85    0.53   9
   6 -13 -13    3.73    0.22   9
   6 -10  -4  390.30    1.82   9
   7 -12 -15    0.16    0.12   9
   8 -12 -13    0.04    0.17   9
   8 -12 -13    0.11    0.11   9
   8 -11 -16    0.60    0.10   9
   9 -11 -14    2.00    0.24   9
   9 -11 -13    0.59    0.32   9
  10 -10 -13    0.12    0.15   9
  10  -9 -16    0.43    0.16   9
  10  -9 -10   21.97    0.63   9
  10  -7  -8  152.51    1.12   9
  11  -8 -14    3.41    0.31   9
  11  -7 -11    2.50    0.40   9
  11  -6 -10   -0.03    0.35   9
   1 -12  -3  117.59    1.06   9
   2 -13  -5   35.84    0.66   9
   3 -12  -4    7.36    0.56   9
   5 -13  -8   16.07    0.56   9
   6 -13 -12    0.39    0.22   9
   6 -13 -11   37.17    0.61   9
   6 -12  -7    9.22    0.56   9
   6  -8  -3   29.28    0.52   9
   7  -8  -4   18.16    0.48   9
   8  -9  -6   -0.24    0.42   9
   9 -10 -16    0.10    0.14   9
   9 -10  -9   67.24    0.85   9
  10  -8 -17    1.21    0.15   9
  10  -8  -9   61.54    0.81   9
  10  -6  -8   37.66    0.63   9
   1 -10  -1   23.23    0.47   9
   3 -13  -6   19.73    0.57   9
   3 -11  -3   28.20    0.61   9
   3 -10  -2   17.94    0.48   9
   4 -12  -5    0.82    0.47   9
   4  -9  -2    8.10    0.39   9
   5 -13 -13    0.04    0.16   9
   5 -12  -6   25.83    0.68   9
   7 -12 -14    0.48    0.17   9
   7 -11  -7   43.20    0.78   9
   7  -9  -5   50.06    0.73   9
   8 -11  -9   14.05    0.58   9
   9  -9  -8  170.26    1.25   9
  10  -9 -15    8.77    0.32   9
  10  -5  -8    9.23    0.42   9
  11  -7 -15    2.79    0.26   9
   2 -12  -4   64.10    0.88   9
   4 -11  -4  147.44    1.20   9
   4 -10  -3   38.93    0.66   9
   5  -9  -3    1.17    0.31   9
   6 -12 -15    2.66    0.18   9
   6 -12  -8    8.02    0.58   9
   6  -9  -4    0.97    0.38   9
   7 -10  -6    1.13    0.45   9
   7  -7  -4    6.14    0.37   9
   8 -11 -15   10.27    0.28   9
   8  -6  -5   96.12    0.80   9
   9 -10 -15   12.81    0.36   9
   9 -10 -10    0.65    0.43   9
   9  -9 -17    0.10    0.12   9
   9  -7  -7    0.73    0.43   9
  10  -9 -14    3.51    0.32   9
  10  -9 -13    6.55    0.40   9
  10  -9 -12   29.67    0.58   9
  10  -8 -10   13.07    0.58   9
  10  -7  -9   26.92    0.59   9
  11  -7 -14   82.19    0.74   9
  11  -7 -13   15.32    0.43   9
   2 -13  -6    0.21    0.40   9
   4 -13 -13    1.23    0.20   9
   5 -13 -12    2.73    0.24   9
   5 -13 -11    5.86    0.38   9
   5 -13 -10   12.24    0.47   9
   5 -11  -5   48.83    0.77   9
   6 -10  -5   31.67    0.66   9
   7 -12 -13    1.99    0.22   9
   7 -12 -13    0.70    0.14   9
   7 -12 -12    4.34    0.33   9
   7 -11 -16    1.20    0.13   9
   7 -11  -8   13.84    0.60   9
   8 -11 -14    5.97    0.34   9
   8 -10  -8   79.96    0.93   9
   8  -9  -7   10.29    0.50   9
   8  -8  -6    5.53    0.40   9
   9  -9  -9   62.99    0.84   9
   9  -8  -8    0.68    0.45   9
  10  -8 -16    9.56    0.31   9
   1 -13  -6    6.38    0.43   9
   1 -12  -4    0.07    0.44   9
   2 -13 -13    0.18    0.12   9
   2 -11  -3   15.31    0.49   9
   3 -13 -13    0.48    0.16   9
   4 -13  -9   84.71    0.93   9
   4 -12  -6  126.52    1.16   9
   5 -12 -15    0.39    0.12   9
   5 -12  -7    8.00    0.51   9
   7  -8  -5   36.69    0.61   9
   8 -11 -11   17.00    0.55   9
   9 -10 -14    6.40    0.34   9
   9 -10 -13    2.69    0.35   9
   9  -6  -7  155.17    1.05   9
  10  -8 -11    1.21    0.41   9
  10  -6  -9    0.78    0.31   9
   0 -12  -4   19.37    0.59   9
   3 -11  -4  273.24    1.57   9
   3  -9  -2   99.24    0.83   9
   4 -13 -12    0.11    0.21   9
   4 -13 -12   -0.02    0.13   9
   4 -13 -11   26.71    0.55   9
   4 -13 -10   -0.05    0.34   9
   5  -8  -3  107.29    0.86   9
   6 -12 -14    2.31    0.18   9
   6 -12 -10    4.46    0.55   9
   6  -8  -4   18.90    0.45   9
   7 -11  -9   37.03    0.73   9
   7 -10 -17    0.39    0.11   9
   7  -9  -6  104.42    1.00   9
   8 -10 -16    5.07    0.24   9
   8 -10  -9   37.71    0.71   9
   9  -9 -16    7.05    0.29   9
   9  -9 -10   10.03    0.58   9
   9  -5  -7    1.29    0.33   9
  10  -8 -15    0.82    0.29   9
  10  -7 -10    4.32    0.44   9
   1 -13 -12    0.17    0.08   9
   1 -10  -2   45.06    0.64   9
   2 -13 -12    0.03    0.19   9
   2 -12  -5    1.98    0.43   9
   3 -13  -9    0.10    0.35   9
   3 -12 -15    0.21    0.08   9
   3 -10  -3  336.18    1.57   9
   4 -12 -15    0.30    0.10   9
   4 -12 -15    0.32    0.06   9
   4 -11  -5    3.69    0.44   9
   4  -9  -3  215.03    1.24   9
   5 -11  -6   62.37    0.85   9
   6 -12 -13    3.86    0.27   9
   6 -12 -12   55.37    0.72   9
   6 -12 -11    4.51    0.45   9
   6 -11 -16    2.77    0.17   9
   6 -10  -6   23.35    0.62   9
   7 -11 -15    1.73    0.18   9
   8  -9  -8    1.99    0.47   9
   9  -8  -9   70.12    0.85   9
   9  -7 -18    6.19    0.20   9
   9  -7  -8    9.73    0.47   9
  10  -8 -14    2.93    0.35   9
  10  -8 -13    0.22    0.32   9
   0 -13  -8   -0.36    0.30   9
   1 -13 -11    2.64    0.25   9
   1 -13  -8   25.46    0.60   9
   2 -13 -11   20.46    0.45   9
   2 -13  -9   36.29    0.64   9
   3 -13 -11    1.04    0.24   9
   3 -13 -10    5.33    0.37   9
   3 -12  -6   29.97    0.67   9
   4 -12  -7    0.92    0.48   9
   5 -12 -14    0.24    0.17   9
   5 -10  -5    3.44    0.42   9
   5  -9  -4  278.67    1.44   9
   6 -11  -8    8.45    0.60   9
   7 -11 -14   12.84    0.39   9
   7 -11 -10   33.36    0.71   9
   7 -10  -8   24.40    0.68   9
   7  -7  -5   13.91    0.42   9
   8 -10 -15    3.98    0.31   9
   8 -10 -10   17.78    0.58   9
   8  -9 -17    0.65    0.15   9
   8  -6  -6  302.92    1.38   9
   9  -9 -15    1.63    0.30   9
   9  -9 -11   10.57    0.50   9
   9  -8 -17    4.49    0.22   9
  10  -7 -16   12.82    0.35   9
  10  -6 -10   49.74    0.68   9
   1 -13  -9    2.39    0.37   9
   1 -12  -5    2.18    0.40   9
   2 -13 -10    1.24    0.30   9
   2 -11  -4   15.54    0.51   9
   5 -11 -16    1.26    0.15   9
   7 -11 -13    0.57    0.34   9
   7  -8  -6    6.07    0.45   9
   8 -10 -14   15.66    0.49   9
   8  -8 -18    1.16    0.13   9
   9  -9 -14    5.94    0.37   9
   9  -9 -13   21.43    0.57   9
   9  -8 -10   43.88    0.75   9
  10  -7 -15    1.93    0.32   9
  10  -7 -12    0.54    0.37   9
  10  -5 -10   39.30    0.62   9
   0 -12  -5    1.05    0.39   9
   0 -10  -2  176.80    1.10   9
   1 -12 -14    0.03    0.10   9
   2 -12  -6   73.37    0.92   9
   2 -10  -3    0.60    0.30   9
   3 -12  -7   38.84    0.78   9
   3 -11  -5   11.64    0.55   9
   4 -12 -14    3.51    0.23   9
   4 -11  -6   30.36    0.71   9
   5 -12 -12    6.75    0.46   9
   5 -12 -11   54.39    0.81   9
   6 -11  -9    3.44    0.49   9
   6 -10 -17   -0.01    0.09   9
   6 -10 -17   -0.04    0.05   9
   6 -10  -7   38.49    0.72   9
   7 -10 -16    0.53    0.18   9
   8  -9  -9   16.70    0.57   9
   8  -7  -7  145.16    1.05   9
   9  -8 -16    1.62    0.26   9
   9  -7  -9    0.18    0.41   9
  10  -6 -11    0.25    0.34   9
   1 -11  -4   78.41    0.89   9
   2 -12 -14    0.77    0.16   9
   3 -12 -14    3.70    0.22   9
   3 -11 -16    0.62    0.09   9
   3 -10  -4  126.47    1.06   9
   3  -9  -3    0.12    0.31   9
   4 -12  -9    2.79    0.53   9
   4 -11 -16    0.00    0.09   9
   4 -11 -16   -0.00    0.05   9
   5 -10  -6    5.34    0.51   9
   6  -9  -6   28.29    0.60   9
   7 -10  -9    4.53    0.49   9
   8  -9 -16    4.43    0.31   9
   9  -8 -11   33.45    0.67   9
  10  -6 -16    1.58    0.25   9
  10  -6 -12    3.82    0.44   9
  10  -5 -11   22.88    0.54   9
   1 -12  -6    1.34    0.40   9
   3 -12  -8   25.90    0.69   9
   4 -12 -13    2.00    0.29   9
   4 -10  -5    2.74    0.39   9
   4  -9  -4    8.84    0.40   9
   5 -11  -8   11.31    0.55   9
   5 -10 -17    0.70    0.11   9
   5  -9  -5   13.29    0.45   9
   6 -11 -14   14.47    0.39   9
   7 -10 -15   18.99    0.46   9
   7  -9 -17    0.25    0.18   9
   7  -7  -6   48.95    0.65   9
   8  -9 -10   52.16    0.79   9
   8  -6  -7    0.52    0.33   9
   9  -8 -12    2.16    0.45   9
   9  -7 -10  139.56    1.15   9
  10  -6 -15    2.95    0.35   9
   0 -12  -6    8.44    0.45   9
   1 -12 -13    2.15    0.21   9
   3 -12 -13    2.56    0.28   9
   3 -11  -6  254.84    1.56   9
   4 -12 -12   10.42    0.44   9
   4 -12 -11    7.46    0.47   9
   4 -10 -17    2.40    0.15   9
   5 -11 -15    0.65    0.17   9
   5 -11 -15    0.26    0.10   9
   6 -11 -13    7.38    0.40   9
   6 -11 -12   40.67    0.71   9
   6 -10 -16    0.81    0.20   9
   7  -8 -18    1.52    0.16   9
   8  -9 -11  100.82    1.01   9
   8  -8  -9   -0.16    0.39   9
   8  -7 -18    4.57    0.21   9
   9  -8 -14   15.63    0.48   9
  10  -5 -12   13.60    0.50   9
   1 -12  -7    5.47    0.47   9
   2 -12 -13    0.14    0.18   9
   2 -12 -13    0.15    0.11   9
   2 -12  -8   32.09    0.71   9
   3 -12 -12    0.99    0.36   9
   3 -12  -9   28.88    0.65   9
   4 -11 -15    0.39    0.18   9
   5 -11 -14   21.55    0.49   9
   5 -10  -7   32.47    0.71   9
   6  -7  -5   33.34    0.53   9
   7 -10 -13    5.79    0.51   9
   7 -10 -11   32.09    0.69   9
   8  -9 -14    1.44    0.37   9
   8  -9 -12    0.58    0.43   9
   9  -7 -16   10.03    0.40   9
   9  -7 -11   15.36    0.59   9
   0 -12  -7    0.57    0.37   9
   0 -10  -3  104.20    0.88   9
   1 -11 -15    0.12    0.10   9
   1 -11  -5    7.22    0.50   9
   3 -12 -11   24.88    0.57   9
   3 -10  -5    4.71    0.47   9
   4 -11  -8    0.49    0.52   9
   5 -11 -10   12.96    0.57   9
   6 -10  -9    6.89    0.55   9
   6  -8  -6   58.32    0.71   9
   7  -9  -9    0.20    0.43   9
   8  -8 -10   45.25    0.77   9
   9  -6 -17   34.19    0.53   9
   9  -6 -10   39.78    0.63   9
   0 -12 -11   10.88    0.38   9
   1 -12 -12    0.64    0.20   9
   1 -12  -8    0.01    0.40   9
   2 -12 -11    1.46    0.34   9
   2 -12 -10   93.03    0.95   9
   2 -11 -15    2.43    0.17   9
   2 -11  -6    9.47    0.51   9
   3 -11  -7    2.32    0.47   9
   4  -9  -5   93.23    0.91   9
   5 -11 -12  112.09    1.05   9
   5  -9  -6  139.99    1.08   9
   5  -8  -5   63.12    0.70   9
   6 -10 -15    0.64    0.25   9
   6  -9 -17    0.25    0.08   9
   7  -8  -8    4.91    0.43   9
   7  -7  -7   20.25    0.50   9
   8  -7  -9  116.78    1.04   9
   9  -7 -15    1.85    0.35   9
   9  -7 -13    7.03    0.51   9
   9  -7 -12    3.72    0.46   9
  -1 -12  -9    8.51    0.35   9
   0 -11  -5    4.72    0.40   9
   1 -12 -11    4.95    0.34   9
   1 -12 -10    9.20    0.44   9
   1 -10  -4   27.71    0.60   9
   4 -11 -14    5.00    0.32   9
   4 -11  -9    8.29    0.52   9
   6 -10 -10   91.81    1.02   9
   6  -9  -8    5.44    0.47   9
   7  -9 -15   22.34    0.54   9
   7  -9 -10   85.72    0.96   9
   7  -6 -19    0.37    0.12   9
   8  -8 -15    6.81    0.41   9
   8  -7 -17   37.14    0.56   9
   8  -6 -18   12.09    0.33   9
   9  -6 -16   -0.05    0.32   9
   9  -5 -10   33.71    0.57   9
   0 -11 -14    3.36    0.17   9
   1 -11  -6   34.82    0.73   9
   1 -10 -16    0.03    0.08   9
   3 -11 -14   30.65    0.54   9
   3 -11  -8  181.71    1.37   9
   4 -11 -13    3.66    0.40   9
   4 -11 -10   18.25    0.61   9
   4 -10  -7    5.82    0.46   9
   6  -8  -7    7.56    0.46   9
   6  -7  -6   41.54    0.60   9
   7  -9 -14   13.88    0.56   9
   7  -9 -11    2.85    0.46   9
   7  -7 -18    0.53    0.18   9
   8  -5  -8   31.76    0.55   9
   9  -6 -12  101.40    0.99   9
   9  -5 -17   22.94    0.44   9
  -1 -11 -13    0.49    0.18   9
   2 -11 -14    0.46    0.24   9
   2 -11  -7    6.49    0.54   9
   2 -10  -5    0.30    0.37   9
   3 -10 -16    0.19    0.14   9
   3 -10  -6   17.53    0.55   9
   5 -10 -15    3.25    0.26   9
   5  -9  -7    3.46    0.42   9
   6  -9 -16   -0.05    0.26   9
   6  -9  -9    3.37    0.56   9
   7  -8  -9   84.22    0.90   9
   7  -6  -7   29.91    0.52   9
   8  -7 -10    4.09    0.45   9
   9  -6 -15    1.24    0.34   9
   9  -6 -14    6.81    0.49   9
   9  -6 -13    8.32    0.52   9
   9  -5 -11   68.90    0.81   9
   9  -4 -10    1.01    0.29   9
   0 -11  -6    1.04    0.40   9
   0 -10  -4    6.14    0.36   9
   2  -9  -4   63.07    0.71   9
   3 -11  -9    0.39    0.45   9
   4  -9 -17    0.56    0.16   9
   4  -9  -6   25.18    0.56   9
   5 -10 -14   29.21    0.62   9
   5 -10 -10   11.79    0.63   9
   7  -7  -8   80.73    0.84   9
   7  -5 -19    1.04    0.16   9
   8  -5 -18    6.01    0.28   9
   9  -5 -16    7.93    0.39   9
  -1 -11  -6   13.40    0.50   9
   1 -10  -5   21.13    0.57   9
   2 -11 -13    9.10    0.40   9
   2 -11  -8   18.95    0.59   9
   2  -9 -17    0.68    0.14   9
   3 -11 -12    8.11    0.48   9
   3  -9 -17    0.15    0.14   9
   4 -10 -15    2.30    0.27   9
   4 -10  -8    3.33    0.46   9
   4  -8  -5    3.66    0.33   9
   5 -10 -11    9.54    0.58   9
   6  -9 -10  113.48    1.09   9
   6  -8 -17    0.14    0.23   9
   6  -8  -8   36.08    0.68   9
   8  -7 -15   16.07    0.53   9
   8  -6 -17    7.65    0.34   9
   9  -4 -11   10.50    0.43   9
  -1 -11 -12   24.45    0.47   9
   0 -11  -7    9.22    0.50   9
   0 -10 -15    0.14    0.13   9
   1 -11  -8   28.22    0.75   9
   2 -11 -12    7.27    0.48   9
   3 -10 -15    1.69    0.28   9
   3  -8 -18    1.47    0.14   9
   5  -9 -16    2.09    0.26   9
   6  -9 -11   28.43    0.75   9
   6  -7 -18    1.14    0.21   9
   7  -6 -18    0.89    0.22   9
   8  -7 -14    9.72    0.48   9
   8  -7 -13   53.34    0.78   9
   8  -6 -10  203.00    1.25   9
   8  -5  -9  118.52    0.90   9
  -2 -11 -10    0.15    0.27   9
  -1 -11  -7   11.24    0.48   9
   0 -11 -12    3.80    0.31   9
   1 -11 -12   68.27    0.77   9
   1 -11  -9   -0.12    0.52   9
   1  -9  -4   20.19    0.51   9
   2 -11 -10    1.02    0.46   9
   2 -10 -15    0.09    0.23   9
   4 -10 -14  101.30    0.93   9
   4  -9  -7   32.43    0.63   9
   7  -8 -13    8.11    0.51   9
   7  -8 -12    4.90    0.48   9
   7  -4 -19    1.82    0.17   9
   8  -6 -16   20.72    0.54   9
   9  -4 -12    2.04    0.34   9
  -1 -11 -11    0.54    0.28   9
  -1 -10 -14    0.08    0.17   9
   0 -11 -11   13.79    0.50   9
   0 -11  -9   29.61    0.68   9
   0 -11  -8    1.94    0.42   9
   1 -11 -11   16.34    0.51   9
   1 -11 -10  104.55    1.03   9
   2  -9  -5    6.45    0.38   9
   3 -10 -14    7.06    0.46   9
   3 -10  -8    7.38    0.50   9
   3  -9  -6  117.52    1.00   9
   4 -10 -10    8.86    0.54   9
   4  -9 -16    5.27    0.29   9
   5  -9 -15   17.23    0.50   9
   5  -9  -9    1.35    0.49   9
   5  -8 -17    1.12    0.24   9
   5  -6 -19    0.11    0.11   9
   6  -8  -9    0.92    0.41   9
   7  -7 -16   21.22    0.54   9
   7  -7 -10   26.80    0.63   9
   8  -5 -17    8.52    0.39   9
   8  -5 -10   15.40    0.49   9
   8  -4  -9    0.69    0.25   9
   9  -4 -14    1.53    0.41   9
  -1 -10  -5   12.84    0.46   9
   1 -10  -6    0.68    0.37   9
   3 -10  -9   13.01    0.62   9
   3  -9 -16    1.02    0.25   9
   4  -8  -6    8.38    0.38   9
   5  -9 -14  103.22    1.06   9
   5  -9 -10  176.62    1.34   9
   5  -7 -18    0.55    0.11   9
   6  -7  -8   16.65    0.53   9
   6  -5 -19    0.32    0.13   9
   8  -6 -14   95.45    1.01   9
   8  -6 -13    0.28    0.50   9
   8  -6 -12   11.36    0.52   9
   0 -10 -14    1.32    0.21   9
   0  -8 -17    0.03    0.06   9
   1 -10 -14    9.22    0.40   9
   1  -9 -16    0.21    0.16   9
   2 -10 -14   37.33    0.61   9
   2  -9 -16   10.31    0.32   9
   3 -10 -13   15.75    0.56   9
   4  -9 -15   16.70    0.50   9
   4  -9  -8   65.42    0.84   9
   4  -8 -17   18.52    0.39   9
   4  -6 -19    2.08    0.14   9
   5  -9 -13   -0.25    0.55   9
   5  -9 -11  154.37    1.30   9
   5  -8  -8    0.89    0.37   9
   6  -8 -10   14.90    0.55   9
   6  -7 -17   12.63    0.40   9
   6  -6 -18    0.55    0.25   9
   7  -7 -11   36.32    0.69   9
   7  -6  -9  299.75    1.45   9
   7  -5 -18    5.94    0.26   9
   1 -10  -7    6.79    0.47   9
   1  -9  -5  116.78    0.97   9
   1  -8 -17    0.58    0.14   9
   2 -10 -13   37.61    0.71   9
   3  -9  -7    3.91    0.41   9
   3  -8 -17    1.67    0.23   9
   3  -6 -19    0.97    0.13   9
   4  -7 -18    5.86    0.23   9
   5  -9 -12    6.09    0.52   9
   5  -8 -16    0.16    0.33   9
   6  -8 -13   12.40    0.61   9
   6  -8 -12    4.70    0.54   9
   6  -8 -11   82.91    0.96   9
   7  -7 -14   24.59    0.59   9
   7  -7 -13   17.50    0.60   9
   7  -7 -12    9.79    0.51   9
   8  -4 -17    0.49    0.23   9
   8  -4 -10   41.67    0.57   9
  -2 -10 -12   10.49    0.37   9
  -1 -10 -13    1.47    0.21   9
  -1 -10 -13    0.52    0.13   9
  -1 -10  -6    4.81    0.43   9
   0 -10 -13    1.10    0.34   9
   1 -10 -13   91.31    0.92   9
   2 -10  -9    6.71    0.54   9
   2  -8 -17    0.02    0.16   9
   2  -7 -18    0.88    0.14   9
   3  -9 -15   13.32    0.47   9
   3  -7 -18    1.39    0.17   9
   4  -9 -14    0.67    0.45   9
   4  -9  -9    9.99    0.53   9
   5  -7  -7    0.96    0.29   9
   5  -5 -19    0.06    0.16   9
   6  -7 -16   37.01    0.67   9
   6  -7  -9  142.10    1.10   9
   6  -4 -19    0.33    0.19   9
   7  -6 -16    1.37    0.36   9
   7  -6 -10   31.25    0.60   9
   7  -4 -18   11.26    0.37   9
   8  -5 -15    6.09    0.43   9
   8  -5 -14   22.74    0.63   9
   8  -5 -13  121.68    1.07   9
   0  -9 -15    4.12    0.30   9
   1 -10  -8    5.76    0.50   9
   2 -10 -11   17.16    0.61   9
   2 -10 -10  275.15    1.66   9
   2  -9 -15    1.82    0.35   9
   3  -9  -8    3.19    0.48   9
   3  -8  -6   11.61    0.47   9
   4  -9 -13   34.60    0.73   9
   4  -9 -10   58.98    0.86   9
   5  -6 -18    1.34    0.28   9
   7  -5 -17    4.60    0.39   9
   7  -5  -9    0.50    0.30   9
  -2 -10 -11    3.13    0.36   9
  -2 -10  -7   22.88    0.60   9
  -1 -10  -7   19.02    0.59   9
  -1  -8 -16    0.02    0.12   9
   0 -10  -8   22.92    0.67   9
   0  -9  -5  100.95    0.91   9
   1 -10 -11   31.79    0.74   9
   1 -10  -9   28.76    0.69   9
   1  -9 -15    1.17    0.29   9
   2  -9  -7  250.53    1.48   9
   4  -9 -11   87.68    1.02   9
   4  -5 -19    0.69    0.16   9
   5  -8 -10   48.47    0.78   9
   7  -6 -15    5.46    0.45   9
   7  -6 -11    5.04    0.47   9
   8  -4 -15    4.32    0.44   9
   8  -4 -12  398.01    1.70   9
  -3  -9 -13    2.39    0.24   9
  -1 -10  -8   16.77    0.59   9
   1 -10 -10    0.37    0.47   9
   3  -9  -9   54.04    0.81   9
   3  -5 -19   -0.04    0.12   9
   4  -8  -8  147.69    1.12   9
   4  -6 -18    1.27    0.27   9
   5  -8 -13  109.79    1.11   9
   5  -8 -12   41.80    0.79   9
   5  -8 -11    7.36    0.55   9
   5  -7  -8   79.08    0.80   9
   5  -4 -19    9.72    0.30   9
   6  -7 -14   10.45    0.54   9
   6  -3 -19   10.63    0.31   9
   7  -6 -14   64.77    0.85   9
   7  -6 -12   23.43    0.64   9
   8  -4 -14   21.24    0.59   9
   8  -4 -13    1.44    0.44   9
  -2 -10  -8   47.46    0.71   9
  -1 -10 -10    1.42    0.40   9
  -1 -10  -9   27.08    0.69   9
   0  -8 -16    5.05    0.26   9
   0  -6 -18    0.46    0.09   9
   1  -8 -16   13.02    0.39   9
   2  -9 -14    3.67    0.44   9
   2  -5 -19    0.50    0.10   9
   2  -5 -19    0.29    0.06   9
   3  -9 -12   80.27    1.03   9
   3  -9 -10    5.70    0.55   9
   4  -8 -15   14.09    0.55   9
   6  -7 -13  205.69    1.42   9
   6  -7 -12   12.25    0.54   9
   6  -6 -16   10.05    0.51   9
   6  -6  -9    1.70    0.36   9
   0  -9 -14   18.95    0.47   9
   0  -7 -17    1.94    0.16   9
   1  -9 -14   39.67    0.66   9
   2  -9  -8    0.19    0.39   9
   3  -9 -11   35.57    0.75   9
   3  -8  -7  151.67    1.10   9
   3  -7 -17    6.24    0.31   9
   3  -6 -18    3.40    0.23   9
   4  -8  -9   11.54    0.51   9
   5  -6 -17   61.84    0.75   9
   7  -5 -11    6.79    0.41   9
   1  -7 -17    0.49    0.10   9
   2  -7 -17    0.07    0.12   9
   2  -6 -18    0.41    0.09   9
 -13   1  -7    0.14    0.18  10
 -12  -3  -4    0.37    0.43  10
 -11  -2  -7   13.90    0.59  10
 -10  -4  -5    1.28    0.55  10
 -10  -1  -9   11.55    0.51  10
  -9  -5  -2  128.12    1.18  10
  -9  -4  -6    7.90    0.62  10
  -8  -5  -4    3.45    0.50  10
  -8  -4  -7   17.53    0.70  10
  -8   2 -12    3.71    0.37  10
  -7  -5  -5    0.40    0.50  10
  -6  -5  -5   71.86    0.97  10
  -6  -4  -8   59.44    0.99  10
  -5  -5  -5   55.68    0.83  10
  -5  -3 -10    7.93    0.73  10
  -5  -2 -11    3.02    0.59  10
  -5   1 -13   20.87    0.68  10
  -4  -3 -10   20.42    0.71  10
  -4  -1 -12   21.87    0.75  10
  -3  -4  -8   29.32    0.71  10
  -3  -3 -10   13.75    0.71  10
  -2  -2 -11    1.87    0.56  10
  -2  -1 -12   10.05    0.64  10
   0  -1 -11  345.72    1.71  10
 -14   2  -6    0.08    0.10  10
 -14   2  -6    0.09    0.05  10
 -13  -3  -2   33.54    0.69  10
 -12  -2  -6   14.18    0.52  10
 -12  -1  -7   17.29    0.48  10
 -11  -4  -4    1.14    0.58  10
 -11  -3  -6   19.18    0.64  10
 -11   3 -10    1.48    0.16  10
  -9  -5  -3    3.56    0.50  10
  -9  -5  -1    4.01    0.38  10
  -9  -1 -10    7.16    0.52  10
  -8  -2 -10   15.88    0.69  10
  -7  -4  -8    7.52    0.63  10
  -6  -3 -10    5.00    0.73  10
  -5  -5  -6    6.94    0.49  10
  -3   0 -13   27.83    0.79  10
 -14  -1  -4    4.20    0.33  10
 -12   0  -8    4.05    0.28  10
 -11   2 -10    1.96    0.21  10
 -10   0 -10    0.71    0.25  10
  -9  -5  -4   24.94    0.72  10
  -9  -4  -7   29.04    0.84  10
  -8  -1 -11    4.07    0.56  10
  -8   1 -12    0.42    0.33  10
  -7  -5  -6   19.02    0.66  10
  -7   3 -13    2.57    0.27  10
  -7   4 -13    5.10    0.26  10
  -6  -1 -12   62.73    0.95  10
  -6   1 -13    8.58    0.47  10
  -5  -4  -9   31.40    0.80  10
  -4  -4  -9    6.15    0.56  10
  -2  -3 -10   16.34    0.58  10
  -1  -2 -11  307.88    1.71  10
 -14   1  -6    0.10    0.14  10
 -13  -3  -3    3.98    0.46  10
 -13  -1  -6    1.82    0.25  10
 -13  -1  -6    0.57    0.15  10
 -12  -4  -2    2.38    0.43  10
 -12   2  -9    0.24    0.12  10
 -12   2  -9   -0.02    0.06  10
 -10  -5  -3   43.40    0.86  10
 -10  -5  -2    4.96    0.50  10
 -10  -4  -6   27.77    0.74  10
  -9   0 -11    5.06    0.37  10
  -8  -4  -8    4.42    0.60  10
  -6  -5  -7   21.48    0.73  10
  -6  -4  -9    3.89    0.61  10
  -5  -5  -7   25.28    0.71  10
  -4  -5  -7  175.46    1.40  10
  -3  -4  -9   19.00    0.63  10
 -13   0  -7    0.91    0.17  10
 -10  -5  -4    2.02    0.58  10
 -10  -3  -8   -0.09    0.48  10
 -10  -2  -9    9.22    0.47  10
  -9  -3  -9   -0.39    0.58  10
  -9  -2 -10    6.40    0.50  10
  -7  -5  -7    3.11    0.57  10
  -7   2 -13    2.39    0.25  10
  -5  -3 -11    1.38    0.54  10
  -4  -3 -11   17.76    0.70  10
  -4   2 -14    2.84    0.35  10
  -3  -2 -12    0.14    0.54  10
  -2  -4  -9   45.97    0.81  10
  -2  -2 -12    5.65    0.62  10
  -1  -3 -10  297.36    1.59  10
 -13  -3  -4    0.79    0.39  10
 -12  -2  -7    0.45    0.32  10
 -12  -1  -8    1.05    0.25  10
 -11  -1  -9    0.21    0.21  10
 -11  -1  -9    0.12    0.13  10
 -11   1 -10    0.57    0.14  10
 -11   1 -10    0.21    0.09  10
 -10  -4  -7    3.10    0.58  10
 -10  -1 -10    1.66    0.29  10
 -10   1 -11    3.37    0.24  10
  -9  -5  -6   37.74    0.87  10
  -9   2 -12    1.40    0.19  10
  -8  -5  -7    9.83    0.67  10
  -5  -5  -8    7.51    0.59  10
  -5  -4 -10    4.22    0.62  10
  -5   2 -14   13.83    0.44  10
  -4  -5  -8   23.93    0.69  10
  -4  -4 -10   33.81    0.82  10
  -3  -5  -7   68.79    0.87  10
  -2  -1 -13    4.33    0.60  10
 -14  -1  -5    0.77    0.19  10
 -12  -3  -6    1.58    0.37  10
 -11  -5  -3   72.81    0.94  10
 -11  -5  -2    4.43    0.45  10
 -11  -4  -6    3.94    0.51  10
 -10  -5  -5   45.81    0.81  10
  -9  -1 -11    4.39    0.32  10
  -7  -6  -3  105.82    1.05  10
  -7  -5  -8    5.00    0.66  10
  -7   1 -13    5.82    0.30  10
  -6  -6  -5   48.01    0.87  10
  -6  -6  -4   23.58    0.63  10
  -6  -6  -3  110.63    1.04  10
  -6  -2 -12   69.21    0.92  10
  -5  -1 -13   26.39    0.69  10
  -3  -5  -8   70.57    0.90  10
  -3  -4 -10    4.55    0.52  10
  -1  -2 -12    1.93    0.45  10
 -14  -2  -4    4.38    0.30  10
 -13  -2  -6    0.24    0.25  10
 -13  -1  -7    0.14    0.19  10
  -9   1 -12    7.65    0.30  10
  -8  -6  -4    3.19    0.49  10
  -8  -6  -2  118.03    1.06  10
  -7  -6  -5   37.85    0.79  10
  -7  -6  -2    5.48    0.43  10
  -7  -3 -11    0.45    0.58  10
  -6  -6  -6   58.52    0.95  10
  -5  -6  -5   50.31    0.79  10
  -5  -5  -9    5.34    0.66  10
  -4  -5  -9   11.18    0.67  10
  -2  -4 -10   54.23    0.84  10
  -1  -4  -9  319.47    1.61  10
  -1  -1 -13    1.56    0.46  10
   0  -3 -10   41.10    0.64  10
 -12  -4  -5    4.79    0.43  10
  -9  -6  -4    0.49    0.56  10
  -9  -6  -3    1.35    0.42  10
  -9  -6  -2   36.59    0.70  10
  -9  -5  -7    0.99    0.52  10
  -8  -6  -5    1.90    0.47  10
  -8  -5  -8    0.51    0.56  10
  -8  -1 -12    0.14    0.31  10
  -7  -6  -6    4.94    0.56  10
  -7  -2 -12   14.39    0.59  10
  -6  -5  -9   23.34    0.74  10
  -5  -6  -6    6.73    0.51  10
  -4  -6  -5   37.16    0.69  10
  -4   0 -14   11.73    0.52  10
  -3  -5  -9  140.31    1.25  10
  -3  -3 -12   64.72    0.95  10
  -2  -5  -8  195.02    1.34  10
 -13  -4  -3   26.02    0.53  10
 -11  -5  -5    8.52    0.52  10
 -11  -4  -7    3.63    0.45  10
 -11  -2  -9    2.32    0.22  10
 -10  -4  -8   14.99    0.55  10
 -10  -2 -10    6.08    0.30  10
  -9  -4  -9    8.98    0.54  10
  -9  -3 -10   10.40    0.45  10
  -8  -6  -6    5.72    0.54  10
  -6  -6  -7  117.30    1.22  10
  -6   2 -14    8.79    0.29  10
  -5  -6  -7   28.53    0.73  10
  -4  -6  -6  116.35    1.10  10
  -3  -4 -11    5.25    0.58  10
  -2  -3 -12   17.11    0.66  10
  -2  -2 -13  110.22    1.12  10
   0  -2 -12  159.85    1.17  10
 -12  -5  -3   12.40    0.53  10
 -12  -3  -7    0.88    0.23  10
 -12  -2  -8    2.10    0.21  10
 -10  -6  -3   86.23    1.01  10
 -10  -6  -2    6.65    0.45  10
  -9  -6  -5   57.38    0.89  10
  -9  -2 -11    2.23    0.25  10
  -9  -2 -11    0.21    0.15  10
  -8  -4 -10   68.42    0.90  10
  -8   1 -13    0.48    0.16  10
  -7  -6  -7    3.10    0.54  10
  -6  -3 -12    4.93    0.50  10
  -6   1 -14    0.03    0.23  10
  -5  -5 -10    6.30    0.63  10
  -5  -2 -13    1.75    0.43  10
  -4  -5 -10    5.91    0.62  10
  -3  -6  -6  130.91    1.13  10
  -2  -4 -11   35.93    0.79  10
  -1  -3 -12   30.26    0.73  10
  -1  -2 -13   53.73    0.85  10
 -13  -4  -4    0.76    0.30  10
 -12  -4  -6    1.70    0.34  10
 -12  -1  -9    1.53    0.16  10
 -11  -1 -10    0.07    0.08  10
 -10  -6  -4    3.22    0.44  10
 -10  -5  -7   31.65    0.67  10
  -9  -6  -6    2.80    0.56  10
  -9  -5  -8   11.74    0.58  10
  -6  -6  -8   41.44    0.83  10
  -6  -5 -10    1.59    0.58  10
  -6  -2 -13   -0.34    0.39  10
  -5  -6  -8   87.88    1.10  10
  -4  -6  -8   18.42    0.65  10
  -4  -1 -14    6.28    0.47  10
  -3  -6  -7  327.49    1.74  10
  -3  -5 -10    9.89    0.60  10
  -2  -1 -14    2.21    0.42  10
  -1  -5  -8  531.59    2.01  10
 -13  -2  -7    2.04    0.18  10
 -12  -5  -4    0.65    0.40  10
 -11  -5  -6    4.03    0.39  10
  -7  -4 -11   77.72    0.93  10
  -6   0 -14    1.08    0.24  10
  -4  -4 -12  122.77    1.20  10
  -3  -6  -8    5.00    0.50  10
  -3  -3 -13   21.60    0.68  10
  -2  -5 -10   23.13    0.63  10
  -1  -5  -9   15.34    0.58  10
  -1  -4 -11   18.79    0.59  10
   0  -4 -10   17.32    0.54  10
 -11  -4  -8    4.28    0.38  10
  -9  -4 -10    2.75    0.33  10
  -9  -1 -12    4.77    0.22  10
  -9  -1 -12    1.66    0.14  10
  -7  -7  -4   26.02    0.68  10
  -7  -7  -3    0.71    0.46  10
  -6  -7  -5   43.07    0.80  10
  -6  -7  -4    8.88    0.51  10
  -6  -6  -9    0.62    0.53  10
  -5  -6  -9    3.56    0.57  10
  -5  -3 -13    8.34    0.52  10
  -4  -6  -9   67.26    0.97  10
  -4  -5 -11   93.61    1.10  10
  -2  -3 -13  210.22    1.44  10
   0  -2 -13   13.21    0.55  10
 -13  -4  -5    5.40    0.32  10
 -12  -3  -8    1.52    0.20  10
 -11  -6  -4    1.79    0.46  10
 -11  -2 -10    2.47    0.19  10
 -10  -6  -6    6.90    0.46  10
  -9  -5  -9   -0.06    0.41  10
  -9  -3 -11    0.25    0.20  10
  -9  -3 -11    0.05    0.13  10
  -8  -7  -4   19.73    0.61  10
  -8  -7  -2    2.74    0.48  10
  -8  -4 -11    7.18    0.41  10
  -7  -7  -6    5.69    0.56  10
  -7  -7  -2  116.55    1.08  10
  -7  -2 -13    3.67    0.32  10
  -7   1 -14    0.92    0.15  10
  -6  -7  -6   60.96    0.94  10
  -6  -4 -12   17.96    0.62  10
  -5  -7  -6  194.55    1.44  10
  -5  -7  -5    1.38    0.45  10
  -4  -2 -14    1.61    0.46  10
  -3  -6  -9   15.99    0.65  10
  -3  -5 -11    9.32    0.57  10
  -3  -2 -14    5.24    0.44  10
  -2  -6  -8    5.16    0.44  10
  -1  -5 -10   11.40    0.58  10
   1  -3 -11    2.34    0.32  10
 -12  -2  -9    0.48    0.11  10
 -10  -2 -11    0.05    0.13  10
 -10  -2 -11   -0.03    0.07  10
  -9  -7  -4   16.71    0.64  10
  -9  -7  -2    8.53    0.52  10
  -8  -7  -6    1.68    0.56  10
  -8  -3 -12    0.75    0.25  10
  -8  -1 -13    0.48    0.18  10
  -6  -7  -7    5.39    0.55  10
  -6  -5 -11   35.14    0.75  10
  -6  -3 -13    0.96    0.39  10
  -6  -1 -14    0.47    0.23  10
  -5  -7  -7    8.82    0.57  10
  -5  -7  -3    0.38    0.34  10
  -5  -6 -10    0.50    0.61  10
  -4  -7  -6   13.68    0.55  10
  -4  -6 -10   81.25    1.10  10
  -2  -6  -9    4.69    0.54  10
  -2  -5 -11   58.69    0.88  10
  -1  -4 -12   92.22    0.99  10
  -1  -2 -14    0.47    0.43  10
   0  -4 -11    1.22    0.38  10
 -11  -6  -5   18.86    0.52  10
 -10  -6  -7    8.73    0.49  10
  -9  -7  -5   -0.21    0.40  10
  -8  -6  -9    1.29    0.52  10
  -7  -5 -11    6.02    0.48  10
  -5  -7  -8   12.09    0.67  10
  -4  -7  -7  202.81    1.48  10
  -3  -6 -10   10.04    0.58  10
   0  -5  -9    3.84    0.39  10
 -12  -5  -6    1.10    0.26  10
 -10  -7  -3   10.88    0.51  10
 -10  -4 -10    5.07    0.27  10
  -6  -7  -8    7.95    0.60  10
  -5  -5 -12    7.28    0.55  10
  -4  -7  -8   16.83    0.68  10
  -4  -4 -13    1.70    0.44  10
  -3  -7  -7    7.33    0.50  10
  -3  -7  -6  185.56    1.31  10
  -3  -5 -12   36.21    0.74  10
  -3  -1 -15   -0.28    0.29  10
  -2  -4 -13    6.11    0.53  10
  -1  -6  -8  100.37    0.94  10
  -1  -6  -7   98.48    0.90  10
  -1  -5 -11   67.69    0.92  10
   0  -5 -10   10.78    0.53  10
   0  -3 -13  160.84    1.19  10
   1  -3 -12   17.77    0.47  10
 -13  -5  -4    4.96    0.29  10
 -11  -6  -6    3.06    0.32  10
  -9  -5 -10   16.13    0.41  10
  -8  -2 -13    0.27    0.15  10
  -7  -6 -10    7.43    0.53  10
  -7  -3 -13    3.34    0.28  10
  -6  -2 -14   12.56    0.37  10
  -5  -7  -9   20.49    0.69  10
  -5  -4 -13   11.66    0.48  10
  -5   0 -15    0.28    0.16  10
  -4  -7  -9    7.80    0.64  10
  -4  -6 -11    5.42    0.55  10
  -4  -3 -14    3.75    0.37  10
  -4  -1 -15    4.28    0.30  10
  -3  -7  -8    3.46    0.50  10
  -2  -5 -12   56.27    0.87  10
  -1  -6  -9    2.81    0.46  10
 -12  -6  -4   18.15    0.43  10
 -12  -4  -8    0.80    0.16  10
 -11  -5  -8    2.56    0.24  10
 -11  -5  -8    0.68    0.14  10
 -11  -3 -10    1.57    0.14  10
 -10  -7  -5   19.38    0.52  10
  -9  -7  -7   33.62    0.67  10
  -9  -6  -9   13.61    0.48  10
  -8  -7  -8    5.33    0.54  10
  -8  -5 -11   31.61    0.54  10
  -6  -7  -9   50.53    0.87  10
  -6  -5 -12    0.35    0.40  10
  -5  -3 -14    8.52    0.39  10
  -3  -7  -9    8.32    0.63  10
  -3  -6 -11   38.97    0.78  10
  -2  -7  -7   95.09    1.02  10
  -2  -7  -6   56.41    0.78  10
  -1  -5 -12  308.23    1.74  10
  -1  -4 -13  445.22    1.99  10
   0  -5 -11    6.73    0.51  10
 -11  -7  -3   49.52    0.70  10
 -10  -7  -6    4.25    0.44  10
 -10  -6  -8    0.39    0.31  10
  -9  -3 -12    0.11    0.13  10
  -8  -4 -12    4.58    0.23  10
  -8  -4 -12    0.68    0.13  10
  -7  -8  -6    3.30    0.57  10
  -7  -8  -4   19.88    0.64  10
  -7  -7  -9   15.11    0.59  10
  -6  -8  -6    8.53    0.55  10
  -6  -8  -5   58.42    0.90  10
  -6  -8  -4   28.85    0.68  10
  -6  -6 -11    1.94    0.47  10
  -5  -8  -6   10.76    0.65  10
  -5  -1 -15    1.48    0.21  10
  -3  -2 -15   26.06    0.56  10
  -2  -2 -15    0.30    0.34  10
 -13  -5  -5    0.96    0.19  10
 -12  -6  -5    0.25    0.26  10
 -12  -5  -7    3.31    0.20  10
 -11  -7  -4   34.22    0.60  10
 -11  -6  -7   22.49    0.44  10
  -8  -8  -5    2.15    0.48  10
  -7  -6 -11   25.69    0.56  10
  -6  -8  -7    3.44    0.53  10
  -5  -8  -7   20.09    0.69  10
  -5  -8  -4    3.49    0.48  10
  -5  -7 -10   68.74    0.96  10
  -4  -7 -10    0.53    0.55  10
  -4  -5 -13   14.40    0.52  10
  -4  -2 -15    3.33    0.31  10
  -3  -7 -10   73.74    0.97  10
  -3  -4 -14    1.97    0.44  10
  -2  -7  -9   16.34    0.59  10
  -2  -5 -13   55.13    0.85  10
   0  -6  -9   36.40    0.69  10
   0  -4 -13    5.39    0.47  10
   0  -3 -14   -0.01    0.40  10
   1  -4 -12   10.22    0.50  10
 -11  -7  -5    3.32    0.36  10
  -9  -8  -4    3.32    0.47  10
  -9  -7  -8   11.24    0.44  10
  -8  -8  -6    1.99    0.44  10
  -8  -8  -2   18.42    0.54  10
  -7  -8  -7   16.10    0.60  10
  -7  -8  -2   50.71    0.74  10
  -7  -4 -13    5.62    0.30  10
  -7  -2 -14    0.30    0.13  10
  -6  -8  -8   68.41    0.97  10
  -6  -8  -2   27.68    0.62  10
  -5  -8  -8    1.02    0.54  10
  -5  -6 -12    1.02    0.44  10
  -5  -5 -13    3.15    0.38  10
  -4  -8  -7   60.53    0.92  10
  -4  -8  -5    4.86    0.49  10
  -4  -8  -4  138.80    1.15  10
  -4  -4 -14    5.22    0.36  10
  -3  -6 -12    7.74    0.54  10
   0  -6 -10   27.55    0.66  10
   0  -5 -12  142.65    1.16  10
 -12  -6  -6    1.95    0.24  10
 -11  -5  -9    0.47    0.13  10
 -10  -7  -7    5.41    0.31  10
 -10  -6  -9    0.37    0.23  10
 -10  -5 -10    0.29    0.13  10
 -10  -5 -10    0.11    0.08  10
  -9  -6 -10    0.13    0.22  10
  -9  -5 -11    0.10    0.16  10
  -8  -8  -7   17.34    0.59  10
  -5  -2 -15    2.03    0.20  10
  -4  -8  -8   35.31    0.76  10
  -3  -8  -7   21.50    0.64  10
  -3  -3 -15    3.02    0.34  10
  -2  -7 -10   14.97    0.60  10
  -2  -6 -12   44.17    0.80  10
  -1  -7  -9    3.39    0.50  10
  -1  -7  -7    4.73    0.38  10
  -1  -7  -6    6.68    0.38  10
  -1  -5 -13    0.11    0.46  10
  -1  -4 -14    6.65    0.46  10
 -11  -7  -6    2.82    0.29  10
 -10  -4 -11    0.19    0.09  10
  -9  -8  -6   29.10    0.59  10
  -5  -8  -9  133.47    1.22  10
  -5  -7 -11   10.17    0.55  10
  -4  -3 -15    1.24    0.25  10
  -3  -8  -5   30.04    0.64  10
  -3  -7 -11    0.30    0.48  10
  -2  -3 -15   77.37    0.78  10
  -1  -6 -12    2.05    0.45  10
   0  -6 -11  168.33    1.28  10
   2  -4 -11   74.46    0.74  10
 -11  -6  -8    0.50    0.15  10
 -10  -8  -5    3.52    0.39  10
 -10  -8  -4   20.66    0.51  10
  -9  -7  -9    3.33    0.30  10
  -9  -4 -12   -0.01    0.05  10
  -8  -7 -10    0.16    0.30  10
  -3  -8  -9   17.95    0.64  10
  -3  -6 -13   49.26    0.78  10
  -3  -5 -14   22.21    0.55  10
  -2  -8  -7    5.52    0.55  10
  -2  -7 -11   76.05    0.96  10
  -1  -3 -15   -0.48    0.28  10
   0  -5 -13   53.41    0.82  10
   0  -4 -14    2.88    0.44  10
  -9  -8  -7    1.44    0.29  10
  -7  -9  -5   -0.02    0.51  10
  -7  -8  -9    4.76    0.44  10
  -6  -9  -5   51.45    0.88  10
  -4  -8 -10   33.11    0.73  10
  -4  -5 -14    0.77    0.30  10
  -2  -8  -9    4.36    0.62  10
  -2  -8  -8   36.27    0.74  10
  -2  -8  -6   97.68    0.96  10
  -2  -5 -14   13.03    0.47  10
   0  -7  -8    9.73    0.46  10
   0  -7  -7  416.65    1.71  10
   1  -6 -10    2.17    0.44  10
   1  -6  -9    5.40    0.38  10
   2  -4 -12   13.89    0.44  10
 -12  -6  -7    0.19    0.12  10
 -11  -7  -7    0.76    0.20  10
 -10  -8  -6    8.17    0.34  10
  -8  -9  -4    3.44    0.47  10
  -8  -4 -13    0.00    0.07  10
  -8  -4 -13    0.10    0.04  10
  -7  -9  -6    2.58    0.45  10
  -7  -9  -4   94.55    1.02  10
  -7  -7 -11    6.37    0.32  10
  -7  -5 -13    0.15    0.15  10
  -6  -9  -7   81.63    0.97  10
  -6  -9  -4    1.77    0.47  10
  -6  -8 -10   26.52    0.61  10
  -5  -9  -7   59.62    0.90  10
  -5  -9  -6   30.38    0.73  10
  -5  -9  -5    3.12    0.51  10
  -5  -9  -4   57.18    0.87  10
  -5  -3 -15    0.08    0.14  10
  -4  -7 -12    0.67    0.44  10
  -3  -8 -10   20.52    0.66  10
  -3  -4 -15   25.77    0.53  10
  -2  -7 -12    0.54    0.52  10
  -2  -4 -15    0.49    0.35  10
  -1  -6 -13    5.68    0.51  10
   0  -7  -9    6.13    0.45  10
   0  -6 -12  164.20    1.26  10
   2  -5 -10   15.72    0.43  10
 -12  -7  -5    3.34    0.22  10
 -11  -8  -4    0.16    0.26  10
 -10  -6 -10    1.26    0.14  10
  -9  -8  -8    0.92    0.28  10
  -8  -9  -6    5.42    0.46  10
  -8  -8  -9    2.88    0.34  10
  -6  -9  -3   56.21    0.79  10
  -5  -9  -8  117.18    1.14  10
  -4  -9  -8   11.72    0.67  10
  -4  -9  -7   14.20    0.61  10
  -4  -9  -5  277.64    1.62  10
  -4  -4 -15   -0.08    0.20  10
  -2  -8 -10   76.07    0.96  10
  -1  -8  -8   66.40    0.88  10
  -1  -8  -7   69.90    0.83  10
   0  -7 -10   17.40    0.55  10
   1  -6 -11   19.32    0.54  10
   2  -5 -11   46.37    0.64  10
 -10  -8  -7    1.91    0.27  10
  -9  -9  -5    5.05    0.42  10
  -9  -9  -3    0.97    0.37  10
  -9  -7 -10    0.82    0.17  10
  -9  -6 -11    1.28    0.13  10
  -8  -9  -2    3.20    0.45  10
  -7  -9  -2   46.91    0.77  10
  -7  -8 -10    1.04    0.30  10
  -6  -6 -13    0.50    0.17  10
  -5  -9  -3    1.06    0.39  10
  -5  -8 -11   29.42    0.62  10
  -4  -9  -4   13.49    0.53  10
  -4  -8 -11   22.05    0.64  10
  -3  -9  -7   11.71    0.58  10
  -3  -9  -6   45.14    0.77  10
  -1  -8  -9    4.29    0.49  10
  -1  -8  -6   27.05    0.56  10
  -1  -7 -12    2.17    0.49  10
   0  -7 -11  287.30    1.60  10
   0  -6 -13   18.40    0.62  10
   0  -5 -14    1.32    0.39  10
 -11  -8  -5    4.72    0.27  10
 -11  -6  -9   -0.02    0.04  10
 -10  -7  -9    5.16    0.22  10
  -8  -9  -7    5.49    0.39  10
  -8  -6 -12    2.70    0.16  10
  -8  -6 -12    0.09    0.08  10
  -7  -9  -8    5.84    0.43  10
  -6  -9  -9   94.71    0.96  10
  -6  -8 -11    0.13    0.30  10
  -4  -9  -9  113.91    1.14  10
  -4  -7 -13   27.70    0.58  10
  -3  -9  -8    4.20    0.52  10
  -3  -9  -5    6.83    0.46  10
  -3  -7 -13    5.08    0.47  10
  -3  -6 -14    1.54    0.32  10
  -2  -8 -11   14.08    0.58  10
  -2  -6 -14   27.82    0.59  10
  -1  -8 -10   11.63    0.56  10
  -1  -8  -5  356.25    1.56  10
   1  -6 -12   33.00    0.66  10
   2  -5 -12    1.15    0.35  10
 -12  -7  -6    0.02    0.12  10
 -11  -7  -8    0.87    0.15  10
  -9  -9  -6   27.99    0.51  10
  -9  -8  -9    4.68    0.27  10
  -8  -8 -10    0.88    0.22  10
  -7  -7 -12    5.68    0.25  10
  -5  -9  -2   11.78    0.53  10
  -5  -4 -15    1.15    0.13  10
  -4  -9  -3   28.17    0.59  10
  -4  -6 -14   22.99    0.43  10
  -4  -6 -14    7.89    0.27  10
  -3  -9  -4  139.91    1.12  10
  -3  -5 -15    0.31    0.23  10
  -2  -9  -8    5.93    0.53  10
  -2  -9  -7   39.06    0.75  10
  -2  -5 -15   30.88    0.57  10
  -1  -6 -14    0.50    0.42  10
   0  -8  -8    8.53    0.52  10
   0  -7 -12   26.87    0.62  10
   1  -7 -10   41.10    0.68  10
   1  -7  -9    0.37    0.37  10
   1  -7  -7   83.49    0.78  10
   2  -6  -9    1.10    0.31  10
 -11  -8  -6    0.00    0.18  10
 -10  -8  -8    3.12    0.22  10
  -9  -9  -7    1.69    0.29  10
  -8  -9  -8   17.28    0.44  10
  -7  -9  -9    1.20    0.32  10
  -7  -8 -11    0.75    0.24  10
  -5  -9 -10   25.04    0.59  10
  -5  -7 -13    1.82    0.24  10
  -5  -6 -14    1.37    0.20  10
  -4  -5 -15    2.14    0.21  10
  -3  -9 -10    3.99    0.53  10
  -3  -8 -12    6.82    0.48  10
  -2  -9  -9   67.45    0.91  10
  -1  -8 -11   53.25    0.82  10
   0  -8  -7    0.09    0.34  10
   1  -7 -11  314.95    1.66  10
   2  -6 -11   24.48    0.53  10
 -10  -9  -5    1.96    0.27  10
  -6 -10  -6   20.21    0.58  10
  -6 -10  -5   19.83    0.61  10
  -6 -10  -4   59.30    0.90  10
  -6  -9 -10    4.95    0.38  10
  -6  -9  -1   34.95    0.59  10
  -5 -10  -7  112.32    1.14  10
  -5 -10  -6    4.92    0.49  10
  -5  -8 -12    1.17    0.25  10
  -5  -8 -12    0.64    0.16  10
  -4  -9  -2   16.95    0.54  10
  -3  -9  -3    9.34    0.47  10
  -2  -9 -10   28.55    0.69  10
  -2  -9  -5  139.69    1.10  10
   0  -8 -10   13.49    0.54  10
   3  -5 -10   66.35    0.66  10
 -10  -9  -6    0.17    0.25  10
  -8 -10  -5    7.00    0.43  10
  -7 -10  -6    3.44    0.40  10
  -7 -10  -4    3.60    0.43  10
  -6  -8 -12    2.90    0.24  10
  -6  -7 -13    7.56    0.24  10
  -5 -10  -4   61.67    0.85  10
  -5  -9  -1   68.62    0.76  10
  -4 -10  -8  101.85    1.08  10
  -4 -10  -7    1.74    0.48  10
  -4 -10  -5    0.43    0.45  10
  -4  -9 -11   12.79    0.51  10
  -1  -9  -9   20.97    0.62  10
  -1  -9  -8    9.07    0.54  10
  -1  -9  -7   74.80    0.91  10
   0  -8 -11    0.63    0.45  10
   0  -7 -13   40.02    0.68  10
   2  -6 -12    7.41    0.41  10
 -11  -8  -7    0.50    0.14  10
  -9  -9  -8    3.16    0.23  10
  -8 -10  -3    3.19    0.40  10
  -7 -10  -3   51.89    0.75  10
  -7  -9 -10    1.62    0.23  10
  -6 -10  -3   18.19    0.57  10
  -6  -6 -14    1.22    0.13  10
  -5  -9 -11    2.33    0.27  10
  -5  -9 -11    0.64    0.17  10
  -5  -5 -15    0.29    0.10  10
  -3 -10  -7    5.23    0.52  10
  -3 -10  -6    0.81    0.50  10
  -3  -8 -13    7.35    0.44  10
  -3  -7 -14    7.91    0.32  10
  -2  -7 -14    0.36    0.30  10
  -2  -6 -15    3.40    0.30  10
  -1  -9 -10   25.00    0.68  10
  -1  -9  -6  115.98    1.03  10
   0  -8  -5    7.10    0.36  10
  -9  -8 -10    0.14    0.10  10
  -8  -8 -11    0.39    0.12  10
  -8  -7 -12    0.58    0.09  10
  -7 -10  -8   10.62    0.41  10
  -7 -10  -2    2.98    0.47  10
  -6  -9 -11    8.64    0.33  10
  -5 -10  -9   69.37    0.83  10
  -5 -10  -3   12.96    0.53  10
  -4  -8 -13    0.15    0.26  10
  -4  -7 -14    1.14    0.20  10
  -3 -10  -9   30.75    0.70  10
  -3 -10  -5  138.40    1.17  10
  -3  -9  -2   31.97    0.60  10
  -3  -6 -15    3.41    0.21  10
  -1  -9  -5    1.36    0.37  10
  -1  -7 -14   28.88    0.55  10
   0  -8 -12   16.08    0.55  10
   1  -8  -7  293.42    1.45  10
   1  -6 -14   10.35    0.44  10
   2  -7 -11   32.20    0.67  10
   2  -7  -8    7.47    0.38  10
   2  -6 -13    6.67    0.48  10
 -10  -9  -7    2.71    0.18  10
  -9 -10  -5    4.56    0.33  10
  -9 -10  -4    0.03    0.26  10
  -6 -10  -9    1.68    0.35  10
  -5  -8 -13    4.08    0.22  10
  -4 -10 -10    5.58    0.51  10
  -4  -9 -12    9.55    0.40  10
  -4  -6 -15    0.21    0.13  10
  -3 -10  -4    0.94    0.52  10
  -3  -9 -12    2.75    0.40  10
  -2 -10  -8   59.61    0.87  10
  -2 -10  -6   68.73    0.94  10
  -2  -9  -3  127.94    0.96  10
  -1  -9 -11    3.16    0.47  10
  -1  -8 -13   12.90    0.48  10
   0  -9  -9   21.09    0.61  10
   0  -9  -8    8.73    0.54  10
   0  -9  -7    9.45    0.48  10
   0  -7 -14    1.61    0.41  10
   1  -8 -11  368.45    1.76  10
   1  -7 -13   -0.08    0.40  10
   3  -6 -11   71.23    0.79  10
   3  -6 -10   94.71    0.81  10
   3  -6  -9  245.86    1.21  10
  -9 -10  -6    0.34    0.25  10
  -8  -9 -10    0.77    0.14  10
  -7  -8 -12    0.17    0.06  10
  -5 -10 -10    3.34    0.32  10
  -5  -9 -12    1.67    0.24  10
  -5  -7 -14    2.08    0.15  10
  -2 -10  -9    4.06    0.51  10
  -2 -10  -5   44.28    0.77  10
  -2  -5 -16    0.78    0.16  10
   0  -9 -10   52.98    0.81  10
   0  -9  -6   70.66    0.79  10
   0  -6 -15   13.25    0.40  10
  -8 -10  -8    1.56    0.20  10
  -8 -10  -8    0.53    0.12  10
  -7  -9 -11    0.59    0.14  10
  -6 -10 -10   10.32    0.37  10
  -5 -11  -6   59.38    0.87  10
  -3  -5 -16    0.63    0.12  10
  -1 -10  -9   28.41    0.74  10
  -1 -10  -8   17.59    0.64  10
  -1 -10  -7   22.64    0.66  10
   0  -9 -11   34.94    0.68  10
   1  -8 -12    3.54    0.45  10
   3  -6 -12   63.22    0.74  10
 -10  -9  -8    0.04    0.09  10
  -9 -10  -7    9.42    0.29  10
  -7 -11  -5    2.91    0.42  10
  -6 -11  -7   53.53    0.69  10
  -6 -11  -4    7.99    0.54  10
  -6  -8 -13    0.38    0.11  10
  -5 -11  -5   16.98    0.58  10
  -4 -11  -7  150.75    1.21  10
  -4 -11  -6   -0.05    0.47  10
  -4 -10 -11    3.68    0.31  10
  -3 -10 -11    6.75    0.43  10
  -3 -10  -3    7.00    0.44  10
  -3  -8 -14    0.10    0.22  10
  -2 -10  -4    5.15    0.45  10
  -2  -9  -2   32.19    0.53  10
  -2  -8 -14    5.72    0.32  10
  -2  -7 -15   13.41    0.36  10
  -1 -10 -10    0.70    0.52  10
  -1 -10  -6    5.46    0.48  10
  -1  -8 -14   14.05    0.44  10
  -1  -7 -15    7.58    0.35  10
   0  -9  -5   97.04    0.86  10
   1  -6 -15   22.08    0.49  10
   2  -8  -9   11.92    0.48  10
   2  -8  -8   75.00    0.79  10
   2  -7 -13    3.46    0.46  10
  -7 -11  -7    8.57    0.37  10
  -6 -11  -8    0.79    0.32  10
  -6  -9 -12    0.90    0.12  10
  -5 -11  -8   29.63    0.60  10
  -5 -11  -4   64.65    0.86  10
  -5 -10  -1   20.64    0.55  10
  -4 -11  -5   25.15    0.64  10
  -4  -9 -13    2.13    0.22  10
  -3 -11  -7    3.80    0.49  10
  -3 -11  -6   20.92    0.63  10
  -3  -7 -15    0.72    0.14  10
  -2  -9 -13   14.96    0.42  10
  -1 -10  -5   11.32    0.54  10
  -1  -9  -3    2.22    0.33  10
   1  -9  -7    6.82    0.43  10
   1  -8 -13    6.31    0.42  10
   2  -8  -7   20.35    0.52  10
   3  -7 -11    3.43    0.44  10
   3  -7 -10    2.03    0.36  10
   3  -7  -9   48.01    0.62  10
   3  -6 -13   41.28    0.63  10
  -8 -11  -5    3.40    0.32  10
  -8 -10  -9    0.32    0.12  10
  -8 -10  -9    0.09    0.07  10
  -7 -10 -10    0.03    0.11  10
  -7 -10 -10    0.12    0.07  10
  -6 -11  -3    8.70    0.47  10
  -5 -11  -9   -0.31    0.33  10
  -5 -11  -3   22.02    0.65  10
  -4 -11  -9    2.93    0.42  10
  -4 -11  -4    0.69    0.48  10
  -3 -11  -9   -0.14    0.45  10
  -3 -11  -5    0.55    0.48  10
  -1  -9 -13    2.71    0.36  10
   0 -10  -9    3.20    0.48  10
   0 -10  -8   24.25    0.63  10
   0 -10  -7   41.39    0.77  10
   0  -8 -14   78.04    0.77  10
   1  -9 -11    2.57    0.44  10
   2  -8 -12  354.71    1.70  10
   3  -7 -12  101.87    0.94  10
   3  -7  -8  663.02    1.98  10
  -9 -10  -8    0.10    0.10  10
  -9 -10  -8    0.01    0.06  10
  -8 -11  -6    0.22    0.18  10
  -8 -11  -6    0.12    0.12  10
  -8 -11  -3   15.06    0.44  10
  -7 -11  -8    5.83    0.30  10
  -6 -11  -9   23.43    0.44  10
  -6 -10 -11    0.09    0.13  10
  -6 -10 -11    0.01    0.07  10
  -5  -9 -13    0.48    0.13  10
  -4 -10 -12    0.92    0.22  10
  -4 -10  -1    3.83    0.41  10
  -4  -7 -15    0.07    0.08  10
  -4  -7 -15   -0.01    0.04  10
  -3 -10 -12    7.27    0.34  10
  -2 -11  -8    4.22    0.50  10
  -2 -11  -7    2.88    0.52  10
  -2 -11  -6    0.06    0.47  10
  -2 -10  -3   52.97    0.71  10
  -2  -6 -16    4.63    0.19  10
   0 -10 -10   84.55    0.97  10
   0 -10  -6   66.56    0.87  10
   0  -9 -13    6.72    0.45  10
   1  -9 -12  200.19    1.32  10
   2  -8  -6  196.72    1.10  10
   4  -6 -10   23.38    0.49  10
  -8 -11  -7    2.01    0.22  10
  -6 -11  -2    8.01    0.44  10
  -5 -11 -10    5.53    0.29  10
  -5  -8 -14    0.05    0.06  10
  -5  -8 -14    0.06    0.03  10
  -4 -11 -10    4.70    0.30  10
  -4 -11  -3    5.97    0.46  10
  -3 -11 -10   17.38    0.52  10
  -2 -11 -10    0.99    0.49  10
  -2 -11  -5   12.04    0.62  10
  -1 -10 -12    3.10    0.40  10
   0 -10 -11    3.35    0.47  10
   1  -7 -15    1.69    0.31  10
   2  -8 -13   19.12    0.59  10
   3  -7 -13   68.34    0.79  10
  -9 -11  -5    3.78    0.24  10
  -5 -11  -2  105.01    0.96  10
  -2  -9 -14    4.97    0.29  10
  -2  -8 -15    0.74    0.17  10
  -1 -11  -9    9.77    0.57  10
  -1 -11  -8   76.70    0.94  10
  -1 -11  -7   13.58    0.58  10
  -1  -8 -15    0.62    0.21  10
   0 -10  -5   39.99    0.65  10
   1 -10  -9   30.95    0.67  10
   1 -10  -8    5.47    0.54  10
   2  -9 -11  187.25    1.30  10
   2  -9  -8    0.96    0.38  10
   3  -8 -11   16.91    0.56  10
   3  -8 -10   45.58    0.68  10
   3  -8  -9   25.66    0.55  10
  -9 -11  -6    8.27    0.25  10
  -8 -11  -8   -0.04    0.13  10
  -7 -11  -9   -0.09    0.13  10
  -7 -11  -9   -0.01    0.07  10
  -7 -10 -11    1.18    0.11  10
  -6 -11 -10    0.08    0.15  10
  -5 -12  -7   10.26    0.43  10
  -5 -12  -6   15.05    0.48  10
  -4 -11 -11    6.27    0.29  10
  -4 -11  -2   -0.15    0.45  10
  -3 -11 -11    2.35    0.28  10
  -3 -11  -3   46.26    0.72  10
  -3  -9 -14    1.66    0.15  10
  -3  -9 -14    0.35    0.09  10
  -3  -8 -15    0.39    0.11  10
  -2 -11 -11    8.59    0.43  10
  -2 -11  -4    5.22    0.44  10
  -2 -10 -13    3.45    0.31  10
  -2 -10  -2   22.02    0.49  10
  -1 -11  -6   13.21    0.56  10
  -1 -10  -3    2.86    0.44  10
  -1  -9 -14   11.14    0.33  10
  -1  -9 -14    3.72    0.21  10
   0 -10 -12  112.77    0.96  10
   0  -9  -3   28.38    0.50  10
   0  -8 -15    0.10    0.26  10
   1 -10 -10   -0.08    0.45  10
   1  -9 -13    0.14    0.35  10
   2  -9  -7  237.42    1.33  10
   3  -8 -12    0.40    0.47  10
   3  -8  -8   49.36    0.66  10
  -6 -12  -7    7.65    0.35  10
  -6 -12  -6   11.38    0.39  10
  -5 -12  -8    1.17    0.31  10
  -4 -12  -8   26.29    0.55  10
  -4 -12  -5    6.61    0.47  10
  -4  -9 -14    0.36    0.10  10
  -3 -12  -8   15.26    0.58  10
  -3 -10 -13    0.14    0.09  10
  -1 -11  -5    4.76    0.46  10
   0 -11  -9   34.61    0.77  10
   0  -9 -14   17.94    0.41  10
   1 -10 -11   31.93    0.66  10
   1 -10  -6   -0.05    0.47  10
   2  -8 -14   10.05    0.47  10
   3  -8  -7  172.84    1.05  10
   3  -7 -14    2.57    0.38  10
   4  -7 -11   31.63    0.57  10
   4  -7  -9   29.78    0.52  10
  -7 -12  -6    0.07    0.21  10
  -5 -11 -11    2.36    0.16  10
  -5 -11  -1   27.16    0.60  10
  -4 -12  -9   -0.02    0.32  10
  -4 -12  -4   28.45    0.70  10
  -3 -12  -9   19.35    0.53  10
  -2 -11  -3    4.15    0.51  10
   0 -11  -7    8.59    0.53  10
   0 -10  -4    5.82    0.40  10
   1  -8 -15    7.70    0.34  10
   2  -9  -6   26.96    0.53  10
   4  -7 -12  452.09    1.73  10
   4  -7  -8    4.78    0.37  10
  -7 -12  -7    2.23    0.22  10
  -6 -12  -8    5.40    0.25  10
  -5 -12  -9    5.81    0.28  10
  -5 -12  -3    3.57    0.46  10
  -3 -11 -12    1.78    0.20  10
  -3 -11  -2  112.73    0.98  10
  -2 -12  -9    2.79    0.43  10
  -2 -12  -6    4.21    0.48  10
   0 -11  -6    1.56    0.45  10
   0 -10 -13    1.02    0.27  10
   1 -10  -5   21.81    0.56  10
   2 -10 -10  267.54    1.50  10
   2 -10  -8  145.95    1.16  10
   3  -9 -11   38.10    0.73  10
   3  -9  -9   57.08    0.74  10
   3  -8  -6   11.63    0.40  10
  -8 -12  -5    0.38    0.19  10
  -7 -12  -3    1.74    0.27  10
  -7 -11 -10    0.94    0.09  10
  -6 -11 -11    1.95    0.13  10
  -4 -12  -3   12.96    0.59  10
  -4 -11 -12    0.88    0.14  10
  -4 -11  -1    4.60    0.42  10
  -3 -12 -10    0.85    0.25  10
  -3 -12  -4    3.86    0.47  10
  -2 -12 -10    4.53    0.38  10
  -2 -12  -5   14.30    0.55  10
  -2 -10  -1    0.24    0.33  10
  -1 -10  -2   36.67    0.57  10
   0 -11  -5    4.10    0.50  10
   1 -11  -9    0.41    0.48  10
   1 -11  -8   27.94    0.70  10
   2 -10 -11   17.27    0.52  10
   2 -10  -7   26.06    0.64  10
   2  -9  -5    7.09    0.37  10
   3  -9  -8    2.61    0.40  10
   4  -8 -11   52.86    0.74  10
   4  -7 -13   22.82    0.51  10
  -8 -12  -6    7.41    0.24  10
  -1 -12  -9   14.28    0.55  10
  -1 -10 -14    0.29    0.20  10
  -1  -9 -15    4.58    0.20  10
   0 -11 -12    4.78    0.41  10
   0 -10  -3   99.38    0.88  10
   1 -11 -10  107.60    1.01  10
   1 -11  -7  105.76    1.01  10
   1 -10 -13   90.98    0.82  10
   1  -9  -3  161.36    0.99  10
   2  -8 -15    3.33    0.30  10
   3  -9 -12   77.59    0.84  10
   3  -9  -7    3.84    0.38  10
   5  -6 -10   26.07    0.46  10
  -5 -12 -10    0.73    0.12  10
  -3 -12 -11    1.79    0.23  10
  -3 -11  -1   17.92    0.54  10
  -3 -10 -14    0.01    0.08  10
  -2 -12 -11    8.95    0.35  10
  -2 -12  -4    3.97    0.45  10
   1 -11  -6   34.48    0.72  10
   1 -10  -4   31.15    0.56  10
   2 -10  -6  165.55    1.14  10
   2  -9 -14    3.85    0.33  10
  -5 -13  -6   35.83    0.55  10
  -4 -13  -7   27.56    0.54  10
  -4 -13  -6    2.65    0.39  10
  -4 -12 -11    1.44    0.16  10
  -3 -11 -13    6.18    0.20  10
  -2 -11 -13    1.49    0.15  10
  -1 -12 -11   10.89    0.39  10
  -1 -12  -5    3.31    0.47  10
  -1 -11 -13    0.55    0.22  10
   0 -12 -10   19.02    0.59  10
   0 -12  -8   24.51    0.64  10
   0 -12  -7    0.33    0.46  10
   0 -11  -4   24.94    0.60  10
   1 -11 -12   70.92    0.79  10
   1  -9 -15    1.10    0.23  10
   2 -10 -13   34.80    0.59  10
   2  -9  -4   58.14    0.65  10
   3 -10 -10    8.57    0.48  10
   3 -10  -9   12.53    0.50  10
   3  -9  -6  117.63    0.92  10
   4  -8  -7   27.31    0.53  10
   5  -7 -11    2.02    0.40  10
   5  -7 -10    4.69    0.41  10
  -6 -13  -6    1.25    0.21  10
  -6 -13  -5    5.80    0.32  10
  -6 -12 -10    0.53    0.09  10
  -5 -13  -7    2.61    0.22  10
  -4 -13  -8    1.78    0.27  10
  -3 -13  -7    5.70    0.40  10
  -2 -12  -3    2.08    0.52  10
  -1 -10  -1   21.16    0.44  10
   0 -12  -6    8.80    0.51  10
   0 -10  -2  181.99    1.11  10
   1 -10 -14    8.41    0.33  10
   2 -11 -10    0.74    0.41  10
   2 -11  -9   83.81    0.92  10
   2 -10  -5    0.24    0.36  10
   3 -10 -11   18.01    0.55  10
   3 -10  -8    7.56    0.46  10
   4  -9 -11   91.25    0.93  10
   4  -9 -10   59.03    0.76  10
   4  -9  -9    9.61    0.49  10
   5  -7 -12   60.62    0.71  10
   5  -7  -9   25.67    0.47  10
  -6 -13  -7    0.96    0.18  10
  -5 -13  -8    5.62    0.25  10
  -4 -13  -9    7.92    0.29  10
  -3 -13  -9    0.32    0.26  10
  -3 -12  -2   41.63    0.67  10
  -2 -13  -8    5.01    0.41  10
  -2 -13  -7   52.52    0.75  10
  -2 -12 -12    2.76    0.21  10
  -2 -11  -1  113.26    0.94  10
  -1 -12  -4   17.89    0.59  10
  -1 -11  -2   87.36    0.84  10
   0 -11  -3   18.86    0.58  10
   1 -12  -8    0.70    0.55  10
   2 -11  -7    6.70    0.48  10
   3 -10  -7   34.55    0.62  10
   3  -9 -14   47.23    0.64  10
   4  -9 -12   81.33    0.86  10
   4  -9  -8   65.44    0.76  10
   5  -7  -8   87.00    0.76  10
  -5 -13  -3    4.52    0.41  10
  -5 -12 -11    0.44    0.07  10
  -4 -12  -1   21.52    0.60  10
  -3 -13  -4   25.95    0.63  10
  -3 -12 -12   -0.06    0.11  10
  -2 -13  -9    2.25    0.32  10
  -2 -13  -5    2.94    0.50  10
  -1 -12 -12    2.60    0.23  10
   0 -12  -5    1.23    0.48  10
   1 -12  -7    5.79    0.50  10
   2 -11 -12    7.80    0.44  10
   2 -11  -6   10.17    0.53  10
   2  -9 -15    1.92    0.24  10
   4  -8  -6    9.34    0.39  10
   5  -8 -11    6.42    0.44  10
   5  -8 -10   49.07    0.69  10
  -6 -13  -8    0.41    0.12  10
  -6 -13  -3    2.08    0.27  10
  -2 -13 -10   -0.01    0.21  10
  -2 -12  -2   80.02    0.89  10
  -1 -13  -6   21.04    0.60  10
   1 -12  -6    0.57    0.50  10
   2 -10 -14   13.58    0.35  10
   2 -10  -4   39.24    0.60  10
   3 -10 -13   14.22    0.42  10
   4  -9  -7   33.71    0.58  10
   5  -8 -12   41.72    0.64  10
  -3 -13  -3    2.34    0.47  10
  -3 -12  -1   81.31    0.86  10
  -2 -13  -4    0.56    0.43  10
  -1 -13 -10    2.49    0.26  10
  -1 -13  -5    0.67    0.47  10
  -1 -11 -14    0.29    0.11  10
   0 -13  -9   10.40    0.51  10
   0 -13  -8    0.37    0.49  10
   0 -12  -4   20.41    0.57  10
   0 -11 -14    4.49    0.21  10
   0 -10 -15    0.08    0.10  10
   0 -10 -15   -0.00    0.06  10
   2 -11  -5    6.45    0.52  10
   3 -11 -10  185.45    1.26  10
   3 -11  -9    0.18    0.41  10
   3 -11  -8  184.22    1.25  10
   4 -10 -11    1.85    0.40  10
   4 -10 -10    6.91    0.44  10
   4 -10  -9   29.16    0.62  10
   5  -8  -8    1.17    0.31  10
  -2 -13 -11    0.61    0.17  10
  -1 -11  -1    3.74    0.37  10
  -1 -10   0   67.87    0.68  10
   0 -13 -10    2.88    0.34  10
   0 -10  -1    1.08    0.29  10
   1 -10 -15    0.56    0.15  10
   2 -12  -9   12.16    0.54  10
   3 -11  -7    2.22    0.44  10
   3 -10  -5    6.26    0.40  10
   3  -9  -4   10.28    0.37  10
   4  -9  -6   25.71    0.51  10
   4  -8  -5    2.97    0.30  10
   5  -9 -10  185.27    1.21  10
  -4 -14  -6   17.47    0.40  10
  -4 -13  -2   13.11    0.46  10
  -2 -13  -3   98.11    0.99  10
  -2 -12 -13    0.23    0.08  10
  -2 -11   0   14.84    0.46  10
  -1 -13 -11    0.19    0.19  10
  -1 -13  -4   21.23    0.60  10
  -1 -12 -13    3.07    0.16  10
  -1 -12 -13    0.55    0.09  10
   0 -13  -6    1.42    0.44  10
   0 -12 -13    0.85    0.18  10
   0 -12  -3    0.38    0.48  10
   2 -12  -7   13.36    0.55  10
   2 -10  -3    0.05    0.31  10
   3 -11 -12    7.01    0.39  10
   4 -10  -7    6.46    0.42  10
   5  -9 -12    5.96    0.46  10
   5  -9 -11  159.38    1.11  10
   5  -9  -9    1.77    0.41  10
   5  -8  -7   79.77    0.74  10
   6  -6  -9    2.54    0.26  10
  -4 -14  -5    2.03    0.30  10
  -3 -14  -8    2.71    0.26  10
  -3 -14  -6    0.73    0.29  10
  -3 -14  -5   35.27    0.59  10
  -3 -13  -2  125.81    1.02  10
  -2 -12  -1    0.87    0.38  10
  -2 -10   1   -0.21    0.26  10
   0 -13  -5    9.23    0.49  10
   1 -12  -4   -0.58    0.47  10
   2 -12 -12   15.32    0.44  10
   2 -12  -6   73.53    0.86  10
   2 -11  -4   18.97    0.53  10
   2 -10 -15    0.32    0.18  10
   2  -9  -2    0.46    0.29  10
   4 -10 -13    8.08    0.37  10
   5  -9  -8   10.30    0.46  10
   6  -7  -9  153.51    0.98  10
  -5 -14  -7    4.47    0.19  10
  -4 -14  -8    0.64    0.15  10
  -4 -14  -4    2.08    0.36  10
  -2 -14  -8    1.95    0.24  10
  -2 -14  -6   22.43    0.51  10
   1 -13 -10   30.02    0.54  10
   3 -12  -9   29.55    0.64  10
   3 -11 -13    0.63    0.26  10
   3 -10  -4  135.77    0.99  10
   3  -9  -3    0.31    0.33  10
   4 -11 -10   19.97    0.53  10
   4 -11  -9    7.31    0.47  10
   4  -9  -5   93.10    0.81  10
  -6 -14  -5    1.35    0.16  10
  -3 -14  -9    4.83    0.18  10
  -3 -14  -4   -0.38    0.31  10
  -3 -12   0   66.13    0.73  10
  -2 -14  -9    0.28    0.14  10
  -2 -14  -9    0.14    0.09  10
  -2 -14  -5    9.21    0.43  10
  -2 -13 -12    0.31    0.09  10
  -1 -14  -8    7.93    0.36  10
  -1 -14  -7   58.43    0.72  10
  -1 -14  -6    3.86    0.45  10
  -1 -13  -3    1.13    0.43  10
   1 -11  -2   47.20    0.69  10
   3 -12 -11   24.93    0.52  10
   3 -12  -8   27.88    0.65  10
   4 -11 -12   24.36    0.53  10
   4 -11  -8   -0.36    0.41  10
   5 -10 -11    9.65    0.46  10
   5 -10 -10   11.67    0.49  10
   5 -10  -9   29.68    0.65  10
   5  -9  -7    3.50    0.38  10
   6  -8 -12    4.16    0.41  10
   6  -8 -11   78.82    0.78  10
   6  -7  -8   16.73    0.39  10
  -6 -14  -6    0.21    0.11  10
  -6 -14  -6    0.09    0.06  10
  -5 -14  -8   -0.06    0.09  10
  -4 -14  -3    1.20    0.34  10
  -2 -14  -4   30.39    0.62  10
  -1 -14  -5    2.46    0.45  10
  -1 -12  -1   73.67    0.80  10
  -1 -11   0  117.38    0.89  10
   0 -13 -12    0.08    0.11  10
   0 -13 -12    0.02    0.07  10
   0 -12  -2    4.33    0.45  10
   0 -10   0   36.93    0.52  10
   1 -13  -5   52.46    0.76  10
   1 -12  -3  128.21    1.05  10
   1 -10  -1   21.27    0.46  10
   2 -13 -10    1.41    0.41  10
   2 -13  -9   46.07    0.69  10
   2 -12 -13    0.44    0.23  10
   2 -11  -3   15.38    0.48  10
   2 -10  -2  214.76    1.18  10
   3 -12  -7   38.77    0.69  10
   4 -11  -7    4.65    0.45  10
   4 -10 -14   93.24    0.73  10
   6  -8  -9    0.28    0.32  10
  -3 -14 -10    0.14    0.08  10
  -3 -14  -3   98.74    0.87  10
  -3 -13  -1   -0.14    0.34  10
  -2 -14 -10    0.33    0.10  10
  -2 -12   0    6.11    0.46  10
  -1 -14 -10    0.21    0.16  10
  -1 -10   1   22.09    0.42  10
   0 -14  -9    6.97    0.31  10
   0 -14  -7    5.15    0.42  10
   0 -14  -6    4.40    0.46  10
   1 -13 -12    0.65    0.21  10
   2 -13 -11   31.11    0.52  10
   2 -13  -7    3.08    0.46  10
   2 -12  -4   68.66    0.86  10
   3 -12 -12    0.69    0.28  10
   3 -12  -6   31.27    0.67  10
   3 -11 -14   24.66    0.40  10
   4 -11 -13    2.56    0.31  10
   4 -10  -5    3.10    0.40  10
   4  -9  -4    8.29    0.35  10
   5  -9  -6  149.53    1.02  10
   6  -8  -8   41.04    0.57  10
   6  -7  -7   51.00    0.58  10
  -1 -13  -2   19.36    0.57  10
   0 -13  -3   37.56    0.68  10
   1 -13  -4   39.95    0.73  10
   1 -12 -14    0.12    0.11  10
   2 -13  -6    0.39    0.43  10
   3 -11  -4  262.17    1.41  10
   3 -10  -3  280.53    1.36  10
   4 -11  -6   34.18    0.64  10
   5 -10 -13    2.70    0.31  10
   5 -10  -7   32.84    0.62  10
   5  -8  -5   66.87    0.67  10
   6  -9  -9    4.00    0.41  10
   1 -14  -9   15.98    0.39  10
   1 -14  -8    2.33    0.32  10
   1 -14  -7   50.30    0.71  10
   2 -13 -12    0.10    0.21  10
   3 -13 -10    5.91    0.43  10
   3 -13  -9    0.20    0.40  10
   3 -12 -13    2.08    0.22  10
   3 -12  -5   67.22    0.82  10
   3  -9  -2   87.55    0.74  10
   4 -12 -11    7.90    0.39  10
   5 -11  -9   20.84    0.57  10
   6  -9  -8    6.21    0.47  10
   6  -8  -7    7.68    0.35  10
  -3 -15  -6    1.54    0.22  10
   0 -14 -11    0.21    0.12  10
   0 -13 -13    1.26    0.10  10
   0 -13 -13    0.01    0.05  10
   0 -12  -1   78.89    0.83  10
   1 -14 -10    0.12    0.20  10
   1 -12  -2    4.95    0.44  10
   1 -11  -1    3.64    0.37  10
   2 -13  -5   36.12    0.70  10
   2 -12 -14    0.90    0.14  10
   2 -11  -2    1.39    0.34  10
   4 -12 -12   10.37    0.38  10
   4 -12  -7    0.40    0.45  10
   4 -10  -4   71.75    0.76  10
   5 -11 -12  102.60    0.84  10
   5 -11  -8   10.68    0.48  10
   5 -10 -14   20.68    0.41  10
   5 -10  -6    5.04    0.39  10
   5  -9  -5   12.15    0.41  10
   6 -10 -10   89.05    0.90  10
  -4 -15  -6    0.65    0.14  10
  -4 -15  -5    6.97    0.25  10
  -3 -15  -7    2.39    0.16  10
  -3 -15  -7    0.10    0.08  10
  -3 -15  -5    0.11    0.21  10
  -3 -13   0   38.89    0.60  10
  -1 -12   0    0.59    0.32  10
   1 -13 -13    0.02    0.05  10
   1 -13  -3   19.98    0.55  10
   1 -10   0   65.14    0.66  10
   2 -14  -9    0.04    0.32  10
   2 -10  -1    0.12    0.31  10
   4 -11 -14    2.11    0.19  10
   5 -11  -7   21.35    0.59  10
   5  -8  -4  181.49    1.01  10
   6 -10  -9    7.01    0.47  10
   6  -9  -7   76.50    0.78  10
   7  -7  -9    0.18    0.32  10
  -4 -15  -7    0.72    0.11  10
  -3 -15  -8    0.23    0.11  10
  -3 -15  -4   10.43    0.37  10
  -1 -15  -7    0.35    0.21  10
  -1 -15  -7    0.05    0.13  10
   0 -10   1    0.99    0.27  10
   1 -14 -11    5.87    0.21  10
   2 -14 -10    2.86    0.25  10
   2 -14  -7    0.35    0.40  10
   2 -13  -4    3.05    0.47  10
   3 -13 -12    6.23    0.30  10
   3 -13  -6   21.54    0.59  10
   3 -11 -15    0.25    0.11  10
   3 -10  -2   16.61    0.44  10
   4 -12  -6  125.42    1.06  10
   5 -11 -13    0.66    0.26  10
   6 -10  -8   87.29    0.86  10
   7  -8 -11   62.78    0.70  10
   7  -8 -10   51.85    0.65  10
   7  -6  -8   51.09    0.58  10
  -2 -15  -9    0.42    0.10  10
  -2 -15  -4    2.76    0.32  10
  -2 -13   0   33.55    0.61  10
  -2 -12   1   19.04    0.46  10
  -1 -15  -5    0.84    0.30  10
  -1 -14  -2    3.15    0.46  10
   0 -15  -8    1.24    0.23  10
   0 -15  -7   21.80    0.44  10
   0 -14  -3   18.01    0.51  10
   2 -13 -13    0.27    0.10  10
   2 -13 -13    0.03    0.06  10
   3 -12 -14    3.82    0.18  10
   4 -13 -10   -0.07    0.33  10
   4 -13  -9   94.45    0.88  10
   4 -12 -13    0.85    0.17  10
   4 -12 -13    0.11    0.10  10
   4 -10  -3   36.64    0.58  10
   5  -9  -4  285.33    1.34  10
   6 -10 -13    0.19    0.28  10
   6  -9  -6   27.99    0.57  10
  -1 -10   2   46.72    0.55  10
   0 -15  -6    0.07    0.30  10
   0 -12   0   38.90    0.65  10
   1 -13  -2   60.73    0.82  10
   1 -12  -1  107.80    0.95  10
   1 -11   0   93.67    0.86  10
   2 -14 -11    0.08    0.13  10
   2 -14 -11    0.02    0.08  10
   2 -12  -2  158.79    1.13  10
   2 -11  -1  102.34    0.89  10
   3  -9  -1   35.06    0.52  10
   4 -12  -5    0.36    0.43  10
   5 -12  -8    2.55    0.41  10
   6 -11 -10    0.60    0.36  10
   6 -11  -9    3.53    0.48  10
   6 -10  -7   39.71    0.65  10
   7  -9 -10   84.17    0.81  10
   7  -8  -8    4.92    0.35  10
  -1 -15 -10    0.46    0.08  10
  -1 -15  -4   19.98    0.47  10
   0 -15  -5   28.68    0.53  10
   0 -13  -1   24.78    0.59  10
   0 -11   1   32.75    0.57  10
   1 -15  -8   17.97    0.39  10
   1 -15  -7    0.42    0.32  10
   1 -14 -12    0.02    0.05  10
   2 -13  -3    9.77    0.49  10
   3 -14 -10    0.69    0.26  10
   3 -14  -9   85.47    0.78  10
   3 -14  -7   60.01    0.77  10
   3 -12  -3   10.00    0.49  10
   3 -11  -2  486.29    1.83  10
   4  -9  -2    8.67    0.35  10
   5 -12  -7    7.94    0.47  10
   5 -11  -5   49.77    0.76  10
   6 -11 -12   25.37    0.52  10
   6 -11  -8    8.98    0.49  10
   7  -9  -9    0.82    0.37  10
   7  -7  -7   19.41    0.41  10
  -1 -13   0    7.40    0.41  10
   0 -15 -10    0.26    0.10  10
   0 -14  -2    4.10    0.45  10
   1 -15  -9   -0.00    0.08  10
   1 -15  -6    4.19    0.36  10
   1 -14  -3   23.49    0.57  10
   2 -10   0  440.30    1.60  10
   3 -14 -11   18.83    0.37  10
   3 -13  -4   95.89    0.94  10
   4 -13 -12    0.11    0.17  10
   4 -13 -12    0.13    0.11  10
   4 -13  -6    0.28    0.43  10
   4 -12 -14    2.45    0.17  10
   4 -11  -3   14.15    0.49  10
   5 -10  -4   44.81    0.65  10
   6 -10  -6   23.30    0.54  10
   6  -9  -5    9.08    0.42  10
   7  -9  -8  206.03    1.21  10
   7  -8  -7   15.32    0.43  10
  -1 -14  -1   81.82    0.85  10
   0 -15  -4    4.40    0.36  10
   1 -15 -10    0.56    0.13  10
   3 -14  -6    8.80    0.49  10
   4 -12  -4  286.67    1.53  10
   5 -13  -9   22.91    0.55  10
   5 -12  -6   21.66    0.58  10
   5  -9  -3    1.21    0.29  10
   7 -10 -11   29.91    0.55  10
  -1 -11   2   46.70    0.58  10
   1 -12   0   -0.01    0.41  10
   2 -15  -8    0.35    0.19  10
   2 -15  -7   53.25    0.62  10
   2 -12  -1   17.73    0.50  10
   3 -12  -2  114.55    1.02  10
   4 -14  -8   25.35    0.56  10
   4 -13  -5  288.74    1.52  10
   5 -13 -11    5.55    0.33  10
   5 -11  -4  302.47    1.55  10
   6 -12 -11    4.22    0.36  10
   6 -12 -10    3.66    0.36  10
   6  -8  -4   21.26    0.44  10
   7 -10  -8   27.17    0.64  10
   7  -9  -7   14.31    0.47  10
   7  -7  -6   46.91    0.56  10
   0 -15  -3   20.23    0.51  10
   1 -15  -4    9.22    0.45  10
   1 -14  -2   17.18    0.56  10
   2 -15  -6    0.11    0.31  10
   2 -11   0   15.79    0.46  10
   3 -14 -12    0.17    0.12  10
   3 -13  -3   41.96    0.69  10
   3 -11  -1    6.77    0.39  10
   3  -9   0  117.22    0.83  10
   4 -14 -10    2.28    0.23  10
   4 -14  -7   11.61    0.52  10
   4 -13 -13    1.04    0.12  10
   5 -12  -5   38.02    0.67  10
   5 -10  -3  196.56    1.19  10
   6 -12  -8    6.41    0.45  10
   6 -11  -6   12.97    0.50  10
   7  -8  -6    5.05    0.34  10
   8  -8 -10   44.87    0.65  10
  -2 -16  -6    2.40    0.14  10
  -2 -16  -5    1.95    0.18  10
  -1 -16  -7    4.47    0.19  10
  -1 -16  -6    0.29    0.15  10
  -1 -15  -2   56.75    0.68  10
   0 -14  -1    1.08    0.37  10
   1 -11   1    3.50    0.33  10
   2 -15  -5   35.03    0.61  10
   2 -14  -3   22.50    0.57  10
   4 -14 -11    0.11    0.18  10
   4 -13  -4    0.17    0.49  10
   4 -12  -3    6.55    0.47  10
   4 -11  -2   30.83    0.59  10
   5  -8  -2   32.13    0.49  10
   6  -9  -4    0.79    0.32  10
   7 -11  -9   38.42    0.63  10
   7 -10  -7    5.22    0.40  10
   7  -9  -6  106.98    0.90  10
   8  -8  -9   -0.26    0.38  10
  -3 -16  -5    1.73    0.13  10
  -3 -16  -5    0.08    0.05  10
  -2 -16  -4   13.70    0.32  10
  -1 -14   0    1.71    0.39  10
  -1 -13   1    2.65    0.36  10
   0 -16  -8    0.38    0.11  10
   2 -15 -11    1.91    0.12  10
   3 -15  -8   13.61    0.34  10
   3 -15  -7    1.30    0.27  10
   3 -10   0   11.13    0.41  10
   4 -14  -6   72.66    0.81  10
   5 -13  -6   18.17    0.55  10
   5 -12 -14    0.20    0.12  10
   5 -12 -14    0.02    0.06  10
   5  -9  -2  142.40    0.97  10
   7 -11 -12   32.92    0.50  10
   7  -7  -5   13.76    0.37  10
   8  -9 -10   52.50    0.66  10
   8  -7  -8    0.38    0.26  10
  -3 -16  -4    1.92    0.15  10
  -2 -15  -1   50.05    0.59  10
  -1 -16  -4    0.21    0.20  10
   0 -15  -2    4.63    0.39  10
   1 -16  -7    5.97    0.23  10
   1 -15  -3    1.12    0.34  10
   1 -13   0    8.37    0.52  10
   2 -15  -4   13.08    0.50  10
   2 -12   0    4.99    0.48  10
   2 -10   1    0.71    0.28  10
   3 -15 -10   10.25    0.25  10
   3 -15 -10    0.94    0.11  10
   4 -10  -1   38.30    0.58  10
   5 -14  -9    4.69    0.35  10
   5 -12  -4    0.63    0.42  10
   5 -11  -3  200.21    1.27  10
   6 -13  -9    7.34    0.39  10
   6 -12 -13    4.14    0.23  10
   6  -8  -3   28.53    0.49  10
   7 -11  -7   40.69    0.72  10
   7 -10  -6    1.72    0.38  10
   8  -9  -9   14.62    0.45  10
   8  -8  -8  151.36    1.02  10
  -2 -16  -3    1.04    0.21  10
  -1 -15  -1    1.31    0.35  10
   1 -16  -8    0.09    0.10  10
   1 -14  -1    4.31    0.40  10
   1 -10   2   35.01    0.51  10
   2 -14  -2    4.02    0.42  10
   4 -13  -3   67.36    0.84  10
   4 -12  -2  244.72    1.40  10
   5 -14 -10    6.25    0.30  10
   5 -13 -13    0.12    0.10  10
   5 -13 -13    0.04    0.06  10
   5 -13  -5    3.57    0.48  10
   5 -10  -2   10.29    0.43  10
   6 -13 -11   36.12    0.48  10
   6 -13  -8    0.02    0.37  10
   7 -11 -13    0.26    0.20  10
   7  -9  -5   51.87    0.68  10
   8 -10 -10   17.96    0.51  10
   8  -9  -8    1.39    0.36  10
   8  -8  -7   22.95    0.51  10
   8  -7  -7  145.65    0.94  10
  -1 -16  -3    7.62    0.31  10
   0 -14   0   49.53    0.71  10
   0 -13   1   26.44    0.55  10
   1 -16  -9    3.07    0.13  10
   1 -16  -5   11.11    0.36  10
   2 -11   1  129.78    0.99  10
   3 -15 -11    0.08    0.09  10
   3 -15  -5   22.61    0.51  10
   3 -11   0  149.80    1.05  10
   4 -15  -9    5.95    0.26  10
   4 -15  -8    2.38    0.25  10
   4 -11  -1    3.04    0.38  10
   5 -14  -7    2.12    0.39  10
   6 -13 -12    0.26    0.18  10
   6 -12  -5    5.62    0.49  10
   6 -11  -4   37.82    0.66  10
   7 -12 -11    1.90    0.24  10
   7 -11  -6    3.86    0.48  10
   8 -10  -9   34.79    0.61  10
   0 -12   2    4.16    0.44  10
   0 -10   3   96.03    0.77  10
   1 -15  -2    7.28    0.39  10
   2 -16  -7    7.52    0.25  10
   2 -16  -6   26.53    0.45  10
   2 -15  -3   28.69    0.55  10
   3  -9   1   24.61    0.46  10
   4 -15 -10    1.60    0.15  10
   4 -15  -7    2.46    0.24  10
   4  -9   0   23.04    0.46  10
   5 -13  -4    3.87    0.46  10
   5 -12  -3   54.58    0.76  10
   5 -11  -2  424.59    1.81  10
   5  -8  -1  190.89    1.05  10
   6 -10  -3    0.70    0.40  10
   7 -12 -12    3.91    0.28  10
   7 -12  -7    4.77    0.49  10
   7 -10  -5   16.77    0.50  10
   7  -8  -4   20.86    0.47  10
   7  -7  -4    3.76    0.28  10
   8 -10  -8   83.10    0.85  10
   8  -9  -7   10.13    0.46  10
  -2 -16  -2   17.41    0.35  10
  -1 -14   1    2.32    0.38  10
   0 -15  -1   12.49    0.42  10
   1 -16  -4   10.95    0.34  10
   2 -14  -1  107.02    0.98  10
   2 -13   0   35.34    0.70  10
   2  -9   2   28.76    0.46  10
   3 -15  -4    3.61    0.37  10
   3 -13  -1  167.03    1.18  10
   5 -14 -12    0.86    0.13  10
   5  -9  -1   97.36    0.82  10
   7  -9  -4  163.28    1.09  10
   8 -11 -11   11.69    0.42  10
   8 -10  -7   23.41    0.60  10
   8  -7  -6   17.31    0.42  10
  -1 -16  -2    6.14    0.30  10
   1 -14   0    1.71    0.43  10
   1 -13   1    8.94    0.51  10
   3 -14  -2   22.77    0.57  10
   3 -12   0   61.77    0.76  10
   3 -10   1   69.89    0.73  10
   4 -15 -11    0.18    0.10  10
   4 -13  -2    1.73    0.42  10
   4 -12  -1  138.09    1.08  10
   5 -14  -5   19.60    0.53  10
   5 -10  -1   87.08    0.87  10
   6 -14 -10   11.64    0.36  10
   6 -14  -8    3.34    0.38  10
   6 -12  -4    3.11    0.45  10
   6 -11  -3  108.13    0.97  10
   7 -12 -13    1.95    0.18  10
   8 -11 -12    9.12    0.34  10
   8 -11  -8   48.71    0.69  10
   8  -9  -6   -0.04    0.36  10
  -1 -15   0    8.98    0.35  10
   1 -15  -1   45.24    0.67  10
   2 -15  -2   54.06    0.68  10
   3 -16  -9    0.32    0.10  10
   3 -16  -7   18.06    0.33  10
   3 -16  -6    0.63    0.22  10
   4 -15  -5   35.11    0.57  10
   5 -15  -9    3.32    0.22  10
   5 -15  -8    1.89    0.23  10
   5 -13  -3    4.96    0.49  10
   5 -12  -2    0.61    0.41  10
   6 -14 -11    0.57    0.17  10
   6 -14  -7    0.09    0.35  10
   7 -13  -8    3.16    0.37  10
   8 -10  -6    4.08    0.48  10
   9  -8  -9   71.57    0.72  10
   0 -16  -2    9.07    0.35  10
   3 -11   1   17.25    0.50  10
   4 -11   0   18.86    0.51  10
   5 -15 -10    0.60    0.13  10
   5 -15  -7   24.71    0.44  10
   5 -11  -1  420.83    1.80  10
   6 -10  -2  212.75    1.28  10
   7  -8  -3   43.85    0.60  10
   7  -7  -3    0.86    0.27  10
   8 -11  -7   38.43    0.66  10
   8  -8  -5   74.02    0.76  10
   9  -9  -9   58.22    0.68  10
   9  -8  -8    0.19    0.38  10
   9  -7  -8    8.71    0.38  10
   1 -10   3    2.83    0.28  10
   2 -11   2   27.21    0.52  10
   3 -14  -1    3.60    0.44  10
   3 -13   0   38.78    0.71  10
   5 -15  -6   18.46    0.42  10
   6 -14  -6    2.42    0.39  10
   6 -13  -4    0.68    0.45  10
   7 -13 -12   16.72    0.31  10
   7 -12  -5    3.09    0.46  10
   7 -11  -4    7.28    0.48  10
   7  -9  -3    3.31    0.38  10
   8 -12 -11   26.55    0.44  10
   8 -11  -6    2.39    0.49  10
   8  -9  -5   11.82    0.47  10
   9 -10 -11   71.77    0.73  10
   9  -9  -8  185.49    1.16  10
  -1 -16  -1    1.00    0.22  10
   0 -17  -5    3.20    0.17  10
   2 -14   0   17.91    0.50  10
   2 -13   1   23.53    0.55  10
   4 -16  -8    1.47    0.15  10
   4 -13  -1   29.13    0.61  10
   4  -9   1  229.47    1.21  10
   5 -15 -11    1.05    0.10  10
   5 -13  -2    7.51    0.53  10
   6 -14 -12    3.37    0.15  10
   6 -11  -2    4.85    0.43  10
   6  -8  -1   24.76    0.46  10
   7 -10  -3    4.69    0.42  10
   8 -10  -5   63.11    0.78  10
   9  -8  -7   43.24    0.61  10
   9  -7  -7    0.88    0.31  10
   0 -12   3    0.47    0.32  10
   1 -14   1   86.30    0.84  10
   1 -11   3   12.22    0.43  10
   3 -16  -4    3.29    0.29  10
   3 -15  -2   16.84    0.48  10
   3 -12   1   88.58    0.90  10
   4 -16  -9   -0.04    0.07  10
   4 -16  -9    0.01    0.04  10
   4 -16  -6   10.86    0.29  10
   4 -12   0  160.10    1.16  10
   4 -10   1    3.53    0.37  10
   5 -10   0  102.20    0.90  10
   6 -14  -5   -0.16    0.39  10
   6  -9  -1  185.74    1.15  10
   7 -14  -8    3.91    0.33  10
   7 -12  -4    8.22    0.49  10
   8  -8  -4    6.59    0.38  10
   8  -7  -4   90.46    0.79  10
   9 -11 -10   35.02    0.56  10
   9  -9  -7   28.32    0.58  10
   0 -17  -4    0.52    0.13  10
   0 -16  -1   30.21    0.46  10
   1 -17  -5    0.33    0.10  10
   1 -17  -5    0.05    0.05  10
   1 -15   0   10.95    0.41  10
   1 -13   2   16.67    0.48  10
   2  -9   3  121.42    0.85  10
   3 -10   2    0.46    0.31  10
   4 -16  -5    1.94    0.25  10
   6 -15 -10    4.71    0.20  10
   6 -15  -9    3.89    0.19  10
   6 -15  -8    0.63    0.16  10
   6 -15  -7    9.08    0.32  10
   6 -13  -3    4.52    0.46  10
   6 -10  -1   42.82    0.67  10
   7 -14  -7    3.11    0.38  10
   7 -11  -3    3.88    0.44  10
   7  -8  -2    0.46    0.30  10
   7  -7  -2  108.19    0.84  10
   8 -13 -10   12.02    0.35  10
   8 -12  -6   58.67    0.77  10
   8 -11  -5   29.59    0.62  10
   8  -6  -4   13.70    0.37  10
   9 -10  -7   50.95    0.72  10
   9  -7  -6  217.31    1.20  10
   1 -17  -4    0.25    0.13  10
   2 -17  -6    1.91    0.13  10
   2 -16  -2    2.18    0.29  10
   2 -10   3   55.45    0.67  10
   3 -16  -3    2.08    0.31  10
   4 -11   1    4.37    0.39  10
   5 -11   0  111.89    0.99  10
   6 -14  -4    2.78    0.43  10
   7 -14 -11   12.76    0.26  10
   8 -13  -8    0.61    0.30  10
   8 -10  -4    5.22    0.43  10
   9  -9  -6   14.34    0.51  10
   9  -6  -6    8.78    0.36  10
   0 -17  -3   14.84    0.27  10
   0 -15   1   11.72    0.37  10
   1 -16  -1    2.45    0.30  10
   1 -12   3   52.30    0.70  10
   3 -15  -1    8.30    0.43  10
   3 -13   1    0.20    0.36  10
   4 -15  -2    8.98    0.46  10
   5 -16  -9    0.14    0.09  10
   5 -16  -8    2.74    0.17  10
   5 -16  -7    1.58    0.17  10
   5 -13  -1    1.11    0.44  10
   6 -15  -6    5.68    0.27  10
   6 -15  -6    2.25    0.18  10
   6 -11  -1    8.60    0.48  10
   7 -12  -3    4.02    0.54  10
   8 -13  -7   54.04    0.68  10
   8 -12  -5   63.91    0.83  10
   9 -12 -10    3.89    0.32  10
   9 -11  -7    2.38    0.36  10
   9 -10  -6    2.80    0.41  10
   1  -9   4    3.95    0.28  10
   2 -15   0   13.43    0.44  10
   2 -13   2    3.15    0.46  10
   2 -11   3    3.73    0.41  10
   4 -16  -4    1.32    0.25  10
   4 -12   1   22.24    0.62  10
   4  -8   2   65.64    0.67  10
   5 -16  -6    5.58    0.23  10
   5 -12   0   67.92    0.86  10
   5  -9   1   71.53    0.75  10
   5  -8   1    2.68    0.31  10
   6 -15  -5    7.18    0.35  10
   6  -8   0    9.87    0.38  10
   7 -11  -2   18.43    0.61  10
   8 -13  -6    3.20    0.45  10
   8 -11  -4   19.28    0.56  10
   8  -9  -3   76.48    0.82  10
   8  -8  -3    1.51    0.35  10
   8  -7  -3   54.57    0.65  10
   9 -12 -11    2.45    0.24  10
   9 -12  -9    3.09    0.30  10
   9 -12  -8    3.93    0.38  10
   9  -8  -5   12.32    0.44  10
  10  -9  -9  128.15    0.98  10
   0 -16   0    4.55    0.27  10
   1 -17  -3    0.59    0.12  10
   1 -17  -3    0.10    0.07  10
   1 -15   1    0.67    0.34  10
   1 -10   4    0.19    0.25  10
   3 -17  -6    0.71    0.07  10
   3 -16  -2    2.17    0.30  10
   3 -12   2   43.26    0.69  10
   4 -10   2    9.67    0.50  10
   5 -10   1   20.91    0.52  10
   6  -9   0   44.44    0.66  10
   6  -7   0   35.37    0.52  10
   7 -14  -5    3.11    0.39  10
   8 -10  -3   19.96    0.56  10
   8  -6  -3    5.13    0.29  10
   9 -11  -6   37.72    0.65  10
   9 -10  -5  101.53    0.99  10
  10 -10 -10   17.47    0.44  10
  10  -9  -8   35.73    0.62  10
  10  -8  -8   43.16    0.65  10
   0 -17  -2   10.14    0.24  10
   2 -16  -1    2.92    0.27  10
   3 -17  -5    0.10    0.09  10
   3 -17  -5   -0.02    0.05  10
   4 -16  -3    1.63    0.27  10
   5 -16  -5   10.79    0.28  10
   6 -10   0  173.57    1.20  10
   7 -15  -9    0.06    0.12  10
   7 -15  -9    0.07    0.07  10
   7 -15  -8    9.65    0.26  10
   7 -15  -7    7.95    0.29  10
   7  -8  -1   90.23    0.83  10
   7  -7  -1   22.25    0.47  10
   8 -14 -10    1.08    0.16  10
   8 -14  -9   -0.03    0.16  10
   8 -14  -9   -0.13    0.10  10
   8 -13  -5   34.39    0.65  10
   8 -12  -4   63.84    0.80  10
   1 -16   0    2.42    0.29  10
   1 -13   3    0.96    0.34  10
   1 -11   4    8.50    0.42  10
   2 -17  -3    0.69    0.16  10
   2 -12   3    1.21    0.35  10
   3 -17  -4    3.76    0.20  10
   4 -15  -1   43.26    0.62  10
   4 -13   1   20.33    0.61  10
   4 -11   2    0.30    0.40  10
   5 -13   0   94.65    0.97  10
   5 -11   1   28.45    0.62  10
   6 -16  -8    5.99    0.20  10
   6 -11   0   39.77    0.71  10
   7 -15 -10    6.00    0.18  10
   7 -14  -4    0.74    0.38  10
   7 -12  -2   25.01    0.64  10
   7 -10  -1   47.84    0.73  10
   8 -11  -3    4.96    0.46  10
   9 -13  -9    0.36    0.24  10
   9 -11  -5   55.11    0.76  10
   9  -9  -4  137.03    1.11  10
   9  -8  -4    3.17    0.39  10
   9  -7  -4   13.81    0.46  10
  10 -10  -8   16.72    0.48  10
  10  -9  -7   17.26    0.51  10
  10  -8  -7   57.30    0.71  10
  10  -7  -7   25.04    0.52  10
   1 -17  -2    1.29    0.15  10
   1 -17  -2    0.16    0.07  10
   2 -15   1   46.87    0.66  10
   2  -9   4   16.40    0.41  10
   3 -13   2  128.71    1.07  10
   3 -11   3   43.36    0.70  10
   4 -17  -6    3.11    0.14  10
   5 -16  -4    4.10    0.22  10
   5 -16  -4    1.14    0.13  10
   6 -16  -7    0.17    0.07  10
   7 -15  -6    7.79    0.29  10
   7 -11  -1   43.50    0.77  10
   8 -14 -11    1.15    0.12  10
   8 -14  -6   62.32    0.72  10
   8  -9  -2    3.95    0.41  10
   8  -8  -2   29.03    0.56  10
   8  -7  -2    4.18    0.35  10
   9 -13 -10    4.02    0.20  10
   9 -13  -8    6.61    0.33  10
   9 -10  -4   58.33    0.82  10
  10 -11 -10   -0.13    0.26  10
  10 -11  -8    1.07    0.37  10
   2 -10   4    5.30    0.35  10
   3 -16  -1    7.46    0.31  10
   4 -17  -5    0.35    0.12  10
   4 -16  -2   22.95    0.45  10
   4 -12   2   29.61    0.65  10
   5 -12   1    4.23    0.44  10
   6 -12   0  297.81    1.60  10
   6  -8   1   59.31    0.72  10
   7 -15  -5    1.29    0.26  10
   8 -13  -4    3.57    0.41  10
   8 -10  -2    5.28    0.46  10
   8  -6  -2  128.64    0.93  10
   9 -13 -11   11.65    0.27  10
   9 -13  -7    6.78    0.36  10
   9  -6  -4   37.13    0.55  10
  10  -9  -6    2.02    0.42  10
  10  -7  -6   11.46    0.48  10
   2 -17  -2    0.58    0.15  10
   2 -16   0    4.26    0.31  10
   2 -13   3   89.29    0.88  10
   3 -17  -3    0.84    0.15  10
   4  -8   3    3.55    0.36  10
   5 -16  -3   22.75    0.44  10
   5  -9   2   11.24    0.44  10
   6 -16  -5   -0.02    0.16  10
   6 -10   1   18.16    0.58  10
   6  -9   1   34.34    0.61  10
   6  -7   1  259.82    1.28  10
   7 -14  -3    6.35    0.44  10
   7 -12  -1   70.54    0.91  10
   7  -9   0   12.53    0.54  10
   7  -8   0  120.33    0.98  10
   8 -14  -5    2.80    0.34  10
   9 -13  -6   62.78    0.74  10
   9 -11  -4   70.40    0.85  10
   9  -8  -3    8.02    0.49  10
  10 -12  -9    0.45    0.29  10
  10 -10  -6   26.62    0.56  10
   1 -17  -1    0.02    0.13  10
   1 -15   2   55.40    0.62  10
   2 -11   4    4.81    0.40  10
   3 -12   3   96.60    0.91  10
   4 -17  -4   -0.11    0.10  10
   5 -15  -1   30.27    0.56  10
   7  -7   0   50.10    0.63  10
   8 -15  -8    1.19    0.17  10
   9  -9  -3   40.66    0.70  10
   9  -7  -3   18.24    0.49  10
   9  -5  -4   34.07    0.50  10
  10 -12 -10   14.97    0.33  10
  10  -9  -5   53.21    0.80  10
  10  -6  -6  110.14    0.87  10
   3 -15   1    0.87    0.33  10
   3  -9   4  112.96    0.92  10
   3  -8   4   25.57    0.48  10
   4 -13   2   14.12    0.54  10
   5 -11   2  110.79    1.00  10
   6 -15  -2   13.38    0.45  10
   6 -14  -1    3.35    0.43  10
   6 -11   1   16.09    0.55  10
   7 -15  -4    1.35    0.25  10
   8 -15  -9    8.49    0.21  10
   8 -14  -4    1.45    0.36  10
   8 -13  -3   43.01    0.70  10
   8 -12  -2   21.32    0.67  10
   8  -9  -1  317.19    1.61  10
   9 -14  -9   12.34    0.29  10
   9 -14  -8   -0.04    0.21  10
   9 -13  -5   17.42    0.52  10
  10 -12  -7    0.49    0.34  10
  10 -10  -5   13.20    0.52  10
  10  -7  -5   10.31    0.41  10
   2 -12   4    4.87    0.44  10
   3 -17  -2    1.96    0.17  10
   3 -16   0    7.59    0.32  10
   3 -10   4    0.76    0.35  10
   4 -16  -1    0.17    0.13  10
   5 -17  -5   -0.03    0.08  10
   5 -16  -2    5.39    0.30  10
   7 -16  -8    0.56    0.08  10
   7 -16  -8    0.01    0.04  10
   7 -16  -7   10.86    0.24  10
   7 -14  -2    3.76    0.42  10
   7 -11   0  121.62    1.09  10
   8 -10  -1    9.07    0.50  10
   9 -14 -10    1.57    0.14  10
   9 -11  -3    0.56    0.45  10
  10  -6  -5    3.56    0.38  10
  11 -10  -9   15.84    0.43  10
  11  -9  -8    4.42    0.41  10
   2 -17  -1    9.01    0.25  10
   2 -17  -1    0.25    0.09  10
   2 -15   2   22.96    0.46  10
   3 -13   3    3.25    0.41  10
   6 -12   1    9.93    0.50  10
   7 -16  -6    0.86    0.09  10
   8 -11  -1   93.18    0.99  10
   8  -6  -1    8.18    0.37  10
   9 -14  -6    0.71    0.30  10
   9  -9  -2   59.46    0.80  10
   9  -8  -2   85.08    0.89  10
  10 -13  -9    3.02    0.22  10
  10 -12  -6   61.84    0.72  10
  10  -9  -4  138.42    1.12  10
  10  -8  -4   61.70    0.80  10
  11 -10  -8    1.92    0.37  10
  11  -9  -7   51.05    0.71  10
  11  -8  -7    5.12    0.42  10
   2 -16   1    0.39    0.22  10
   2  -8   5   41.09    0.56  10
   3 -11   4   44.81    0.68  10
   4 -12   3   14.30    0.52  10
   5 -17  -4    3.68    0.17  10
   5 -15   0   18.49    0.47  10
   5 -14   1   26.03    0.60  10
   5  -9   3    0.89    0.38  10
   5  -8   3  112.51    0.94  10
   6 -10   2    5.22    0.51  10
   6  -9   2    7.85    0.43  10
   7 -16  -5    0.95    0.16  10
   7 -12   0   74.95    0.90  10
   7  -9   1    1.71    0.45  10
   7  -8   1  142.82    1.09  10
   8 -14  -3    4.72    0.40  10
   8 -13  -2   22.01    0.58  10
   9 -13  -4   47.11    0.67  10
   9 -10  -2   33.06    0.67  10
   9  -7  -2  139.20    1.06  10
   9  -5  -3   65.04    0.68  10
  10 -13 -10    1.54    0.17  10
  10 -10  -4   73.33    0.87  10
  11 -11  -9   14.06    0.40  10
   2 -13   4    0.68    0.38  10
   4 -17  -2    0.16    0.14  10
   5  -7   3    0.40    0.31  10
   7 -10   1    6.67    0.49  10
   7  -7   1  420.51    1.74  10
   8 -12  -1   12.95    0.55  10
   8  -9   0    0.82    0.42  10
   8  -5  -1  550.50    1.82  10
   9  -6  -2    0.05    0.31  10
  10  -6  -4   31.21    0.59  10
  10  -5  -5  113.59    0.87  10
  11 -11  -8   22.16    0.46  10
  11  -9  -6   11.13    0.51  10
  11  -8  -6    0.12    0.46  10
   2 -11   5   11.87    0.50  10
   3 -17  -1    0.27    0.13  10
   3 -17  -1    0.10    0.07  10
   3 -15   2   18.09    0.47  10
   3 -12   4    3.67    0.41  10
   4 -16   0    1.61    0.23  10
   4  -7   4  270.39    1.33  10
   5 -16  -1    4.16    0.27  10
   5 -11   3   23.67    0.64  10
   6 -11   2    8.14    0.50  10
   6  -6   2   48.55    0.61  10
   7 -16  -4    0.21    0.15  10
   7 -15  -2    4.20    0.32  10
   7 -14  -1   11.40    0.47  10
   7 -11   1    1.05    0.48  10
   8 -15  -4    2.72    0.24  10
   8 -10   0   41.29    0.73  10
   8  -7   0  242.54    1.37  10
  10 -13  -6    1.58    0.29  10
  11 -11  -7   11.04    0.42  10
  11  -7  -6   66.88    0.80  10
   2 -17   0   -0.07    0.13  10
   3 -16   1    8.19    0.33  10
   5 -17  -3    0.04    0.08  10
   5 -17  -3    0.02    0.05  10
   6 -16  -2    9.96    0.30  10
   8 -14  -2   27.53    0.54  10
   8 -11   0   62.93    0.86  10
   8  -6   0  114.77    0.97  10
   9 -15  -7    0.46    0.12  10
   9 -14  -4    0.31    0.28  10
  10 -10  -3    1.51    0.45  10
  10  -7  -3   31.88    0.61  10
  11 -12  -9    4.14    0.26  10
  11 -12  -8    2.55    0.30  10
  11 -11  -6   31.61    0.60  10
  11  -9  -5    4.80    0.50  10
  11  -8  -5   47.31    0.76  10
   3  -9   5    6.49    0.38  10
   4 -11   4    0.27    0.44  10
   5 -12   3    3.65    0.52  10
   6 -12   2   40.44    0.72  10
   7 -12   1    2.76    0.46  10
   8 -13  -1    9.13    0.49  10
   9 -15  -6    0.72    0.15  10
   9 -10  -1   46.62    0.77  10
  10 -14  -9    1.49    0.14  10
  10 -14  -8    0.59    0.15  10
  10 -13  -5   18.93    0.46  10
  10  -6  -3    1.47    0.38  10
  10  -5  -4   40.58    0.58  10
  11 -12  -7   18.86    0.45  10
   2 -12   5   13.65    0.45  10
   3 -10   5  129.44    1.02  10
   3  -7   5   90.84    0.77  10
   4 -17  -1    0.22    0.13  10
   5 -14   2    1.78    0.39  10
   6 -15   0    0.35    0.29  10
   6  -9   3   58.24    0.78  10
   7 -16  -3    3.95    0.20  10
   8 -16  -6    0.58    0.08  10
   8 -16  -6    0.09    0.04  10
   8 -15  -3    1.33    0.19  10
   8 -15  -3    0.39    0.12  10
   9 -11  -1   17.44    0.59  10
   9  -6  -1  101.90    0.93  10
  10 -14  -7    1.98    0.17  10
  10  -9  -2   47.25    0.80  10
   3 -17   0   -0.06    0.12  10
   3 -11   5    0.01    0.43  10
   4 -14   3    0.94    0.39  10
   5 -17  -2    1.44    0.15  10
   5 -17  -2    0.32    0.07  10
   5  -8   4    3.22    0.39  10
   6 -16  -1    2.46    0.23  10
   6  -7   3  105.25    0.92  10
   7 -15  -1   -0.15    0.26  10
   7 -13   1    2.62    0.49  10
   7 -10   2    2.25    0.45  10
   7  -7   2  124.91    1.02  10
   8 -16  -5    0.83    0.11  10
   8 -10   1    9.12    0.53  10
   8  -9   1    4.22    0.47  10
   8  -8   1  152.27    1.19  10
   8  -5   0   33.34    0.55  10
   9 -15  -5   -0.01    0.15  10
   9 -14  -3   19.44    0.42  10
   9 -13  -2   49.92    0.68  10
  10 -12  -3    0.37    0.39  10
  10  -8  -2   66.47    0.85  10
  10  -7  -2    3.19    0.49  10
  11 -12  -6    2.35    0.30  10
  11  -9  -4   40.29    0.70  10
  11  -8  -4  175.37    1.24  10
  11  -6  -5   37.58    0.62  10
   4 -16   1    4.86    0.23  10
   4 -16   1    1.24    0.13  10
   5 -10   4   60.49    0.80  10
   5  -7   4   25.85    0.54  10
   6 -11   3   10.80    0.54  10
   7 -11   2   19.86    0.59  10
   7  -6   2    4.70    0.41  10
   8 -14  -1    0.60    0.30  10
   8 -13   0   23.57    0.62  10
   8 -11   1    8.35    0.59  10
   8  -7   1  286.14    1.54  10
   9 -12  -1   11.07    0.51  10
   9  -4  -2    4.65    0.30  10
  10  -5  -3   56.31    0.69  10
  10  -4  -4   63.98    0.69  10
  11 -13  -9    0.76    0.14  10
  11 -13  -8    8.09    0.26  10
  11  -7  -4  127.36    1.05  10
  12 -10  -8    2.23    0.31  10
   2 -10   6   70.43    0.80  10
   2  -9   6    7.09    0.36  10
   2  -8   6  100.23    0.82  10
   3 -16   2    0.26    0.20  10
   3 -15   3    1.54    0.29  10
   3 -12   5   10.11    0.50  10
   4  -8   5    4.39    0.37  10
   5 -11   4   67.30    0.83  10
   7 -16  -2    0.58    0.16  10
   8 -16  -4    0.83    0.12  10
   8 -15  -2    7.64    0.29  10
   8  -6   1    2.19    0.35  10
   9 -15  -4    2.81    0.19  10
   9 -10   0   49.56    0.80  10
   9  -7   0    9.24    0.46  10
   9  -5  -1   24.21    0.51  10
  10 -14  -5    1.52    0.19  10
  10  -6  -2   43.00    0.67  10
  11 -13  -7    0.75    0.17  10
  11 -12  -5   14.20    0.41  10
  11 -11  -4   33.08    0.60  10
  12 -10  -7   10.80    0.43  10
   4  -7   5  107.47    0.89  10
   5  -6   4   26.78    0.52  10
   6 -12   3   43.56    0.70  10
  10 -13  -3   17.94    0.45  10
  10 -12  -2   61.76    0.77  10
  10  -8  -1   60.04    0.83  10
  11  -9  -3    1.89    0.44  10
  11  -8  -3   67.70    0.85  10
  12  -8  -6   18.09    0.50  10
   5 -17  -1    0.05    0.05  10
 -16  -4  -1    1.94    0.17  11
 -13  -2  -5    0.69    0.42  11
 -13   2  -5    1.26    0.38  11
 -12  -4  -5    4.64    0.49  11
 -12  -1  -6   -0.13    0.43  11
 -12   0  -6    1.03    0.51  11
 -12   1  -6   -0.39    0.47  11
 -12   4  -5    6.03    0.46  11
 -11   3  -6   19.75    0.71  11
 -11   5  -5    5.77    0.56  11
  -9  -5  -6   34.58    0.83  11
  -9  -3  -7   19.72    0.80  11
  -9   3  -7   22.54    0.82  11
  -8  -4  -7   18.57    0.70  11
  -7  -1  -8   15.89    0.78  11
  -7   1  -8   18.05    0.82  11
  -6   2  -8   85.50    1.16  11
  -5  -2  -8   15.60    0.64  11
  -5   4  -7   34.85    0.75  11
  -4   1  -8    1.13    0.45  11
 -16  -5   0    0.07    0.13  11
 -16  -1  -2    0.06    0.16  11
 -16   0  -2    3.45    0.25  11
 -16   1  -2    0.17    0.13  11
 -16   1  -2   -0.04    0.07  11
 -15  -2  -3    7.88    0.32  11
 -15   2  -3    5.63    0.27  11
 -15   4  -2    0.38    0.23  11
 -14  -2  -4    5.54    0.35  11
 -13  -1  -5    4.85    0.46  11
 -13   4  -4    1.07    0.40  11
 -11  -5  -5    6.42    0.50  11
 -11  -3  -6   18.57    0.69  11
 -10  -4  -6   27.38    0.81  11
  -6  -4  -7    4.01    0.61  11
  -6   0  -8   18.78    0.74  11
  -6   1  -8   -0.38    0.55  11
  -6   4  -7    3.98    0.52  11
  -5  -1  -8  120.04    1.27  11
  -5   1  -8  126.43    1.29  11
 -15  -4  -2    0.50    0.19  11
 -15  -4  -2    0.24    0.12  11
 -15  -1  -3    0.19    0.24  11
 -15   0  -3    7.15    0.37  11
 -14  -4  -3    1.74    0.36  11
 -14  -1  -4    4.42    0.37  11
 -14   4  -3    2.08    0.28  11
 -13  -4  -4    0.89    0.38  11
 -13   0  -5    1.11    0.38  11
 -13   0  -5    0.71    0.22  11
 -12   5  -4    0.68    0.43  11
 -11  -7  -3   45.99    0.71  11
 -11  -6  -4    1.14    0.44  11
  -9  -7  -4   19.17    0.58  11
  -9  -6  -5   59.10    0.89  11
  -9  -2  -7   52.13    1.01  11
  -8  -5  -6   42.63    0.90  11
  -8  -3  -7   77.98    1.14  11
  -8   5  -6   45.98    0.88  11
  -5  -5  -6    5.79    0.52  11
  -4  -3  -7   25.98    0.65  11
 -17  -2   0    0.23    0.10  11
 -16   3  -1    1.34    0.21  11
 -15  -6   0    0.61    0.21  11
 -15   5  -1    1.14    0.22  11
 -12  -5  -4    0.74    0.42  11
 -12  -3  -5    1.52    0.48  11
 -12   3  -5    0.89    0.45  11
  -9  -1  -7    1.87    0.69  11
  -9   0  -7   24.19    0.91  11
  -8  -6  -5    2.41    0.58  11
  -7  -5  -6   19.92    0.68  11
  -5  -3  -7    5.74    0.53  11
  -5   3  -7    5.13    0.48  11
 -14  -6  -1   -0.34    0.29  11
 -14   5  -2    0.07    0.29  11
 -13  -5  -3    0.54    0.34  11
 -13   3  -4    1.09    0.46  11
 -13   5  -3    0.63    0.37  11
 -12  -6  -3   -0.11    0.38  11
 -10  -5  -5   43.04    0.83  11
 -10  -3  -6    0.63    0.60  11
 -10   3  -6   -0.06    0.52  11
 -10   5  -5   46.83    0.86  11
  -9  -4  -6    8.04    0.66  11
  -9   4  -6    9.69    0.68  11
  -8   2  -7    1.93    0.61  11
  -6  -3  -7    6.33    0.55  11
  -6   3  -7    6.25    0.55  11
  -4  -2  -7    9.71    0.50  11
 -17  -1   0    0.10    0.06  11
 -17   1   0    0.12    0.12  11
 -17   1   0    0.02    0.07  11
 -15   3  -2    7.34    0.37  11
 -14   3  -3   12.87    0.48  11
 -13  -6  -2   -0.09    0.29  11
 -13  -6  -2   -0.26    0.17  11
 -12  -2  -5    4.44    0.60  11
 -12   2  -5    3.89    0.56  11
 -10  -6  -4    3.69    0.51  11
 -10  -2  -6   63.01    1.14  11
 -10   2  -6   70.29    1.17  11
  -8  -4  -6   79.77    1.17  11
  -8  -1  -7   19.05    0.78  11
  -7  -2  -7   20.88    0.77  11
  -5  -2  -7    3.96    0.48  11
  -5   2  -7    3.72    0.49  11
 -17  -3   1    0.94    0.15  11
 -16  -2  -1    0.20    0.18  11
 -16  -2  -1    0.12    0.10  11
 -16   2  -1    0.20    0.22  11
 -16   4   0   11.96    0.35  11
 -13   2  -4   17.02    0.68  11
 -12  -4  -4    3.30    0.52  11
 -12  -1  -5   17.12    0.73  11
 -12   1  -5   17.64    0.72  11
 -12   4  -4    3.53    0.59  11
 -10  -1  -6    3.87    0.77  11
 -10   1  -6    5.33    0.79  11
  -9  -5  -5    2.53    0.59  11
  -9  -3  -6   20.68    0.79  11
  -9   5  -5    2.83    0.63  11
  -7  -4  -6    3.12    0.63  11
  -7  -1  -7   16.07    0.75  11
  -7   1  -7   17.20    0.73  11
  -7   4  -6    2.96    0.60  11
  -6  -4  -6    5.07    0.61  11
  -6  -1  -7    4.99    0.69  11
  -6   1  -7    5.71    0.68  11
  -5  -4  -6    4.10    0.47  11
  -5  -1  -7    0.90    0.46  11
  -5   1  -7    0.27    0.47  11
  -5   4  -6    3.72    0.41  11
 -16  -5   1    3.73    0.25  11
 -16  -5   1    1.56    0.14  11
 -16  -1  -1    1.22    0.23  11
 -16   1  -1    1.10    0.25  11
 -15  -2  -2    4.94    0.35  11
 -14  -2  -3    7.14    0.47  11
 -14   2  -3    7.05    0.49  11
 -13  -4  -3   24.85    0.70  11
 -13  -1  -4    6.72    0.60  11
 -13   1  -4    6.06    0.65  11
 -10  -4  -5    0.39    0.60  11
 -10   0  -6    6.59    0.74  11
 -10   4  -5   -0.23    0.67  11
  -9  -6  -4    0.11    0.51  11
  -8  -5  -5   90.00    1.17  11
  -5   0  -7  110.52    1.18  11
 -17  -4   2   -0.07    0.15  11
 -15  -6   1   19.87    0.46  11
 -15   1  -2    7.86    0.49  11
 -15   4  -1    6.64    0.38  11
 -14  -4  -2   36.85    0.69  11
 -14  -1  -3    5.74    0.49  11
 -14   4  -2   32.67    0.69  11
 -11   2  -5    3.09    0.73  11
  -9  -2  -6    1.78    0.63  11
  -9   2  -6    1.61    0.68  11
  -8  -6  -4    3.70    0.60  11
  -8  -3  -6    9.62    0.65  11
  -7  -5  -5    0.93    0.54  11
  -6  -5  -5   57.62    0.90  11
 -17  -2   1    1.33    0.18  11
 -17   2   1    1.76    0.23  11
 -16  -3   0    0.81    0.28  11
 -14  -5  -1   24.80    0.60  11
 -13  -5  -2   21.32    0.66  11
 -12   5  -3   12.44    0.59  11
 -11  -1  -5   17.16    0.80  11
 -11   1  -5   18.20    0.87  11
 -10  -5  -4    1.49    0.59  11
  -9  -4  -5    3.23    0.62  11
  -8  -2  -6   63.86    1.13  11
  -7  -6  -4   29.06    0.69  11
  -7  -3  -6   30.37    0.78  11
  -7   3  -6   35.58    0.85  11
  -7   5  -5    0.24    0.47  11
  -6  -3  -6    0.04    0.50  11
  -6   3  -6   -0.10    0.49  11
  -5  -3  -6    8.29    0.53  11
 -16   3   0    0.38    0.24  11
 -15  -3  -1   -0.12    0.39  11
 -15   5   0   23.17    0.55  11
 -14   5  -1   25.75    0.62  11
 -13  -3  -3    4.97    0.58  11
 -13   3  -3    4.79    0.59  11
 -11  -4  -4    0.52    0.56  11
 -11   0  -5  227.34    1.84  11
 -11   4  -4    0.07    0.65  11
 -10  -6  -3   92.07    1.15  11
 -10   3  -5   44.89    0.94  11
  -9   4  -5    3.66    0.64  11
  -8   2  -6   63.87    1.06  11
 -17  -1   1    4.76    0.24  11
 -17   1   1    5.61    0.29  11
 -16  -4   1    1.10    0.28  11
 -15   3  -1   -0.07    0.34  11
 -14   3  -2    4.40    0.53  11
 -10  -2  -5    4.27    0.66  11
 -10   2  -5    3.47    0.76  11
  -9  -5  -4   25.62    0.84  11
  -8  -4  -5    1.63    0.64  11
  -8  -1  -6   28.06    0.87  11
  -8   0  -6  137.04    1.47  11
  -8   1  -6   31.27    0.89  11
  -8   4  -5    1.94    0.61  11
  -7  -2  -6    2.54    0.57  11
  -7   2  -6    3.20    0.59  11
  -6  -2  -6   15.30    0.62  11
  -6   2  -6   14.98    0.71  11
  -5  -2  -6    8.17    0.53  11
 -18  -1   3    0.17    0.14  11
 -18   1   3    0.10    0.11  11
 -17  -3   2    1.15    0.22  11
 -16  -5   2   -0.09    0.20  11
 -16   2   0    0.58    0.32  11
 -15  -2  -1    8.04    0.52  11
 -14  -2  -2   53.16    0.96  11
 -13   2  -3   14.07    0.70  11
 -11  -5  -3   76.81    1.07  11
 -10  -4  -4   86.37    1.23  11
 -10  -1  -5   67.68    1.16  11
 -10   1  -5   67.77    1.23  11
  -9  -6  -3    2.10    0.60  11
  -9  -3  -5    0.25    0.63  11
  -9   3  -5    0.87    0.78  11
  -9   5  -4   25.70    0.86  11
  -7   1  -6   50.85    0.96  11
  -6  -1  -6   37.89    0.81  11
  -6   1  -6   37.82    0.87  11
 -17  -4   3    3.68    0.28  11
 -17   3   2    0.92    0.21  11
 -16   0   0    0.89    0.34  11
 -15  -6   2    1.66    0.31  11
 -15  -4   0   16.15    0.53  11
 -15   2  -1    9.43    0.52  11
 -14  -4  -1    5.54    0.55  11
 -14   2  -2   55.37    0.91  11
 -13  -4  -2   33.44    0.77  11
 -13  -1  -3    3.77    0.62  11
 -11  -6  -2    1.81    0.51  11
 -11   3  -4    1.87    0.60  11
 -11   5  -3   76.91    1.08  11
  -8  -3  -5   21.85    0.81  11
  -7   4  -5    9.65    0.58  11
  -6   0  -6   99.05    1.16  11
  -6   4  -5    8.97    0.51  11
 -16  -3   1    4.94    0.43  11
 -16   5   2   -0.01    0.19  11
 -16   5   2    0.02    0.11  11
 -15   0  -1    0.57    0.43  11
 -15   4   0    9.08    0.49  11
 -14  -1  -2   21.00    0.73  11
 -14   0  -2    3.70    0.61  11
 -14   1  -2   18.23    0.71  11
 -14   4  -1    4.92    0.53  11
 -13  -5  -1   20.85    0.69  11
 -13   4  -2   33.13    0.79  11
 -12  -3  -3    3.71    0.65  11
 -11  -2  -4    2.50    0.70  11
 -11   2  -4    1.88    0.75  11
 -10  -5  -3   45.72    0.98  11
  -9   2  -5  140.55    1.48  11
  -8  -6  -3    0.85    0.48  11
  -8   3  -5   25.62    0.79  11
  -8   5  -4    4.64    0.62  11
  -7  -6  -3   96.11    1.07  11
  -7  -5  -4   32.40    0.73  11
  -7  -3  -5   39.41    0.90  11
  -6  -5  -4   13.55    0.54  11
 -18  -2   4    0.86    0.16  11
 -17   2   2    0.22    0.26  11
 -14  -5   0   42.61    0.74  11
 -13  -6   0    4.54    0.54  11
 -12   3  -3    3.35    0.60  11
 -11  -4  -3    4.88    0.66  11
 -11   1  -4   16.25    0.80  11
 -10  -6  -2    7.30    0.64  11
 -10  -3  -4   21.12    0.78  11
  -9  -4  -4    4.01    0.66  11
  -9  -1  -5    0.43    0.70  11
  -9   0  -5   77.89    1.19  11
  -8  -2  -5    1.67    0.58  11
 -18   2   4    0.98    0.16  11
 -17   1   2    5.92    0.34  11
 -16  -4   2    4.47    0.38  11
 -15  -3   0   14.25    0.57  11
 -15   5   1    2.69    0.36  11
 -14  -3  -1   23.51    0.73  11
 -13   5  -1   18.98    0.76  11
 -12  -2  -3   15.12    0.77  11
 -11   4  -3    4.96    0.75  11
 -10   5  -3   42.92    0.97  11
  -9   4  -4    4.41    0.59  11
  -8  -4  -4   56.95    1.00  11
  -8  -1  -5   64.49    1.13  11
  -8   2  -5    1.61    0.60  11
  -7  -2  -5  188.88    1.56  11
  -6   3  -5   20.58    0.64  11
 -18  -3   5    0.22    0.13  11
 -18  -3   5    0.02    0.07  11
 -18  -1   4    2.70    0.23  11
 -17  -3   3    0.02    0.24  11
 -15   3   0   14.69    0.56  11
 -14   3  -1   22.83    0.70  11
 -12   1  -3    5.14    0.83  11
 -11  -5  -2    4.26    0.62  11
 -10  -2  -4   64.37    1.11  11
 -10   2  -4   67.82    1.23  11
  -8   1  -5   66.13    1.07  11
  -7  -4  -4    0.97    0.52  11
 -18   0   4    0.81    0.12  11
 -18   1   4    1.06    0.13  11
 -18   3   5    0.11    0.16  11
 -17  -4   4    2.79    0.26  11
 -17   3   3    0.14    0.25  11
 -16  -1   1    8.57    0.46  11
 -16   1   1   10.82    0.55  11
 -16   4   2    4.23    0.38  11
 -15  -6   3    3.68    0.40  11
 -15  -4   1   13.13    0.53  11
 -15  -2   0   22.11    0.68  11
 -15   2   0   21.21    0.74  11
 -14  -4   0   31.13    0.80  11
 -14  -2  -1   22.70    0.75  11
 -12   4  -2    3.53    0.76  11
 -11  -3  -3    3.46    0.65  11
 -10  -4  -3    1.15    0.55  11
 -10  -1  -4    2.94    0.66  11
 -10   0  -4    8.87    0.83  11
 -10   1  -4    3.68    0.73  11
  -9   3  -4  215.24    1.80  11
  -7  -1  -5   98.31    1.19  11
  -7   0  -5    3.34    0.51  11
  -6  -1  -5   29.48    0.71  11
 -17  -2   3    0.81    0.29  11
 -16  -3   2    2.73    0.46  11
 -16   5   3    3.82    0.35  11
 -15  -1   0    5.54    0.56  11
 -14  -1  -1   20.43    0.80  11
 -14   1  -1   20.27    0.87  11
 -14   2  -1   24.16    0.78  11
 -12  -6   0   66.82    1.02  11
 -12  -3  -2   -0.74    0.71  11
 -11  -2  -3   27.03    0.95  11
 -10   4  -3    0.47    0.72  11
  -9  -2  -4   56.08    1.03  11
  -8  -3  -4   11.06    0.64  11
  -7  -5  -3    0.68    0.48  11
  -7   4  -4    0.39    0.45  11
 -18  -2   5    0.05    0.08  11
 -17   4   4    2.85    0.28  11
 -14  -5   1    1.89    0.48  11
 -14   4   0   32.91    0.83  11
 -11  -4  -2    1.68    0.70  11
 -11   2  -3   29.10    0.89  11
 -10  -5  -2    5.04    0.61  11
 -10  -3  -3  221.37    1.81  11
  -9  -4  -3  177.29    1.58  11
  -9  -1  -4   48.11    1.07  11
  -8   3  -4   10.65    0.69  11
  -7  -3  -4   30.85    0.75  11
 -18  -3   6    0.19    0.16  11
 -18   2   5    0.31    0.16  11
 -17  -3   4    1.69    0.35  11
 -17  -1   3    0.87    0.32  11
 -17   0   3   17.52    0.54  11
 -17   1   3    0.86    0.31  11
 -16  -5   4    0.80    0.32  11
 -16  -4   3   12.72    0.49  11
 -16   3   2    3.12    0.41  11
 -15  -3   1   53.93    0.89  11
 -15   5   2    4.56    0.49  11
 -14  -3   0   36.27    0.86  11
 -12   3  -2    0.10    0.66  11
 -12   5  -1   60.92    1.02  11
 -11  -1  -3    0.26    0.66  11
 -11   0  -3   44.81    1.03  11
 -11   1  -3   -0.16    0.67  11
 -10  -6  -1   84.68    1.06  11
  -9   1  -4   44.70    0.94  11
  -8  -2  -4   38.86    0.84  11
  -8   5  -3  107.54    1.16  11
 -16  -2   2    7.04    0.44  11
 -15   3   1   47.68    0.91  11
 -14   3   0   39.66    0.93  11
 -14   5   1    2.73    0.60  11
 -13   3  -1    8.39    0.70  11
 -12  -4  -1    1.59    0.63  11
 -12   2  -2   15.23    0.79  11
 -11   4  -2    1.74    0.75  11
 -10  -2  -3   91.02    1.29  11
 -10   5  -2    5.43    0.75  11
  -9  -5  -2  134.88    1.34  11
  -8  -1  -4  148.82    1.45  11
  -7   3  -4   37.05    0.80  11
 -18   3   6    0.26    0.19  11
 -17   3   4    1.24    0.35  11
 -16  -1   2    4.26    0.47  11
 -16   4   3   13.03    0.54  11
 -15  -5   3    0.84    0.47  11
 -15  -2   1   12.64    0.66  11
 -14   6   2    1.63    0.47  11
 -13  -4   0   29.97    0.88  11
 -13   2  -1    7.66    0.81  11
 -12   0  -2   34.30    0.97  11
 -12   1  -2    4.31    0.71  11
 -11  -6   0    8.32    0.58  11
 -11  -3  -2    1.71    0.62  11
 -10   2  -3   87.36    1.30  11
  -9  -3  -3   39.54    0.87  11
  -8   0  -4   65.93    1.01  11
  -8   1  -4  198.61    1.62  11
  -7  -4  -3   64.47    0.90  11
  -7   2  -4  222.52    1.65  11
 -18  -3   7    1.36    0.22  11
 -18  -2   6    3.31    0.25  11
 -16   0   2   32.66    0.73  11
 -16   5   4    1.31    0.37  11
 -15   2   1   12.49    0.67  11
 -14  -6   3   11.22    0.60  11
 -14  -5   2    3.41    0.55  11
 -13  -1  -1    4.69    0.75  11
 -13   0  -1   92.21    1.35  11
 -13   1  -1    5.50    0.84  11
 -11   3  -2    2.33    0.79  11
 -10  -1  -3   49.10    1.02  11
  -8  -5  -2  178.07    1.40  11
  -7  -1  -4   64.42    0.95  11
 -17  -1   4   16.21    0.54  11
 -17   2   4    3.81    0.41  11
 -17   5   6    0.39    0.23  11
 -16  -5   5    2.57    0.41  11
 -16  -4   4    1.82    0.42  11
 -15   1   1   -0.08    0.59  11
 -15   4   2    0.32    0.46  11
 -13  -5   1   26.97    0.76  11
 -11  -2  -2    4.01    0.67  11
 -11   5  -1    0.91    0.59  11
  -9  -2  -3   10.36    0.65  11
  -9   5  -2  132.91    1.37  11
 -18  -1   6   -0.22    0.17  11
 -18  -1   6    0.09    0.11  11
 -18   1   6    0.09    0.22  11
 -17  -4   6    1.66    0.31  11
 -17  -3   5    2.11    0.30  11
 -17   1   4   14.58    0.53  11
 -16   3   3    5.87    0.49  11
 -15  -6   5    8.06    0.44  11
 -15  -3   2   40.41    0.83  11
 -14   4   1   22.99    0.74  11
 -13  -3   0    9.61    0.68  11
 -12   3  -1    6.37    0.82  11
 -11  -4  -1   23.39    0.80  11
 -11  -1  -2   34.24    0.93  11
 -11   2  -2    4.16    0.72  11
 -10   4  -2    5.02    0.66  11
  -9  -4  -2    7.13    0.57  11
  -9  -1  -3    4.66    0.60  11
  -9   2  -3   10.91    0.68  11
 -18  -2   7   -0.05    0.20  11
 -18   3   7    1.12    0.23  11
 -15   5   3    0.67    0.44  11
 -12  -2  -1    0.78    0.64  11
 -12   5   0   36.67    0.87  11
 -11   1  -2   38.42    0.97  11
  -8  -2  -3    3.94    0.54  11
  -8   3  -3   71.48    1.00  11
  -8   5  -2  173.15    1.47  11
 -18  -3   8    1.39    0.20  11
 -17  -2   5   14.82    0.53  11
 -17   3   5    2.72    0.38  11
 -16  -3   4    8.77    0.59  11
 -16   1   3   25.01    0.79  11
 -13  -2   0    1.40    0.65  11
 -13   5   1   26.05    0.76  11
 -12  -1  -1   35.65    0.95  11
 -12   2  -1    1.10    0.66  11
 -11  -6   1   13.34    0.68  11
 -10  -2  -2   82.05    1.17  11
 -10   3  -2   49.85    0.99  11
  -9   4  -2    7.81    0.70  11
  -8  -4  -2  135.86    1.24  11
  -8   2  -3    4.53    0.61  11
 -18  -1   7    0.61    0.24  11
 -18   2   7    0.21    0.22  11
 -17  -4   7    7.96    0.39  11
 -17   2   5   15.80    0.59  11
 -17   4   6    1.26    0.31  11
 -16  -5   6    4.52    0.43  11
 -16  -4   5    0.55    0.43  11
 -15  -1   2    5.06    0.67  11
 -14  -6   4    3.39    0.47  11
 -14  -1   1   37.41    1.03  11
 -14   6   3   10.66    0.53  11
 -13  -6   3   18.00    0.67  11
 -13  -5   2   23.62    0.80  11
 -13  -1   0   39.98    1.03  11
 -13   2   0    1.55    0.65  11
 -12  -6   2   69.45    1.04  11
 -12  -5   1    3.28    0.61  11
 -12   1  -1   40.20    1.03  11
 -11  -3  -1   24.11    0.81  11
 -10  -1  -2   38.92    1.00  11
 -10   2  -2   77.43    1.21  11
  -9  -6   0   41.47    0.76  11
  -8   1  -3  179.08    1.50  11
 -18  -3   9    0.37    0.19  11
 -17  -1   5    0.01    0.29  11
 -17  -1   5   -0.17    0.18  11
 -17   0   5   25.85    0.67  11
 -17   1   5    0.05    0.38  11
 -15  -6   6    1.48    0.38  11
 -15  -3   3    1.01    0.63  11
 -15   1   2    3.69    0.67  11
 -15   4   3    5.84    0.56  11
 -14   1   1   40.49    0.98  11
 -12  -3   0    0.19    0.60  11
 -10   0  -2    6.25    0.67  11
  -8  -5  -1  145.63    1.23  11
 -18  -2   8    0.22    0.12  11
 -18   3   8    2.37    0.22  11
 -16   3   4    9.70    0.56  11
 -14  -3   2   17.02    0.75  11
 -13  -3   1    1.03    0.66  11
 -11  -4   0    0.54    0.73  11
 -11   5   0   68.10    1.13  11
 -10  -6   1    0.44    0.50  11
  -9  -2  -2   31.01    0.77  11
  -8  -3  -2    0.38    0.47  11
 -17  -2   6    0.34    0.38  11
 -17   3   6    2.83    0.40  11
 -16  -1   4    3.41    0.59  11
 -16   2   4   25.40    0.76  11
 -15  -5   5    1.53    0.45  11
 -15  -4   4   15.69    0.62  11
 -15   3   3    1.05    0.61  11
 -15   5   4    6.32    0.51  11
 -12  -2   0   45.73    1.01  11
 -12   3   0   -0.08    0.66  11
 -11  -1  -1   68.45    1.13  11
 -11   2  -1   24.95    0.83  11
 -10  -3  -1   11.34    0.67  11
 -10   4  -1    9.00    0.62  11
  -9  -4  -1  118.65    1.18  11
  -9  -1  -2   68.66    1.06  11
  -9   2  -2   33.53    0.90  11
  -9   5  -1    4.63    0.49  11
 -18  -3  10    0.01    0.14  11
 -18  -3  10    0.05    0.08  11
 -18  -1   8    1.22    0.22  11
 -18  -1   8    0.82    0.15  11
 -18   0   8    2.67    0.31  11
 -18   2   8    0.08    0.18  11
 -18   2   8   -0.02    0.11  11
 -17  -4   8    1.48    0.25  11
 -17  -3   7    0.01    0.38  11
 -17   5   8    0.68    0.25  11
 -16  -3   5    1.84    0.49  11
 -16   0   4  106.85    1.20  11
 -16   1   4    3.65    0.56  11
 -16   4   5    0.57    0.41  11
 -16   6   7   12.24    0.40  11
 -14  -6   5    0.77    0.44  11
 -14  -4   3    0.23    0.56  11
 -14  -2   2   54.85    1.04  11
 -14   3   2   17.13    0.77  11
 -13   3   1    1.21    0.69  11
 -12  -1   0   -0.82    0.74  11
 -12   5   1    3.06    0.59  11
 -11   0  -1    8.96    0.73  11
  -8   3  -2    0.18    0.56  11
 -18  -2   9    0.08    0.12  11
 -18   1   8    2.33    0.25  11
 -18   1   8    0.97    0.16  11
 -18   3   9    0.26    0.18  11
 -18   3   9    0.36    0.11  11
 -17  -1   6    5.42    0.41  11
 -17   1   6    6.76    0.49  11
 -17   2   6    0.11    0.34  11
 -17   2   6    0.20    0.21  11
 -16   5   6    3.25    0.36  11
 -16   5   6    1.51    0.25  11
 -14   6   4    3.36    0.48  11
 -13  -6   4    5.79    0.52  11
 -13  -5   3  120.44    1.32  11
 -13  -1   1   11.47    0.89  11
 -13   6   3   16.36    0.71  11
 -12  -6   3   28.98    0.78  11
 -12  -5   2    0.04    0.58  11
 -12   1   0   -0.47    0.66  11
 -12   6   2   72.19    1.14  11
 -11   4   0    0.93    0.71  11
 -10  -2  -1   34.27    0.84  11
 -10   3  -1   13.67    0.69  11
  -9  -5   0  104.72    1.08  11
 -18  -1   9    0.86    0.26  11
 -17  -4   9    5.78    0.35  11
 -16   3   5    1.30    0.50  11
 -14   0   2    2.78    0.74  11
 -13   0   1   15.60    0.85  11
 -12  -3   1   64.73    1.16  11
 -10  -4   0   97.50    1.14  11
 -10  -1  -1   38.56    0.95  11
 -10   2  -1   35.77    0.94  11
  -9   4  -1  111.67    1.21  11
  -8  -1  -2  110.20    1.15  11
  -8   2  -2   10.67    0.57  11
 -18   1   9    0.43    0.27  11
 -18   2   9    0.14    0.11  11
 -17  -3   8    0.70    0.37  11
 -17   3   7   -0.31    0.39  11
 -16  -5   8    0.13    0.28  11
 -16  -5   8    0.09    0.17  11
 -16  -1   5   73.81    1.11  11
 -16   2   5    1.76    0.64  11
 -16   6   8    5.62    0.36  11
 -15  -4   5   14.15    0.63  11
 -15   5   5    1.23    0.55  11
 -15   6   6    1.18    0.43  11
 -14  -3   3    2.77    0.63  11
 -14   4   3    0.77    0.58  11
 -13  -3   2  108.17    1.29  11
 -13   4   2    0.32    0.77  11
 -11  -2   0    3.94    0.61  11
 -11   3   0    4.68    0.81  11
 -10  -5   1  120.70    1.24  11
 -10   1  -1   39.58    0.89  11
  -8   0  -2  309.39    1.84  11
  -8   1  -2  117.50    1.21  11
 -17  -1   7    0.21    0.39  11
 -17   2   7    1.37    0.45  11
 -17   4   8    1.07    0.29  11
 -16  -4   7   25.65    0.62  11
 -16   1   5   73.93    1.11  11
 -16   4   6   14.46    0.57  11
 -14  -6   6    1.90    0.44  11
 -14  -4   4   17.43    0.77  11
 -12  -2   1   -0.11    0.71  11
 -11  -4   1  142.66    1.37  11
 -11   5   1   66.19    1.09  11
  -9  -2  -1  256.92    1.73  11
  -9   3  -1   10.82    0.67  11
 -18  -1  10    0.21    0.20  11
 -18   2  10    2.21    0.26  11
 -18   3  11    0.45    0.17  11
 -17  -4  10    1.56    0.22  11
 -17   0   7   14.32    0.54  11
 -17   1   7    0.40    0.41  11
 -16  -5   9    6.76    0.42  11
 -16   5   7    8.77    0.43  11
 -14   3   3    2.92    0.66  11
 -13  -6   5    4.63    0.59  11
 -13  -4   3    3.50    0.61  11
 -13  -2   2   93.96    1.27  11
 -13   3   2  116.06    1.46  11
 -12   3   1   68.25    1.11  11
 -12   5   2   -0.33    0.72  11
 -11  -1   0   17.89    0.77  11
 -11   1   0   17.48    0.84  11
 -11   2   0    5.43    0.67  11
 -10  -3   0   42.60    0.86  11
  -9  -4   0   54.20    0.82  11
  -9   5   0   94.60    1.13  11
 -18   0  10    1.48    0.26  11
 -18   1  10   -0.05    0.21  11
 -17  -4  11    4.51    0.30  11
 -17  -3   9    1.41    0.39  11
 -16  -2   6   61.44    0.96  11
 -16   3   6    2.87    0.59  11
 -15  -5   7    1.38    0.50  11
 -15   4   5   13.66    0.73  11
 -14  -1   3   22.00    0.88  11
 -14   2   3    6.79    0.79  11
 -14   6   5    0.88    0.49  11
 -13  -5   4    6.59    0.59  11
 -13  -1   2    7.86    0.77  11
 -13   5   3  130.39    1.38  11
 -12  -5   3  116.36    1.23  11
 -12  -1   1    8.25    0.71  11
 -12   2   1    0.95    0.68  11
 -11   6   2   24.72    0.83  11
  -9   1  -1   57.26    0.99  11
 -18  -1  11    1.66    0.22  11
 -18   2  11    0.33    0.20  11
 -18   3  12   -0.00    0.10  11
 -18   3  12   -0.03    0.05  11
 -17  -4  12    0.17    0.19  11
 -17   4   9    7.77    0.42  11
 -16  -4   8    2.10    0.44  11
 -16  -3   7    3.10    0.49  11
 -16  -1   6    3.53    0.69  11
 -16   6   9    0.02    0.23  11
 -16   6   9    0.09    0.13  11
 -15  -4   6   11.38    0.60  11
 -14  -6   7    2.81    0.52  11
 -14  -3   4   59.79    1.09  11
 -14   1   3   21.57    0.89  11
 -13   1   2    7.87    0.73  11
 -13   2   2  104.98    1.34  11
 -13   6   4    5.73    0.56  11
 -12   1   1    9.24    0.73  11
 -12   6   3   30.98    0.81  11
 -11  -3   1   10.02    0.70  11
 -11   4   1  124.25    1.35  11
 -10  -4   1   23.26    0.75  11
 -10   3   0   38.48    0.90  11
 -18  -1  12    0.08    0.18  11
 -18   1  11    1.54    0.26  11
 -17   1   8    4.15    0.49  11
 -17   2   8    1.11    0.43  11
 -16  -5  10   -0.06    0.26  11
 -16  -5  10   -0.18    0.14  11
 -16   0   6   51.30    0.97  11
 -16   1   6    3.09    0.63  11
 -16   2   6   56.47    0.99  11
 -16   4   7   28.19    0.69  11
 -16   5   8    0.45    0.41  11
 -15   5   6   41.67    0.81  11
 -14   4   4   18.38    0.75  11
 -13  -3   3   56.07    1.00  11
 -12  -3   2   63.48    1.03  11
 -12   4   2   68.10    1.17  11
 -10  -1   0    7.56    0.64  11
 -10   5   1  132.75    1.35  11
  -9  -3   0  261.49    1.66  11
 -18  -1  13    0.37    0.13  11
 -18   2  12    2.34    0.22  11
 -17  -3  10   10.23    0.39  11
 -17  -2   9    7.90    0.43  11
 -17   3   9    2.54    0.42  11
 -17   5  12    3.28    0.22  11
 -16  -5  11   31.00    0.55  11
 -16  -2   7    0.53    0.61  11
 -16   6  10    6.48    0.36  11
 -14  -4   5   14.17    0.67  11
 -14  -2   4    3.78    0.72  11
 -11  -4   2    2.41    0.55  11
 -11  -2   1    3.17    0.59  11
 -11   3   1   10.89    0.78  11
 -10  -5   2    1.76    0.46  11
 -10   0   0    6.89    0.58  11
 -10   2   0    3.30    0.58  11
 -18   0  12    0.35    0.10  11
 -18   1  12    0.19    0.10  11
 -18   2  13    0.86    0.14  11
 -18   2  13    0.27    0.08  11
 -16  -4   9    3.30    0.40  11
 -16  -3   8   17.33    0.66  11
 -16   3   7    2.94    0.54  11
 -15  -5   8   34.35    0.69  11
 -15  -4   7   54.14    0.93  11
 -14   3   4   69.88    1.12  11
 -13  -5   5    0.93    0.64  11
 -13  -2   3    4.71    0.66  11
 -12  -6   5   27.57    0.79  11
 -12  -2   2  259.14    1.83  11
 -12   3   2   69.25    1.19  11
 -11  -5   3    0.68    0.56  11
 -11  -1   1   28.67    0.82  11
 -11   5   2   54.88    0.97  11
  -9  -2   0   10.16    0.63  11
 -18   1  13    0.32    0.08  11
 -17   0   9    1.33    0.42  11
 -17   1   9   -0.21    0.41  11
 -16  -1   7   34.39    0.84  11
 -16   2   7    0.73    0.61  11
 -16   4   8    2.61    0.52  11
 -16   5   9    5.29    0.44  11
 -16   6  11    0.11    0.24  11
 -14   2   4    2.97    0.67  11
 -13  -1   3   -0.75    0.71  11
 -13   3   3   59.83    1.09  11
 -13   5   4    6.67    0.67  11
 -12  -5   4   39.58    0.80  11
 -12  -1   2   46.61    0.99  11
 -12   5   3  110.46    1.24  11
 -11   1   1   28.02    0.82  11
 -11   2   1    3.48    0.57  11
 -10  -3   1  131.25    1.27  11
  -9  -4   1  248.77    1.56  11
  -9   3   0  287.49    1.77  11
 -16  -4  10    3.72    0.41  11
 -16   1   7   33.33    0.83  11
 -15  -5   9   36.65    0.73  11
 -14   1   4    1.71    0.73  11
 -13   1   3   -0.24    0.80  11
 -13   2   3    3.48    0.68  11
 -13   6   5    4.53    0.56  11
 -12   1   2   46.62    0.99  11
 -12   6   4   32.03    0.91  11
 -11   6   3   81.22    1.07  11
  -9   2   0    9.36    0.63  11
  -9   5   1   22.47    0.69  11
 -17  -3  13    3.46    0.25  11
 -17  -3  14    3.27    0.21  11
 -17  -3  14    0.42    0.11  11
 -17   4  12    1.05    0.27  11
 -16  -3   9    6.38    0.55  11
 -16  -2   8   13.46    0.64  11
 -16   3   8   15.47    0.72  11
 -16   6  12    1.91    0.25  11
 -14  -4   6   85.69    1.09  11
 -13  -3   4   30.46    0.83  11
 -11   4   2    2.98    0.56  11
 -10  -2   1   28.98    0.73  11
  -9   1   0   33.02    0.74  11
 -17   1  10    3.94    0.42  11
 -17   3  11   13.86    0.50  11
 -17   4  13    1.44    0.22  11
 -16  -4  11   15.79    0.50  11
 -16  -1   8    0.26    0.62  11
 -16   5  10    0.14    0.35  11
 -16   6  13    1.40    0.18  11
 -15  -4   8   12.73    0.56  11
 -15  -1   6   15.68    0.76  11
 -14  -2   5   15.77    0.78  11
 -14   3   5   25.57    0.95  11
 -14   5   6    2.56    0.67  11
 -13  -4   5   15.41    0.71  11
 -12   4   3    2.24    0.62  11
 -11  -4   3    3.12    0.62  11
 -11  -2   2   24.00    0.80  11
 -10  -1   1   18.81    0.69  11
 -10   3   1  123.83    1.26  11
  -9  -3   1  183.86    1.38  11
 -17  -2  12    0.10    0.30  11
 -17  -1  11    0.21    0.42  11
 -17   4  14    0.11    0.12  11
 -17   4  14    0.08    0.07  11
 -16   0   8   51.90    0.97  11
 -16   1   8    0.41    0.64  11
 -16   2   8   14.07    0.68  11
 -16   4   9    4.18    0.48  11
 -15  -5  10   36.51    0.70  11
 -15   4   7   56.44    0.95  11
 -15   5   8   31.86    0.82  11
 -14  -1   5   10.61    0.73  11
 -13  -2   4   54.12    1.00  11
 -12  -6   6   12.46    0.59  11
 -12  -5   5    2.88    0.62  11
 -12  -2   3   19.09    0.73  11
 -11   3   2    6.56    0.67  11
 -10  -5   3   60.04    0.83  11
 -10   1   1   19.17    0.71  11
 -10   2   1   27.60    0.74  11
 -10   5   2    2.92    0.48  11
  -9   4   1  278.07    1.71  11
 -17  -2  13   14.97    0.41  11
 -17  -2  15    1.87    0.18  11
 -17   0  11    8.08    0.44  11
 -17   1  11    0.00    0.36  11
 -17   2  11    1.09    0.35  11
 -17   3  12    6.34    0.37  11
 -16  -4  12    5.19    0.38  11
 -16  -3  10    0.47    0.42  11
 -16  -2   9    5.95    0.57  11
 -14  -4   7   21.79    0.76  11
 -14  -3   6   -0.19    0.63  11
 -14   1   5   11.09    0.75  11
 -14   2   5   15.54    0.77  11
 -13  -1   4   48.84    1.00  11
 -13   5   5    0.93    0.63  11
 -12   5   4   39.00    0.94  11
 -11  -1   2   30.86    0.78  11
 -11   2   2   26.57    0.85  11
 -11   5   3    2.20    0.54  11
 -10  -3   2   11.30    0.66  11
 -17   3  13    3.02    0.29  11
 -16  -4  13    5.05    0.32  11
 -16  -4  14    2.21    0.25  11
 -16   3   9    7.13    0.57  11
 -16   4  10    3.96    0.51  11
 -15  -5  11    4.81    0.45  11
 -15  -4   9   93.58    1.03  11
 -15  -1   7    3.08    0.78  11
 -15   6  10    4.60    0.45  11
 -14   4   6   69.02    1.07  11
 -13  -6   8   36.01    0.71  11
 -13   1   4   48.58    1.01  11
 -13   2   4   53.81    1.02  11
 -12   2   3   20.25    0.77  11
 -11  -3   3   42.70    0.91  11
 -11   1   2   32.44    0.80  11
  -9  -4   2    4.79    0.44  11
 -17  -1  13    6.13    0.32  11
 -17  -1  15    0.16    0.15  11
 -17   1  12    5.89    0.39  11
 -17   2  12    0.05    0.23  11
 -17   2  12    0.18    0.14  11
 -17   3  14    3.12    0.25  11
 -17   3  14    0.92    0.14  11
 -16  -3  11    2.49    0.47  11
 -16  -2  10   14.22    0.68  11
 -16   1   9    7.45    0.72  11
 -15  -5  12    1.29    0.35  11
 -15   0   7    5.30    0.69  11
 -14  -2   6  103.71    1.23  11
 -14   6   8    2.72    0.61  11
 -13   4   5   15.72    0.88  11
 -12  -3   4    6.05    0.63  11
 -12   6   5   27.85    0.78  11
 -11   6   4   33.55    0.76  11
 -17  -1  14    1.83    0.20  11
 -17   0  13    2.71    0.33  11
 -17   2  13   14.44    0.43  11
 -17   2  15    3.35    0.23  11
 -16   5  13    1.44    0.27  11
 -15  -4  10    2.39    0.52  11
 -15   5   9   37.16    0.75  11
 -14  -1   6    0.03    0.73  11
 -14   3   6    0.41    0.62  11
 -12  -4   5    0.51    0.65  11
 -12   4   4   42.53    0.92  11
 -11   4   3    2.58    0.54  11
 -10  -4   3   50.10    0.79  11
 -17   0  15    2.77    0.21  11
 -17   0  15    0.59    0.11  11
 -17   1  14    2.58    0.25  11
 -17   1  15    0.18    0.15  11
 -16  -3  12   16.41    0.50  11
 -16  -1  10    0.21    0.54  11
 -16   4  11   23.59    0.59  11
 -15   6  11   17.38    0.53  11
 -14  -4   8  145.36    1.33  11
 -14  -3   7   60.81    1.02  11
 -14   0   6    1.08    0.80  11
 -14   2   6  100.23    1.27  11
 -13   3   5   47.28    1.04  11
 -13   5   6   16.93    0.84  11
 -12  -5   6    5.10    0.52  11
 -12  -2   4   94.06    1.17  11
 -11  -5   5   16.44    0.65  11
 -11  -4   4    7.26    0.56  11
 -11  -2   3   21.47    0.69  11
 -16  -3  13    2.04    0.33  11
 -16  -3  14    1.83    0.31  11
 -16  -2  11   32.76    0.72  11
 -14   4   7   21.86    0.78  11
 -13  -3   6   63.25    1.08  11
 -13  -1   5    5.81    0.67  11
 -12   5   5    2.84    0.65  11
 -11  -1   3    0.34    0.57  11
 -11   3   3   41.59    0.85  11
 -10   2   2    4.01    0.53  11
 -10   5   3   50.78    0.83  11
 -16  -2  12    8.72    0.57  11
 -16   3  11    2.69    0.49  11
 -16   4  12    9.36    0.46  11
 -15  -4  11   45.46    0.76  11
 -15   4   9   86.10    1.12  11
 -15   5  10   28.70    0.70  11
 -15   6  12   12.01    0.39  11
 -14  -5  10    0.05    0.46  11
 -14  -2   7    1.45    0.60  11
 -14   6   9    2.92    0.50  11
 -13  -5   8   51.67    0.86  11
 -13   0   5    7.78    0.69  11
 -13   1   5    5.20    0.68  11
 -12  -1   4    6.06    0.63  11
 -12   2   4   87.70    1.18  11
 -12   6   6   12.21    0.70  11
 -11   2   3   24.38    0.76  11
 -11   5   4    4.11    0.55  11
 -10  -3   3    5.94    0.49  11
 -16  -2  16    0.62    0.19  11
 -16   2  11   32.85    0.77  11
 -16   4  13    4.47    0.39  11
 -15  -4  12   14.73    0.58  11
 -15  -4  16    0.45    0.18  11
 -15  -3  10   47.64    0.85  11
 -15   6  13    0.89    0.27  11
 -15   6  14    6.30    0.32  11
 -14  -4   9   -0.08    0.56  11
 -14  -3   8   28.91    0.82  11
 -14  -1   7   52.60    1.06  11
 -14   3   7   60.33    1.03  11
 -13   4   6   27.52    0.84  11
 -12   1   4    6.81    0.64  11
 -11   1   3    0.74    0.50  11
 -16  -2  14    4.57    0.42  11
 -16  -2  15    4.88    0.34  11
 -16   1  11   10.01    0.61  11
 -16   3  12   19.01    0.60  11
 -16   4  14    3.78    0.27  11
 -15  -4  13    3.88    0.44  11
 -15  -4  15    0.67    0.25  11
 -15   4  10    1.82    0.59  11
 -15   5  11    5.15    0.47  11
 -14  -5  11   66.19    0.86  11
 -14   1   7   51.70    1.09  11
 -14   2   7    1.57    0.64  11
 -13  -2   6   18.24    0.77  11
 -12  -5   7   36.28    0.76  11
 -12  -4   6   16.46    0.65  11
 -12   4   5   -0.21    0.59  11
 -11   4   4    7.40    0.66  11
 -10  -4   4   67.10    0.90  11
 -10   4   3   65.42    0.91  11
 -16   0  12    2.33    0.46  11
 -16   1  12    0.08    0.51  11
 -16   2  12   10.62    0.55  11
 -16   3  13    3.83    0.43  11
 -16   3  16    1.81    0.20  11
 -15  -4  14    1.28    0.30  11
 -15  -3  11   25.30    0.68  11
 -14  -5  12   12.72    0.54  11
 -14  -2   8   46.69    0.98  11
 -14   6  10   13.60    0.58  11
 -13  -5   9   63.94    0.96  11
 -13  -3   7    8.78    0.74  11
 -13  -1   6   12.96    0.72  11
 -13   3   6   69.88    1.08  11
 -13   5   7   60.06    1.01  11
 -13   6   8   38.53    0.82  11
 -12  -2   5  236.46    1.64  11
 -11  -5   6   45.34    0.83  11
 -11  -4   5  204.84    1.44  11
 -11  -2   4   15.02    0.65  11
 -10  -5   5  115.47    1.08  11
  -9  -5   4   36.22    0.63  11
 -16  -1  16   -0.10    0.18  11
 -16   2  13   17.54    0.60  11
 -16   3  14    2.48    0.35  11
 -16   3  15    1.24    0.23  11
 -15   3  10   47.59    0.98  11
 -15   5  12    1.12    0.38  11
 -14  -3   9   93.35    1.19  11
 -13   1   6   10.44    0.81  11
 -13   2   6   16.50    0.75  11
 -12  -1   5   13.15    0.75  11
 -12   3   5   59.45    1.00  11
 -12   5   6    4.31    0.70  11
 -11   3   4  114.95    1.26  11
 -10   3   3    6.29    0.51  11
  -9   5   3   69.09    0.86  11
 -16   0  14    0.91    0.38  11
 -16   0  16   10.67    0.36  11
 -16   1  13   13.52    0.50  11
 -16   2  15    5.44    0.35  11
 -16   2  16    0.71    0.19  11
 -15  -3  12   28.36    0.67  11
 -15   4  11   54.91    0.87  11
 -15   5  13    2.45    0.39  11
 -15   5  16    0.34    0.17  11
 -14  -5  14    5.14    0.35  11
 -14  -1   8   14.99    0.74  11
 -14   3   8   27.16    0.85  11
 -14   6  11    1.96    0.50  11
 -13   4   7    2.20    0.64  11
 -12   6   7    4.59    0.64  11
 -11  -1   4   69.31    0.94  11
 -11   5   5   17.38    0.63  11
 -10   2   3   50.04    0.88  11
 -10   5   4   42.73    0.77  11
 -16   1  14    5.57    0.40  11
 -16   1  15   21.10    0.52  11
 -16   1  16    0.15    0.17  11
 -16   1  16   -0.11    0.10  11
 -15  -3  13    6.54    0.46  11
 -15   5  14    0.56    0.28  11
 -15   5  15    0.16    0.20  11
 -13  -5  10   19.65    0.63  11
 -13  -2   7    9.48    0.65  11
 -13   5   8   45.77    0.98  11
 -12  -5   8    4.16    0.54  11
 -12  -4   7   22.26    0.71  11
 -12   1   5   12.91    0.68  11
 -11   1   4   59.91    0.92  11
 -11   6   6    5.32    0.62  11
 -15  -3  14   11.51    0.45  11
 -15  -2  12   66.31    0.99  11
 -15  -1  11   42.58    0.92  11
 -15   3  11   29.38    0.79  11
 -15   4  12   26.99    0.67  11
 -15   4  17    1.03    0.18  11
 -14  -3  10   37.89    0.83  11
 -14  -2   9   11.18    0.67  11
 -14   6  12    9.18    0.55  11
 -14   6  16    0.29    0.17  11
 -13  -4   9   45.26    0.93  11
 -13  -3   8  101.44    1.18  11
 -13  -1   7    0.58    0.70  11
 -13   3   7   10.00    0.73  11
 -13   7  11    0.65    0.43  11
 -12  -2   6  123.01    1.29  11
 -12   4   6   16.83    0.76  11
 -11  -4   6   -0.05    0.54  11
 -15  -2  17    3.54    0.23  11
 -15   2  11    2.99    0.60  11
 -15   4  13    3.21    0.52  11
 -14  -4  12    7.19    0.54  11
 -14   3   9   95.72    1.18  11
 -13   0   7   25.57    0.79  11
 -13   1   7    1.21    0.76  11
 -11  -5   7    7.92    0.52  11
 -11   4   5  204.26    1.49  11
 -10  -4   5  140.34    1.15  11
 -10   4   4   75.21    0.93  11
 -15  -2  13    3.56    0.50  11
 -15  -2  14    9.92    0.56  11
 -15  -2  16   -0.04    0.31  11
 -15  -1  12    7.85    0.63  11
 -15   2  18   -0.00    0.11  11
 -15   4  14    0.75    0.43  11
 -15   4  15    0.95    0.33  11
 -15   4  16    0.93    0.14  11
 -14  -4  13    2.34    0.50  11
 -14  -4  16    0.67    0.25  11
 -14  -2  10   70.08    1.10  11
 -14   1   9    5.75    0.73  11
 -14   2   9   10.66    0.75  11
 -14   5  11   50.91    0.87  11
 -14   6  14    1.13    0.36  11
 -14   6  15    0.01    0.26  11
 -13   4   8   21.67    0.78  11
 -12  -5   9    5.50    0.62  11
 -12  -3   7   61.96    1.01  11
 -12  -1   6   22.07    0.72  11
 -12   3   6   36.26    0.85  11
 -10  -5   6   16.99    0.52  11
 -10  -2   4  380.16    1.85  11
  -9  -5   5    6.69    0.43  11
 -15  -2  15    3.83    0.38  11
 -15  -1  13   42.37    0.88  11
 -15  -1  17   -0.19    0.23  11
 -15   1  12    6.39    0.65  11
 -15   1  18    0.22    0.12  11
 -15   1  18    0.03    0.07  11
 -15   2  12   71.35    1.01  11
 -15   3  13    5.95    0.60  11
 -15   3  17    0.07    0.08  11
 -14  -4  14    9.82    0.46  11
 -14  -4  15    0.64    0.34  11
 -13  -4  10   10.86    0.64  11
 -13  -3   9   42.12    0.93  11
 -12  -4   8    5.93    0.59  11
 -12   1   6   23.10    0.75  11
 -12   2   6  123.26    1.25  11
 -11  -1   5  165.36    1.34  11
 -11   3   5    1.72    0.52  11
 -11   5   6   45.92    0.87  11
 -10  -1   4  218.29    1.45  11
 -10   3   4    8.33    0.51  11
 -15  -1  16    6.76    0.41  11
 -15   0  13   81.90    1.08  11
 -15   2  13    3.74    0.60  11
 -15   2  17    3.50    0.27  11
 -15   3  14   13.49    0.56  11
 -15   3  15   12.93    0.53  11
 -15   3  16    1.45    0.30  11
 -14  -3  17    8.85    0.34  11
 -14  -1  10   14.04    0.71  11
 -14   3  10   36.75    0.86  11
 -14   5  17    0.42    0.17  11
 -13  -5  13    5.43    0.50  11
 -13  -1   8   35.78    0.86  11
 -13   3   8  109.20    1.24  11
 -13   7  14    3.45    0.34  11
 -12   7  10    0.03    0.50  11
 -11   0   5  274.24    1.71  11
 -11   1   5  162.47    1.38  11
 -11   2   5    9.99    0.61  11
 -11   6   7  252.23    1.69  11
 -10  -3   5   69.57    0.89  11
 -10   5   5  134.65    1.16  11
 -15   1  17   -0.11    0.21  11
 -15   2  16    0.06    0.30  11
 -14  -2  11    3.56    0.61  11
 -14  -2  18    2.04    0.21  11
 -14   0  10   13.93    0.77  11
 -14   1  10   14.55    0.75  11
 -14   4  18    0.23    0.13  11
 -13  -4  11    6.51    0.64  11
 -13   2   8    5.16    0.65  11
 -13   4   9   41.71    0.98  11
 -12  -5  10   28.99    0.71  11
 -12  -2   7  135.33    1.26  11
 -11  -4   7    4.23    0.48  11
 -10   1   4  211.83    1.41  11
 -10   6   6  104.25    1.09  11
 -15   1  14    2.58    0.41  11
 -15   1  16    7.74    0.40  11
 -15   2  15    1.93    0.32  11
 -14  -3  13   13.29    0.57  11
 -14  -3  14   10.97    0.56  11
 -14  -3  16   -0.17    0.31  11
 -14  -1  11   15.66    0.82  11
 -14   5  14    4.35    0.46  11
 -14   5  16    4.36    0.29  11
 -13  -3  10  102.41    1.21  11
 -13   5  10   20.30    0.74  11
 -12  -4   9   74.81    1.06  11
 -12  -1   7   37.52    0.90  11
 -12   5   8    4.24    0.63  11
 -11  -2   6    0.67    0.50  11
 -11   4   6    0.66    0.53  11
 -10  -5   7  233.85    1.44  11
 -10  -4   6  120.63    1.06  11
 -14  -3  15    2.17    0.33  11
 -14  -3  15    0.25    0.19  11
 -14   1  19    4.04    0.19  11
 -14   2  11    3.21    0.72  11
 -13   3   9   36.44    0.94  11
 -13   6  12    0.74    0.46  11
 -12  -5  11   67.62    0.94  11
 -12   2   7  140.03    1.34  11
 -10  -2   5  209.43    1.37  11
 -10   4   5  146.06    1.19  11
 -14  -2  13    0.65    0.61  11
 -14  -2  17   -0.38    0.25  11
 -14   1  11   16.00    0.75  11
 -14   3  18    0.41    0.17  11
 -14   4  13    0.92    0.50  11
 -14   4  17    0.10    0.12  11
 -13   4  10   10.62    0.77  11
 -13   5  11    0.32    0.59  11
 -13   5  18    0.68    0.16  11
 -13   6  13    8.96    0.56  11
 -13   6  16    0.00    0.26  11
 -12   1   7   34.32    0.82  11
 -12   4   8    6.47    0.77  11
 -11  -3   7   -0.02    0.46  11
 -11  -1   6   53.35    0.82  11
 -11   5   7    7.90    0.55  11
 -14  -2  14   46.25    0.82  11
 -14  -2  15    4.07    0.52  11
 -14  -2  16   17.97    0.52  11
 -14   2  18    1.57    0.23  11
 -14   4  14    8.77    0.53  11
 -14   4  15    0.51    0.43  11
 -14   4  16    1.11    0.33  11
 -13  -4  14    1.19    0.49  11
 -13  -4  15    1.93    0.43  11
 -13  -4  16    0.15    0.25  11
 -13  -4  16    0.12    0.15  11
 -13  -3  18    0.42    0.17  11
 -13  -3  18    0.19    0.09  11
 -13   1   9    0.31    0.60  11
 -12  -5  12    5.00    0.56  11
 -12  -4  10    9.67    0.68  11
 -12  -2   8  103.43    1.14  11
 -12   7  12    9.26    0.51  11
 -11  -4   8    5.60    0.49  11
 -11   2   6    0.69    0.48  11
 -10  -1   5   91.54    0.95  11
 -10   3   5   88.90    0.96  11
 -14   1  18    0.29    0.21  11
 -14   3  13   13.26    0.64  11
 -14   3  17    8.72    0.36  11
 -13  -1  10  107.76    1.27  11
 -13   3  10  100.49    1.20  11
 -12  -3   9   10.45    0.68  11
 -12  -1   8   28.14    0.77  11
 -12   3   8    8.00    0.66  11
 -10  -5   8    9.28    0.52  11
 -10  -3   6   50.71    0.74  11
 -10   1   5   84.42    0.96  11
 -10   2   5  211.71    1.39  11
 -14  -1  14   15.32    0.63  11
 -14  -1  15   85.09    1.05  11
 -14  -1  16   -0.05    0.40  11
 -14   2  13    0.99    0.59  11
 -14   2  17   -0.37    0.29  11
 -14   3  14   12.03    0.60  11
 -14   3  15    4.11    0.56  11
 -14   3  16   -0.20    0.37  11
 -13  -3  12   14.72    0.62  11
 -13  -3  17    1.97    0.32  11
 -13  -2  11   74.13    1.05  11
 -13  -1  19   -0.02    0.15  11
 -13   2  10  108.84    1.26  11
 -13   3  19    0.43    0.13  11
 -13   4  11    5.56    0.64  11
 -13   5  17    4.10    0.31  11
 -12  -5  14   15.83    0.59  11
 -12  -5  15   27.38    0.55  11
 -12   0   8   29.10    0.78  11
 -12   2   8   86.98    1.11  11
 -12   6  11    0.05    0.59  11
 -11  -2   7    5.90    0.53  11
 -11   4   7    4.59    0.54  11
 -14   0  14    4.53    0.61  11
 -14   0  16    0.62    0.47  11
 -14   1  17    5.42    0.33  11
 -14   2  14   56.78    0.91  11
 -14   2  15    4.92    0.54  11
 -13  -2  18   -0.10    0.23  11
 -13   1  10  119.65    1.32  11
 -13   4  18    2.51    0.25  11
 -13   5  13    5.17    0.53  11
 -12  -3  10    6.06    0.71  11
 -12  -2   9   66.12    0.98  11
 -12   4   9   75.61    1.04  11
 -12   5  10   29.50    0.87  11
 -11  -4   9   86.39    1.03  11
 -11  -3   8   18.07    0.62  11
 -11   3   7    0.52    0.63  11
 -11   5   8  109.38    1.16  11
 -11   6   9    4.85    0.66  11
 -10  -2   6   17.45    0.56  11
 -14   1  15   79.57    0.99  11
[truncated: 1,442,502 more chars]
